# Supplementary material
Source: PubMed Central journal article supplement (PMC5970092)
Supplement: NIHMS961347-supplement-Graphic_Abstract.pdf [file NIHMS961347-supplement-Graphic_Abstract.pdf]

**Proliferating  
IH**

**Propranolol**  
→  
**EndMT**

**Involuting  
IH**

**LIN28B C19MC**

**Let-7**
