# Supplementary material
Source: PubMed Central journal article supplement (PMC5970092)
Supplement: NIHMS961347-supplement-Supplemental_Material.pdf [file NIHMS961347-supplement-Supplemental_Material.pdf]

## Supplementary Material

### **Modulation of LIN28B/Let-7 signaling by propranolol contributes to infantile hemangioma involution**

Ezinne Frances Mong<sup>1\*</sup>, Kemal Marc Akat<sup>2\*</sup>, John Canfield<sup>1</sup>, John Lockhart<sup>1</sup>, Jeffrey VanWye<sup>1</sup>, Andrew Matar<sup>1</sup>, John C.M. Tsibris<sup>3</sup>, June Wu<sup>4</sup>, Thomas Tuschl<sup>2</sup> and Hana Totary-Jain<sup>1</sup>.

<sup>1</sup> Department of Molecular Pharmacology & Physiology, Morsani College of Medicine, University of South Florida, Tampa, Florida, U.S.A.

<sup>2</sup> Howard Hughes Medical Institute and Laboratory for RNA Molecular Biology, The Rockefeller University, New York, New York, USA

<sup>3</sup> Department of Obstetrics and Gynecology, Morsani College of Medicine, University of South Florida, Tampa, Florida, U.S.A.

<sup>4</sup> Department of Surgery, Columbia University College of Physicians and Surgeons, New York, New York, USA

\* Equally contributed

**Supplementary Table S I**

| <b>Identifier</b> | <b>Patient age</b> | <b>Sex</b> | <b>IH location</b> | <b>Treatment</b> | <b>Stage of IH</b>         | <b>Preparation</b> |
|-------------------|--------------------|------------|--------------------|------------------|----------------------------|--------------------|
| <b>25</b>         | 1.5 months         | Female     | Subglottic         | None             | Proliferating; obstructive | Paraffin embedded  |
| <b>84</b>         | 4 months           | Male       | L cheek            | Propranolol      | propranolol                | Paraffin embedded  |
| <b>24</b>         | 5 months           | Female     | Retroauricular     | None             | Proliferating; ulcerated   | Paraffin embedded  |
| <b>24</b>         | 5 months           | Female     | Retroauricular     | None             | Ulcerating                 | Fresh              |
| <b>66</b>         | 5 months           | Male       | Upper back         | Propranolol      | Proliferating; ulcerated   | Paraffin embedded  |
| <b>82</b>         | 6 months           | Female     | trunk (left side)  | None             | Proliferating              | Paraffin embedded  |
| <b>62</b>         | 7 months           | Female     | Scalp              | Propranolol      | Proliferating; ulcerated   | Paraffin embedded  |
| <b>63</b>         | 9 months           | Female     | Scalp              | None             | Proliferating; bleeding    | Paraffin embedded  |
| <b>26</b>         | 15 months          | Female     | Forehead           | None             | Involuting                 | Fresh              |
| <b>21b</b>        | 18 months          | Female     | Forehead           | None             | Stable/involuting          | Fresh              |
| <b>19</b>         | 18 months          | Female     | Chin               | None             | Stable                     | Fresh              |
| <b>27</b>         | 24 months          | Female     | Anterior neck      | None             | Involuting                 | Paraffin embedded  |
| <b>27</b>         | 24 months          | Female     | Anterior neck      | None             | Involuting                 | Fresh              |
| <b>54</b>         | 24 months          | Female     | Right shoulder     | None             | Stable/involuting          | Fresh              |
| <b>36</b>         | 24 months          | Female     | Cheek              | None             | Involuting                 | Paraffin embedded  |
| <b>55</b>         | 30 months          | Female     | Chest wall         | None             | Involuting                 | Fresh              |
| <b>65</b>         | 36 months          | Female     | Cheek              | Propranolol      | Pockets of proliferation   | Paraffin embedded  |
| <b>28</b>         | 36 months          | Female     | Chin               | None             | Ulcerating/proliferating   | Fresh              |
| <b>80</b>         | 36 months          | Male       | RUE                | None             | Involuted                  | Paraffin embedded  |
| <b>23</b>         | 36 months          | Female     | cheek              | None             | Involuted                  | Paraffin embedded  |
| <b>18b</b>        | 84 months          | Female     | Trunk (left side)  | None             | Involuting                 | Paraffin embedded  |

|    | A                                                                                                                                       | B | C | D | E | F | G |
|----|-----------------------------------------------------------------------------------------------------------------------------------------|---|---|---|---|---|---|
| 1  | <b>SUPPLEMENTARY TABLE SII</b>                                                                                                          |   |   |   |   |   |   |
| 2  | <b>TABLE LEGEND</b>                                                                                                                     |   |   |   |   |   |   |
| 3  |                                                                                                                                         |   |   |   |   |   |   |
| 4  | <b>Sheet "miRNAs IH-NS":</b> small miRNA sequencing data of IH compared to NS.                                                          |   |   |   |   |   |   |
| 5  |                                                                                                                                         |   |   |   |   |   |   |
| 6  | <b>Sheet "miRNAs HUVEC-NS":</b> small miRNA sequencing data of HUVECs compared to NS.                                                   |   |   |   |   |   |   |
| 7  |                                                                                                                                         |   |   |   |   |   |   |
| 8  | <b>Sheet "miRNAs HemSC-NS":</b> small miRNA sequencing data of HemSCs compared to NS.                                                   |   |   |   |   |   |   |
| 9  |                                                                                                                                         |   |   |   |   |   |   |
| 10 | <b>Sheet "miRNAs iPSC-NS":</b> small miRNA sequencing data of iPSCs compared to NS.                                                     |   |   |   |   |   |   |
| 11 |                                                                                                                                         |   |   |   |   |   |   |
| 12 |                                                                                                                                         |   |   |   |   |   |   |
| 13 | <b>Sheet "cistrons IH-NS":</b> small miRNA sequencing data showing miRNA cistrons differentially expressed in IH compared to NS.        |   |   |   |   |   |   |
| 14 |                                                                                                                                         |   |   |   |   |   |   |
| 15 | <b>Sheet "cistrons HUVEC-NS":</b> small miRNA sequencing data showing miRNA cistrons differentially expressed in HUVECs compared to NS. |   |   |   |   |   |   |
| 16 |                                                                                                                                         |   |   |   |   |   |   |
| 17 | <b>Sheet "cistrons HemSC-NS":</b> small miRNA sequencing data showing miRNA cistrons differentially expressed in HemSCs compared to NS. |   |   |   |   |   |   |
| 18 |                                                                                                                                         |   |   |   |   |   |   |
| 19 | <b>Sheet "cistrons iPSC-NS":</b> small miRNA sequencing data showing miRNA cistrons differentially expressed in iPSCs compared to NS.   |   |   |   |   |   |   |

|    | A               | B                      | C        | D           | E        | F        |
|----|-----------------|------------------------|----------|-------------|----------|----------|
| 1  |                 | Relative frequency (%) |          |             |          |          |
| 2  | miRNA           | IH                     | NS       | Fold change | P Value  | FDR      |
| 3  | let-7a-2STAR(1) | 0.000015               | 0.000220 | -8.0        | 3.47E-04 | 1.58E-03 |
| 4  | let-7a(3)       | 2.478397               | 5.578450 | -2.3        | 1.61E-03 | 6.10E-03 |
| 5  | let-7c(1)       | 0.300762               | 1.074958 | -3.6        | 1.87E-02 | 4.48E-02 |
| 6  | let-7cSTAR(1)   | 0.000535               | 0.001228 | -2.3        | 2.47E-02 | 5.60E-02 |
| 7  | let-7dSTAR(1)   | 0.009897               | 0.017735 | -1.8        | 4.83E-02 | 9.69E-02 |
| 8  | let-7f-1STAR(1) | 0.001221               | 0.002216 | -1.8        | 6.91E-02 | 1.29E-01 |
| 9  | let-7f-2STAR(1) | 0.000554               | 0.001577 | -2.7        | 1.12E-02 | 3.04E-02 |
| 10 | let-7f(2)       | 3.297656               | 6.594766 | -2.0        | 3.98E-02 | 8.22E-02 |
| 11 | let-7g(1)       | 0.530580               | 1.548657 | -2.9        | 1.68E-02 | 4.09E-02 |
| 12 | let-7gSTAR(1)   | 0.000713               | 0.001791 | -2.5        | 5.00E-02 | 9.99E-02 |
| 13 | let-7i(1)       | 0.805527               | 1.893000 | -2.3        | 1.41E-02 | 3.57E-02 |
| 14 | let-7iSTAR(1)   | 0.005936               | 0.015868 | -2.6        | 1.01E-02 | 2.78E-02 |
| 15 | miR-1(2)        | 0.180602               | 0.407418 | -2.3        | 1.28E-01 | 2.16E-01 |
| 16 | miR-100(1)      | 0.269461               | 1.357119 | -5.0        | 3.45E-04 | 1.58E-03 |
| 17 | miR-101-1STAR   | 0.006411               | 0.016112 | -2.5        | 6.04E-03 | 1.83E-02 |
| 18 | miR-101-2STAR   | 0.000092               | 0.000439 | -5.0        | 3.98E-02 | 8.22E-02 |
| 19 | miR-101(2)      | 0.504669               | 1.097522 | -2.2        | 7.18E-03 | 2.09E-02 |
| 20 | miR-103(2)      | 1.043406               | 1.739549 | -1.7        | 1.38E-01 | 2.29E-01 |
| 21 | miR-105(2)      | 0.000000               | 0.000053 | -13.4       | 1.19E-03 | 4.65E-03 |
| 22 | miR-106aSTAR    | 0.000211               | 0.000539 | -2.1        | 7.42E-02 | 1.37E-01 |
| 23 | miR-106bSTAR    | 0.010952               | 0.017509 | -1.6        | 1.40E-01 | 2.32E-01 |
| 24 | miR-107(1)      | 0.055739               | 0.107598 | -1.9        | 2.07E-02 | 4.86E-02 |
| 25 | miR-10bSTAR(1)  | 0.010470               | 0.016769 | -1.6        | 1.41E-01 | 2.32E-01 |
| 26 | miR-1180(1)     | 0.000461               | 0.002373 | -4.9        | 9.41E-06 | 7.22E-05 |
| 27 | miR-1185-1-3p   | 0.000511               | 0.001464 | -2.8        | 1.06E-01 | 1.85E-01 |
| 28 | miR-1185-5p(2)  | 0.000784               | 0.009892 | -12.0       | 3.35E-06 | 2.80E-05 |
| 29 | miR-1197(1)     | 0.000051               | 0.000141 | -2.0        | 1.10E-01 | 1.91E-01 |
| 30 | miR-122(1)      | 0.000012               | 0.000138 | -9.2        | 1.45E-03 | 5.59E-03 |

|    | A               | B        | C        | D     | E        | F        |
|----|-----------------|----------|----------|-------|----------|----------|
| 31 | miR-1226(1)     | 0.000130 | 0.000397 | -2.6  | 3.49E-02 | 7.42E-02 |
| 32 | miR-124(3)      | 0.000080 | 0.000618 | -6.9  | 1.05E-04 | 5.80E-04 |
| 33 | miR-1245-5p(1)  | 0.000017 | 0.000067 | -3.5  | 6.82E-02 | 1.27E-01 |
| 34 | miR-1247(1)     | 0.000803 | 0.004746 | -5.7  | 1.01E-03 | 4.02E-03 |
| 35 | miR-1249(1)     | 0.000113 | 0.000595 | -4.9  | 3.75E-02 | 7.88E-02 |
| 36 | miR-1252(1)     | 0.000002 | 0.000028 | -3.6  | 8.88E-02 | 1.61E-01 |
| 37 | miR-125a(1)     | 0.143980 | 0.274388 | -1.9  | 2.37E-02 | 5.47E-02 |
| 38 | miR-125b-1STA   | 0.003989 | 0.017534 | -4.4  | 3.74E-05 | 2.43E-04 |
| 39 | miR-125b-2STA   | 0.012877 | 0.048855 | -3.8  | 2.68E-05 | 1.76E-04 |
| 40 | miR-125b(2)     | 0.238119 | 1.442813 | -6.1  | 2.23E-08 | 3.64E-07 |
| 41 | miR-1264(1)     | 0.000000 | 0.000031 | -4.8  | 1.23E-01 | 2.10E-01 |
| 42 | miR-1269(1)     | 0.000940 | 0.000023 | 57.6  | 1.18E-03 | 4.63E-03 |
| 43 | miR-127(1)      | 0.071894 | 0.312605 | -4.3  | 1.04E-02 | 2.85E-02 |
| 44 | miR-1271(1)     | 0.002092 | 0.006362 | -3.0  | 1.54E-03 | 5.89E-03 |
| 45 | miR-1277-3p(1)  | 0.000113 | 0.003394 | -26.4 | 1.75E-04 | 9.13E-04 |
| 46 | miR-1277-5p(1)  | 0.000369 | 0.001050 | -2.7  | 1.19E-01 | 2.02E-01 |
| 47 | miR-128(2)      | 0.009958 | 0.023197 | -2.3  | 7.04E-03 | 2.06E-02 |
| 48 | miR-1283-1-3p   | 0.000399 | 0.000000 | 82.7  | 3.18E-06 | 2.70E-05 |
| 49 | miR-1283-2-3p   | 0.018071 | 0.000145 | 161.5 | 1.45E-06 | 1.42E-05 |
| 50 | miR-1283-5p(2)  | 0.108289 | 0.000257 | 556.9 | 5.19E-09 | 1.05E-07 |
| 51 | miR-1284-3p(1)  | 0.000000 | 0.000016 | -4.7  | 1.26E-01 | 2.13E-01 |
| 52 | miR-1286(1)     | 0.000000 | 0.000032 | -5.4  | 2.60E-02 | 5.79E-02 |
| 53 | miR-1287(1)     | 0.000708 | 0.001770 | -2.4  | 1.77E-02 | 4.28E-02 |
| 54 | miR-1287STAR    | 0.000175 | 0.000628 | -3.2  | 9.47E-02 | 1.69E-01 |
| 55 | miR-129-1-3p(1) | 0.000070 | 0.000325 | -4.8  | 7.89E-03 | 2.25E-02 |
| 56 | miR-129-2-3p(1) | 0.000365 | 0.001497 | -4.1  | 2.61E-02 | 5.79E-02 |
| 57 | miR-129-5p(2)   | 0.000149 | 0.000526 | -5.5  | 5.56E-04 | 2.40E-03 |
| 58 | miR-1294STAR    | 0.000110 | 0.000028 | 3.2   | 9.07E-02 | 1.63E-01 |
| 59 | miR-1296(1)     | 0.000755 | 0.001828 | -2.3  | 2.09E-02 | 4.90E-02 |
| 60 | miR-1298(1)     | 0.000000 | 0.000023 | -6.6  | 2.32E-02 | 5.37E-02 |

|    | A              | B        | C        | D      | E        | F        |
|----|----------------|----------|----------|--------|----------|----------|
| 61 | miR-1298STAR   | 0.000000 | 0.000023 | -6.1   | 2.87E-02 | 6.28E-02 |
| 62 | miR-1301(1)    | 0.001174 | 0.002428 | -2.0   | 4.03E-02 | 8.30E-02 |
| 63 | miR-1303(1)    | 0.000011 | 0.000172 | -8.2   | 1.15E-03 | 4.54E-03 |
| 64 | miR-1303STAR   | 0.000017 | 0.000099 | -3.9   | 1.25E-01 | 2.13E-01 |
| 65 | miR-1304STAR   | 0.000051 | 0.000241 | -4.0   | 7.46E-04 | 3.06E-03 |
| 66 | miR-1305(1)    | 0.000008 | 0.000062 | -4.3   | 1.13E-02 | 3.05E-02 |
| 67 | miR-1307-3p(1) | 0.005600 | 0.013433 | -2.4   | 2.98E-02 | 6.47E-02 |
| 68 | miR-1307-5p(1) | 0.003598 | 0.048654 | -13.3  | 9.41E-09 | 1.70E-07 |
| 69 | miR-130a(1)    | 0.220053 | 0.700227 | -3.2   | 2.15E-04 | 1.08E-03 |
| 70 | miR-130b(1)    | 0.018617 | 0.036762 | -2.0   | 2.20E-02 | 5.13E-02 |
| 71 | miR-130bSTAR   | 0.001138 | 0.002519 | -2.2   | 9.11E-03 | 2.54E-02 |
| 72 | miR-1323(1)    | 0.037381 | 0.000170 | 228.9  | 1.11E-06 | 1.13E-05 |
| 73 | miR-1323STAR   | 0.000924 | 0.000007 | 67.5   | 1.23E-04 | 6.67E-04 |
| 74 | miR-133aSTAR   | 0.001088 | 0.005114 | -4.4   | 3.49E-02 | 7.42E-02 |
| 75 | miR-134(1)     | 0.008427 | 0.022972 | -2.7   | 3.30E-03 | 1.11E-02 |
| 76 | miR-134STAR(1) | 0.000030 | 0.000291 | -6.3   | 2.20E-03 | 7.94E-03 |
| 77 | miR-135a-2STA  | 0.000000 | 0.000028 | -7.5   | 1.74E-02 | 4.22E-02 |
| 78 | miR-135a(2)    | 0.000035 | 0.000312 | -7.2   | 4.36E-05 | 2.73E-04 |
| 79 | miR-135b(1)    | 0.018389 | 0.004144 | -84.0  | 5.08E-10 | 1.88E-08 |
| 80 | miR-135bSTAR   | 0.000000 | 0.000182 | -38.1  | 5.16E-04 | 2.24E-03 |
| 81 | miR-136-5p(1)  | 0.011675 | 0.064905 | -5.5   | 7.57E-04 | 3.09E-03 |
| 82 | miR-137STAR(1) | 0.000008 | 0.000000 | 3.3    | 7.88E-02 | 1.45E-01 |
| 83 | miR-138-1STAR  | 0.000000 | 0.000135 | -26.7  | 1.49E-04 | 7.99E-04 |
| 84 | miR-138(2)     | 0.000249 | 0.006309 | -25.7  | 8.31E-11 | 4.71E-09 |
| 85 | miR-139(1)     | 0.010116 | 0.029298 | -2.9   | 8.29E-03 | 2.36E-02 |
| 86 | miR-139STAR(1) | 0.002832 | 0.005757 | -2.0   | 1.50E-01 | 2.43E-01 |
| 87 | miR-140(1)     | 0.688355 | 0.330303 | 2.1    | 3.59E-02 | 7.60E-02 |
| 88 | miR-141(1)     | 0.020189 | 2.157410 | -108.2 | 1.18E-07 | 1.62E-06 |
| 89 | miR-141STAR(1) | 0.000000 | 0.003210 | -642.4 | 5.56E-07 | 6.21E-06 |
| 90 | miR-142-3p(1)  | 0.040189 | 0.143444 | -3.6   | 2.20E-04 | 1.10E-03 |

|     | A              | B        | C        | D     | E        | F        |
|-----|----------------|----------|----------|-------|----------|----------|
| 91  | miR-142-5p(1)  | 0.330123 | 0.130366 | 2.5   | 5.09E-02 | 1.01E-01 |
| 92  | miR-146a(1)    | 0.070981 | 0.260436 | -3.7  | 4.58E-03 | 1.45E-02 |
| 93  | miR-146aSTAR   | 0.000324 | 0.001073 | -3.0  | 3.90E-02 | 8.08E-02 |
| 94  | miR-146b(1)    | 0.096902 | 0.230151 | -2.4  | 9.57E-03 | 2.66E-02 |
| 95  | miR-146bSTAR   | 0.000266 | 0.000851 | -3.0  | 1.48E-01 | 2.41E-01 |
| 96  | miR-147(1)     | 0.000219 | 0.001994 | -8.9  | 4.66E-03 | 1.46E-02 |
| 97  | miR-147STAR(1) | 0.000010 | 0.000069 | -3.5  | 4.29E-02 | 8.77E-02 |
| 98  | miR-148a(1)    | 0.698025 | 6.204235 | -8.9  | 5.75E-09 | 1.11E-07 |
| 99  | miR-148aSTAR   | 0.002595 | 0.012806 | -5.0  | 2.78E-06 | 2.44E-05 |
| 100 | miR-148b(1)    | 0.246108 | 0.583764 | -2.4  | 2.99E-03 | 1.02E-02 |
| 101 | miR-149(1)     | 0.000986 | 0.043176 | -42.5 | 9.28E-09 | 1.70E-07 |
| 102 | miR-150STAR(1) | 0.000117 | 0.000427 | -3.1  | 3.82E-02 | 7.96E-02 |
| 103 | miR-151-5p(1)  | 0.121662 | 0.193463 | -1.6  | 8.22E-02 | 1.51E-01 |
| 104 | miR-152(1)     | 0.274937 | 0.706678 | -2.6  | 2.34E-03 | 8.43E-03 |
| 105 | miR-152STAR(1) | 0.000068 | 0.000680 | -8.4  | 1.77E-04 | 9.20E-04 |
| 106 | miR-153-2STAR  | 0.000069 | 0.000302 | -4.3  | 4.05E-02 | 8.31E-02 |
| 107 | miR-1537(1)    | 0.000023 | 0.000157 | -4.0  | 2.99E-02 | 6.48E-02 |
| 108 | miR-154-3p(1)  | 0.000977 | 0.004008 | -3.9  | 2.70E-04 | 1.28E-03 |
| 109 | miR-154-5p(1)  | 0.000653 | 0.007471 | -10.5 | 3.99E-05 | 2.53E-04 |
| 110 | miR-155STAR(1) | 0.000009 | 0.000033 | -3.5  | 7.83E-02 | 1.44E-01 |
| 111 | miR-15b(1)     | 0.041065 | 0.083943 | -2.0  | 3.33E-02 | 7.17E-02 |
| 112 | miR-16(2)      | 0.972978 | 0.485645 | 2.0   | 1.39E-01 | 2.30E-01 |
| 113 | miR-17(1)      | 0.187841 | 0.426612 | -2.3  | 3.18E-03 | 1.09E-02 |
| 114 | miR-17STAR(1)  | 0.027161 | 0.089634 | -3.3  | 7.10E-05 | 4.19E-04 |
| 115 | miR-181a-2STA  | 0.005537 | 0.018239 | -3.3  | 1.26E-02 | 3.30E-02 |
| 116 | miR-181b-2STA  | 0.000080 | 0.000341 | -4.0  | 8.82E-03 | 2.47E-02 |
| 117 | miR-182(1)     | 0.007929 | 0.086833 | -10.9 | 1.20E-10 | 6.01E-09 |
| 118 | miR-182STAR(1) | 0.000000 | 0.000158 | -30.5 | 7.55E-05 | 4.40E-04 |
| 119 | miR-183(1)     | 0.003723 | 0.031322 | -8.5  | 1.61E-07 | 2.11E-06 |
| 120 | miR-183STAR(1) | 0.000012 | 0.000348 | -13.8 | 5.05E-06 | 4.05E-05 |

|     | A             | B        | C        | D      | E        | F        |
|-----|---------------|----------|----------|--------|----------|----------|
| 121 | miR-184(1)    | 0.000035 | 0.000294 | -6.6   | 7.29E-03 | 2.11E-02 |
| 122 | miR-185(1)    | 0.049971 | 0.106179 | -2.1   | 1.32E-02 | 3.39E-02 |
| 123 | miR-186(1)    | 0.179507 | 0.435912 | -2.4   | 4.52E-03 | 1.43E-02 |
| 124 | miR-186STAR(1 | 0.000328 | 0.001252 | -3.7   | 2.76E-03 | 9.77E-03 |
| 125 | miR-187(1)    | 0.000134 | 0.002871 | -34.8  | 1.52E-08 | 2.53E-07 |
| 126 | miR-187STAR(1 | 0.000000 | 0.000020 | -6.0   | 8.96E-02 | 1.62E-01 |
| 127 | miR-188(1)    | 0.002003 | 0.006137 | -3.0   | 4.15E-03 | 1.33E-02 |
| 128 | miR-18a(1)    | 0.015966 | 0.043217 | -2.7   | 1.22E-02 | 3.23E-02 |
| 129 | miR-18aSTAR(1 | 0.000332 | 0.001185 | -3.1   | 1.23E-03 | 4.77E-03 |
| 130 | miR-190a(1)   | 0.008079 | 0.038271 | -4.7   | 3.95E-05 | 2.52E-04 |
| 131 | miR-190aSTAR  | 0.000333 | 0.001285 | -3.6   | 1.85E-02 | 4.43E-02 |
| 132 | miR-190b(1)   | 0.000277 | 0.001023 | -3.5   | 5.08E-03 | 1.58E-02 |
| 133 | miR-1911(1)   | 0.000000 | 0.000009 | -3.0   | 1.15E-01 | 1.98E-01 |
| 134 | miR-192(1)    | 0.014213 | 0.033213 | -2.3   | 6.53E-03 | 1.95E-02 |
| 135 | miR-192STAR(1 | 0.000041 | 0.000145 | -3.4   | 6.68E-02 | 1.25E-01 |
| 136 | miR-193b(1)   | 0.017019 | 0.191975 | -11.2  | 1.90E-09 | 4.36E-08 |
| 137 | miR-193bSTAR  | 0.001615 | 0.006890 | -4.2   | 2.47E-05 | 1.66E-04 |
| 138 | miR-194-2STAR | 0.000014 | 0.000115 | -4.4   | 2.59E-02 | 5.79E-02 |
| 139 | miR-194(2)    | 0.007966 | 0.019662 | -2.5   | 8.69E-03 | 2.45E-02 |
| 140 | miR-195(1)    | 1.103442 | 0.280148 | 3.9    | 3.44E-02 | 7.35E-02 |
| 141 | miR-196a-2STA | 0.000374 | 0.010971 | -28.6  | 1.71E-05 | 1.22E-04 |
| 142 | miR-196a(2)   | 0.003928 | 0.128007 | -32.6  | 2.17E-04 | 1.08E-03 |
| 143 | miR-196b(1)   | 0.004936 | 0.084282 | -17.3  | 8.46E-04 | 3.41E-03 |
| 144 | miR-196bSTAR  | 0.000000 | 0.000848 | -169.3 | 3.93E-07 | 4.46E-06 |
| 145 | miR-199a-3p(3 | 1.430094 | 4.394329 | -3.1   | 8.15E-04 | 3.30E-03 |
| 146 | miR-199a-5p(2 | 0.243550 | 0.718565 | -2.9   | 4.65E-02 | 9.46E-02 |
| 147 | miR-199b-5p(1 | 0.090178 | 0.555891 | -6.2   | 6.93E-05 | 4.16E-04 |
| 148 | miR-19a(1)    | 0.037117 | 0.134484 | -3.6   | 8.05E-04 | 3.27E-03 |
| 149 | miR-19aSTAR(1 | 0.000025 | 0.000091 | -3.0   | 5.15E-02 | 1.02E-01 |
| 150 | miR-19b-1STAR | 0.001119 | 0.003227 | -2.9   | 1.70E-03 | 6.43E-03 |



|     | A             | B        | C        | D       | E        | F        |
|-----|---------------|----------|----------|---------|----------|----------|
| 151 | miR-19b(2)    | 0.324970 | 1.201096 | -3.7    | 3.77E-05 | 2.43E-04 |
| 152 | miR-200a(1)   | 0.001866 | 0.305010 | -191.6  | 2.88E-09 | 6.44E-08 |
| 153 | miR-200aSTAR  | 0.000008 | 0.002689 | -137.2  | 2.17E-07 | 2.71E-06 |
| 154 | miR-200b(1)   | 0.003060 | 0.425736 | -147.2  | 9.11E-11 | 4.84E-09 |
| 155 | miR-200bSTAR  | 0.000040 | 0.004212 | -191.2  | 2.84E-07 | 3.35E-06 |
| 156 | miR-200c(1)   | 0.004538 | 0.587965 | -135.7  | 1.56E-09 | 3.89E-08 |
| 157 | miR-200cSTAR  | 0.000000 | 0.001640 | -328.6  | 1.78E-07 | 2.29E-06 |
| 158 | miR-203(1)    | 0.013650 | 6.199758 | -461.0  | 1.69E-10 | 7.56E-09 |
| 159 | miR-203STAR(1 | 0.000137 | 0.084670 | -1474.1 | 4.18E-09 | 8.88E-08 |
| 160 | miR-205(1)    | 0.006298 | 2.430434 | -402.3  | 5.79E-10 | 1.97E-08 |
| 161 | miR-205STAR(1 | 0.000000 | 0.005473 | -1093.1 | 3.01E-06 | 2.59E-05 |
| 162 | miR-206(1)    | 0.011595 | 0.000164 | 76.0    | 2.58E-04 | 1.25E-03 |
| 163 | miR-208b(1)   | 0.004941 | 0.000067 | 74.8    | 2.57E-03 | 9.12E-03 |
| 164 | miR-20a(1)    | 0.047176 | 0.141330 | -3.0    | 2.86E-03 | 1.00E-02 |
| 165 | miR-20aSTAR(1 | 0.002872 | 0.007158 | -2.4    | 1.85E-02 | 4.43E-02 |
| 166 | miR-20bSTAR(1 | 0.000082 | 0.000283 | -3.0    | 5.92E-03 | 1.80E-02 |
| 167 | miR-210(1)    | 0.016008 | 0.525164 | -32.9   | 1.83E-10 | 7.75E-09 |
| 168 | miR-210STAR(1 | 0.000018 | 0.001696 | -54.3   | 7.20E-07 | 7.65E-06 |
| 169 | miR-211(1)    | 0.000109 | 0.034175 | -348.6  | 3.40E-12 | 4.76E-10 |
| 170 | miR-2110(1)   | 0.001484 | 0.004034 | -2.7    | 2.86E-03 | 1.00E-02 |
| 171 | miR-2110STAR  | 0.000054 | 0.000354 | -5.9    | 2.61E-02 | 5.79E-02 |
| 172 | miR-2114(1)   | 0.000027 | 0.000151 | -4.1    | 5.03E-02 | 1.00E-01 |
| 173 | miR-211STAR(1 | 0.000000 | 0.000284 | -56.6   | 5.85E-05 | 3.58E-04 |
| 174 | miR-212-3p(1) | 0.002601 | 0.000972 | 2.7     | 1.14E-02 | 3.05E-02 |
| 175 | miR-212-5p(1) | 0.001252 | 0.000483 | 2.6     | 1.51E-02 | 3.79E-02 |
| 176 | miR-214-5p(1) | 0.005329 | 0.016689 | -3.1    | 3.67E-04 | 1.66E-03 |
| 177 | miR-215(1)    | 0.002310 | 0.000782 | 3.1     | 1.06E-01 | 1.85E-01 |
| 178 | miR-216a(1)   | 0.000683 | 0.000261 | 2.9     | 3.49E-02 | 7.42E-02 |
| 179 | miR-218-2STAR | 0.000029 | 0.000188 | -4.7    | 7.26E-03 | 2.11E-02 |
| 180 | miR-218(2)    | 0.030998 | 0.112763 | -3.6    | 7.81E-05 | 4.48E-04 |

|     | A                | B        | C        | D     | E        | F        |
|-----|------------------|----------|----------|-------|----------|----------|
| 181 | miR-219-1-3p(1)  | 0.000043 | 0.000170 | -3.4  | 2.49E-02 | 5.62E-02 |
| 182 | miR-219-5p(2)    | 0.000164 | 0.001526 | -8.9  | 1.37E-02 | 3.50E-02 |
| 183 | miR-221(1)       | 0.089570 | 1.118186 | -12.5 | 4.73E-11 | 3.09E-09 |
| 184 | miR-221STAR(1)   | 0.004049 | 0.015258 | -3.7  | 2.17E-04 | 1.08E-03 |
| 185 | miR-222(1)       | 0.065040 | 0.460232 | -7.1  | 1.40E-10 | 6.61E-09 |
| 186 | miR-222STAR(1)   | 0.000478 | 0.001989 | -3.8  | 3.63E-02 | 7.63E-02 |
| 187 | miR-223STAR(1)   | 0.001387 | 0.000518 | 2.7   | 2.70E-02 | 5.97E-02 |
| 188 | miR-224(1)       | 0.008300 | 0.087400 | -10.5 | 3.86E-08 | 5.97E-07 |
| 189 | miR-224STAR(1)   | 0.000933 | 0.005748 | -5.9  | 9.82E-03 | 2.72E-02 |
| 190 | miR-2277-3p(1)   | 0.000010 | 0.000055 | -3.3  | 1.47E-01 | 2.40E-01 |
| 191 | miR-23a(1)       | 0.574681 | 1.752847 | -3.0  | 7.02E-04 | 2.94E-03 |
| 192 | miR-23b(1)       | 0.185790 | 1.110072 | -6.0  | 6.00E-08 | 8.95E-07 |
| 193 | miR-23bSTAR(1)   | 0.000697 | 0.002962 | -4.2  | 1.64E-02 | 4.03E-02 |
| 194 | miR-24-1STAR(1)  | 0.002739 | 0.010730 | -3.8  | 1.61E-02 | 3.96E-02 |
| 195 | miR-24-2STAR(1)  | 0.021646 | 0.039122 | -1.8  | 1.42E-01 | 2.32E-01 |
| 196 | miR-25(1)        | 0.132499 | 0.216665 | -1.6  | 6.10E-02 | 1.17E-01 |
| 197 | miR-26a-1STAR(1) | 0.000141 | 0.000717 | -4.7  | 2.40E-02 | 5.50E-02 |
| 198 | miR-26bSTAR(1)   | 0.001320 | 0.003454 | -2.6  | 9.98E-02 | 1.76E-01 |
| 199 | miR-27a(1)       | 0.490131 | 1.595913 | -3.3  | 2.06E-05 | 1.45E-04 |
| 200 | miR-27aSTAR(1)   | 0.004610 | 0.028133 | -6.0  | 9.73E-05 | 5.52E-04 |
| 201 | miR-27b(1)       | 0.559267 | 2.181145 | -3.9  | 5.79E-07 | 6.39E-06 |
| 202 | miR-27bSTAR(1)   | 0.003656 | 0.025288 | -6.9  | 2.11E-05 | 1.47E-04 |
| 203 | miR-28-3p(1)     | 0.046252 | 0.132554 | -2.9  | 2.38E-04 | 1.17E-03 |
| 204 | miR-28-5p(1)     | 0.053201 | 0.134892 | -2.5  | 1.25E-02 | 3.30E-02 |
| 205 | miR-296-3p(1)    | 0.000542 | 0.001093 | -1.9  | 8.95E-02 | 1.62E-01 |
| 206 | miR-296-5p(1)    | 0.000881 | 0.001884 | -2.1  | 4.15E-02 | 8.51E-02 |
| 207 | miR-299-3p(1)    | 0.000675 | 0.005897 | -8.1  | 1.58E-03 | 6.03E-03 |
| 208 | miR-299-5p(1)    | 0.006489 | 0.024095 | -3.7  | 3.78E-03 | 1.23E-02 |
| 209 | miR-29b-2STAR(1) | 0.000756 | 0.002771 | -3.5  | 4.70E-02 | 9.52E-02 |
| 210 | miR-29b(2)       | 0.047172 | 0.106145 | -2.2  | 1.34E-02 | 3.43E-02 |

|     | A              | B        | C        | D    | E        | F        |
|-----|----------------|----------|----------|------|----------|----------|
| 211 | miR-29c(1)     | 0.046826 | 0.110747 | -2.4 | 3.79E-02 | 7.93E-02 |
| 212 | miR-29cSTAR(1) | 0.003358 | 0.007987 | -2.3 | 1.05E-01 | 1.84E-01 |
| 213 | miR-301b(1)    | 0.001788 | 0.003387 | -1.9 | 6.61E-02 | 1.24E-01 |
| 214 | miR-3064-5p(1) | 0.000067 | 0.000247 | -3.0 | 1.47E-01 | 2.40E-01 |
| 215 | miR-3065-3p(1) | 0.000034 | 0.000265 | -6.8 | 1.31E-02 | 3.39E-02 |
| 216 | miR-3065-5p(1) | 0.000222 | 0.001021 | -4.1 | 1.09E-02 | 2.97E-02 |
| 217 | miR-30a(1)     | 1.741285 | 0.577132 | 3.0  | 2.88E-03 | 1.00E-02 |
| 218 | miR-30aSTAR(1) | 0.237320 | 0.117600 | 2.0  | 1.17E-02 | 3.14E-02 |
| 219 | miR-30b(1)     | 0.188736 | 0.361902 | -1.9 | 3.84E-02 | 7.97E-02 |
| 220 | miR-30c-1STAR  | 0.001263 | 0.003174 | -2.5 | 5.37E-03 | 1.65E-02 |
| 221 | miR-30dSTAR(1) | 0.003905 | 0.006134 | -1.6 | 1.27E-01 | 2.14E-01 |
| 222 | miR-30eSTAR(1) | 0.086269 | 0.199059 | -2.3 | 4.10E-04 | 1.80E-03 |
| 223 | miR-31-5p(1)   | 0.000258 | 0.000859 | -4.3 | 6.19E-03 | 1.87E-02 |
| 224 | miR-3117(1)    | 0.000017 | 0.000101 | -4.1 | 9.09E-02 | 1.63E-01 |
| 225 | miR-3120(1)    | 0.000033 | 0.000000 | 6.3  | 1.29E-02 | 3.37E-02 |
| 226 | miR-3130-3p(1) | 0.000010 | 0.000059 | -3.4 | 1.34E-01 | 2.24E-01 |
| 227 | miR-3130-5p(1) | 0.000025 | 0.000165 | -5.6 | 3.14E-02 | 6.77E-02 |
| 228 | miR-3136(1)    | 0.000012 | 0.000135 | -8.1 | 2.45E-03 | 8.78E-03 |
| 229 | miR-3145-3p(1) | 0.000008 | 0.000052 | -3.7 | 5.63E-02 | 1.10E-01 |
| 230 | miR-3152(1)    | 0.000002 | 0.000021 | -3.1 | 9.36E-02 | 1.67E-01 |
| 231 | miR-3158STAR   | 0.000012 | 0.000072 | -4.5 | 1.14E-01 | 1.97E-01 |
| 232 | miR-3177(1)    | 0.000015 | 0.000065 | -3.7 | 6.91E-02 | 1.29E-01 |
| 233 | miR-32(1)      | 0.009350 | 0.022541 | -2.4 | 5.78E-02 | 1.12E-01 |
| 234 | miR-320(1)     | 0.458900 | 0.935921 | -2.0 | 6.36E-03 | 1.92E-02 |
| 235 | miR-3200(1)    | 0.000148 | 0.000689 | -4.1 | 5.72E-04 | 2.45E-03 |
| 236 | miR-323a(1)    | 0.000661 | 0.002540 | -3.6 | 3.39E-02 | 7.27E-02 |
| 237 | miR-323b(1)    | 0.000157 | 0.000613 | -3.6 | 1.20E-02 | 3.21E-02 |
| 238 | miR-323bSTAR   | 0.000066 | 0.000648 | -7.4 | 2.06E-04 | 1.05E-03 |
| 239 | miR-324-3p(1)  | 0.005130 | 0.020069 | -3.9 | 3.63E-04 | 1.65E-03 |
| 240 | miR-324-5p(1)  | 0.007731 | 0.043546 | -5.6 | 2.89E-05 | 1.89E-04 |

|     | A              | B        | C        | D     | E        | F        |
|-----|----------------|----------|----------|-------|----------|----------|
| 241 | miR-328(1)     | 0.003123 | 0.006316 | -2.0  | 7.00E-02 | 1.30E-01 |
| 242 | miR-329(2)     | 0.002014 | 0.005049 | -2.4  | 1.30E-02 | 3.38E-02 |
| 243 | miR-329STAR(2) | 0.000023 | 0.000139 | -4.4  | 7.12E-03 | 2.08E-02 |
| 244 | miR-32STAR(1)  | 0.000356 | 0.001283 | -3.5  | 1.54E-02 | 3.82E-02 |
| 245 | miR-330(1)     | 0.015515 | 0.009389 | 1.7   | 7.04E-02 | 1.30E-01 |
| 246 | miR-330STAR(1) | 0.000656 | 0.001091 | -1.6  | 8.57E-02 | 1.56E-01 |
| 247 | miR-331(1)     | 0.010224 | 0.025131 | -2.4  | 4.36E-03 | 1.39E-02 |
| 248 | miR-331STAR(1) | 0.000752 | 0.002426 | -3.0  | 1.85E-03 | 6.86E-03 |
| 249 | miR-337(1)     | 0.004208 | 0.018210 | -4.3  | 1.81E-03 | 6.76E-03 |
| 250 | miR-338-3p(1)  | 0.002826 | 0.048033 | -16.7 | 1.90E-07 | 2.41E-06 |
| 251 | miR-338-5p(1)  | 0.001102 | 0.009415 | -8.3  | 2.67E-04 | 1.28E-03 |
| 252 | miR-339-5p(1)  | 0.004093 | 0.008251 | -2.0  | 2.03E-02 | 4.82E-02 |
| 253 | miR-33a(1)     | 0.002060 | 0.036658 | -17.4 | 6.61E-10 | 2.16E-08 |
| 254 | miR-33aSTAR(1) | 0.000439 | 0.003343 | -6.9  | 6.94E-05 | 4.16E-04 |
| 255 | miR-33b(1)     | 0.000830 | 0.006140 | -6.9  | 9.22E-04 | 3.70E-03 |
| 256 | miR-33bSTAR(1) | 0.000010 | 0.000303 | -14.2 | 7.12E-04 | 2.97E-03 |
| 257 | miR-340(1)     | 0.038191 | 0.002997 | 12.8  | 4.22E-03 | 1.35E-02 |
| 258 | miR-342(1)     | 0.045020 | 0.084378 | -1.9  | 5.87E-03 | 1.79E-02 |
| 259 | miR-345(1)     | 0.004768 | 0.016249 | -3.4  | 1.52E-05 | 1.12E-04 |
| 260 | miR-34a(1)     | 0.030882 | 0.050530 | -1.6  | 5.64E-02 | 1.10E-01 |
| 261 | miR-34b(1)     | 0.000245 | 0.000970 | -3.5  | 6.26E-02 | 1.20E-01 |
| 262 | miR-361-3p(1)  | 0.008696 | 0.015206 | -1.7  | 2.89E-02 | 6.29E-02 |
| 263 | miR-361-5p(1)  | 0.024989 | 0.042867 | -1.7  | 1.42E-01 | 2.33E-01 |
| 264 | miR-3617(1)    | 0.000202 | 0.000520 | -3.5  | 1.26E-01 | 2.13E-01 |
| 265 | miR-362-3p(1)  | 0.002930 | 0.010505 | -3.5  | 6.78E-03 | 2.01E-02 |
| 266 | miR-362-5p(1)  | 0.011008 | 0.026941 | -2.4  | 6.81E-03 | 2.02E-02 |
| 267 | miR-363(1)     | 0.013924 | 0.037352 | -2.7  | 2.10E-04 | 1.07E-03 |
| 268 | miR-363STAR(1) | 0.000031 | 0.000080 | -2.7  | 6.34E-02 | 1.21E-01 |
| 269 | miR-365-1STAR  | 0.000055 | 0.000652 | -9.2  | 3.68E-03 | 1.20E-02 |
| 270 | miR-365(2)     | 0.018809 | 0.075080 | -4.0  | 2.97E-03 | 1.02E-02 |

|     | A              | B        | C        | D     | E        | F        |
|-----|----------------|----------|----------|-------|----------|----------|
| 271 | miR-3657(1)    | 0.000007 | 0.000047 | -3.6  | 6.07E-02 | 1.17E-01 |
| 272 | miR-3659(1)    | 0.000016 | 0.001347 | -39.7 | 8.36E-06 | 6.52E-05 |
| 273 | miR-3664-3p(1) | 0.000000 | 0.000063 | -13.5 | 2.25E-02 | 5.25E-02 |
| 274 | miR-3677-5p(1) | 0.000002 | 0.000034 | -4.4  | 1.03E-01 | 1.81E-01 |
| 275 | miR-369(1)     | 0.014603 | 0.038361 | -2.6  | 6.93E-03 | 2.04E-02 |
| 276 | miR-369STAR(1) | 0.000875 | 0.003531 | -3.8  | 6.51E-03 | 1.95E-02 |
| 277 | miR-370(1)     | 0.003571 | 0.010611 | -2.9  | 1.49E-02 | 3.76E-02 |
| 278 | miR-370STAR(1) | 0.000172 | 0.000643 | -3.3  | 3.61E-03 | 1.19E-02 |
| 279 | miR-371(1)     | 0.004970 | 0.000048 | 78.9  | 6.84E-06 | 5.43E-05 |
| 280 | miR-371STAR(1) | 0.000348 | 0.000009 | 21.0  | 3.24E-03 | 1.10E-02 |
| 281 | miR-372(1)     | 0.018904 | 0.000242 | 73.0  | 4.56E-06 | 3.69E-05 |
| 282 | miR-373(1)     | 0.007085 | 0.000087 | 66.6  | 8.62E-07 | 8.94E-06 |
| 283 | miR-373STAR(1) | 0.000063 | 0.000003 | 8.1   | 4.83E-02 | 9.69E-02 |
| 284 | miR-375(1)     | 0.000212 | 0.008830 | -68.4 | 1.10E-07 | 1.53E-06 |
| 285 | miR-376a-1-5p  | 0.001587 | 0.006708 | -4.1  | 6.71E-04 | 2.84E-03 |
| 286 | miR-376a-2-5p  | 0.000612 | 0.003961 | -6.0  | 2.63E-04 | 1.27E-03 |
| 287 | miR-376a-3p(2) | 0.003583 | 0.011717 | -3.2  | 1.21E-02 | 3.22E-02 |
| 288 | miR-376a-A6G-  | 0.025540 | 0.140231 | -5.5  | 1.28E-02 | 3.35E-02 |
| 289 | miR-376b(1)    | 0.002957 | 0.033557 | -11.2 | 1.59E-05 | 1.15E-04 |
| 290 | miR-376bSTAR   | 0.000597 | 0.003442 | -5.3  | 1.16E-04 | 6.30E-04 |
| 291 | miR-376c(1)    | 0.113409 | 0.403952 | -3.6  | 1.54E-02 | 3.82E-02 |
| 292 | miR-376cSTAR   | 0.000696 | 0.003720 | -5.0  | 9.96E-05 | 5.57E-04 |
| 293 | miR-378(1)     | 2.473134 | 1.254631 | 2.0   | 1.52E-02 | 3.79E-02 |
| 294 | miR-379(1)     | 0.011707 | 0.044907 | -3.8  | 1.38E-03 | 5.34E-03 |
| 295 | miR-380-3p(1)  | 0.000165 | 0.000465 | -2.8  | 4.80E-02 | 9.69E-02 |
| 296 | miR-380-5p(1)  | 0.000145 | 0.000486 | -3.1  | 1.38E-02 | 3.52E-02 |
| 297 | miR-381STAR(1) | 0.000159 | 0.001014 | -5.4  | 7.46E-03 | 2.14E-02 |
| 298 | miR-382-3p(1)  | 0.002494 | 0.010060 | -3.9  | 2.13E-03 | 7.85E-03 |
| 299 | miR-382-5p(1)  | 0.007181 | 0.022146 | -3.1  | 1.49E-02 | 3.76E-02 |
| 300 | miR-383(1)     | 0.000002 | 0.000330 | -33.5 | 1.90E-05 | 1.35E-04 |

|     | A              | B        | C        | D      | E        | F        |
|-----|----------------|----------|----------|--------|----------|----------|
| 301 | miR-3910(1)    | 0.000049 | 0.000902 | -15.3  | 2.64E-04 | 1.27E-03 |
| 302 | miR-3912(1)    | 0.000158 | 0.000587 | -3.5   | 9.32E-02 | 1.67E-01 |
| 303 | miR-3919-3p(1) | 0.000000 | 0.000007 | -2.7   | 1.15E-01 | 1.98E-01 |
| 304 | miR-3934(1)    | 0.000122 | 0.000439 | -3.1   | 2.44E-02 | 5.55E-02 |
| 305 | miR-3940(1)    | 0.000033 | 0.000143 | -3.0   | 1.30E-01 | 2.19E-01 |
| 306 | miR-409-3p(1)  | 0.009597 | 0.039162 | -4.0   | 2.76E-02 | 6.06E-02 |
| 307 | miR-409-5p(1)  | 0.001560 | 0.008299 | -5.1   | 1.55E-04 | 8.23E-04 |
| 308 | miR-411(1)     | 0.015467 | 0.032912 | -2.1   | 1.36E-01 | 2.26E-01 |
| 309 | miR-412(1)     | 0.000350 | 0.001327 | -3.4   | 2.40E-02 | 5.50E-02 |
| 310 | miR-423-3p(1)  | 0.062630 | 0.242042 | -3.9   | 2.49E-05 | 1.66E-04 |
| 311 | miR-423-5p(1)  | 0.022326 | 0.057746 | -2.6   | 4.02E-03 | 1.29E-02 |
| 312 | miR-425(1)     | 0.054334 | 0.101433 | -1.9   | 1.67E-02 | 4.08E-02 |
| 313 | miR-425STAR(1) | 0.002932 | 0.010742 | -3.6   | 2.45E-04 | 1.19E-03 |
| 314 | miR-429(1)     | 0.000244 | 0.040148 | -229.6 | 2.78E-12 | 4.72E-10 |
| 315 | miR-429STAR(1) | 0.000036 | 0.000130 | -10.9  | 5.21E-03 | 1.61E-02 |
| 316 | miR-431-3p(1)  | 0.000408 | 0.001099 | -2.6   | 1.28E-02 | 3.35E-02 |
| 317 | miR-431-5p(1)  | 0.007376 | 0.003195 | 2.3    | 7.42E-03 | 2.14E-02 |
| 318 | miR-432(1)     | 0.002613 | 0.007788 | -2.9   | 3.59E-03 | 1.18E-02 |
| 319 | miR-4326(1)    | 0.000099 | 0.000296 | -2.7   | 1.15E-01 | 1.98E-01 |
| 320 | miR-432STAR(1) | 0.000052 | 0.000187 | -3.4   | 5.36E-02 | 1.06E-01 |
| 321 | miR-433(1)     | 0.000823 | 0.003524 | -4.1   | 3.31E-03 | 1.11E-02 |
| 322 | miR-433STAR(1) | 0.000066 | 0.000288 | -3.5   | 2.51E-02 | 5.64E-02 |
| 323 | miR-449a(1)    | 0.000080 | 0.000257 | -2.8   | 8.03E-02 | 1.47E-01 |
| 324 | miR-450a-1STA  | 0.000313 | 0.002140 | -6.0   | 2.16E-03 | 7.88E-03 |
| 325 | miR-450a-2STA  | 0.000411 | 0.001245 | -3.0   | 1.15E-01 | 1.98E-01 |
| 326 | miR-450a(2)    | 0.004915 | 0.035589 | -7.1   | 1.58E-04 | 8.33E-04 |
| 327 | miR-450b(1)    | 0.008443 | 0.019722 | -2.3   | 2.82E-02 | 6.18E-02 |
| 328 | miR-450bSTAR   | 0.000033 | 0.000199 | -4.7   | 1.99E-02 | 4.72E-02 |
| 329 | miR-452(1)     | 0.022441 | 0.083638 | -3.7   | 3.01E-06 | 2.59E-05 |
| 330 | miR-452STAR(1) | 0.004809 | 0.013916 | -2.9   | 2.18E-03 | 7.93E-03 |

|     | A              | B        | C        | D     | E        | F        |
|-----|----------------|----------|----------|-------|----------|----------|
| 331 | miR-454(1)     | 0.003674 | 0.008294 | -2.2  | 1.76E-02 | 4.26E-02 |
| 332 | miR-455-3p(1)  | 0.014015 | 0.103256 | -7.4  | 3.48E-07 | 4.05E-06 |
| 333 | miR-455-5p(1)  | 0.001835 | 0.027205 | -14.5 | 1.20E-07 | 1.62E-06 |
| 334 | miR-4690(1)    | 0.000034 | 0.000130 | -2.6  | 8.61E-02 | 1.56E-01 |
| 335 | miR-4705(1)    | 0.000018 | 0.000115 | -3.9  | 2.74E-02 | 6.04E-02 |
| 336 | miR-4725-3p(1) | 0.000047 | 0.000006 | 3.8   | 9.71E-02 | 1.72E-01 |
| 337 | miR-4789-3p(1) | 0.000000 | 0.000082 | -18.7 | 2.16E-03 | 7.88E-03 |
| 338 | miR-484(1)     | 0.010979 | 0.021025 | -1.9  | 2.40E-02 | 5.50E-02 |
| 339 | miR-485-3p(1)  | 0.000537 | 0.001218 | -2.1  | 5.52E-02 | 1.08E-01 |
| 340 | miR-485-5p(1)  | 0.000980 | 0.005173 | -5.1  | 7.55E-03 | 2.16E-02 |
| 341 | miR-487a-5p(1) | 0.000250 | 0.001042 | -3.6  | 2.53E-02 | 5.67E-02 |
| 342 | miR-487b(1)    | 0.007063 | 0.028308 | -4.0  | 7.19E-04 | 2.98E-03 |
| 343 | miR-488(1)     | 0.001064 | 0.005602 | -5.0  | 3.50E-03 | 1.16E-02 |
| 344 | miR-489(1)     | 0.001130 | 0.000312 | 4.0   | 5.62E-02 | 1.10E-01 |
| 345 | miR-491(1)     | 0.001036 | 0.002142 | -1.9  | 1.33E-01 | 2.22E-01 |
| 346 | miR-493-3p(1)  | 0.002573 | 0.009495 | -3.6  | 2.90E-03 | 1.01E-02 |
| 347 | miR-493-5p(1)  | 0.005541 | 0.014231 | -2.5  | 3.60E-02 | 7.60E-02 |
| 348 | miR-494(1)     | 0.004757 | 0.018462 | -3.8  | 2.41E-02 | 5.51E-02 |
| 349 | miR-494STAR(1) | 0.000020 | 0.000079 | -2.5  | 1.37E-01 | 2.28E-01 |
| 350 | miR-495STAR(1) | 0.000123 | 0.000326 | -2.3  | 9.49E-02 | 1.69E-01 |
| 351 | miR-496(1)     | 0.000292 | 0.000675 | -2.4  | 5.06E-02 | 1.01E-01 |
| 352 | miR-498(1)     | 0.013447 | 0.000034 | 309.6 | 4.08E-09 | 8.88E-08 |
| 353 | miR-498STAR(1) | 0.004329 | 0.000003 | 451.1 | 1.23E-07 | 1.63E-06 |
| 354 | miR-500-5p(2)  | 0.001025 | 0.003151 | -2.9  | 1.47E-02 | 3.73E-02 |
| 355 | miR-501-5p(1)  | 0.001300 | 0.002306 | -1.7  | 1.11E-01 | 1.91E-01 |
| 356 | miR-502(1)     | 0.012863 | 0.021575 | -1.7  | 6.31E-02 | 1.20E-01 |
| 357 | miR-505(1)     | 0.005821 | 0.009375 | -1.6  | 1.40E-01 | 2.32E-01 |
| 358 | miR-505STAR(1) | 0.000206 | 0.000500 | -2.1  | 5.45E-02 | 1.07E-01 |
| 359 | miR-506(1)     | 0.000023 | 0.001591 | -45.6 | 1.68E-06 | 1.57E-05 |
| 360 | miR-508(1)     | 0.000217 | 0.013871 | -82.8 | 3.92E-07 | 4.46E-06 |

|     | A              | B        | C        | D      | E        | F        |
|-----|----------------|----------|----------|--------|----------|----------|
| 361 | miR-508STAR(1  | 0.000000 | 0.000146 | -30.3  | 6.78E-03 | 2.01E-02 |
| 362 | miR-509-3-5p(1 | 0.000038 | 0.000731 | -17.7  | 2.27E-04 | 1.12E-03 |
| 363 | miR-509-3p(3)  | 0.000039 | 0.016208 | -291.1 | 6.26E-07 | 6.82E-06 |
| 364 | miR-509-5p(2)  | 0.000002 | 0.000330 | -33.3  | 1.04E-03 | 4.14E-03 |
| 365 | miR-510-3p(1)  | 0.000000 | 0.000193 | -40.8  | 7.02E-04 | 2.94E-03 |
| 366 | miR-510-5p(1)  | 0.000000 | 0.000184 | -35.3  | 2.82E-04 | 1.33E-03 |
| 367 | miR-512-3p(2)  | 0.145868 | 0.000636 | 236.1  | 6.00E-13 | 1.51E-10 |
| 368 | miR-512-5p(2)  | 0.023110 | 0.000195 | 116.8  | 4.50E-09 | 9.34E-08 |
| 369 | miR-513a-3p(2) | 0.000004 | 0.000764 | -55.8  | 1.95E-04 | 1.01E-03 |
| 370 | miR-513a-5p(2) | 0.000006 | 0.000784 | -53.0  | 2.02E-06 | 1.87E-05 |
| 371 | miR-513b(1)    | 0.000010 | 0.000703 | -59.2  | 1.42E-05 | 1.06E-04 |
| 372 | miR-513c-3p(1) | 0.000004 | 0.000731 | -53.4  | 2.76E-06 | 2.44E-05 |
| 373 | miR-513c-5p(1) | 0.000004 | 0.000757 | -55.8  | 1.59E-05 | 1.15E-04 |
| 374 | miR-514a(3)    | 0.000504 | 0.043465 | -80.8  | 1.61E-06 | 1.54E-05 |
| 375 | miR-514aSTAR   | 0.000012 | 0.002487 | -101.7 | 2.28E-05 | 1.57E-04 |
| 376 | miR-514b-3p(1) | 0.000004 | 0.000564 | -41.6  | 9.43E-06 | 7.22E-05 |
| 377 | miR-514b-5p(1) | 0.000000 | 0.000323 | -67.7  | 3.10E-04 | 1.45E-03 |
| 378 | miR-515(2)     | 0.828497 | 0.001635 | 517.4  | 5.32E-09 | 1.05E-07 |
| 379 | miR-515STAR(2  | 0.177570 | 0.000669 | 274.2  | 7.83E-07 | 8.22E-06 |
| 380 | miR-516a(2)    | 0.614098 | 0.003878 | 159.5  | 1.24E-08 | 2.16E-07 |
| 381 | miR-516b(2)    | 0.587285 | 0.001621 | 370.5  | 6.77E-08 | 9.76E-07 |
| 382 | miR-516STAR(4  | 0.018389 | 0.000057 | 330.1  | 4.22E-10 | 1.63E-08 |
| 383 | miR-517a(2)    | 0.540540 | 0.002021 | 275.3  | 1.16E-11 | 9.82E-10 |
| 384 | miR-517b(1)    | 0.090358 | 0.000318 | 308.5  | 1.81E-11 | 1.40E-09 |
| 385 | miR-517STAR(3  | 0.012707 | 0.000051 | 414.1  | 1.60E-06 | 1.54E-05 |
| 386 | miR-518a-1-3p  | 0.094821 | 0.000337 | 341.2  | 2.30E-07 | 2.80E-06 |
| 387 | miR-518a-2-3p  | 0.094821 | 0.000337 | 341.2  | 2.30E-07 | 2.80E-06 |
| 388 | miR-518a-5p(3) | 0.098978 | 0.001947 | 51.9   | 7.75E-06 | 6.10E-05 |
| 389 | miR-518b-3p(1) | 0.297708 | 0.000841 | 368.8  | 1.39E-14 | 1.18E-11 |
| 390 | miR-518b-5p(1) | 0.001451 | 0.000007 | 104.5  | 5.54E-05 | 3.41E-04 |



|     | A              | B        | C        | D     | E        | F        |
|-----|----------------|----------|----------|-------|----------|----------|
| 391 | miR-518c-3p(1) | 0.525212 | 0.001287 | 422.2 | 1.01E-11 | 9.53E-10 |
| 392 | miR-518c-5p(1) | 0.005249 | 0.000063 | 105.9 | 3.47E-06 | 2.86E-05 |
| 393 | miR-518d-3p(1) | 0.004394 | 0.000019 | 145.7 | 7.08E-07 | 7.62E-06 |
| 394 | miR-518d-5p(5) | 0.015840 | 0.000157 | 103.3 | 1.13E-06 | 1.13E-05 |
| 395 | miR-518e-3p(1) | 0.386865 | 0.000881 | 460.9 | 1.83E-09 | 4.31E-08 |
| 396 | miR-518e-5p(5) | 0.077066 | 0.000206 | 397.6 | 6.66E-09 | 1.26E-07 |
| 397 | miR-518f-3p(1) | 0.113895 | 0.000290 | 400.5 | 7.13E-13 | 1.51E-10 |
| 398 | miR-519a-1-5p  | 0.035542 | 0.000099 | 390.3 | 3.27E-11 | 2.32E-09 |
| 399 | miR-519a-2-5p  | 0.046181 | 0.000121 | 454.6 | 3.08E-08 | 4.94E-07 |
| 400 | miR-519a-3p(2) | 0.277172 | 0.001375 | 207.8 | 1.43E-09 | 3.80E-08 |
| 401 | miR-519b-3p(1) | 0.024961 | 0.000281 | 89.9  | 1.70E-09 | 4.13E-08 |
| 402 | miR-519c-3p(1) | 0.016985 | 0.000087 | 217.2 | 1.28E-09 | 3.52E-08 |
| 403 | miR-519d(1)    | 0.113205 | 0.000522 | 227.9 | 1.75E-13 | 7.43E-11 |
| 404 | miR-519dSTAR   | 0.005320 | 0.000008 | 364.3 | 1.37E-08 | 2.33E-07 |
| 405 | miR-519e-3p(1) | 0.005553 | 0.000015 | 242.1 | 9.31E-07 | 9.54E-06 |
| 406 | miR-519e-5p(1) | 0.035445 | 0.000103 | 319.4 | 1.43E-06 | 1.42E-05 |
| 407 | miR-520a-3p(1) | 0.037570 | 0.000131 | 362.3 | 6.16E-11 | 3.74E-09 |
| 408 | miR-520a-5p(1) | 0.013987 | 0.000300 | 50.7  | 1.67E-06 | 1.57E-05 |
| 409 | miR-520b-3p(2) | 0.020944 | 0.000257 | 90.3  | 1.01E-09 | 3.17E-08 |
| 410 | miR-520d-3p(1) | 0.049998 | 0.000202 | 285.6 | 1.16E-09 | 3.52E-08 |
| 411 | miR-520d-5p(1) | 0.044015 | 0.000638 | 74.9  | 2.42E-07 | 2.90E-06 |
| 412 | miR-520e-3p(1) | 0.001374 | 0.000015 | 68.2  | 4.21E-06 | 3.44E-05 |
| 413 | miR-520e-5p(1) | 0.000299 | 0.000000 | 62.5  | 2.71E-04 | 1.28E-03 |
| 414 | miR-520f-3p(1) | 0.023177 | 0.000158 | 154.6 | 1.27E-09 | 3.52E-08 |
| 415 | miR-520f-5p(1) | 0.001438 | 0.000020 | 126.3 | 7.94E-05 | 4.53E-04 |
| 416 | miR-520g-3p(2) | 0.117505 | 0.000633 | 202.8 | 6.64E-12 | 7.06E-10 |
| 417 | miR-520g-5p(2) | 0.001721 | 0.000000 | 348.1 | 2.49E-05 | 1.66E-04 |
| 418 | miR-521-1STAR  | 0.002995 | 0.000012 | 159.9 | 3.28E-06 | 2.76E-05 |
| 419 | miR-521-2STAR  | 0.000067 | 0.000000 | 17.8  | 2.09E-02 | 4.90E-02 |
| 420 | miR-521(2)     | 0.101857 | 0.000208 | 583.9 | 1.51E-09 | 3.89E-08 |

|     | A                | B        | C        | D     | E        | F        |
|-----|------------------|----------|----------|-------|----------|----------|
| 421 | miR-522-3p(1)    | 0.048030 | 0.000180 | 342.6 | 3.92E-12 | 4.76E-10 |
| 422 | miR-523-3p(1)    | 0.020857 | 0.000095 | 233.9 | 1.23E-09 | 3.52E-08 |
| 423 | miR-524(1)       | 0.078203 | 0.000567 | 151.4 | 3.41E-08 | 5.36E-07 |
| 424 | miR-524STAR(1)   | 0.015339 | 0.000064 | 236.8 | 1.18E-08 | 2.09E-07 |
| 425 | miR-525-3p(1)    | 0.046746 | 0.000250 | 216.1 | 4.79E-08 | 7.27E-07 |
| 426 | miR-525-5p(1)    | 0.047838 | 0.000116 | 396.7 | 1.91E-10 | 7.75E-09 |
| 427 | miR-526a-1-3p(1) | 0.002365 | 0.000026 | 137.8 | 2.29E-05 | 1.57E-04 |
| 428 | miR-526b-3p(1)   | 0.018659 | 0.000168 | 118.9 | 9.06E-08 | 1.28E-06 |
| 429 | miR-526b-5p(1)   | 0.043166 | 0.000218 | 207.9 | 5.36E-10 | 1.90E-08 |
| 430 | miR-527STAR(1)   | 0.006394 | 0.000118 | 58.3  | 5.96E-04 | 2.54E-03 |
| 431 | miR-532-3p(1)    | 0.010669 | 0.021982 | -2.1  | 1.67E-02 | 4.08E-02 |
| 432 | miR-532-5p(1)    | 0.012820 | 0.050390 | -3.9  | 1.19E-05 | 8.94E-05 |
| 433 | miR-539(1)       | 0.001619 | 0.005899 | -3.5  | 3.87E-03 | 1.25E-02 |
| 434 | miR-539STAR(1)   | 0.000412 | 0.001086 | -2.6  | 1.31E-02 | 3.39E-02 |
| 435 | miR-542(1)       | 0.021646 | 0.117700 | -5.4  | 3.81E-04 | 1.71E-03 |
| 436 | miR-542STAR(1)   | 0.001098 | 0.005009 | -4.4  | 1.02E-02 | 2.81E-02 |
| 437 | miR-543STAR(1)   | 0.000188 | 0.000405 | -2.1  | 1.09E-01 | 1.89E-01 |
| 438 | miR-544-3p(1)    | 0.000126 | 0.000345 | -2.8  | 1.05E-01 | 1.84E-01 |
| 439 | miR-544-5p(1)    | 0.000081 | 0.000534 | -4.9  | 5.72E-03 | 1.75E-02 |
| 440 | miR-545-5p(1)    | 0.000220 | 0.000553 | -2.3  | 1.16E-01 | 1.98E-01 |
| 441 | miR-548b(1)      | 0.000114 | 0.000534 | -5.3  | 3.33E-04 | 1.54E-03 |
| 442 | miR-548e(1)      | 0.000643 | 0.001281 | -1.9  | 5.67E-02 | 1.10E-01 |
| 443 | miR-551a(1)      | 0.000043 | 0.000402 | -6.8  | 3.81E-04 | 1.71E-03 |
| 444 | miR-552-3p(1)    | 0.000185 | 0.000033 | 4.9   | 8.30E-02 | 1.52E-01 |
| 445 | miR-556-3p(1)    | 0.000008 | 0.000097 | -4.8  | 1.10E-01 | 1.91E-01 |
| 446 | miR-556-5p(1)    | 0.000046 | 0.000231 | -5.5  | 5.30E-02 | 1.05E-01 |
| 447 | miR-561(1)       | 0.000034 | 0.000444 | -11.2 | 9.88E-05 | 5.56E-04 |
| 448 | miR-561STAR(1)   | 0.000038 | 0.000096 | -6.3  | 2.06E-02 | 4.85E-02 |
| 449 | miR-570-5p(1)    | 0.000090 | 0.000348 | -4.3  | 1.38E-02 | 3.51E-02 |
| 450 | miR-574-3p(1)    | 0.018065 | 0.087547 | -4.8  | 2.52E-06 | 2.25E-05 |

|     | A              | B        | C        | D     | E        | F        |
|-----|----------------|----------|----------|-------|----------|----------|
| 451 | miR-574-5p(1)  | 0.005394 | 0.019050 | -3.5  | 1.12E-04 | 6.15E-04 |
| 452 | miR-576-3p(1)  | 0.001030 | 0.002710 | -2.5  | 6.44E-02 | 1.22E-01 |
| 453 | miR-576-5p(1)  | 0.000896 | 0.002288 | -2.5  | 1.48E-01 | 2.41E-01 |
| 454 | miR-577(1)     | 0.000000 | 0.000088 | -18.2 | 4.88E-04 | 2.13E-03 |
| 455 | miR-579-3p(1)  | 0.000021 | 0.000137 | -3.7  | 9.07E-02 | 1.63E-01 |
| 456 | miR-582(1)     | 0.000647 | 0.004051 | -6.1  | 4.89E-03 | 1.53E-02 |
| 457 | miR-582STAR(1) | 0.000541 | 0.001879 | -3.4  | 2.72E-02 | 6.01E-02 |
| 458 | miR-584(1)     | 0.000583 | 0.001676 | -2.8  | 4.83E-02 | 9.69E-02 |
| 459 | miR-589-3p(1)  | 0.000172 | 0.000350 | -1.8  | 8.43E-02 | 1.54E-01 |
| 460 | miR-590-5p(1)  | 0.001376 | 0.005960 | -4.2  | 1.51E-02 | 3.78E-02 |
| 461 | miR-592(1)     | 0.000023 | 0.000159 | -5.0  | 3.44E-03 | 1.15E-02 |
| 462 | miR-597(1)     | 0.000098 | 0.000437 | -5.2  | 3.80E-02 | 7.94E-02 |
| 463 | miR-598(1)     | 0.001339 | 0.004197 | -3.1  | 1.73E-03 | 6.52E-03 |
| 464 | miR-615STAR(1) | 0.000271 | 0.000613 | -2.1  | 5.73E-02 | 1.11E-01 |
| 465 | miR-624-3p(1)  | 0.000099 | 0.000366 | -3.2  | 1.06E-01 | 1.85E-01 |
| 466 | miR-625-3p(1)  | 0.000820 | 0.002604 | -3.1  | 5.14E-03 | 1.59E-02 |
| 467 | miR-625-5p(1)  | 0.000924 | 0.003681 | -3.8  | 2.83E-03 | 9.97E-03 |
| 468 | miR-627-3p(1)  | 0.000223 | 0.000551 | -2.3  | 6.41E-02 | 1.21E-01 |
| 469 | miR-627-5p(1)  | 0.001594 | 0.003777 | -2.3  | 6.30E-02 | 1.20E-01 |
| 470 | miR-629(1)     | 0.002588 | 0.014654 | -5.5  | 2.35E-05 | 1.60E-04 |
| 471 | miR-636STAR(1) | 0.000843 | 0.000043 | 21.7  | 1.05E-03 | 4.16E-03 |
| 472 | miR-641-3p(1)  | 0.000014 | 0.000078 | -3.1  | 6.55E-02 | 1.23E-01 |
| 473 | miR-642-5p(1)  | 0.000560 | 0.000107 | 5.6   | 5.88E-02 | 1.13E-01 |
| 474 | miR-651(1)     | 0.000400 | 0.002692 | -6.5  | 1.53E-05 | 1.12E-04 |
| 475 | miR-652(1)     | 0.010882 | 0.049542 | -4.5  | 1.01E-05 | 7.66E-05 |
| 476 | miR-652STAR(1) | 0.000580 | 0.004870 | -8.1  | 3.73E-03 | 1.22E-02 |
| 477 | miR-654(1)     | 0.002909 | 0.016450 | -5.6  | 7.16E-05 | 4.20E-04 |
| 478 | miR-654STAR(1) | 0.002560 | 0.005910 | -2.3  | 6.89E-03 | 2.03E-02 |
| 479 | miR-655(1)     | 0.003674 | 0.011449 | -3.0  | 4.39E-02 | 8.94E-02 |
| 480 | miR-656(1)     | 0.000726 | 0.004080 | -5.2  | 3.87E-04 | 1.72E-03 |

|     | A              | B        | C        | D     | E        | F        |
|-----|----------------|----------|----------|-------|----------|----------|
| 481 | miR-656STAR(1  | 0.000030 | 0.000104 | -2.7  | 9.78E-02 | 1.73E-01 |
| 482 | miR-660(1)     | 0.008473 | 0.038638 | -4.5  | 6.27E-05 | 3.81E-04 |
| 483 | miR-665(1)     | 0.001898 | 0.011994 | -6.1  | 2.52E-03 | 9.01E-03 |
| 484 | miR-665STAR(1  | 0.000027 | 0.000117 | -2.9  | 6.73E-02 | 1.26E-01 |
| 485 | miR-671-3p(1)  | 0.000315 | 0.000814 | -2.4  | 6.37E-02 | 1.21E-01 |
| 486 | miR-671-5p(1)  | 0.006600 | 0.014035 | -2.1  | 1.26E-01 | 2.13E-01 |
| 487 | miR-6720-3p(1) | 0.000006 | 0.000348 | -20.6 | 3.46E-03 | 1.15E-02 |
| 488 | miR-6720-5p(1) | 0.000000 | 0.000179 | -37.7 | 5.00E-05 | 3.10E-04 |
| 489 | miR-7-1STAR(1  | 0.001172 | 0.002774 | -2.3  | 8.49E-03 | 2.40E-02 |
| 490 | miR-708(1)     | 0.024795 | 0.101922 | -4.1  | 7.64E-05 | 4.42E-04 |
| 491 | miR-708STAR(1  | 0.001146 | 0.006943 | -5.7  | 4.05E-04 | 1.79E-03 |
| 492 | miR-744(1)     | 0.011869 | 0.028298 | -2.4  | 2.95E-03 | 1.02E-02 |
| 493 | miR-744STAR(1  | 0.000131 | 0.000563 | -3.8  | 1.89E-02 | 4.51E-02 |
| 494 | miR-758(1)     | 0.000561 | 0.002915 | -5.6  | 4.29E-05 | 2.70E-04 |
| 495 | miR-760(1)     | 0.001796 | 0.006257 | -3.4  | 2.07E-03 | 7.66E-03 |
| 496 | miR-767(1)     | 0.000002 | 0.000029 | -4.2  | 2.49E-02 | 5.62E-02 |
| 497 | miR-769(1)     | 0.014678 | 0.033268 | -2.3  | 3.28E-03 | 1.11E-02 |
| 498 | miR-769STAR(1  | 0.000406 | 0.001108 | -2.5  | 2.26E-02 | 5.26E-02 |
| 499 | miR-770(1)     | 0.000004 | 0.000104 | -10.7 | 1.76E-03 | 6.60E-03 |
| 500 | miR-873(1)     | 0.000150 | 0.002294 | -13.2 | 2.26E-06 | 2.07E-05 |
| 501 | miR-873STAR(1  | 0.000008 | 0.000124 | -6.5  | 5.98E-04 | 2.54E-03 |
| 502 | miR-874(1)     | 0.008899 | 0.022289 | -2.5  | 8.34E-03 | 2.36E-02 |
| 503 | miR-874STAR(1  | 0.000684 | 0.001778 | -2.5  | 4.76E-02 | 9.64E-02 |
| 504 | miR-876-3p(1)  | 0.000048 | 0.000414 | -9.3  | 1.11E-02 | 3.02E-02 |
| 505 | miR-876-5p(1)  | 0.000004 | 0.000670 | -49.0 | 1.43E-04 | 7.68E-04 |
| 506 | miR-877-3p(1)  | 0.000046 | 0.000214 | -3.5  | 3.51E-02 | 7.43E-02 |
| 507 | miR-885(1)     | 0.000024 | 0.000416 | -11.8 | 1.22E-02 | 3.23E-02 |
| 508 | miR-887(1)     | 0.007145 | 0.017209 | -2.4  | 2.44E-02 | 5.55E-02 |
| 509 | miR-9(3)       | 0.003183 | 0.024679 | -7.7  | 1.03E-04 | 5.72E-04 |
| 510 | miR-92a-1STAR  | 0.000179 | 0.000571 | -2.9  | 1.58E-02 | 3.90E-02 |

|     | A              | B        | C        | D     | E        | F        |
|-----|----------------|----------|----------|-------|----------|----------|
| 511 | miR-92a(2)     | 0.086821 | 0.342477 | -3.9  | 2.46E-06 | 2.22E-05 |
| 512 | miR-92b(1)     | 0.001904 | 0.006344 | -3.2  | 7.23E-04 | 2.99E-03 |
| 513 | miR-92bSTAR(1) | 0.000214 | 0.000639 | -2.7  | 4.64E-03 | 1.46E-02 |
| 514 | miR-93(1)      | 0.194409 | 0.300083 | -1.5  | 5.55E-02 | 1.09E-01 |
| 515 | miR-934(1)     | 0.000000 | 0.000293 | -59.9 | 3.12E-04 | 1.45E-03 |
| 516 | miR-93STAR(1)  | 0.002201 | 0.005906 | -2.7  | 3.31E-03 | 1.11E-02 |
| 517 | miR-942STAR(1) | 0.000014 | 0.000095 | -3.8  | 1.29E-01 | 2.16E-01 |
| 518 | miR-944(1)     | 0.000085 | 0.005925 | -71.8 | 6.25E-08 | 9.16E-07 |
| 519 | miR-944STAR(1) | 0.000000 | 0.000227 | -48.6 | 4.25E-04 | 1.86E-03 |
| 520 | miR-95(1)      | 0.003612 | 0.010486 | -2.8  | 9.00E-03 | 2.52E-02 |
| 521 | miR-96(1)      | 0.002022 | 0.019914 | -9.4  | 7.00E-05 | 4.16E-04 |
| 522 | miR-98(1)      | 0.054801 | 0.112021 | -2.0  | 1.41E-01 | 2.32E-01 |
| 523 | miR-98STAR(1)  | 0.000806 | 0.001342 | -1.6  | 1.54E-01 | 2.50E-01 |
| 524 | miR-99a(1)     | 0.842433 | 2.368637 | -2.8  | 1.04E-02 | 2.84E-02 |
| 525 | miR-99aSTAR(1) | 0.001201 | 0.009615 | -8.0  | 1.62E-04 | 8.50E-04 |
| 526 | miR-99bSTAR(1) | 0.003469 | 0.006728 | -1.9  | 1.91E-02 | 4.55E-02 |
| 527 | miR-9STAR(3)   | 0.000978 | 0.002884 | -3.1  | 3.05E-02 | 6.59E-02 |

|    | A              | B                             | C         | D                  | E              | F          |
|----|----------------|-------------------------------|-----------|--------------------|----------------|------------|
| 1  |                | <b>Relative frequency (%)</b> |           |                    |                |            |
| 2  | <b>miRNA</b>   | <b>HUVEC</b>                  | <b>NS</b> | <b>Fold change</b> | <b>P Value</b> | <b>FDR</b> |
| 3  | miR-363(1)     | 0.000241                      | 0.037352  | -149.1             | 1.48E-14       | 1.14E-11   |
| 4  | miR-182(1)     | 0.000673                      | 0.086833  | -128.3             | 2.69E-14       | 1.14E-11   |
| 5  | miR-708(1)     | 0.000208                      | 0.101922  | -504.0             | 4.01E-13       | 1.14E-10   |
| 6  | miR-148a(1)    | 0.081501                      | 6.204235  | -76.1              | 1.66E-12       | 3.53E-10   |
| 7  | miR-142-3p(1)  | 0.000957                      | 0.143444  | -150.2             | 4.98E-12       | 8.47E-10   |
| 8  | miR-217(1)     | 0.478305                      | 0.000328  | 1371.5             | 1.07E-11       | 1.52E-09   |
| 9  | miR-216aSTAR   | 0.013719                      | 0.000004  | 1402.4             | 3.51E-11       | 4.26E-09   |
| 10 | miR-155(1)     | 0.347328                      | 0.008889  | 39.0               | 5.41E-11       | 5.17E-09   |
| 11 | miR-183(1)     | 0.000336                      | 0.031322  | -87.5              | 5.47E-11       | 5.17E-09   |
| 12 | miR-211(1)     | 0.000065                      | 0.034175  | -468.4             | 1.54E-10       | 1.31E-08   |
| 13 | miR-486(1)     | 0.001068                      | 0.044775  | -41.4              | 2.79E-10       | 2.16E-08   |
| 14 | miR-199b-5p(1) | 0.002382                      | 0.555891  | -233.9             | 4.13E-10       | 2.93E-08   |
| 15 | miR-429(1)     | 0.000227                      | 0.040148  | -178.1             | 4.55E-10       | 2.97E-08   |
| 16 | miR-216a(1)    | 0.158657                      | 0.000261  | 640.7              | 5.72E-10       | 3.47E-08   |
| 17 | miR-223(1)     | 0.000267                      | 0.035462  | -136.1             | 7.56E-10       | 4.28E-08   |
| 18 | miR-146b(1)    | 0.005211                      | 0.230151  | -44.0              | 8.99E-10       | 4.77E-08   |
| 19 | miR-193b(1)    | 0.008209                      | 0.191975  | -23.4              | 9.66E-10       | 4.83E-08   |
| 20 | miR-200b(1)    | 0.001378                      | 0.425736  | -309.2             | 1.20E-09       | 5.66E-08   |
| 21 | miR-31-5p(1)   | 0.192663                      | 0.000859  | 233.9              | 1.60E-09       | 7.12E-08   |
| 22 | miR-217STAR(1) | 0.006270                      | 0.000004  | 641.9              | 1.67E-09       | 7.12E-08   |
| 23 | miR-148aSTAR   | 0.000590                      | 0.012806  | -21.6              | 2.46E-09       | 9.95E-08   |
| 24 | miR-203(1)     | 0.006589                      | 6.199758  | -941.9             | 3.96E-09       | 1.53E-07   |
| 25 | miR-199a-3p(3) | 0.172428                      | 4.394329  | -25.5              | 5.05E-09       | 1.87E-07   |
| 26 | miR-21(1)      | 49.957146                     | 3.906535  | 12.8               | 5.79E-09       | 2.02E-07   |
| 27 | miR-511-3p(2)  | 0.000016                      | 0.005414  | -277.9             | 5.93E-09       | 2.02E-07   |
| 28 | miR-190a(1)    | 0.001196                      | 0.038271  | -32.1              | 6.43E-09       | 2.10E-07   |
| 29 | miR-193bSTAR   | 0.000323                      | 0.006890  | -20.8              | 6.69E-09       | 2.11E-07   |
| 30 | miR-200c(1)    | 0.001707                      | 0.587965  | -340.9             | 1.10E-08       | 3.34E-07   |

|    | A              | B        | C         | D       | E        | F        |
|----|----------------|----------|-----------|---------|----------|----------|
| 31 | miR-205(1)     | 0.003342 | 2.430434  | -728.4  | 1.44E-08 | 4.23E-07 |
| 32 | miR-504(1)     | 0.000098 | 0.004625  | -48.7   | 2.27E-08 | 6.26E-07 |
| 33 | miR-338-3p(1)  | 0.000685 | 0.048033  | -69.6   | 2.28E-08 | 6.26E-07 |
| 34 | miR-7(3)       | 0.320004 | 0.028887  | 11.1    | 4.27E-08 | 1.14E-06 |
| 35 | miR-221STAR(1) | 0.272301 | 0.015258  | 17.8    | 5.29E-08 | 1.36E-06 |
| 36 | miR-31-3p(1)   | 0.113179 | 0.000409  | 301.4   | 5.61E-08 | 1.40E-06 |
| 37 | miR-143(1)     | 0.313560 | 10.807826 | -34.5   | 6.34E-08 | 1.54E-06 |
| 38 | miR-200a(1)    | 0.001194 | 0.305010  | -255.1  | 8.01E-08 | 1.89E-06 |
| 39 | miR-23b(1)     | 0.136357 | 1.110072  | -8.1    | 9.79E-08 | 2.25E-06 |
| 40 | miR-708STAR(1) | 0.000054 | 0.006943  | -114.5  | 1.38E-07 | 3.09E-06 |
| 41 | miR-210(1)     | 0.028199 | 0.525164  | -18.6   | 1.73E-07 | 3.71E-06 |
| 42 | miR-222(1)     | 2.294373 | 0.460232  | 5.0     | 1.74E-07 | 3.71E-06 |
| 43 | miR-20b(1)     | 0.000888 | 0.012596  | -13.9   | 1.98E-07 | 4.10E-06 |
| 44 | miR-141(1)     | 0.004910 | 2.157410  | -437.6  | 2.26E-07 | 4.57E-06 |
| 45 | miR-142-5p(1)  | 0.002403 | 0.130366  | -54.4   | 2.31E-07 | 4.57E-06 |
| 46 | miR-431-5p(1)  | 0.032467 | 0.003195  | 10.1    | 2.55E-07 | 4.92E-06 |
| 47 | miR-1(2)       | 0.002209 | 0.407418  | -185.5  | 2.71E-07 | 5.13E-06 |
| 48 | miR-96(1)      | 0.000173 | 0.019914  | -106.9  | 3.13E-07 | 5.79E-06 |
| 49 | miR-143STAR(1) | 0.000902 | 0.179024  | -199.3  | 4.05E-07 | 7.32E-06 |
| 50 | miR-375(1)     | 0.000045 | 0.008830  | -153.7  | 4.15E-07 | 7.35E-06 |
| 51 | miR-873(1)     | 0.000028 | 0.002294  | -69.8   | 4.58E-07 | 7.95E-06 |
| 52 | miR-421(1)     | 0.035925 | 0.002637  | 13.7    | 5.01E-07 | 8.46E-06 |
| 53 | miR-944(1)     | 0.000032 | 0.005925  | -135.5  | 5.08E-07 | 8.46E-06 |
| 54 | miR-203STAR(1) | 0.000153 | 0.084670  | -535.4  | 5.89E-07 | 9.62E-06 |
| 55 | miR-216b(1)    | 0.003883 | 0.000081  | 41.1    | 6.58E-07 | 1.05E-05 |
| 56 | miR-3176(1)    | 0.001236 | 0.000070  | 21.5    | 6.70E-07 | 1.05E-05 |
| 57 | miR-301b(1)    | 0.041360 | 0.003387  | 12.2    | 7.51E-07 | 1.16E-05 |
| 58 | miR-508(1)     | 0.000029 | 0.013871  | -414.6  | 7.76E-07 | 1.18E-05 |
| 59 | miR-1247(1)    | 0.000028 | 0.004746  | -142.5  | 8.21E-07 | 1.22E-05 |
| 60 | miR-514a(3)    | 0.000040 | 0.043465  | -1238.8 | 9.56E-07 | 1.40E-05 |

|    | A                 | B        | C        | D       | E        | F        |
|----|-------------------|----------|----------|---------|----------|----------|
| 61 | miR-9(3)          | 0.000548 | 0.024679 | -43.7   | 1.07E-06 | 1.54E-05 |
| 62 | miR-137STAR(1)    | 0.001033 | 0.000000 | 207.2   | 1.13E-06 | 1.61E-05 |
| 63 | miR-574-3p(1)     | 0.012011 | 0.087547 | -7.3    | 1.18E-06 | 1.64E-05 |
| 64 | miR-1197(1)       | 0.002804 | 0.000141 | 18.7    | 1.28E-06 | 1.75E-05 |
| 65 | miR-27b(1)        | 0.477708 | 2.181145 | -4.6    | 1.41E-06 | 1.91E-05 |
| 66 | miR-150(1)        | 0.000411 | 0.033068 | -80.2   | 1.45E-06 | 1.93E-05 |
| 67 | miR-675-5p(1)     | 0.000020 | 0.004437 | -225.1  | 1.55E-06 | 2.03E-05 |
| 68 | miR-145(1)        | 0.023852 | 2.768055 | -116.0  | 1.66E-06 | 2.13E-05 |
| 69 | miR-101-1STAR(1)  | 0.001670 | 0.016112 | -9.7    | 1.98E-06 | 2.52E-05 |
| 70 | miR-488(1)        | 0.000042 | 0.005602 | -119.6  | 2.01E-06 | 2.52E-05 |
| 71 | miR-124(3)        | 0.000000 | 0.000618 | -122.7  | 2.14E-06 | 2.64E-05 |
| 72 | miR-451(1)        | 0.031573 | 2.033822 | -64.4   | 2.20E-06 | 2.67E-05 |
| 73 | miR-378(1)        | 0.218337 | 1.254631 | -5.7    | 2.26E-06 | 2.70E-05 |
| 74 | miR-135b(1)       | 0.000248 | 0.004144 | -16.7   | 2.37E-06 | 2.79E-05 |
| 75 | miR-144STAR(1)    | 0.000478 | 0.043365 | -90.6   | 2.56E-06 | 2.98E-05 |
| 76 | miR-585(1)        | 0.000052 | 0.001757 | -30.1   | 2.63E-06 | 2.98E-05 |
| 77 | miR-506(1)        | 0.000000 | 0.001591 | -319.3  | 2.63E-06 | 2.98E-05 |
| 78 | miR-153(2)        | 0.000195 | 0.015426 | -81.8   | 2.83E-06 | 3.16E-05 |
| 79 | miR-155STAR(1)    | 0.002043 | 0.000033 | 49.9    | 2.86E-06 | 3.16E-05 |
| 80 | miR-101(2)        | 0.171595 | 1.097522 | -6.4    | 3.10E-06 | 3.38E-05 |
| 81 | miR-144(1)        | 0.002893 | 0.302408 | -104.8  | 3.56E-06 | 3.79E-05 |
| 82 | miR-509-3p(3)     | 0.000000 | 0.016208 | -3231.3 | 3.56E-06 | 3.79E-05 |
| 83 | miR-187(1)        | 0.000165 | 0.002871 | -17.0   | 3.63E-06 | 3.81E-05 |
| 84 | miR-196a-2STAR(1) | 0.000031 | 0.010971 | -322.9  | 3.90E-06 | 4.04E-05 |
| 85 | miR-214-5p(1)     | 0.002323 | 0.016689 | -7.2    | 3.96E-06 | 4.06E-05 |
| 86 | miR-29b(2)        | 0.884797 | 0.106145 | 8.3     | 4.10E-06 | 4.15E-05 |
| 87 | miR-34a(1)        | 0.260820 | 0.050530 | 5.2     | 4.37E-06 | 4.37E-05 |
| 88 | miR-126-3p(1)     | 7.524689 | 1.227377 | 6.1     | 4.95E-06 | 4.90E-05 |
| 89 | miR-21STAR(1)     | 0.090420 | 0.007978 | 11.3    | 5.10E-06 | 4.98E-05 |
| 90 | miR-378STAR(1)    | 0.001088 | 0.010110 | -9.2    | 5.19E-06 | 5.01E-05 |



|     | A              | B        | C        | D       | E        | F        |
|-----|----------------|----------|----------|---------|----------|----------|
| 91  | miR-34c(1)     | 0.000280 | 0.007019 | -24.1   | 5.40E-06 | 5.15E-05 |
| 92  | miR-106aSTAR   | 0.000000 | 0.000539 | -110.2  | 5.67E-06 | 5.36E-05 |
| 93  | miR-200bSTAR   | 0.000013 | 0.004212 | -222.7  | 6.00E-06 | 5.61E-05 |
| 94  | miR-126-5p(1)  | 2.342417 | 0.337820 | 6.9     | 6.56E-06 | 6.06E-05 |
| 95  | miR-1304STAR   | 0.001716 | 0.000241 | 7.2     | 6.94E-06 | 6.34E-05 |
| 96  | miR-200aSTAR   | 0.000013 | 0.002689 | -142.0  | 7.85E-06 | 7.05E-05 |
| 97  | miR-202(1)     | 0.000072 | 0.003797 | -49.8   | 7.88E-06 | 7.05E-05 |
| 98  | miR-513a-5p(2) | 0.000000 | 0.000784 | -158.9  | 8.79E-06 | 7.78E-05 |
| 99  | miR-125b(2)    | 0.330168 | 1.442813 | -4.4    | 9.61E-06 | 8.42E-05 |
| 100 | miR-296-5p(1)  | 0.000166 | 0.001884 | -11.4   | 1.03E-05 | 8.93E-05 |
| 101 | miR-1270(2)    | 0.000030 | 0.000617 | -18.5   | 1.07E-05 | 9.20E-05 |
| 102 | miR-141STAR(1) | 0.000000 | 0.003210 | -642.4  | 1.14E-05 | 9.70E-05 |
| 103 | miR-412STAR(1) | 0.000633 | 0.000017 | 26.2    | 1.18E-05 | 9.85E-05 |
| 104 | miR-137(1)     | 0.103738 | 0.001637 | 63.1    | 1.18E-05 | 9.85E-05 |
| 105 | miR-95(1)      | 0.000869 | 0.010486 | -11.9   | 1.32E-05 | 1.09E-04 |
| 106 | miR-513c-3p(1) | 0.000000 | 0.000731 | -147.3  | 1.34E-05 | 1.10E-04 |
| 107 | miR-214-3p(1)  | 0.016362 | 0.088555 | -5.4    | 1.44E-05 | 1.17E-04 |
| 108 | miR-3659(1)    | 0.000000 | 0.001347 | -269.3  | 1.54E-05 | 1.24E-04 |
| 109 | miR-222STAR(1) | 0.123104 | 0.001989 | 62.0    | 1.89E-05 | 1.50E-04 |
| 110 | miR-210STAR(1) | 0.000033 | 0.001696 | -48.7   | 1.92E-05 | 1.51E-04 |
| 111 | miR-483-3p(1)  | 0.000000 | 0.005330 | -1067.3 | 2.07E-05 | 1.61E-04 |
| 112 | miR-643STAR(1) | 0.003025 | 0.000020 | 98.3    | 2.11E-05 | 1.63E-04 |
| 113 | miR-204(1)     | 0.000951 | 0.010612 | -10.9   | 2.17E-05 | 1.67E-04 |
| 114 | miR-483-5p(1)  | 0.000070 | 0.010535 | -163.7  | 2.22E-05 | 1.68E-04 |
| 115 | miR-100STAR(1) | 0.059543 | 0.000374 | 153.6   | 2.24E-05 | 1.69E-04 |
| 116 | miR-1185-2-3p  | 0.003671 | 0.000206 | 17.2    | 2.27E-05 | 1.70E-04 |
| 117 | miR-338-5p(1)  | 0.000305 | 0.009415 | -30.5   | 2.38E-05 | 1.76E-04 |
| 118 | miR-28-3p(1)   | 0.030096 | 0.132554 | -4.4    | 2.43E-05 | 1.77E-04 |
| 119 | miR-223STAR(1) | 0.000013 | 0.000518 | -27.9   | 2.44E-05 | 1.77E-04 |
| 120 | miR-200cSTAR   | 0.000020 | 0.001640 | -82.3   | 2.46E-05 | 1.77E-04 |

|     | A               | B        | C        | D       | E        | F        |
|-----|-----------------|----------|----------|---------|----------|----------|
| 121 | miR-149(1)      | 0.003071 | 0.043176 | -14.0   | 2.75E-05 | 1.96E-04 |
| 122 | miR-3200(1)     | 0.005191 | 0.000689 | 7.3     | 2.99E-05 | 2.11E-04 |
| 123 | miR-514b-3p(1)  | 0.000000 | 0.000564 | -114.5  | 3.71E-05 | 2.60E-04 |
| 124 | miR-133aSTAR    | 0.000000 | 0.005114 | -1020.2 | 3.87E-05 | 2.70E-04 |
| 125 | miR-145STAR(1)  | 0.001836 | 0.080254 | -43.5   | 4.77E-05 | 3.30E-04 |
| 126 | miR-511-5p(2)   | 0.000000 | 0.000395 | -79.5   | 5.03E-05 | 3.44E-04 |
| 127 | miR-152(1)      | 0.144807 | 0.706678 | -4.9    | 5.32E-05 | 3.62E-04 |
| 128 | miR-3910(1)     | 0.000000 | 0.000902 | -182.6  | 5.51E-05 | 3.72E-04 |
| 129 | miR-513b(1)     | 0.000000 | 0.000703 | -143.0  | 5.71E-05 | 3.82E-04 |
| 130 | miR-9STAR(3)    | 0.000115 | 0.002884 | -24.1   | 5.93E-05 | 3.94E-04 |
| 131 | miR-183STAR(1)  | 0.000016 | 0.000348 | -17.8   | 6.17E-05 | 4.06E-04 |
| 132 | miR-20bSTAR(1)  | 0.000016 | 0.000283 | -15.5   | 6.72E-05 | 4.39E-04 |
| 133 | miR-513c-5p(1)  | 0.000000 | 0.000757 | -154.0  | 6.95E-05 | 4.51E-04 |
| 134 | miR-3152(1)     | 0.000596 | 0.000021 | 19.9    | 7.01E-05 | 4.52E-04 |
| 135 | miR-509-3-5p(1) | 0.000000 | 0.000731 | -145.8  | 7.81E-05 | 4.99E-04 |
| 136 | miR-1193-5p(1)  | 0.000177 | 0.000000 | 38.3    | 8.19E-05 | 5.19E-04 |
| 137 | miR-130b(1)     | 0.163976 | 0.036762 | 4.5     | 8.83E-05 | 5.55E-04 |
| 138 | miR-199a-5p(2)  | 0.032885 | 0.718565 | -21.9   | 8.89E-05 | 5.55E-04 |
| 139 | miR-675-3p(1)   | 0.000040 | 0.003494 | -98.6   | 9.17E-05 | 5.69E-04 |
| 140 | miR-514aSTAR    | 0.000000 | 0.002487 | -498.0  | 9.24E-05 | 5.69E-04 |
| 141 | let-7bSTAR(1)   | 0.000981 | 0.007252 | -7.3    | 9.34E-05 | 5.71E-04 |
| 142 | miR-133a(2)     | 0.000529 | 0.055050 | -106.4  | 9.42E-05 | 5.72E-04 |
| 143 | miR-551b(1)     | 0.000073 | 0.002370 | -28.2   | 1.00E-04 | 6.04E-04 |
| 144 | miR-383(1)      | 0.000000 | 0.000330 | -64.6   | 1.03E-04 | 6.14E-04 |
| 145 | miR-192(1)      | 0.007140 | 0.033213 | -4.6    | 1.04E-04 | 6.19E-04 |
| 146 | let-7a-2STAR(1) | 0.002021 | 0.000220 | 9.2     | 1.18E-04 | 6.98E-04 |
| 147 | miR-3194-5p(1)  | 0.003349 | 0.000316 | 10.8    | 1.19E-04 | 6.98E-04 |
| 148 | miR-205STAR(1)  | 0.000020 | 0.005473 | -276.0  | 1.20E-04 | 6.99E-04 |
| 149 | miR-151-3p(1)   | 0.585210 | 0.216476 | 2.7     | 1.23E-04 | 7.10E-04 |
| 150 | miR-653-5p(1)   | 0.000000 | 0.000623 | -117.0  | 1.24E-04 | 7.10E-04 |

|     | A               | B        | C        | D     | E        | F        |
|-----|-----------------|----------|----------|-------|----------|----------|
| 151 | miR-125a(1)     | 0.067845 | 0.274388 | -4.0  | 1.24E-04 | 7.10E-04 |
| 152 | miR-129-1-3p(1) | 0.000000 | 0.000325 | -67.3 | 1.32E-04 | 7.46E-04 |
| 153 | miR-532-5p(1)   | 0.013351 | 0.050390 | -3.8  | 1.36E-04 | 7.66E-04 |
| 154 | miR-130bSTAR    | 0.010052 | 0.002519 | 4.0   | 1.40E-04 | 7.81E-04 |
| 155 | miR-29b-1STAR   | 0.005407 | 0.000228 | 24.7  | 1.42E-04 | 7.88E-04 |
| 156 | miR-190aSTAR    | 0.000052 | 0.001285 | -25.4 | 1.48E-04 | 8.18E-04 |
| 157 | miR-30b(1)      | 0.077581 | 0.361902 | -4.7  | 1.50E-04 | 8.24E-04 |
| 158 | miR-1252(1)     | 0.000638 | 0.000028 | 18.3  | 1.53E-04 | 8.32E-04 |
| 159 | miR-487a-3p(1)  | 0.016345 | 0.002475 | 6.5   | 1.59E-04 | 8.60E-04 |
| 160 | miR-516b(2)     | 0.032175 | 0.001621 | 20.3  | 1.60E-04 | 8.60E-04 |
| 161 | miR-154-3p(1)   | 0.020564 | 0.004008 | 5.1   | 1.79E-04 | 9.58E-04 |
| 162 | miR-3614-5p(1)  | 0.000867 | 0.000036 | 20.3  | 1.83E-04 | 9.73E-04 |
| 163 | miR-4636-3p(1)  | 0.000000 | 0.000223 | -45.6 | 1.86E-04 | 9.81E-04 |
| 164 | miR-34aSTAR(1)  | 0.007141 | 0.000551 | 13.1  | 1.87E-04 | 9.81E-04 |
| 165 | miR-30aSTAR(1)  | 0.401208 | 0.117600 | 3.4   | 1.93E-04 | 1.00E-03 |
| 166 | miR-3619-5p(1)  | 0.000586 | 0.000045 | 13.1  | 2.21E-04 | 1.15E-03 |
| 167 | miR-196a(2)     | 0.001458 | 0.128007 | -87.3 | 2.71E-04 | 1.39E-03 |
| 168 | miR-335-5p(1)   | 0.031246 | 0.142437 | -4.6  | 3.11E-04 | 1.58E-03 |
| 169 | miR-218-2STAR   | 0.000000 | 0.000188 | -39.3 | 3.13E-04 | 1.58E-03 |
| 170 | miR-3187(1)     | 0.000844 | 0.000098 | 7.7   | 3.14E-04 | 1.58E-03 |
| 171 | miR-425(1)      | 0.323005 | 0.101433 | 3.2   | 3.15E-04 | 1.58E-03 |
| 172 | miR-154-5p(1)   | 0.000690 | 0.007471 | -10.7 | 3.24E-04 | 1.62E-03 |
| 173 | miR-589-5p(1)   | 0.002165 | 0.000413 | 5.2   | 3.55E-04 | 1.76E-03 |
| 174 | miR-148bSTAR    | 0.010396 | 0.002163 | 4.8   | 3.59E-04 | 1.77E-03 |
| 175 | miR-19aSTAR(1)  | 0.000943 | 0.000091 | 8.8   | 3.74E-04 | 1.83E-03 |
| 176 | miR-3117(1)     | 0.002372 | 0.000101 | 21.9  | 3.74E-04 | 1.83E-03 |
| 177 | miR-374aSTAR    | 0.066352 | 0.014636 | 4.5   | 4.15E-04 | 2.02E-03 |
| 178 | miR-889(1)      | 0.014991 | 0.001314 | 11.3  | 4.27E-04 | 2.06E-03 |
| 179 | miR-877-5p(1)   | 0.004723 | 0.001109 | 4.2   | 4.42E-04 | 2.12E-03 |
| 180 | miR-150STAR(1)  | 0.000013 | 0.000427 | -22.4 | 4.51E-04 | 2.15E-03 |

|     | A              | B        | C        | D      | E        | F        |
|-----|----------------|----------|----------|--------|----------|----------|
| 181 | miR-374bSTAR   | 0.008742 | 0.001234 | 7.3    | 4.59E-04 | 2.18E-03 |
| 182 | miR-424(1)     | 0.525519 | 1.959808 | -3.7   | 4.70E-04 | 2.22E-03 |
| 183 | miR-211STAR(1) | 0.000000 | 0.000284 | -56.6  | 4.78E-04 | 2.24E-03 |
| 184 | miR-615(1)     | 0.000091 | 0.002115 | -21.4  | 5.26E-04 | 2.46E-03 |
| 185 | miR-18aSTAR(1) | 0.004723 | 0.001185 | 3.9    | 5.32E-04 | 2.46E-03 |
| 186 | miR-6720-5p(1) | 0.000000 | 0.000179 | -37.7  | 5.32E-04 | 2.46E-03 |
| 187 | miR-876-5p(1)  | 0.000000 | 0.000670 | -136.8 | 5.51E-04 | 2.53E-03 |
| 188 | miR-513a-3p(2) | 0.000000 | 0.000764 | -154.4 | 7.27E-04 | 3.32E-03 |
| 189 | miR-133b(1)    | 0.000000 | 0.001663 | -335.7 | 7.30E-04 | 3.32E-03 |
| 190 | miR-320(1)     | 0.327718 | 0.935921 | -2.9   | 7.72E-04 | 3.49E-03 |
| 191 | miR-497(1)     | 0.160228 | 0.479853 | -3.0   | 8.02E-04 | 3.61E-03 |
| 192 | miR-30a(1)     | 2.257572 | 0.577132 | 3.9    | 8.52E-04 | 3.80E-03 |
| 193 | miR-28-5p(1)   | 0.029132 | 0.134892 | -4.6   | 8.54E-04 | 3.80E-03 |
| 194 | miR-758STAR(1) | 0.001138 | 0.000215 | 5.4    | 8.71E-04 | 3.86E-03 |
| 195 | miR-3152STAR   | 0.000157 | 0.000006 | 15.8   | 9.13E-04 | 4.02E-03 |
| 196 | miR-328(1)     | 0.001240 | 0.006316 | -5.1   | 9.32E-04 | 4.08E-03 |
| 197 | miR-182STAR(1) | 0.000000 | 0.000158 | -30.5  | 9.82E-04 | 4.28E-03 |
| 198 | miR-30eSTAR(1) | 0.082518 | 0.199059 | -2.4   | 9.91E-04 | 4.30E-03 |
| 199 | miR-1323(1)    | 0.002926 | 0.000170 | 17.6   | 1.00E-03 | 4.32E-03 |
| 200 | miR-301a(1)    | 0.104012 | 0.024391 | 4.3    | 1.05E-03 | 4.52E-03 |
| 201 | miR-491STAR(1) | 0.001000 | 0.000078 | 11.1   | 1.14E-03 | 4.88E-03 |
| 202 | miR-340(1)     | 0.072225 | 0.002997 | 24.1   | 1.21E-03 | 5.16E-03 |
| 203 | miR-496(1)     | 0.003950 | 0.000675 | 5.6    | 1.24E-03 | 5.25E-03 |
| 204 | miR-361-3p(1)  | 0.005626 | 0.015206 | -2.7   | 1.26E-03 | 5.32E-03 |
| 205 | miR-653-3p(1)  | 0.000000 | 0.000355 | -64.5  | 1.27E-03 | 5.33E-03 |
| 206 | miR-3120(1)    | 0.000075 | 0.000000 | 15.5   | 1.28E-03 | 5.33E-03 |
| 207 | miR-153-2STAR  | 0.000000 | 0.000302 | -62.9  | 1.40E-03 | 5.81E-03 |
| 208 | miR-138(2)     | 0.001917 | 0.006309 | -3.3   | 1.41E-03 | 5.82E-03 |
| 209 | miR-380-3p(1)  | 0.003273 | 0.000465 | 6.7    | 1.53E-03 | 6.29E-03 |
| 210 | miR-181d(1)    | 0.026775 | 0.010029 | 2.7    | 1.54E-03 | 6.31E-03 |

|     | A              | B        | C        | D     | E        | F        |
|-----|----------------|----------|----------|-------|----------|----------|
| 211 | miR-449c(1)    | 0.000139 | 0.000007 | 10.2  | 1.57E-03 | 6.34E-03 |
| 212 | miR-516a(2)    | 0.024774 | 0.003878 | 6.4   | 1.57E-03 | 6.34E-03 |
| 213 | miR-3126-5p(1) | 0.000000 | 0.000114 | -22.7 | 1.58E-03 | 6.37E-03 |
| 214 | miR-652(1)     | 0.015959 | 0.049542 | -3.1  | 1.66E-03 | 6.66E-03 |
| 215 | miR-589-3p(1)  | 0.001124 | 0.000350 | 3.4   | 1.71E-03 | 6.81E-03 |
| 216 | miR-585STAR(1) | 0.000016 | 0.000314 | -16.1 | 1.72E-03 | 6.84E-03 |
| 217 | miR-584STAR(1) | 0.000616 | 0.000063 | 9.4   | 1.77E-03 | 6.99E-03 |
| 218 | miR-99a(1)     | 0.514523 | 2.368637 | -4.6  | 1.83E-03 | 7.21E-03 |
| 219 | miR-514b-5p(1) | 0.000000 | 0.000323 | -67.7 | 1.95E-03 | 7.64E-03 |
| 220 | miR-541-5p(1)  | 0.000168 | 0.000014 | 7.7   | 1.96E-03 | 7.64E-03 |
| 221 | miR-934(1)     | 0.000000 | 0.000293 | -59.9 | 1.98E-03 | 7.67E-03 |
| 222 | miR-510-5p(1)  | 0.000000 | 0.000184 | -35.3 | 2.00E-03 | 7.71E-03 |
| 223 | miR-3617(1)    | 0.000000 | 0.000520 | -97.0 | 2.02E-03 | 7.78E-03 |
| 224 | miR-1247STAR   | 0.000000 | 0.000364 | -73.0 | 2.03E-03 | 7.78E-03 |
| 225 | miR-380-5p(1)  | 0.002399 | 0.000486 | 4.7   | 2.10E-03 | 8.02E-03 |
| 226 | miR-4705(1)    | 0.000000 | 0.000115 | -24.0 | 2.11E-03 | 8.03E-03 |
| 227 | miR-410(1)     | 0.026815 | 0.004641 | 5.7   | 2.22E-03 | 8.39E-03 |
| 228 | miR-532-3p(1)  | 0.007310 | 0.021982 | -3.0  | 2.28E-03 | 8.57E-03 |
| 229 | miR-3934(1)    | 0.002378 | 0.000439 | 5.5   | 2.30E-03 | 8.63E-03 |
| 230 | miR-876-3p(1)  | 0.000000 | 0.000414 | -85.8 | 2.46E-03 | 9.18E-03 |
| 231 | miR-944STAR(1) | 0.000000 | 0.000227 | -48.6 | 2.66E-03 | 9.89E-03 |
| 232 | miR-23bSTAR(1) | 0.000290 | 0.002962 | -9.9  | 2.76E-03 | 1.02E-02 |
| 233 | miR-1185-1-3p  | 0.016251 | 0.001464 | 10.9  | 2.79E-03 | 1.03E-02 |
| 234 | miR-455-5p(1)  | 0.006758 | 0.027205 | -4.0  | 2.82E-03 | 1.03E-02 |
| 235 | miR-19a(1)     | 0.493642 | 0.134484 | 3.7   | 2.95E-03 | 1.08E-02 |
| 236 | miR-125b-1STA  | 0.053290 | 0.017534 | 3.0   | 2.96E-03 | 1.08E-02 |
| 237 | miR-362-5p(1)  | 0.008557 | 0.026941 | -3.1  | 3.04E-03 | 1.10E-02 |
| 238 | miR-331STAR(1) | 0.007900 | 0.002426 | 3.3   | 3.22E-03 | 1.16E-02 |
| 239 | miR-10aSTAR(1) | 0.009905 | 0.002125 | 4.7   | 3.37E-03 | 1.21E-02 |
| 240 | miR-2110(1)    | 0.001316 | 0.004034 | -3.0  | 3.44E-03 | 1.23E-02 |

|     | A               | B        | C        | D     | E        | F        |
|-----|-----------------|----------|----------|-------|----------|----------|
| 241 | miR-590-3p(1)   | 0.021942 | 0.006382 | 3.4   | 3.49E-03 | 1.24E-02 |
| 242 | miR-1910(1)     | 0.000448 | 0.000005 | 43.5  | 3.54E-03 | 1.25E-02 |
| 243 | miR-509-5p(2)   | 0.000000 | 0.000330 | -64.2 | 3.54E-03 | 1.25E-02 |
| 244 | miR-519a-1-5p   | 0.000454 | 0.000099 | 4.9   | 3.61E-03 | 1.27E-02 |
| 245 | miR-502(1)      | 0.008206 | 0.021575 | -2.6  | 3.63E-03 | 1.27E-02 |
| 246 | miR-221(1)      | 2.664722 | 1.118186 | 2.4   | 3.66E-03 | 1.28E-02 |
| 247 | miR-19b-1STAR   | 0.009588 | 0.003227 | 3.0   | 3.78E-03 | 1.31E-02 |
| 248 | miR-130a(1)     | 0.260380 | 0.700227 | -2.7  | 3.89E-03 | 1.35E-02 |
| 249 | miR-2355-3p(1)  | 0.002032 | 0.000521 | 3.8   | 3.91E-03 | 1.35E-02 |
| 250 | miR-1277-5p(1)  | 0.010056 | 0.001050 | 9.3   | 3.95E-03 | 1.35E-02 |
| 251 | miR-346(1)      | 0.000000 | 0.000121 | -23.8 | 3.96E-03 | 1.35E-02 |
| 252 | miR-184(1)      | 0.000013 | 0.000294 | -16.2 | 4.09E-03 | 1.39E-02 |
| 253 | miR-510-3p(1)   | 0.000000 | 0.000193 | -40.8 | 4.15E-03 | 1.40E-02 |
| 254 | miR-34b(1)      | 0.000055 | 0.000970 | -16.5 | 4.16E-03 | 1.40E-02 |
| 255 | miR-873STAR(1)  | 0.000010 | 0.000124 | -7.1  | 4.16E-03 | 1.40E-02 |
| 256 | miR-3657(1)     | 0.000450 | 0.000047 | 7.6   | 4.18E-03 | 1.40E-02 |
| 257 | miR-548e(1)     | 0.003888 | 0.001281 | 3.1   | 4.40E-03 | 1.46E-02 |
| 258 | miR-628-5p(1)   | 0.007195 | 0.001369 | 5.3   | 4.41E-03 | 1.46E-02 |
| 259 | miR-429STAR(1)  | 0.000000 | 0.000130 | -28.6 | 4.52E-03 | 1.49E-02 |
| 260 | miR-99aSTAR(1)  | 0.001782 | 0.009615 | -5.4  | 4.56E-03 | 1.50E-02 |
| 261 | miR-24-1STAR(1) | 0.001513 | 0.010730 | -7.0  | 4.75E-03 | 1.56E-02 |
| 262 | miR-129-2-3p(1) | 0.000145 | 0.001497 | -10.3 | 4.80E-03 | 1.56E-02 |
| 263 | miR-30d(1)      | 0.221080 | 0.526805 | -2.4  | 4.81E-03 | 1.56E-02 |
| 264 | miR-323aSTAR    | 0.000217 | 0.000021 | 7.8   | 4.82E-03 | 1.56E-02 |
| 265 | miR-18a(1)      | 0.161645 | 0.043217 | 3.7   | 4.88E-03 | 1.58E-02 |
| 266 | miR-6720-3p(1)  | 0.000000 | 0.000348 | -72.3 | 5.00E-03 | 1.61E-02 |
| 267 | miR-885(1)      | 0.000000 | 0.000416 | -79.8 | 5.14E-03 | 1.65E-02 |
| 268 | miR-1305(1)     | 0.000000 | 0.000062 | -14.1 | 5.18E-03 | 1.66E-02 |
| 269 | miR-323b(1)     | 0.003007 | 0.000613 | 4.8   | 5.23E-03 | 1.66E-02 |
| 270 | miR-496STAR(1)  | 0.000127 | 0.000007 | 9.3   | 5.32E-03 | 1.69E-02 |

|     | A              | B        | C        | D     | E        | F        |
|-----|----------------|----------|----------|-------|----------|----------|
| 271 | miR-1909(1)    | 0.000218 | 0.000023 | 7.5   | 5.39E-03 | 1.70E-02 |
| 272 | let-7b(1)      | 0.279693 | 1.821666 | -6.5  | 5.44E-03 | 1.71E-02 |
| 273 | miR-660(1)     | 0.012819 | 0.038638 | -3.0  | 5.98E-03 | 1.87E-02 |
| 274 | miR-4636-5p(1) | 0.000000 | 0.000244 | -50.7 | 6.07E-03 | 1.89E-02 |
| 275 | miR-361-5p(1)  | 0.145338 | 0.042867 | 3.4   | 6.08E-03 | 1.89E-02 |
| 276 | miR-4725-3p(1) | 0.000123 | 0.000006 | 9.3   | 6.30E-03 | 1.96E-02 |
| 277 | miR-129-5p(2)  | 0.000126 | 0.000526 | -4.2  | 6.39E-03 | 1.98E-02 |
| 278 | miR-539(1)     | 0.022481 | 0.005899 | 3.8   | 6.74E-03 | 2.08E-02 |
| 279 | miR-3677-3p(1) | 0.000253 | 0.000035 | 8.0   | 7.06E-03 | 2.17E-02 |
| 280 | let-7a(3)      | 2.578281 | 5.578450 | -2.2  | 7.14E-03 | 2.18E-02 |
| 281 | miR-135a(2)    | 0.000080 | 0.000312 | -3.6  | 7.27E-03 | 2.21E-02 |
| 282 | miR-15bSTAR(1) | 0.016965 | 0.004853 | 3.5   | 7.28E-03 | 2.21E-02 |
| 283 | miR-525-5p(1)  | 0.000591 | 0.000116 | 4.7   | 7.36E-03 | 2.23E-02 |
| 284 | miR-1226STAR   | 0.000282 | 0.000020 | 11.2  | 7.75E-03 | 2.34E-02 |
| 285 | miR-17(1)      | 0.983182 | 0.426612 | 2.3   | 7.80E-03 | 2.34E-02 |
| 286 | miR-1295(1)    | 0.000000 | 0.000231 | -47.1 | 8.00E-03 | 2.39E-02 |
| 287 | miR-3690(2)    | 0.000000 | 0.000122 | -23.6 | 8.24E-03 | 2.46E-02 |
| 288 | miR-193a-3p(1) | 0.604687 | 0.137176 | 4.4   | 8.66E-03 | 2.57E-02 |
| 289 | miR-542(1)     | 0.029882 | 0.117700 | -3.9  | 8.72E-03 | 2.58E-02 |
| 290 | miR-584(1)     | 0.008401 | 0.001676 | 5.0   | 8.80E-03 | 2.60E-02 |
| 291 | miR-1294STAR   | 0.000246 | 0.000028 | 7.1   | 8.99E-03 | 2.64E-02 |
| 292 | miR-26b(1)     | 0.532594 | 1.258689 | -2.4  | 9.14E-03 | 2.68E-02 |
| 293 | miR-30c-1STAR  | 0.001202 | 0.003174 | -2.6  | 9.34E-03 | 2.73E-02 |
| 294 | miR-26a(2)     | 2.024934 | 5.510154 | -2.7  | 9.37E-03 | 2.73E-02 |
| 295 | miR-181b(2)    | 0.235274 | 0.088967 | 2.6   | 9.61E-03 | 2.79E-02 |
| 296 | miR-29aSTAR(1) | 0.012281 | 0.002069 | 6.0   | 9.84E-03 | 2.84E-02 |
| 297 | miR-582(1)     | 0.025814 | 0.004051 | 6.4   | 1.03E-02 | 2.97E-02 |
| 298 | miR-194(2)     | 0.007174 | 0.019662 | -2.7  | 1.07E-02 | 3.08E-02 |
| 299 | miR-493-3p(1)  | 0.002714 | 0.009495 | -3.5  | 1.08E-02 | 3.10E-02 |
| 300 | miR-1245-5p(1) | 0.000000 | 0.000067 | -15.8 | 1.09E-02 | 3.10E-02 |

|     | A              | B        | C        | D     | E        | F        |
|-----|----------------|----------|----------|-------|----------|----------|
| 301 | miR-105(2)     | 0.000000 | 0.000053 | -13.4 | 1.13E-02 | 3.22E-02 |
| 302 | miR-33bSTAR(1) | 0.001643 | 0.000303 | 5.5   | 1.14E-02 | 3.23E-02 |
| 303 | miR-582STAR(1) | 0.009124 | 0.001879 | 4.9   | 1.15E-02 | 3.23E-02 |
| 304 | miR-3174(1)    | 0.000248 | 0.000023 | 9.0   | 1.15E-02 | 3.23E-02 |
| 305 | miR-181b-1STAR | 0.001622 | 0.000489 | 3.2   | 1.16E-02 | 3.25E-02 |
| 306 | miR-543(1)     | 0.014369 | 0.004375 | 3.3   | 1.19E-02 | 3.33E-02 |
| 307 | miR-491(1)     | 0.007953 | 0.002142 | 3.7   | 1.25E-02 | 3.47E-02 |
| 308 | miR-499STAR(1) | 0.000049 | 0.000444 | -9.1  | 1.25E-02 | 3.47E-02 |
| 309 | miR-503(1)     | 0.057867 | 0.021247 | 2.7   | 1.26E-02 | 3.48E-02 |
| 310 | miR-545-3p(1)  | 0.008545 | 0.001364 | 6.3   | 1.27E-02 | 3.50E-02 |
| 311 | miR-3192(1)    | 0.000123 | 0.000006 | 12.7  | 1.28E-02 | 3.51E-02 |
| 312 | miR-3938(1)    | 0.000177 | 0.000006 | 17.5  | 1.30E-02 | 3.55E-02 |
| 313 | miR-296-3p(1)  | 0.000348 | 0.001093 | -3.1  | 1.33E-02 | 3.64E-02 |
| 314 | miR-489(1)     | 0.000016 | 0.000312 | -14.8 | 1.35E-02 | 3.68E-02 |
| 315 | miR-1304(1)    | 0.001655 | 0.000189 | 8.0   | 1.38E-02 | 3.74E-02 |
| 316 | miR-627-5p(1)  | 0.000992 | 0.003777 | -3.8  | 1.40E-02 | 3.80E-02 |
| 317 | miR-140(1)     | 0.127782 | 0.330303 | -2.6  | 1.41E-02 | 3.80E-02 |
| 318 | miR-4746(1)    | 0.000355 | 0.000051 | 5.9   | 1.43E-02 | 3.83E-02 |
| 319 | miR-345(1)     | 0.032577 | 0.016249 | 2.0   | 1.44E-02 | 3.86E-02 |
| 320 | miR-450a(2)    | 0.009224 | 0.035589 | -3.9  | 1.46E-02 | 3.90E-02 |
| 321 | miR-128-1STAR  | 0.000288 | 0.000056 | 5.2   | 1.54E-02 | 4.10E-02 |
| 322 | miR-517b(1)    | 0.000940 | 0.000318 | 3.1   | 1.55E-02 | 4.12E-02 |
| 323 | miR-519dSTAR   | 0.000105 | 0.000008 | 7.2   | 1.62E-02 | 4.28E-02 |
| 324 | miR-1283-5p(2) | 0.001007 | 0.000257 | 5.1   | 1.66E-02 | 4.39E-02 |
| 325 | miR-526b-5p(1) | 0.000714 | 0.000218 | 3.5   | 1.67E-02 | 4.39E-02 |
| 326 | miR-642-3p(1)  | 0.000000 | 0.000130 | -24.6 | 1.70E-02 | 4.46E-02 |
| 327 | miR-20a(1)     | 0.376151 | 0.141330 | 2.7   | 1.71E-02 | 4.47E-02 |
| 328 | miR-15b(1)     | 0.210764 | 0.083943 | 2.5   | 1.76E-02 | 4.60E-02 |
| 329 | miR-1276(1)    | 0.000074 | 0.000003 | 8.2   | 1.77E-02 | 4.60E-02 |
| 330 | miR-301bSTAR   | 0.000182 | 0.000017 | 7.9   | 1.89E-02 | 4.91E-02 |



|     | A              | B        | C        | D     | E        | F        |
|-----|----------------|----------|----------|-------|----------|----------|
| 331 | miR-342(1)     | 0.046562 | 0.084378 | -1.8  | 1.92E-02 | 4.96E-02 |
| 332 | miR-374a(1)    | 0.296594 | 0.092976 | 3.2   | 1.93E-02 | 4.96E-02 |
| 333 | miR-362-3p(1)  | 0.003029 | 0.010505 | -3.5  | 1.96E-02 | 5.04E-02 |
| 334 | miR-218(2)     | 0.051272 | 0.112763 | -2.2  | 2.02E-02 | 5.16E-02 |
| 335 | miR-519a-2-5p  | 0.000584 | 0.000121 | 5.6   | 2.11E-02 | 5.39E-02 |
| 336 | miR-2355-5p(1) | 0.001640 | 0.000302 | 5.1   | 2.14E-02 | 5.44E-02 |
| 337 | miR-541-3p(1)  | 0.000235 | 0.000046 | 4.1   | 2.15E-02 | 5.46E-02 |
| 338 | miR-135bSTAR   | 0.000013 | 0.000182 | -10.1 | 2.24E-02 | 5.64E-02 |
| 339 | miR-136-5p(1)  | 0.018691 | 0.064905 | -3.5  | 2.24E-02 | 5.64E-02 |
| 340 | miR-3934STAR   | 0.000190 | 0.000033 | 4.9   | 2.24E-02 | 5.64E-02 |
| 341 | miR-767(1)     | 0.000000 | 0.000029 | -8.4  | 2.25E-02 | 5.64E-02 |
| 342 | miR-26bSTAR(1) | 0.000693 | 0.003454 | -5.0  | 2.26E-02 | 5.66E-02 |
| 343 | miR-34cSTAR(1) | 0.000010 | 0.000173 | -10.0 | 2.39E-02 | 5.97E-02 |
| 344 | miR-379STAR(1) | 0.003091 | 0.000902 | 3.4   | 2.41E-02 | 6.00E-02 |
| 345 | miR-1294(1)    | 0.000466 | 0.000134 | 3.4   | 2.44E-02 | 6.04E-02 |
| 346 | miR-363STAR(1) | 0.000010 | 0.000080 | -5.1  | 2.49E-02 | 6.14E-02 |
| 347 | miR-1976(1)    | 0.000016 | 0.000133 | -6.4  | 2.49E-02 | 6.14E-02 |
| 348 | miR-548k(1)    | 0.001057 | 0.000437 | 2.4   | 2.57E-02 | 6.31E-02 |
| 349 | miR-425STAR(1) | 0.004764 | 0.010742 | -2.3  | 2.77E-02 | 6.78E-02 |
| 350 | let-7f(2)      | 2.809127 | 6.594766 | -2.3  | 2.79E-02 | 6.82E-02 |
| 351 | miR-671-5p(1)  | 0.049816 | 0.014035 | 3.5   | 2.81E-02 | 6.85E-02 |
| 352 | miR-508STAR(1) | 0.000000 | 0.000146 | -30.3 | 2.96E-02 | 7.19E-02 |
| 353 | miR-1251(1)    | 0.000033 | 0.000000 | 6.8   | 3.03E-02 | 7.31E-02 |
| 354 | miR-515(2)     | 0.005973 | 0.001635 | 3.7   | 3.03E-02 | 7.31E-02 |
| 355 | miR-518e-5p(5) | 0.000800 | 0.000206 | 4.0   | 3.09E-02 | 7.45E-02 |
| 356 | miR-423-5p(1)  | 0.026416 | 0.057746 | -2.2  | 3.21E-02 | 7.71E-02 |
| 357 | miR-30c-2STAR  | 0.022960 | 0.006750 | 3.4   | 3.22E-02 | 7.72E-02 |
| 358 | miR-128(2)     | 0.048636 | 0.023197 | 2.1   | 3.25E-02 | 7.75E-02 |
| 359 | miR-3175(1)    | 0.000153 | 0.000011 | 9.7   | 3.27E-02 | 7.78E-02 |
| 360 | miR-29c(1)     | 0.040243 | 0.110747 | -2.7  | 3.42E-02 | 8.13E-02 |

|     | A              | B        | C        | D     | E        | F        |
|-----|----------------|----------|----------|-------|----------|----------|
| 361 | miR-485-3p(1)  | 0.003012 | 0.001218 | 2.5   | 3.44E-02 | 8.14E-02 |
| 362 | miR-486STAR(1) | 0.000080 | 0.000522 | -6.5  | 3.55E-02 | 8.38E-02 |
| 363 | miR-625-3p(1)  | 0.006501 | 0.002604 | 2.5   | 3.56E-02 | 8.38E-02 |
| 364 | miR-942STAR(1) | 0.000470 | 0.000095 | 6.0   | 3.68E-02 | 8.63E-02 |
| 365 | miR-125b-2STA  | 0.025673 | 0.048855 | -1.9  | 3.83E-02 | 8.95E-02 |
| 366 | miR-2681(1)    | 0.000016 | 0.000099 | -5.2  | 3.83E-02 | 8.95E-02 |
| 367 | miR-561STAR(1) | 0.000452 | 0.000096 | 4.2   | 3.92E-02 | 9.14E-02 |
| 368 | miR-497STAR(1) | 0.000678 | 0.003297 | -4.8  | 4.00E-02 | 9.28E-02 |
| 369 | miR-204STAR(1) | 0.000010 | 0.000115 | -7.0  | 4.05E-02 | 9.38E-02 |
| 370 | miR-208a(1)    | 0.000029 | 0.000636 | -18.1 | 4.14E-02 | 9.55E-02 |
| 371 | miR-3138-3p(1) | 0.000214 | 0.000029 | 5.9   | 4.16E-02 | 9.59E-02 |
| 372 | miR-4766(1)    | 0.000441 | 0.000068 | 5.7   | 4.22E-02 | 9.69E-02 |
| 373 | miR-2110STAR   | 0.000048 | 0.000354 | -7.0  | 4.32E-02 | 9.90E-02 |
| 374 | miR-411STAR(1) | 0.006913 | 0.001595 | 4.3   | 4.52E-02 | 1.03E-01 |
| 375 | miR-92a-1STAF  | 0.001474 | 0.000571 | 2.6   | 4.53E-02 | 1.03E-01 |
| 376 | miR-134(1)     | 0.048199 | 0.022972 | 2.1   | 4.56E-02 | 1.04E-01 |
| 377 | miR-301aSTAR   | 0.000725 | 0.000148 | 4.5   | 4.58E-02 | 1.04E-01 |
| 378 | miR-642-5p(1)  | 0.000000 | 0.000107 | -20.8 | 4.73E-02 | 1.07E-01 |
| 379 | miR-323a(1)    | 0.009655 | 0.002540 | 3.8   | 4.74E-02 | 1.07E-01 |
| 380 | miR-521(2)     | 0.000623 | 0.000208 | 3.5   | 4.82E-02 | 1.08E-01 |
| 381 | miR-4690(1)    | 0.000029 | 0.000130 | -4.1  | 4.84E-02 | 1.09E-01 |
| 382 | miR-1249(1)    | 0.000094 | 0.000595 | -6.1  | 4.85E-02 | 1.09E-01 |
| 383 | miR-139STAR(1) | 0.001880 | 0.005757 | -3.1  | 4.88E-02 | 1.09E-01 |
| 384 | miR-3200STAR   | 0.000322 | 0.000083 | 3.5   | 4.92E-02 | 1.10E-01 |
| 385 | miR-665STAR(1) | 0.000019 | 0.000117 | -4.3  | 4.94E-02 | 1.10E-01 |
| 386 | miR-2467(1)    | 0.000078 | 0.000004 | 8.3   | 5.04E-02 | 1.11E-01 |
| 387 | miR-652STAR(1) | 0.001036 | 0.004870 | -4.7  | 5.11E-02 | 1.13E-01 |
| 388 | miR-520g-5p(2) | 0.000045 | 0.000000 | 9.6   | 5.13E-02 | 1.13E-01 |
| 389 | miR-544-3p(1)  | 0.001375 | 0.000345 | 3.7   | 5.16E-02 | 1.13E-01 |
| 390 | let-7gSTAR(1)  | 0.000629 | 0.001791 | -2.8  | 5.22E-02 | 1.14E-01 |

|     | A              | B        | C        | D    | E        | F        |
|-----|----------------|----------|----------|------|----------|----------|
| 391 | miR-365-2STAR  | 0.000888 | 0.000187 | 4.9  | 5.29E-02 | 1.15E-01 |
| 392 | miR-577(1)     | 0.000016 | 0.000088 | -4.7 | 5.38E-02 | 1.17E-01 |
| 393 | miR-212-3p(1)  | 0.002130 | 0.000972 | 2.2  | 5.39E-02 | 1.17E-01 |
| 394 | miR-99bSTAR(1) | 0.012171 | 0.006728 | 1.8  | 5.49E-02 | 1.19E-01 |
| 395 | miR-3177(1)    | 0.000238 | 0.000065 | 3.6  | 5.56E-02 | 1.20E-01 |
| 396 | miR-1908-3p(1) | 0.000132 | 0.000010 | 7.9  | 5.58E-02 | 1.20E-01 |
| 397 | miR-27bSTAR(1) | 0.010832 | 0.025288 | -2.3 | 5.62E-02 | 1.21E-01 |
| 398 | miR-676(1)     | 0.000057 | 0.000290 | -5.4 | 5.74E-02 | 1.23E-01 |
| 399 | miR-494(1)     | 0.067378 | 0.018462 | 3.6  | 5.75E-02 | 1.23E-01 |
| 400 | miR-18bSTAR(1) | 0.000000 | 0.000024 | -6.6 | 5.75E-02 | 1.23E-01 |
| 401 | miR-3928(1)    | 0.000052 | 0.000280 | -4.9 | 5.82E-02 | 1.24E-01 |
| 402 | miR-374b(1)    | 0.153061 | 0.070434 | 2.2  | 6.10E-02 | 1.29E-01 |
| 403 | let-7c(1)      | 0.339364 | 1.074958 | -3.2 | 6.11E-02 | 1.29E-01 |
| 404 | miR-219-5p(2)  | 0.000233 | 0.001526 | -6.5 | 6.16E-02 | 1.30E-01 |
| 405 | miR-20aSTAR(1) | 0.015613 | 0.007158 | 2.2  | 6.35E-02 | 1.34E-01 |
| 406 | miR-423-3p(1)  | 0.134014 | 0.242042 | -1.8 | 6.36E-02 | 1.34E-01 |
| 407 | miR-556-3p(1)  | 0.000522 | 0.000097 | 5.8  | 6.44E-02 | 1.35E-01 |
| 408 | miR-570-5p(1)  | 0.000101 | 0.000348 | -3.3 | 6.61E-02 | 1.38E-01 |
| 409 | miR-1303(1)    | 0.000477 | 0.000172 | 2.7  | 6.65E-02 | 1.39E-01 |
| 410 | miR-376bSTAR   | 0.001577 | 0.003442 | -2.2 | 6.68E-02 | 1.39E-01 |
| 411 | miR-5094-5p(1) | 0.000091 | 0.000006 | 8.9  | 7.05E-02 | 1.46E-01 |
| 412 | miR-139(1)     | 0.013133 | 0.029298 | -2.2 | 7.06E-02 | 1.46E-01 |
| 413 | miR-125aSTAR   | 0.011450 | 0.004496 | 2.6  | 7.12E-02 | 1.47E-01 |
| 414 | miR-2276-3p(1) | 0.000204 | 0.000031 | 5.7  | 7.18E-02 | 1.48E-01 |
| 415 | miR-1468(1)    | 0.000127 | 0.000497 | -3.8 | 7.20E-02 | 1.48E-01 |
| 416 | miR-376a-A6G   | 0.035048 | 0.140231 | -4.0 | 7.21E-02 | 1.48E-01 |
| 417 | miR-372(1)     | 0.000049 | 0.000242 | -5.3 | 7.28E-02 | 1.49E-01 |
| 418 | miR-545-5p(1)  | 0.001633 | 0.000553 | 2.9  | 7.31E-02 | 1.49E-01 |
| 419 | miR-135a-2STA  | 0.000000 | 0.000028 | -7.5 | 7.35E-02 | 1.50E-01 |
| 420 | miR-579-5p(1)  | 0.000505 | 0.000127 | 4.0  | 7.38E-02 | 1.50E-01 |

|     | A                | B        | C        | D     | E        | F        |
|-----|------------------|----------|----------|-------|----------|----------|
| 421 | miR-103(2)       | 3.522084 | 1.739549 | 2.0   | 7.42E-02 | 1.50E-01 |
| 422 | miR-1266(1)      | 0.000161 | 0.000035 | 5.0   | 7.44E-02 | 1.51E-01 |
| 423 | miR-376c(1)      | 0.141660 | 0.403952 | -2.9  | 7.53E-02 | 1.52E-01 |
| 424 | miR-1180(1)      | 0.004307 | 0.002373 | 1.8   | 7.90E-02 | 1.59E-01 |
| 425 | miR-449a(1)      | 0.000722 | 0.000257 | 2.9   | 7.92E-02 | 1.59E-01 |
| 426 | miR-3664-3p(1)   | 0.000000 | 0.000063 | -13.5 | 7.94E-02 | 1.59E-01 |
| 427 | miR-16-1STAR(1)  | 0.006864 | 0.002595 | 2.6   | 8.08E-02 | 1.62E-01 |
| 428 | miR-3612-5p(1)   | 0.000000 | 0.000048 | -8.9  | 8.12E-02 | 1.62E-01 |
| 429 | miR-1228-3p(1)   | 0.000000 | 0.000055 | -12.7 | 8.15E-02 | 1.62E-01 |
| 430 | miR-579-3p(1)    | 0.000524 | 0.000137 | 3.9   | 8.31E-02 | 1.65E-01 |
| 431 | miR-33aSTAR(1)   | 0.001459 | 0.003343 | -2.3  | 8.37E-02 | 1.66E-01 |
| 432 | miR-556-5p(1)    | 0.001001 | 0.000231 | 4.2   | 8.45E-02 | 1.67E-01 |
| 433 | miR-3605-3p(1)   | 0.000091 | 0.000402 | -4.1  | 8.48E-02 | 1.67E-01 |
| 434 | miR-29a(1)       | 1.933365 | 0.747467 | 2.6   | 8.55E-02 | 1.68E-01 |
| 435 | let-7dSTAR(1)    | 0.010052 | 0.017735 | -1.8  | 8.70E-02 | 1.70E-01 |
| 436 | miR-1912-5p(1)   | 0.000069 | 0.000004 | 7.8   | 8.70E-02 | 1.70E-01 |
| 437 | miR-345STAR(1)   | 0.000410 | 0.000094 | 4.0   | 8.73E-02 | 1.70E-01 |
| 438 | miR-3155-5p(1)   | 0.000090 | 0.000021 | 3.6   | 8.73E-02 | 1.70E-01 |
| 439 | miR-197(1)       | 0.015544 | 0.026610 | -1.7  | 8.85E-02 | 1.72E-01 |
| 440 | miR-769(1)       | 0.055396 | 0.033268 | 1.7   | 8.88E-02 | 1.72E-01 |
| 441 | miR-342STAR(1)   | 0.000970 | 0.002756 | -2.8  | 8.98E-02 | 1.74E-01 |
| 442 | let-7g(1)        | 0.663441 | 1.548657 | -2.3  | 9.03E-02 | 1.74E-01 |
| 443 | miR-16(2)        | 1.158165 | 0.485645 | 2.4   | 9.07E-02 | 1.75E-01 |
| 444 | miR-324-3p(1)    | 0.010318 | 0.020069 | -1.9  | 9.12E-02 | 1.75E-01 |
| 445 | miR-1298(1)      | 0.000000 | 0.000023 | -6.6  | 9.14E-02 | 1.75E-01 |
| 446 | miR-668(1)       | 0.000056 | 0.000180 | -3.2  | 9.40E-02 | 1.80E-01 |
| 447 | miR-337(1)       | 0.008074 | 0.018210 | -2.3  | 9.64E-02 | 1.84E-01 |
| 448 | miR-365-1STAR(1) | 0.000166 | 0.000652 | -3.7  | 9.69E-02 | 1.85E-01 |
| 449 | miR-151-5p(1)    | 0.318526 | 0.193463 | 1.6   | 9.71E-02 | 1.85E-01 |
| 450 | miR-655STAR(1)   | 0.000102 | 0.000028 | 3.0   | 1.00E-01 | 1.90E-01 |

|     | A              | B        | C        | D    | E        | F        |
|-----|----------------|----------|----------|------|----------|----------|
| 451 | miR-302a-5p(1) | 0.000013 | 0.000000 | 3.8  | 1.01E-01 | 1.90E-01 |
| 452 | miR-376cSTAR   | 0.001934 | 0.003720 | -1.9 | 1.01E-01 | 1.92E-01 |
| 453 | miR-636STAR(1) | 0.000000 | 0.000043 | -8.0 | 1.02E-01 | 1.92E-01 |
| 454 | miR-376a-3p(2) | 0.026818 | 0.011717 | 2.3  | 1.02E-01 | 1.92E-01 |
| 455 | miR-526b-3p(1) | 0.000459 | 0.000168 | 2.8  | 1.03E-01 | 1.94E-01 |
| 456 | miR-889STAR(1) | 0.000141 | 0.000040 | 3.0  | 1.04E-01 | 1.94E-01 |
| 457 | miR-138-1STAR  | 0.000035 | 0.000135 | -3.0 | 1.04E-01 | 1.94E-01 |
| 458 | miR-32STAR(1)  | 0.003157 | 0.001283 | 2.5  | 1.04E-01 | 1.94E-01 |
| 459 | miR-3074-5p(1) | 0.000041 | 0.000187 | -4.0 | 1.05E-01 | 1.95E-01 |
| 460 | miR-93(1)      | 0.451159 | 0.300083 | 1.5  | 1.07E-01 | 1.99E-01 |
| 461 | miR-643(1)     | 0.000276 | 0.000115 | 2.2  | 1.09E-01 | 2.02E-01 |
| 462 | miR-939-5p(1)  | 0.000259 | 0.000066 | 3.4  | 1.09E-01 | 2.02E-01 |
| 463 | miR-1296(1)    | 0.000953 | 0.001828 | -1.9 | 1.11E-01 | 2.04E-01 |
| 464 | miR-518d-5p(5) | 0.000471 | 0.000157 | 3.1  | 1.13E-01 | 2.08E-01 |
| 465 | miR-95STAR(1)  | 0.000016 | 0.000114 | -6.1 | 1.13E-01 | 2.08E-01 |
| 466 | miR-191STAR(1) | 0.001090 | 0.000335 | 3.1  | 1.14E-01 | 2.08E-01 |
| 467 | miR-505STAR(1) | 0.000990 | 0.000500 | 2.0  | 1.14E-01 | 2.09E-01 |
| 468 | miR-766STAR(1) | 0.000225 | 0.000053 | 3.6  | 1.15E-01 | 2.09E-01 |
| 469 | miR-140STAR(1) | 0.030790 | 0.062430 | -2.0 | 1.15E-01 | 2.10E-01 |
| 470 | miR-1908-5p(1) | 0.000367 | 0.000082 | 3.8  | 1.16E-01 | 2.10E-01 |
| 471 | miR-23a(1)     | 1.019735 | 1.752847 | -1.7 | 1.16E-01 | 2.10E-01 |
| 472 | miR-431-3p(1)  | 0.002131 | 0.001099 | 1.9  | 1.18E-01 | 2.13E-01 |
| 473 | miR-1271(1)    | 0.003610 | 0.006362 | -1.8 | 1.20E-01 | 2.16E-01 |
| 474 | let-7d(1)      | 0.224539 | 0.535645 | -2.4 | 1.21E-01 | 2.18E-01 |
| 475 | miR-1228-5p(1) | 0.000000 | 0.000034 | -8.6 | 1.24E-01 | 2.23E-01 |
| 476 | miR-3136(1)    | 0.000042 | 0.000135 | -2.8 | 1.25E-01 | 2.23E-01 |
| 477 | miR-758(1)     | 0.005289 | 0.002915 | 1.8  | 1.26E-01 | 2.26E-01 |
| 478 | miR-539STAR(1) | 0.002048 | 0.001086 | 1.9  | 1.27E-01 | 2.27E-01 |
| 479 | let-7iSTAR(1)  | 0.008483 | 0.015868 | -1.9 | 1.28E-01 | 2.27E-01 |
| 480 | miR-19b-2STAR  | 0.000000 | 0.000029 | -7.8 | 1.28E-01 | 2.28E-01 |

|     | A               | B        | C        | D    | E        | F        |
|-----|-----------------|----------|----------|------|----------|----------|
| 481 | miR-660STAR(1)  | 0.000218 | 0.000695 | -3.1 | 1.29E-01 | 2.29E-01 |
| 482 | miR-520f-5p(1)  | 0.000055 | 0.000020 | 5.2  | 1.36E-01 | 2.40E-01 |
| 483 | miR-3194-3p(1)  | 0.000338 | 0.000115 | 2.6  | 1.36E-01 | 2.41E-01 |
| 484 | miR-92bSTAR(1)  | 0.001097 | 0.000639 | 1.7  | 1.37E-01 | 2.42E-01 |
| 485 | miR-1284-3p(1)  | 0.000114 | 0.000016 | 4.8  | 1.38E-01 | 2.43E-01 |
| 486 | miR-552-3p(1)   | 0.000000 | 0.000033 | -8.0 | 1.41E-01 | 2.48E-01 |
| 487 | miR-3909(1)     | 0.000653 | 0.000212 | 3.2  | 1.41E-01 | 2.48E-01 |
| 488 | miR-127(1)      | 0.123908 | 0.312605 | -2.5 | 1.42E-01 | 2.48E-01 |
| 489 | miR-136-3p(1)   | 0.014897 | 0.034857 | -2.3 | 1.43E-01 | 2.49E-01 |
| 490 | miR-433STAR(1)  | 0.000674 | 0.000288 | 2.3  | 1.43E-01 | 2.49E-01 |
| 491 | miR-147(1)      | 0.000608 | 0.001994 | -3.2 | 1.43E-01 | 2.49E-01 |
| 492 | miR-181cSTAR(1) | 0.003584 | 0.006388 | -1.8 | 1.45E-01 | 2.51E-01 |
| 493 | miR-1179(1)     | 0.000342 | 0.000134 | 2.3  | 1.45E-01 | 2.51E-01 |
| 494 | miR-421STAR(1)  | 0.000172 | 0.000041 | 3.5  | 1.45E-01 | 2.51E-01 |
| 495 | miR-485-5p(1)   | 0.001968 | 0.005173 | -2.6 | 1.45E-01 | 2.51E-01 |
| 496 | miR-370STAR(1)  | 0.001179 | 0.000643 | 1.8  | 1.46E-01 | 2.51E-01 |
| 497 | miR-17STAR(1)   | 0.138607 | 0.089634 | 1.5  | 1.46E-01 | 2.51E-01 |
| 498 | miR-520e-5p(1)  | 0.000020 | 0.000000 | 4.0  | 1.48E-01 | 2.53E-01 |
| 499 | miR-25STAR(1)   | 0.001305 | 0.000434 | 3.0  | 1.51E-01 | 2.59E-01 |
| 500 | miR-519e-3p(1)  | 0.000080 | 0.000015 | 3.8  | 1.53E-01 | 2.61E-01 |
| 501 | miR-330STAR(1)  | 0.001733 | 0.001091 | 1.6  | 1.53E-01 | 2.61E-01 |
| 502 | miR-186STAR(1)  | 0.000649 | 0.001252 | -1.9 | 1.54E-01 | 2.62E-01 |
| 503 | miR-574-5p(1)   | 0.030324 | 0.019050 | 1.6  | 1.54E-01 | 2.62E-01 |
| 504 | miR-939-3p(1)   | 0.000016 | 0.000063 | -3.7 | 1.55E-01 | 2.63E-01 |
| 505 | miR-4802-5p(1)  | 0.000000 | 0.000026 | -7.0 | 1.56E-01 | 2.64E-01 |
| 506 | miR-146a(1)     | 0.129693 | 0.260436 | -2.0 | 1.58E-01 | 2.66E-01 |
| 507 | let-7eSTAR(1)   | 0.002573 | 0.001491 | 1.7  | 1.58E-01 | 2.66E-01 |
| 508 | miR-1306-5p(1)  | 0.000396 | 0.000743 | -1.9 | 1.59E-01 | 2.66E-01 |
| 509 | miR-1284-5p(1)  | 0.000078 | 0.000013 | 4.0  | 1.59E-01 | 2.66E-01 |
| 510 | miR-517STAR(3)  | 0.000114 | 0.000051 | 4.1  | 1.59E-01 | 2.66E-01 |

|     | A              | B        | C        | D    | E        | F        |
|-----|----------------|----------|----------|------|----------|----------|
| 511 | miR-454STAR(1  | 0.000370 | 0.000150 | 2.4  | 1.61E-01 | 2.68E-01 |
| 512 | miR-518c-5p(1  | 0.000150 | 0.000063 | 3.2  | 1.61E-01 | 2.69E-01 |
| 513 | miR-527STAR(1  | 0.000477 | 0.000118 | 4.2  | 1.63E-01 | 2.70E-01 |
| 514 | miR-542STAR(1  | 0.002082 | 0.005009 | -2.4 | 1.64E-01 | 2.72E-01 |
| 515 | miR-605-5p(1)  | 0.000067 | 0.000026 | 2.2  | 1.64E-01 | 2.72E-01 |
| 516 | miR-3677-5p(1  | 0.000139 | 0.000034 | 3.3  | 1.64E-01 | 2.72E-01 |
| 517 | miR-147STAR(1  | 0.000155 | 0.000069 | 2.3  | 1.68E-01 | 2.77E-01 |
| 518 | miR-33a(1)     | 0.022752 | 0.036658 | -1.6 | 1.69E-01 | 2.78E-01 |
| 519 | let-7f-2STAR(1 | 0.000878 | 0.001577 | -1.8 | 1.69E-01 | 2.78E-01 |
| 520 | miR-3679(1)    | 0.000265 | 0.000105 | 2.5  | 1.70E-01 | 2.78E-01 |
| 521 | miR-493-5p(1)  | 0.007226 | 0.014231 | -2.0 | 1.70E-01 | 2.79E-01 |
| 522 | miR-551a(1)    | 0.000812 | 0.000402 | 2.0  | 1.72E-01 | 2.81E-01 |
| 523 | miR-324-5p(1)  | 0.025220 | 0.043546 | -1.7 | 1.73E-01 | 2.82E-01 |
| 524 | miR-4802-3p(1  | 0.000000 | 0.000016 | -5.1 | 1.73E-01 | 2.82E-01 |
| 525 | miR-494STAR(1  | 0.000211 | 0.000079 | 2.4  | 1.75E-01 | 2.85E-01 |
| 526 | miR-410STAR(1  | 0.000127 | 0.000035 | 3.0  | 1.77E-01 | 2.86E-01 |
| 527 | miR-671-3p(1)  | 0.001653 | 0.000814 | 2.0  | 1.78E-01 | 2.87E-01 |
| 528 | miR-874(1)     | 0.036953 | 0.022289 | 1.7  | 1.78E-01 | 2.87E-01 |
| 529 | miR-106b(1)    | 0.708374 | 0.454747 | 1.6  | 1.80E-01 | 2.90E-01 |
| 530 | miR-4789-3p(1  | 0.000019 | 0.000082 | -3.2 | 1.80E-01 | 2.90E-01 |
| 531 | miR-432STAR(1  | 0.000071 | 0.000187 | -2.6 | 1.82E-01 | 2.92E-01 |
| 532 | miR-3145-3p(1  | 0.000131 | 0.000052 | 2.4  | 1.83E-01 | 2.94E-01 |
| 533 | miR-548bSTAR   | 0.000586 | 0.000198 | 2.7  | 1.86E-01 | 2.97E-01 |
| 534 | miR-1278(1)    | 0.000112 | 0.000028 | 3.3  | 1.86E-01 | 2.97E-01 |
| 535 | let-7a-1STAR(2 | 0.009506 | 0.020190 | -2.1 | 1.90E-01 | 3.03E-01 |
| 536 | miR-146bSTAR   | 0.000264 | 0.000851 | -3.1 | 1.92E-01 | 3.06E-01 |
| 537 | miR-192STAR(1  | 0.000055 | 0.000145 | -2.6 | 1.93E-01 | 3.06E-01 |
| 538 | miR-450a-1STA  | 0.000981 | 0.002140 | -2.2 | 1.93E-01 | 3.06E-01 |
| 539 | miR-433(1)     | 0.001838 | 0.003524 | -1.9 | 1.95E-01 | 3.09E-01 |
| 540 | miR-181a-1STA  | 0.031339 | 0.015151 | 2.1  | 1.98E-01 | 3.12E-01 |

|     | A              | B        | C        | D    | E        | F        |
|-----|----------------|----------|----------|------|----------|----------|
| 541 | miR-487a-5p(1) | 0.000461 | 0.001042 | -2.2 | 1.98E-01 | 3.12E-01 |
| 542 | miR-628-3p(1)  | 0.001856 | 0.000862 | 2.2  | 2.00E-01 | 3.15E-01 |
| 543 | miR-3130-3p(1) | 0.000013 | 0.000059 | -3.7 | 2.01E-01 | 3.16E-01 |
| 544 | miR-625-5p(1)  | 0.006680 | 0.003681 | 1.8  | 2.03E-01 | 3.18E-01 |
| 545 | miR-551aSTAR   | 0.000013 | 0.000000 | 3.8  | 2.05E-01 | 3.21E-01 |
| 546 | miR-187STAR(1) | 0.000000 | 0.000020 | -6.0 | 2.08E-01 | 3.25E-01 |
| 547 | miR-597(1)     | 0.000152 | 0.000437 | -2.9 | 2.09E-01 | 3.27E-01 |
| 548 | miR-22(1)      | 3.122319 | 1.986774 | 1.6  | 2.10E-01 | 3.27E-01 |
| 549 | miR-27aSTAR(1) | 0.049625 | 0.028133 | 1.8  | 2.11E-01 | 3.28E-01 |
| 550 | miR-22STAR(1)  | 0.019617 | 0.009502 | 2.1  | 2.12E-01 | 3.28E-01 |
| 551 | miR-34bSTAR(1) | 0.000032 | 0.000138 | -3.6 | 2.13E-01 | 3.29E-01 |
| 552 | miR-544-5p(1)  | 0.001066 | 0.000534 | 2.0  | 2.16E-01 | 3.34E-01 |
| 553 | miR-92b(1)     | 0.009813 | 0.006344 | 1.5  | 2.21E-01 | 3.40E-01 |
| 554 | miR-3691(1)    | 0.000168 | 0.000050 | 3.0  | 2.21E-01 | 3.40E-01 |
| 555 | miR-224STAR(1) | 0.002330 | 0.005748 | -2.5 | 2.22E-01 | 3.40E-01 |
| 556 | miR-3064-3p(1) | 0.000022 | 0.000078 | -2.6 | 2.22E-01 | 3.40E-01 |
| 557 | miR-3130-5p(1) | 0.000054 | 0.000165 | -2.8 | 2.24E-01 | 3.43E-01 |
| 558 | miR-519a-3p(2) | 0.002423 | 0.001375 | 1.8  | 2.31E-01 | 3.53E-01 |
| 559 | miR-212-5p(1)  | 0.000793 | 0.000483 | 1.6  | 2.36E-01 | 3.60E-01 |
| 560 | miR-412(1)     | 0.002648 | 0.001327 | 2.0  | 2.41E-01 | 3.67E-01 |
| 561 | miR-641-5p(1)  | 0.000887 | 0.000446 | 2.0  | 2.44E-01 | 3.70E-01 |
| 562 | miR-561(1)     | 0.000246 | 0.000444 | -1.8 | 2.55E-01 | 3.87E-01 |
| 563 | miR-1264(1)    | 0.000000 | 0.000031 | -4.8 | 2.55E-01 | 3.87E-01 |
| 564 | miR-454(1)     | 0.012588 | 0.008294 | 1.5  | 2.56E-01 | 3.87E-01 |
| 565 | miR-517a(2)    | 0.003129 | 0.002021 | 1.6  | 2.57E-01 | 3.88E-01 |
| 566 | miR-24(2)      | 4.404328 | 6.159087 | -1.4 | 2.58E-01 | 3.88E-01 |
| 567 | miR-18b(1)     | 0.002198 | 0.001321 | 1.7  | 2.58E-01 | 3.88E-01 |
| 568 | miR-1307-3p(1) | 0.021928 | 0.013433 | 1.6  | 2.59E-01 | 3.89E-01 |
| 569 | miR-331(1)     | 0.017247 | 0.025131 | -1.5 | 2.59E-01 | 3.89E-01 |
| 570 | miR-766(1)     | 0.002302 | 0.001239 | 1.9  | 2.62E-01 | 3.92E-01 |



|     | A               | B        | C        | D    | E        | F        |
|-----|-----------------|----------|----------|------|----------|----------|
| 571 | miR-195(1)      | 0.135347 | 0.280148 | -2.1 | 2.64E-01 | 3.94E-01 |
| 572 | let-7cSTAR(1)   | 0.001897 | 0.001228 | 1.5  | 2.68E-01 | 3.99E-01 |
| 573 | miR-520a-5p(1)  | 0.000561 | 0.000300 | 2.0  | 2.70E-01 | 4.02E-01 |
| 574 | miR-518f-3p(1)  | 0.000168 | 0.000290 | -1.6 | 2.71E-01 | 4.03E-01 |
| 575 | miR-4804STAR    | 0.000380 | 0.000156 | 2.4  | 2.72E-01 | 4.04E-01 |
| 576 | miR-1911(1)     | 0.000000 | 0.000009 | -3.0 | 2.73E-01 | 4.04E-01 |
| 577 | miR-570-3p(1)   | 0.002235 | 0.001044 | 2.2  | 2.88E-01 | 4.26E-01 |
| 578 | miR-365(2)      | 0.044641 | 0.075080 | -1.7 | 2.89E-01 | 4.27E-01 |
| 579 | miR-499(1)      | 0.001097 | 0.002963 | -2.7 | 2.90E-01 | 4.27E-01 |
| 580 | miR-26a-2STAR   | 0.002184 | 0.004187 | -1.9 | 2.91E-01 | 4.28E-01 |
| 581 | miR-656(1)      | 0.006564 | 0.004080 | 1.6  | 2.93E-01 | 4.30E-01 |
| 582 | miR-1537(1)     | 0.000079 | 0.000157 | -2.1 | 2.96E-01 | 4.33E-01 |
| 583 | miR-30c(2)      | 0.261328 | 0.359491 | -1.4 | 2.97E-01 | 4.34E-01 |
| 584 | miR-194-2STAR   | 0.000045 | 0.000115 | -2.1 | 2.99E-01 | 4.36E-01 |
| 585 | miR-495(1)      | 0.042884 | 0.027856 | 1.5  | 2.99E-01 | 4.36E-01 |
| 586 | miR-181a-2STA   | 0.010723 | 0.018239 | -1.7 | 3.02E-01 | 4.40E-01 |
| 587 | miR-3919-3p(1)  | 0.000025 | 0.000007 | 2.3  | 3.05E-01 | 4.43E-01 |
| 588 | miR-10a(1)      | 0.300234 | 0.169668 | 1.8  | 3.05E-01 | 4.43E-01 |
| 589 | miR-381STAR(1)  | 0.000517 | 0.001014 | -1.9 | 3.07E-01 | 4.45E-01 |
| 590 | miR-33b(1)      | 0.003375 | 0.006140 | -1.8 | 3.08E-01 | 4.45E-01 |
| 591 | miR-1255a-5p(1) | 0.000674 | 0.000419 | 1.7  | 3.12E-01 | 4.51E-01 |
| 592 | miR-432(1)      | 0.011489 | 0.007788 | 1.5  | 3.13E-01 | 4.51E-01 |
| 593 | miR-30e(1)      | 0.532737 | 0.816467 | -1.5 | 3.15E-01 | 4.53E-01 |
| 594 | miR-15a(1)      | 0.102311 | 0.156179 | -1.5 | 3.22E-01 | 4.62E-01 |
| 595 | miR-3146(1)     | 0.000094 | 0.000059 | 2.0  | 3.22E-01 | 4.62E-01 |
| 596 | miR-340STAR(1)  | 0.002022 | 0.001439 | 1.4  | 3.23E-01 | 4.62E-01 |
| 597 | miR-10b(1)      | 0.546615 | 1.007341 | -1.8 | 3.24E-01 | 4.62E-01 |
| 598 | miR-519c-3p(1)  | 0.000136 | 0.000087 | 1.8  | 3.28E-01 | 4.68E-01 |
| 599 | miR-3613(1)     | 0.010988 | 0.015455 | -1.4 | 3.30E-01 | 4.69E-01 |
| 600 | miR-371STAR(1)  | 0.000000 | 0.000009 | -3.5 | 3.30E-01 | 4.69E-01 |

|     | A              | B        | C        | D    | E        | F        |
|-----|----------------|----------|----------|------|----------|----------|
| 601 | miR-29cSTAR(1) | 0.004495 | 0.007987 | -1.8 | 3.31E-01 | 4.69E-01 |
| 602 | miR-411(1)     | 0.056897 | 0.032912 | 1.7  | 3.32E-01 | 4.70E-01 |
| 603 | miR-122(1)     | 0.000254 | 0.000138 | 1.7  | 3.38E-01 | 4.78E-01 |
| 604 | miR-100(1)     | 2.085332 | 1.357119 | 1.5  | 3.46E-01 | 4.88E-01 |
| 605 | miR-381(1)     | 0.099865 | 0.052020 | 1.9  | 3.47E-01 | 4.89E-01 |
| 606 | miR-4772-3p(1) | 0.000058 | 0.000107 | -1.8 | 3.49E-01 | 4.90E-01 |
| 607 | miR-5193(1)    | 0.000013 | 0.000047 | -2.4 | 3.49E-01 | 4.90E-01 |
| 608 | miR-624-3p(1)  | 0.000745 | 0.000366 | 2.0  | 3.51E-01 | 4.92E-01 |
| 609 | miR-769STAR(1) | 0.001671 | 0.001108 | 1.5  | 3.53E-01 | 4.94E-01 |
| 610 | miR-130aSTAR   | 0.001374 | 0.002516 | -1.8 | 3.54E-01 | 4.94E-01 |
| 611 | miR-330(1)     | 0.012319 | 0.009389 | 1.3  | 3.54E-01 | 4.94E-01 |
| 612 | miR-605-3p(1)  | 0.000056 | 0.000131 | -2.3 | 3.55E-01 | 4.94E-01 |
| 613 | miR-526a-1-3p  | 0.000000 | 0.000026 | -3.5 | 3.56E-01 | 4.95E-01 |
| 614 | miR-887STAR(1) | 0.000419 | 0.000216 | 1.9  | 3.57E-01 | 4.95E-01 |
| 615 | miR-2116STAR   | 0.000111 | 0.000043 | 2.2  | 3.63E-01 | 5.03E-01 |
| 616 | miR-543STAR(1) | 0.000657 | 0.000405 | 1.6  | 3.64E-01 | 5.04E-01 |
| 617 | miR-186(1)     | 0.587860 | 0.435912 | 1.3  | 3.67E-01 | 5.07E-01 |
| 618 | miR-548b(1)    | 0.000366 | 0.000534 | -1.5 | 3.68E-01 | 5.08E-01 |
| 619 | miR-452STAR(1) | 0.019232 | 0.013916 | 1.4  | 3.69E-01 | 5.08E-01 |
| 620 | miR-93STAR(1)  | 0.004309 | 0.005906 | -1.4 | 3.70E-01 | 5.09E-01 |
| 621 | miR-105STAR(2) | 0.000000 | 0.000008 | -2.9 | 3.76E-01 | 5.16E-01 |
| 622 | miR-30bSTAR(1) | 0.000819 | 0.001474 | -1.8 | 3.81E-01 | 5.22E-01 |
| 623 | miR-3157-5p(1) | 0.000048 | 0.000119 | -2.3 | 3.87E-01 | 5.30E-01 |
| 624 | miR-656STAR(1) | 0.000196 | 0.000104 | 1.7  | 3.91E-01 | 5.34E-01 |
| 625 | miR-215(1)     | 0.000381 | 0.000782 | -1.9 | 3.92E-01 | 5.35E-01 |
| 626 | miR-409-5p(1)  | 0.011837 | 0.008299 | 1.4  | 3.94E-01 | 5.36E-01 |
| 627 | miR-2114(1)    | 0.000078 | 0.000151 | -1.9 | 3.97E-01 | 5.40E-01 |
| 628 | miR-3620-3p(1) | 0.000180 | 0.000097 | 1.8  | 3.98E-01 | 5.40E-01 |
| 629 | miR-450bSTAR   | 0.000117 | 0.000199 | -1.8 | 3.99E-01 | 5.40E-01 |
| 630 | miR-518e-3p(1) | 0.001339 | 0.000881 | 1.6  | 4.01E-01 | 5.43E-01 |

|     | A             | B        | C        | D    | E        | F        |
|-----|---------------|----------|----------|------|----------|----------|
| 631 | miR-1287STAR  | 0.000328 | 0.000628 | -1.9 | 4.02E-01 | 5.43E-01 |
| 632 | miR-767STAR(1 | 0.000000 | 0.000007 | -2.7 | 4.03E-01 | 5.43E-01 |
| 633 | miR-484(1)    | 0.027275 | 0.021025 | 1.3  | 4.03E-01 | 5.43E-01 |
| 634 | miR-874STAR(1 | 0.001175 | 0.001778 | -1.5 | 4.03E-01 | 5.43E-01 |
| 635 | miR-450a-2STA | 0.000663 | 0.001245 | -1.9 | 4.04E-01 | 5.43E-01 |
| 636 | miR-3613STAR  | 0.001037 | 0.001825 | -1.7 | 4.05E-01 | 5.43E-01 |
| 637 | miR-519d(1)   | 0.000668 | 0.000522 | 1.3  | 4.07E-01 | 5.44E-01 |
| 638 | miR-185(1)    | 0.081003 | 0.106179 | -1.3 | 4.08E-01 | 5.45E-01 |
| 639 | miR-1269(1)   | 0.000000 | 0.000023 | -3.3 | 4.14E-01 | 5.52E-01 |
| 640 | miR-181c(1)   | 0.022474 | 0.031415 | -1.4 | 4.14E-01 | 5.52E-01 |
| 641 | miR-629(1)    | 0.010692 | 0.014654 | -1.4 | 4.15E-01 | 5.52E-01 |
| 642 | miR-424STAR(1 | 0.012958 | 0.020505 | -1.6 | 4.16E-01 | 5.52E-01 |
| 643 | miR-32(1)     | 0.033952 | 0.022541 | 1.5  | 4.20E-01 | 5.57E-01 |
| 644 | miR-519e-5p(1 | 0.000236 | 0.000103 | 2.0  | 4.23E-01 | 5.61E-01 |
| 645 | miR-2277-3p(1 | 0.000025 | 0.000055 | -2.1 | 4.25E-01 | 5.62E-01 |
| 646 | miR-518c-3p(1 | 0.001771 | 0.001287 | 1.4  | 4.26E-01 | 5.62E-01 |
| 647 | miR-24-2STAR( | 0.055577 | 0.039122 | 1.4  | 4.31E-01 | 5.68E-01 |
| 648 | miR-942(1)    | 0.001052 | 0.000797 | 1.3  | 4.32E-01 | 5.68E-01 |
| 649 | miR-487b(1)   | 0.020573 | 0.028308 | -1.4 | 4.33E-01 | 5.68E-01 |
| 650 | miR-1307-5p(1 | 0.036772 | 0.048654 | -1.3 | 4.33E-01 | 5.68E-01 |
| 651 | miR-190b(1)   | 0.000710 | 0.001023 | -1.4 | 4.34E-01 | 5.68E-01 |
| 652 | miR-455-3p(1) | 0.078980 | 0.103256 | -1.3 | 4.34E-01 | 5.68E-01 |
| 653 | miR-181a(2)   | 0.558622 | 0.714227 | -1.3 | 4.37E-01 | 5.69E-01 |
| 654 | miR-503STAR(1 | 0.000440 | 0.000302 | 1.4  | 4.37E-01 | 5.69E-01 |
| 655 | miR-329STAR(2 | 0.000212 | 0.000139 | 1.5  | 4.38E-01 | 5.69E-01 |
| 656 | miR-302d(1)   | 0.000000 | 0.000005 | -2.0 | 4.38E-01 | 5.69E-01 |
| 657 | miR-452(1)    | 0.102298 | 0.083638 | 1.2  | 4.40E-01 | 5.71E-01 |
| 658 | miR-370(1)    | 0.007455 | 0.010611 | -1.4 | 4.50E-01 | 5.83E-01 |
| 659 | miR-3065-3p(1 | 0.000152 | 0.000265 | -1.8 | 4.53E-01 | 5.86E-01 |
| 660 | miR-744(1)    | 0.035580 | 0.028298 | 1.3  | 4.55E-01 | 5.88E-01 |

|     | A               | B        | C        | D    | E        | F        |
|-----|-----------------|----------|----------|------|----------|----------|
| 661 | miR-524(1)      | 0.000802 | 0.000567 | 1.5  | 4.60E-01 | 5.93E-01 |
| 662 | miR-98STAR(1)   | 0.001770 | 0.001342 | 1.3  | 4.65E-01 | 5.98E-01 |
| 663 | miR-518b-5p(1)  | 0.000025 | 0.000007 | 2.3  | 4.65E-01 | 5.98E-01 |
| 664 | miR-654STAR(1)  | 0.004673 | 0.005910 | -1.3 | 4.67E-01 | 6.00E-01 |
| 665 | miR-1912-3p(1)  | 0.000000 | 0.000005 | -2.1 | 4.69E-01 | 6.02E-01 |
| 666 | miR-134STAR(1)  | 0.000197 | 0.000291 | -1.5 | 4.72E-01 | 6.04E-01 |
| 667 | miR-4638-3p(1)  | 0.000160 | 0.000110 | 1.6  | 4.73E-01 | 6.04E-01 |
| 668 | miR-629STAR(1)  | 0.000935 | 0.000540 | 1.7  | 4.74E-01 | 6.05E-01 |
| 669 | miR-188STAR(1)  | 0.000713 | 0.001280 | -1.8 | 4.75E-01 | 6.05E-01 |
| 670 | miR-520d-5p(1)  | 0.000877 | 0.000638 | 1.5  | 4.75E-01 | 6.05E-01 |
| 671 | miR-2116(1)     | 0.000183 | 0.000108 | 1.8  | 4.76E-01 | 6.05E-01 |
| 672 | miR-1287(1)     | 0.002381 | 0.001770 | 1.3  | 4.81E-01 | 6.10E-01 |
| 673 | miR-3064-5p(1)  | 0.000130 | 0.000247 | -1.8 | 4.83E-01 | 6.12E-01 |
| 674 | miR-127STAR(1)  | 0.084256 | 0.127645 | -1.5 | 4.88E-01 | 6.17E-01 |
| 675 | miR-627-3p(1)   | 0.000389 | 0.000551 | -1.4 | 4.90E-01 | 6.19E-01 |
| 676 | miR-516STAR(4)  | 0.000082 | 0.000057 | 1.6  | 4.93E-01 | 6.21E-01 |
| 677 | miR-1255a-3p(1) | 0.000093 | 0.000063 | 1.5  | 4.99E-01 | 6.28E-01 |
| 678 | miR-23aSTAR(1)  | 0.000893 | 0.000540 | 1.7  | 5.06E-01 | 6.37E-01 |
| 679 | miR-615STAR(1)  | 0.000824 | 0.000613 | 1.3  | 5.08E-01 | 6.38E-01 |
| 680 | miR-146aSTAR    | 0.000725 | 0.001073 | -1.5 | 5.09E-01 | 6.38E-01 |
| 681 | let-7f-1STAR(1) | 0.001755 | 0.002216 | -1.3 | 5.13E-01 | 6.42E-01 |
| 682 | miR-659(1)      | 0.000278 | 0.000161 | 1.7  | 5.16E-01 | 6.45E-01 |
| 683 | miR-3173(1)     | 0.000098 | 0.000074 | 1.6  | 5.19E-01 | 6.46E-01 |
| 684 | miR-550a-3-5p   | 0.000010 | 0.000027 | -1.9 | 5.19E-01 | 6.46E-01 |
| 685 | miR-1276STAR    | 0.000033 | 0.000023 | 2.0  | 5.20E-01 | 6.47E-01 |
| 686 | miR-335-3p(1)   | 0.006347 | 0.007702 | -1.2 | 5.20E-01 | 6.47E-01 |
| 687 | miR-148b(1)     | 0.479972 | 0.583764 | -1.2 | 5.21E-01 | 6.47E-01 |
| 688 | miR-498STAR(1)  | 0.000016 | 0.000003 | 2.0  | 5.23E-01 | 6.48E-01 |
| 689 | miR-107(1)      | 0.130558 | 0.107598 | 1.2  | 5.29E-01 | 6.54E-01 |
| 690 | miR-337STAR(1)  | 0.001965 | 0.003158 | -1.6 | 5.31E-01 | 6.57E-01 |

|     | A              | B        | C        | D    | E        | F        |
|-----|----------------|----------|----------|------|----------|----------|
| 691 | miR-1292(1)    | 0.000930 | 0.000656 | 1.4  | 5.33E-01 | 6.58E-01 |
| 692 | miR-520b-3p(2) | 0.000174 | 0.000257 | -1.4 | 5.37E-01 | 6.61E-01 |
| 693 | miR-208b(1)    | 0.000162 | 0.000067 | 2.2  | 5.38E-01 | 6.62E-01 |
| 694 | miR-373STAR(1) | 0.000000 | 0.000003 | -1.9 | 5.46E-01 | 6.70E-01 |
| 695 | miR-4772-5p(1) | 0.000112 | 0.000077 | 1.4  | 5.53E-01 | 6.78E-01 |
| 696 | miR-371(1)     | 0.000033 | 0.000048 | -1.8 | 5.56E-01 | 6.80E-01 |
| 697 | miR-651(1)     | 0.003371 | 0.002692 | 1.3  | 5.56E-01 | 6.80E-01 |
| 698 | miR-299-3p(1)  | 0.008682 | 0.005897 | 1.5  | 5.58E-01 | 6.82E-01 |
| 699 | miR-521-1STAR  | 0.000036 | 0.000012 | 1.8  | 5.66E-01 | 6.90E-01 |
| 700 | miR-1256-3p(1) | 0.000116 | 0.000080 | 1.7  | 5.68E-01 | 6.91E-01 |
| 701 | miR-5187-3p(1) | 0.000131 | 0.000081 | 1.6  | 5.69E-01 | 6.92E-01 |
| 702 | miR-132STAR(1) | 0.002670 | 0.002129 | 1.3  | 5.73E-01 | 6.95E-01 |
| 703 | miR-576-5p(1)  | 0.001538 | 0.002288 | -1.5 | 5.74E-01 | 6.95E-01 |
| 704 | miR-1271STAR   | 0.000301 | 0.000200 | 1.5  | 5.74E-01 | 6.95E-01 |
| 705 | miR-3944-3p(1) | 0.000025 | 0.000012 | 1.7  | 5.76E-01 | 6.97E-01 |
| 706 | miR-598(1)     | 0.003414 | 0.004197 | -1.2 | 5.78E-01 | 6.98E-01 |
| 707 | miR-576-3p(1)  | 0.001993 | 0.002710 | -1.4 | 5.80E-01 | 6.99E-01 |
| 708 | miR-1301(1)    | 0.002993 | 0.002428 | 1.2  | 5.81E-01 | 6.99E-01 |
| 709 | miR-152STAR(1) | 0.000520 | 0.000680 | -1.3 | 5.82E-01 | 6.99E-01 |
| 710 | miR-299-5p(1)  | 0.018695 | 0.024095 | -1.3 | 5.82E-01 | 6.99E-01 |
| 711 | miR-2114STAR   | 0.000035 | 0.000087 | -1.8 | 5.88E-01 | 7.05E-01 |
| 712 | miR-369(1)     | 0.046883 | 0.038361 | 1.2  | 5.91E-01 | 7.08E-01 |
| 713 | miR-373(1)     | 0.000058 | 0.000087 | -1.5 | 5.99E-01 | 7.15E-01 |
| 714 | miR-520f-3p(1) | 0.000204 | 0.000158 | 1.3  | 5.99E-01 | 7.15E-01 |
| 715 | miR-502STAR(1) | 0.001005 | 0.001356 | -1.4 | 6.00E-01 | 7.15E-01 |
| 716 | miR-641-3p(1)  | 0.000103 | 0.000078 | 1.4  | 6.01E-01 | 7.15E-01 |
| 717 | miR-1250(1)    | 0.000113 | 0.000060 | 1.6  | 6.01E-01 | 7.15E-01 |
| 718 | miR-377STAR(1) | 0.004065 | 0.005113 | -1.3 | 6.02E-01 | 7.15E-01 |
| 719 | miR-590-5p(1)  | 0.008245 | 0.005960 | 1.4  | 6.09E-01 | 7.19E-01 |
| 720 | miR-937(1)     | 0.000135 | 0.000083 | 1.6  | 6.09E-01 | 7.19E-01 |

|     | A              | B        | C        | D    | E        | F        |
|-----|----------------|----------|----------|------|----------|----------|
| 721 | miR-522-3p(1)  | 0.000107 | 0.000180 | -1.3 | 6.09E-01 | 7.19E-01 |
| 722 | miR-524STAR(1) | 0.000099 | 0.000064 | 1.5  | 6.10E-01 | 7.19E-01 |
| 723 | miR-4504(1)    | 0.000045 | 0.000040 | 1.4  | 6.10E-01 | 7.19E-01 |
| 724 | miR-523-3p(1)  | 0.000121 | 0.000095 | 1.4  | 6.16E-01 | 7.26E-01 |
| 725 | miR-1296STAR   | 0.000148 | 0.000205 | -1.5 | 6.25E-01 | 7.34E-01 |
| 726 | miR-5187-5p(1) | 0.000123 | 0.000081 | 1.6  | 6.26E-01 | 7.35E-01 |
| 727 | miR-580(1)     | 0.000172 | 0.000128 | 1.4  | 6.46E-01 | 7.57E-01 |
| 728 | miR-4326(1)    | 0.000409 | 0.000296 | 1.3  | 6.47E-01 | 7.57E-01 |
| 729 | miR-3158STAR   | 0.000043 | 0.000072 | -1.6 | 6.48E-01 | 7.58E-01 |
| 730 | miR-760(1)     | 0.007484 | 0.006257 | 1.2  | 6.57E-01 | 7.67E-01 |
| 731 | miR-2277-5p(1) | 0.000845 | 0.000623 | 1.4  | 6.59E-01 | 7.68E-01 |
| 732 | miR-218-1STAR  | 0.003097 | 0.004024 | -1.3 | 6.60E-01 | 7.69E-01 |
| 733 | miR-525-3p(1)  | 0.000168 | 0.000250 | -1.4 | 6.62E-01 | 7.70E-01 |
| 734 | miR-1227(1)    | 0.000119 | 0.000089 | 1.4  | 6.68E-01 | 7.76E-01 |
| 735 | miR-597STAR(1) | 0.000103 | 0.000081 | 1.3  | 6.71E-01 | 7.78E-01 |
| 736 | miR-744STAR(1) | 0.000438 | 0.000563 | -1.3 | 6.75E-01 | 7.82E-01 |
| 737 | miR-106bSTAR   | 0.020305 | 0.017509 | 1.2  | 6.77E-01 | 7.82E-01 |
| 738 | miR-616-5p(1)  | 0.000259 | 0.000179 | 1.4  | 6.77E-01 | 7.82E-01 |
| 739 | miR-592(1)     | 0.000124 | 0.000159 | -1.2 | 6.78E-01 | 7.82E-01 |
| 740 | miR-520d-3p(1) | 0.000220 | 0.000202 | 1.3  | 6.82E-01 | 7.84E-01 |
| 741 | miR-665(1)     | 0.015447 | 0.011994 | 1.3  | 6.82E-01 | 7.84E-01 |
| 742 | miR-624-5p(1)  | 0.000368 | 0.000254 | 1.4  | 6.83E-01 | 7.84E-01 |
| 743 | miR-196bSTAR   | 0.000698 | 0.000848 | -1.2 | 6.84E-01 | 7.84E-01 |
| 744 | miR-550-3p(3)  | 0.000711 | 0.000880 | -1.3 | 6.87E-01 | 7.87E-01 |
| 745 | miR-1306-3p(1) | 0.000416 | 0.000340 | 1.2  | 6.91E-01 | 7.90E-01 |
| 746 | miR-329(2)     | 0.005878 | 0.005049 | 1.2  | 6.91E-01 | 7.90E-01 |
| 747 | miR-4473-5p(1) | 0.000061 | 0.000036 | 1.4  | 6.98E-01 | 7.96E-01 |
| 748 | miR-655(1)     | 0.014423 | 0.011449 | 1.3  | 7.00E-01 | 7.97E-01 |
| 749 | miR-409-3p(1)  | 0.050898 | 0.039162 | 1.3  | 7.02E-01 | 7.98E-01 |
| 750 | miR-512-5p(2)  | 0.000172 | 0.000195 | -1.2 | 7.03E-01 | 7.98E-01 |

|     | A              | B        | C        | D    | E        | F        |
|-----|----------------|----------|----------|------|----------|----------|
| 751 | miR-518a-5p(3  | 0.002449 | 0.001947 | 1.3  | 7.03E-01 | 7.98E-01 |
| 752 | miR-379(1)     | 0.052670 | 0.044907 | 1.2  | 7.06E-01 | 8.00E-01 |
| 753 | miR-933(1)     | 0.000051 | 0.000032 | 1.4  | 7.07E-01 | 8.00E-01 |
| 754 | miR-515STAR(2  | 0.000866 | 0.000669 | 1.3  | 7.08E-01 | 8.00E-01 |
| 755 | let-7i(1)      | 2.174036 | 1.893000 | 1.1  | 7.11E-01 | 8.02E-01 |
| 756 | miR-339-5p(1)  | 0.009242 | 0.008251 | 1.1  | 7.15E-01 | 8.06E-01 |
| 757 | miR-19b(2)     | 1.342497 | 1.201096 | 1.1  | 7.17E-01 | 8.07E-01 |
| 758 | miR-3940(1)    | 0.000108 | 0.000143 | -1.3 | 7.18E-01 | 8.07E-01 |
| 759 | miR-877-3p(1)  | 0.000170 | 0.000214 | -1.2 | 7.19E-01 | 8.07E-01 |
| 760 | miR-92a(2)     | 0.376872 | 0.342477 | 1.1  | 7.21E-01 | 8.08E-01 |
| 761 | miR-887(1)     | 0.019952 | 0.017209 | 1.2  | 7.24E-01 | 8.11E-01 |
| 762 | miR-99b(1)     | 0.206875 | 0.227580 | -1.1 | 7.26E-01 | 8.11E-01 |
| 763 | miR-3605-5p(1  | 0.000271 | 0.000344 | -1.3 | 7.26E-01 | 8.11E-01 |
| 764 | miR-520g-3p(2  | 0.000504 | 0.000633 | -1.2 | 7.31E-01 | 8.16E-01 |
| 765 | miR-106a(1)    | 0.020947 | 0.018926 | 1.1  | 7.34E-01 | 8.17E-01 |
| 766 | miR-181b-2STA  | 0.000414 | 0.000341 | 1.2  | 7.35E-01 | 8.18E-01 |
| 767 | miR-132(1)     | 0.009402 | 0.007960 | 1.2  | 7.46E-01 | 8.29E-01 |
| 768 | miR-185STAR(1  | 0.001005 | 0.000837 | 1.2  | 7.50E-01 | 8.31E-01 |
| 769 | miR-376b(1)    | 0.028716 | 0.033557 | -1.2 | 7.51E-01 | 8.31E-01 |
| 770 | miR-654(1)     | 0.014487 | 0.016450 | -1.1 | 7.51E-01 | 8.31E-01 |
| 771 | miR-1286(1)    | 0.000016 | 0.000032 | -1.4 | 7.54E-01 | 8.34E-01 |
| 772 | miR-1277-3p(1  | 0.004263 | 0.003394 | 1.3  | 7.60E-01 | 8.37E-01 |
| 773 | miR-377(1)     | 0.077576 | 0.097123 | -1.3 | 7.60E-01 | 8.37E-01 |
| 774 | miR-27a(1)     | 1.730665 | 1.595913 | 1.1  | 7.60E-01 | 8.37E-01 |
| 775 | miR-219-1-3p(1 | 0.000144 | 0.000170 | -1.2 | 7.62E-01 | 8.37E-01 |
| 776 | miR-188(1)     | 0.005472 | 0.006137 | -1.1 | 7.70E-01 | 8.46E-01 |
| 777 | miR-1323STAR   | 0.000016 | 0.000007 | 1.4  | 7.81E-01 | 8.57E-01 |
| 778 | miR-98(1)      | 0.129727 | 0.112021 | 1.2  | 7.85E-01 | 8.60E-01 |
| 779 | miR-1185-5p(2  | 0.008795 | 0.009892 | -1.1 | 7.89E-01 | 8.63E-01 |
| 780 | miR-548eSTAR   | 0.000530 | 0.000428 | 1.2  | 7.92E-01 | 8.66E-01 |

|     | A                | B        | C        | D    | E        | F        |
|-----|------------------|----------|----------|------|----------|----------|
| 781 | miR-498(1)       | 0.000040 | 0.000034 | -1.2 | 7.95E-01 | 8.67E-01 |
| 782 | miR-195STAR(1)   | 0.001222 | 0.001450 | -1.2 | 7.96E-01 | 8.67E-01 |
| 783 | miR-520a-3p(1)   | 0.000116 | 0.000131 | 1.2  | 7.96E-01 | 8.67E-01 |
| 784 | miR-618(1)       | 0.000217 | 0.000297 | -1.2 | 7.98E-01 | 8.68E-01 |
| 785 | miR-25(1)        | 0.201566 | 0.216665 | -1.1 | 8.01E-01 | 8.69E-01 |
| 786 | miR-616-3p(1)    | 0.000086 | 0.000066 | 1.2  | 8.11E-01 | 8.79E-01 |
| 787 | miR-30dSTAR(1)   | 0.006613 | 0.006134 | 1.1  | 8.13E-01 | 8.79E-01 |
| 788 | miR-193a-5p(1)   | 0.029969 | 0.032347 | -1.1 | 8.14E-01 | 8.79E-01 |
| 789 | miR-500-5p(2)    | 0.003531 | 0.003151 | 1.1  | 8.15E-01 | 8.79E-01 |
| 790 | miR-495STAR(1)   | 0.000361 | 0.000326 | 1.1  | 8.15E-01 | 8.79E-01 |
| 791 | miR-3912(1)      | 0.000472 | 0.000587 | -1.2 | 8.18E-01 | 8.80E-01 |
| 792 | miR-382-3p(1)    | 0.009076 | 0.010060 | -1.1 | 8.18E-01 | 8.80E-01 |
| 793 | miR-501-5p(1)    | 0.002512 | 0.002306 | 1.1  | 8.23E-01 | 8.84E-01 |
| 794 | miR-26a-1STAR(1) | 0.000607 | 0.000717 | -1.2 | 8.24E-01 | 8.84E-01 |
| 795 | miR-500b-3p(1)   | 0.000153 | 0.000121 | 1.2  | 8.26E-01 | 8.85E-01 |
| 796 | miR-15aSTAR(1)   | 0.000274 | 0.000329 | -1.2 | 8.41E-01 | 9.00E-01 |
| 797 | miR-519b-3p(1)   | 0.000313 | 0.000281 | 1.1  | 8.50E-01 | 9.09E-01 |
| 798 | miR-1229(1)      | 0.000048 | 0.000059 | -1.2 | 8.51E-01 | 9.09E-01 |
| 799 | miR-376a-2-5p(1) | 0.003659 | 0.003961 | -1.1 | 8.54E-01 | 9.11E-01 |
| 800 | miR-1226(1)      | 0.000433 | 0.000397 | 1.1  | 8.57E-01 | 9.13E-01 |
| 801 | miR-1303STAR(1)  | 0.000113 | 0.000099 | 1.2  | 8.59E-01 | 9.14E-01 |
| 802 | miR-382-5p(1)    | 0.020395 | 0.022146 | -1.1 | 8.64E-01 | 9.18E-01 |
| 803 | miR-16-2STAR(1)  | 0.005684 | 0.006071 | -1.1 | 8.77E-01 | 9.31E-01 |
| 804 | miR-501-3p(1)    | 0.007929 | 0.007598 | 1.0  | 8.88E-01 | 9.41E-01 |
| 805 | miR-339-3p(1)    | 0.026538 | 0.025375 | 1.0  | 8.91E-01 | 9.43E-01 |
| 806 | miR-3158(1)      | 0.000723 | 0.000669 | 1.1  | 8.93E-01 | 9.44E-01 |
| 807 | miR-518b-3p(1)   | 0.000840 | 0.000841 | 1.0  | 9.03E-01 | 9.53E-01 |
| 808 | miR-376a-1-5p(1) | 0.006389 | 0.006708 | -1.1 | 9.04E-01 | 9.53E-01 |
| 809 | miR-7-1STAR(1)   | 0.002660 | 0.002774 | -1.0 | 9.07E-01 | 9.55E-01 |
| 810 | miR-450b(1)      | 0.020679 | 0.019722 | 1.0  | 9.11E-01 | 9.58E-01 |



|     | A             | B        | C        | D    | E        | F        |
|-----|---------------|----------|----------|------|----------|----------|
| 811 | miR-101-2STAR | 0.000482 | 0.000439 | 1.1  | 9.30E-01 | 9.77E-01 |
| 812 | miR-103-2STAR | 0.003814 | 0.003591 | 1.1  | 9.32E-01 | 9.78E-01 |
| 813 | miR-1283-2-3p | 0.000117 | 0.000145 | 1.1  | 9.34E-01 | 9.78E-01 |
| 814 | miR-518d-3p(1 | 0.000030 | 0.000019 | 1.1  | 9.36E-01 | 9.79E-01 |
| 815 | miR-206(1)    | 0.000148 | 0.000164 | -1.1 | 9.37E-01 | 9.79E-01 |
| 816 | miR-770(1)    | 0.000105 | 0.000104 | -1.0 | 9.38E-01 | 9.79E-01 |
| 817 | miR-512-3p(2) | 0.000644 | 0.000636 | 1.0  | 9.46E-01 | 9.87E-01 |
| 818 | miR-1237(1)   | 0.000061 | 0.000065 | 1.1  | 9.50E-01 | 9.89E-01 |
| 819 | miR-153-1STAR | 0.000051 | 0.000068 | -1.2 | 9.51E-01 | 9.89E-01 |
| 820 | miR-196b(1)   | 0.088587 | 0.084282 | 1.1  | 9.52E-01 | 9.89E-01 |
| 821 | miR-323bSTAR  | 0.000515 | 0.000648 | -1.2 | 9.54E-01 | 9.91E-01 |
| 822 | miR-103-1STAR | 0.000134 | 0.000134 | 1.0  | 9.60E-01 | 9.94E-01 |
| 823 | miR-518a-1-3p | 0.000264 | 0.000337 | -1.0 | 9.62E-01 | 9.94E-01 |
| 824 | miR-518a-2-3p | 0.000264 | 0.000337 | -1.0 | 9.62E-01 | 9.94E-01 |
| 825 | miR-10bSTAR(1 | 0.017067 | 0.016769 | 1.0  | 9.62E-01 | 9.94E-01 |
| 826 | miR-550-5p(2) | 0.000549 | 0.000554 | 1.0  | 9.66E-01 | 9.96E-01 |
| 827 | miR-487bSTAR  | 0.000083 | 0.000084 | 1.0  | 9.71E-01 | 1.00E+00 |
| 828 | miR-520e-3p(1 | 0.000020 | 0.000015 | -1.0 | 9.73E-01 | 1.00E+00 |
| 829 | miR-636(1)    | 0.000068 | 0.000069 | 1.0  | 9.76E-01 | 1.00E+00 |
| 830 | miR-505(1)    | 0.009464 | 0.009375 | 1.0  | 9.79E-01 | 1.00E+00 |
| 831 | miR-224(1)    | 0.088098 | 0.087400 | 1.0  | 9.82E-01 | 1.00E+00 |
| 832 | miR-29b-2STAR | 0.002717 | 0.002771 | -1.0 | 9.84E-01 | 1.00E+00 |
| 833 | let-7e(1)     | 0.357667 | 0.354065 | 1.0  | 9.84E-01 | 1.00E+00 |
| 834 | miR-369STAR(1 | 0.003510 | 0.003531 | -1.0 | 9.88E-01 | 1.00E+00 |
| 835 | miR-3065-5p(1 | 0.001022 | 0.001021 | 1.0  | 9.90E-01 | 1.00E+00 |
| 836 | miR-191(1)    | 0.502559 | 0.501781 | 1.0  | 9.94E-01 | 1.00E+00 |
| 837 | miR-1298STAR  | 0.000019 | 0.000023 | -1.0 | 9.99E-01 | 1.00E+00 |
| 838 | miR-124STAR(3 | 0.000000 | 0.000000 | 0.0  | 1.00E+00 | 1.00E+00 |
| 839 | miR-1283-1-3p | 0.000000 | 0.000000 | 0.0  | 1.00E+00 | 1.00E+00 |
| 840 | miR-1911STAR  | 0.000000 | 0.000000 | 0.0  | 1.00E+00 | 1.00E+00 |

|     | A               | B        | C        | D   | E        | F        |
|-----|-----------------|----------|----------|-----|----------|----------|
| 841 | miR-219-2-3p(1) | 0.000000 | 0.000000 | 0.0 | 1.00E+00 | 1.00E+00 |
| 842 | miR-302a-3p(1)  | 0.000000 | 0.000000 | 0.0 | 1.00E+00 | 1.00E+00 |
| 843 | miR-302b(1)     | 0.000000 | 0.000000 | 0.0 | 1.00E+00 | 1.00E+00 |
| 844 | miR-302bSTAR    | 0.000000 | 0.000000 | 0.0 | 1.00E+00 | 1.00E+00 |
| 845 | miR-302c(1)     | 0.000000 | 0.000000 | 0.0 | 1.00E+00 | 1.00E+00 |
| 846 | miR-302cSTAR    | 0.000000 | 0.000000 | 0.0 | 1.00E+00 | 1.00E+00 |
| 847 | miR-302dSTAR    | 0.000000 | 0.000000 | 0.0 | 1.00E+00 | 1.00E+00 |
| 848 | miR-367(1)      | 0.000000 | 0.000000 | 0.0 | 1.00E+00 | 1.00E+00 |
| 849 | miR-367STAR(1)  | 0.000000 | 0.000000 | 0.0 | 1.00E+00 | 1.00E+00 |
| 850 | miR-448(1)      | 0.000000 | 0.000000 | 0.0 | 1.00E+00 | 1.00E+00 |
| 851 | miR-521-2STAR   | 0.000000 | 0.000000 | 0.0 | 1.00E+00 | 1.00E+00 |
| 852 | miR-92a-2STAR   | 0.000000 | 0.000000 | 0.0 | 1.00E+00 | 1.00E+00 |

|    | A                | B                      | C        | D           | E        | F        |
|----|------------------|------------------------|----------|-------------|----------|----------|
| 1  |                  | Relative frequency (%) |          |             |          |          |
| 2  | miRNA            | HemSC                  | NS       | Fold change | P Value  | FDR      |
| 3  | miR-31-5p(1)     | 0.453689               | 0.000859 | 550.8       | 3.05E-10 | 3.55E-08 |
| 4  | miR-302b(1)      | 0.002404               | 0.000000 | 479.9       | 2.64E-08 | 1.07E-06 |
| 5  | miR-100STAR(1)   | 0.114057               | 0.000374 | 294.4       | 9.34E-06 | 1.10E-04 |
| 6  | miR-137STAR(1)   | 0.001438               | 0.000000 | 287.7       | 8.92E-07 | 1.72E-05 |
| 7  | miR-302a-3p(1)   | 0.001256               | 0.000000 | 251.0       | 3.30E-10 | 3.55E-08 |
| 8  | miR-31-3p(1)     | 0.092611               | 0.000409 | 246.6       | 1.36E-07 | 3.61E-06 |
| 9  | miR-889(1)       | 0.290536               | 0.001314 | 218.9       | 1.51E-07 | 3.90E-06 |
| 10 | miR-1185-2-3p(1) | 0.045083               | 0.000206 | 210.3       | 1.66E-08 | 8.27E-07 |
| 11 | miR-302a-5p(1)   | 0.000915               | 0.000000 | 183.3       | 2.50E-09 | 1.77E-07 |
| 12 | miR-137(1)       | 0.205673               | 0.001637 | 125.1       | 3.42E-06 | 5.01E-05 |
| 13 | miR-1185-1-3p(1) | 0.164970               | 0.001464 | 110.1       | 9.04E-06 | 1.08E-04 |
| 14 | miR-154-3p(1)    | 0.433777               | 0.004008 | 107.7       | 3.47E-10 | 3.55E-08 |
| 15 | miR-29b-1STAR(1) | 0.023372               | 0.000228 | 106.8       | 3.84E-06 | 5.44E-05 |
| 16 | miR-302d(1)      | 0.001036               | 0.000005 | 102.8       | 3.98E-07 | 9.13E-06 |
| 17 | miR-3117(1)      | 0.010784               | 0.000101 | 99.4        | 9.88E-06 | 1.14E-04 |
| 18 | miR-222STAR(1)   | 0.171113               | 0.001989 | 86.3        | 1.31E-05 | 1.33E-04 |
| 19 | miR-380-3p(1)    | 0.039505               | 0.000465 | 80.0        | 4.30E-07 | 9.62E-06 |
| 20 | miR-496STAR(1)   | 0.001100               | 0.000007 | 79.9        | 1.05E-05 | 1.16E-04 |
| 21 | miR-302c(1)      | 0.000372               | 0.000000 | 75.4        | 2.24E-06 | 3.81E-05 |
| 22 | miR-1197(1)      | 0.011006               | 0.000141 | 73.5        | 1.28E-08 | 6.83E-07 |
| 23 | miR-758STAR(1)   | 0.014417               | 0.000215 | 68.1        | 2.22E-08 | 9.95E-07 |
| 24 | miR-539(1)       | 0.378597               | 0.005899 | 64.2        | 1.06E-07 | 2.90E-06 |
| 25 | miR-487a-3p(1)   | 0.159057               | 0.002475 | 63.7        | 1.75E-08 | 8.27E-07 |
| 26 | miR-3152(1)      | 0.001895               | 0.000021 | 62.5        | 3.07E-06 | 4.71E-05 |
| 27 | miR-34aSTAR(1)   | 0.033653               | 0.000551 | 61.6        | 1.53E-06 | 2.71E-05 |
| 28 | miR-412STAR(1)   | 0.001457               | 0.000017 | 60.3        | 1.31E-06 | 2.39E-05 |
| 29 | miR-380-5p(1)    | 0.029756               | 0.000486 | 58.6        | 8.84E-08 | 2.59E-06 |
| 30 | miR-3919-3p(1)   | 0.000789               | 0.000007 | 57.6        | 6.81E-05 | 4.99E-04 |

|    | A              | B         | C        | D    | E        | F        |
|----|----------------|-----------|----------|------|----------|----------|
| 31 | miR-376a-3p(2) | 0.607400  | 0.011717 | 51.7 | 1.01E-06 | 1.91E-05 |
| 32 | miR-323aSTAR(  | 0.001451  | 0.000021 | 50.5 | 1.72E-05 | 1.60E-04 |
| 33 | miR-889STAR(1  | 0.002441  | 0.000040 | 50.4 | 1.25E-05 | 1.29E-04 |
| 34 | miR-3176(1)    | 0.002743  | 0.000070 | 47.6 | 4.02E-08 | 1.42E-06 |
| 35 | miR-411STAR(1  | 0.072974  | 0.001595 | 45.1 | 1.10E-04 | 7.33E-04 |
| 36 | miR-431-5p(1)  | 0.140069  | 0.003195 | 43.5 | 3.76E-10 | 3.55E-08 |
| 37 | miR-155STAR(1  | 0.001768  | 0.000033 | 43.2 | 8.77E-06 | 1.07E-04 |
| 38 | miR-412(1)     | 0.055417  | 0.001327 | 41.0 | 1.34E-05 | 1.33E-04 |
| 39 | miR-655STAR(1  | 0.001445  | 0.000028 | 39.4 | 2.60E-05 | 2.33E-04 |
| 40 | miR-494(1)     | 0.688852  | 0.018462 | 37.3 | 7.65E-05 | 5.37E-04 |
| 41 | miR-221STAR(1  | 0.567270  | 0.015258 | 37.1 | 3.30E-09 | 2.16E-07 |
| 42 | miR-496(1)     | 0.026015  | 0.000675 | 36.9 | 8.81E-07 | 1.72E-05 |
| 43 | miR-155(1)     | 0.295110  | 0.008889 | 33.1 | 2.85E-10 | 3.55E-08 |
| 44 | miR-433STAR(1  | 0.009703  | 0.000288 | 32.2 | 1.02E-05 | 1.16E-04 |
| 45 | miR-3152STAR(  | 0.000331  | 0.000006 | 32.2 | 2.53E-04 | 1.38E-03 |
| 46 | miR-34a(1)     | 1.487413  | 0.050530 | 29.4 | 6.82E-11 | 1.93E-08 |
| 47 | miR-4725-3p(1) | 0.000391  | 0.000006 | 29.2 | 3.44E-04 | 1.76E-03 |
| 48 | miR-1910(1)    | 0.000297  | 0.000005 | 29.0 | 1.34E-02 | 3.90E-02 |
| 49 | miR-323a(1)    | 0.072743  | 0.002540 | 28.6 | 1.27E-04 | 8.13E-04 |
| 50 | miR-543STAR(1  | 0.011713  | 0.000405 | 27.7 | 5.20E-06 | 6.80E-05 |
| 51 | miR-1193-5p(1) | 0.000126  | 0.000000 | 26.0 | 8.82E-04 | 3.71E-03 |
| 52 | miR-379STAR(1  | 0.023895  | 0.000902 | 25.9 | 1.15E-05 | 1.24E-04 |
| 53 | miR-29aSTAR(1  | 0.048454  | 0.002069 | 23.6 | 1.82E-04 | 1.04E-03 |
| 54 | miR-134(1)     | 0.530584  | 0.022972 | 23.1 | 3.48E-08 | 1.32E-06 |
| 55 | miR-409-3p(1)  | 0.874438  | 0.039162 | 22.3 | 6.92E-04 | 3.11E-03 |
| 56 | miR-125b-1STA  | 0.376249  | 0.017534 | 21.4 | 5.00E-08 | 1.70E-06 |
| 57 | miR-1252(1)    | 0.000753  | 0.000028 | 21.4 | 2.04E-04 | 1.14E-03 |
| 58 | miR-410(1)     | 0.099733  | 0.004641 | 21.3 | 2.13E-05 | 1.96E-04 |
| 59 | miR-21(1)      | 79.918677 | 3.906535 | 20.5 | 8.58E-10 | 7.29E-08 |
| 60 | miR-29b(2)     | 2.038462  | 0.106145 | 19.2 | 7.89E-08 | 2.50E-06 |

|    | A                | B        | C        | D    | E        | F        |
|----|------------------|----------|----------|------|----------|----------|
| 61 | miR-541-5p(1)    | 0.000417 | 0.000014 | 18.9 | 1.33E-04 | 8.45E-04 |
| 62 | miR-7(3)         | 0.543473 | 0.028887 | 18.8 | 4.23E-09 | 2.57E-07 |
| 63 | miR-323b(1)      | 0.011746 | 0.000613 | 18.7 | 3.63E-05 | 2.89E-04 |
| 64 | miR-539STAR(1)   | 0.020272 | 0.001086 | 18.3 | 1.32E-06 | 2.39E-05 |
| 65 | miR-138(2)       | 0.115730 | 0.006309 | 18.3 | 2.37E-08 | 1.01E-06 |
| 66 | miR-544-5p(1)    | 0.009613 | 0.000534 | 17.8 | 1.17E-04 | 7.74E-04 |
| 67 | miR-367(1)       | 0.000085 | 0.000000 | 17.7 | 2.74E-03 | 9.72E-03 |
| 68 | miR-543(1)       | 0.075000 | 0.004375 | 17.1 | 8.62E-06 | 1.06E-04 |
| 69 | miR-122(1)       | 0.002573 | 0.000138 | 16.8 | 1.48E-04 | 9.18E-04 |
| 70 | miR-376b(1)      | 0.550593 | 0.033557 | 16.4 | 6.09E-05 | 4.50E-04 |
| 71 | miR-299-3p(1)    | 0.095340 | 0.005897 | 16.1 | 1.08E-03 | 4.37E-03 |
| 72 | miR-493-5p(1)    | 0.222518 | 0.014231 | 15.6 | 5.29E-05 | 4.01E-04 |
| 73 | miR-369STAR(1)   | 0.053650 | 0.003531 | 15.1 | 9.27E-05 | 6.35E-04 |
| 74 | miR-485-3p(1)    | 0.017610 | 0.001218 | 14.4 | 6.04E-06 | 7.77E-05 |
| 75 | miR-379(1)       | 0.633473 | 0.044907 | 14.1 | 1.59E-05 | 1.50E-04 |
| 76 | miR-487bSTAR(1)  | 0.001225 | 0.000084 | 14.0 | 6.63E-04 | 3.00E-03 |
| 77 | miR-3174(1)      | 0.000377 | 0.000023 | 13.7 | 6.94E-03 | 2.20E-02 |
| 78 | miR-1276(1)      | 0.000121 | 0.000003 | 13.6 | 1.14E-02 | 3.42E-02 |
| 79 | miR-329STAR(2)   | 0.001950 | 0.000139 | 13.5 | 9.13E-05 | 6.31E-04 |
| 80 | miR-411(1)       | 0.443029 | 0.032912 | 13.4 | 4.99E-04 | 2.40E-03 |
| 81 | miR-498STAR(1)   | 0.000121 | 0.000003 | 13.4 | 2.26E-02 | 5.96E-02 |
| 82 | miR-370STAR(1)   | 0.008549 | 0.000643 | 13.1 | 8.10E-06 | 1.01E-04 |
| 83 | miR-758(1)       | 0.038659 | 0.002915 | 13.1 | 3.32E-06 | 4.95E-05 |
| 84 | miR-656STAR(1)   | 0.001497 | 0.000104 | 12.9 | 7.80E-04 | 3.38E-03 |
| 85 | miR-493-3p(1)    | 0.117599 | 0.009495 | 12.4 | 3.71E-05 | 2.92E-04 |
| 86 | miR-1185-5p(2)   | 0.122324 | 0.009892 | 12.3 | 5.63E-05 | 4.24E-04 |
| 87 | miR-376a-2-5p(1) | 0.048507 | 0.003961 | 12.2 | 8.69E-05 | 6.05E-04 |
| 88 | miR-494STAR(1)   | 0.001035 | 0.000079 | 11.7 | 1.53E-03 | 5.95E-03 |
| 89 | miR-541-3p(1)    | 0.000663 | 0.000046 | 11.5 | 7.62E-04 | 3.32E-03 |
| 90 | miR-138-1STAR(1) | 0.001528 | 0.000135 | 11.5 | 1.12E-03 | 4.53E-03 |

|     | A              | B        | C        | D    | E        | F        |
|-----|----------------|----------|----------|------|----------|----------|
| 91  | miR-655(1)     | 0.131189 | 0.011449 | 11.4 | 1.48E-03 | 5.77E-03 |
| 92  | miR-421(1)     | 0.029878 | 0.002637 | 11.4 | 3.71E-06 | 5.34E-05 |
| 93  | miR-3619-5p(1) | 0.000502 | 0.000045 | 11.3 | 9.69E-04 | 3.98E-03 |
| 94  | miR-376cSTAR(  | 0.042142 | 0.003720 | 11.3 | 1.10E-05 | 1.20E-04 |
| 95  | miR-3944-3p(1) | 0.000206 | 0.000012 | 11.1 | 1.82E-02 | 5.03E-02 |
| 96  | miR-1294STAR(  | 0.000367 | 0.000028 | 10.7 | 5.10E-03 | 1.70E-02 |
| 97  | miR-377STAR(1  | 0.053513 | 0.005113 | 10.4 | 1.02E-04 | 6.81E-04 |
| 98  | miR-329(2)     | 0.052491 | 0.005049 | 10.4 | 1.45E-05 | 1.40E-04 |
| 99  | miR-656(1)     | 0.041647 | 0.004080 | 10.1 | 1.24E-04 | 8.07E-04 |
| 100 | miR-519b-3p(1) | 0.002724 | 0.000281 | 9.8  | 9.82E-05 | 6.62E-04 |
| 101 | miR-381(1)     | 0.502921 | 0.052020 | 9.7  | 7.84E-03 | 2.46E-02 |
| 102 | miR-374bSTAR(  | 0.011440 | 0.001234 | 9.5  | 2.72E-04 | 1.46E-03 |
| 103 | miR-222(1)     | 4.374944 | 0.460232 | 9.5  | 1.59E-09 | 1.23E-07 |
| 104 | miR-21STAR(1)  | 0.075366 | 0.007978 | 9.4  | 3.35E-05 | 2.82E-04 |
| 105 | miR-302bSTAR(  | 0.000040 | 0.000000 | 9.3  | 3.39E-02 | 7.87E-02 |
| 106 | miR-521-1STAR  | 0.000171 | 0.000012 | 9.1  | 4.35E-02 | 9.59E-02 |
| 107 | miR-34c(1)     | 0.063606 | 0.007019 | 9.1  | 3.49E-04 | 1.77E-03 |
| 108 | miR-519e-5p(1) | 0.001013 | 0.000103 | 9.0  | 2.18E-02 | 5.82E-02 |
| 109 | miR-369(1)     | 0.341347 | 0.038361 | 8.9  | 2.82E-05 | 2.50E-04 |
| 110 | miR-654STAR(1  | 0.051028 | 0.005910 | 8.6  | 4.51E-06 | 6.08E-05 |
| 111 | miR-2355-5p(1) | 0.002753 | 0.000302 | 8.6  | 6.93E-03 | 2.20E-02 |
| 112 | miR-5094-5p(1) | 0.000085 | 0.000006 | 8.5  | 1.40E-01 | 2.41E-01 |
| 113 | miR-3192(1)    | 0.000085 | 0.000006 | 8.5  | 8.19E-02 | 1.57E-01 |
| 114 | miR-520e-3p(1) | 0.000161 | 0.000015 | 8.2  | 2.84E-02 | 6.88E-02 |
| 115 | miR-544-3p(1)  | 0.003020 | 0.000345 | 8.2  | 6.86E-03 | 2.19E-02 |
| 116 | miR-376a-1-5p( | 0.053844 | 0.006708 | 8.0  | 1.46E-04 | 9.10E-04 |
| 117 | miR-1303(1)    | 0.001437 | 0.000172 | 7.9  | 1.08E-03 | 4.37E-03 |
| 118 | miR-409-5p(1)  | 0.065436 | 0.008299 | 7.9  | 1.77E-04 | 1.03E-03 |
| 119 | miR-1294(1)    | 0.001083 | 0.000134 | 7.7  | 1.30E-03 | 5.13E-03 |
| 120 | miR-3909(1)    | 0.001561 | 0.000212 | 7.6  | 2.44E-02 | 6.19E-02 |

|     | A               | B        | C        | D   | E        | F        |
|-----|-----------------|----------|----------|-----|----------|----------|
| 121 | miR-376bSTAR(   | 0.026371 | 0.003442 | 7.6 | 1.58E-04 | 9.76E-04 |
| 122 | let-7a-2STAR(1) | 0.001618 | 0.000220 | 7.4 | 7.96E-04 | 3.43E-03 |
| 123 | miR-382-5p(1)   | 0.154169 | 0.022146 | 7.0 | 1.75E-03 | 6.53E-03 |
| 124 | miR-432(1)      | 0.052320 | 0.007788 | 6.7 | 1.64E-04 | 9.93E-04 |
| 125 | miR-410STAR(1)  | 0.000296 | 0.000035 | 6.5 | 4.56E-02 | 9.99E-02 |
| 126 | miR-665(1)      | 0.076803 | 0.011994 | 6.4 | 1.20E-02 | 3.58E-02 |
| 127 | miR-520d-5p(1)  | 0.003737 | 0.000638 | 6.4 | 5.81E-03 | 1.92E-02 |
| 128 | miR-449c(1)     | 0.000080 | 0.000007 | 6.3 | 4.82E-02 | 1.04E-01 |
| 129 | miR-654(1)      | 0.102731 | 0.016450 | 6.2 | 4.98E-04 | 2.40E-03 |
| 130 | miR-29a(1)      | 4.646449 | 0.747467 | 6.2 | 4.89E-03 | 1.64E-02 |
| 131 | miR-519dSTAR(   | 0.000090 | 0.000008 | 6.1 | 8.70E-02 | 1.64E-01 |
| 132 | miR-1323STAR(   | 0.000081 | 0.000007 | 6.1 | 1.35E-01 | 2.35E-01 |
| 133 | miR-3677-5p(1)  | 0.000256 | 0.000034 | 6.1 | 6.71E-02 | 1.35E-01 |
| 134 | miR-487a-5p(1)  | 0.006388 | 0.001042 | 6.0 | 1.27E-02 | 3.75E-02 |
| 135 | miR-431-3p(1)   | 0.006626 | 0.001099 | 5.9 | 5.41E-04 | 2.57E-03 |
| 136 | miR-299-5p(1)   | 0.141545 | 0.024095 | 5.9 | 2.33E-03 | 8.44E-03 |
| 137 | miR-1278(1)     | 0.000211 | 0.000028 | 5.8 | 9.39E-02 | 1.74E-01 |
| 138 | miR-18a(1)      | 0.249375 | 0.043217 | 5.8 | 9.78E-04 | 4.00E-03 |
| 139 | miR-365-2STAR   | 0.001040 | 0.000187 | 5.7 | 5.53E-02 | 1.16E-01 |
| 140 | miR-503(1)      | 0.119524 | 0.021247 | 5.6 | 2.97E-04 | 1.56E-03 |
| 141 | miR-1304STAR(   | 0.001338 | 0.000241 | 5.6 | 1.61E-04 | 9.87E-04 |
| 142 | miR-491STAR(1)  | 0.000502 | 0.000078 | 5.6 | 2.69E-02 | 6.60E-02 |
| 143 | miR-449a(1)     | 0.001387 | 0.000257 | 5.6 | 1.45E-02 | 4.16E-02 |
| 144 | miR-520f-3p(1)  | 0.000811 | 0.000158 | 5.5 | 6.03E-03 | 1.97E-02 |
| 145 | miR-1255a-3p(1) | 0.000327 | 0.000063 | 5.3 | 1.82E-02 | 5.03E-02 |
| 146 | miR-3677-3p(1)  | 0.000161 | 0.000035 | 5.3 | 6.11E-02 | 1.26E-01 |
| 147 | miR-340(1)      | 0.015740 | 0.002997 | 5.2 | 6.82E-02 | 1.37E-01 |
| 148 | miR-520a-3p(1)  | 0.000538 | 0.000131 | 5.2 | 8.79E-03 | 2.72E-02 |
| 149 | miR-548e(1)     | 0.006496 | 0.001281 | 5.1 | 3.49E-04 | 1.77E-03 |
| 150 | miR-3158STAR(   | 0.000376 | 0.000072 | 5.1 | 1.09E-01 | 1.98E-01 |

|     | A              | B        | C        | D   | E        | F        |
|-----|----------------|----------|----------|-----|----------|----------|
| 151 | miR-495(1)     | 0.142437 | 0.027856 | 5.1 | 1.65E-03 | 6.24E-03 |
| 152 | miR-33bSTAR(1) | 0.001508 | 0.000303 | 5.1 | 2.60E-02 | 6.46E-02 |
| 153 | miR-34bSTAR(1) | 0.000628 | 0.000138 | 5.1 | 8.95E-02 | 1.67E-01 |
| 154 | miR-487b(1)    | 0.142496 | 0.028308 | 5.0 | 1.60E-03 | 6.10E-03 |
| 155 | miR-526b-5p(1) | 0.001024 | 0.000218 | 4.9 | 8.14E-03 | 2.54E-02 |
| 156 | miR-942STAR(1) | 0.000381 | 0.000095 | 4.8 | 9.73E-02 | 1.79E-01 |
| 157 | miR-345STAR(1) | 0.000493 | 0.000094 | 4.8 | 8.74E-02 | 1.64E-01 |
| 158 | miR-519c-3p(1) | 0.000367 | 0.000087 | 4.8 | 2.50E-02 | 6.26E-02 |
| 159 | miR-3158(1)    | 0.003175 | 0.000669 | 4.8 | 4.58E-02 | 1.00E-01 |
| 160 | miR-495STAR(1) | 0.001557 | 0.000326 | 4.7 | 1.46E-02 | 4.18E-02 |
| 161 | miR-92b(1)     | 0.029859 | 0.006344 | 4.7 | 4.69E-04 | 2.30E-03 |
| 162 | miR-381STAR(1) | 0.004850 | 0.001014 | 4.7 | 3.63E-02 | 8.28E-02 |
| 163 | miR-579-5p(1)  | 0.000583 | 0.000127 | 4.7 | 7.96E-02 | 1.53E-01 |
| 164 | miR-628-5p(1)  | 0.006276 | 0.001369 | 4.6 | 1.41E-02 | 4.07E-02 |
| 165 | miR-452(1)     | 0.386149 | 0.083638 | 4.6 | 1.25E-05 | 1.29E-04 |
| 166 | miR-92bSTAR(1) | 0.002987 | 0.000639 | 4.6 | 4.95E-04 | 2.40E-03 |
| 167 | miR-516STAR(4) | 0.000247 | 0.000057 | 4.5 | 4.17E-02 | 9.26E-02 |
| 168 | miR-525-5p(1)  | 0.000533 | 0.000116 | 4.5 | 2.14E-02 | 5.75E-02 |
| 169 | miR-3200(1)    | 0.003160 | 0.000689 | 4.5 | 1.73E-03 | 6.48E-03 |
| 170 | miR-3934(1)    | 0.001903 | 0.000439 | 4.4 | 1.28E-02 | 3.77E-02 |
| 171 | miR-376c(1)    | 1.763356 | 0.403952 | 4.4 | 2.65E-02 | 6.58E-02 |
| 172 | miR-590-3p(1)  | 0.027558 | 0.006382 | 4.3 | 1.90E-03 | 7.02E-03 |
| 173 | miR-671-5p(1)  | 0.060279 | 0.014035 | 4.3 | 2.22E-02 | 5.87E-02 |
| 174 | miR-221(1)     | 4.780389 | 1.118186 | 4.3 | 5.24E-05 | 4.01E-04 |
| 175 | miR-616-5p(1)  | 0.000815 | 0.000179 | 4.2 | 1.13E-01 | 2.03E-01 |
| 176 | miR-4746(1)    | 0.000256 | 0.000051 | 4.2 | 8.27E-02 | 1.58E-01 |
| 177 | miR-641-5p(1)  | 0.001898 | 0.000446 | 4.2 | 3.41E-02 | 7.91E-02 |
| 178 | miR-515(2)     | 0.006650 | 0.001635 | 4.2 | 3.25E-02 | 7.64E-02 |
| 179 | miR-25STAR(1)  | 0.001802 | 0.000434 | 4.1 | 9.62E-02 | 1.77E-01 |
| 180 | miR-425(1)     | 0.417197 | 0.101433 | 4.1 | 9.56E-05 | 6.50E-04 |



|     | A              | B        | C        | D   | E        | F        |
|-----|----------------|----------|----------|-----|----------|----------|
| 181 | miR-130bSTAR(  | 0.010394 | 0.002519 | 4.1 | 3.15E-04 | 1.64E-03 |
| 183 | miR-518e-5p(5) | 0.000787 | 0.000206 | 4.0 | 5.58E-02 | 1.17E-01 |
| 184 | miR-485-5p(1)  | 0.020811 | 0.005173 | 4.0 | 5.99E-02 | 1.24E-01 |
| 185 | miR-370(1)     | 0.042155 | 0.010611 | 4.0 | 1.41E-02 | 4.07E-02 |
| 186 | miR-589-3p(1)  | 0.001317 | 0.000350 | 3.9 | 1.55E-03 | 5.97E-03 |
| 187 | miR-20a(1)     | 0.554508 | 0.141330 | 3.9 | 3.50E-03 | 1.21E-02 |
| 188 | miR-337(1)     | 0.070581 | 0.018210 | 3.9 | 1.63E-02 | 4.58E-02 |
| 189 | miR-1283-5p(2) | 0.000744 | 0.000257 | 3.9 | 7.42E-02 | 1.44E-01 |
| 190 | miR-605-5p(1)  | 0.000126 | 0.000026 | 3.8 | 6.59E-02 | 1.33E-01 |
| 191 | miR-518e-3p(1) | 0.003212 | 0.000881 | 3.8 | 3.52E-02 | 8.09E-02 |
| 192 | miR-584STAR(1  | 0.000246 | 0.000063 | 3.8 | 7.99E-02 | 1.53E-01 |
| 193 | miR-129-5p(2)  | 0.002084 | 0.000526 | 3.8 | 8.88E-03 | 2.73E-02 |
| 194 | miR-15b(1)     | 0.316261 | 0.083943 | 3.8 | 2.85E-03 | 1.01E-02 |
| 195 | miR-519a-2-5p( | 0.000377 | 0.000121 | 3.7 | 1.29E-01 | 2.26E-01 |
| 196 | miR-27aSTAR(1  | 0.105152 | 0.028133 | 3.7 | 1.32E-02 | 3.85E-02 |
| 197 | miR-518d-5p(5) | 0.000581 | 0.000157 | 3.7 | 1.10E-01 | 2.00E-01 |
| 198 | miR-3657(1)    | 0.000216 | 0.000047 | 3.7 | 9.84E-02 | 1.80E-01 |
| 199 | miR-770(1)     | 0.000422 | 0.000104 | 3.7 | 7.21E-02 | 1.42E-01 |
| 200 | miR-16(2)      | 1.757755 | 0.485645 | 3.6 | 2.74E-02 | 6.66E-02 |
| 202 | miR-15bSTAR(1  | 0.017388 | 0.004853 | 3.6 | 1.22E-02 | 3.62E-02 |
| 204 | miR-1305(1)    | 0.000246 | 0.000062 | 3.6 | 3.67E-02 | 8.32E-02 |
| 205 | miR-22STAR(1)  | 0.033814 | 0.009502 | 3.6 | 5.53E-02 | 1.16E-01 |
| 206 | miR-134STAR(1  | 0.001071 | 0.000291 | 3.5 | 5.19E-02 | 1.10E-01 |
| 207 | miR-665STAR(1  | 0.000452 | 0.000117 | 3.5 | 7.21E-02 | 1.42E-01 |
| 209 | miR-432STAR(1  | 0.000687 | 0.000187 | 3.5 | 8.75E-02 | 1.64E-01 |
| 211 | miR-34cSTAR(1  | 0.000618 | 0.000173 | 3.5 | 1.40E-01 | 2.41E-01 |
| 212 | miR-522-3p(1)  | 0.000477 | 0.000180 | 3.4 | 2.87E-02 | 6.94E-02 |
| 213 | miR-224(1)     | 0.295046 | 0.087400 | 3.4 | 4.29E-03 | 1.46E-02 |
| 215 | miR-518a-5p(3) | 0.006226 | 0.001947 | 3.3 | 1.02E-01 | 1.86E-01 |
| 217 | miR-452STAR(1  | 0.045219 | 0.013916 | 3.2 | 6.10E-03 | 1.99E-02 |

|     | A                | B        | C        | D   | E        | F        |
|-----|------------------|----------|----------|-----|----------|----------|
| 218 | miR-516a(2)      | 0.012441 | 0.003878 | 3.2 | 4.88E-02 | 1.05E-01 |
| 219 | miR-671-3p(1)    | 0.002647 | 0.000814 | 3.2 | 5.01E-02 | 1.07E-01 |
| 222 | miR-1277-5p(1)   | 0.003458 | 0.001050 | 3.2 | 1.35E-01 | 2.35E-01 |
| 223 | miR-19aSTAR(1)   | 0.000337 | 0.000091 | 3.2 | 7.64E-02 | 1.48E-01 |
| 225 | miR-382-3p(1)    | 0.032071 | 0.010060 | 3.2 | 3.08E-02 | 7.34E-02 |
| 226 | miR-374a(1)      | 0.288605 | 0.092976 | 3.1 | 3.61E-02 | 8.24E-02 |
| 228 | miR-3187(1)      | 0.000337 | 0.000098 | 3.1 | 6.85E-02 | 1.37E-01 |
| 229 | miR-589-5p(1)    | 0.001261 | 0.000413 | 3.1 | 2.16E-02 | 5.79E-02 |
| 230 | miR-147STAR(1)   | 0.000216 | 0.000069 | 3.0 | 1.17E-01 | 2.08E-01 |
| 231 | let-7i(1)        | 5.724508 | 1.893000 | 3.0 | 1.29E-02 | 3.77E-02 |
| 232 | miR-148bSTAR(1)  | 0.006362 | 0.002163 | 3.0 | 1.63E-02 | 4.58E-02 |
| 234 | miR-491(1)       | 0.006194 | 0.002142 | 2.9 | 6.05E-02 | 1.25E-01 |
| 237 | miR-519a-1-5p(1) | 0.000256 | 0.000099 | 2.8 | 1.17E-01 | 2.08E-01 |
| 238 | miR-500b-3p(1)   | 0.000367 | 0.000121 | 2.8 | 1.20E-01 | 2.13E-01 |
| 242 | miR-212-3p(1)    | 0.002623 | 0.000972 | 2.7 | 3.15E-02 | 7.47E-02 |
| 243 | miR-518c-3p(1)   | 0.003324 | 0.001287 | 2.7 | 4.65E-02 | 1.01E-01 |
| 244 | miR-132STAR(1)   | 0.005646 | 0.002129 | 2.7 | 3.77E-02 | 8.51E-02 |
| 247 | miR-24-2STAR(1)  | 0.102461 | 0.039122 | 2.6 | 6.22E-02 | 1.28E-01 |
| 248 | miR-1255a-5p(1)  | 0.001025 | 0.000419 | 2.5 | 1.13E-01 | 2.03E-01 |
| 249 | miR-18aSTAR(1)   | 0.003042 | 0.001185 | 2.5 | 2.37E-02 | 6.13E-02 |
| 250 | miR-10aSTAR(1)   | 0.005352 | 0.002125 | 2.5 | 8.48E-02 | 1.61E-01 |
| 252 | miR-130b(1)      | 0.092099 | 0.036762 | 2.5 | 1.54E-02 | 4.38E-02 |
| 254 | miR-520b-3p(2)   | 0.000564 | 0.000257 | 2.5 | 1.03E-01 | 1.87E-01 |
| 258 | miR-193a-5p(1)   | 0.079095 | 0.032347 | 2.4 | 1.94E-02 | 5.29E-02 |
| 259 | miR-615STAR(1)   | 0.001497 | 0.000613 | 2.4 | 7.39E-02 | 1.44E-01 |
| 260 | miR-374aSTAR(1)  | 0.035035 | 0.014636 | 2.4 | 4.26E-02 | 9.42E-02 |
| 263 | miR-296-3p(1)    | 0.002539 | 0.001093 | 2.3 | 7.59E-02 | 1.47E-01 |
| 267 | miR-301b(1)      | 0.007587 | 0.003387 | 2.2 | 6.10E-02 | 1.26E-01 |
| 268 | miR-512-3p(2)    | 0.001367 | 0.000636 | 2.2 | 6.31E-02 | 1.28E-01 |
| 271 | miR-361-5p(1)    | 0.094739 | 0.042867 | 2.2 | 9.09E-02 | 1.69E-01 |

|     | A               | B        | C        | D    | E        | F        |
|-----|-----------------|----------|----------|------|----------|----------|
| 283 | miR-519d(1)     | 0.001045 | 0.000522 | 2.1  | 7.15E-02 | 1.42E-01 |
| 284 | miR-1270(2)     | 0.001285 | 0.000617 | 2.1  | 1.07E-01 | 1.94E-01 |
| 287 | miR-19b-1STAR   | 0.006613 | 0.003227 | 2.0  | 7.34E-02 | 1.44E-01 |
| 291 | miR-128(2)      | 0.046067 | 0.023197 | 2.0  | 7.38E-02 | 1.44E-01 |
| 297 | miR-339-5p(1)   | 0.015936 | 0.008251 | 1.9  | 7.41E-02 | 1.44E-01 |
| 307 | miR-331STAR(1)  | 0.004502 | 0.002426 | 1.9  | 1.43E-01 | 2.45E-01 |
| 308 | miR-454(1)      | 0.015442 | 0.008294 | 1.9  | 1.39E-01 | 2.39E-01 |
| 313 | miR-151-5p(1)   | 0.341284 | 0.193463 | 1.8  | 9.46E-02 | 1.75E-01 |
| 314 | miR-151-3p(1)   | 0.376256 | 0.216476 | 1.7  | 3.52E-02 | 8.09E-02 |
| 316 | miR-335-3p(1)   | 0.013316 | 0.007702 | 1.7  | 1.17E-01 | 2.08E-01 |
| 321 | miR-27a(1)      | 2.665408 | 1.595913 | 1.7  | 9.67E-02 | 1.78E-01 |
| 509 | miR-125b(2)     | 0.878408 | 1.442813 | -1.6 | 1.25E-01 | 2.18E-01 |
| 513 | miR-345(1)      | 0.009618 | 0.016249 | -1.7 | 1.07E-01 | 1.94E-01 |
| 526 | miR-218(2)      | 0.061474 | 0.112763 | -1.8 | 1.19E-01 | 2.11E-01 |
| 528 | miR-532-5p(1)   | 0.027323 | 0.050390 | -1.8 | 8.96E-02 | 1.67E-01 |
| 539 | miR-193bSTAR(1) | 0.003542 | 0.006890 | -1.9 | 9.37E-02 | 1.74E-01 |
| 541 | miR-30eSTAR(1)  | 0.101498 | 0.199059 | -2.0 | 2.43E-02 | 6.19E-02 |
| 544 | miR-660(1)      | 0.019470 | 0.038638 | -2.0 | 1.26E-01 | 2.21E-01 |
| 545 | miR-27b(1)      | 1.098930 | 2.181145 | -2.0 | 2.44E-02 | 6.19E-02 |
| 546 | miR-140(1)      | 0.165302 | 0.330303 | -2.0 | 1.16E-01 | 2.08E-01 |
| 553 | miR-502(1)      | 0.009956 | 0.021575 | -2.2 | 4.12E-02 | 9.19E-02 |
| 555 | miR-362-5p(1)   | 0.012294 | 0.026941 | -2.2 | 6.99E-02 | 1.39E-01 |
| 557 | miR-197(1)      | 0.012032 | 0.026610 | -2.2 | 3.87E-02 | 8.70E-02 |
| 558 | miR-93STAR(1)   | 0.002673 | 0.005906 | -2.2 | 6.83E-02 | 1.37E-01 |
| 559 | miR-25(1)       | 0.097535 | 0.216665 | -2.2 | 2.69E-02 | 6.60E-02 |
| 560 | miR-342(1)      | 0.037573 | 0.084378 | -2.2 | 8.69E-03 | 2.71E-02 |
| 562 | miR-30d(1)      | 0.233275 | 0.526805 | -2.3 | 2.26E-02 | 5.96E-02 |
| 564 | miR-181d(1)     | 0.004351 | 0.010029 | -2.3 | 1.95E-02 | 5.31E-02 |
| 566 | let-7dSTAR(1)   | 0.007546 | 0.017735 | -2.4 | 3.58E-02 | 8.19E-02 |
| 569 | miR-505(1)      | 0.003928 | 0.009375 | -2.4 | 4.90E-02 | 1.05E-01 |

|     | A               | B        | C         | D    | E        | F        |
|-----|-----------------|----------|-----------|------|----------|----------|
| 575 | miR-143(1)      | 4.249267 | 10.807826 | -2.5 | 7.35E-02 | 1.44E-01 |
| 577 | miR-627-3p(1)   | 0.000211 | 0.000551  | -2.6 | 1.38E-01 | 2.39E-01 |
| 578 | miR-214-5p(1)   | 0.006480 | 0.016689  | -2.6 | 1.96E-02 | 5.32E-02 |
| 579 | miR-708(1)      | 0.039583 | 0.101922  | -2.6 | 3.26E-02 | 7.64E-02 |
| 583 | miR-1307-5p(1)  | 0.017573 | 0.048654  | -2.8 | 2.54E-02 | 6.34E-02 |
| 587 | miR-532-3p(1)   | 0.007502 | 0.021982  | -2.9 | 1.11E-02 | 3.35E-02 |
| 588 | miR-335-5p(1)   | 0.048544 | 0.142437  | -2.9 | 1.99E-02 | 5.38E-02 |
| 590 | miR-328(1)      | 0.002034 | 0.006316  | -3.1 | 3.77E-02 | 8.51E-02 |
| 595 | miR-199a-3p(3)  | 1.369158 | 4.394329  | -3.2 | 9.51E-03 | 2.91E-02 |
| 598 | miR-331(1)      | 0.007589 | 0.025131  | -3.3 | 6.36E-03 | 2.06E-02 |
| 600 | let-7iSTAR(1)   | 0.004761 | 0.015868  | -3.3 | 2.21E-02 | 5.87E-02 |
| 601 | miR-190b(1)     | 0.000301 | 0.001023  | -3.4 | 4.83E-02 | 1.04E-01 |
| 602 | miR-10b(1)      | 0.295743 | 1.007341  | -3.4 | 1.14E-01 | 2.04E-01 |
| 605 | miR-124(3)      | 0.000170 | 0.000618  | -3.6 | 4.67E-02 | 1.01E-01 |
| 606 | miR-98STAR(1)   | 0.000367 | 0.001342  | -3.6 | 1.70E-02 | 4.77E-02 |
| 608 | miR-592(1)      | 0.000040 | 0.000159  | -3.6 | 1.24E-01 | 2.18E-01 |
| 609 | let-7f-2STAR(1) | 0.000427 | 0.001577  | -3.7 | 2.29E-02 | 5.98E-02 |
| 611 | miR-190a(1)     | 0.010198 | 0.038271  | -3.8 | 6.57E-03 | 2.11E-02 |
| 612 | miR-186STAR(1)  | 0.000327 | 0.001252  | -3.8 | 3.05E-02 | 7.31E-02 |
| 613 | miR-26a(2)      | 1.448218 | 5.510154  | -3.8 | 5.19E-03 | 1.72E-02 |
| 614 | let-7f(2)       | 1.702556 | 6.594766  | -3.9 | 5.95E-03 | 1.95E-02 |
| 615 | miR-181a(2)     | 0.184238 | 0.714227  | -3.9 | 1.65E-03 | 6.24E-03 |
| 616 | miR-146a(1)     | 0.067043 | 0.260436  | -3.9 | 3.10E-02 | 7.35E-02 |
| 617 | miR-570-5p(1)   | 0.000085 | 0.000348  | -3.9 | 1.11E-01 | 2.01E-01 |
| 619 | miR-33aSTAR(1)  | 0.000843 | 0.003343  | -4.0 | 2.69E-02 | 6.60E-02 |
| 621 | miR-28-3p(1)    | 0.033023 | 0.132554  | -4.0 | 5.40E-04 | 2.57E-03 |
| 622 | miR-342STAR(1)  | 0.000673 | 0.002756  | -4.1 | 7.14E-02 | 1.42E-01 |
| 623 | miR-10bSTAR(1)  | 0.004072 | 0.016769  | -4.1 | 3.61E-03 | 1.25E-02 |
| 624 | miR-361-3p(1)   | 0.003658 | 0.015206  | -4.1 | 2.97E-04 | 1.56E-03 |
| 625 | miR-19b(2)      | 0.287118 | 1.201096  | -4.2 | 8.20E-04 | 3.48E-03 |

|     | A               | B        | C        | D    | E        | F        |
|-----|-----------------|----------|----------|------|----------|----------|
| 626 | miR-887(1)      | 0.004051 | 0.017209 | -4.2 | 1.04E-02 | 3.15E-02 |
| 627 | miR-320(1)      | 0.218329 | 0.935921 | -4.3 | 2.26E-04 | 1.24E-03 |
| 628 | miR-190aSTAR(1) | 0.000296 | 0.001285 | -4.3 | 6.30E-02 | 1.28E-01 |
| 629 | miR-193b(1)     | 0.044031 | 0.191975 | -4.4 | 7.36E-04 | 3.26E-03 |
| 630 | miR-199b-5p(1)  | 0.126319 | 0.555891 | -4.4 | 1.21E-02 | 3.59E-02 |
| 631 | miR-29c(1)      | 0.025070 | 0.110747 | -4.4 | 1.38E-02 | 4.00E-02 |
| 632 | miR-125a(1)     | 0.061726 | 0.274388 | -4.4 | 5.78E-04 | 2.70E-03 |
| 633 | miR-708STAR(1)  | 0.001532 | 0.006943 | -4.5 | 2.29E-02 | 5.98E-02 |
| 634 | miR-652(1)      | 0.010737 | 0.049542 | -4.6 | 7.56E-04 | 3.32E-03 |
| 635 | let-7d(1)       | 0.115560 | 0.535645 | -4.6 | 3.25E-02 | 7.64E-02 |
| 637 | miR-455-5p(1)   | 0.005677 | 0.027205 | -4.8 | 5.86E-03 | 1.93E-02 |
| 639 | miR-455-3p(1)   | 0.020831 | 0.103256 | -5.0 | 8.91E-04 | 3.71E-03 |
| 640 | miR-192(1)      | 0.006606 | 0.033213 | -5.0 | 6.17E-04 | 2.85E-03 |
| 643 | miR-30c(2)      | 0.068835 | 0.359491 | -5.2 | 1.75E-04 | 1.02E-03 |
| 644 | miR-23b(1)      | 0.209062 | 1.110072 | -5.3 | 5.94E-05 | 4.43E-04 |
| 645 | let-7gSTAR(1)   | 0.000327 | 0.001791 | -5.4 | 1.90E-02 | 5.21E-02 |
| 647 | miR-582STAR(1)  | 0.000336 | 0.001879 | -5.5 | 4.12E-02 | 9.19E-02 |
| 649 | miR-26bSTAR(1)  | 0.000613 | 0.003454 | -5.6 | 4.92E-02 | 1.05E-01 |
| 650 | miR-33a(1)      | 0.006584 | 0.036658 | -5.6 | 4.83E-04 | 2.36E-03 |
| 651 | miR-340STAR(1)  | 0.000251 | 0.001439 | -5.7 | 9.11E-04 | 3.78E-03 |
| 652 | miR-195STAR(1)  | 0.000251 | 0.001450 | -5.7 | 6.48E-02 | 1.31E-01 |
| 653 | miR-23bSTAR(1)  | 0.000512 | 0.002962 | -5.8 | 4.60E-02 | 1.00E-01 |
| 654 | miR-362-3p(1)   | 0.001810 | 0.010505 | -5.8 | 1.03E-02 | 3.14E-02 |
| 655 | miR-486STAR(1)  | 0.000080 | 0.000522 | -6.0 | 1.16E-01 | 2.07E-01 |
| 656 | miR-378(1)      | 0.210141 | 1.254631 | -6.0 | 3.50E-05 | 2.86E-04 |
| 662 | miR-29cSTAR(1)  | 0.001296 | 0.007987 | -6.1 | 2.40E-02 | 6.18E-02 |
| 664 | miR-874(1)      | 0.003580 | 0.022289 | -6.2 | 6.51E-04 | 2.97E-03 |
| 665 | miR-548b(1)     | 0.000081 | 0.000534 | -6.2 | 8.77E-03 | 2.72E-02 |
| 667 | miR-125b-2STA   | 0.007489 | 0.048855 | -6.5 | 5.15E-05 | 3.98E-04 |
| 669 | miR-184(1)      | 0.000040 | 0.000294 | -6.6 | 8.70E-02 | 1.64E-01 |

|     | A             | B        | C        | D     | E        | F        |
|-----|---------------|----------|----------|-------|----------|----------|
| 671 | miR-181c(1)   | 0.004741 | 0.031415 | -6.6  | 1.32E-03 | 5.19E-03 |
| 672 | miR-181a-2STA | 0.002691 | 0.018239 | -6.8  | 7.63E-03 | 2.40E-02 |
| 673 | miR-585STAR(1 | 0.000040 | 0.000314 | -6.8  | 5.23E-02 | 1.11E-01 |
| 674 | miR-195(1)    | 0.040412 | 0.280148 | -6.9  | 2.70E-02 | 6.60E-02 |
| 676 | miR-550-3p(3) | 0.000121 | 0.000880 | -7.0  | 2.47E-02 | 6.24E-02 |
| 678 | miR-378STAR(1 | 0.001431 | 0.010110 | -7.1  | 3.82E-04 | 1.92E-03 |
| 681 | miR-181b-2STA | 0.000040 | 0.000341 | -7.6  | 2.18E-02 | 5.82E-02 |
| 683 | miR-145STAR(1 | 0.010136 | 0.080254 | -7.9  | 2.35E-02 | 6.11E-02 |
| 684 | miR-615(1)    | 0.000261 | 0.002115 | -8.1  | 2.91E-02 | 7.02E-02 |
| 685 | miR-574-3p(1) | 0.010686 | 0.087547 | -8.2  | 1.47E-05 | 1.40E-04 |
| 686 | miR-874STAR(1 | 0.000216 | 0.001778 | -8.3  | 6.41E-03 | 2.06E-02 |
| 687 | miR-598(1)    | 0.000497 | 0.004197 | -8.4  | 2.95E-04 | 1.56E-03 |
| 689 | miR-497(1)    | 0.055990 | 0.479853 | -8.6  | 4.59E-06 | 6.09E-05 |
| 691 | miR-181cSTAR( | 0.000734 | 0.006388 | -8.6  | 3.22E-04 | 1.67E-03 |
| 692 | miR-582(1)    | 0.000457 | 0.004051 | -8.7  | 2.44E-02 | 6.19E-02 |
| 695 | miR-146bSTAR( | 0.000090 | 0.000851 | -9.3  | 8.40E-02 | 1.60E-01 |
| 696 | let-7cSTAR(1) | 0.000126 | 0.001228 | -9.4  | 6.95E-04 | 3.11E-03 |
| 697 | miR-561(1)    | 0.000045 | 0.000444 | -9.8  | 1.48E-02 | 4.22E-02 |
| 698 | miR-101-2STAR | 0.000040 | 0.000439 | -9.8  | 8.40E-02 | 1.60E-01 |
| 699 | miR-194(2)    | 0.001974 | 0.019662 | -9.9  | 7.16E-05 | 5.16E-04 |
| 700 | miR-3617(1)   | 0.000045 | 0.000520 | -10.2 | 8.64E-02 | 1.64E-01 |
| 701 | miR-146b(1)   | 0.021894 | 0.230151 | -10.5 | 3.29E-05 | 2.81E-04 |
| 702 | miR-2110(1)   | 0.000341 | 0.004034 | -11.7 | 2.51E-05 | 2.27E-04 |
| 703 | let-7c(1)     | 0.090630 | 1.074958 | -11.9 | 4.03E-03 | 1.38E-02 |
| 704 | miR-106aSTAR( | 0.000040 | 0.000539 | -11.9 | 5.02E-03 | 1.68E-02 |
| 706 | miR-139(1)    | 0.002196 | 0.029298 | -13.3 | 1.44E-04 | 9.05E-04 |
| 707 | miR-105(2)    | 0.000000 | 0.000053 | -13.4 | 8.89E-02 | 1.66E-01 |
| 708 | miR-153-1STAR | 0.000000 | 0.000068 | -13.6 | 1.24E-01 | 2.18E-01 |
| 709 | miR-101(2)    | 0.079781 | 1.097522 | -13.8 | 8.52E-07 | 1.72E-05 |
| 710 | miR-20b(1)    | 0.000905 | 0.012596 | -13.8 | 9.89E-06 | 1.14E-04 |

|     | A              | B        | C        | D     | E        | F        |
|-----|----------------|----------|----------|-------|----------|----------|
| 712 | miR-652STAR(1) | 0.000356 | 0.004870 | -13.9 | 1.84E-02 | 5.06E-02 |
| 714 | miR-30b(1)     | 0.025526 | 0.361902 | -14.2 | 4.41E-06 | 6.05E-05 |
| 715 | miR-202(1)     | 0.000251 | 0.003797 | -14.8 | 2.03E-03 | 7.44E-03 |
| 716 | miR-149(1)     | 0.002870 | 0.043176 | -15.0 | 3.41E-04 | 1.76E-03 |
| 717 | miR-486(1)     | 0.002942 | 0.044775 | -15.2 | 2.18E-06 | 3.79E-05 |
| 718 | miR-143STAR(1) | 0.011729 | 0.179024 | -15.3 | 3.15E-03 | 1.10E-02 |
| 719 | miR-4772-5p(1) | 0.000000 | 0.000077 | -15.8 | 7.75E-02 | 1.49E-01 |
| 720 | miR-142-3p(1)  | 0.008980 | 0.143444 | -16.0 | 2.86E-06 | 4.51E-05 |
| 721 | miR-33b(1)     | 0.000381 | 0.006140 | -16.0 | 2.96E-03 | 1.04E-02 |
| 722 | miR-3064-3p(1) | 0.000000 | 0.000078 | -16.0 | 7.75E-02 | 1.49E-01 |
| 723 | miR-9STAR(3)   | 0.000170 | 0.002884 | -16.6 | 2.41E-03 | 8.57E-03 |
| 724 | miR-145(1)     | 0.166196 | 2.768055 | -16.7 | 2.97E-03 | 1.04E-02 |
| 725 | miR-577(1)     | 0.000000 | 0.000088 | -18.2 | 5.97E-02 | 1.24E-01 |
| 728 | miR-363STAR(1) | 0.000000 | 0.000080 | -18.5 | 3.49E-02 | 8.05E-02 |
| 729 | miR-216b(1)    | 0.000000 | 0.000081 | -18.9 | 3.65E-02 | 8.29E-02 |
| 730 | miR-2681(1)    | 0.000000 | 0.000099 | -20.3 | 4.53E-02 | 9.95E-02 |
| 731 | miR-3620-3p(1) | 0.000000 | 0.000097 | -20.5 | 6.98E-02 | 1.39E-01 |
| 733 | miR-126-3p(1)  | 0.055793 | 1.227377 | -22.0 | 1.05E-07 | 2.90E-06 |
| 734 | miR-4772-3p(1) | 0.000000 | 0.000107 | -22.3 | 3.06E-02 | 7.31E-02 |
| 735 | miR-9(3)       | 0.001065 | 0.024679 | -23.0 | 2.05E-04 | 1.14E-03 |
| 736 | miR-3690(2)    | 0.000000 | 0.000122 | -23.6 | 6.24E-02 | 1.28E-01 |
| 737 | miR-346(1)     | 0.000000 | 0.000121 | -23.8 | 4.07E-02 | 9.12E-02 |
| 738 | miR-4705(1)    | 0.000000 | 0.000115 | -24.0 | 2.79E-02 | 6.77E-02 |
| 739 | miR-95STAR(1)  | 0.000000 | 0.000114 | -24.0 | 1.23E-01 | 2.17E-01 |
| 740 | miR-204STAR(1) | 0.000000 | 0.000115 | -25.0 | 5.84E-02 | 1.22E-01 |
| 741 | miR-1976(1)    | 0.000000 | 0.000133 | -25.1 | 3.06E-02 | 7.31E-02 |
| 742 | miR-873STAR(1) | 0.000000 | 0.000124 | -25.6 | 2.36E-02 | 6.13E-02 |
| 743 | miR-873(1)     | 0.000081 | 0.002294 | -26.5 | 2.01E-04 | 1.13E-03 |
| 744 | miR-99a(1)     | 0.088938 | 2.368637 | -26.6 | 1.26E-05 | 1.29E-04 |
| 745 | miR-139STAR(1) | 0.000206 | 0.005757 | -27.1 | 4.48E-04 | 2.21E-03 |

|     | A              | B        | C        | D     | E        | F        |
|-----|----------------|----------|----------|-------|----------|----------|
| 746 | miR-551b(1)    | 0.000080 | 0.002370 | -27.2 | 2.10E-03 | 7.64E-03 |
| 747 | miR-204(1)     | 0.000382 | 0.010612 | -27.6 | 2.23E-05 | 2.04E-04 |
| 748 | miR-1(2)       | 0.014442 | 0.407418 | -28.2 | 5.88E-04 | 2.73E-03 |
| 749 | miR-429STAR(1  | 0.000000 | 0.000130 | -28.6 | 4.29E-02 | 9.48E-02 |
| 750 | miR-508STAR(1  | 0.000000 | 0.000146 | -30.3 | 1.27E-01 | 2.22E-01 |
| 751 | miR-182STAR(1  | 0.000000 | 0.000158 | -30.5 | 1.63E-02 | 4.58E-02 |
| 752 | miR-192STAR(1  | 0.000000 | 0.000145 | -31.6 | 3.29E-02 | 7.67E-02 |
| 753 | miR-101-1STAR  | 0.000497 | 0.016112 | -32.0 | 4.71E-07 | 1.00E-05 |
| 754 | miR-338-3p(1)  | 0.001482 | 0.048033 | -32.2 | 1.39E-05 | 1.36E-04 |
| 755 | miR-126-5p(1)  | 0.010205 | 0.337820 | -33.1 | 8.24E-08 | 2.50E-06 |
| 756 | miR-3130-5p(1) | 0.000000 | 0.000165 | -33.6 | 5.19E-02 | 1.10E-01 |
| 757 | miR-506(1)     | 0.000040 | 0.001591 | -34.6 | 8.87E-04 | 3.71E-03 |
| 758 | miR-210(1)     | 0.015151 | 0.525164 | -34.7 | 7.12E-07 | 1.48E-05 |
| 759 | miR-510-5p(1)  | 0.000000 | 0.000184 | -35.3 | 1.98E-02 | 5.36E-02 |
| 760 | miR-200cSTAR(  | 0.000040 | 0.001640 | -35.6 | 1.57E-03 | 6.02E-03 |
| 761 | miR-142-5p(1)  | 0.003632 | 0.130366 | -35.8 | 3.21E-05 | 2.78E-04 |
| 762 | miR-133b(1)    | 0.000040 | 0.001663 | -36.3 | 2.38E-02 | 6.13E-02 |
| 763 | miR-99aSTAR(1  | 0.000266 | 0.009615 | -36.6 | 1.68E-04 | 1.01E-03 |
| 764 | miR-451(1)     | 0.055214 | 2.033822 | -36.8 | 2.26E-04 | 1.24E-03 |
| 765 | miR-497STAR(1  | 0.000080 | 0.003297 | -37.9 | 4.35E-03 | 1.47E-02 |
| 766 | miR-135bSTAR(  | 0.000000 | 0.000182 | -38.1 | 4.75E-02 | 1.03E-01 |
| 767 | miR-218-2STAR  | 0.000000 | 0.000188 | -39.3 | 7.42E-03 | 2.34E-02 |
| 768 | miR-510-3p(1)  | 0.000000 | 0.000193 | -40.8 | 3.20E-02 | 7.56E-02 |
| 769 | miR-95(1)      | 0.000246 | 0.010486 | -41.2 | 6.84E-06 | 8.68E-05 |
| 770 | miR-133a(2)    | 0.001322 | 0.055050 | -41.4 | 4.59E-03 | 1.55E-02 |
| 771 | miR-183(1)     | 0.000678 | 0.031322 | -46.0 | 8.13E-08 | 2.50E-06 |
| 772 | miR-1295(1)    | 0.000000 | 0.000231 | -47.1 | 5.89E-02 | 1.23E-01 |
| 773 | miR-556-5p(1)  | 0.000000 | 0.000231 | -47.5 | 7.08E-02 | 1.41E-01 |
| 774 | miR-944STAR(1  | 0.000000 | 0.000227 | -48.6 | 2.29E-02 | 5.98E-02 |
| 775 | miR-372(1)     | 0.000000 | 0.000242 | -51.6 | 5.64E-02 | 1.18E-01 |



|     | A                | B        | C        | D     | E        | F        |
|-----|------------------|----------|----------|-------|----------|----------|
| 776 | miR-182(1)       | 0.001667 | 0.086833 | -51.9 | 2.26E-10 | 3.55E-08 |
| 777 | miR-504(1)       | 0.000085 | 0.004625 | -52.2 | 2.74E-06 | 4.40E-05 |
| 778 | miR-211STAR(1)   | 0.000000 | 0.000284 | -56.6 | 6.40E-03 | 2.06E-02 |
| 779 | miR-144STAR(1)   | 0.000763 | 0.043365 | -56.7 | 2.00E-04 | 1.13E-03 |
| 780 | miR-676(1)       | 0.000000 | 0.000290 | -57.0 | 2.49E-02 | 6.26E-02 |
| 781 | miR-489(1)       | 0.000000 | 0.000312 | -57.3 | 3.29E-02 | 7.67E-02 |
| 782 | miR-200aSTAR(1)  | 0.000040 | 0.002689 | -57.8 | 8.64E-04 | 3.65E-03 |
| 783 | miR-20bSTAR(1)   | 0.000000 | 0.000283 | -59.6 | 8.07E-04 | 3.45E-03 |
| 784 | miR-934(1)       | 0.000000 | 0.000293 | -59.9 | 1.78E-02 | 4.96E-02 |
| 785 | miR-153(2)       | 0.000246 | 0.015426 | -60.9 | 1.69E-04 | 1.01E-03 |
| 786 | miR-187(1)       | 0.000040 | 0.002871 | -62.4 | 1.34E-05 | 1.33E-04 |
| 787 | miR-153-2STAR(1) | 0.000000 | 0.000302 | -62.9 | 1.79E-02 | 4.98E-02 |
| 788 | miR-135a(2)      | 0.000000 | 0.000312 | -63.6 | 6.29E-04 | 2.89E-03 |
| 789 | miR-129-1-3p(1)  | 0.000000 | 0.000325 | -67.3 | 3.62E-03 | 1.25E-02 |
| 790 | miR-514b-5p(1)   | 0.000000 | 0.000323 | -67.7 | 1.73E-02 | 4.85E-02 |
| 791 | miR-183STAR(1)   | 0.000000 | 0.000348 | -69.0 | 6.60E-04 | 3.00E-03 |
| 792 | miR-141STAR(1)   | 0.000040 | 0.003210 | -69.5 | 1.16E-03 | 4.64E-03 |
| 793 | miR-2110STAR(1)  | 0.000000 | 0.000354 | -69.9 | 2.55E-02 | 6.36E-02 |
| 794 | miR-1247STAR(1)  | 0.000000 | 0.000364 | -73.0 | 2.45E-02 | 6.19E-02 |
| 795 | miR-148aSTAR(1)  | 0.000161 | 0.012806 | -75.4 | 5.23E-09 | 2.96E-07 |
| 796 | miR-675-3p(1)    | 0.000040 | 0.003494 | -75.7 | 2.36E-03 | 8.47E-03 |
| 797 | miR-144(1)       | 0.003959 | 0.302408 | -76.2 | 1.80E-04 | 1.03E-03 |
| 798 | miR-223(1)       | 0.000457 | 0.035462 | -76.6 | 2.63E-07 | 6.39E-06 |
| 799 | miR-96(1)        | 0.000251 | 0.019914 | -77.8 | 3.49E-05 | 2.86E-04 |
| 800 | miR-511-5p(2)    | 0.000000 | 0.000395 | -79.5 | 1.77E-03 | 6.55E-03 |
| 801 | miR-885(1)       | 0.000000 | 0.000416 | -79.8 | 4.17E-02 | 9.26E-02 |
| 802 | miR-551a(1)      | 0.000000 | 0.000402 | -83.4 | 9.51E-04 | 3.92E-03 |
| 803 | miR-150STAR(1)   | 0.000000 | 0.000427 | -84.1 | 2.37E-03 | 8.47E-03 |
| 804 | miR-876-3p(1)    | 0.000000 | 0.000414 | -85.8 | 2.70E-02 | 6.60E-02 |
| 805 | miR-499STAR(1)   | 0.000000 | 0.000444 | -91.3 | 9.22E-03 | 2.83E-02 |

|     | A               | B        | C        | D      | E        | F        |
|-----|-----------------|----------|----------|--------|----------|----------|
| 806 | miR-150(1)      | 0.000346 | 0.033068 | -95.6  | 4.37E-05 | 3.41E-04 |
| 807 | miR-675-5p(1)   | 0.000040 | 0.004437 | -96.1  | 1.70E-04 | 1.01E-03 |
| 808 | miR-1247(1)     | 0.000045 | 0.004746 | -100.4 | 7.16E-05 | 5.16E-04 |
| 809 | miR-223STAR(1)  | 0.000000 | 0.000518 | -105.0 | 2.92E-04 | 1.56E-03 |
| 810 | miR-514b-3p(1)  | 0.000000 | 0.000564 | -114.5 | 1.28E-03 | 5.09E-03 |
| 811 | miR-653-5p(1)   | 0.000000 | 0.000623 | -117.0 | 3.86E-03 | 1.32E-02 |
| 812 | miR-488(1)      | 0.000045 | 0.005602 | -118.6 | 1.26E-04 | 8.09E-04 |
| 813 | miR-483-5p(1)   | 0.000080 | 0.010535 | -120.6 | 8.03E-04 | 3.45E-03 |
| 814 | miR-208a(1)     | 0.000000 | 0.000636 | -121.3 | 6.31E-02 | 1.28E-01 |
| 815 | miR-363(1)      | 0.000287 | 0.037352 | -126.9 | 1.31E-11 | 6.25E-09 |
| 816 | miR-944(1)      | 0.000040 | 0.005925 | -127.8 | 3.58E-05 | 2.89E-04 |
| 817 | miR-211(1)      | 0.000247 | 0.034175 | -134.8 | 1.56E-07 | 3.91E-06 |
| 818 | miR-876-5p(1)   | 0.000000 | 0.000670 | -136.8 | 9.67E-03 | 2.95E-02 |
| 819 | miR-513b(1)     | 0.000000 | 0.000703 | -143.0 | 1.68E-03 | 6.33E-03 |
| 820 | miR-509-3-5p(1) | 0.000000 | 0.000731 | -145.8 | 2.10E-03 | 7.64E-03 |
| 821 | miR-513c-3p(1)  | 0.000000 | 0.000731 | -147.3 | 5.67E-04 | 2.66E-03 |
| 822 | miR-513c-5p(1)  | 0.000000 | 0.000757 | -154.0 | 1.92E-03 | 7.06E-03 |
| 823 | miR-513a-3p(2)  | 0.000000 | 0.000764 | -154.4 | 1.11E-02 | 3.35E-02 |
| 824 | miR-513a-5p(2)  | 0.000000 | 0.000784 | -158.9 | 4.04E-04 | 2.02E-03 |
| 825 | miR-196bSTAR(1) | 0.000000 | 0.000848 | -169.3 | 2.64E-04 | 1.43E-03 |
| 826 | miR-3910(1)     | 0.000000 | 0.000902 | -182.6 | 1.57E-03 | 6.02E-03 |
| 827 | miR-200c(1)     | 0.003194 | 0.587965 | -183.5 | 3.10E-06 | 4.71E-05 |
| 828 | miR-375(1)      | 0.000045 | 0.008830 | -186.2 | 3.00E-05 | 2.63E-04 |
| 829 | miR-148a(1)     | 0.028686 | 6.204235 | -216.2 | 1.47E-11 | 6.25E-09 |
| 830 | miR-200b(1)     | 0.001955 | 0.425736 | -216.5 | 3.05E-07 | 7.20E-06 |
| 831 | miR-141(1)      | 0.009787 | 2.157410 | -220.3 | 3.44E-05 | 2.86E-04 |
| 832 | miR-3659(1)     | 0.000000 | 0.001347 | -269.3 | 7.35E-04 | 3.26E-03 |
| 833 | miR-508(1)      | 0.000045 | 0.013871 | -293.4 | 7.31E-05 | 5.21E-04 |
| 834 | miR-429(1)      | 0.000126 | 0.040148 | -308.2 | 3.58E-08 | 1.32E-06 |
| 835 | miR-203(1)      | 0.019576 | 6.199758 | -316.6 | 2.53E-06 | 4.14E-05 |

|     | A                 | B        | C        | D       | E        | F        |
|-----|-------------------|----------|----------|---------|----------|----------|
| 836 | miR-205(1)        | 0.007318 | 2.430434 | -331.7  | 4.39E-06 | 6.05E-05 |
| 837 | miR-210STAR(1)    | 0.000000 | 0.001696 | -338.1  | 1.24E-04 | 8.07E-04 |
| 838 | miR-585(1)        | 0.000000 | 0.001757 | -352.8  | 1.05E-05 | 1.16E-04 |
| 839 | miR-196b(1)       | 0.000201 | 0.084282 | -400.6  | 4.42E-04 | 2.20E-03 |
| 840 | miR-196a(2)       | 0.000292 | 0.128007 | -431.2  | 5.51E-04 | 2.60E-03 |
| 841 | miR-200a(1)       | 0.000699 | 0.305010 | -431.4  | 2.30E-06 | 3.83E-05 |
| 842 | miR-203STAR(1)    | 0.000166 | 0.084670 | -493.5  | 3.63E-05 | 2.89E-04 |
| 843 | miR-514aSTAR(1)   | 0.000000 | 0.002487 | -498.0  | 2.36E-03 | 8.47E-03 |
| 844 | miR-200bSTAR(1)   | 0.000000 | 0.004212 | -838.3  | 1.71E-04 | 1.01E-03 |
| 845 | miR-133aSTAR(1)   | 0.000000 | 0.005114 | -1020.2 | 1.18E-03 | 4.72E-03 |
| 846 | miR-483-3p(1)     | 0.000000 | 0.005330 | -1067.3 | 7.58E-04 | 3.32E-03 |
| 847 | miR-511-3p(2)     | 0.000000 | 0.005414 | -1074.4 | 4.64E-07 | 1.00E-05 |
| 848 | miR-205STAR(1)    | 0.000000 | 0.005473 | -1093.1 | 1.36E-03 | 5.33E-03 |
| 849 | miR-338-5p(1)     | 0.000000 | 0.009415 | -1875.5 | 1.24E-05 | 1.29E-04 |
| 850 | miR-196a-2STAR(1) | 0.000000 | 0.010971 | -2190.5 | 7.35E-05 | 5.21E-04 |
| 851 | miR-509-3p(3)     | 0.000000 | 0.016208 | -3231.3 | 1.75E-04 | 1.02E-03 |
| 852 | miR-514a(3)       | 0.000000 | 0.043465 | -8655.0 | 3.30E-05 | 2.81E-04 |

|    | A              | B                      | C        | D           | E        | F        |
|----|----------------|------------------------|----------|-------------|----------|----------|
| 1  |                | Relative frequency (%) |          |             |          |          |
| 2  | miRNA          | iPSC                   | NS       | Fold change | P Value  | FDR      |
| 3  | miR-302a-5p(1) | 7.684089               | 0.000000 | 1529696.4   | 9.10E-16 | 1.55E-13 |
| 4  | miR-302b(1)    | 7.425915               | 0.000000 | 1478301.2   | 3.50E-12 | 9.02E-11 |
| 5  | miR-302a-3p(1) | 3.136755               | 0.000000 | 624445.0    | 1.36E-16 | 5.77E-14 |
| 6  | miR-367(1)     | 2.118497               | 0.000000 | 421736.5    | 1.17E-11 | 2.31E-10 |
| 7  | miR-302c(1)    | 2.010993               | 0.000000 | 400335.7    | 2.19E-12 | 6.65E-11 |
| 8  | miR-302d(1)    | 3.374166               | 0.000005 | 332555.5    | 5.54E-13 | 2.14E-11 |
| 9  | miR-302cSTAR(  | 0.494700               | 0.000000 | 98482.8     | 2.53E-10 | 2.76E-09 |
| 10 | miR-302bSTAR(  | 0.038129               | 0.000000 | 7591.4      | 8.20E-10 | 6.90E-09 |
| 11 | miR-302dSTAR(  | 0.027499               | 0.000000 | 5476.0      | 5.90E-09 | 3.86E-08 |
| 12 | miR-367STAR(1  | 0.007508               | 0.000000 | 1496.8      | 8.07E-07 | 2.97E-06 |
| 13 | miR-448(1)     | 0.005627               | 0.000000 | 1121.9      | 3.83E-07 | 1.60E-06 |
| 14 | miR-1251(1)    | 0.004903               | 0.000000 | 976.5       | 1.88E-07 | 8.40E-07 |
| 15 | miR-1298(1)    | 0.026168               | 0.000023 | 787.1       | 2.45E-08 | 1.35E-07 |
| 16 | miR-371(1)     | 0.037909               | 0.000048 | 605.7       | 8.89E-08 | 4.27E-07 |
| 17 | miR-124STAR(3  | 0.002861               | 0.000000 | 570.3       | 8.54E-07 | 3.13E-06 |
| 18 | miR-105(2)     | 0.025895               | 0.000053 | 385.7       | 7.15E-09 | 4.50E-08 |
| 19 | miR-92a-2STAR  | 0.001864               | 0.000000 | 372.2       | 1.29E-05 | 3.56E-05 |
| 20 | miR-373(1)     | 0.036836               | 0.000087 | 347.3       | 1.38E-08 | 7.95E-08 |
| 21 | miR-498(1)     | 0.014274               | 0.000034 | 326.9       | 4.24E-09 | 2.88E-08 |
| 22 | miR-1911(1)    | 0.003334               | 0.000009 | 222.6       | 4.69E-07 | 1.91E-06 |
| 23 | miR-767(1)     | 0.009230               | 0.000029 | 219.6       | 9.73E-10 | 8.03E-09 |
| 24 | miR-372(1)     | 0.050289               | 0.000242 | 194.2       | 5.47E-07 | 2.16E-06 |
| 25 | miR-1911STAR(  | 0.000950               | 0.000000 | 190.8       | 9.62E-04 | 1.76E-03 |
| 26 | miR-135a-2STA  | 0.007162               | 0.000028 | 190.1       | 8.07E-07 | 2.97E-06 |
| 27 | miR-219-2-3p(1 | 0.000940               | 0.000000 | 188.6       | 1.14E-03 | 2.06E-03 |
| 28 | miR-135a(2)    | 0.056980               | 0.000312 | 178.5       | 4.57E-12 | 1.08E-10 |
| 29 | miR-520f-3p(1) | 0.026760               | 0.000158 | 178.2       | 1.03E-09 | 8.40E-09 |
| 30 | miR-512-3p(2)  | 0.096900               | 0.000636 | 156.8       | 2.65E-12 | 7.61E-11 |

|    | A              | B        | C        | D     | E        | F        |
|----|----------------|----------|----------|-------|----------|----------|
| 31 | miR-1912-3p(1) | 0.001472 | 0.000005 | 143.3 | 6.39E-05 | 1.53E-04 |
| 32 | miR-1323(1)    | 0.021066 | 0.000170 | 128.8 | 4.54E-06 | 1.39E-05 |
| 33 | miR-18bSTAR(1  | 0.004178 | 0.000024 | 126.6 | 1.66E-08 | 9.48E-08 |
| 34 | miR-124(3)     | 0.064359 | 0.000618 | 104.4 | 8.00E-10 | 6.87E-09 |
| 35 | miR-20b(1)     | 1.286201 | 0.012596 | 101.9 | 1.33E-11 | 2.57E-10 |
| 36 | miR-520e-3p(1) | 0.001942 | 0.000015 | 94.9  | 1.92E-06 | 6.52E-06 |
| 37 | miR-20bSTAR(1  | 0.027900 | 0.000283 | 93.2  | 5.07E-11 | 7.56E-10 |
| 38 | miR-1283-5p(2) | 0.016760 | 0.000257 | 86.2  | 6.27E-07 | 2.43E-06 |
| 39 | miR-525-5p(1)  | 0.009729 | 0.000116 | 80.6  | 2.17E-08 | 1.22E-07 |
| 40 | miR-519c-3p(1) | 0.006297 | 0.000087 | 80.3  | 3.31E-08 | 1.77E-07 |
| 41 | miR-577(1)     | 0.007302 | 0.000088 | 80.0  | 2.04E-07 | 9.05E-07 |
| 42 | miR-518d-3p(1) | 0.002351 | 0.000019 | 77.7  | 4.31E-06 | 1.33E-05 |
| 43 | miR-1276(1)    | 0.000720 | 0.000003 | 76.8  | 2.31E-05 | 6.20E-05 |
| 44 | miR-1264(1)    | 0.001756 | 0.000031 | 72.8  | 3.84E-04 | 7.53E-04 |
| 45 | miR-521-2STAR  | 0.000362 | 0.000000 | 71.6  | 2.70E-03 | 4.52E-03 |
| 46 | miR-1286(1)    | 0.001909 | 0.000032 | 70.3  | 3.05E-06 | 9.89E-06 |
| 47 | miR-520a-5p(1) | 0.019326 | 0.000300 | 69.8  | 7.87E-07 | 2.92E-06 |
| 48 | miR-18b(1)     | 0.092921 | 0.001321 | 69.4  | 8.15E-09 | 5.05E-08 |
| 49 | miR-1912-5p(1) | 0.000650 | 0.000004 | 67.1  | 1.39E-03 | 2.48E-03 |
| 50 | miR-498STAR(1  | 0.000626 | 0.000003 | 65.3  | 2.37E-05 | 6.33E-05 |
| 51 | miR-551aSTAR(  | 0.000301 | 0.000000 | 61.4  | 1.61E-03 | 2.83E-03 |
| 52 | miR-4802-3p(1) | 0.001411 | 0.000016 | 55.4  | 8.99E-05 | 2.06E-04 |
| 53 | miR-520e-5p(1) | 0.000268 | 0.000000 | 54.9  | 3.81E-04 | 7.47E-04 |
| 54 | miR-1304STAR(  | 0.013171 | 0.000241 | 54.6  | 5.23E-11 | 7.67E-10 |
| 55 | miR-518e-5p(5) | 0.010572 | 0.000206 | 54.5  | 1.50E-06 | 5.27E-06 |
| 56 | miR-3176(1)    | 0.002929 | 0.000070 | 50.8  | 9.94E-09 | 6.03E-08 |
| 57 | miR-371STAR(1  | 0.000851 | 0.000009 | 48.9  | 5.64E-04 | 1.06E-03 |
| 58 | miR-1305(1)    | 0.003069 | 0.000062 | 43.3  | 7.39E-08 | 3.65E-07 |
| 59 | miR-520a-3p(1) | 0.004387 | 0.000131 | 42.3  | 8.41E-08 | 4.08E-07 |
| 60 | miR-105STAR(2  | 0.000617 | 0.000008 | 42.3  | 1.52E-03 | 2.68E-03 |

|    | A              | B        | C        | D    | E        | F        |
|----|----------------|----------|----------|------|----------|----------|
| 61 | miR-92b(1)     | 0.265836 | 0.006344 | 41.8 | 5.19E-10 | 4.64E-09 |
| 62 | miR-519dSTAR(  | 0.000612 | 0.000008 | 41.7 | 1.13E-05 | 3.18E-05 |
| 63 | miR-1910(1)    | 0.000420 | 0.000005 | 41.2 | 3.30E-03 | 5.42E-03 |
| 64 | miR-1298STAR(  | 0.001236 | 0.000023 | 40.7 | 6.69E-05 | 1.59E-04 |
| 65 | miR-3192(1)    | 0.000418 | 0.000006 | 40.1 | 6.00E-04 | 1.12E-03 |
| 66 | miR-522-3p(1)  | 0.005322 | 0.000180 | 38.0 | 1.14E-08 | 6.80E-08 |
| 67 | miR-296-3p(1)  | 0.041671 | 0.001093 | 37.5 | 8.42E-09 | 5.15E-08 |
| 68 | miR-1270(2)    | 0.022856 | 0.000617 | 37.2 | 3.01E-09 | 2.10E-08 |
| 69 | miR-526a-1-3p( | 0.000622 | 0.000026 | 36.0 | 5.64E-04 | 1.06E-03 |
| 70 | miR-518d-5p(5) | 0.005249 | 0.000157 | 34.1 | 3.06E-05 | 7.89E-05 |
| 71 | miR-526b-5p(1) | 0.006889 | 0.000218 | 33.2 | 2.94E-07 | 1.26E-06 |
| 72 | miR-520b-3p(2) | 0.007370 | 0.000257 | 31.8 | 7.15E-08 | 3.62E-07 |
| 73 | miR-1266(1)    | 0.001002 | 0.000035 | 31.7 | 4.81E-04 | 9.23E-04 |
| 74 | miR-1303(1)    | 0.005411 | 0.000172 | 29.8 | 9.92E-07 | 3.57E-06 |
| 75 | miR-340(1)     | 0.087920 | 0.002997 | 29.3 | 6.85E-04 | 1.27E-03 |
| 76 | miR-363STAR(1  | 0.002723 | 0.000080 | 29.3 | 6.19E-07 | 2.41E-06 |
| 77 | miR-512-5p(2)  | 0.005807 | 0.000195 | 29.2 | 7.03E-07 | 2.66E-06 |
| 78 | miR-519a-1-5p( | 0.002630 | 0.000099 | 28.9 | 2.87E-07 | 1.24E-06 |
| 79 | miR-3175(1)    | 0.000453 | 0.000011 | 28.8 | 2.17E-03 | 3.70E-03 |
| 80 | miR-3677-3p(1) | 0.000920 | 0.000035 | 28.7 | 7.06E-05 | 1.67E-04 |
| 81 | miR-1252(1)    | 0.001011 | 0.000028 | 28.6 | 2.38E-05 | 6.33E-05 |
| 82 | miR-873STAR(1  | 0.003672 | 0.000124 | 28.6 | 7.32E-08 | 3.65E-07 |
| 83 | miR-520g-5p(2) | 0.000127 | 0.000000 | 27.8 | 3.63E-03 | 5.93E-03 |
| 84 | miR-1269(1)    | 0.000456 | 0.000023 | 27.8 | 5.15E-03 | 8.09E-03 |
| 85 | miR-128-1STAR  | 0.001524 | 0.000056 | 27.2 | 2.55E-05 | 6.76E-05 |
| 86 | miR-517STAR(3  | 0.000786 | 0.000051 | 26.0 | 1.17E-03 | 2.10E-03 |
| 87 | miR-767STAR(1  | 0.000343 | 0.000007 | 25.5 | 5.05E-03 | 7.98E-03 |
| 88 | miR-3938(1)    | 0.000249 | 0.000006 | 24.7 | 5.21E-03 | 8.15E-03 |
| 89 | miR-187STAR(1  | 0.000724 | 0.000020 | 24.0 | 4.68E-03 | 7.44E-03 |
| 90 | miR-373STAR(1  | 0.000221 | 0.000003 | 23.8 | 5.77E-03 | 8.94E-03 |

|     | A                | B        | C        | D    | E        | F        |
|-----|------------------|----------|----------|------|----------|----------|
| 91  | miR-524(1)       | 0.012191 | 0.000567 | 23.6 | 1.34E-05 | 3.66E-05 |
| 92  | miR-18aSTAR(1)   | 0.028168 | 0.001185 | 23.5 | 4.52E-09 | 3.03E-08 |
| 93  | miR-518b-5p(1)   | 0.000328 | 0.000007 | 22.6 | 2.41E-03 | 4.07E-03 |
| 94  | miR-129-5p(2)    | 0.012402 | 0.000526 | 22.6 | 1.95E-07 | 8.67E-07 |
| 95  | miR-3187(1)      | 0.002451 | 0.000098 | 22.1 | 1.55E-06 | 5.35E-06 |
| 96  | miR-363(1)       | 0.811498 | 0.037352 | 21.7 | 2.81E-11 | 4.87E-10 |
| 97  | miR-589-5p(1)    | 0.008967 | 0.000413 | 21.6 | 8.64E-08 | 4.17E-07 |
| 98  | miR-1276STAR(1)  | 0.000355 | 0.000023 | 21.1 | 6.17E-03 | 9.52E-03 |
| 99  | miR-183STAR(1)   | 0.007249 | 0.000348 | 20.9 | 1.72E-07 | 7.88E-07 |
| 100 | miR-517b(1)      | 0.005904 | 0.000318 | 20.2 | 4.12E-07 | 1.70E-06 |
| 101 | miR-3177(1)      | 0.001348 | 0.000065 | 20.0 | 9.61E-05 | 2.20E-04 |
| 102 | miR-187(1)       | 0.057823 | 0.002871 | 19.9 | 3.22E-07 | 1.38E-06 |
| 103 | miR-3664-3p(1)   | 0.001328 | 0.000063 | 19.7 | 4.18E-03 | 6.75E-03 |
| 104 | miR-106a(1)      | 0.372710 | 0.018926 | 19.7 | 7.51E-10 | 6.58E-09 |
| 105 | miR-5094-5p(1)   | 0.000201 | 0.000006 | 19.4 | 1.32E-02 | 1.93E-02 |
| 106 | miR-4746(1)      | 0.001165 | 0.000051 | 19.2 | 1.89E-04 | 4.01E-04 |
| 107 | miR-1908-3p(1)   | 0.000327 | 0.000010 | 18.8 | 7.29E-03 | 1.11E-02 |
| 108 | miR-519d(1)      | 0.009338 | 0.000522 | 18.8 | 6.95E-09 | 4.44E-08 |
| 109 | miR-520d-5p(1)   | 0.010727 | 0.000638 | 18.2 | 3.47E-05 | 8.76E-05 |
| 110 | miR-135bSTAR(1)  | 0.003365 | 0.000182 | 17.6 | 4.61E-04 | 8.86E-04 |
| 111 | miR-135b(1)      | 0.072418 | 0.004144 | 17.4 | 5.07E-07 | 2.02E-06 |
| 112 | miR-106aSTAR(1)  | 0.009567 | 0.000539 | 17.3 | 2.65E-06 | 8.67E-06 |
| 113 | miR-561STAR(1)   | 0.001845 | 0.000096 | 16.8 | 2.73E-04 | 5.57E-04 |
| 114 | miR-520g-3p(2)   | 0.009700 | 0.000633 | 16.7 | 1.82E-07 | 8.18E-07 |
| 115 | miR-523-3p(1)    | 0.001489 | 0.000095 | 16.7 | 1.62E-05 | 4.40E-05 |
| 116 | miR-19b-2STAR(1) | 0.000641 | 0.000029 | 16.3 | 4.34E-03 | 6.96E-03 |
| 117 | miR-183(1)       | 0.499232 | 0.031322 | 16.0 | 4.90E-08 | 2.55E-07 |
| 118 | miR-592(1)       | 0.002645 | 0.000159 | 15.7 | 6.12E-06 | 1.82E-05 |
| 119 | miR-2467(1)      | 0.000140 | 0.000004 | 15.3 | 8.79E-03 | 1.33E-02 |
| 120 | miR-18a(1)       | 0.653760 | 0.043217 | 15.1 | 2.38E-06 | 7.89E-06 |

|     | A              | B        | C        | D    | E        | F        |
|-----|----------------|----------|----------|------|----------|----------|
| 121 | miR-1283-2-3p( | 0.001651 | 0.000145 | 14.8 | 1.21E-03 | 2.17E-03 |
| 122 | miR-19aSTAR(1  | 0.001538 | 0.000091 | 14.4 | 3.06E-05 | 7.89E-05 |
| 123 | miR-518f-3p(1) | 0.003996 | 0.000290 | 14.1 | 3.99E-07 | 1.66E-06 |
| 124 | miR-130bSTAR(  | 0.034630 | 0.002519 | 13.7 | 1.07E-08 | 6.38E-08 |
| 125 | miR-517a(2)    | 0.026600 | 0.002021 | 13.5 | 1.25E-06 | 4.46E-06 |
| 126 | miR-1284-5p(1) | 0.000282 | 0.000013 | 13.4 | 7.39E-03 | 1.13E-02 |
| 127 | miR-516b(2)    | 0.021213 | 0.001621 | 13.4 | 5.23E-04 | 9.94E-04 |
| 128 | miR-518b-3p(1) | 0.010620 | 0.000841 | 13.2 | 2.20E-08 | 1.22E-07 |
| 129 | miR-515(2)     | 0.020967 | 0.001635 | 13.1 | 1.97E-04 | 4.16E-04 |
| 130 | miR-92a(2)     | 4.304079 | 0.342477 | 12.6 | 1.17E-09 | 9.19E-09 |
| 131 | miR-182STAR(1  | 0.001914 | 0.000158 | 12.5 | 1.70E-04 | 3.65E-04 |
| 132 | miR-1303STAR(  | 0.001245 | 0.000099 | 12.3 | 5.54E-03 | 8.60E-03 |
| 133 | miR-521(2)     | 0.002118 | 0.000208 | 12.2 | 2.35E-04 | 4.88E-04 |
| 134 | miR-873(1)     | 0.027837 | 0.002294 | 12.0 | 1.34E-05 | 3.66E-05 |
| 135 | miR-643(1)     | 0.001518 | 0.000115 | 11.9 | 2.61E-05 | 6.90E-05 |
| 136 | miR-19a(1)     | 1.565625 | 0.134484 | 11.6 | 2.62E-06 | 8.60E-06 |
| 137 | miR-519b-3p(1) | 0.003216 | 0.000281 | 11.6 | 1.14E-05 | 3.20E-05 |
| 138 | miR-518c-5p(1) | 0.000564 | 0.000063 | 11.4 | 2.82E-03 | 4.71E-03 |
| 139 | miR-20a(1)     | 1.582837 | 0.141330 | 11.2 | 2.30E-06 | 7.69E-06 |
| 140 | miR-518c-3p(1) | 0.013122 | 0.001287 | 10.6 | 9.31E-06 | 2.65E-05 |
| 141 | miR-519e-3p(1) | 0.000231 | 0.000015 | 10.3 | 6.34E-03 | 9.74E-03 |
| 142 | miR-561(1)     | 0.004788 | 0.000444 | 10.3 | 8.72E-05 | 2.01E-04 |
| 143 | miR-520f-5p(1) | 0.000112 | 0.000020 | 10.3 | 2.44E-02 | 3.43E-02 |
| 144 | miR-93(1)      | 2.969236 | 0.300083 | 9.9  | 1.21E-09 | 9.35E-09 |
| 145 | miR-92bSTAR(1  | 0.006401 | 0.000639 | 9.8  | 5.89E-07 | 2.31E-06 |
| 146 | miR-92a-1STAR  | 0.005557 | 0.000571 | 9.7  | 3.33E-05 | 8.44E-05 |
| 147 | miR-96(1)      | 0.189092 | 0.019914 | 9.5  | 4.10E-04 | 7.96E-04 |
| 148 | miR-491STAR(1  | 0.000844 | 0.000078 | 9.3  | 1.66E-03 | 2.92E-03 |
| 149 | miR-589-3p(1)  | 0.003043 | 0.000350 | 9.1  | 8.63E-07 | 3.15E-06 |
| 150 | miR-515STAR(2  | 0.005676 | 0.000669 | 8.8  | 5.35E-03 | 8.34E-03 |



|     | A              | B        | C        | D   | E        | F        |
|-----|----------------|----------|----------|-----|----------|----------|
| 151 | miR-301bSTAR(  | 0.000195 | 0.000017 | 8.4 | 1.18E-02 | 1.74E-02 |
| 152 | miR-519e-5p(1) | 0.000922 | 0.000103 | 8.4 | 1.15E-02 | 1.71E-02 |
| 153 | miR-942(1)     | 0.006486 | 0.000797 | 8.1 | 4.13E-06 | 1.29E-05 |
| 154 | miR-525-3p(1)  | 0.001681 | 0.000250 | 7.8 | 2.34E-03 | 3.96E-03 |
| 155 | miR-526b-3p(1) | 0.001195 | 0.000168 | 7.7 | 1.62E-03 | 2.85E-03 |
| 156 | miR-421(1)     | 0.020001 | 0.002637 | 7.6 | 1.19E-05 | 3.33E-05 |
| 157 | miR-548b(1)    | 0.004152 | 0.000534 | 7.6 | 3.98E-05 | 9.93E-05 |
| 158 | miR-524STAR(1  | 0.000472 | 0.000064 | 7.3 | 2.48E-03 | 4.16E-03 |
| 159 | miR-1277-5p(1) | 0.007801 | 0.001050 | 7.2 | 7.53E-03 | 1.15E-02 |
| 160 | miR-454STAR(1  | 0.001126 | 0.000150 | 7.2 | 2.46E-03 | 4.15E-03 |
| 161 | miR-556-5p(1)  | 0.001714 | 0.000231 | 7.2 | 2.05E-02 | 2.93E-02 |
| 162 | miR-3130-3p(1) | 0.000477 | 0.000059 | 6.9 | 1.76E-02 | 2.54E-02 |
| 163 | miR-1250(1)    | 0.000480 | 0.000060 | 6.8 | 2.69E-02 | 3.77E-02 |
| 164 | miR-760(1)     | 0.040234 | 0.006257 | 6.4 | 1.18E-04 | 2.63E-04 |
| 165 | miR-4802-5p(1) | 0.000217 | 0.000026 | 6.4 | 4.58E-02 | 6.15E-02 |
| 166 | miR-449a(1)    | 0.001556 | 0.000257 | 6.2 | 4.05E-03 | 6.55E-03 |
| 167 | miR-651(1)     | 0.016606 | 0.002692 | 6.2 | 7.57E-05 | 1.77E-04 |
| 168 | miR-1226STAR(  | 0.000152 | 0.000020 | 6.2 | 2.95E-02 | 4.10E-02 |
| 169 | miR-3138-3p(1) | 0.000227 | 0.000029 | 6.1 | 2.95E-02 | 4.10E-02 |
| 170 | miR-3065-3p(1) | 0.001696 | 0.000265 | 6.0 | 1.62E-02 | 2.35E-02 |
| 171 | miR-182(1)     | 0.515384 | 0.086833 | 5.9 | 5.02E-07 | 2.02E-06 |
| 172 | miR-544-3p(1)  | 0.002094 | 0.000345 | 5.7 | 1.10E-02 | 1.64E-02 |
| 173 | miR-335-3p(1)  | 0.043976 | 0.007702 | 5.7 | 3.60E-06 | 1.14E-05 |
| 174 | miR-520d-3p(1) | 0.000989 | 0.000202 | 5.7 | 2.48E-03 | 4.16E-03 |
| 175 | miR-130b(1)    | 0.200925 | 0.036762 | 5.5 | 1.34E-05 | 3.66E-05 |
| 176 | miR-3065-5p(1) | 0.005635 | 0.001021 | 5.5 | 5.40E-03 | 8.39E-03 |
| 177 | miR-615STAR(1  | 0.003378 | 0.000613 | 5.4 | 3.51E-04 | 6.96E-04 |
| 178 | miR-636(1)     | 0.000375 | 0.000069 | 5.3 | 7.69E-02 | 9.97E-02 |
| 179 | miR-877-3p(1)  | 0.001114 | 0.000214 | 5.2 | 7.67E-03 | 1.16E-02 |
| 180 | miR-9(3)       | 0.128588 | 0.024679 | 5.2 | 3.11E-03 | 5.14E-03 |

|     | A               | B        | C        | D   | E        | F        |
|-----|-----------------|----------|----------|-----|----------|----------|
| 181 | miR-128(2)      | 0.118420 | 0.023197 | 5.1 | 3.57E-05 | 8.96E-05 |
| 182 | miR-1306-3p(1)  | 0.001754 | 0.000340 | 5.1 | 3.54E-03 | 5.80E-03 |
| 183 | miR-17(1)       | 2.106523 | 0.426612 | 4.9 | 7.96E-06 | 2.30E-05 |
| 184 | miR-1284-3p(1)  | 0.000112 | 0.000016 | 4.9 | 1.05E-01 | 1.32E-01 |
| 185 | miR-301b(1)     | 0.016642 | 0.003387 | 4.9 | 1.73E-04 | 3.70E-04 |
| 186 | miR-505(1)      | 0.045638 | 0.009375 | 4.9 | 1.03E-04 | 2.34E-04 |
| 187 | miR-643STAR(1)  | 0.000142 | 0.000020 | 4.8 | 5.37E-02 | 7.10E-02 |
| 188 | miR-580(1)      | 0.000600 | 0.000128 | 4.8 | 3.87E-02 | 5.27E-02 |
| 189 | miR-545-5p(1)   | 0.002719 | 0.000553 | 4.8 | 9.17E-03 | 1.38E-02 |
| 190 | miR-937(1)      | 0.000429 | 0.000083 | 4.7 | 8.60E-02 | 1.11E-01 |
| 191 | miR-1301(1)     | 0.011495 | 0.002428 | 4.7 | 2.57E-04 | 5.29E-04 |
| 192 | miR-1226(1)     | 0.001915 | 0.000397 | 4.7 | 2.35E-03 | 3.97E-03 |
| 193 | miR-766STAR(1)  | 0.000286 | 0.000053 | 4.7 | 4.82E-02 | 6.42E-02 |
| 194 | miR-3200(1)     | 0.003289 | 0.000689 | 4.7 | 3.95E-04 | 7.71E-04 |
| 195 | miR-421STAR(1)  | 0.000229 | 0.000041 | 4.7 | 6.01E-02 | 7.92E-02 |
| 196 | miR-552-3p(1)   | 0.000184 | 0.000033 | 4.7 | 9.55E-02 | 1.22E-01 |
| 197 | miR-3944-3p(1)  | 0.000081 | 0.000012 | 4.6 | 6.29E-02 | 8.26E-02 |
| 198 | miR-521-1STAR   | 0.000084 | 0.000012 | 4.6 | 7.31E-02 | 9.51E-02 |
| 199 | miR-2355-3p(1)  | 0.002408 | 0.000521 | 4.5 | 1.15E-03 | 2.08E-03 |
| 200 | miR-7(3)        | 0.129736 | 0.028887 | 4.5 | 2.89E-05 | 7.54E-05 |
| 201 | miR-744(1)      | 0.126403 | 0.028298 | 4.5 | 3.55E-05 | 8.93E-05 |
| 202 | miR-330STAR(1)  | 0.004832 | 0.001091 | 4.4 | 5.01E-05 | 1.22E-04 |
| 203 | miR-106bSTAR(1) | 0.075888 | 0.017509 | 4.3 | 2.85E-04 | 5.71E-04 |
| 204 | miR-1180(1)     | 0.010204 | 0.002373 | 4.3 | 1.09E-04 | 2.45E-04 |
| 205 | miR-1256-3p(1)  | 0.000306 | 0.000080 | 4.2 | 9.63E-02 | 1.22E-01 |
| 206 | miR-653-3p(1)   | 0.001321 | 0.000355 | 4.1 | 4.40E-02 | 5.93E-02 |
| 207 | miR-505STAR(1)  | 0.002080 | 0.000500 | 4.1 | 1.61E-03 | 2.84E-03 |
| 208 | miR-1307-3p(1)  | 0.054830 | 0.013433 | 4.1 | 2.72E-03 | 4.54E-03 |
| 209 | miR-1237(1)     | 0.000272 | 0.000065 | 4.1 | 8.08E-02 | 1.04E-01 |
| 210 | miR-933(1)      | 0.000161 | 0.000032 | 4.0 | 1.09E-01 | 1.35E-01 |

|     | A                | B        | C        | D   | E        | F        |
|-----|------------------|----------|----------|-----|----------|----------|
| 211 | miR-744STAR(1)   | 0.002273 | 0.000563 | 3.9 | 2.10E-02 | 2.99E-02 |
| 212 | miR-25(1)        | 0.847973 | 0.216665 | 3.9 | 4.85E-05 | 1.19E-04 |
| 213 | miR-17STAR(1)    | 0.350267 | 0.089634 | 3.9 | 6.76E-05 | 1.61E-04 |
| 214 | miR-106b(1)      | 1.749095 | 0.454747 | 3.8 | 2.60E-04 | 5.33E-04 |
| 215 | miR-942STAR(1)   | 0.000291 | 0.000095 | 3.8 | 9.78E-02 | 1.24E-01 |
| 216 | miR-1229(1)      | 0.000257 | 0.000059 | 3.7 | 1.53E-01 | 1.87E-01 |
| 217 | miR-1296(1)      | 0.006853 | 0.001828 | 3.7 | 1.80E-03 | 3.14E-03 |
| 218 | miR-301aSTAR(1)  | 0.000591 | 0.000148 | 3.7 | 6.83E-02 | 8.90E-02 |
| 219 | miR-550a-3-5p(1) | 0.000115 | 0.000027 | 3.5 | 1.09E-01 | 1.35E-01 |
| 220 | miR-32(1)        | 0.075472 | 0.022541 | 3.3 | 2.18E-02 | 3.10E-02 |
| 221 | miR-19b(2)       | 3.994187 | 1.201096 | 3.3 | 4.52E-04 | 8.70E-04 |
| 222 | miR-556-3p(1)    | 0.000302 | 0.000097 | 3.3 | 1.79E-01 | 2.14E-01 |
| 223 | miR-653-5p(1)    | 0.001939 | 0.000623 | 3.3 | 4.78E-02 | 6.38E-02 |
| 224 | miR-516a(2)      | 0.012710 | 0.003878 | 3.3 | 2.42E-02 | 3.41E-02 |
| 225 | miR-206(1)       | 0.000507 | 0.000164 | 3.3 | 1.98E-01 | 2.35E-01 |
| 226 | miR-641-5p(1)    | 0.001472 | 0.000446 | 3.3 | 4.34E-02 | 5.86E-02 |
| 227 | miR-527STAR(1)   | 0.000374 | 0.000118 | 3.3 | 2.21E-01 | 2.59E-01 |
| 228 | miR-3691(1)      | 0.000187 | 0.000050 | 3.2 | 1.69E-01 | 2.03E-01 |
| 229 | miR-3074-5p(1)   | 0.000601 | 0.000187 | 3.2 | 1.01E-01 | 1.27E-01 |
| 230 | miR-519a-2-5p(1) | 0.000311 | 0.000121 | 3.2 | 9.15E-02 | 1.17E-01 |
| 231 | miR-1278(1)      | 0.000104 | 0.000028 | 3.1 | 1.70E-01 | 2.04E-01 |
| 232 | miR-548k(1)      | 0.001366 | 0.000437 | 3.1 | 3.96E-03 | 6.43E-03 |
| 233 | miR-2276-3p(1)   | 0.000117 | 0.000031 | 3.0 | 2.16E-01 | 2.54E-01 |
| 234 | miR-95STAR(1)    | 0.000366 | 0.000114 | 3.0 | 1.81E-01 | 2.15E-01 |
| 235 | miR-191STAR(1)   | 0.001056 | 0.000335 | 3.0 | 1.08E-01 | 1.34E-01 |
| 236 | miR-1306-5p(1)   | 0.002217 | 0.000743 | 3.0 | 1.18E-02 | 1.74E-02 |
| 237 | miR-551a(1)      | 0.001235 | 0.000402 | 3.0 | 2.67E-02 | 3.73E-02 |
| 238 | miR-504(1)       | 0.013653 | 0.004625 | 2.9 | 8.00E-03 | 1.21E-02 |
| 239 | miR-3679(1)      | 0.000308 | 0.000105 | 2.9 | 1.01E-01 | 1.27E-01 |
| 240 | miR-5187-5p(1)   | 0.000235 | 0.000081 | 2.8 | 2.47E-01 | 2.86E-01 |

|     | A                | B        | C        | D   | E        | F        |
|-----|------------------|----------|----------|-----|----------|----------|
| 241 | miR-4326(1)      | 0.000863 | 0.000296 | 2.8 | 1.03E-01 | 1.29E-01 |
| 242 | miR-4766(1)      | 0.000215 | 0.000068 | 2.8 | 1.86E-01 | 2.21E-01 |
| 243 | miR-518e-3p(1)   | 0.002363 | 0.000881 | 2.8 | 5.73E-02 | 7.57E-02 |
| 244 | miR-877-5p(1)    | 0.003177 | 0.001109 | 2.8 | 5.37E-03 | 8.36E-03 |
| 245 | miR-34c(1)       | 0.019434 | 0.007019 | 2.8 | 3.68E-02 | 5.05E-02 |
| 246 | miR-484(1)       | 0.057859 | 0.021025 | 2.7 | 2.29E-03 | 3.90E-03 |
| 247 | miR-33bSTAR(1)   | 0.000805 | 0.000303 | 2.7 | 1.07E-01 | 1.34E-01 |
| 248 | miR-31-5p(1)     | 0.002205 | 0.000859 | 2.7 | 4.64E-02 | 6.22E-02 |
| 249 | miR-3117(1)      | 0.000288 | 0.000101 | 2.7 | 1.67E-01 | 2.02E-01 |
| 250 | miR-1307-5p(1)   | 0.127562 | 0.048654 | 2.6 | 9.64E-03 | 1.45E-02 |
| 251 | miR-518a-1-3p(1) | 0.000725 | 0.000337 | 2.6 | 1.68E-01 | 2.03E-01 |
| 252 | miR-518a-2-3p(1) | 0.000725 | 0.000337 | 2.6 | 1.68E-01 | 2.03E-01 |
| 253 | miR-2116(1)      | 0.000269 | 0.000108 | 2.6 | 2.34E-01 | 2.73E-01 |
| 254 | miR-598(1)       | 0.010759 | 0.004197 | 2.6 | 1.41E-02 | 2.05E-02 |
| 255 | miR-184(1)       | 0.000753 | 0.000294 | 2.5 | 1.57E-01 | 1.90E-01 |
| 256 | miR-296-5p(1)    | 0.004656 | 0.001884 | 2.5 | 2.43E-02 | 3.42E-02 |
| 257 | miR-3158STAR(1)  | 0.000183 | 0.000072 | 2.4 | 2.97E-01 | 3.37E-01 |
| 258 | miR-3677-5p(1)   | 0.000095 | 0.000034 | 2.4 | 2.62E-01 | 3.01E-01 |
| 259 | miR-21STAR(1)    | 0.018751 | 0.007978 | 2.3 | 3.63E-02 | 5.00E-02 |
| 260 | miR-374bSTAR(1)  | 0.002807 | 0.001234 | 2.3 | 7.63E-02 | 9.90E-02 |
| 261 | miR-345STAR(1)   | 0.000237 | 0.000094 | 2.3 | 2.61E-01 | 3.01E-01 |
| 262 | miR-34cSTAR(1)   | 0.000404 | 0.000173 | 2.3 | 2.38E-01 | 2.78E-01 |
| 263 | miR-769(1)       | 0.075451 | 0.033268 | 2.3 | 7.08E-03 | 1.08E-02 |
| 264 | miR-671-3p(1)    | 0.001845 | 0.000814 | 2.3 | 1.08E-01 | 1.34E-01 |
| 265 | miR-1287(1)      | 0.004031 | 0.001770 | 2.3 | 4.23E-02 | 5.74E-02 |
| 266 | miR-1228-5p(1)   | 0.000086 | 0.000034 | 2.2 | 3.55E-01 | 3.95E-01 |
| 267 | miR-518a-5p(3)   | 0.004260 | 0.001947 | 2.2 | 1.95E-01 | 2.31E-01 |
| 268 | miR-323bSTAR(1)  | 0.001432 | 0.000648 | 2.2 | 9.44E-02 | 1.20E-01 |
| 269 | miR-361-5p(1)    | 0.095378 | 0.042867 | 2.2 | 5.11E-02 | 6.79E-02 |
| 270 | miR-301a(1)      | 0.054186 | 0.024391 | 2.2 | 4.24E-02 | 5.74E-02 |

|     | A                | B        | C        | D   | E        | F        |
|-----|------------------|----------|----------|-----|----------|----------|
| 271 | miR-1304(1)      | 0.000449 | 0.000189 | 2.2 | 2.84E-01 | 3.24E-01 |
| 272 | miR-1908-5p(1)   | 0.000203 | 0.000082 | 2.2 | 3.15E-01 | 3.56E-01 |
| 273 | miR-597(1)       | 0.000975 | 0.000437 | 2.2 | 2.95E-01 | 3.35E-01 |
| 274 | miR-34bSTAR(1)   | 0.000264 | 0.000138 | 2.2 | 3.20E-01 | 3.61E-01 |
| 275 | miR-550-5p(2)    | 0.001190 | 0.000554 | 2.2 | 5.70E-02 | 7.54E-02 |
| 276 | miR-339-5p(1)    | 0.017720 | 0.008251 | 2.1 | 1.84E-02 | 2.65E-02 |
| 277 | miR-93STAR(1)    | 0.012182 | 0.005906 | 2.1 | 3.86E-02 | 5.26E-02 |
| 278 | miR-340STAR(1)   | 0.002881 | 0.001439 | 2.0 | 3.85E-02 | 5.26E-02 |
| 279 | miR-1283-1-3p(1) | 0.000005 | 0.000000 | 2.0 | 2.35E-01 | 2.74E-01 |
| 280 | miR-374a(1)      | 0.179338 | 0.092976 | 1.9 | 1.50E-01 | 1.83E-01 |
| 281 | miR-676(1)       | 0.000538 | 0.000290 | 1.9 | 3.48E-01 | 3.89E-01 |
| 282 | miR-2277-3p(1)   | 0.000120 | 0.000055 | 1.9 | 3.91E-01 | 4.32E-01 |
| 283 | miR-2116STAR(1)  | 0.000090 | 0.000043 | 1.9 | 4.27E-01 | 4.69E-01 |
| 284 | miR-148aSTAR(1)  | 0.023740 | 0.012806 | 1.9 | 4.82E-02 | 6.42E-02 |
| 285 | miR-365-2STAR(1) | 0.000333 | 0.000187 | 1.8 | 4.21E-01 | 4.63E-01 |
| 286 | miR-185STAR(1)   | 0.001552 | 0.000837 | 1.8 | 2.72E-01 | 3.12E-01 |
| 287 | miR-876-3p(1)    | 0.000770 | 0.000414 | 1.8 | 4.37E-01 | 4.79E-01 |
| 288 | miR-34aSTAR(1)   | 0.000961 | 0.000551 | 1.8 | 2.95E-01 | 3.35E-01 |
| 289 | miR-769STAR(1)   | 0.001979 | 0.001108 | 1.8 | 1.75E-01 | 2.10E-01 |
| 290 | miR-624-5p(1)    | 0.000456 | 0.000254 | 1.7 | 4.94E-01 | 5.32E-01 |
| 291 | miR-345(1)       | 0.027840 | 0.016249 | 1.7 | 4.49E-02 | 6.04E-02 |
| 292 | miR-545-3p(1)    | 0.002281 | 0.001364 | 1.7 | 4.11E-01 | 4.54E-01 |
| 293 | miR-3130-5p(1)   | 0.000277 | 0.000165 | 1.7 | 4.54E-01 | 4.94E-01 |
| 294 | miR-1277-3p(1)   | 0.005615 | 0.003394 | 1.6 | 4.87E-01 | 5.26E-01 |
| 295 | miR-618(1)       | 0.000457 | 0.000297 | 1.6 | 5.28E-01 | 5.68E-01 |
| 296 | miR-887STAR(1)   | 0.000359 | 0.000216 | 1.6 | 4.56E-01 | 4.96E-01 |
| 297 | miR-331STAR(1)   | 0.003917 | 0.002426 | 1.6 | 1.77E-01 | 2.12E-01 |
| 298 | miR-454(1)       | 0.013373 | 0.008294 | 1.6 | 1.80E-01 | 2.14E-01 |
| 299 | miR-32STAR(1)    | 0.002051 | 0.001283 | 1.6 | 3.63E-01 | 4.04E-01 |
| 300 | miR-1227(1)      | 0.000128 | 0.000089 | 1.6 | 5.46E-01 | 5.84E-01 |

|     | A              | B        | C        | D   | E        | F        |
|-----|----------------|----------|----------|-----|----------|----------|
| 301 | miR-3934(1)    | 0.000682 | 0.000439 | 1.6 | 3.38E-01 | 3.79E-01 |
| 302 | miR-3174(1)    | 0.000044 | 0.000023 | 1.5 | 5.87E-01 | 6.24E-01 |
| 303 | miR-3909(1)    | 0.000311 | 0.000212 | 1.5 | 5.53E-01 | 5.91E-01 |
| 304 | miR-548e(1)    | 0.001938 | 0.001281 | 1.5 | 2.24E-01 | 2.63E-01 |
| 305 | miR-489(1)     | 0.000432 | 0.000312 | 1.5 | 5.61E-01 | 5.99E-01 |
| 306 | miR-2355-5p(1) | 0.000479 | 0.000302 | 1.5 | 5.22E-01 | 5.61E-01 |
| 307 | miR-876-5p(1)  | 0.001009 | 0.000670 | 1.5 | 5.77E-01 | 6.15E-01 |
| 308 | miR-550-3p(3)  | 0.001323 | 0.000880 | 1.5 | 4.62E-01 | 5.02E-01 |
| 309 | miR-130a(1)    | 1.019139 | 0.700227 | 1.5 | 2.19E-01 | 2.57E-01 |
| 310 | miR-374aSTAR(  | 0.021228 | 0.014636 | 1.5 | 2.97E-01 | 3.37E-01 |
| 311 | miR-148bSTAR(  | 0.003079 | 0.002163 | 1.4 | 3.27E-01 | 3.67E-01 |
| 312 | miR-138(2)     | 0.009022 | 0.006309 | 1.4 | 2.64E-01 | 3.03E-01 |
| 313 | miR-151-3p(1)  | 0.304970 | 0.216476 | 1.4 | 1.18E-01 | 1.46E-01 |
| 314 | miR-874(1)     | 0.031270 | 0.022289 | 1.4 | 3.43E-01 | 3.84E-01 |
| 315 | miR-1228-3p(1) | 0.000078 | 0.000055 | 1.4 | 6.98E-01 | 7.30E-01 |
| 316 | miR-20aSTAR(1  | 0.009735 | 0.007158 | 1.4 | 4.30E-01 | 4.72E-01 |
| 317 | miR-4804STAR(  | 0.000209 | 0.000156 | 1.3 | 7.14E-01 | 7.43E-01 |
| 318 | miR-21(1)      | 4.969502 | 3.906535 | 1.3 | 3.83E-01 | 4.25E-01 |
| 319 | miR-425STAR(1  | 0.013672 | 0.010742 | 1.3 | 4.74E-01 | 5.14E-01 |
| 320 | miR-129-2-3p(1 | 0.001914 | 0.001497 | 1.3 | 7.12E-01 | 7.42E-01 |
| 321 | miR-204(1)     | 0.013257 | 0.010612 | 1.2 | 5.89E-01 | 6.26E-01 |
| 322 | miR-9STAR(3)   | 0.003555 | 0.002884 | 1.2 | 6.84E-01 | 7.16E-01 |
| 323 | miR-1271(1)    | 0.007862 | 0.006362 | 1.2 | 5.38E-01 | 5.77E-01 |
| 324 | miR-30e(1)     | 0.990653 | 0.816467 | 1.2 | 6.32E-01 | 6.68E-01 |
| 325 | miR-34a(1)     | 0.061136 | 0.050530 | 1.2 | 4.81E-01 | 5.20E-01 |
| 326 | miR-222(1)     | 0.556614 | 0.460232 | 1.2 | 3.87E-01 | 4.28E-01 |
| 327 | miR-486STAR(1  | 0.000625 | 0.000522 | 1.2 | 7.83E-01 | 8.07E-01 |
| 328 | miR-34b(1)     | 0.001150 | 0.000970 | 1.2 | 8.16E-01 | 8.35E-01 |
| 329 | miR-629(1)     | 0.016693 | 0.014654 | 1.1 | 7.23E-01 | 7.50E-01 |
| 330 | miR-939-5p(1)  | 0.000078 | 0.000066 | 1.1 | 8.57E-01 | 8.72E-01 |

|     | A              | B        | C        | D    | E        | F        |
|-----|----------------|----------|----------|------|----------|----------|
| 331 | miR-3157-5p(1) | 0.000143 | 0.000119 | 1.1  | 8.99E-01 | 9.11E-01 |
| 332 | miR-423-3p(1)  | 0.266702 | 0.242042 | 1.1  | 7.42E-01 | 7.68E-01 |
| 333 | miR-5187-3p(1) | 0.000086 | 0.000081 | 1.1  | 9.03E-01 | 9.13E-01 |
| 334 | miR-99bSTAR(1) | 0.007295 | 0.006728 | 1.1  | 7.81E-01 | 8.05E-01 |
| 335 | miR-374b(1)    | 0.075812 | 0.070434 | 1.1  | 8.47E-01 | 8.65E-01 |
| 336 | miR-3158(1)    | 0.000688 | 0.000669 | 1.0  | 9.45E-01 | 9.53E-01 |
| 337 | miR-33a(1)     | 0.037935 | 0.036658 | 1.0  | 9.17E-01 | 9.27E-01 |
| 338 | miR-1193-5p(1) | 0.000000 | 0.000000 | 0.0  | 1.00E+00 | 1.00E+00 |
| 339 | miR-137STAR(1) | 0.000000 | 0.000000 | 0.0  | 1.00E+00 | 1.00E+00 |
| 340 | miR-3120(1)    | 0.000000 | 0.000000 | 0.0  | 1.00E+00 | 1.00E+00 |
| 341 | miR-488(1)     | 0.005595 | 0.005602 | -1.0 | 9.97E-01 | 1.00E+00 |
| 342 | miR-1468(1)    | 0.000496 | 0.000497 | -1.0 | 9.94E-01 | 9.99E-01 |
| 343 | miR-103(2)     | 1.720077 | 1.739549 | -1.0 | 9.75E-01 | 9.81E-01 |
| 344 | miR-491(1)     | 0.002072 | 0.002142 | -1.0 | 9.47E-01 | 9.53E-01 |
| 345 | miR-1292(1)    | 0.000607 | 0.000656 | -1.1 | 9.21E-01 | 9.29E-01 |
| 346 | miR-29b-1STAR  | 0.000209 | 0.000228 | -1.1 | 8.99E-01 | 9.11E-01 |
| 347 | miR-194(2)     | 0.017956 | 0.019662 | -1.1 | 7.93E-01 | 8.16E-01 |
| 348 | miR-508STAR(1) | 0.000129 | 0.000146 | -1.1 | 8.99E-01 | 9.11E-01 |
| 349 | miR-222STAR(1) | 0.001763 | 0.001989 | -1.1 | 8.51E-01 | 8.69E-01 |
| 350 | miR-503(1)     | 0.018703 | 0.021247 | -1.1 | 7.17E-01 | 7.45E-01 |
| 351 | miR-33b(1)     | 0.005386 | 0.006140 | -1.1 | 8.12E-01 | 8.31E-01 |
| 352 | miR-605-3p(1)  | 0.000108 | 0.000131 | -1.1 | 8.54E-01 | 8.70E-01 |
| 353 | miR-501-3p(1)  | 0.006604 | 0.007598 | -1.2 | 6.21E-01 | 6.58E-01 |
| 354 | miR-590-3p(1)  | 0.005462 | 0.006382 | -1.2 | 6.77E-01 | 7.10E-01 |
| 355 | miR-642-5p(1)  | 0.000078 | 0.000107 | -1.2 | 8.58E-01 | 8.72E-01 |
| 356 | miR-3659(1)    | 0.001138 | 0.001347 | -1.2 | 7.64E-01 | 7.89E-01 |
| 357 | miR-625-3p(1)  | 0.002180 | 0.002604 | -1.2 | 6.57E-01 | 6.90E-01 |
| 358 | miR-579-5p(1)  | 0.000103 | 0.000127 | -1.2 | 8.07E-01 | 8.28E-01 |
| 359 | miR-3064-5p(1) | 0.000198 | 0.000247 | -1.2 | 8.04E-01 | 8.26E-01 |
| 360 | miR-103-1STAR  | 0.000101 | 0.000134 | -1.2 | 8.02E-01 | 8.24E-01 |

|     | A              | B        | C        | D    | E        | F        |
|-----|----------------|----------|----------|------|----------|----------|
| 361 | miR-30c(2)     | 0.290759 | 0.359491 | -1.2 | 4.64E-01 | 5.04E-01 |
| 362 | miR-101(2)     | 0.877438 | 1.097522 | -1.3 | 4.46E-01 | 4.88E-01 |
| 363 | miR-16-1STAR(  | 0.002068 | 0.002595 | -1.3 | 6.51E-01 | 6.85E-01 |
| 364 | miR-708STAR(1  | 0.005517 | 0.006943 | -1.3 | 6.19E-01 | 6.56E-01 |
| 365 | miR-425(1)     | 0.079724 | 0.101433 | -1.3 | 3.70E-01 | 4.10E-01 |
| 366 | miR-100STAR(1  | 0.000300 | 0.000374 | -1.3 | 7.57E-01 | 7.83E-01 |
| 367 | miR-191(1)     | 0.391448 | 0.501781 | -1.3 | 2.29E-01 | 2.67E-01 |
| 368 | miR-365-1STAR  | 0.000499 | 0.000652 | -1.3 | 7.05E-01 | 7.35E-01 |
| 369 | miR-548bSTAR(  | 0.000153 | 0.000198 | -1.3 | 7.01E-01 | 7.32E-01 |
| 370 | miR-766(1)     | 0.000912 | 0.001239 | -1.3 | 5.67E-01 | 6.04E-01 |
| 371 | miR-219-5p(2)  | 0.001133 | 0.001526 | -1.3 | 7.20E-01 | 7.47E-01 |
| 372 | miR-155(1)     | 0.006606 | 0.008889 | -1.3 | 3.15E-01 | 3.56E-01 |
| 373 | miR-33aSTAR(1  | 0.002480 | 0.003343 | -1.4 | 4.89E-01 | 5.27E-01 |
| 374 | miR-579-3p(1)  | 0.000089 | 0.000137 | -1.4 | 6.60E-01 | 6.93E-01 |
| 375 | miR-629STAR(1  | 0.000379 | 0.000540 | -1.4 | 6.25E-01 | 6.61E-01 |
| 376 | miR-2110STAR(  | 0.000243 | 0.000354 | -1.4 | 6.35E-01 | 6.69E-01 |
| 377 | miR-1295(1)    | 0.000158 | 0.000231 | -1.4 | 6.52E-01 | 6.86E-01 |
| 378 | miR-628-3p(1)  | 0.000585 | 0.000862 | -1.4 | 5.30E-01 | 5.69E-01 |
| 379 | miR-501-5p(1)  | 0.001585 | 0.002306 | -1.5 | 2.98E-01 | 3.37E-01 |
| 380 | miR-574-5p(1)  | 0.012944 | 0.019050 | -1.5 | 2.10E-01 | 2.48E-01 |
| 381 | miR-659(1)     | 0.000117 | 0.000161 | -1.5 | 5.91E-01 | 6.28E-01 |
| 382 | miR-551b(1)    | 0.001545 | 0.002370 | -1.5 | 4.42E-01 | 4.83E-01 |
| 383 | miR-519a-3p(2) | 0.000861 | 0.001375 | -1.5 | 3.50E-01 | 3.91E-01 |
| 384 | miR-221STAR(1  | 0.009790 | 0.015258 | -1.6 | 1.94E-01 | 2.31E-01 |
| 385 | miR-30c-1STAR  | 0.001991 | 0.003174 | -1.6 | 1.59E-01 | 1.93E-01 |
| 386 | miR-2277-5p(1) | 0.000393 | 0.000623 | -1.6 | 4.81E-01 | 5.20E-01 |
| 387 | miR-486(1)     | 0.027586 | 0.044775 | -1.6 | 1.32E-01 | 1.62E-01 |
| 388 | miR-331(1)     | 0.014667 | 0.025131 | -1.7 | 9.42E-02 | 1.20E-01 |
| 389 | miR-200c(1)    | 0.332052 | 0.587965 | -1.8 | 2.71E-01 | 3.11E-01 |
| 390 | miR-423-5p(1)  | 0.032579 | 0.057746 | -1.8 | 9.11E-02 | 1.17E-01 |



|     | A              | B        | C        | D    | E        | F        |
|-----|----------------|----------|----------|------|----------|----------|
| 391 | miR-200cSTAR(  | 0.000920 | 0.001640 | -1.8 | 2.91E-01 | 3.32E-01 |
| 392 | miR-19b-1STAR  | 0.001811 | 0.003227 | -1.8 | 8.41E-02 | 1.08E-01 |
| 393 | miR-15bSTAR(1  | 0.002700 | 0.004853 | -1.8 | 1.57E-01 | 1.90E-01 |
| 394 | miR-1247STAR(  | 0.000196 | 0.000364 | -1.8 | 4.12E-01 | 4.55E-01 |
| 395 | miR-429(1)     | 0.022266 | 0.040148 | -1.8 | 1.44E-01 | 1.76E-01 |
| 396 | miR-1249(1)    | 0.000315 | 0.000595 | -1.8 | 4.22E-01 | 4.64E-01 |
| 397 | miR-151-5p(1)  | 0.105301 | 0.193463 | -1.8 | 3.60E-02 | 4.96E-02 |
| 398 | miR-30d(1)     | 0.282681 | 0.526805 | -1.9 | 2.73E-02 | 3.81E-02 |
| 399 | miR-16-2STAR(  | 0.003242 | 0.006071 | -1.9 | 1.06E-01 | 1.32E-01 |
| 400 | miR-324-3p(1)  | 0.010550 | 0.020069 | -1.9 | 8.42E-02 | 1.08E-01 |
| 401 | miR-548eSTAR(  | 0.000216 | 0.000428 | -1.9 | 3.68E-01 | 4.09E-01 |
| 402 | miR-628-5p(1)  | 0.000706 | 0.001369 | -1.9 | 2.04E-01 | 2.40E-01 |
| 403 | miR-99b(1)     | 0.118491 | 0.227580 | -1.9 | 1.67E-02 | 2.42E-02 |
| 404 | miR-499(1)     | 0.001532 | 0.002963 | -1.9 | 4.47E-01 | 4.88E-01 |
| 405 | miR-192(1)     | 0.017171 | 0.033213 | -1.9 | 4.34E-02 | 5.86E-02 |
| 406 | miR-652(1)     | 0.025579 | 0.049542 | -1.9 | 3.81E-02 | 5.22E-02 |
| 407 | miR-330(1)     | 0.004823 | 0.009389 | -1.9 | 2.40E-02 | 3.39E-02 |
| 408 | miR-217STAR(1  | 0.000000 | 0.000004 | -1.9 | 2.43E-01 | 2.82E-01 |
| 409 | miR-216aSTAR(  | 0.000000 | 0.000004 | -1.9 | 2.43E-01 | 2.82E-01 |
| 410 | miR-7-1STAR(1  | 0.001382 | 0.002774 | -2.0 | 3.69E-02 | 5.06E-02 |
| 411 | miR-627-5p(1)  | 0.001854 | 0.003777 | -2.0 | 1.36E-01 | 1.67E-01 |
| 412 | miR-140(1)     | 0.158634 | 0.330303 | -2.1 | 4.03E-02 | 5.48E-02 |
| 413 | miR-532-5p(1)  | 0.024194 | 0.050390 | -2.1 | 1.36E-02 | 1.99E-02 |
| 414 | miR-3152STAR(  | 0.000000 | 0.000006 | -2.1 | 2.43E-01 | 2.82E-01 |
| 415 | miR-30bSTAR(1  | 0.000708 | 0.001474 | -2.1 | 2.44E-01 | 2.82E-01 |
| 416 | miR-339-3p(1)  | 0.012090 | 0.025375 | -2.1 | 2.80E-02 | 3.90E-02 |
| 417 | miR-221(1)     | 0.531319 | 1.118186 | -2.1 | 7.56E-03 | 1.15E-02 |
| 418 | miR-4636-5p(1) | 0.000117 | 0.000244 | -2.1 | 3.40E-01 | 3.81E-01 |
| 419 | miR-186(1)     | 0.205624 | 0.435912 | -2.1 | 2.25E-02 | 3.19E-02 |
| 420 | miR-141STAR(1  | 0.001506 | 0.003210 | -2.1 | 1.97E-01 | 2.34E-01 |

|     | A              | B        | C        | D    | E        | F        |
|-----|----------------|----------|----------|------|----------|----------|
| 421 | miR-378STAR(1  | 0.004692 | 0.010110 | -2.2 | 3.46E-02 | 4.78E-02 |
| 422 | miR-15aSTAR(1  | 0.000147 | 0.000329 | -2.2 | 3.32E-01 | 3.73E-01 |
| 423 | miR-509-5p(2)  | 0.000138 | 0.000330 | -2.2 | 3.22E-01 | 3.63E-01 |
| 424 | miR-140STAR(1  | 0.028556 | 0.062430 | -2.2 | 6.80E-02 | 8.88E-02 |
| 425 | miR-624-3p(1)  | 0.000157 | 0.000366 | -2.2 | 2.60E-01 | 3.01E-01 |
| 426 | miR-1296STAR(  | 0.000086 | 0.000205 | -2.3 | 2.75E-01 | 3.15E-01 |
| 427 | miR-15b(1)     | 0.036179 | 0.083943 | -2.3 | 2.12E-02 | 3.01E-02 |
| 428 | miR-28-3p(1)   | 0.057166 | 0.132554 | -2.3 | 4.37E-03 | 6.99E-03 |
| 429 | miR-197(1)     | 0.011403 | 0.026610 | -2.3 | 6.72E-03 | 1.03E-02 |
| 430 | miR-188(1)     | 0.002595 | 0.006137 | -2.4 | 3.11E-02 | 4.31E-02 |
| 431 | miR-29b(2)     | 0.044047 | 0.106145 | -2.4 | 1.32E-02 | 1.93E-02 |
| 432 | miR-2110(1)    | 0.001618 | 0.004034 | -2.5 | 8.84E-03 | 1.33E-02 |
| 433 | miR-1287STAR(  | 0.000246 | 0.000628 | -2.5 | 2.03E-01 | 2.40E-01 |
| 434 | miR-6720-3p(1) | 0.000147 | 0.000348 | -2.5 | 2.70E-01 | 3.10E-01 |
| 435 | miR-107(1)     | 0.042240 | 0.107598 | -2.5 | 3.19E-03 | 5.25E-03 |
| 436 | miR-885(1)     | 0.000161 | 0.000416 | -2.5 | 2.83E-01 | 3.23E-01 |
| 437 | miR-30dSTAR(1  | 0.002347 | 0.006134 | -2.6 | 4.05E-03 | 6.55E-03 |
| 438 | miR-3605-5p(1) | 0.000129 | 0.000344 | -2.6 | 1.56E-01 | 1.90E-01 |
| 439 | miR-4725-3p(1) | 0.000000 | 0.000006 | -2.7 | 9.89E-02 | 1.25E-01 |
| 440 | miR-375(1)     | 0.003273 | 0.008830 | -2.7 | 6.77E-02 | 8.86E-02 |
| 441 | miR-342STAR(1  | 0.000998 | 0.002756 | -2.7 | 7.77E-02 | 1.01E-01 |
| 442 | miR-449c(1)    | 0.000000 | 0.000007 | -2.7 | 9.89E-02 | 1.25E-01 |
| 443 | miR-3919-3p(1) | 0.000000 | 0.000007 | -2.7 | 9.89E-02 | 1.25E-01 |
| 444 | miR-496STAR(1  | 0.000000 | 0.000007 | -2.8 | 9.89E-02 | 1.25E-01 |
| 445 | miR-516STAR(4  | 0.000015 | 0.000057 | -2.8 | 1.23E-01 | 1.51E-01 |
| 446 | miR-200aSTAR(  | 0.000967 | 0.002689 | -2.8 | 8.88E-02 | 1.14E-01 |
| 447 | miR-1323STAR(  | 0.000000 | 0.000007 | -2.8 | 1.79E-01 | 2.14E-01 |
| 448 | miR-361-3p(1)  | 0.005336 | 0.015206 | -2.8 | 4.01E-04 | 7.81E-04 |
| 449 | miR-576-3p(1)  | 0.000938 | 0.002710 | -2.9 | 5.05E-02 | 6.72E-02 |
| 450 | miR-502STAR(1  | 0.000475 | 0.001356 | -2.9 | 6.27E-02 | 8.26E-02 |

|     | A               | B        | C        | D    | E        | F        |
|-----|-----------------|----------|----------|------|----------|----------|
| 451 | miR-134(1)      | 0.007904 | 0.022972 | -2.9 | 3.72E-03 | 6.05E-03 |
| 452 | miR-3605-3p(1)  | 0.000131 | 0.000402 | -2.9 | 1.30E-01 | 1.60E-01 |
| 453 | miR-141(1)      | 0.731961 | 2.157410 | -2.9 | 9.24E-02 | 1.18E-01 |
| 454 | miR-188STAR(1)  | 0.000433 | 0.001280 | -3.0 | 1.56E-01 | 1.89E-01 |
| 455 | miR-576-5p(1)   | 0.000739 | 0.002288 | -3.0 | 1.01E-01 | 1.26E-01 |
| 456 | miR-23aSTAR(1)  | 0.000183 | 0.000540 | -3.1 | 1.39E-01 | 1.70E-01 |
| 457 | miR-660(1)      | 0.012376 | 0.038638 | -3.1 | 2.91E-03 | 4.83E-03 |
| 458 | miR-101-2STAR   | 0.000131 | 0.000439 | -3.3 | 1.23E-01 | 1.51E-01 |
| 459 | miR-378(1)      | 0.381090 | 1.254631 | -3.3 | 1.45E-04 | 3.17E-04 |
| 460 | miR-708(1)      | 0.029760 | 0.101922 | -3.4 | 9.48E-04 | 1.74E-03 |
| 461 | miR-616-5p(1)   | 0.000059 | 0.000179 | -3.4 | 1.27E-01 | 1.56E-01 |
| 462 | miR-148b(1)     | 0.169437 | 0.583764 | -3.4 | 2.06E-04 | 4.31E-04 |
| 463 | miR-590-5p(1)   | 0.001729 | 0.005960 | -3.5 | 4.76E-02 | 6.37E-02 |
| 464 | miR-193bSTAR(1) | 0.001985 | 0.006890 | -3.5 | 3.60E-04 | 7.09E-04 |
| 465 | miR-31-3p(1)    | 0.000091 | 0.000409 | -3.5 | 5.35E-02 | 7.10E-02 |
| 466 | miR-324-5p(1)   | 0.012334 | 0.043546 | -3.5 | 2.22E-03 | 3.78E-03 |
| 467 | miR-887(1)      | 0.004872 | 0.017209 | -3.5 | 3.77E-03 | 6.12E-03 |
| 468 | miR-185(1)      | 0.029987 | 0.106179 | -3.5 | 3.45E-04 | 6.86E-04 |
| 469 | miR-3912(1)     | 0.000153 | 0.000587 | -3.6 | 1.03E-01 | 1.29E-01 |
| 470 | miR-450b(1)     | 0.005455 | 0.019722 | -3.6 | 3.12E-03 | 5.14E-03 |
| 471 | miR-30eSTAR(1)  | 0.055077 | 0.199059 | -3.6 | 4.79E-06 | 1.46E-05 |
| 472 | miR-16(2)       | 0.133514 | 0.485645 | -3.6 | 1.10E-02 | 1.63E-02 |
| 473 | miR-95(1)       | 0.002857 | 0.010486 | -3.7 | 3.58E-03 | 5.86E-03 |
| 474 | miR-29aSTAR(1)  | 0.000566 | 0.002069 | -3.7 | 4.11E-02 | 5.58E-02 |
| 475 | miR-342(1)      | 0.022957 | 0.084378 | -3.7 | 4.25E-06 | 1.32E-05 |
| 476 | miR-3928(1)     | 0.000075 | 0.000280 | -3.7 | 6.50E-02 | 8.51E-02 |
| 477 | miR-125a(1)     | 0.072553 | 0.274388 | -3.8 | 1.01E-04 | 2.31E-04 |
| 478 | miR-625-5p(1)   | 0.000954 | 0.003681 | -3.8 | 5.11E-03 | 8.06E-03 |
| 479 | miR-25STAR(1)   | 0.000104 | 0.000434 | -3.9 | 7.06E-02 | 9.19E-02 |
| 480 | miR-29a(1)      | 0.189582 | 0.747467 | -3.9 | 1.18E-02 | 1.74E-02 |

|     | A               | B        | C        | D    | E        | F        |
|-----|-----------------|----------|----------|------|----------|----------|
| 481 | miR-148a(1)     | 1.559933 | 6.204235 | -4.0 | 4.57E-05 | 1.13E-04 |
| 482 | miR-320(1)      | 0.227942 | 0.935921 | -4.1 | 1.09E-05 | 3.07E-05 |
| 483 | miR-3613(1)     | 0.003612 | 0.015455 | -4.3 | 1.60E-04 | 3.47E-04 |
| 484 | miR-582STAR(1)  | 0.000419 | 0.001879 | -4.3 | 1.38E-02 | 2.01E-02 |
| 485 | miR-584(1)      | 0.000378 | 0.001676 | -4.3 | 1.09E-02 | 1.62E-02 |
| 486 | miR-541-5p(1)   | 0.000000 | 0.000014 | -4.5 | 1.96E-02 | 2.80E-02 |
| 487 | miR-500-5p(2)   | 0.000674 | 0.003151 | -4.7 | 2.17E-03 | 3.70E-03 |
| 488 | miR-146bSTAR(1) | 0.000179 | 0.000851 | -4.7 | 6.44E-02 | 8.44E-02 |
| 489 | miR-412STAR(1)  | 0.000000 | 0.000017 | -4.8 | 1.96E-02 | 2.80E-02 |
| 490 | miR-26a-1STAR   | 0.000138 | 0.000717 | -5.0 | 2.58E-02 | 3.61E-02 |
| 491 | miR-452(1)      | 0.016743 | 0.083638 | -5.0 | 5.56E-07 | 2.19E-06 |
| 492 | miR-335-5p(1)   | 0.028057 | 0.142437 | -5.1 | 6.58E-05 | 1.57E-04 |
| 493 | miR-502(1)      | 0.004223 | 0.021575 | -5.1 | 5.57E-06 | 1.67E-05 |
| 494 | miR-215(1)      | 0.000151 | 0.000782 | -5.1 | 3.17E-02 | 4.38E-02 |
| 495 | miR-193a-5p(1)  | 0.006188 | 0.032347 | -5.2 | 1.23E-05 | 3.43E-05 |
| 496 | miR-195STAR(1)  | 0.000271 | 0.001450 | -5.3 | 1.44E-02 | 2.10E-02 |
| 497 | miR-455-5p(1)   | 0.005109 | 0.027205 | -5.3 | 2.76E-04 | 5.62E-04 |
| 498 | miR-224(1)      | 0.016181 | 0.087400 | -5.4 | 3.10E-05 | 7.94E-05 |
| 499 | miR-218(2)      | 0.020863 | 0.112763 | -5.4 | 8.09E-06 | 2.33E-05 |
| 500 | miR-660STAR(1)  | 0.000122 | 0.000695 | -5.5 | 1.88E-02 | 2.69E-02 |
| 501 | miR-30a(1)      | 0.102698 | 0.577132 | -5.6 | 3.04E-05 | 7.87E-05 |
| 502 | miR-181cSTAR(1) | 0.001121 | 0.006388 | -5.7 | 7.36E-05 | 1.72E-04 |
| 503 | miR-3155-5p(1)  | 0.000000 | 0.000021 | -5.7 | 1.80E-02 | 2.59E-02 |
| 504 | miR-323aSTAR(1) | 0.000000 | 0.000021 | -5.7 | 1.25E-02 | 1.84E-02 |
| 505 | miR-513a-3p(2)  | 0.000124 | 0.000764 | -5.9 | 3.07E-02 | 4.26E-02 |
| 506 | miR-1909(1)     | 0.000000 | 0.000023 | -6.0 | 1.01E-02 | 1.52E-02 |
| 507 | miR-3152(1)     | 0.000000 | 0.000021 | -6.1 | 7.37E-03 | 1.13E-02 |
| 508 | miR-101-1STAR   | 0.002648 | 0.016112 | -6.1 | 1.33E-05 | 3.66E-05 |
| 509 | miR-30c-2STAR   | 0.001090 | 0.006750 | -6.2 | 1.74E-03 | 3.05E-03 |
| 510 | miR-103-2STAR   | 0.000563 | 0.003591 | -6.2 | 1.69E-02 | 2.45E-02 |

|     | A              | B        | C        | D    | E        | F        |
|-----|----------------|----------|----------|------|----------|----------|
| 511 | miR-149(1)     | 0.006948 | 0.043176 | -6.2 | 5.35E-04 | 1.01E-03 |
| 512 | miR-181c(1)    | 0.004710 | 0.031415 | -6.7 | 5.49E-05 | 1.32E-04 |
| 513 | miR-605-5p(1)  | 0.000000 | 0.000026 | -6.8 | 4.26E-03 | 6.85E-03 |
| 514 | miR-532-3p(1)  | 0.003175 | 0.021982 | -6.9 | 1.40E-06 | 4.96E-06 |
| 515 | miR-125aSTAR(  | 0.000647 | 0.004496 | -7.0 | 5.15E-04 | 9.81E-04 |
| 516 | miR-1294STAR(  | 0.000000 | 0.000028 | -7.0 | 9.74E-03 | 1.46E-02 |
| 517 | miR-362-5p(1)  | 0.003788 | 0.026941 | -7.1 | 3.68E-06 | 1.16E-05 |
| 518 | miR-181d(1)    | 0.001390 | 0.010029 | -7.2 | 7.25E-08 | 3.65E-07 |
| 519 | miR-671-5p(1)  | 0.001944 | 0.014035 | -7.2 | 8.80E-04 | 1.62E-03 |
| 520 | miR-450a-2STA  | 0.000172 | 0.001245 | -7.3 | 1.27E-02 | 1.87E-02 |
| 521 | miR-655STAR(1  | 0.000000 | 0.000028 | -7.3 | 5.15E-03 | 8.09E-03 |
| 522 | miR-190a(1)    | 0.005187 | 0.038271 | -7.4 | 5.38E-06 | 1.62E-05 |
| 523 | miR-200b(1)    | 0.057241 | 0.425736 | -7.4 | 2.11E-04 | 4.40E-04 |
| 524 | miR-132(1)     | 0.001058 | 0.007960 | -7.4 | 4.97E-04 | 9.50E-04 |
| 525 | miR-200a(1)    | 0.039351 | 0.305010 | -7.8 | 1.24E-03 | 2.21E-03 |
| 526 | miR-4504(1)    | 0.000000 | 0.000040 | -7.8 | 5.19E-03 | 8.14E-03 |
| 527 | miR-210(1)     | 0.066752 | 0.525164 | -7.9 | 7.05E-06 | 2.05E-05 |
| 528 | miR-137(1)     | 0.000201 | 0.001637 | -7.9 | 4.21E-03 | 6.78E-03 |
| 529 | miR-3934STAR(  | 0.000000 | 0.000033 | -8.0 | 4.66E-03 | 7.42E-03 |
| 530 | miR-636STAR(1  | 0.000000 | 0.000043 | -8.0 | 2.42E-02 | 3.41E-02 |
| 531 | miR-452STAR(1  | 0.001740 | 0.013916 | -8.0 | 2.32E-06 | 7.75E-06 |
| 532 | miR-514aSTAR(  | 0.000305 | 0.002487 | -8.1 | 1.09E-02 | 1.63E-02 |
| 533 | miR-155STAR(1  | 0.000000 | 0.000033 | -8.2 | 4.63E-03 | 7.38E-03 |
| 534 | miR-1185-1-3p( | 0.000179 | 0.001464 | -8.3 | 5.27E-03 | 8.24E-03 |
| 535 | miR-26bSTAR(1  | 0.000398 | 0.003454 | -8.4 | 2.08E-03 | 3.58E-03 |
| 536 | miR-328(1)     | 0.000743 | 0.006316 | -8.4 | 1.98E-05 | 5.34E-05 |
| 537 | miR-1271STAR(  | 0.000019 | 0.000200 | -8.4 | 6.06E-03 | 9.36E-03 |
| 538 | miR-3614-5p(1) | 0.000000 | 0.000036 | -8.6 | 4.74E-03 | 7.52E-03 |
| 539 | miR-3619-5p(1) | 0.000000 | 0.000045 | -8.9 | 1.46E-03 | 2.60E-03 |
| 540 | miR-3612-5p(1) | 0.000000 | 0.000048 | -8.9 | 1.80E-02 | 2.59E-02 |

|     | A               | B        | C        | D     | E        | F        |
|-----|-----------------|----------|----------|-------|----------|----------|
| 541 | miR-30b(1)      | 0.040303 | 0.361902 | -9.0  | 4.99E-07 | 2.02E-06 |
| 542 | miR-5193(1)     | 0.000000 | 0.000047 | -9.0  | 2.02E-03 | 3.49E-03 |
| 543 | miR-4473-5p(1)  | 0.000000 | 0.000036 | -9.0  | 1.91E-03 | 3.32E-03 |
| 544 | miR-410STAR(1)  | 0.000000 | 0.000035 | -9.2  | 1.15E-02 | 1.71E-02 |
| 545 | miR-450a(2)     | 0.003830 | 0.035589 | -9.3  | 1.39E-04 | 3.07E-04 |
| 546 | miR-542STAR(1)  | 0.000534 | 0.005009 | -9.3  | 1.05E-03 | 1.90E-03 |
| 547 | miR-3146(1)     | 0.000000 | 0.000059 | -9.3  | 4.52E-03 | 7.22E-03 |
| 548 | miR-26a(2)      | 0.585838 | 5.510154 | -9.4  | 7.79E-07 | 2.90E-06 |
| 549 | miR-365(2)      | 0.007926 | 0.075080 | -9.5  | 7.29E-05 | 1.72E-04 |
| 550 | miR-570-3p(1)   | 0.000093 | 0.001044 | -9.6  | 4.96E-03 | 7.85E-03 |
| 551 | miR-889STAR(1)  | 0.000000 | 0.000040 | -9.7  | 2.85E-03 | 4.74E-03 |
| 552 | miR-133aSTAR(1) | 0.000526 | 0.005114 | -9.8  | 6.30E-03 | 9.70E-03 |
| 553 | miR-139STAR(1)  | 0.000578 | 0.005757 | -9.9  | 1.98E-04 | 4.17E-04 |
| 554 | miR-28-5p(1)    | 0.013528 | 0.134892 | -10.0 | 3.35E-06 | 1.08E-05 |
| 555 | miR-542(1)      | 0.011762 | 0.117700 | -10.0 | 4.29E-05 | 1.07E-04 |
| 556 | miR-3613STAR(1) | 0.000179 | 0.001825 | -10.1 | 1.82E-03 | 3.16E-03 |
| 557 | miR-15a(1)      | 0.014736 | 0.156179 | -10.6 | 6.02E-06 | 1.80E-05 |
| 558 | miR-23bSTAR(1)  | 0.000269 | 0.002962 | -10.8 | 8.55E-04 | 1.58E-03 |
| 559 | miR-181a-1STA   | 0.001364 | 0.015151 | -11.1 | 1.79E-04 | 3.82E-04 |
| 560 | miR-675-3p(1)   | 0.000304 | 0.003494 | -11.4 | 2.05E-03 | 3.52E-03 |
| 561 | miR-541-3p(1)   | 0.000000 | 0.000046 | -11.6 | 5.39E-04 | 1.02E-03 |
| 562 | miR-22STAR(1)   | 0.000813 | 0.009502 | -11.7 | 2.10E-04 | 4.38E-04 |
| 563 | miR-3657(1)     | 0.000000 | 0.000047 | -11.8 | 1.42E-03 | 2.53E-03 |
| 564 | miR-181b(2)     | 0.007424 | 0.088967 | -12.0 | 1.00E-07 | 4.73E-07 |
| 565 | miR-3145-3p(1)  | 0.000000 | 0.000052 | -12.2 | 1.21E-03 | 2.17E-03 |
| 566 | miR-30aSTAR(1)  | 0.009570 | 0.117600 | -12.3 | 1.30E-09 | 9.95E-09 |
| 567 | miR-147(1)      | 0.000153 | 0.001994 | -12.3 | 3.10E-03 | 5.14E-03 |
| 568 | miR-338-5p(1)   | 0.000751 | 0.009415 | -12.4 | 1.44E-04 | 3.17E-04 |
| 569 | miR-1255a-3p(1) | 0.000000 | 0.000063 | -12.5 | 4.82E-04 | 9.23E-04 |
| 570 | miR-27aSTAR(1)  | 0.002189 | 0.028133 | -12.9 | 5.06E-06 | 1.53E-05 |

|     | A              | B        | C        | D     | E        | F        |
|-----|----------------|----------|----------|-------|----------|----------|
| 571 | miR-218-1STAR  | 0.000307 | 0.004024 | -12.9 | 2.68E-04 | 5.49E-04 |
| 572 | miR-153(2)     | 0.001169 | 0.015426 | -13.1 | 1.67E-04 | 3.60E-04 |
| 573 | miR-3173(1)    | 0.000000 | 0.000074 | -13.2 | 3.42E-03 | 5.61E-03 |
| 574 | miR-584STAR(1  | 0.000000 | 0.000063 | -13.2 | 9.75E-04 | 1.77E-03 |
| 575 | miR-208b(1)    | 0.000000 | 0.000067 | -13.4 | 9.72E-02 | 1.23E-01 |
| 576 | miR-582(1)     | 0.000279 | 0.004051 | -13.5 | 5.40E-04 | 1.02E-03 |
| 577 | miR-153-1STAR  | 0.000000 | 0.000068 | -13.6 | 2.60E-03 | 4.36E-03 |
| 578 | miR-29b-2STAR  | 0.000213 | 0.002771 | -13.7 | 9.86E-04 | 1.79E-03 |
| 579 | miR-27b(1)     | 0.157185 | 2.181145 | -13.9 | 1.88E-11 | 3.39E-10 |
| 580 | miR-147STAR(1  | 0.000000 | 0.000069 | -14.3 | 2.84E-04 | 5.71E-04 |
| 581 | miR-193b(1)    | 0.013376 | 0.191975 | -14.3 | 3.38E-09 | 2.33E-08 |
| 582 | miR-939-3p(1)  | 0.000000 | 0.000063 | -14.7 | 2.02E-03 | 3.49E-03 |
| 583 | miR-616-3p(1)  | 0.000000 | 0.000066 | -15.2 | 1.18E-03 | 2.12E-03 |
| 584 | miR-1245-5p(1) | 0.000000 | 0.000067 | -15.8 | 9.00E-04 | 1.65E-03 |
| 585 | miR-4772-5p(1) | 0.000000 | 0.000077 | -15.8 | 1.08E-04 | 2.44E-04 |
| 586 | miR-3064-3p(1) | 0.000000 | 0.000078 | -16.0 | 7.30E-04 | 1.35E-03 |
| 587 | miR-641-3p(1)  | 0.000000 | 0.000078 | -16.1 | 2.81E-04 | 5.68E-04 |
| 588 | miR-2114STAR(  | 0.000000 | 0.000087 | -16.2 | 9.75E-04 | 1.77E-03 |
| 589 | miR-27bSTAR(1  | 0.001558 | 0.025288 | -16.2 | 6.69E-07 | 2.57E-06 |
| 590 | miR-362-3p(1)  | 0.000623 | 0.010505 | -16.7 | 6.50E-06 | 1.92E-05 |
| 591 | miR-130aSTAR(  | 0.000143 | 0.002516 | -16.8 | 2.46E-04 | 5.07E-04 |
| 592 | miR-597STAR(1  | 0.000000 | 0.000081 | -16.9 | 4.14E-04 | 8.02E-04 |
| 593 | miR-205STAR(1  | 0.000319 | 0.005473 | -17.0 | 1.96E-03 | 3.39E-03 |
| 594 | miR-323a(1)    | 0.000161 | 0.002540 | -17.2 | 2.85E-04 | 5.71E-04 |
| 595 | miR-205(1)     | 0.140921 | 2.430434 | -17.2 | 7.31E-05 | 1.72E-04 |
| 596 | miR-455-3p(1)  | 0.005954 | 0.103256 | -17.4 | 6.95E-09 | 4.44E-08 |
| 597 | miR-487bSTAR(  | 0.000000 | 0.000084 | -17.4 | 3.25E-04 | 6.48E-04 |
| 598 | miR-200bSTAR(  | 0.000235 | 0.004212 | -17.4 | 1.85E-04 | 3.94E-04 |
| 599 | miR-494STAR(1  | 0.000000 | 0.000079 | -17.7 | 4.10E-04 | 7.96E-04 |
| 600 | miR-22(1)      | 0.108081 | 1.986774 | -18.4 | 1.22E-08 | 7.17E-08 |

|     | A              | B        | C        | D     | E        | F        |
|-----|----------------|----------|----------|-------|----------|----------|
| 601 | miR-3200STAR(  | 0.000000 | 0.000083 | -18.5 | 2.38E-04 | 4.92E-04 |
| 602 | miR-4789-3p(1) | 0.000000 | 0.000082 | -18.7 | 1.57E-03 | 2.77E-03 |
| 603 | miR-216b(1)    | 0.000000 | 0.000081 | -18.9 | 8.64E-05 | 2.00E-04 |
| 604 | miR-26b(1)     | 0.065436 | 1.258689 | -19.2 | 3.85E-10 | 3.76E-09 |
| 605 | miR-24-1STAR(  | 0.000533 | 0.010730 | -20.1 | 5.16E-05 | 1.26E-04 |
| 606 | miR-2681(1)    | 0.000000 | 0.000099 | -20.3 | 1.35E-04 | 2.99E-04 |
| 607 | miR-3620-3p(1) | 0.000000 | 0.000097 | -20.5 | 7.14E-04 | 1.32E-03 |
| 608 | miR-181a-2STA  | 0.000872 | 0.018239 | -20.7 | 4.20E-06 | 1.31E-05 |
| 609 | miR-4638-3p(1) | 0.000000 | 0.000110 | -21.3 | 3.20E-04 | 6.38E-04 |
| 610 | miR-615(1)     | 0.000090 | 0.002115 | -21.4 | 1.23E-04 | 2.73E-04 |
| 611 | miR-193a-3p(1) | 0.006397 | 0.137176 | -21.4 | 3.89E-06 | 1.22E-05 |
| 612 | miR-26a-2STAR  | 0.000185 | 0.004187 | -21.6 | 4.96E-05 | 1.22E-04 |
| 613 | miR-652STAR(1  | 0.000216 | 0.004870 | -21.6 | 4.20E-04 | 8.12E-04 |
| 614 | miR-24-2STAR(  | 0.001789 | 0.039122 | -21.7 | 3.67E-07 | 1.54E-06 |
| 615 | miR-4772-3p(1) | 0.000000 | 0.000107 | -22.3 | 6.04E-05 | 1.45E-04 |
| 616 | miR-194-2STAR  | 0.000000 | 0.000115 | -22.7 | 1.67E-04 | 3.60E-04 |
| 617 | miR-3126-5p(1) | 0.000000 | 0.000114 | -22.7 | 7.21E-05 | 1.70E-04 |
| 618 | miR-656STAR(1  | 0.000000 | 0.000104 | -23.1 | 1.44E-04 | 3.16E-04 |
| 619 | miR-770(1)     | 0.000000 | 0.000104 | -23.2 | 1.32E-04 | 2.93E-04 |
| 620 | miR-3690(2)    | 0.000000 | 0.000122 | -23.6 | 7.95E-04 | 1.47E-03 |
| 621 | miR-346(1)     | 0.000000 | 0.000121 | -23.8 | 2.84E-04 | 5.71E-04 |
| 622 | miR-4705(1)    | 0.000000 | 0.000115 | -24.0 | 1.21E-04 | 2.71E-04 |
| 623 | miR-642-3p(1)  | 0.000000 | 0.000130 | -24.6 | 2.12E-03 | 3.63E-03 |
| 624 | miR-27a(1)     | 0.064223 | 1.595913 | -24.8 | 3.04E-12 | 8.11E-11 |
| 625 | miR-139(1)     | 0.001164 | 0.029298 | -25.0 | 9.00E-08 | 4.30E-07 |
| 626 | miR-204STAR(1  | 0.000000 | 0.000115 | -25.0 | 5.35E-04 | 1.01E-03 |
| 627 | miR-1976(1)    | 0.000000 | 0.000133 | -25.1 | 1.07E-04 | 2.41E-04 |
| 628 | miR-497STAR(1  | 0.000124 | 0.003297 | -25.2 | 1.89E-04 | 4.01E-04 |
| 629 | miR-126-5p(1)  | 0.013166 | 0.337820 | -25.7 | 5.00E-10 | 4.52E-09 |
| 630 | miR-3194-3p(1) | 0.000000 | 0.000115 | -25.7 | 1.67E-04 | 3.60E-04 |



|     | A              | B        | C        | D     | E        | F        |
|-----|----------------|----------|----------|-------|----------|----------|
| 631 | miR-665STAR(1  | 0.000000 | 0.000117 | -25.8 | 7.72E-05 | 1.79E-04 |
| 632 | miR-142-3p(1)  | 0.005463 | 0.143444 | -26.2 | 8.16E-10 | 6.90E-09 |
| 633 | miR-500b-3p(1) | 0.000000 | 0.000121 | -26.6 | 3.18E-05 | 8.13E-05 |
| 634 | miR-138-1STAR  | 0.000000 | 0.000135 | -26.7 | 1.03E-04 | 2.34E-04 |
| 635 | miR-3136(1)    | 0.000000 | 0.000135 | -26.8 | 4.46E-05 | 1.11E-04 |
| 636 | miR-4690(1)    | 0.000000 | 0.000130 | -27.3 | 3.38E-05 | 8.54E-05 |
| 637 | miR-126-3p(1)  | 0.044755 | 1.227377 | -27.4 | 6.22E-11 | 8.67E-10 |
| 638 | miR-574-3p(1)  | 0.003165 | 0.087547 | -27.6 | 4.90E-11 | 7.44E-10 |
| 639 | miR-1294(1)    | 0.000000 | 0.000134 | -27.9 | 1.02E-05 | 2.89E-05 |
| 640 | miR-429STAR(1  | 0.000000 | 0.000130 | -28.6 | 3.70E-04 | 7.27E-04 |
| 641 | miR-329STAR(2  | 0.000000 | 0.000139 | -28.9 | 7.13E-06 | 2.07E-05 |
| 642 | miR-1179(1)    | 0.000000 | 0.000134 | -29.4 | 2.65E-05 | 6.94E-05 |
| 643 | miR-1197(1)    | 0.000000 | 0.000141 | -29.8 | 4.60E-06 | 1.41E-05 |
| 644 | miR-3940(1)    | 0.000000 | 0.000143 | -30.5 | 6.28E-04 | 1.17E-03 |
| 645 | miR-122(1)     | 0.000000 | 0.000138 | -30.5 | 3.29E-05 | 8.36E-05 |
| 646 | miR-192STAR(1  | 0.000000 | 0.000145 | -31.6 | 1.63E-04 | 3.54E-04 |
| 647 | miR-224STAR(1  | 0.000179 | 0.005748 | -31.8 | 1.37E-04 | 3.03E-04 |
| 648 | miR-2114(1)    | 0.000000 | 0.000151 | -32.4 | 3.07E-04 | 6.14E-04 |
| 649 | miR-1537(1)    | 0.000000 | 0.000157 | -33.1 | 7.67E-05 | 1.78E-04 |
| 650 | miR-497(1)     | 0.014259 | 0.479853 | -33.6 | 4.38E-12 | 1.06E-10 |
| 651 | miR-510-5p(1)  | 0.000000 | 0.000184 | -35.3 | 2.21E-04 | 4.59E-04 |
| 652 | miR-219-1-3p(1 | 0.000000 | 0.000170 | -35.8 | 6.82E-06 | 2.00E-05 |
| 653 | miR-6720-5p(1) | 0.000000 | 0.000179 | -37.7 | 3.80E-05 | 9.51E-05 |
| 654 | miR-338-3p(1)  | 0.001258 | 0.048033 | -38.1 | 3.44E-08 | 1.81E-07 |
| 655 | miR-146b(1)    | 0.006021 | 0.230151 | -38.2 | 2.86E-10 | 2.97E-09 |
| 656 | miR-668(1)     | 0.000000 | 0.000180 | -38.9 | 2.96E-05 | 7.69E-05 |
| 657 | miR-432STAR(1  | 0.000000 | 0.000187 | -39.0 | 5.39E-05 | 1.31E-04 |
| 658 | miR-218-2STAR  | 0.000000 | 0.000188 | -39.3 | 1.34E-05 | 3.66E-05 |
| 659 | miR-510-3p(1)  | 0.000000 | 0.000193 | -40.8 | 5.78E-04 | 1.08E-03 |
| 660 | miR-424STAR(1  | 0.000482 | 0.020505 | -42.0 | 1.64E-06 | 5.62E-06 |

|     | A                | B        | C        | D     | E        | F        |
|-----|------------------|----------|----------|-------|----------|----------|
| 661 | miR-299-3p(1)    | 0.000154 | 0.005897 | -42.0 | 2.63E-05 | 6.92E-05 |
| 662 | miR-758STAR(1)   | 0.000000 | 0.000215 | -42.1 | 1.52E-06 | 5.30E-06 |
| 663 | miR-24(2)        | 0.144859 | 6.159087 | -42.5 | 1.75E-12 | 5.72E-11 |
| 664 | miR-1185-2-3p(1) | 0.000000 | 0.000206 | -42.7 | 3.10E-05 | 7.94E-05 |
| 665 | miR-450bSTAR(1)  | 0.000000 | 0.000199 | -42.8 | 5.45E-05 | 1.32E-04 |
| 666 | let-7a-2STAR(1)  | 0.000000 | 0.000220 | -43.9 | 1.41E-06 | 4.98E-06 |
| 667 | miR-4636-3p(1)   | 0.000000 | 0.000223 | -45.6 | 6.60E-06 | 1.95E-05 |
| 668 | miR-485-5p(1)    | 0.000104 | 0.005173 | -45.8 | 1.11E-05 | 3.13E-05 |
| 669 | miR-146a(1)      | 0.005685 | 0.260436 | -45.8 | 7.06E-08 | 3.60E-07 |
| 670 | miR-133a(2)      | 0.001166 | 0.055050 | -46.6 | 1.56E-04 | 3.41E-04 |
| 671 | miR-181a(2)      | 0.015288 | 0.714227 | -46.7 | 6.27E-12 | 1.33E-10 |
| 672 | miR-29c(1)       | 0.002339 | 0.110747 | -47.1 | 1.81E-08 | 1.03E-07 |
| 673 | miR-944STAR(1)   | 0.000000 | 0.000227 | -48.6 | 3.59E-04 | 7.09E-04 |
| 674 | miR-216a(1)      | 0.000000 | 0.000261 | -49.3 | 1.61E-05 | 4.38E-05 |
| 675 | miR-514a(3)      | 0.000796 | 0.043465 | -53.5 | 2.42E-05 | 6.44E-05 |
| 676 | miR-211STAR(1)   | 0.000000 | 0.000284 | -56.6 | 4.95E-05 | 1.22E-04 |
| 677 | miR-934(1)       | 0.000000 | 0.000293 | -59.9 | 2.72E-04 | 5.56E-04 |
| 678 | miR-433STAR(1)   | 0.000000 | 0.000288 | -59.9 | 8.22E-06 | 2.36E-05 |
| 679 | miR-134STAR(1)   | 0.000000 | 0.000291 | -60.6 | 3.50E-06 | 1.12E-05 |
| 680 | miR-483-3p(1)    | 0.000095 | 0.005330 | -61.4 | 5.21E-05 | 1.27E-04 |
| 681 | miR-3194-5p(1)   | 0.000000 | 0.000316 | -61.6 | 1.52E-06 | 5.30E-06 |
| 682 | miR-196a(2)      | 0.002097 | 0.128007 | -61.7 | 1.98E-04 | 4.17E-04 |
| 683 | miR-503STAR(1)   | 0.000000 | 0.000302 | -61.8 | 2.72E-07 | 1.18E-06 |
| 684 | miR-142-5p(1)    | 0.002093 | 0.130366 | -62.0 | 3.06E-08 | 1.65E-07 |
| 685 | miR-585STAR(1)   | 0.000000 | 0.000314 | -62.5 | 6.76E-06 | 1.99E-05 |
| 686 | miR-153-2STAR(1) | 0.000000 | 0.000302 | -62.9 | 1.14E-04 | 2.56E-04 |
| 687 | miR-383(1)       | 0.000000 | 0.000330 | -64.6 | 3.93E-06 | 1.23E-05 |
| 688 | miR-125b(2)      | 0.022104 | 1.442813 | -65.3 | 2.56E-14 | 2.18E-12 |
| 689 | miR-495STAR(1)   | 0.000000 | 0.000326 | -66.1 | 1.60E-06 | 5.51E-06 |
| 690 | miR-129-1-3p(1)  | 0.000000 | 0.000325 | -67.3 | 6.22E-06 | 1.85E-05 |

|     | A               | B        | C        | D      | E        | F        |
|-----|-----------------|----------|----------|--------|----------|----------|
| 691 | miR-514b-5p(1)  | 0.000000 | 0.000323 | -67.7  | 2.79E-04 | 5.65E-04 |
| 692 | miR-29cSTAR(1)  | 0.000101 | 0.007987 | -68.6  | 6.82E-07 | 2.61E-06 |
| 693 | miR-570-5p(1)   | 0.000000 | 0.000348 | -69.4  | 3.41E-06 | 1.09E-05 |
| 694 | miR-217(1)      | 0.000000 | 0.000328 | -69.4  | 6.92E-07 | 2.64E-06 |
| 695 | miR-181b-2STA   | 0.000000 | 0.000341 | -69.9  | 6.98E-07 | 2.65E-06 |
| 696 | miR-23b(1)      | 0.015696 | 1.110072 | -70.7  | 5.48E-14 | 3.59E-12 |
| 697 | miR-196b(1)     | 0.001180 | 0.084282 | -72.7  | 8.79E-05 | 2.02E-04 |
| 698 | miR-509-3p(3)   | 0.000200 | 0.016208 | -75.4  | 2.26E-05 | 6.07E-05 |
| 699 | miR-494(1)      | 0.000225 | 0.018462 | -77.9  | 2.49E-06 | 8.25E-06 |
| 700 | miR-511-5p(2)   | 0.000000 | 0.000395 | -79.5  | 2.12E-06 | 7.17E-06 |
| 701 | miR-1255a-5p(1) | 0.000000 | 0.000419 | -80.7  | 5.04E-07 | 2.02E-06 |
| 702 | miR-508(1)      | 0.000167 | 0.013871 | -81.6  | 1.55E-06 | 5.35E-06 |
| 703 | miR-150STAR(1)  | 0.000000 | 0.000427 | -84.1  | 2.20E-06 | 7.42E-06 |
| 704 | miR-543STAR(1)  | 0.000000 | 0.000405 | -84.3  | 8.67E-07 | 3.15E-06 |
| 705 | miR-483-5p(1)   | 0.000113 | 0.010535 | -86.1  | 9.26E-06 | 2.64E-05 |
| 706 | miR-150(1)      | 0.000388 | 0.033068 | -86.3  | 2.30E-07 | 1.01E-06 |
| 707 | miR-499STAR(1)  | 0.000000 | 0.000444 | -91.3  | 2.80E-05 | 7.32E-05 |
| 708 | miR-195(1)      | 0.002896 | 0.280148 | -96.4  | 1.08E-06 | 3.88E-06 |
| 709 | miR-3617(1)     | 0.000000 | 0.000520 | -97.0  | 2.04E-04 | 4.28E-04 |
| 710 | miR-212-5p(1)   | 0.000000 | 0.000483 | -97.6  | 8.26E-09 | 5.09E-08 |
| 711 | miR-380-3p(1)   | 0.000000 | 0.000465 | -98.3  | 3.01E-06 | 9.81E-06 |
| 712 | miR-181b-1STA   | 0.000000 | 0.000489 | -100.2 | 2.72E-08 | 1.48E-07 |
| 713 | miR-380-5p(1)   | 0.000000 | 0.000486 | -101.1 | 2.17E-07 | 9.56E-07 |
| 714 | miR-655(1)      | 0.000093 | 0.011449 | -104.9 | 4.64E-07 | 1.90E-06 |
| 715 | miR-223STAR(1)  | 0.000000 | 0.000518 | -105.0 | 6.25E-08 | 3.20E-07 |
| 716 | miR-544-5p(1)   | 0.000000 | 0.000534 | -107.8 | 2.23E-06 | 7.49E-06 |
| 717 | miR-627-3p(1)   | 0.000000 | 0.000551 | -110.1 | 4.92E-08 | 2.55E-07 |
| 718 | miR-514b-3p(1)  | 0.000000 | 0.000564 | -114.5 | 1.84E-06 | 6.29E-06 |
| 719 | miR-23a(1)      | 0.015081 | 1.752847 | -116.2 | 7.97E-13 | 2.71E-11 |
| 720 | miR-1(2)        | 0.003455 | 0.407418 | -117.7 | 1.75E-07 | 7.95E-07 |

|     | A               | B        | C        | D      | E        | F        |
|-----|-----------------|----------|----------|--------|----------|----------|
| 721 | miR-208a(1)     | 0.000000 | 0.000636 | -121.3 | 1.80E-03 | 3.13E-03 |
| 722 | miR-186STAR(1)  | 0.000006 | 0.001252 | -123.6 | 2.81E-09 | 1.97E-08 |
| 723 | miR-323b(1)     | 0.000000 | 0.000613 | -125.0 | 5.27E-07 | 2.09E-06 |
| 724 | miR-370STAR(1)  | 0.000000 | 0.000643 | -129.7 | 6.60E-09 | 4.28E-08 |
| 725 | miR-424(1)      | 0.014983 | 1.959808 | -130.7 | 2.60E-13 | 1.23E-11 |
| 726 | miR-152(1)      | 0.005260 | 0.706678 | -134.3 | 1.72E-13 | 9.55E-12 |
| 727 | miR-152STAR(1)  | 0.000000 | 0.000680 | -138.7 | 9.27E-08 | 4.40E-07 |
| 728 | miR-496(1)      | 0.000000 | 0.000675 | -140.4 | 1.44E-07 | 6.69E-07 |
| 729 | miR-513b(1)     | 0.000000 | 0.000703 | -143.0 | 3.34E-06 | 1.08E-05 |
| 730 | miR-509-3-5p(1) | 0.000000 | 0.000731 | -145.8 | 4.87E-06 | 1.48E-05 |
| 731 | miR-513c-3p(1)  | 0.000000 | 0.000731 | -147.3 | 6.44E-07 | 2.49E-06 |
| 732 | miR-665(1)      | 0.000078 | 0.011994 | -149.4 | 3.28E-07 | 1.39E-06 |
| 733 | miR-513c-5p(1)  | 0.000000 | 0.000757 | -154.0 | 4.33E-06 | 1.33E-05 |
| 734 | miR-513a-5p(2)  | 0.000000 | 0.000784 | -158.9 | 4.10E-07 | 1.70E-06 |
| 735 | miR-196bSTAR(1) | 0.000000 | 0.000848 | -169.3 | 4.27E-07 | 1.76E-06 |
| 736 | miR-199b-5p(1)  | 0.003236 | 0.555891 | -171.3 | 1.46E-10 | 1.80E-09 |
| 737 | miR-3910(1)     | 0.000000 | 0.000902 | -182.6 | 3.52E-06 | 1.12E-05 |
| 738 | miR-379STAR(1)  | 0.000000 | 0.000902 | -183.8 | 2.59E-07 | 1.13E-06 |
| 739 | let-7a-1STAR(2) | 0.000106 | 0.020190 | -186.7 | 3.02E-08 | 1.63E-07 |
| 740 | miR-212-3p(1)   | 0.000000 | 0.000972 | -194.5 | 1.04E-09 | 8.41E-09 |
| 741 | miR-409-3p(1)   | 0.000213 | 0.039162 | -198.9 | 8.94E-07 | 3.23E-06 |
| 742 | miR-190b(1)     | 0.000000 | 0.001023 | -204.8 | 5.10E-09 | 3.36E-08 |
| 743 | miR-381STAR(1)  | 0.000000 | 0.001014 | -207.0 | 2.58E-06 | 8.51E-06 |
| 744 | miR-487a-5p(1)  | 0.000000 | 0.001042 | -211.5 | 1.40E-06 | 4.96E-06 |
| 745 | miR-146aSTAR(1) | 0.000000 | 0.001073 | -212.1 | 3.43E-07 | 1.45E-06 |
| 746 | let-7a(3)       | 0.025477 | 5.578450 | -219.0 | 2.09E-16 | 5.93E-14 |
| 747 | miR-539STAR(1)  | 0.000000 | 0.001086 | -220.7 | 1.55E-09 | 1.17E-08 |
| 748 | miR-431-3p(1)   | 0.000000 | 0.001099 | -223.9 | 1.17E-09 | 9.19E-09 |
| 749 | miR-485-3p(1)   | 0.000000 | 0.001218 | -244.1 | 1.79E-09 | 1.30E-08 |
| 750 | let-7cSTAR(1)   | 0.000000 | 0.001228 | -245.1 | 2.71E-10 | 2.86E-09 |

|     | A                 | B        | C        | D      | E        | F        |
|-----|-------------------|----------|----------|--------|----------|----------|
| 751 | miR-100(1)        | 0.005509 | 1.357119 | -245.8 | 8.59E-11 | 1.18E-09 |
| 752 | miR-190aSTAR(1)   | 0.000000 | 0.001285 | -257.7 | 1.68E-07 | 7.73E-07 |
| 753 | miR-889(1)        | 0.000000 | 0.001314 | -264.3 | 7.18E-07 | 2.70E-06 |
| 754 | miR-98STAR(1)     | 0.000000 | 0.001342 | -267.8 | 1.76E-10 | 2.02E-09 |
| 755 | miR-412(1)        | 0.000000 | 0.001327 | -268.9 | 7.79E-07 | 2.90E-06 |
| 756 | miR-144STAR(1)    | 0.000147 | 0.043365 | -277.7 | 3.75E-08 | 1.97E-07 |
| 757 | let-7eSTAR(1)     | 0.000000 | 0.001491 | -297.7 | 1.70E-10 | 1.97E-09 |
| 758 | miR-144(1)        | 0.000998 | 0.302408 | -300.9 | 7.53E-08 | 3.70E-07 |
| 759 | miR-145STAR(1)    | 0.000248 | 0.080254 | -305.9 | 1.32E-07 | 6.19E-07 |
| 760 | let-7e(1)         | 0.001126 | 0.354065 | -313.9 | 4.31E-10 | 3.98E-09 |
| 761 | let-7f-2STAR(1)   | 0.000000 | 0.001577 | -315.0 | 4.80E-10 | 4.39E-09 |
| 762 | miR-506(1)        | 0.000000 | 0.001591 | -319.3 | 1.19E-07 | 5.58E-07 |
| 763 | miR-411STAR(1)    | 0.000000 | 0.001595 | -322.2 | 8.48E-06 | 2.43E-05 |
| 764 | miR-133b(1)       | 0.000000 | 0.001663 | -335.7 | 7.65E-05 | 1.78E-04 |
| 765 | miR-210STAR(1)    | 0.000000 | 0.001696 | -338.1 | 6.20E-08 | 3.19E-07 |
| 766 | miR-585(1)        | 0.000000 | 0.001757 | -352.8 | 1.65E-09 | 1.23E-08 |
| 767 | miR-874STAR(1)    | 0.000000 | 0.001778 | -357.7 | 1.25E-08 | 7.21E-08 |
| 768 | let-7gSTAR(1)     | 0.000000 | 0.001791 | -359.6 | 1.25E-08 | 7.21E-08 |
| 769 | miR-10aSTAR(1)    | 0.000000 | 0.002125 | -419.6 | 7.07E-09 | 4.48E-08 |
| 770 | miR-132STAR(1)    | 0.000000 | 0.002129 | -423.0 | 2.42E-10 | 2.67E-09 |
| 771 | miR-450a-1STAR(1) | 0.000000 | 0.002140 | -429.8 | 1.55E-07 | 7.18E-07 |
| 772 | let-7f-1STAR(1)   | 0.000000 | 0.002216 | -441.9 | 1.16E-11 | 2.31E-10 |
| 773 | miR-487a-3p(1)    | 0.000000 | 0.002475 | -497.2 | 4.24E-10 | 3.96E-09 |
| 774 | miR-203STAR(1)    | 0.000142 | 0.084670 | -531.2 | 8.30E-08 | 4.05E-07 |
| 775 | miR-758(1)        | 0.000000 | 0.002915 | -586.4 | 4.67E-11 | 7.37E-10 |
| 776 | miR-10b(1)        | 0.001723 | 1.007341 | -587.3 | 7.40E-09 | 4.63E-08 |
| 777 | miR-337STAR(1)    | 0.000000 | 0.003158 | -634.7 | 7.03E-06 | 2.05E-05 |
| 778 | miR-493-3p(1)     | 0.000009 | 0.009495 | -636.9 | 5.51E-11 | 7.87E-10 |
| 779 | miR-431-5p(1)     | 0.000000 | 0.003195 | -641.4 | 6.31E-13 | 2.30E-11 |
| 780 | miR-376bSTAR(1)   | 0.000000 | 0.003442 | -689.7 | 1.25E-10 | 1.61E-09 |

|     | A              | B        | C         | D       | E        | F        |
|-----|----------------|----------|-----------|---------|----------|----------|
| 781 | miR-369STAR(1  | 0.000000 | 0.003531  | -707.0  | 1.02E-08 | 6.16E-08 |
| 782 | miR-433(1)     | 0.000000 | 0.003524  | -707.0  | 3.72E-09 | 2.55E-08 |
| 783 | miR-376cSTAR(  | 0.000000 | 0.003720  | -745.1  | 4.32E-11 | 7.06E-10 |
| 784 | miR-202(1)     | 0.000000 | 0.003797  | -754.0  | 1.23E-08 | 7.21E-08 |
| 785 | let-7i(1)      | 0.002483 | 1.893000  | -765.3  | 5.04E-14 | 3.57E-12 |
| 786 | miR-376a-2-5p( | 0.000000 | 0.003961  | -793.0  | 1.77E-09 | 1.30E-08 |
| 787 | miR-98(1)      | 0.000154 | 0.112021  | -796.5  | 4.12E-10 | 3.95E-09 |
| 788 | miR-154-3p(1)  | 0.000000 | 0.004008  | -802.1  | 1.04E-11 | 2.16E-10 |
| 789 | miR-656(1)     | 0.000000 | 0.004080  | -817.7  | 7.82E-10 | 6.78E-09 |
| 790 | let-7d(1)      | 0.000642 | 0.535645  | -823.5  | 3.09E-10 | 3.17E-09 |
| 791 | miR-543(1)     | 0.000000 | 0.004375  | -874.9  | 4.13E-10 | 3.95E-09 |
| 792 | miR-675-5p(1)  | 0.000000 | 0.004437  | -888.6  | 1.93E-08 | 1.09E-07 |
| 793 | miR-377(1)     | 0.000100 | 0.097123  | -898.5  | 1.79E-07 | 8.09E-07 |
| 794 | miR-410(1)     | 0.000000 | 0.004641  | -931.2  | 4.38E-09 | 2.96E-08 |
| 795 | miR-1247(1)    | 0.000000 | 0.004746  | -947.5  | 5.09E-09 | 3.36E-08 |
| 796 | miR-329(2)     | 0.000000 | 0.005049  | -1009.5 | 1.63E-11 | 3.02E-10 |
| 797 | miR-377STAR(1  | 0.000000 | 0.005113  | -1022.9 | 4.19E-10 | 3.96E-09 |
| 798 | miR-143(1)     | 0.010558 | 10.807826 | -1023.4 | 3.97E-13 | 1.61E-11 |
| 799 | miR-511-3p(2)  | 0.000000 | 0.005414  | -1074.4 | 5.56E-11 | 7.87E-10 |
| 800 | miR-539(1)     | 0.000000 | 0.005899  | -1174.0 | 3.72E-10 | 3.68E-09 |
| 801 | miR-654STAR(1  | 0.000000 | 0.005910  | -1180.2 | 3.79E-13 | 1.61E-11 |
| 802 | miR-127STAR(1  | 0.000106 | 0.127645  | -1181.9 | 1.69E-09 | 1.25E-08 |
| 803 | miR-944(1)     | 0.000000 | 0.005925  | -1182.6 | 2.55E-09 | 1.81E-08 |
| 804 | miR-199a-3p(3) | 0.003531 | 4.394329  | -1243.4 | 1.81E-15 | 2.57E-13 |
| 805 | miR-143STAR(1  | 0.000143 | 0.179024  | -1246.7 | 2.18E-09 | 1.56E-08 |
| 806 | miR-376a-1-5p( | 0.000000 | 0.006708  | -1340.5 | 4.20E-11 | 6.99E-10 |
| 807 | let-7bSTAR(1)  | 0.000000 | 0.007252  | -1441.9 | 1.47E-11 | 2.78E-10 |
| 808 | let-7f(2)      | 0.004476 | 6.594766  | -1477.6 | 7.25E-15 | 8.80E-13 |
| 809 | miR-154-5p(1)  | 0.000000 | 0.007471  | -1492.9 | 2.14E-09 | 1.54E-08 |
| 810 | let-7g(1)      | 0.001033 | 1.548657  | -1501.2 | 5.99E-12 | 1.33E-10 |

|     | A              | B        | C        | D       | E        | F        |
|-----|----------------|----------|----------|---------|----------|----------|
| 811 | miR-432(1)     | 0.000000 | 0.007788 | -1556.6 | 6.10E-12 | 1.33E-10 |
| 812 | miR-409-5p(1)  | 0.000000 | 0.008299 | -1658.5 | 3.26E-11 | 5.55E-10 |
| 813 | miR-10a(1)     | 0.000086 | 0.169668 | -1665.9 | 1.41E-10 | 1.76E-09 |
| 814 | miR-203(1)     | 0.003648 | 6.199758 | -1693.9 | 2.08E-10 | 2.32E-09 |
| 815 | miR-127(1)     | 0.000158 | 0.312605 | -1848.1 | 9.72E-10 | 8.03E-09 |
| 816 | miR-99aSTAR(1) | 0.000000 | 0.009615 | -1919.4 | 1.40E-09 | 1.07E-08 |
| 817 | miR-1185-5p(2) | 0.000000 | 0.009892 | -1976.1 | 1.30E-10 | 1.65E-09 |
| 818 | miR-382-3p(1)  | 0.000000 | 0.010060 | -2008.3 | 1.59E-10 | 1.91E-09 |
| 819 | miR-370(1)     | 0.000000 | 0.010611 | -2119.2 | 2.62E-10 | 2.82E-09 |
| 820 | miR-196a-2STA  | 0.000000 | 0.010971 | -2190.5 | 7.39E-08 | 3.65E-07 |
| 821 | miR-376a-3p(2) | 0.000000 | 0.011717 | -2336.7 | 5.78E-10 | 5.12E-09 |
| 822 | miR-199a-5p(2) | 0.000314 | 0.718565 | -2376.5 | 3.45E-10 | 3.49E-09 |
| 823 | miR-376a-A6G-  | 0.000066 | 0.140231 | -2384.7 | 3.38E-08 | 1.80E-07 |
| 824 | miR-376c(1)    | 0.000169 | 0.403952 | -2623.5 | 1.02E-10 | 1.35E-09 |
| 825 | miR-493-5p(1)  | 0.000000 | 0.014231 | -2838.9 | 2.72E-10 | 2.86E-09 |
| 826 | let-7c(1)      | 0.000386 | 1.074958 | -2921.2 | 1.54E-10 | 1.88E-09 |
| 827 | let-7b(1)      | 0.000588 | 1.821666 | -3081.6 | 1.81E-10 | 2.05E-09 |
| 828 | let-7iSTAR(1)  | 0.000000 | 0.015868 | -3164.3 | 3.74E-12 | 9.34E-11 |
| 829 | miR-654(1)     | 0.000000 | 0.016450 | -3281.2 | 5.42E-12 | 1.25E-10 |
| 830 | miR-214-5p(1)  | 0.000000 | 0.016689 | -3325.5 | 1.61E-14 | 1.71E-12 |
| 831 | miR-10bSTAR(1) | 0.000000 | 0.016769 | -3340.1 | 1.99E-13 | 9.97E-12 |
| 832 | miR-125b-1STA  | 0.000000 | 0.017534 | -3494.0 | 6.98E-14 | 4.24E-12 |
| 833 | let-7dSTAR(1)  | 0.000000 | 0.017735 | -3532.6 | 2.52E-14 | 2.18E-12 |
| 834 | miR-337(1)     | 0.000000 | 0.018210 | -3631.3 | 1.07E-10 | 1.40E-09 |
| 835 | miR-145(1)     | 0.000722 | 2.768055 | -3818.4 | 3.62E-10 | 3.62E-09 |
| 836 | miR-99a(1)     | 0.000526 | 2.368637 | -4404.5 | 5.02E-14 | 3.57E-12 |
| 837 | miR-382-5p(1)  | 0.000000 | 0.022146 | -4415.3 | 1.62E-10 | 1.91E-09 |
| 838 | miR-299-5p(1)  | 0.000000 | 0.024095 | -4802.2 | 4.77E-11 | 7.37E-10 |
| 839 | miR-495(1)     | 0.000000 | 0.027856 | -5550.7 | 3.05E-12 | 8.11E-11 |
| 840 | miR-487b(1)    | 0.000000 | 0.028308 | -5640.4 | 2.13E-12 | 6.65E-11 |

|     | A             | B        | C        | D        | E        | F        |
|-----|---------------|----------|----------|----------|----------|----------|
| 841 | miR-411(1)    | 0.000000 | 0.032912 | -6557.5  | 1.16E-09 | 9.19E-09 |
| 842 | miR-376b(1)   | 0.000000 | 0.033557 | -6687.0  | 1.00E-10 | 1.35E-09 |
| 843 | miR-211(1)    | 0.000000 | 0.034175 | -6804.6  | 6.48E-13 | 2.30E-11 |
| 844 | miR-136-3p(1) | 0.000000 | 0.034857 | -6945.1  | 1.18E-09 | 9.19E-09 |
| 845 | miR-223(1)    | 0.000000 | 0.035462 | -7063.3  | 2.92E-13 | 1.30E-11 |
| 846 | miR-451(1)    | 0.000276 | 2.033822 | -7245.3  | 2.63E-11 | 4.66E-10 |
| 847 | miR-369(1)    | 0.000000 | 0.038361 | -7641.7  | 1.80E-13 | 9.55E-12 |
| 848 | miR-379(1)    | 0.000000 | 0.044907 | -8946.1  | 2.69E-12 | 7.61E-11 |
| 849 | miR-214-3p(1) | 0.000004 | 0.088555 | -8978.9  | 1.78E-17 | 1.51E-14 |
| 850 | miR-125b-2STA | 0.000000 | 0.048855 | -9728.0  | 5.80E-16 | 1.23E-13 |
| 851 | miR-381(1)    | 0.000000 | 0.052020 | -10361.7 | 2.60E-08 | 1.42E-07 |
| 852 | miR-136-5p(1) | 0.000000 | 0.064905 | -12928.7 | 4.75E-11 | 7.37E-10 |



|    | A           | B                      | C        | D           | E        | F        |
|----|-------------|------------------------|----------|-------------|----------|----------|
| 1  |             | Relative frequency (%) |          |             |          |          |
| 2  | Cistron     | IH                     | NS       | Fold change | P Value  | FDR      |
| 3  | mir-498(46) | 8.887832               | 0.018084 | 492.7       | 3.99E-12 | 1.27E-09 |
| 4  | mir-371(3)  | 0.048568               | 0.000280 | 160.2       | 2.57E-08 | 9.06E-07 |
| 5  | mir-208b(1) | 0.005862               | 0.000048 | 123.8       | 1.33E-03 | 1.01E-02 |
| 6  | mir-1269(1) | 0.001509               | 0.000017 | 114.1       | 2.25E-04 | 1.98E-03 |
| 7  | mir-636(1)  | 0.001319               | 0.000078 | 17.0        | 4.48E-03 | 2.48E-02 |
| 8  | mir-340(1)  | 0.051780               | 0.003127 | 16.5        | 8.39E-04 | 6.65E-03 |
| 9  | mir-133b(2) | 0.016587               | 0.001304 | 12.7        | 6.29E-03 | 3.17E-02 |
| 10 | mir-552(1)  | 0.000274               | 0.000023 | 9.7         | 1.85E-02 | 7.25E-02 |
| 11 | mir-3120(1) | 0.000051               | 0.000000 | 9.0         | 3.65E-03 | 2.14E-02 |
| 12 | mir-642(1)  | 0.001064               | 0.000167 | 6.8         | 2.77E-02 | 9.74E-02 |
| 13 | mir-618(1)  | 0.001220               | 0.000218 | 6.2         | 2.64E-02 | 9.59E-02 |
| 14 | mir-499(1)  | 0.010199               | 0.002417 | 4.3         | 9.44E-02 | 2.36E-01 |
| 15 | mir-195(2)  | 2.311782               | 0.542734 | 4.3         | 3.65E-05 | 4.29E-04 |
| 16 | mir-378(1)  | 3.760415               | 0.899292 | 4.2         | 1.25E-05 | 1.80E-04 |
| 17 | mir-216a(3) | 0.001922               | 0.000477 | 4.1         | 1.85E-04 | 1.67E-03 |
| 18 | mir-605(1)  | 0.000490               | 0.000112 | 4.1         | 5.03E-02 | 1.49E-01 |
| 19 | mir-140(1)  | 1.079422               | 0.278880 | 3.9         | 1.76E-04 | 1.66E-03 |
| 20 | mir-489(2)  | 0.003352               | 0.000921 | 3.9         | 1.43E-03 | 1.03E-02 |
| 21 | mir-676(1)  | 0.000830               | 0.000217 | 3.6         | 6.62E-02 | 1.84E-01 |
| 22 | mir-1179(1) | 0.000372               | 0.000101 | 3.5         | 2.83E-02 | 9.74E-02 |
| 23 | mir-30a(4)  | 5.075092               | 1.472763 | 3.4         | 9.02E-05 | 9.22E-04 |
| 25 | mir-10b(1)  | 2.427585               | 0.724261 | 3.4         | 5.04E-02 | 1.49E-01 |
| 26 | mir-330(1)  | 0.024999               | 0.007474 | 3.3         | 3.89E-05 | 4.40E-04 |
| 28 | mir-766(1)  | 0.002944               | 0.000925 | 3.1         | 2.80E-02 | 9.74E-02 |
| 29 | mir-15a(4)  | 1.575678               | 0.523296 | 3.0         | 7.01E-03 | 3.27E-02 |
| 31 | mir-142(1)  | 0.536212               | 0.194757 | 2.8         | 9.35E-03 | 4.11E-02 |
| 32 | mir-29a(4)  | 1.901693               | 0.698015 | 2.7         | 3.17E-02 | 1.06E-01 |
| 33 | mir-486(1)  | 0.086670               | 0.031911 | 2.7         | 2.22E-03 | 1.44E-02 |

|     | A             | B         | C        | D    | E        | F        |
|-----|---------------|-----------|----------|------|----------|----------|
| 34  | mir-181a-1(4) | 1.570005  | 0.595786 | 2.6  | 7.35E-04 | 5.98E-03 |
| 35  | mir-374a(4)   | 0.340139  | 0.130225 | 2.6  | 5.70E-03 | 2.97E-02 |
| 36  | mir-511-1(2)  | 0.010751  | 0.004168 | 2.6  | 8.96E-03 | 4.00E-02 |
| 37  | mir-4772(1)   | 0.000366  | 0.000131 | 2.5  | 6.33E-02 | 1.79E-01 |
| 39  | mir-1294(1)   | 0.000289  | 0.000115 | 2.5  | 5.88E-02 | 1.73E-01 |
| 41  | mir-202(1)    | 0.006574  | 0.002705 | 2.4  | 6.13E-02 | 1.75E-01 |
| 42  | mir-424(2)    | 3.495371  | 1.437491 | 2.4  | 3.05E-03 | 1.90E-02 |
| 43  | mir-26a-1(2)  | 9.431300  | 3.933767 | 2.4  | 1.94E-02 | 7.49E-02 |
| 44  | mir-22(1)     | 3.401123  | 1.419786 | 2.4  | 1.30E-02 | 5.43E-02 |
| 45  | mir-144(2)    | 3.972393  | 1.679495 | 2.4  | 6.92E-02 | 1.91E-01 |
| 47  | mir-3613(1)   | 0.027634  | 0.012200 | 2.3  | 6.74E-03 | 3.27E-02 |
| 51  | mir-132(2)    | 0.017232  | 0.008202 | 2.1  | 8.95E-02 | 2.27E-01 |
| 54  | mir-339(1)    | 0.045795  | 0.023962 | 1.9  | 1.71E-02 | 6.79E-02 |
| 55  | mir-143(2)    | 18.460959 | 9.717483 | 1.9  | 8.68E-02 | 2.24E-01 |
| 63  | mir-7-1(3)    | 0.038339  | 0.022520 | 1.7  | 3.99E-02 | 1.28E-01 |
| 68  | mir-21(1)     | 4.600902  | 2.758412 | 1.7  | 3.72E-02 | 1.22E-01 |
| 71  | mir-26b(1)    | 1.467306  | 0.901023 | 1.6  | 7.79E-02 | 2.06E-01 |
| 72  | mir-197(1)    | 0.030880  | 0.019043 | 1.6  | 7.27E-02 | 1.96E-01 |
| 76  | mir-126(1)    | 1.724210  | 1.103312 | 1.6  | 8.90E-02 | 2.27E-01 |
| 81  | mir-191(2)    | 0.674788  | 0.437943 | 1.5  | 1.17E-02 | 4.99E-02 |
| 83  | mir-30b(2)    | 0.969767  | 0.640463 | 1.5  | 6.42E-02 | 1.80E-01 |
| 87  | mir-151(1)    | 0.434570  | 0.291741 | 1.5  | 2.65E-02 | 9.59E-02 |
| 94  | mir-25(3)     | 0.988418  | 0.706438 | 1.4  | 8.19E-02 | 2.13E-01 |
| 98  | mir-99b(3)    | 0.851979  | 0.617693 | 1.4  | 9.94E-02 | 2.46E-01 |
| 203 | mir-135a-1(3) | 0.764178  | 1.097216 | -1.4 | 7.29E-02 | 1.96E-01 |
| 215 | mir-17(12)    | 1.144539  | 1.754327 | -1.5 | 4.18E-02 | 1.32E-01 |
| 219 | mir-92b(1)    | 0.002907  | 0.004971 | -1.6 | 4.51E-02 | 1.41E-01 |
| 221 | mir-345(1)    | 0.006960  | 0.011641 | -1.7 | 1.53E-02 | 6.24E-02 |
| 223 | mir-130a(1)   | 0.298740  | 0.501141 | -1.7 | 3.72E-02 | 1.22E-01 |
| 226 | mir-218-1(3)  | 0.049043  | 0.084537 | -1.7 | 2.58E-02 | 9.59E-02 |

|     | A             | B        | C        | D    | E        | F        |
|-----|---------------|----------|----------|------|----------|----------|
| 228 | mir-423(2)    | 0.122116 | 0.213821 | -1.7 | 1.69E-02 | 6.79E-02 |
| 230 | mir-625(1)    | 0.002431 | 0.004499 | -1.8 | 6.13E-02 | 1.75E-01 |
| 232 | mir-199b(1)   | 0.785237 | 1.436779 | -1.8 | 2.66E-02 | 9.59E-02 |
| 240 | mir-708(1)    | 0.038313 | 0.077210 | -2.0 | 6.81E-03 | 3.27E-02 |
| 241 | mir-129-1(2)  | 0.000911 | 0.001637 | -2.0 | 7.44E-02 | 1.98E-01 |
| 242 | mir-548b(1)   | 0.000279 | 0.000522 | -2.1 | 3.92E-02 | 1.27E-01 |
| 243 | mir-574(1)    | 0.034008 | 0.075915 | -2.2 | 1.19E-03 | 9.21E-03 |
| 245 | mir-190a(1)   | 0.012194 | 0.028251 | -2.3 | 8.18E-03 | 3.75E-02 |
| 248 | mir-652(1)    | 0.016332 | 0.038397 | -2.3 | 1.74E-03 | 1.17E-02 |
| 250 | mir-582(1)    | 0.001764 | 0.004212 | -2.4 | 9.28E-02 | 2.34E-01 |
| 252 | mir-324(1)    | 0.018097 | 0.045216 | -2.5 | 5.82E-03 | 2.97E-02 |
| 254 | mir-1180(1)   | 0.000671 | 0.001707 | -2.5 | 3.91E-03 | 2.25E-02 |
| 255 | mir-450a-1(4) | 0.050561 | 0.128143 | -2.5 | 5.75E-03 | 2.97E-02 |
| 256 | mir-629(1)    | 0.004122 | 0.010656 | -2.5 | 5.52E-03 | 2.97E-02 |
| 258 | mir-224(2)    | 0.051852 | 0.134475 | -2.6 | 2.89E-05 | 3.53E-04 |
| 259 | mir-488(1)    | 0.001406 | 0.003959 | -2.6 | 4.97E-02 | 1.49E-01 |
| 262 | mir-1305(1)   | 0.000010 | 0.000046 | -2.7 | 8.16E-02 | 2.13E-01 |
| 263 | mir-592(1)    | 0.000031 | 0.000112 | -2.8 | 6.10E-02 | 1.75E-01 |
| 266 | mir-9-1(3)    | 0.006251 | 0.019518 | -3.2 | 4.26E-03 | 2.41E-02 |
| 268 | mir-651(1)    | 0.000600 | 0.001902 | -3.3 | 1.55E-03 | 1.07E-02 |
| 269 | mir-1307(1)   | 0.012834 | 0.043879 | -3.4 | 2.51E-04 | 2.15E-03 |
| 270 | mir-184(1)    | 0.000048 | 0.000206 | -3.5 | 7.26E-02 | 1.96E-01 |
| 272 | mir-3136(1)   | 0.000022 | 0.000100 | -3.6 | 4.64E-02 | 1.43E-01 |
| 273 | mir-1303(1)   | 0.000036 | 0.000193 | -3.7 | 1.47E-02 | 6.07E-02 |
| 274 | mir-124-1(3)  | 0.000114 | 0.000456 | -3.7 | 3.14E-03 | 1.92E-02 |
| 275 | mir-33b(1)    | 0.001140 | 0.004609 | -3.7 | 6.98E-03 | 3.27E-02 |
| 276 | mir-551a(1)   | 0.000056 | 0.000288 | -3.7 | 1.01E-02 | 4.39E-02 |
| 277 | mir-455(1)    | 0.024259 | 0.092868 | -3.9 | 4.18E-05 | 4.57E-04 |
| 278 | mir-219-1(2)  | 0.000311 | 0.001217 | -4.0 | 2.97E-02 | 1.01E-01 |
| 279 | mir-147(1)    | 0.000357 | 0.001446 | -4.2 | 4.99E-02 | 1.49E-01 |

|     | A             | B        | C        | D     | E        | F        |
|-----|---------------|----------|----------|-------|----------|----------|
| 280 | mir-1277(1)   | 0.000663 | 0.003046 | -4.4  | 8.29E-03 | 3.75E-02 |
| 281 | mir-148a(1)   | 0.992754 | 4.426584 | -4.5  | 1.39E-06 | 2.45E-05 |
| 282 | mir-96(3)     | 0.020593 | 0.098394 | -4.8  | 1.92E-07 | 4.05E-06 |
| 283 | mir-221(2)    | 0.225647 | 1.129882 | -5.0  | 2.08E-09 | 1.65E-07 |
| 284 | mir-770(1)    | 0.000011 | 0.000099 | -5.1  | 2.74E-02 | 9.74E-02 |
| 285 | mir-122(1)    | 0.000018 | 0.000094 | -5.2  | 2.05E-02 | 7.82E-02 |
| 286 | mir-561(1)    | 0.000130 | 0.000379 | -5.5  | 2.31E-03 | 1.46E-02 |
| 287 | mir-1286(1)   | 0.000000 | 0.000028 | -5.8  | 3.18E-02 | 1.06E-01 |
| 288 | mir-885(1)    | 0.000038 | 0.000359 | -6.8  | 4.56E-02 | 1.42E-01 |
| 289 | mir-338(1)    | 0.005602 | 0.041242 | -7.3  | 6.00E-06 | 9.31E-05 |
| 290 | mir-105-1(3)  | 0.000002 | 0.000068 | -7.4  | 1.54E-03 | 1.07E-02 |
| 291 | mir-196b(1)   | 0.008231 | 0.060593 | -7.7  | 1.23E-02 | 5.21E-02 |
| 292 | mir-33a(1)    | 0.003532 | 0.028281 | -7.9  | 6.43E-09 | 4.08E-07 |
| 293 | mir-873(2)    | 0.000295 | 0.002487 | -7.9  | 1.79E-05 | 2.47E-04 |
| 294 | mir-3910(1)   | 0.000067 | 0.000647 | -8.2  | 3.30E-03 | 1.98E-02 |
| 295 | mir-196a-1(3) | 0.008961 | 0.099951 | -11.2 | 6.27E-08 | 1.78E-06 |
| 296 | mir-138-1(2)  | 0.000402 | 0.004580 | -12.7 | 1.08E-08 | 5.69E-07 |
| 297 | mir-3664(1)   | 0.000000 | 0.000057 | -13.5 | 2.43E-02 | 9.16E-02 |
| 298 | mir-210(1)    | 0.025416 | 0.375648 | -14.9 | 1.40E-08 | 6.34E-07 |
| 299 | mir-448(5)    | 0.000000 | 0.000068 | -15.5 | 6.61E-03 | 3.27E-02 |
| 300 | mir-577(1)    | 0.000000 | 0.000074 | -17.0 | 1.41E-03 | 1.03E-02 |
| 301 | mir-6720(1)   | 0.000007 | 0.000376 | -18.3 | 4.54E-03 | 2.48E-02 |
| 302 | mir-187(1)    | 0.000257 | 0.001995 | -18.4 | 5.46E-07 | 1.08E-05 |
| 303 | mir-149(1)    | 0.001415 | 0.030756 | -21.2 | 6.74E-08 | 1.78E-06 |
| 304 | mir-383(1)    | 0.000002 | 0.000241 | -22.1 | 1.78E-04 | 1.66E-03 |
| 305 | mir-3659(1)   | 0.000020 | 0.000955 | -22.7 | 6.70E-05 | 7.08E-04 |
| 306 | mir-4789(1)   | 0.000000 | 0.000097 | -23.3 | 2.14E-03 | 1.42E-02 |
| 307 | mir-375(1)    | 0.000431 | 0.006382 | -33.6 | 3.52E-06 | 5.88E-05 |
| 308 | mir-513b(1)   | 0.000015 | 0.000544 | -39.4 | 1.09E-04 | 1.08E-03 |
| 309 | mir-514b(1)   | 0.000005 | 0.000628 | -39.5 | 1.90E-05 | 2.52E-04 |

|     | A           | B        | C        | D      | E        | F        |
|-----|-------------|----------|----------|--------|----------|----------|
| 310 | mir-944(1)  | 0.000143 | 0.004338 | -40.3  | 5.92E-07 | 1.10E-05 |
| 311 | mir-141(2)  | 0.048698 | 1.946635 | -40.8  | 6.17E-06 | 9.31E-05 |
| 312 | mir-513c(1) | 0.000010 | 0.001057 | -41.3  | 2.16E-05 | 2.74E-04 |
| 313 | mir-506(11) | 0.001285 | 0.057655 | -46.4  | 1.00E-07 | 2.44E-06 |
| 314 | mir-135b(1) | 0.000216 | 0.003102 | -49.9  | 1.21E-09 | 1.28E-07 |
| 315 | mir-934(1)  | 0.000000 | 0.000230 | -51.1  | 3.13E-04 | 2.61E-03 |
| 316 | mir-200a(3) | 0.010407 | 0.552975 | -58.5  | 6.34E-08 | 1.78E-06 |
| 317 | mir-205(1)  | 0.012556 | 1.730184 | -150.3 | 1.14E-07 | 2.59E-06 |
| 318 | mir-203(1)  | 0.026031 | 4.440840 | -176.8 | 2.28E-08 | 9.04E-07 |
| 319 | mir-211(1)  | 0.000184 | 0.024324 | -182.9 | 1.55E-11 | 2.45E-09 |

|    | A           | B                      | C        | D           | E        | F        |
|----|-------------|------------------------|----------|-------------|----------|----------|
| 1  |             | Relative frequency (%) |          |             |          |          |
| 2  | Cistron     | HUVEC                  | NS       | Fold change | P Value  | FDR      |
| 3  | mir-216a(3) | 0.494104               | 0.000477 | 1018.8      | 5.11E-14 | 5.40E-12 |
| 4  | mir-31(1)   | 0.227354               | 0.000903 | 263.0       | 1.59E-10 | 5.05E-09 |
| 5  | mir-137(1)  | 0.078648               | 0.001172 | 66.8        | 3.85E-06 | 2.30E-05 |
| 6  | mir-155(1)  | 0.256853               | 0.006343 | 40.4        | 1.50E-12 | 9.51E-11 |
| 7  | mir-1910(1) | 0.000375               | 0.000008 | 25.9        | 1.88E-03 | 5.63E-03 |
| 8  | mir-3117(1) | 0.001774               | 0.000070 | 23.2        | 2.00E-04 | 7.91E-04 |
| 9  | mir-643(1)  | 0.002428               | 0.000095 | 22.7        | 1.13E-07 | 1.32E-06 |
| 10 | mir-3176(1) | 0.000934               | 0.000050 | 22.4        | 2.55E-07 | 2.45E-06 |
| 11 | mir-3152(1) | 0.000565               | 0.000020 | 21.0        | 8.10E-05 | 3.60E-04 |
| 12 | mir-3938(1) | 0.000157               | 0.000004 | 18.7        | 1.05E-02 | 2.44E-02 |
| 13 | mir-1252(1) | 0.000533               | 0.000023 | 18.4        | 2.39E-04 | 9.23E-04 |
| 14 | mir-340(1)  | 0.055571               | 0.003127 | 17.7        | 9.46E-04 | 3.16E-03 |
| 15 | mir-3192(1) | 0.000113               | 0.000004 | 14.1        | 6.50E-03 | 1.64E-02 |
| 16 | mir-21(1)   | 36.648663              | 2.758412 | 13.3        | 3.60E-10 | 1.04E-08 |
| 17 | mir-3614(1) | 0.000686               | 0.000053 | 12.8        | 7.23E-04 | 2.44E-03 |
| 18 | mir-3120(1) | 0.000056               | 0.000000 | 12.6        | 1.39E-03 | 4.42E-03 |
| 19 | mir-3175(1) | 0.000134               | 0.000008 | 10.9        | 2.00E-02 | 4.39E-02 |
| 20 | mir-7-1(3)  | 0.240527               | 0.022520 | 10.7        | 5.34E-09 | 8.46E-08 |
| 21 | mir-3619(1) | 0.000466               | 0.000045 | 9.7         | 4.88E-04 | 1.74E-03 |
| 22 | mir-5094(1) | 0.000078               | 0.000004 | 9.3         | 5.09E-02 | 9.72E-02 |
| 23 | mir-3194(1) | 0.002846               | 0.000311 | 9.1         | 2.28E-04 | 8.94E-04 |
| 24 | mir-1304(1) | 0.002493               | 0.000306 | 7.9         | 1.88E-05 | 9.32E-05 |
| 25 | mir-2467(1) | 0.000058               | 0.000002 | 7.7         | 4.34E-02 | 8.49E-02 |
| 26 | mir-3200(1) | 0.004042               | 0.000543 | 7.2         | 1.12E-05 | 6.02E-05 |
| 27 | mir-3174(1) | 0.000191               | 0.000021 | 7.2         | 2.29E-02 | 4.94E-02 |
| 28 | mir-3187(1) | 0.000693               | 0.000087 | 7.2         | 3.58E-04 | 1.32E-03 |
| 29 | mir-3657(1) | 0.000342               | 0.000041 | 6.8         | 5.06E-03 | 1.35E-02 |
| 30 | mir-1909(1) | 0.000162               | 0.000019 | 6.7         | 4.02E-02 | 8.07E-02 |

|    | A           | B        | C        | D   | E        | F        |
|----|-------------|----------|----------|-----|----------|----------|
| 31 | mir-126(1)  | 7.269058 | 1.103312 | 6.6 | 4.48E-07 | 3.82E-06 |
| 32 | mir-3138(1) | 0.000178 | 0.000021 | 6.5 | 3.05E-02 | 6.41E-02 |
| 33 | mir-4746(1) | 0.000271 | 0.000037 | 6.2 | 1.13E-02 | 2.60E-02 |
| 34 | mir-582(1)  | 0.025808 | 0.004212 | 6.1 | 4.24E-03 | 1.16E-02 |
| 35 | mir-1251(1) | 0.000026 | 0.000000 | 5.7 | 1.92E-02 | 4.26E-02 |
| 36 | mir-4766(1) | 0.000333 | 0.000053 | 5.6 | 4.16E-02 | 8.24E-02 |
| 37 | mir-3934(1) | 0.001853 | 0.000338 | 5.5 | 1.68E-03 | 5.12E-03 |
| 38 | mir-1266(1) | 0.000137 | 0.000026 | 5.5 | 6.02E-02 | 1.09E-01 |
| 39 | mir-34a(1)  | 0.198525 | 0.036352 | 5.5 | 3.51E-07 | 3.18E-06 |
| 40 | mir-3677(1) | 0.000281 | 0.000050 | 5.5 | 1.10E-02 | 2.53E-02 |
| 41 | mir-130b(2) | 0.163074 | 0.030408 | 5.4 | 4.58E-07 | 3.82E-06 |
| 42 | mir-584(1)  | 0.006589 | 0.001225 | 5.3 | 4.37E-03 | 1.18E-02 |
| 43 | mir-1908(1) | 0.000378 | 0.000064 | 5.0 | 4.99E-02 | 9.58E-02 |
| 44 | mir-1284(1) | 0.000139 | 0.000020 | 5.0 | 5.57E-02 | 1.03E-01 |
| 45 | mir-1276(1) | 0.000081 | 0.000019 | 4.9 | 3.96E-02 | 8.05E-02 |
| 46 | mir-556(1)  | 0.001152 | 0.000235 | 4.9 | 5.40E-02 | 1.01E-01 |
| 47 | mir-589(1)  | 0.002431 | 0.000540 | 4.6 | 3.00E-05 | 1.44E-04 |
| 48 | mir-2355(1) | 0.002731 | 0.000587 | 4.5 | 3.36E-04 | 1.25E-03 |
| 49 | mir-1294(1) | 0.000536 | 0.000115 | 4.5 | 5.76E-03 | 1.49E-02 |
| 50 | mir-3155(1) | 0.000086 | 0.000015 | 4.4 | 4.74E-02 | 9.17E-02 |
| 51 | mir-628(1)  | 0.006761 | 0.001594 | 4.3 | 2.12E-03 | 6.16E-03 |
| 52 | mir-491(1)  | 0.006612 | 0.001570 | 4.2 | 3.48E-03 | 9.85E-03 |
| 53 | mir-498(46) | 0.074012 | 0.018084 | 4.1 | 2.04E-03 | 5.99E-03 |
| 54 | mir-579(1)  | 0.000754 | 0.000188 | 4.1 | 6.38E-02 | 1.13E-01 |
| 55 | mir-2276(1) | 0.000147 | 0.000039 | 4.0 | 1.39E-01 | 2.13E-01 |
| 56 | mir-3177(1) | 0.000199 | 0.000050 | 3.9 | 3.59E-02 | 7.40E-02 |
| 57 | mir-877(1)  | 0.003622 | 0.000949 | 3.8 | 1.76E-04 | 7.07E-04 |
| 58 | mir-301a(2) | 0.086515 | 0.023255 | 3.7 | 2.72E-04 | 1.03E-03 |
| 59 | mir-671(1)  | 0.038246 | 0.010682 | 3.6 | 2.82E-03 | 8.05E-03 |
| 60 | mir-221(2)  | 4.002742 | 1.129882 | 3.5 | 2.97E-06 | 1.88E-05 |

|    | A            | B        | C        | D   | E        | F        |
|----|--------------|----------|----------|-----|----------|----------|
| 61 | mir-1277(1)  | 0.010679 | 0.003046 | 3.5 | 3.54E-02 | 7.34E-02 |
| 62 | mir-3691(1)  | 0.000132 | 0.000035 | 3.3 | 1.81E-01 | 2.69E-01 |
| 63 | mir-374a(4)  | 0.424865 | 0.130225 | 3.3 | 1.99E-03 | 5.89E-03 |
| 64 | mir-3193(1)  | 0.000037 | 0.000007 | 3.3 | 7.94E-02 | 1.32E-01 |
| 65 | mir-1278(1)  | 0.000100 | 0.000026 | 3.2 | 1.70E-01 | 2.56E-01 |
| 66 | mir-3679(1)  | 0.000255 | 0.000077 | 3.2 | 7.04E-02 | 1.22E-01 |
| 67 | mir-449a(3)  | 0.000671 | 0.000220 | 3.2 | 5.25E-02 | 9.91E-02 |
| 68 | mir-3909(1)  | 0.000504 | 0.000162 | 3.2 | 1.35E-01 | 2.09E-01 |
| 69 | mir-3692(1)  | 0.000083 | 0.000021 | 3.2 | 6.33E-02 | 1.13E-01 |
| 70 | mir-29a(4)   | 2.157933 | 0.698015 | 3.1 | 2.52E-02 | 5.40E-02 |
| 71 | mir-361(1)   | 0.119009 | 0.041121 | 2.9 | 5.35E-03 | 1.39E-02 |
| 72 | mir-4709(1)  | 0.000128 | 0.000041 | 2.8 | 8.65E-02 | 1.41E-01 |
| 73 | mir-548(2)   | 0.004124 | 0.001531 | 2.7 | 5.89E-04 | 2.01E-03 |
| 74 | mir-1233(2)  | 0.000060 | 0.000019 | 2.6 | 2.12E-01 | 3.09E-01 |
| 75 | mir-590(1)   | 0.022289 | 0.008843 | 2.5 | 1.65E-02 | 3.70E-02 |
| 76 | mir-3620(1)  | 0.000183 | 0.000072 | 2.4 | 2.77E-01 | 3.85E-01 |
| 77 | mir-1179(1)  | 0.000273 | 0.000101 | 2.4 | 1.31E-01 | 2.07E-01 |
| 78 | mir-4804(1)  | 0.000287 | 0.000117 | 2.4 | 2.66E-01 | 3.74E-01 |
| 79 | mir-3919(1)  | 0.000019 | 0.000005 | 2.3 | 2.87E-01 | 3.97E-01 |
| 80 | mir-208b(1)  | 0.000125 | 0.000048 | 2.3 | 5.25E-01 | 6.28E-01 |
| 81 | mir-151(1)   | 0.663201 | 0.291741 | 2.3 | 1.43E-04 | 5.80E-04 |
| 82 | mir-1303(1)  | 0.000442 | 0.000193 | 2.2 | 8.31E-02 | 1.38E-01 |
| 83 | mir-128-1(2) | 0.036517 | 0.016384 | 2.2 | 7.75E-03 | 1.90E-02 |
| 84 | mir-103-1(2) | 2.719065 | 1.246508 | 2.2 | 5.42E-02 | 1.01E-01 |
| 85 | mir-625(1)   | 0.009737 | 0.004499 | 2.2 | 2.92E-02 | 6.17E-02 |
| 86 | mir-15a(4)   | 1.124539 | 0.523296 | 2.1 | 6.66E-02 | 1.17E-01 |
| 87 | mir-1256(1)  | 0.000123 | 0.000063 | 2.1 | 3.41E-01 | 4.53E-01 |
| 88 | mir-345(1)   | 0.024373 | 0.011641 | 2.1 | 2.49E-03 | 7.18E-03 |
| 89 | mir-551a(1)  | 0.000608 | 0.000288 | 2.0 | 1.41E-01 | 2.16E-01 |
| 90 | mir-2116(1)  | 0.000216 | 0.000107 | 2.0 | 3.35E-01 | 4.47E-01 |



|     | A            | B        | C        | D   | E        | F        |
|-----|--------------|----------|----------|-----|----------|----------|
| 91  | mir-937(2)   | 0.000203 | 0.000094 | 2.0 | 3.75E-01 | 4.88E-01 |
| 92  | mir-766(1)   | 0.001819 | 0.000925 | 2.0 | 2.02E-01 | 2.97E-01 |
| 93  | mir-10a(1)   | 0.232925 | 0.122253 | 1.9 | 2.30E-01 | 3.35E-01 |
| 94  | mir-641(1)   | 0.000727 | 0.000382 | 1.9 | 2.48E-01 | 3.53E-01 |
| 95  | mir-3146(1)  | 0.000068 | 0.000044 | 1.9 | 3.42E-01 | 4.53E-01 |
| 96  | mir-122(1)   | 0.000189 | 0.000094 | 1.9 | 2.90E-01 | 3.98E-01 |
| 97  | mir-624(1)   | 0.000828 | 0.000440 | 1.9 | 4.03E-01 | 5.14E-01 |
| 98  | mir-1180(1)  | 0.003174 | 0.001707 | 1.8 | 6.18E-02 | 1.11E-01 |
| 99  | mir-3145(1)  | 0.000106 | 0.000055 | 1.8 | 4.43E-01 | 5.53E-01 |
| 100 | mir-302a(5)  | 0.000010 | 0.000004 | 1.8 | 4.51E-01 | 5.61E-01 |
| 101 | mir-5092(1)  | 0.000011 | 0.000004 | 1.8 | 5.77E-01 | 6.63E-01 |
| 102 | mir-570(1)   | 0.001774 | 0.000991 | 1.8 | 3.84E-01 | 4.97E-01 |
| 103 | mir-1237(1)  | 0.000083 | 0.000047 | 1.8 | 4.70E-01 | 5.80E-01 |
| 104 | mir-942(1)   | 0.001114 | 0.000634 | 1.8 | 8.68E-02 | 1.41E-01 |
| 105 | mir-30a(4)   | 2.600693 | 1.472763 | 1.8 | 5.49E-02 | 1.02E-01 |
| 106 | mir-937(1)   | 0.000106 | 0.000059 | 1.8 | 5.23E-01 | 6.28E-01 |
| 107 | mir-1226(1)  | 0.000523 | 0.000297 | 1.7 | 2.32E-01 | 3.36E-01 |
| 108 | mir-769(1)   | 0.041683 | 0.024513 | 1.7 | 5.25E-02 | 9.91E-02 |
| 109 | mir-1250(1)  | 0.000085 | 0.000043 | 1.7 | 5.66E-01 | 6.57E-01 |
| 110 | mir-1255a(1) | 0.000559 | 0.000350 | 1.7 | 3.20E-01 | 4.33E-01 |
| 111 | mir-874(1)   | 0.028093 | 0.017094 | 1.6 | 1.44E-01 | 2.19E-01 |
| 112 | mir-193a(5)  | 0.519704 | 0.316366 | 1.6 | 7.49E-02 | 1.28E-01 |
| 113 | mir-5187(1)  | 0.000182 | 0.000115 | 1.6 | 5.57E-01 | 6.56E-01 |
| 114 | mir-17(12)   | 2.830592 | 1.754327 | 1.6 | 4.33E-02 | 8.49E-02 |
| 115 | mir-92b(1)   | 0.008008 | 0.004971 | 1.6 | 7.93E-02 | 1.32E-01 |
| 116 | mir-32(1)    | 0.026905 | 0.016909 | 1.6 | 2.90E-01 | 3.98E-01 |
| 117 | mir-22(1)    | 2.251490 | 1.419786 | 1.6 | 2.00E-01 | 2.96E-01 |
| 118 | mir-3173(1)  | 0.000100 | 0.000072 | 1.5 | 5.69E-01 | 6.58E-01 |
| 119 | mir-659(1)   | 0.000227 | 0.000144 | 1.5 | 5.95E-01 | 6.78E-01 |
| 120 | mir-4638(1)  | 0.000119 | 0.000085 | 1.5 | 5.20E-01 | 6.27E-01 |

|     | A           | B        | C        | D   | E        | F        |
|-----|-------------|----------|----------|-----|----------|----------|
| 121 | mir-1292(1) | 0.000692 | 0.000471 | 1.5 | 4.87E-01 | 5.96E-01 |
| 122 | mir-933(1)  | 0.000037 | 0.000022 | 1.5 | 6.66E-01 | 7.30E-01 |
| 123 | mir-580(1)  | 0.000129 | 0.000091 | 1.5 | 6.05E-01 | 6.83E-01 |
| 124 | mir-4504(1) | 0.000034 | 0.000028 | 1.5 | 5.73E-01 | 6.61E-01 |
| 125 | mir-1227(1) | 0.000087 | 0.000064 | 1.5 | 6.42E-01 | 7.13E-01 |
| 126 | mir-25(3)   | 1.015875 | 0.706438 | 1.4 | 8.58E-02 | 1.41E-01 |
| 127 | mir-186(1)  | 0.446925 | 0.312966 | 1.4 | 2.62E-01 | 3.70E-01 |
| 128 | mir-330(1)  | 0.010456 | 0.007474 | 1.4 | 2.03E-01 | 2.98E-01 |
| 129 | mir-191(2)  | 0.612686 | 0.437943 | 1.4 | 6.51E-02 | 1.15E-01 |
| 130 | mir-616(1)  | 0.000250 | 0.000176 | 1.4 | 6.79E-01 | 7.33E-01 |
| 131 | mir-4326(1) | 0.000299 | 0.000213 | 1.4 | 6.24E-01 | 6.96E-01 |
| 132 | mir-132(2)  | 0.011241 | 0.008202 | 1.4 | 4.95E-01 | 6.03E-01 |
| 133 | mir-484(1)  | 0.020172 | 0.014726 | 1.4 | 2.40E-01 | 3.45E-01 |
| 134 | mir-651(1)  | 0.002552 | 0.001902 | 1.3 | 4.18E-01 | 5.28E-01 |
| 135 | mir-548b(1) | 0.000714 | 0.000522 | 1.3 | 4.16E-01 | 5.27E-01 |
| 136 | mir-2277(1) | 0.000632 | 0.000477 | 1.3 | 6.56E-01 | 7.25E-01 |
| 137 | mir-561(1)  | 0.000515 | 0.000379 | 1.3 | 5.56E-01 | 6.56E-01 |
| 138 | mir-4473(1) | 0.000094 | 0.000070 | 1.3 | 6.43E-01 | 7.13E-01 |
| 139 | mir-107(1)  | 0.099741 | 0.076610 | 1.3 | 3.51E-01 | 4.63E-01 |
| 140 | mir-744(1)  | 0.026456 | 0.020638 | 1.3 | 3.89E-01 | 5.00E-01 |
| 141 | mir-1286(1) | 0.000028 | 0.000028 | 1.3 | 6.71E-01 | 7.30E-01 |
| 142 | mir-1301(1) | 0.002193 | 0.001747 | 1.3 | 5.18E-01 | 6.27E-01 |
| 143 | mir-760(1)  | 0.005511 | 0.004431 | 1.2 | 5.65E-01 | 6.57E-01 |
| 144 | mir-887(1)  | 0.015128 | 0.012395 | 1.2 | 6.09E-01 | 6.85E-01 |
| 145 | mir-1287(1) | 0.002078 | 0.001703 | 1.2 | 5.86E-01 | 6.71E-01 |
| 146 | let-7i(1)   | 1.623909 | 1.353406 | 1.2 | 6.18E-01 | 6.92E-01 |
| 147 | mir-224(2)  | 0.156787 | 0.134475 | 1.2 | 4.87E-01 | 5.96E-01 |
| 148 | mir-181c(2) | 0.038850 | 0.034252 | 1.1 | 6.68E-01 | 7.30E-01 |
| 149 | mir-3158(1) | 0.000567 | 0.000526 | 1.1 | 8.84E-01 | 9.13E-01 |
| 150 | mir-505(1)  | 0.007633 | 0.007002 | 1.1 | 7.66E-01 | 8.09E-01 |

|     | A             | B        | C        | D    | E        | F        |
|-----|---------------|----------|----------|------|----------|----------|
| 151 | mir-339(1)    | 0.025995 | 0.023962 | 1.1  | 7.66E-01 | 8.09E-01 |
| 152 | mir-196b(1)   | 0.065785 | 0.060593 | 1.1  | 9.22E-01 | 9.39E-01 |
| 153 | mir-181a-1(4) | 0.617268 | 0.595786 | 1.0  | 8.97E-01 | 9.23E-01 |
| 154 | mir-448(5)    | 0.000064 | 0.000068 | 1.0  | 9.58E-01 | 9.69E-01 |
| 155 | mir-4731(1)   | 0.000060 | 0.000061 | 1.0  | 9.85E-01 | 9.89E-01 |
| 156 | mir-3942(1)   | 0.000049 | 0.000052 | -1.0 | 9.99E-01 | 9.99E-01 |
| 157 | mir-134(43)   | 0.844435 | 0.849155 | -1.0 | 9.83E-01 | 9.89E-01 |
| 158 | mir-1307(1)   | 0.043151 | 0.043879 | -1.0 | 9.60E-01 | 9.69E-01 |
| 159 | mir-3940(1)   | 0.000105 | 0.000107 | -1.0 | 9.50E-01 | 9.65E-01 |
| 160 | mir-331(1)    | 0.018642 | 0.019641 | -1.1 | 8.50E-01 | 8.84E-01 |
| 161 | mir-3065(1)   | 0.000845 | 0.000901 | -1.1 | 9.17E-01 | 9.38E-01 |
| 162 | mir-4772(1)   | 0.000127 | 0.000131 | -1.1 | 9.13E-01 | 9.36E-01 |
| 163 | mir-550-1(3)  | 0.000935 | 0.001049 | -1.1 | 7.12E-01 | 7.65E-01 |
| 164 | mir-770(1)    | 0.000088 | 0.000099 | -1.1 | 8.51E-01 | 8.84E-01 |
| 165 | mir-148b(1)   | 0.361026 | 0.417506 | -1.2 | 6.03E-01 | 6.83E-01 |
| 166 | mir-598(1)    | 0.002574 | 0.002984 | -1.2 | 6.72E-01 | 7.30E-01 |
| 167 | mir-1229(1)   | 0.000035 | 0.000042 | -1.2 | 8.69E-01 | 9.00E-01 |
| 168 | mir-592(1)    | 0.000092 | 0.000112 | -1.2 | 7.46E-01 | 7.97E-01 |
| 169 | mir-3912(1)   | 0.000366 | 0.000452 | -1.2 | 8.20E-01 | 8.58E-01 |
| 170 | mir-605(1)    | 0.000091 | 0.000112 | -1.2 | 7.85E-01 | 8.23E-01 |
| 171 | mir-33b(1)    | 0.003760 | 0.004609 | -1.2 | 6.80E-01 | 7.33E-01 |
| 172 | mir-629(1)    | 0.008594 | 0.010656 | -1.2 | 5.43E-01 | 6.45E-01 |
| 173 | mir-185(1)    | 0.060582 | 0.075703 | -1.2 | 4.04E-01 | 5.14E-01 |
| 174 | mir-618(1)    | 0.000156 | 0.000218 | -1.3 | 7.83E-01 | 8.23E-01 |
| 175 | mir-99b(3)    | 0.490629 | 0.617693 | -1.3 | 2.75E-01 | 3.84E-01 |
| 176 | mir-370(1)    | 0.006345 | 0.008046 | -1.3 | 5.60E-01 | 6.57E-01 |
| 177 | mir-1306(1)   | 0.000602 | 0.000771 | -1.3 | 5.11E-01 | 6.20E-01 |
| 178 | mir-190b(1)   | 0.000554 | 0.000730 | -1.3 | 5.65E-01 | 6.57E-01 |
| 179 | mir-3944(1)   | 0.000019 | 0.000034 | -1.3 | 7.60E-01 | 8.08E-01 |
| 180 | mir-576(1)    | 0.002626 | 0.003553 | -1.3 | 5.27E-01 | 6.28E-01 |

|     | A             | B        | C         | D    | E        | F        |
|-----|---------------|----------|-----------|------|----------|----------|
| 181 | mir-3613(1)   | 0.009012 | 0.012200  | -1.4 | 3.22E-01 | 4.34E-01 |
| 182 | mir-636(1)    | 0.000049 | 0.000078  | -1.4 | 7.34E-01 | 7.86E-01 |
| 183 | mir-4690(1)   | 0.000066 | 0.000093  | -1.4 | 6.73E-01 | 7.30E-01 |
| 184 | mir-455(1)    | 0.063613 | 0.092868  | -1.5 | 2.42E-01 | 3.45E-01 |
| 185 | mir-23a(6)    | 5.871108 | 9.158310  | -1.6 | 6.90E-02 | 1.20E-01 |
| 186 | mir-3157(1)   | 0.000065 | 0.000105  | -1.6 | 6.06E-01 | 6.83E-01 |
| 187 | mir-33a(1)    | 0.017819 | 0.028281  | -1.6 | 1.12E-01 | 1.80E-01 |
| 188 | mir-1271(1)   | 0.002858 | 0.004676  | -1.6 | 1.36E-01 | 2.10E-01 |
| 189 | mir-197(1)    | 0.011234 | 0.019043  | -1.7 | 7.09E-02 | 1.22E-01 |
| 190 | mir-324(1)    | 0.026403 | 0.045216  | -1.7 | 1.32E-01 | 2.07E-01 |
| 191 | mir-10b(1)    | 0.422642 | 0.724261  | -1.7 | 3.89E-01 | 5.00E-01 |
| 192 | mir-342(1)    | 0.034859 | 0.061925  | -1.8 | 5.27E-03 | 1.38E-02 |
| 193 | mir-423(2)    | 0.119678 | 0.213821  | -1.8 | 2.77E-02 | 5.90E-02 |
| 194 | mir-1296(1)   | 0.000799 | 0.001447  | -1.8 | 1.15E-01 | 1.84E-01 |
| 195 | mir-127(8)    | 0.241254 | 0.437495  | -1.8 | 2.99E-01 | 4.08E-01 |
| 196 | mir-146a(1)   | 0.097744 | 0.185724  | -1.9 | 1.66E-01 | 2.51E-01 |
| 197 | mir-597(1)    | 0.000191 | 0.000361  | -1.9 | 3.75E-01 | 4.88E-01 |
| 198 | mir-1537(1)   | 0.000074 | 0.000132  | -1.9 | 3.32E-01 | 4.46E-01 |
| 199 | mir-3064(1)   | 0.000113 | 0.000233  | -1.9 | 4.28E-01 | 5.36E-01 |
| 200 | mir-3074(1)   | 0.000082 | 0.000164  | -2.0 | 3.64E-01 | 4.77E-01 |
| 201 | mir-3605(1)   | 0.000270 | 0.000534  | -2.0 | 3.07E-01 | 4.18E-01 |
| 202 | mir-2114(1)   | 0.000081 | 0.000174  | -2.0 | 3.54E-01 | 4.66E-01 |
| 203 | mir-218-1(3)  | 0.040805 | 0.084537  | -2.1 | 9.62E-03 | 2.29E-02 |
| 204 | mir-98(13)    | 7.024034 | 14.868133 | -2.1 | 1.17E-03 | 3.76E-03 |
| 205 | mir-5193(2)   | 0.000010 | 0.000033  | -2.2 | 4.55E-01 | 5.64E-01 |
| 206 | mir-135a-1(3) | 0.492732 | 1.097216  | -2.2 | 1.07E-03 | 3.46E-03 |
| 207 | mir-26b(1)    | 0.402843 | 0.901023  | -2.2 | 1.02E-02 | 2.40E-02 |
| 208 | mir-139(1)    | 0.011032 | 0.024784  | -2.2 | 5.93E-03 | 1.52E-02 |
| 209 | mir-140(1)    | 0.117130 | 0.278880  | -2.4 | 1.31E-02 | 2.97E-02 |
| 210 | mir-195(2)    | 0.222968 | 0.542734  | -2.4 | 7.36E-03 | 1.84E-02 |

|     | A             | B        | C        | D    | E        | F        |
|-----|---------------|----------|----------|------|----------|----------|
| 211 | mir-574(1)    | 0.031074 | 0.075915 | -2.4 | 1.56E-03 | 4.90E-03 |
| 212 | mir-188(8)    | 0.055072 | 0.136409 | -2.5 | 2.58E-04 | 9.85E-04 |
| 213 | mir-147(1)    | 0.000569 | 0.001446 | -2.5 | 2.38E-01 | 3.42E-01 |
| 214 | mir-26a-1(2)  | 1.567248 | 3.933767 | -2.5 | 2.21E-02 | 4.80E-02 |
| 215 | mir-130a(1)   | 0.195024 | 0.501141 | -2.6 | 1.58E-03 | 4.90E-03 |
| 216 | mir-450a-1(4) | 0.047362 | 0.128143 | -2.7 | 9.42E-03 | 2.26E-02 |
| 217 | mir-320(1)    | 0.243392 | 0.665174 | -2.7 | 3.94E-04 | 1.44E-03 |
| 218 | mir-371(3)    | 0.000106 | 0.000280 | -2.8 | 1.33E-01 | 2.08E-01 |
| 219 | mir-499(1)    | 0.000880 | 0.002417 | -2.8 | 2.66E-01 | 3.74E-01 |
| 220 | mir-1269(1)   | 0.000000 | 0.000017 | -2.8 | 4.22E-01 | 5.31E-01 |
| 221 | mir-3136(1)   | 0.000030 | 0.000100 | -2.8 | 1.18E-01 | 1.88E-01 |
| 222 | mir-30b(2)    | 0.222767 | 0.640463 | -2.9 | 1.28E-04 | 5.40E-04 |
| 223 | mir-627(1)    | 0.001018 | 0.003079 | -3.0 | 2.18E-02 | 4.76E-02 |
| 224 | mir-3130(1)   | 0.000048 | 0.000160 | -3.0 | 1.73E-01 | 2.59E-01 |
| 225 | mir-652(1)    | 0.012641 | 0.038397 | -3.0 | 5.10E-04 | 1.77E-03 |
| 226 | mir-2110(1)   | 0.001008 | 0.003113 | -3.1 | 1.01E-03 | 3.31E-03 |
| 227 | mir-138-1(2)  | 0.001439 | 0.004580 | -3.1 | 1.59E-03 | 4.91E-03 |
| 228 | mir-424(2)    | 0.445122 | 1.437491 | -3.2 | 4.87E-04 | 1.74E-03 |
| 229 | mir-4789(1)   | 0.000026 | 0.000097 | -3.2 | 1.33E-01 | 2.08E-01 |
| 230 | mir-192(4)    | 0.010677 | 0.038657 | -3.6 | 1.33E-04 | 5.53E-04 |
| 231 | mir-1468(1)   | 0.000092 | 0.000356 | -3.7 | 7.85E-02 | 1.32E-01 |
| 232 | mir-335(1)    | 0.028070 | 0.107719 | -3.8 | 1.39E-04 | 5.71E-04 |
| 233 | mir-676(1)    | 0.000054 | 0.000217 | -4.2 | 8.80E-02 | 1.42E-01 |
| 234 | mir-219-1(2)  | 0.000279 | 0.001217 | -4.3 | 4.10E-02 | 8.18E-02 |
| 235 | mir-28(1)     | 0.043175 | 0.190600 | -4.4 | 1.23E-06 | 8.46E-06 |
| 236 | mir-1249(1)   | 0.000092 | 0.000431 | -4.5 | 7.92E-02 | 1.32E-01 |
| 237 | mir-152(1)    | 0.107055 | 0.499666 | -4.7 | 3.37E-05 | 1.59E-04 |
| 238 | mir-328(1)    | 0.000925 | 0.004495 | -4.8 | 4.94E-04 | 1.74E-03 |
| 239 | mir-3928(1)   | 0.000037 | 0.000209 | -5.0 | 5.65E-02 | 1.03E-01 |
| 240 | mir-577(1)    | 0.000011 | 0.000074 | -5.2 | 3.14E-02 | 6.55E-02 |

|     | A             | B        | C        | D     | E        | F        |
|-----|---------------|----------|----------|-------|----------|----------|
| 241 | mir-296(1)    | 0.000384 | 0.002125 | -5.5  | 6.30E-05 | 2.94E-04 |
| 242 | mir-378(1)    | 0.162400 | 0.899292 | -5.5  | 2.37E-06 | 1.57E-05 |
| 243 | mir-101-1(2)  | 0.126420 | 0.787835 | -6.2  | 1.41E-06 | 9.48E-06 |
| 244 | mir-552(1)    | 0.000000 | 0.000023 | -6.4  | 1.50E-01 | 2.27E-01 |
| 245 | mir-1976(1)   | 0.000011 | 0.000103 | -6.6  | 1.26E-02 | 2.87E-02 |
| 246 | mir-2681(2)   | 0.000018 | 0.000163 | -6.8  | 8.04E-03 | 1.96E-02 |
| 247 | mir-3612(1)   | 0.000000 | 0.000035 | -7.2  | 8.57E-02 | 1.41E-01 |
| 248 | mir-3126(1)   | 0.000010 | 0.000111 | -7.3  | 6.30E-02 | 1.13E-01 |
| 249 | mir-129-1(2)  | 0.000196 | 0.001637 | -8.3  | 8.19E-05 | 3.60E-04 |
| 250 | mir-4802(1)   | 0.000000 | 0.000029 | -8.5  | 7.64E-02 | 1.30E-01 |
| 251 | mir-204(1)    | 0.000702 | 0.007683 | -10.6 | 1.12E-05 | 6.02E-05 |
| 252 | mir-1245(2)   | 0.000017 | 0.000161 | -10.7 | 7.56E-03 | 1.87E-02 |
| 253 | mir-95(1)     | 0.000649 | 0.007546 | -11.4 | 8.26E-06 | 4.59E-05 |
| 254 | mir-1305(1)   | 0.000000 | 0.000046 | -11.8 | 4.39E-03 | 1.18E-02 |
| 255 | mir-133b(2)   | 0.000114 | 0.001304 | -12.5 | 1.87E-02 | 4.17E-02 |
| 256 | mir-149(1)    | 0.002259 | 0.030756 | -13.5 | 1.15E-05 | 6.08E-05 |
| 257 | mir-3664(1)   | 0.000000 | 0.000057 | -13.5 | 4.02E-02 | 8.07E-02 |
| 258 | mir-184(1)    | 0.000010 | 0.000206 | -14.5 | 5.15E-03 | 1.36E-02 |
| 259 | mir-1228(1)   | 0.000000 | 0.000062 | -15.3 | 5.68E-02 | 1.03E-01 |
| 260 | mir-187(1)    | 0.000123 | 0.001995 | -15.9 | 2.87E-06 | 1.86E-05 |
| 261 | mir-934(1)    | 0.000010 | 0.000230 | -15.9 | 3.90E-03 | 1.08E-02 |
| 262 | mir-135b(1)   | 0.000191 | 0.003102 | -16.1 | 3.25E-07 | 3.03E-06 |
| 263 | mir-208a(1)   | 0.000021 | 0.000452 | -17.0 | 3.89E-02 | 7.95E-02 |
| 264 | mir-210(1)    | 0.020637 | 0.375648 | -18.2 | 1.65E-07 | 1.73E-06 |
| 265 | mir-105-1(3)  | 0.000000 | 0.000068 | -18.4 | 5.30E-04 | 1.83E-03 |
| 266 | mir-3690-1(2) | 0.000000 | 0.000088 | -18.6 | 4.49E-02 | 8.73E-02 |
| 267 | mir-346(1)    | 0.000000 | 0.000087 | -18.7 | 4.04E-03 | 1.11E-02 |
| 268 | mir-34b(2)    | 0.000272 | 0.005893 | -20.7 | 1.69E-07 | 1.73E-06 |
| 269 | mir-199a-1(3) | 0.125732 | 2.683622 | -21.3 | 5.15E-10 | 1.26E-08 |
| 270 | mir-551b(1)   | 0.000071 | 0.001660 | -21.9 | 8.45E-05 | 3.67E-04 |

|     | A             | B        | C        | D      | E        | F        |
|-----|---------------|----------|----------|--------|----------|----------|
| 271 | mir-190a(1)   | 0.000933 | 0.028251 | -30.6  | 1.49E-09 | 2.95E-08 |
| 272 | mir-199b(1)   | 0.044643 | 1.436779 | -32.2  | 4.19E-11 | 2.21E-09 |
| 273 | mir-489(2)    | 0.000020 | 0.000921 | -34.7  | 6.59E-07 | 4.98E-06 |
| 274 | mir-642(1)    | 0.000000 | 0.000167 | -35.1  | 1.05E-02 | 2.44E-02 |
| 275 | mir-1295(1)   | 0.000000 | 0.000163 | -36.3  | 8.49E-03 | 2.05E-02 |
| 276 | mir-486(1)    | 0.000855 | 0.031911 | -36.9  | 1.54E-10 | 5.05E-09 |
| 277 | mir-143(2)    | 0.259001 | 9.717483 | -37.5  | 1.12E-08 | 1.68E-07 |
| 278 | mir-9-1(3)    | 0.000496 | 0.019518 | -38.1  | 5.70E-08 | 6.95E-07 |
| 279 | mir-146b(1)   | 0.004070 | 0.165459 | -40.5  | 3.76E-09 | 7.01E-08 |
| 280 | mir-202(1)    | 0.000060 | 0.002705 | -40.6  | 4.33E-06 | 2.49E-05 |
| 281 | mir-504(1)    | 0.000082 | 0.003331 | -41.1  | 1.17E-08 | 1.68E-07 |
| 282 | mir-1270-1(1) | 0.000000 | 0.000218 | -46.8  | 3.21E-06 | 1.96E-05 |
| 283 | mir-1270-2(1) | 0.000000 | 0.000218 | -46.8  | 3.21E-06 | 1.96E-05 |
| 284 | mir-383(1)    | 0.000000 | 0.000241 | -51.4  | 1.19E-04 | 5.10E-04 |
| 285 | mir-338(1)    | 0.000751 | 0.041242 | -55.0  | 4.90E-09 | 8.17E-08 |
| 286 | mir-196a-1(3) | 0.001803 | 0.099951 | -55.4  | 7.23E-10 | 1.64E-08 |
| 287 | mir-153-1(2)  | 0.000186 | 0.011377 | -62.7  | 9.35E-07 | 6.74E-06 |
| 288 | mir-144(2)    | 0.026593 | 1.679495 | -63.2  | 1.59E-07 | 1.73E-06 |
| 289 | mir-148a(1)   | 0.062385 | 4.426584 | -71.0  | 3.79E-13 | 3.01E-11 |
| 290 | mir-873(2)    | 0.000028 | 0.002487 | -71.7  | 5.15E-08 | 6.53E-07 |
| 291 | mir-4636(1)   | 0.000000 | 0.000336 | -74.1  | 9.87E-04 | 3.26E-03 |
| 292 | mir-885(1)    | 0.000000 | 0.000359 | -74.9  | 3.67E-03 | 1.03E-02 |
| 293 | mir-150(1)    | 0.000318 | 0.023777 | -74.9  | 5.38E-07 | 4.28E-06 |
| 294 | mir-3617(1)   | 0.000000 | 0.000373 | -75.6  | 6.14E-03 | 1.56E-02 |
| 295 | mir-142(1)    | 0.002465 | 0.194757 | -79.2  | 4.72E-10 | 1.25E-08 |
| 296 | mir-6720(1)   | 0.000000 | 0.000376 | -83.4  | 1.84E-03 | 5.56E-03 |
| 297 | mir-124-1(3)  | 0.000000 | 0.000456 | -97.4  | 9.86E-07 | 6.95E-06 |
| 298 | mir-96(3)     | 0.000911 | 0.098394 | -107.0 | 1.59E-14 | 2.53E-12 |
| 299 | mir-488(1)    | 0.000033 | 0.003959 | -110.3 | 6.30E-07 | 4.87E-06 |
| 300 | mir-513b(1)   | 0.000000 | 0.000544 | -119.9 | 6.56E-05 | 3.01E-04 |

|     | A            | B        | C        | D       | E        | F        |
|-----|--------------|----------|----------|---------|----------|----------|
| 301 | mir-223(1)   | 0.000219 | 0.025329 | -121.8  | 8.61E-11 | 3.47E-09 |
| 302 | mir-944(1)   | 0.000024 | 0.004338 | -130.0  | 4.22E-07 | 3.72E-06 |
| 303 | mir-514b(1)  | 0.000000 | 0.000628 | -137.8  | 1.46E-05 | 7.34E-05 |
| 304 | mir-3910(1)  | 0.000000 | 0.000647 | -142.1  | 6.83E-05 | 3.09E-04 |
| 305 | mir-1247(1)  | 0.000020 | 0.003620 | -142.5  | 4.29E-06 | 2.49E-05 |
| 306 | mir-675(1)   | 0.000050 | 0.005753 | -145.7  | 2.97E-05 | 1.44E-04 |
| 307 | mir-375(1)   | 0.000034 | 0.006382 | -145.8  | 5.40E-07 | 4.28E-06 |
| 308 | mir-1-1(4)   | 0.002136 | 0.329325 | -156.1  | 1.45E-07 | 1.65E-06 |
| 309 | mir-3659(1)  | 0.000000 | 0.000955 | -207.0  | 1.25E-05 | 6.43E-05 |
| 310 | mir-513c(1)  | 0.000000 | 0.001057 | -230.2  | 1.26E-05 | 6.43E-05 |
| 311 | mir-483(1)   | 0.000057 | 0.011713 | -239.4  | 7.42E-06 | 4.20E-05 |
| 312 | mir-200a(3)  | 0.002140 | 0.552975 | -259.1  | 4.51E-08 | 6.10E-07 |
| 313 | mir-511-1(2) | 0.000011 | 0.004168 | -274.4  | 9.69E-10 | 2.05E-08 |
| 314 | mir-141(2)   | 0.004950 | 1.946635 | -391.9  | 8.00E-07 | 5.90E-06 |
| 315 | mir-708(1)   | 0.000197 | 0.077210 | -402.5  | 1.18E-15 | 3.73E-13 |
| 316 | mir-211(1)   | 0.000050 | 0.024324 | -437.9  | 8.77E-11 | 3.47E-09 |
| 317 | mir-205(1)   | 0.002543 | 1.730184 | -683.6  | 2.07E-07 | 2.05E-06 |
| 318 | mir-203(1)   | 0.005173 | 4.440840 | -861.4  | 4.62E-08 | 6.10E-07 |
| 319 | mir-506(11)  | 0.000054 | 0.057655 | -1181.4 | 4.19E-09 | 7.38E-08 |



|    | A              | B                      | C         | D                  | E              | F          |
|----|----------------|------------------------|-----------|--------------------|----------------|------------|
| 1  |                | Relative frequency (%) |           |                    |                |            |
| 2  | <b>Cistron</b> | <b>HemSC</b>           | <b>NS</b> | <b>Fold change</b> | <b>P Value</b> | <b>FDR</b> |
| 3  | mir-511-1(2)   | 0.000000               | 0.004168  | -896.1             | 1.54E-07       | 2.86E-06   |
| 4  | mir-506(11)    | 0.000148               | 0.057655  | -396.1             | 2.17E-06       | 2.86E-05   |
| 5  | mir-196b(1)    | 0.000182               | 0.060593  | -336.6             | 8.46E-04       | 3.44E-03   |
| 6  | mir-205(1)     | 0.006109               | 1.730184  | -283.1             | 3.54E-05       | 2.80E-04   |
| 7  | mir-203(1)     | 0.015852               | 4.440840  | -279.9             | 1.55E-05       | 1.41E-04   |
| 8  | mir-513c(1)    | 0.000000               | 0.001057  | -230.2             | 5.94E-04       | 2.61E-03   |
| 9  | mir-200a(3)    | 0.002438               | 0.552975  | -227.2             | 3.69E-06       | 3.90E-05   |
| 10 | mir-3659(1)    | 0.000000               | 0.000955  | -207.0             | 8.18E-04       | 3.37E-03   |
| 11 | mir-148a(1)    | 0.024288               | 4.426584  | -182.3             | 4.58E-12       | 3.70E-10   |
| 12 | mir-141(2)     | 0.010816               | 1.946635  | -179.9             | 9.46E-05       | 5.88E-04   |
| 13 | mir-375(1)     | 0.000032               | 0.006382  | -165.2             | 4.69E-05       | 3.23E-04   |
| 14 | mir-483(1)     | 0.000078               | 0.011713  | -156.3             | 4.25E-04       | 2.01E-03   |
| 15 | mir-3910(1)    | 0.000000               | 0.000647  | -142.1             | 2.29E-03       | 8.10E-03   |
| 16 | mir-514b(1)    | 0.000000               | 0.000628  | -137.8             | 7.56E-04       | 3.20E-03   |
| 17 | mir-513b(1)    | 0.000000               | 0.000544  | -119.9             | 2.32E-03       | 8.10E-03   |
| 18 | mir-211(1)     | 0.000202               | 0.024324  | -116.5             | 1.39E-07       | 2.75E-06   |
| 19 | mir-944(1)     | 0.000033               | 0.004338  | -112.5             | 4.11E-05       | 2.96E-04   |
| 20 | mir-488(1)     | 0.000032               | 0.003959  | -102.9             | 6.83E-05       | 4.42E-04   |
| 21 | mir-1247(1)    | 0.000032               | 0.003620  | -94.3              | 3.85E-04       | 1.85E-03   |
| 22 | mir-208a(1)    | 0.000000               | 0.000452  | -93.7              | 6.59E-02       | 1.41E-01   |
| 23 | mir-150(1)     | 0.000258               | 0.023777  | -87.6              | 2.20E-05       | 1.83E-04   |
| 24 | mir-675(1)     | 0.000072               | 0.005753  | -78.1              | 1.44E-03       | 5.50E-03   |
| 25 | mir-885(1)     | 0.000000               | 0.000359  | -74.9              | 3.83E-02       | 9.13E-02   |
| 26 | mir-223(1)     | 0.000377               | 0.025329  | -66.4              | 5.36E-08       | 1.21E-06   |
| 27 | mir-551a(1)    | 0.000000               | 0.000288  | -64.9              | 1.28E-03       | 4.93E-03   |
| 28 | mir-196a-1(3)  | 0.001685               | 0.099951  | -59.2              | 7.73E-08       | 1.63E-06   |
| 29 | mir-153-1(2)   | 0.000208               | 0.011377  | -53.8              | 6.77E-05       | 4.42E-04   |
| 30 | mir-187(1)     | 0.000033               | 0.001995  | -52.2              | 1.96E-05       | 1.68E-04   |

|    | A             | B        | C        | D     | E        | F        |
|----|---------------|----------|----------|-------|----------|----------|
| 31 | mir-556(1)    | 0.000000 | 0.000235 | -51.2 | 5.72E-02 | 1.27E-01 |
| 32 | mir-934(1)    | 0.000000 | 0.000230 | -51.1 | 1.36E-02 | 3.81E-02 |
| 33 | mir-676(1)    | 0.000000 | 0.000217 | -46.6 | 2.79E-02 | 6.85E-02 |
| 34 | mir-504(1)    | 0.000065 | 0.003331 | -46.2 | 1.88E-06 | 2.59E-05 |
| 35 | mir-96(3)     | 0.002162 | 0.098394 | -45.5 | 1.62E-10 | 7.31E-09 |
| 36 | mir-1295(1)   | 0.000000 | 0.000163 | -36.3 | 7.05E-02 | 1.50E-01 |
| 37 | mir-2681(2)   | 0.000000 | 0.000163 | -36.2 | 8.55E-03 | 2.66E-02 |
| 38 | mir-95(1)     | 0.000208 | 0.007546 | -35.5 | 6.03E-06 | 5.98E-05 |
| 39 | mir-873(2)    | 0.000066 | 0.002487 | -34.6 | 3.74E-05 | 2.89E-04 |
| 40 | mir-144(2)    | 0.050206 | 1.679495 | -33.5 | 3.96E-05 | 2.96E-04 |
| 41 | mir-338(1)    | 0.001272 | 0.041242 | -32.5 | 2.60E-06 | 3.16E-05 |
| 42 | mir-210(1)    | 0.012112 | 0.375648 | -31.0 | 9.38E-07 | 1.42E-05 |
| 43 | mir-4772(1)   | 0.000000 | 0.000131 | -29.0 | 9.32E-03 | 2.81E-02 |
| 44 | mir-1-1(4)    | 0.011704 | 0.329325 | -28.1 | 2.88E-04 | 1.52E-03 |
| 45 | mir-204(1)    | 0.000304 | 0.007683 | -24.7 | 1.68E-05 | 1.48E-04 |
| 46 | mir-551b(1)   | 0.000072 | 0.001660 | -22.5 | 1.90E-03 | 6.85E-03 |
| 47 | mir-1976(1)   | 0.000000 | 0.000103 | -21.6 | 3.13E-02 | 7.64E-02 |
| 48 | mir-142(1)    | 0.010269 | 0.194757 | -18.9 | 8.18E-06 | 7.86E-05 |
| 49 | mir-126(1)    | 0.058757 | 1.103312 | -18.8 | 2.64E-08 | 6.44E-07 |
| 50 | mir-346(1)    | 0.000000 | 0.000087 | -18.7 | 4.94E-02 | 1.13E-01 |
| 51 | mir-3690-1(2) | 0.000000 | 0.000088 | -18.6 | 1.86E-01 | 3.09E-01 |
| 52 | mir-105-1(3)  | 0.000000 | 0.000068 | -18.4 | 2.24E-02 | 5.63E-02 |
| 53 | mir-9-1(3)    | 0.001126 | 0.019518 | -17.5 | 4.98E-05 | 3.36E-04 |
| 54 | mir-577(1)    | 0.000000 | 0.000074 | -17.0 | 5.39E-02 | 1.21E-01 |
| 55 | mir-3620(1)   | 0.000000 | 0.000072 | -16.7 | 1.38E-01 | 2.46E-01 |
| 56 | mir-448(5)    | 0.000000 | 0.000068 | -15.5 | 1.17E-01 | 2.23E-01 |
| 57 | mir-149(1)    | 0.002364 | 0.030756 | -13.0 | 2.59E-04 | 1.44E-03 |
| 58 | mir-202(1)    | 0.000201 | 0.002705 | -13.0 | 1.68E-03 | 6.13E-03 |
| 59 | mir-486(1)    | 0.002510 | 0.031911 | -12.7 | 2.51E-06 | 3.16E-05 |
| 60 | mir-139(1)    | 0.002007 | 0.024784 | -12.3 | 2.16E-07 | 3.81E-06 |

|    | A            | B        | C        | D     | E        | F        |
|----|--------------|----------|----------|-------|----------|----------|
| 61 | mir-489(2)   | 0.000071 | 0.000921 | -12.0 | 7.84E-04 | 3.27E-03 |
| 62 | mir-101-1(2) | 0.065952 | 0.787835 | -11.9 | 6.30E-07 | 1.05E-05 |
| 63 | mir-3614(1)  | 0.000000 | 0.000053 | -11.7 | 1.28E-01 | 2.33E-01 |
| 64 | mir-2110(1)  | 0.000277 | 0.003113 | -11.1 | 5.20E-06 | 5.31E-05 |
| 65 | mir-1250(1)  | 0.000000 | 0.000043 | -11.0 | 2.25E-01 | 3.65E-01 |
| 66 | mir-1229(1)  | 0.000000 | 0.000042 | -11.0 | 2.58E-01 | 3.95E-01 |
| 67 | mir-4709(1)  | 0.000000 | 0.000041 | -10.6 | 1.13E-01 | 2.17E-01 |
| 68 | mir-3617(1)  | 0.000032 | 0.000373 | -9.2  | 1.55E-01 | 2.74E-01 |
| 69 | mir-146b(1)  | 0.018175 | 0.165459 | -9.1  | 1.32E-04 | 7.73E-04 |
| 70 | mir-4802(1)  | 0.000000 | 0.000029 | -8.5  | 2.68E-01 | 4.08E-01 |
| 71 | mir-2276(1)  | 0.000000 | 0.000039 | -8.3  | 3.08E-01 | 4.47E-01 |
| 72 | mir-3612(1)  | 0.000000 | 0.000035 | -7.2  | 2.76E-01 | 4.15E-01 |
| 73 | mir-598(1)   | 0.000416 | 0.002984 | -7.2  | 3.56E-04 | 1.76E-03 |
| 74 | mir-5193(2)  | 0.000000 | 0.000033 | -7.1  | 3.06E-01 | 4.46E-01 |
| 75 | mir-195(2)   | 0.080842 | 0.542734 | -6.7  | 4.48E-05 | 3.16E-04 |
| 76 | mir-582(1)   | 0.000667 | 0.004212 | -6.3  | 2.21E-02 | 5.61E-02 |
| 77 | mir-1286(1)  | 0.000000 | 0.000028 | -5.8  | 2.82E-01 | 4.21E-01 |
| 78 | mir-874(1)   | 0.002975 | 0.017094 | -5.7  | 3.41E-04 | 1.72E-03 |
| 79 | mir-184(1)   | 0.000039 | 0.000206 | -5.4  | 1.28E-01 | 2.33E-01 |
| 80 | mir-499(1)   | 0.000457 | 0.002417 | -5.3  | 1.74E-01 | 2.95E-01 |
| 81 | mir-1266(1)  | 0.000000 | 0.000026 | -5.2  | 3.87E-01 | 5.35E-01 |
| 82 | mir-378(1)   | 0.174375 | 0.899292 | -5.2  | 7.64E-05 | 4.85E-04 |
| 83 | mir-192(4)   | 0.007583 | 0.038657 | -5.1  | 1.09E-04 | 6.65E-04 |
| 84 | mir-33a(1)   | 0.005803 | 0.028281 | -4.9  | 1.36E-04 | 7.84E-04 |
| 85 | mir-455(1)   | 0.021709 | 0.092868 | -4.3  | 1.04E-03 | 4.13E-03 |
| 86 | mir-652(1)   | 0.009102 | 0.038397 | -4.2  | 3.08E-04 | 1.60E-03 |
| 87 | mir-371(3)   | 0.000065 | 0.000280 | -4.2  | 1.67E-01 | 2.86E-01 |
| 88 | mir-181c(2)  | 0.008328 | 0.034252 | -4.1  | 5.90E-04 | 2.61E-03 |
| 89 | mir-133b(2)  | 0.000329 | 0.001304 | -4.1  | 2.29E-01 | 3.70E-01 |
| 90 | mir-320(1)   | 0.181419 | 0.665174 | -3.7  | 2.16E-04 | 1.22E-03 |

|     | A             | B        | C        | D    | E        | F        |
|-----|---------------|----------|----------|------|----------|----------|
| 91  | mir-887(1)    | 0.003522 | 0.012395 | -3.5 | 1.44E-02 | 3.98E-02 |
| 92  | mir-146a(1)   | 0.056184 | 0.185724 | -3.3 | 4.00E-02 | 9.40E-02 |
| 93  | mir-190a(1)   | 0.008561 | 0.028251 | -3.3 | 7.44E-03 | 2.36E-02 |
| 94  | mir-26a-1(2)  | 1.220133 | 3.933767 | -3.2 | 1.72E-02 | 4.62E-02 |
| 95  | mir-219-1(2)  | 0.000389 | 0.001217 | -3.2 | 1.81E-01 | 3.03E-01 |
| 96  | mir-1468(1)   | 0.000116 | 0.000356 | -3.2 | 2.22E-01 | 3.63E-01 |
| 97  | mir-124-1(3)  | 0.000142 | 0.000456 | -3.2 | 5.45E-02 | 1.22E-01 |
| 98  | mir-592(1)    | 0.000033 | 0.000112 | -3.1 | 1.74E-01 | 2.95E-01 |
| 99  | mir-1249(1)   | 0.000129 | 0.000431 | -3.1 | 2.74E-01 | 4.15E-01 |
| 100 | mir-190b(1)   | 0.000238 | 0.000730 | -3.0 | 7.45E-02 | 1.55E-01 |
| 101 | mir-10b(1)    | 0.246911 | 0.724261 | -2.9 | 1.64E-01 | 2.82E-01 |
| 102 | mir-199b(1)   | 0.491245 | 1.436779 | -2.9 | 5.54E-03 | 1.81E-02 |
| 103 | mir-1179(1)   | 0.000033 | 0.000101 | -2.9 | 2.43E-01 | 3.82E-01 |
| 104 | mir-561(1)    | 0.000129 | 0.000379 | -2.9 | 1.21E-01 | 2.25E-01 |
| 105 | mir-181a-1(4) | 0.208754 | 0.595786 | -2.9 | 3.69E-03 | 1.26E-02 |
| 106 | mir-33b(1)    | 0.001636 | 0.004609 | -2.8 | 1.06E-01 | 2.05E-01 |
| 107 | mir-30b(2)    | 0.226560 | 0.640463 | -2.8 | 1.12E-03 | 4.38E-03 |
| 108 | mir-1269(1)   | 0.000000 | 0.000017 | -2.8 | 6.33E-01 | 7.49E-01 |
| 109 | mir-328(1)    | 0.001606 | 0.004495 | -2.8 | 3.89E-02 | 9.20E-02 |
| 110 | mir-143(2)    | 3.833894 | 9.717483 | -2.5 | 5.91E-02 | 1.29E-01 |
| 111 | mir-199a-1(3) | 1.063376 | 2.683622 | -2.5 | 1.53E-02 | 4.15E-02 |
| 112 | mir-3130(1)   | 0.000064 | 0.000160 | -2.3 | 4.16E-01 | 5.59E-01 |
| 113 | mir-574(1)    | 0.032733 | 0.075915 | -2.3 | 1.00E-02 | 2.97E-02 |
| 114 | mir-28(1)     | 0.082707 | 0.190600 | -2.3 | 6.42E-03 | 2.08E-02 |
| 115 | mir-642(1)    | 0.000065 | 0.000167 | -2.3 | 5.01E-01 | 6.33E-01 |
| 116 | mir-3064(1)   | 0.000097 | 0.000233 | -2.3 | 4.53E-01 | 5.84E-01 |
| 117 | mir-708(1)    | 0.034400 | 0.077210 | -2.2 | 2.01E-02 | 5.18E-02 |
| 118 | mir-335(1)    | 0.051809 | 0.107719 | -2.1 | 4.95E-02 | 1.13E-01 |
| 119 | mir-342(1)    | 0.030905 | 0.061925 | -2.0 | 4.71E-03 | 1.59E-02 |
| 120 | mir-331(1)    | 0.010073 | 0.019641 | -2.0 | 5.32E-02 | 1.20E-01 |

|     | A             | B        | C         | D    | E        | F        |
|-----|---------------|----------|-----------|------|----------|----------|
| 121 | mir-4473(1)   | 0.000033 | 0.000070  | -1.9 | 4.50E-01 | 5.82E-01 |
| 122 | mir-548b(1)   | 0.000271 | 0.000522  | -1.9 | 1.64E-01 | 2.82E-01 |
| 123 | mir-135a-1(3) | 0.570223 | 1.097216  | -1.9 | 1.78E-02 | 4.73E-02 |
| 124 | mir-197(1)    | 0.009938 | 0.019043  | -1.9 | 6.23E-02 | 1.35E-01 |
| 125 | mir-3938(1)   | 0.000000 | 0.000004  | -1.8 | 7.18E-01 | 8.02E-01 |
| 126 | mir-98(13)    | 8.061245 | 14.868133 | -1.8 | 1.88E-02 | 4.93E-02 |
| 127 | mir-505(1)    | 0.003818 | 0.007002  | -1.8 | 8.97E-02 | 1.77E-01 |
| 128 | mir-5092(1)   | 0.000000 | 0.000004  | -1.8 | 7.08E-01 | 7.94E-01 |
| 129 | mir-550-1(3)  | 0.000577 | 0.001049  | -1.8 | 1.31E-01 | 2.36E-01 |
| 130 | mir-627(1)    | 0.001748 | 0.003079  | -1.8 | 2.93E-01 | 4.32E-01 |
| 131 | mir-937(1)    | 0.000033 | 0.000059  | -1.7 | 6.88E-01 | 7.87E-01 |
| 132 | mir-1226(1)   | 0.000174 | 0.000297  | -1.7 | 3.80E-01 | 5.28E-01 |
| 133 | mir-188(8)    | 0.079878 | 0.136409  | -1.7 | 4.49E-02 | 1.05E-01 |
| 134 | mir-32(1)     | 0.009920 | 0.016909  | -1.7 | 3.05E-01 | 4.46E-01 |
| 135 | mir-3145(1)   | 0.000033 | 0.000055  | -1.7 | 6.61E-01 | 7.64E-01 |
| 136 | mir-4731(1)   | 0.000032 | 0.000061  | -1.7 | 6.14E-01 | 7.34E-01 |
| 137 | mir-2467(1)   | 0.000000 | 0.000002  | -1.7 | 7.08E-01 | 7.94E-01 |
| 138 | mir-1307(1)   | 0.026288 | 0.043879  | -1.7 | 2.00E-01 | 3.28E-01 |
| 139 | mir-218-1(3)  | 0.051630 | 0.084537  | -1.6 | 1.21E-01 | 2.25E-01 |
| 140 | mir-3940(1)   | 0.000064 | 0.000107  | -1.6 | 6.28E-01 | 7.47E-01 |
| 141 | mir-147(1)    | 0.000910 | 0.001446  | -1.6 | 6.13E-01 | 7.34E-01 |
| 142 | mir-324(1)    | 0.029252 | 0.045216  | -1.5 | 2.93E-01 | 4.32E-01 |
| 143 | mir-1227(1)   | 0.000039 | 0.000064  | -1.5 | 7.26E-01 | 8.07E-01 |
| 144 | mir-135b(1)   | 0.002051 | 0.003102  | -1.5 | 3.40E-01 | 4.83E-01 |
| 145 | mir-4789(1)   | 0.000066 | 0.000097  | -1.5 | 6.62E-01 | 7.64E-01 |
| 146 | mir-26b(1)    | 0.603861 | 0.901023  | -1.5 | 2.50E-01 | 3.88E-01 |
| 147 | mir-3194(1)   | 0.000208 | 0.000311  | -1.5 | 5.45E-01 | 6.78E-01 |
| 148 | mir-643(1)    | 0.000071 | 0.000095  | -1.4 | 5.67E-01 | 6.97E-01 |
| 149 | mir-345(1)    | 0.008156 | 0.011641  | -1.4 | 1.84E-01 | 3.06E-01 |
| 150 | mir-450a-1(4) | 0.090627 | 0.128143  | -1.4 | 4.08E-01 | 5.53E-01 |

|     | A           | B        | C        | D    | E        | F        |
|-----|-------------|----------|----------|------|----------|----------|
| 151 | mir-1180(1) | 0.001269 | 0.001707 | -1.4 | 4.21E-01 | 5.61E-01 |
| 152 | mir-3065(1) | 0.000679 | 0.000901 | -1.3 | 6.51E-01 | 7.61E-01 |
| 153 | mir-140(1)  | 0.207659 | 0.278880 | -1.3 | 4.43E-01 | 5.77E-01 |
| 154 | mir-4690(1) | 0.000072 | 0.000093 | -1.3 | 7.98E-01 | 8.64E-01 |
| 155 | mir-30a(4)  | 1.114134 | 1.472763 | -1.3 | 4.06E-01 | 5.52E-01 |
| 156 | mir-1537(1) | 0.000104 | 0.000132 | -1.3 | 7.50E-01 | 8.20E-01 |
| 157 | mir-3613(1) | 0.009482 | 0.012200 | -1.3 | 4.81E-01 | 6.18E-01 |
| 158 | mir-1237(1) | 0.000032 | 0.000047 | -1.3 | 8.46E-01 | 8.88E-01 |
| 159 | mir-130a(1) | 0.402837 | 0.501141 | -1.2 | 4.88E-01 | 6.21E-01 |
| 160 | mir-1301(1) | 0.001424 | 0.001747 | -1.2 | 6.13E-01 | 7.34E-01 |
| 161 | mir-576(1)  | 0.003011 | 0.003553 | -1.2 | 7.67E-01 | 8.36E-01 |
| 162 | mir-3074(1) | 0.000142 | 0.000164 | -1.2 | 8.57E-01 | 8.95E-01 |
| 163 | mir-99b(3)  | 0.531275 | 0.617693 | -1.2 | 5.36E-01 | 6.71E-01 |
| 164 | mir-4636(1) | 0.000299 | 0.000336 | -1.1 | 8.99E-01 | 9.22E-01 |
| 165 | mir-107(1)  | 0.068642 | 0.076610 | -1.1 | 7.35E-01 | 8.12E-01 |
| 166 | mir-423(2)  | 0.191757 | 0.213821 | -1.1 | 7.09E-01 | 7.94E-01 |
| 167 | mir-1296(1) | 0.001302 | 0.001447 | -1.1 | 8.02E-01 | 8.65E-01 |
| 168 | mir-6720(1) | 0.000362 | 0.000376 | -1.1 | 9.47E-01 | 9.62E-01 |
| 169 | mir-1271(1) | 0.004392 | 0.004676 | -1.1 | 8.61E-01 | 8.95E-01 |
| 170 | mir-1287(1) | 0.001635 | 0.001703 | -1.0 | 9.04E-01 | 9.25E-01 |
| 171 | mir-330(1)  | 0.007119 | 0.007474 | -1.0 | 8.81E-01 | 9.07E-01 |
| 172 | mir-766(1)  | 0.000896 | 0.000925 | -1.0 | 9.61E-01 | 9.73E-01 |
| 173 | mir-424(2)  | 1.430895 | 1.437491 | -1.0 | 9.89E-01 | 9.99E-01 |
| 174 | mir-1251(1) | 0.000000 | 0.000000 | 0.0  | 1.00E+00 | 1.00E+00 |
| 175 | mir-3120(1) | 0.000000 | 0.000000 | 0.0  | 1.00E+00 | 1.00E+00 |
| 176 | mir-2114(1) | 0.000176 | 0.000174 | 1.0  | 9.96E-01 | 1.00E+00 |
| 177 | mir-769(1)  | 0.025724 | 0.024513 | 1.0  | 8.75E-01 | 9.03E-01 |
| 178 | mir-3146(1) | 0.000039 | 0.000044 | 1.1  | 9.26E-01 | 9.44E-01 |
| 179 | mir-17(12)  | 1.908019 | 1.754327 | 1.1  | 7.49E-01 | 8.20E-01 |
| 180 | mir-1306(1) | 0.000853 | 0.000771 | 1.1  | 8.05E-01 | 8.65E-01 |

|     | A            | B         | C        | D   | E        | F        |
|-----|--------------|-----------|----------|-----|----------|----------|
| 181 | mir-25(3)    | 0.789050  | 0.706438 | 1.1 | 6.41E-01 | 7.52E-01 |
| 182 | mir-148b(1)  | 0.473930  | 0.417506 | 1.1 | 6.93E-01 | 7.90E-01 |
| 183 | mir-3912(1)  | 0.000515  | 0.000452 | 1.2 | 8.73E-01 | 9.03E-01 |
| 184 | mir-625(1)   | 0.005219  | 0.004499 | 1.2 | 7.01E-01 | 7.94E-01 |
| 185 | mir-484(1)   | 0.017594  | 0.014726 | 1.2 | 5.62E-01 | 6.93E-01 |
| 186 | mir-5187(1)  | 0.000137  | 0.000115 | 1.2 | 8.59E-01 | 8.95E-01 |
| 187 | mir-597(1)   | 0.000442  | 0.000361 | 1.2 | 8.16E-01 | 8.65E-01 |
| 188 | mir-23a(6)   | 11.297341 | 9.158310 | 1.2 | 4.41E-01 | 5.77E-01 |
| 189 | mir-152(1)   | 0.617429  | 0.499666 | 1.2 | 5.46E-01 | 6.78E-01 |
| 190 | mir-1277(1)  | 0.003808  | 0.003046 | 1.2 | 7.39E-01 | 8.14E-01 |
| 191 | mir-193a(5)  | 0.392482  | 0.316366 | 1.2 | 4.87E-01 | 6.21E-01 |
| 192 | mir-4638(1)  | 0.000103  | 0.000085 | 1.3 | 7.72E-01 | 8.38E-01 |
| 193 | mir-3157(1)  | 0.000148  | 0.000105 | 1.3 | 8.16E-01 | 8.65E-01 |
| 194 | mir-651(1)   | 0.002437  | 0.001902 | 1.3 | 5.47E-01 | 6.78E-01 |
| 195 | mir-186(1)   | 0.412734  | 0.312966 | 1.3 | 4.42E-01 | 5.77E-01 |
| 196 | mir-877(1)   | 0.001271  | 0.000949 | 1.3 | 4.40E-01 | 5.77E-01 |
| 197 | mir-383(1)   | 0.000314  | 0.000241 | 1.3 | 6.66E-01 | 7.65E-01 |
| 198 | mir-636(1)   | 0.000096  | 0.000078 | 1.3 | 8.09E-01 | 8.65E-01 |
| 199 | mir-1284(1)  | 0.000032  | 0.000020 | 1.3 | 8.16E-01 | 8.65E-01 |
| 200 | mir-552(1)   | 0.000039  | 0.000023 | 1.4 | 8.34E-01 | 8.78E-01 |
| 201 | mir-3136(1)  | 0.000136  | 0.000100 | 1.4 | 6.37E-01 | 7.50E-01 |
| 202 | mir-216a(3)  | 0.000693  | 0.000477 | 1.4 | 4.16E-01 | 5.59E-01 |
| 203 | mir-629(1)   | 0.015338  | 0.010656 | 1.4 | 3.65E-01 | 5.14E-01 |
| 204 | mir-185(1)   | 0.109077  | 0.075703 | 1.4 | 2.33E-01 | 3.72E-01 |
| 205 | mir-296(1)   | 0.003127  | 0.002125 | 1.5 | 3.34E-01 | 4.77E-01 |
| 206 | mir-744(1)   | 0.030374  | 0.020638 | 1.5 | 2.42E-01 | 3.82E-01 |
| 207 | mir-129-1(2) | 0.002473  | 0.001637 | 1.5 | 3.98E-01 | 5.47E-01 |
| 208 | mir-208b(1)  | 0.000072  | 0.000048 | 1.5 | 8.25E-01 | 8.72E-01 |
| 209 | mir-580(1)   | 0.000131  | 0.000091 | 1.5 | 6.62E-01 | 7.64E-01 |
| 210 | mir-1233(2)  | 0.000033  | 0.000019 | 1.5 | 7.03E-01 | 7.94E-01 |

|     | A             | B        | C        | D   | E        | F        |
|-----|---------------|----------|----------|-----|----------|----------|
| 211 | mir-3173(1)   | 0.000104 | 0.000072 | 1.5 | 6.61E-01 | 7.64E-01 |
| 212 | mir-942(1)    | 0.000998 | 0.000634 | 1.6 | 2.41E-01 | 3.82E-01 |
| 213 | mir-1909(1)   | 0.000039 | 0.000019 | 1.6 | 7.34E-01 | 8.12E-01 |
| 214 | mir-3605(1)   | 0.000867 | 0.000534 | 1.6 | 5.16E-01 | 6.49E-01 |
| 215 | mir-2116(1)   | 0.000176 | 0.000107 | 1.6 | 5.83E-01 | 7.11E-01 |
| 216 | mir-3664(1)   | 0.000097 | 0.000057 | 1.7 | 6.29E-01 | 7.47E-01 |
| 217 | mir-4804(1)   | 0.000202 | 0.000117 | 1.7 | 5.83E-01 | 7.11E-01 |
| 218 | mir-1256(1)   | 0.000097 | 0.000063 | 1.7 | 5.94E-01 | 7.19E-01 |
| 219 | mir-3155(1)   | 0.000033 | 0.000015 | 1.8 | 5.91E-01 | 7.18E-01 |
| 220 | mir-1292(1)   | 0.000856 | 0.000471 | 1.8 | 3.68E-01 | 5.16E-01 |
| 221 | mir-10a(1)    | 0.223937 | 0.122253 | 1.8 | 3.15E-01 | 4.56E-01 |
| 222 | mir-570(1)    | 0.001792 | 0.000991 | 1.8 | 4.34E-01 | 5.75E-01 |
| 223 | mir-301a(2)   | 0.043220 | 0.023255 | 1.9 | 8.71E-02 | 1.75E-01 |
| 224 | mir-103-1(2)  | 2.337324 | 1.246508 | 1.9 | 1.60E-01 | 2.80E-01 |
| 225 | mir-3928(1)   | 0.000404 | 0.000209 | 1.9 | 4.44E-01 | 5.77E-01 |
| 226 | mir-22(1)     | 2.689998 | 1.419786 | 1.9 | 1.18E-01 | 2.23E-01 |
| 227 | mir-339(1)    | 0.045870 | 0.023962 | 1.9 | 4.63E-02 | 1.07E-01 |
| 228 | mir-3942(1)   | 0.000103 | 0.000052 | 1.9 | 3.96E-01 | 5.45E-01 |
| 229 | mir-3126(1)   | 0.000207 | 0.000111 | 1.9 | 4.99E-01 | 6.33E-01 |
| 230 | mir-191(2)    | 0.847044 | 0.437943 | 1.9 | 2.33E-03 | 8.10E-03 |
| 231 | mir-2277(1)   | 0.000960 | 0.000477 | 2.0 | 3.51E-01 | 4.96E-01 |
| 232 | mir-361(1)    | 0.083594 | 0.041121 | 2.0 | 8.04E-02 | 1.63E-01 |
| 233 | mir-1245(2)   | 0.000352 | 0.000161 | 2.0 | 3.33E-01 | 4.77E-01 |
| 234 | mir-584(1)    | 0.002561 | 0.001225 | 2.1 | 2.32E-01 | 3.72E-01 |
| 235 | mir-151(1)    | 0.605144 | 0.291741 | 2.1 | 1.62E-03 | 5.98E-03 |
| 236 | mir-760(1)    | 0.009477 | 0.004431 | 2.1 | 8.76E-02 | 1.75E-01 |
| 237 | mir-1270-1(1) | 0.000465 | 0.000218 | 2.2 | 7.73E-02 | 1.58E-01 |
| 238 | mir-1270-2(1) | 0.000465 | 0.000218 | 2.2 | 7.73E-02 | 1.58E-01 |
| 239 | mir-659(1)    | 0.000337 | 0.000144 | 2.3 | 3.70E-01 | 5.17E-01 |
| 240 | mir-605(1)    | 0.000266 | 0.000112 | 2.3 | 3.28E-01 | 4.72E-01 |



|     | A            | B        | C        | D   | E        | F        |
|-----|--------------|----------|----------|-----|----------|----------|
| 241 | mir-4766(1)  | 0.000142 | 0.000053 | 2.3 | 4.01E-01 | 5.49E-01 |
| 242 | mir-128-1(2) | 0.038481 | 0.016384 | 2.3 | 1.08E-02 | 3.17E-02 |
| 243 | mir-132(2)   | 0.020230 | 0.008202 | 2.5 | 8.94E-02 | 1.77E-01 |
| 244 | mir-3692(1)  | 0.000066 | 0.000021 | 2.6 | 2.44E-01 | 3.82E-01 |
| 245 | mir-624(1)   | 0.001190 | 0.000440 | 2.7 | 2.44E-01 | 3.82E-01 |
| 246 | mir-937(2)   | 0.000280 | 0.000094 | 2.7 | 2.86E-01 | 4.25E-01 |
| 247 | mir-4326(1)  | 0.000630 | 0.000213 | 2.9 | 1.62E-01 | 2.82E-01 |
| 248 | mir-590(1)   | 0.025465 | 0.008843 | 2.9 | 1.39E-02 | 3.87E-02 |
| 249 | mir-130b(2)  | 0.087822 | 0.030408 | 2.9 | 7.28E-04 | 3.12E-03 |
| 250 | mir-374a(4)  | 0.386100 | 0.130225 | 3.0 | 8.21E-03 | 2.58E-02 |
| 251 | mir-3679(1)  | 0.000239 | 0.000077 | 3.0 | 1.45E-01 | 2.58E-01 |
| 252 | mir-3175(1)  | 0.000033 | 0.000008 | 3.1 | 4.19E-01 | 5.60E-01 |
| 253 | mir-498(46)  | 0.055535 | 0.018084 | 3.1 | 1.94E-02 | 5.04E-02 |
| 254 | mir-579(1)   | 0.000584 | 0.000188 | 3.1 | 1.76E-01 | 2.97E-01 |
| 255 | mir-3187(1)  | 0.000299 | 0.000087 | 3.1 | 5.82E-02 | 1.28E-01 |
| 256 | mir-127(8)   | 1.365609 | 0.437495 | 3.1 | 8.21E-02 | 1.66E-01 |
| 257 | mir-491(1)   | 0.005231 | 0.001570 | 3.3 | 2.17E-02 | 5.55E-02 |
| 258 | mir-1228(1)  | 0.000233 | 0.000062 | 3.4 | 2.76E-01 | 4.15E-01 |
| 259 | mir-3177(1)  | 0.000175 | 0.000050 | 3.4 | 1.20E-01 | 2.24E-01 |
| 260 | mir-3657(1)  | 0.000168 | 0.000041 | 3.4 | 1.11E-01 | 2.15E-01 |
| 261 | mir-1255a(1) | 0.001163 | 0.000350 | 3.4 | 3.76E-02 | 9.04E-02 |
| 262 | let-7i(1)    | 4.692858 | 1.353406 | 3.5 | 4.86E-03 | 1.62E-02 |
| 263 | mir-3691(1)  | 0.000149 | 0.000035 | 3.5 | 2.52E-01 | 3.89E-01 |
| 264 | mir-933(1)   | 0.000098 | 0.000022 | 3.5 | 2.53E-01 | 3.89E-01 |
| 265 | mir-15a(4)   | 1.848001 | 0.523296 | 3.5 | 8.68E-03 | 2.67E-02 |
| 266 | mir-4504(1)  | 0.000105 | 0.000028 | 3.8 | 1.17E-01 | 2.23E-01 |
| 267 | mir-1908(1)  | 0.000280 | 0.000064 | 3.8 | 1.56E-01 | 2.75E-01 |
| 268 | mir-3138(1)  | 0.000104 | 0.000021 | 3.9 | 2.00E-01 | 3.28E-01 |
| 269 | mir-1304(1)  | 0.001214 | 0.000306 | 3.9 | 5.39E-03 | 1.78E-02 |
| 270 | mir-589(1)   | 0.002130 | 0.000540 | 4.0 | 3.39E-04 | 1.72E-03 |

|     | A           | B        | C        | D   | E        | F        |
|-----|-------------|----------|----------|-----|----------|----------|
| 271 | mir-618(1)  | 0.000836 | 0.000218 | 4.0 | 1.31E-01 | 2.36E-01 |
| 272 | mir-548(2)  | 0.006308 | 0.001531 | 4.1 | 2.96E-05 | 2.41E-04 |
| 273 | mir-340(1)  | 0.013417 | 0.003127 | 4.3 | 7.27E-02 | 1.53E-01 |
| 274 | mir-641(1)  | 0.001658 | 0.000382 | 4.3 | 2.43E-02 | 6.06E-02 |
| 275 | mir-616(1)  | 0.000834 | 0.000176 | 4.5 | 9.63E-02 | 1.88E-01 |
| 276 | mir-224(2)  | 0.604377 | 0.134475 | 4.5 | 1.13E-06 | 1.63E-05 |
| 277 | mir-628(1)  | 0.007098 | 0.001594 | 4.5 | 3.50E-03 | 1.20E-02 |
| 278 | mir-1305(1) | 0.000247 | 0.000046 | 4.6 | 1.10E-02 | 3.21E-02 |
| 279 | mir-3934(1) | 0.001599 | 0.000338 | 4.8 | 7.26E-03 | 2.32E-02 |
| 280 | mir-671(1)  | 0.051500 | 0.010682 | 4.8 | 1.01E-03 | 4.06E-03 |
| 281 | mir-770(1)  | 0.000500 | 0.000099 | 4.8 | 3.28E-02 | 7.93E-02 |
| 282 | mir-3200(1) | 0.002699 | 0.000543 | 4.8 | 5.29E-04 | 2.43E-03 |
| 283 | mir-370(1)  | 0.041376 | 0.008046 | 5.1 | 1.51E-03 | 5.71E-03 |
| 284 | mir-3944(1) | 0.000175 | 0.000034 | 5.4 | 7.55E-02 | 1.56E-01 |
| 285 | mir-92b(1)  | 0.026904 | 0.004971 | 5.4 | 3.37E-06 | 3.90E-05 |
| 286 | mir-2355(1) | 0.003292 | 0.000587 | 5.5 | 2.74E-04 | 1.48E-03 |
| 287 | mir-3158(1) | 0.002930 | 0.000526 | 5.6 | 1.50E-02 | 4.10E-02 |
| 288 | mir-449a(3) | 0.001246 | 0.000220 | 5.9 | 9.94E-03 | 2.97E-02 |
| 289 | mir-1278(1) | 0.000195 | 0.000026 | 6.0 | 7.31E-02 | 1.53E-01 |
| 290 | mir-4746(1) | 0.000276 | 0.000037 | 6.2 | 2.53E-02 | 6.27E-02 |
| 291 | mir-3677(1) | 0.000344 | 0.000050 | 6.7 | 1.18E-02 | 3.41E-02 |
| 292 | mir-1303(1) | 0.001326 | 0.000193 | 6.7 | 6.80E-04 | 2.95E-03 |
| 293 | mir-221(2)  | 8.077588 | 1.129882 | 7.1 | 6.20E-09 | 1.97E-07 |
| 294 | mir-29a(4)  | 5.673990 | 0.698015 | 8.1 | 5.40E-04 | 2.45E-03 |
| 295 | mir-5094(1) | 0.000065 | 0.000004 | 8.3 | 1.25E-01 | 2.30E-01 |
| 296 | mir-1276(1) | 0.000137 | 0.000019 | 8.6 | 1.88E-02 | 4.93E-02 |
| 297 | mir-3192(1) | 0.000071 | 0.000004 | 8.6 | 6.53E-02 | 1.41E-01 |
| 298 | mir-34b(2)  | 0.055249 | 0.005893 | 9.4 | 1.36E-05 | 1.27E-04 |
| 299 | mir-3909(1) | 0.001500 | 0.000162 | 9.4 | 1.21E-02 | 3.42E-02 |
| 300 | mir-1294(1) | 0.001156 | 0.000115 | 9.6 | 3.73E-04 | 1.82E-03 |

|     | A            | B         | C        | D     | E        | F        |
|-----|--------------|-----------|----------|-------|----------|----------|
| 301 | mir-134(43)  | 8.915426  | 0.849155 | 10.5  | 1.90E-08 | 5.01E-07 |
| 302 | mir-3619(1)  | 0.000575  | 0.000045 | 12.1  | 4.71E-04 | 2.19E-03 |
| 303 | mir-3193(1)  | 0.000168  | 0.000007 | 12.8  | 1.57E-03 | 5.86E-03 |
| 304 | mir-3174(1)  | 0.000344  | 0.000021 | 12.9  | 9.11E-03 | 2.78E-02 |
| 305 | mir-1910(1)  | 0.000227  | 0.000008 | 16.3  | 1.21E-02 | 3.42E-02 |
| 306 | mir-122(1)   | 0.002136  | 0.000094 | 20.3  | 1.18E-04 | 7.05E-04 |
| 307 | mir-7-1(3)   | 0.464601  | 0.022520 | 20.6  | 1.85E-10 | 7.31E-09 |
| 308 | mir-138-1(2) | 0.100872  | 0.004580 | 21.9  | 4.83E-09 | 1.70E-07 |
| 309 | mir-1252(1)  | 0.000661  | 0.000023 | 22.5  | 2.75E-04 | 1.48E-03 |
| 310 | mir-21(1)    | 69.811227 | 2.758412 | 25.3  | 1.59E-11 | 1.01E-09 |
| 311 | mir-34a(1)   | 1.243938  | 0.036352 | 34.2  | 1.48E-12 | 2.35E-10 |
| 312 | mir-155(1)   | 0.245820  | 0.006343 | 38.7  | 4.67E-12 | 3.70E-10 |
| 313 | mir-3176(1)  | 0.002346  | 0.000050 | 56.1  | 8.29E-09 | 2.39E-07 |
| 314 | mir-3919(1)  | 0.000715  | 0.000005 | 66.9  | 4.04E-05 | 2.96E-04 |
| 315 | mir-3152(1)  | 0.001908  | 0.000020 | 70.3  | 3.51E-06 | 3.90E-05 |
| 316 | mir-3117(1)  | 0.008820  | 0.000070 | 114.8 | 3.57E-06 | 3.90E-05 |
| 317 | mir-137(1)   | 0.168254  | 0.001172 | 142.9 | 8.94E-07 | 1.42E-05 |
| 318 | mir-31(1)    | 0.451502  | 0.000903 | 522.2 | 4.27E-11 | 2.26E-09 |
| 319 | mir-302a(5)  | 0.004977  | 0.000004 | 604.8 | 5.88E-15 | 1.87E-12 |

|    | A              | B                      | C         | D                  | E              | F          |
|----|----------------|------------------------|-----------|--------------------|----------------|------------|
| 1  |                | Relative frequency (%) |           |                    |                |            |
| 2  | <b>Cistron</b> | <b>iPSC</b>            | <b>NS</b> | <b>Fold change</b> | <b>P Value</b> | <b>FDR</b> |
| 3  | mir-302a(5)    | 29.172126              | 0.000004  | 3537143.1          | 1.24E-22       | 3.94E-20   |
| 4  | mir-1251(1)    | 0.005535               | 0.000000  | 1194.0             | 1.38E-08       | 9.30E-08   |
| 5  | mir-448(5)     | 0.045857               | 0.000068  | 636.5              | 1.25E-09       | 1.17E-08   |
| 6  | mir-371(3)     | 0.143652               | 0.000280  | 474.7              | 2.35E-09       | 2.01E-08   |
| 7  | mir-105-1(3)   | 0.040204               | 0.000068  | 472.1              | 7.37E-13       | 1.67E-11   |
| 8  | mir-124-1(3)   | 0.075053               | 0.000456  | 166.1              | 1.46E-11       | 2.72E-10   |
| 9  | mir-577(1)     | 0.008310               | 0.000074  | 105.8              | 3.09E-08       | 1.92E-07   |
| 10 | mir-1286(1)    | 0.002192               | 0.000028  | 81.3               | 1.95E-07       | 1.01E-06   |
| 11 | mir-3176(1)    | 0.003294               | 0.000050  | 78.8               | 6.77E-10       | 6.92E-09   |
| 12 | mir-1276(1)    | 0.001225               | 0.000019  | 73.9               | 1.12E-05       | 3.97E-05   |
| 13 | mir-1305(1)    | 0.003409               | 0.000046  | 62.6               | 1.11E-08       | 7.95E-08   |
| 14 | mir-92b(1)     | 0.303693               | 0.004971  | 61.0               | 8.32E-14       | 3.30E-12   |
| 15 | mir-1270-1(1)  | 0.012643               | 0.000218  | 58.3               | 1.60E-10       | 1.87E-09   |
| 16 | mir-1270-2(1)  | 0.012643               | 0.000218  | 58.3               | 1.60E-10       | 1.87E-09   |
| 17 | mir-3192(1)    | 0.000470               | 0.000004  | 54.7               | 1.71E-04       | 4.26E-04   |
| 18 | mir-5092(1)    | 0.000411               | 0.000004  | 49.2               | 9.36E-04       | 1.98E-03   |
| 19 | mir-1304(1)    | 0.015225               | 0.000306  | 48.2               | 1.23E-09       | 1.17E-08   |
| 20 | mir-4802(1)    | 0.001793               | 0.000029  | 45.6               | 1.40E-04       | 3.64E-04   |
| 21 | mir-1266(1)    | 0.001063               | 0.000026  | 44.0               | 2.66E-04       | 6.39E-04   |
| 22 | mir-3938(1)    | 0.000335               | 0.000004  | 40.3               | 2.01E-03       | 3.86E-03   |
| 23 | mir-1269(1)    | 0.000498               | 0.000017  | 38.9               | 1.86E-03       | 3.62E-03   |
| 24 | mir-1252(1)    | 0.001120               | 0.000023  | 38.1               | 1.79E-05       | 5.86E-05   |
| 25 | mir-1303(1)    | 0.007512               | 0.000193  | 37.7               | 3.76E-08       | 2.29E-07   |
| 26 | mir-3175(1)    | 0.000457               | 0.000008  | 37.3               | 9.32E-04       | 1.98E-03   |
| 27 | mir-340(1)     | 0.103021               | 0.003127  | 32.9               | 1.65E-04       | 4.19E-04   |
| 28 | mir-187(1)     | 0.065825               | 0.001995  | 32.5               | 1.14E-08       | 7.95E-08   |
| 29 | mir-3177(1)    | 0.001646               | 0.000050  | 31.2               | 1.32E-05       | 4.58E-05   |
| 30 | mir-4746(1)    | 0.001321               | 0.000037  | 29.6               | 4.50E-05       | 1.35E-04   |

|    | A            | B         | C        | D    | E        | F        |
|----|--------------|-----------|----------|------|----------|----------|
| 31 | mir-1910(1)  | 0.000418  | 0.000008 | 29.5 | 1.15E-03 | 2.33E-03 |
| 32 | mir-498(46)  | 0.506015  | 0.018084 | 28.1 | 5.81E-08 | 3.35E-07 |
| 33 | mir-3187(1)  | 0.002734  | 0.000087 | 27.8 | 4.30E-07 | 2.03E-06 |
| 34 | mir-135b(1)  | 0.085550  | 0.003102 | 27.5 | 3.49E-09 | 2.83E-08 |
| 35 | mir-5094(1)  | 0.000225  | 0.000004 | 26.4 | 5.72E-03 | 1.02E-02 |
| 36 | mir-589(1)   | 0.013496  | 0.000540 | 25.3 | 1.09E-10 | 1.39E-09 |
| 37 | mir-592(1)   | 0.003034  | 0.000112 | 25.2 | 5.93E-07 | 2.72E-06 |
| 38 | mir-296(1)   | 0.051732  | 0.002125 | 24.1 | 1.84E-09 | 1.67E-08 |
| 39 | mir-3664(1)  | 0.001448  | 0.000057 | 23.1 | 1.41E-03 | 2.79E-03 |
| 40 | mir-3677(1)  | 0.001144  | 0.000050 | 21.9 | 4.72E-05 | 1.40E-04 |
| 41 | mir-2467(1)  | 0.000149  | 0.000002 | 20.2 | 3.20E-03 | 5.86E-03 |
| 42 | mir-561(1)   | 0.007412  | 0.000379 | 18.7 | 1.53E-06 | 6.45E-06 |
| 43 | mir-643(1)   | 0.001919  | 0.000095 | 17.9 | 2.81E-07 | 1.37E-06 |
| 44 | mir-873(2)   | 0.037348  | 0.002487 | 14.9 | 1.06E-06 | 4.68E-06 |
| 45 | mir-1284(1)  | 0.000406  | 0.000020 | 14.5 | 2.33E-03 | 4.38E-03 |
| 46 | mir-552(1)   | 0.000419  | 0.000023 | 13.9 | 8.37E-03 | 1.45E-02 |
| 47 | mir-96(3)    | 1.356643  | 0.098394 | 13.8 | 3.50E-10 | 3.70E-09 |
| 48 | mir-942(1)   | 0.007569  | 0.000634 | 12.0 | 4.84E-08 | 2.84E-07 |
| 49 | mir-17(12)   | 19.326236 | 1.754327 | 11.0 | 6.96E-11 | 9.60E-10 |
| 50 | mir-760(1)   | 0.045920  | 0.004431 | 10.4 | 2.81E-06 | 1.09E-05 |
| 51 | mir-1250(1)  | 0.000518  | 0.000043 | 10.2 | 9.65E-03 | 1.60E-02 |
| 52 | mir-651(1)   | 0.018782  | 0.001902 | 9.9  | 1.53E-06 | 6.45E-06 |
| 53 | mir-129-1(2) | 0.016229  | 0.001637 | 9.8  | 9.04E-06 | 3.33E-05 |
| 54 | mir-556(1)   | 0.002188  | 0.000235 | 9.2  | 9.38E-03 | 1.57E-02 |
| 55 | mir-130b(2)  | 0.280982  | 0.030408 | 9.2  | 2.55E-09 | 2.13E-08 |
| 56 | mir-3065(1)  | 0.008398  | 0.000901 | 9.2  | 3.90E-04 | 8.96E-04 |
| 57 | mir-548b(1)  | 0.004834  | 0.000522 | 9.0  | 1.19E-06 | 5.18E-06 |
| 58 | mir-3138(1)  | 0.000255  | 0.000021 | 9.0  | 1.05E-02 | 1.73E-02 |
| 59 | mir-25(3)    | 6.269246  | 0.706438 | 8.9  | 4.13E-11 | 6.12E-10 |
| 60 | mir-449a(3)  | 0.001754  | 0.000220 | 8.3  | 1.08E-03 | 2.21E-03 |

|    | A            | B        | C        | D   | E        | F        |
|----|--------------|----------|----------|-----|----------|----------|
| 61 | mir-128-1(2) | 0.133747 | 0.016384 | 8.2 | 5.92E-08 | 3.35E-07 |
| 62 | mir-1229(1)  | 0.000401 | 0.000042 | 7.9 | 2.74E-02 | 4.08E-02 |
| 63 | mir-1226(1)  | 0.002402 | 0.000297 | 7.8 | 1.19E-04 | 3.17E-04 |
| 64 | mir-937(1)   | 0.000497 | 0.000059 | 7.6 | 2.67E-02 | 3.99E-02 |
| 65 | mir-9-1(3)   | 0.146753 | 0.019518 | 7.5 | 6.72E-05 | 1.94E-04 |
| 66 | mir-505(1)   | 0.051987 | 0.007002 | 7.4 | 2.16E-07 | 1.10E-06 |
| 67 | mir-3174(1)  | 0.000196 | 0.000021 | 7.2 | 1.88E-02 | 2.90E-02 |
| 68 | mir-580(1)   | 0.000654 | 0.000091 | 7.2 | 1.26E-02 | 2.04E-02 |
| 69 | mir-1908(1)  | 0.000530 | 0.000064 | 7.2 | 1.62E-02 | 2.52E-02 |
| 70 | mir-1301(1)  | 0.012380 | 0.001747 | 7.0 | 6.20E-06 | 2.31E-05 |
| 71 | mir-744(1)   | 0.142595 | 0.020638 | 6.9 | 3.41E-07 | 1.64E-06 |
| 72 | mir-1237(1)  | 0.000338 | 0.000047 | 6.8 | 1.93E-02 | 2.94E-02 |
| 73 | mir-1180(1)  | 0.011479 | 0.001707 | 6.7 | 2.27E-06 | 8.98E-06 |
| 74 | mir-3200(1)  | 0.003680 | 0.000543 | 6.6 | 1.52E-05 | 5.19E-05 |
| 75 | mir-7-1(3)   | 0.143920 | 0.022520 | 6.4 | 2.28E-07 | 1.15E-06 |
| 76 | mir-1909(1)  | 0.000154 | 0.000019 | 6.2 | 4.23E-02 | 6.06E-02 |
| 77 | mir-933(1)   | 0.000180 | 0.000022 | 6.1 | 3.80E-02 | 5.49E-02 |
| 78 | mir-1306(1)  | 0.004358 | 0.000771 | 5.6 | 4.93E-05 | 1.45E-04 |
| 79 | mir-551a(1)  | 0.001682 | 0.000288 | 5.6 | 1.08E-03 | 2.21E-03 |
| 80 | mir-2355(1)  | 0.003356 | 0.000587 | 5.6 | 6.17E-05 | 1.79E-04 |
| 81 | mir-1256(1)  | 0.000329 | 0.000063 | 5.5 | 3.37E-02 | 4.95E-02 |
| 82 | mir-3130(1)  | 0.000880 | 0.000160 | 5.3 | 2.46E-02 | 3.69E-02 |
| 83 | mir-1296(1)  | 0.007746 | 0.001447 | 5.3 | 7.15E-05 | 2.04E-04 |
| 84 | mir-636(1)   | 0.000385 | 0.000078 | 5.0 | 7.51E-02 | 1.03E-01 |
| 85 | mir-32(1)    | 0.084148 | 0.016909 | 5.0 | 9.85E-04 | 2.04E-03 |
| 86 | mir-877(1)   | 0.004759 | 0.000949 | 5.0 | 1.21E-05 | 4.28E-05 |
| 87 | mir-3691(1)  | 0.000206 | 0.000035 | 4.9 | 6.86E-02 | 9.45E-02 |
| 88 | mir-1277(1)  | 0.014927 | 0.003046 | 4.9 | 8.66E-03 | 1.48E-02 |
| 89 | mir-1307(1)  | 0.204830 | 0.043879 | 4.7 | 7.55E-05 | 2.12E-04 |
| 90 | mir-489(2)   | 0.004113 | 0.000921 | 4.7 | 5.62E-04 | 1.25E-03 |

|     | A            | B        | C        | D   | E        | F        |
|-----|--------------|----------|----------|-----|----------|----------|
| 91  | mir-504(1)   | 0.015559 | 0.003331 | 4.7 | 2.20E-04 | 5.41E-04 |
| 92  | mir-484(1)   | 0.063872 | 0.014726 | 4.3 | 5.37E-06 | 2.03E-05 |
| 93  | mir-641(1)   | 0.001645 | 0.000382 | 4.3 | 1.20E-02 | 1.95E-02 |
| 94  | mir-3679(1)  | 0.000332 | 0.000077 | 4.2 | 2.42E-02 | 3.65E-02 |
| 95  | mir-3117(1)  | 0.000316 | 0.000070 | 4.1 | 4.52E-02 | 6.37E-02 |
| 96  | mir-34b(2)   | 0.024101 | 0.005893 | 4.1 | 7.72E-04 | 1.68E-03 |
| 97  | mir-1278(1)  | 0.000128 | 0.000026 | 4.1 | 8.48E-02 | 1.13E-01 |
| 98  | mir-598(1)   | 0.012240 | 0.002984 | 4.1 | 3.49E-04 | 8.07E-04 |
| 99  | mir-4326(1)  | 0.000883 | 0.000213 | 4.0 | 3.42E-02 | 4.99E-02 |
| 100 | mir-4766(1)  | 0.000237 | 0.000053 | 4.0 | 8.13E-02 | 1.09E-01 |
| 101 | mir-2116(1)  | 0.000429 | 0.000107 | 3.9 | 6.16E-02 | 8.53E-02 |
| 102 | mir-3074(1)  | 0.000656 | 0.000164 | 3.9 | 5.11E-02 | 7.14E-02 |
| 103 | mir-184(1)   | 0.000821 | 0.000206 | 3.8 | 4.74E-02 | 6.65E-02 |
| 104 | mir-5193(2)  | 0.000115 | 0.000033 | 3.8 | 1.12E-01 | 1.45E-01 |
| 105 | mir-2276(1)  | 0.000146 | 0.000039 | 3.6 | 1.63E-01 | 2.06E-01 |
| 106 | mir-769(1)   | 0.085915 | 0.024513 | 3.5 | 4.31E-05 | 1.30E-04 |
| 107 | mir-301a(2)  | 0.077353 | 0.023255 | 3.3 | 5.09E-04 | 1.14E-03 |
| 108 | mir-3126(1)  | 0.000344 | 0.000111 | 3.1 | 1.59E-01 | 2.03E-01 |
| 109 | mir-597(1)   | 0.001101 | 0.000361 | 3.0 | 1.10E-01 | 1.43E-01 |
| 110 | mir-1228(1)  | 0.000201 | 0.000062 | 3.0 | 2.29E-01 | 2.72E-01 |
| 111 | mir-5187(1)  | 0.000345 | 0.000115 | 3.0 | 1.72E-01 | 2.15E-01 |
| 112 | mir-676(1)   | 0.000637 | 0.000217 | 3.0 | 1.22E-01 | 1.56E-01 |
| 113 | mir-31(1)    | 0.002510 | 0.000903 | 2.9 | 2.20E-02 | 3.33E-02 |
| 114 | mir-550-1(3) | 0.003011 | 0.001049 | 2.8 | 1.47E-03 | 2.90E-03 |
| 115 | mir-1287(1)  | 0.004843 | 0.001703 | 2.8 | 3.59E-03 | 6.55E-03 |
| 116 | mir-361(1)   | 0.114070 | 0.041121 | 2.8 | 5.75E-03 | 1.02E-02 |
| 117 | mir-937(2)   | 0.000284 | 0.000094 | 2.8 | 1.81E-01 | 2.24E-01 |
| 118 | mir-345(1)   | 0.031161 | 0.011641 | 2.7 | 9.58E-05 | 2.64E-04 |
| 119 | mir-3944(1)  | 0.000077 | 0.000034 | 2.6 | 2.02E-01 | 2.45E-01 |
| 120 | mir-374a(4)  | 0.335682 | 0.130225 | 2.6 | 8.39E-03 | 1.45E-02 |

|     | A             | B        | C        | D   | E        | F        |
|-----|---------------|----------|----------|-----|----------|----------|
| 121 | mir-548(2)    | 0.003923 | 0.001531 | 2.6 | 7.04E-04 | 1.55E-03 |
| 122 | mir-1233(2)   | 0.000053 | 0.000019 | 2.4 | 2.16E-01 | 2.58E-01 |
| 123 | mir-618(1)    | 0.000469 | 0.000218 | 2.3 | 2.84E-01 | 3.36E-01 |
| 124 | mir-130a(1)   | 1.137346 | 0.501141 | 2.3 | 3.89E-03 | 7.04E-03 |
| 125 | mir-3934(1)   | 0.000755 | 0.000338 | 2.3 | 8.97E-02 | 1.19E-01 |
| 126 | mir-138-1(2)  | 0.010283 | 0.004580 | 2.2 | 1.47E-02 | 2.31E-02 |
| 127 | mir-491(1)    | 0.003389 | 0.001570 | 2.2 | 8.29E-02 | 1.11E-01 |
| 128 | mir-1227(1)   | 0.000122 | 0.000064 | 2.1 | 3.16E-01 | 3.60E-01 |
| 129 | mir-874(1)    | 0.035322 | 0.017094 | 2.1 | 3.16E-02 | 4.66E-02 |
| 130 | mir-3909(1)   | 0.000316 | 0.000162 | 2.0 | 3.28E-01 | 3.71E-01 |
| 131 | mir-21(1)     | 5.540849 | 2.758412 | 2.0 | 8.64E-03 | 1.48E-02 |
| 132 | mir-204(1)    | 0.014918 | 0.007683 | 1.9 | 1.01E-01 | 1.32E-01 |
| 133 | mir-219-1(2)  | 0.002371 | 0.001217 | 1.9 | 2.95E-01 | 3.46E-01 |
| 134 | mir-34a(1)    | 0.069924 | 0.036352 | 1.9 | 1.11E-02 | 1.82E-02 |
| 135 | mir-1271(1)   | 0.008947 | 0.004676 | 1.9 | 4.52E-02 | 6.37E-02 |
| 136 | mir-3690-1(2) | 0.000173 | 0.000088 | 1.9 | 4.88E-01 | 5.35E-01 |
| 137 | mir-629(1)    | 0.019607 | 0.010656 | 1.8 | 8.08E-02 | 1.09E-01 |
| 138 | mir-3158(1)   | 0.000951 | 0.000526 | 1.8 | 3.02E-01 | 3.50E-01 |
| 139 | mir-4804(1)   | 0.000212 | 0.000117 | 1.8 | 4.40E-01 | 4.89E-01 |
| 140 | mir-103-1(2)  | 2.024626 | 1.246508 | 1.6 | 2.03E-01 | 2.46E-01 |
| 141 | mir-488(1)    | 0.006433 | 0.003959 | 1.6 | 3.40E-01 | 3.84E-01 |
| 142 | mir-33a(1)    | 0.044987 | 0.028281 | 1.6 | 9.87E-02 | 1.30E-01 |
| 143 | mir-3620(1)   | 0.000113 | 0.000072 | 1.6 | 5.53E-01 | 5.96E-01 |
| 144 | mir-423(2)    | 0.335153 | 0.213821 | 1.6 | 7.21E-02 | 9.89E-02 |
| 145 | mir-151(1)    | 0.455647 | 0.291741 | 1.6 | 1.91E-02 | 2.93E-02 |
| 146 | mir-33b(1)    | 0.007004 | 0.004609 | 1.5 | 3.89E-01 | 4.36E-01 |
| 147 | mir-1468(1)   | 0.000529 | 0.000356 | 1.5 | 5.36E-01 | 5.81E-01 |
| 148 | mir-330(1)    | 0.010765 | 0.007474 | 1.4 | 1.51E-01 | 1.94E-01 |
| 149 | mir-624(1)    | 0.000622 | 0.000440 | 1.4 | 6.18E-01 | 6.61E-01 |
| 150 | mir-3157(1)   | 0.000161 | 0.000105 | 1.4 | 6.71E-01 | 7.11E-01 |



|     | A            | B        | C        | D    | E        | F        |
|-----|--------------|----------|----------|------|----------|----------|
| 151 | mir-766(1)   | 0.001288 | 0.000925 | 1.4  | 5.00E-01 | 5.47E-01 |
| 152 | mir-339(1)   | 0.033328 | 0.023962 | 1.4  | 2.23E-01 | 2.66E-01 |
| 153 | mir-1292(1)  | 0.000638 | 0.000471 | 1.4  | 5.53E-01 | 5.96E-01 |
| 154 | mir-3659(1)  | 0.001251 | 0.000955 | 1.3  | 6.39E-01 | 6.80E-01 |
| 155 | mir-191(2)   | 0.543408 | 0.437943 | 1.2  | 2.09E-01 | 2.51E-01 |
| 156 | mir-101-1(2) | 0.971438 | 0.787835 | 1.2  | 4.54E-01 | 5.01E-01 |
| 157 | mir-579(1)   | 0.000225 | 0.000188 | 1.2  | 7.65E-01 | 8.00E-01 |
| 158 | mir-605(1)   | 0.000133 | 0.000112 | 1.2  | 7.80E-01 | 8.13E-01 |
| 159 | mir-155(1)   | 0.007480 | 0.006343 | 1.2  | 5.33E-01 | 5.81E-01 |
| 160 | mir-4690(1)  | 0.000105 | 0.000093 | 1.2  | 8.42E-01 | 8.64E-01 |
| 161 | mir-551b(1)  | 0.001914 | 0.001660 | 1.1  | 7.96E-01 | 8.25E-01 |
| 162 | mir-2277(1)  | 0.000551 | 0.000477 | 1.1  | 8.29E-01 | 8.54E-01 |
| 163 | mir-221(2)   | 1.245417 | 1.129882 | 1.1  | 6.39E-01 | 6.80E-01 |
| 164 | mir-30a(4)   | 1.602495 | 1.472763 | 1.1  | 7.58E-01 | 7.95E-01 |
| 165 | mir-331(1)   | 0.020949 | 0.019641 | 1.1  | 8.12E-01 | 8.39E-01 |
| 166 | mir-1295(1)  | 0.000168 | 0.000163 | 1.1  | 9.47E-01 | 9.60E-01 |
| 167 | mir-192(4)   | 0.039351 | 0.038657 | 1.0  | 9.48E-01 | 9.60E-01 |
| 168 | mir-486(1)   | 0.032160 | 0.031911 | 1.0  | 9.79E-01 | 9.85E-01 |
| 169 | mir-3145(1)  | 0.000057 | 0.000055 | 1.0  | 9.94E-01 | 9.97E-01 |
| 170 | mir-3120(1)  | 0.000000 | 0.000000 | 0.0  | 1.00E+00 | 1.00E+00 |
| 171 | mir-3064(1)  | 0.000214 | 0.000233 | -1.0 | 9.53E-01 | 9.62E-01 |
| 172 | mir-628(1)   | 0.001463 | 0.001594 | -1.1 | 8.49E-01 | 8.68E-01 |
| 173 | mir-590(1)   | 0.008055 | 0.008843 | -1.1 | 7.87E-01 | 8.18E-01 |
| 174 | mir-659(1)   | 0.000146 | 0.000144 | -1.1 | 8.89E-01 | 9.06E-01 |
| 175 | mir-1249(1)  | 0.000324 | 0.000431 | -1.3 | 7.35E-01 | 7.74E-01 |
| 176 | mir-625(1)   | 0.003440 | 0.004499 | -1.3 | 4.11E-01 | 4.59E-01 |
| 177 | mir-652(1)   | 0.028996 | 0.038397 | -1.3 | 2.97E-01 | 3.47E-01 |
| 178 | mir-140(1)   | 0.209190 | 0.278880 | -1.3 | 3.60E-01 | 4.05E-01 |
| 179 | mir-335(1)   | 0.080073 | 0.107719 | -1.3 | 3.05E-01 | 3.51E-01 |
| 180 | mir-186(1)   | 0.229444 | 0.312966 | -1.4 | 3.04E-01 | 3.51E-01 |

|     | A           | B        | C        | D    | E        | F        |
|-----|-------------|----------|----------|------|----------|----------|
| 181 | mir-499(1)  | 0.001725 | 0.002417 | -1.4 | 6.86E-01 | 7.25E-01 |
| 182 | mir-2110(1) | 0.002130 | 0.003113 | -1.5 | 1.92E-01 | 2.35E-01 |
| 183 | mir-197(1)  | 0.012405 | 0.019043 | -1.5 | 1.19E-01 | 1.53E-01 |
| 184 | mir-642(1)  | 0.000096 | 0.000167 | -1.5 | 5.98E-01 | 6.43E-01 |
| 185 | mir-627(1)  | 0.001983 | 0.003079 | -1.5 | 3.05E-01 | 3.51E-01 |
| 186 | mir-107(1)  | 0.047440 | 0.076610 | -1.6 | 8.06E-02 | 1.09E-01 |
| 187 | mir-141(2)  | 1.189800 | 1.946635 | -1.6 | 4.49E-01 | 4.98E-01 |
| 188 | mir-324(1)  | 0.026394 | 0.045216 | -1.7 | 1.12E-01 | 1.45E-01 |
| 189 | mir-375(1)  | 0.003628 | 0.006382 | -1.8 | 2.94E-01 | 3.46E-01 |
| 190 | mir-30b(2)  | 0.360819 | 0.640463 | -1.8 | 1.59E-02 | 2.49E-02 |
| 191 | mir-885(1)  | 0.000201 | 0.000359 | -1.8 | 4.82E-01 | 5.31E-01 |
| 192 | mir-576(1)  | 0.001909 | 0.003553 | -1.9 | 1.76E-01 | 2.19E-01 |
| 193 | mir-3605(1) | 0.000278 | 0.000534 | -1.9 | 3.08E-01 | 3.53E-01 |
| 194 | mir-708(1)  | 0.038876 | 0.077210 | -2.0 | 1.33E-02 | 2.13E-02 |
| 195 | mir-188(8)  | 0.068324 | 0.136409 | -2.0 | 2.16E-03 | 4.09E-03 |
| 196 | mir-95(1)   | 0.003690 | 0.007546 | -2.0 | 7.56E-02 | 1.03E-01 |
| 197 | mir-887(1)  | 0.005988 | 0.012395 | -2.1 | 5.62E-02 | 7.81E-02 |
| 198 | mir-378(1)  | 0.429653 | 0.899292 | -2.1 | 9.67E-03 | 1.60E-02 |
| 199 | mir-148b(1) | 0.192985 | 0.417506 | -2.2 | 6.71E-03 | 1.17E-02 |
| 200 | mir-185(1)  | 0.034733 | 0.075703 | -2.2 | 4.25E-03 | 7.65E-03 |
| 201 | mir-6720(1) | 0.000183 | 0.000376 | -2.2 | 3.19E-01 | 3.62E-01 |
| 202 | mir-342(1)  | 0.026870 | 0.061925 | -2.3 | 7.34E-05 | 2.08E-04 |
| 203 | mir-133b(2) | 0.000579 | 0.001304 | -2.3 | 2.97E-01 | 3.47E-01 |
| 204 | mir-3919(1) | 0.000000 | 0.000005 | -2.3 | 1.63E-01 | 2.06E-01 |
| 205 | mir-15a(4)  | 0.218334 | 0.523296 | -2.4 | 2.91E-02 | 4.30E-02 |
| 206 | mir-28(1)   | 0.078429 | 0.190600 | -2.4 | 4.65E-04 | 1.05E-03 |
| 207 | mir-671(1)  | 0.004297 | 0.010682 | -2.5 | 1.85E-02 | 2.86E-02 |
| 208 | mir-148a(1) | 1.774467 | 4.426584 | -2.5 | 1.92E-03 | 3.71E-03 |
| 209 | mir-3928(1) | 0.000084 | 0.000209 | -2.5 | 1.89E-01 | 2.33E-01 |
| 210 | mir-3912(1) | 0.000163 | 0.000452 | -2.6 | 2.08E-01 | 2.51E-01 |

|     | A             | B        | C        | D    | E        | F        |
|-----|---------------|----------|----------|------|----------|----------|
| 211 | mir-4636(1)   | 0.000127 | 0.000336 | -2.6 | 1.91E-01 | 2.35E-01 |
| 212 | mir-320(1)    | 0.252893 | 0.665174 | -2.6 | 3.15E-04 | 7.43E-04 |
| 213 | mir-29a(4)    | 0.263311 | 0.698015 | -2.7 | 3.81E-02 | 5.49E-02 |
| 214 | mir-99b(3)    | 0.223276 | 0.617693 | -2.8 | 1.72E-05 | 5.73E-05 |
| 215 | mir-616(1)    | 0.000073 | 0.000176 | -2.8 | 1.92E-01 | 2.35E-01 |
| 216 | mir-584(1)    | 0.000414 | 0.001225 | -2.9 | 4.47E-02 | 6.35E-02 |
| 217 | mir-3193(1)   | 0.000000 | 0.000007 | -2.9 | 8.78E-02 | 1.16E-01 |
| 218 | mir-3613(1)   | 0.004153 | 0.012200 | -2.9 | 8.36E-04 | 1.79E-03 |
| 219 | mir-224(2)    | 0.038827 | 0.134475 | -3.5 | 1.96E-06 | 7.87E-06 |
| 220 | mir-3617(1)   | 0.000091 | 0.000373 | -3.5 | 1.88E-01 | 2.33E-01 |
| 221 | mir-218-1(3)  | 0.023478 | 0.084537 | -3.6 | 1.94E-05 | 6.20E-05 |
| 222 | mir-149(1)    | 0.007679 | 0.030756 | -4.0 | 3.10E-03 | 5.72E-03 |
| 223 | mir-200a(3)   | 0.134123 | 0.552975 | -4.1 | 1.27E-02 | 2.04E-02 |
| 224 | mir-574(1)    | 0.018232 | 0.075915 | -4.2 | 2.52E-06 | 9.88E-06 |
| 225 | mir-181c(2)   | 0.008084 | 0.034252 | -4.2 | 1.81E-05 | 5.86E-05 |
| 226 | mir-3155(1)   | 0.000000 | 0.000015 | -4.7 | 4.25E-02 | 6.07E-02 |
| 227 | mir-137(1)    | 0.000233 | 0.001172 | -4.9 | 1.55E-02 | 2.44E-02 |
| 228 | mir-210(1)    | 0.076018 | 0.375648 | -4.9 | 1.56E-04 | 3.98E-04 |
| 229 | mir-190a(1)   | 0.005695 | 0.028251 | -5.0 | 3.30E-05 | 1.03E-04 |
| 230 | mir-582(1)    | 0.000816 | 0.004212 | -5.0 | 6.34E-03 | 1.11E-02 |
| 231 | mir-450a-1(4) | 0.024000 | 0.128143 | -5.3 | 3.76E-05 | 1.16E-04 |
| 232 | mir-328(1)    | 0.000793 | 0.004495 | -5.6 | 7.89E-05 | 2.19E-04 |
| 233 | mir-3152(1)   | 0.000000 | 0.000020 | -5.9 | 1.40E-02 | 2.23E-02 |
| 234 | mir-26a-1(2)  | 0.660088 | 3.933767 | -6.0 | 4.02E-05 | 1.23E-04 |
| 235 | mir-3692(1)   | 0.000000 | 0.000021 | -6.0 | 9.12E-03 | 1.53E-02 |
| 236 | mir-4504(1)   | 0.000000 | 0.000028 | -6.2 | 1.45E-02 | 2.30E-02 |
| 237 | mir-132(2)    | 0.001216 | 0.008202 | -6.7 | 2.41E-04 | 5.89E-04 |
| 238 | mir-455(1)    | 0.012907 | 0.092868 | -7.2 | 7.05E-07 | 3.19E-06 |
| 239 | mir-3612(1)   | 0.000000 | 0.000035 | -7.2 | 3.58E-02 | 5.20E-02 |
| 240 | mir-570(1)    | 0.000114 | 0.000991 | -7.7 | 5.77E-03 | 1.02E-02 |

|     | A             | B        | C        | D     | E        | F        |
|-----|---------------|----------|----------|-------|----------|----------|
| 241 | mir-193a(5)   | 0.040027 | 0.316366 | -7.9  | 1.42E-08 | 9.41E-08 |
| 242 | mir-3146(1)   | 0.000000 | 0.000044 | -8.1  | 9.12E-03 | 1.53E-02 |
| 243 | mir-147(1)    | 0.000163 | 0.001446 | -8.4  | 8.95E-03 | 1.52E-02 |
| 244 | mir-153-1(2)  | 0.001259 | 0.011377 | -8.9  | 2.49E-04 | 6.03E-04 |
| 245 | mir-3619(1)   | 0.000000 | 0.000045 | -10.4 | 1.14E-03 | 2.33E-03 |
| 246 | mir-205(1)    | 0.165149 | 1.730184 | -10.5 | 1.59E-03 | 3.10E-03 |
| 247 | mir-208b(1)   | 0.000000 | 0.000048 | -10.6 | 1.63E-01 | 2.06E-01 |
| 248 | mir-4709(1)   | 0.000000 | 0.000041 | -10.6 | 1.29E-03 | 2.58E-03 |
| 249 | mir-3657(1)   | 0.000000 | 0.000041 | -11.0 | 2.34E-03 | 4.38E-03 |
| 250 | mir-3614(1)   | 0.000000 | 0.000053 | -11.7 | 2.84E-03 | 5.30E-03 |
| 251 | mir-22(1)     | 0.120616 | 1.419786 | -11.8 | 1.35E-07 | 7.11E-07 |
| 252 | mir-3942(1)   | 0.000000 | 0.000052 | -12.0 | 1.34E-03 | 2.67E-03 |
| 253 | mir-26b(1)    | 0.073691 | 0.901023 | -12.2 | 2.29E-09 | 2.01E-08 |
| 254 | mir-139(1)    | 0.001919 | 0.024784 | -12.9 | 3.46E-10 | 3.70E-09 |
| 255 | mir-4731(1)   | 0.000000 | 0.000061 | -13.9 | 2.02E-03 | 3.86E-03 |
| 256 | mir-135a-1(3) | 0.072593 | 1.097216 | -15.1 | 6.48E-13 | 1.67E-11 |
| 257 | mir-3173(1)   | 0.000000 | 0.000072 | -15.3 | 4.62E-03 | 8.27E-03 |
| 258 | mir-196a-1(3) | 0.006464 | 0.099951 | -15.5 | 6.03E-08 | 3.35E-07 |
| 259 | mir-1247(1)   | 0.000225 | 0.003620 | -15.5 | 1.70E-04 | 4.26E-04 |
| 260 | mir-4473(1)   | 0.000000 | 0.000070 | -16.2 | 3.09E-04 | 7.37E-04 |
| 261 | mir-675(1)    | 0.000337 | 0.005753 | -16.9 | 5.66E-04 | 1.25E-03 |
| 262 | mir-126(1)    | 0.065103 | 1.103312 | -16.9 | 8.07E-11 | 1.07E-09 |
| 263 | mir-4638(1)   | 0.000000 | 0.000085 | -18.2 | 8.09E-04 | 1.74E-03 |
| 264 | mir-338(1)    | 0.002253 | 0.041242 | -18.3 | 1.14E-07 | 6.24E-07 |
| 265 | mir-346(1)    | 0.000000 | 0.000087 | -18.7 | 7.66E-04 | 1.68E-03 |
| 266 | mir-23a(6)    | 0.449232 | 9.158310 | -20.4 | 4.68E-13 | 1.35E-11 |
| 267 | mir-181a-1(4) | 0.027796 | 0.595786 | -21.4 | 1.18E-11 | 2.33E-10 |
| 268 | mir-1976(1)   | 0.000000 | 0.000103 | -21.6 | 1.09E-04 | 2.96E-04 |
| 269 | mir-3136(1)   | 0.000000 | 0.000100 | -21.7 | 1.27E-04 | 3.37E-04 |
| 270 | mir-770(1)    | 0.000000 | 0.000099 | -22.7 | 3.43E-04 | 7.99E-04 |

|     | A            | B        | C        | D      | E        | F        |
|-----|--------------|----------|----------|--------|----------|----------|
| 271 | mir-122(1)   | 0.000000 | 0.000094 | -22.8  | 1.91E-04 | 4.72E-04 |
| 272 | mir-142(1)   | 0.008405 | 0.194757 | -23.1  | 1.56E-08 | 1.01E-07 |
| 273 | mir-4789(1)  | 0.000000 | 0.000097 | -23.3  | 9.50E-04 | 1.99E-03 |
| 274 | mir-1179(1)  | 0.000000 | 0.000101 | -24.1  | 1.16E-04 | 3.11E-04 |
| 275 | mir-146b(1)  | 0.006818 | 0.165459 | -24.2  | 7.75E-09 | 5.85E-08 |
| 276 | mir-3940(1)  | 0.000000 | 0.000107 | -24.8  | 9.59E-04 | 2.00E-03 |
| 277 | mir-1294(1)  | 0.000000 | 0.000115 | -26.1  | 1.63E-05 | 5.48E-05 |
| 278 | mir-506(11)  | 0.002043 | 0.057655 | -28.0  | 3.44E-06 | 1.31E-05 |
| 279 | mir-195(2)   | 0.019385 | 0.542734 | -28.0  | 3.77E-11 | 5.97E-10 |
| 280 | mir-4772(1)  | 0.000000 | 0.000131 | -29.0  | 1.81E-05 | 5.86E-05 |
| 281 | mir-146a(1)  | 0.006377 | 0.185724 | -29.1  | 1.27E-07 | 6.81E-07 |
| 282 | mir-1537(1)  | 0.000000 | 0.000132 | -30.2  | 1.33E-04 | 3.48E-04 |
| 283 | mir-2681(2)  | 0.000000 | 0.000163 | -36.2  | 2.54E-05 | 7.98E-05 |
| 284 | mir-1245(2)  | 0.000000 | 0.000161 | -37.3  | 9.92E-05 | 2.71E-04 |
| 285 | mir-424(2)   | 0.037686 | 1.437491 | -38.1  | 2.60E-12 | 5.49E-11 |
| 286 | mir-2114(1)  | 0.000000 | 0.000174 | -38.5  | 3.16E-04 | 7.43E-04 |
| 287 | mir-196b(1)  | 0.001470 | 0.060593 | -42.6  | 4.13E-04 | 9.42E-04 |
| 288 | mir-483(1)   | 0.000238 | 0.011713 | -50.4  | 2.26E-05 | 7.17E-05 |
| 289 | mir-934(1)   | 0.000000 | 0.000230 | -51.1  | 1.45E-04 | 3.74E-04 |
| 290 | mir-383(1)   | 0.000000 | 0.000241 | -51.4  | 1.37E-05 | 4.72E-05 |
| 291 | mir-150(1)   | 0.000447 | 0.023777 | -54.8  | 2.71E-07 | 1.34E-06 |
| 292 | mir-1-1(4)   | 0.005706 | 0.329325 | -57.6  | 4.84E-07 | 2.26E-06 |
| 293 | mir-134(43)  | 0.014264 | 0.849155 | -59.5  | 3.00E-14 | 1.90E-12 |
| 294 | mir-3194(1)  | 0.000000 | 0.000311 | -67.5  | 1.75E-06 | 7.18E-06 |
| 295 | mir-1255a(1) | 0.000000 | 0.000350 | -73.6  | 9.97E-07 | 4.45E-06 |
| 296 | mir-152(1)   | 0.005978 | 0.499666 | -83.6  | 1.80E-13 | 5.70E-12 |
| 297 | mir-208a(1)  | 0.000000 | 0.000452 | -93.7  | 2.91E-03 | 5.39E-03 |
| 298 | mir-216a(3)  | 0.000000 | 0.000477 | -104.6 | 1.15E-08 | 7.95E-08 |
| 299 | mir-513b(1)  | 0.000000 | 0.000544 | -119.9 | 9.28E-06 | 3.38E-05 |
| 300 | mir-514b(1)  | 0.000000 | 0.000628 | -137.8 | 1.80E-06 | 7.31E-06 |

|     | A             | B        | C         | D       | E        | F        |
|-----|---------------|----------|-----------|---------|----------|----------|
| 301 | mir-3910(1)   | 0.000000 | 0.000647  | -142.1  | 1.01E-05 | 3.63E-05 |
| 302 | mir-190b(1)   | 0.000000 | 0.000730  | -158.6  | 1.84E-08 | 1.17E-07 |
| 303 | mir-98(13)    | 0.068165 | 14.868133 | -218.1  | 1.53E-19 | 2.42E-17 |
| 304 | mir-513c(1)   | 0.000000 | 0.001057  | -230.2  | 1.71E-06 | 7.13E-06 |
| 305 | mir-199b(1)   | 0.004781 | 1.436779  | -299.8  | 7.36E-16 | 5.83E-14 |
| 306 | mir-10b(1)    | 0.002026 | 0.724261  | -361.8  | 4.25E-08 | 2.54E-07 |
| 307 | let-7i(1)     | 0.002948 | 1.353406  | -463.5  | 5.85E-14 | 2.65E-12 |
| 308 | mir-202(1)    | 0.000000 | 0.002705  | -581.7  | 9.76E-09 | 7.19E-08 |
| 309 | mir-143(2)    | 0.013066 | 9.717483  | -743.8  | 1.10E-13 | 3.88E-12 |
| 310 | mir-199a-1(3) | 0.003052 | 2.683622  | -880.8  | 5.10E-17 | 5.38E-15 |
| 311 | mir-511-1(2)  | 0.000000 | 0.004168  | -896.1  | 2.14E-11 | 3.56E-10 |
| 312 | mir-944(1)    | 0.000000 | 0.004338  | -938.1  | 4.22E-09 | 3.35E-08 |
| 313 | mir-10a(1)    | 0.000105 | 0.122253  | -1011.2 | 3.11E-10 | 3.52E-09 |
| 314 | mir-203(1)    | 0.004226 | 4.440840  | -1046.9 | 6.31E-09 | 4.88E-08 |
| 315 | mir-127(8)    | 0.000377 | 0.437495  | -1129.3 | 7.64E-10 | 7.57E-09 |
| 316 | mir-144(2)    | 0.001466 | 1.679495  | -1135.6 | 2.04E-11 | 3.56E-10 |
| 317 | mir-370(1)    | 0.000000 | 0.008046  | -1741.5 | 4.25E-11 | 6.12E-10 |
| 318 | mir-211(1)    | 0.000000 | 0.024324  | -5246.7 | 7.07E-13 | 1.67E-11 |
| 319 | mir-223(1)    | 0.000000 | 0.025329  | -5466.1 | 5.34E-14 | 2.65E-12 |

|   | A                                                                                                                                                          | B | C | D | E | F | G | H |
|---|------------------------------------------------------------------------------------------------------------------------------------------------------------|---|---|---|---|---|---|---|
| 1 | <b>SUPPLEMENTARY TABLE SIII</b>                                                                                                                            |   |   |   |   |   |   |   |
| 2 | <b>TABLE LEGEND</b>                                                                                                                                        |   |   |   |   |   |   |   |
| 3 |                                                                                                                                                            |   |   |   |   |   |   |   |
| 4 | <b>Sheet "mRNAs Propranolol-control":</b> mRNA sequencing data showing mRNAs differentially expressed in iPSCs after 72h propranolol treatment compared to |   |   |   |   |   |   |   |
| 5 |                                                                                                                                                            |   |   |   |   |   |   |   |
| 6 | <b>Sheet "Geneset Hallmark Propranolol":</b> Hallmark gene set analysis of differentially expressed genes after propranolol treatment of iPSCs             |   |   |   |   |   |   |   |
| 7 |                                                                                                                                                            |   |   |   |   |   |   |   |
| 8 | <b>Sheet "GeneSet C2 Propranolol":</b> Curated gene set analysis of differentially expressed genes after propranolol treatment of iPSCs                    |   |   |   |   |   |   |   |

| 1  | A               | B        | C                  | D         | E         | F        | G          | H       | I       | J       | K         | L       | M       |
|----|-----------------|----------|--------------------|-----------|-----------|----------|------------|---------|---------|---------|-----------|---------|---------|
| 2  | Gene            |          | Linear Fold Change | P Value   | FDR       | TestMean | TestStdDev | TestMin | TestMax | RefMean | RefStdDev | RefMin  | RefMax  |
| 3  | ENSG00000166535 | A2ML1    | -1.5               | 2.983E-05 | 0.0003322 | 1.859    | 0.354      | 1.497   | 2.204   | 2.830   | 0.254     | 2.559   | 3.062   |
| 4  | ENSG00000128274 | A4GALT   | -1.2               | 0.0227703 | 0.0698051 | 5.170    | 1.039      | 4.064   | 6.125   | 6.557   | 0.873     | 5.897   | 7.546   |
| 5  | ENSG00000094914 | AAAS     | -1.1               | 0.0682346 | 0.160709  | 39.346   | 2.025      | 37.881  | 41.657  | 43.036  | 0.810     | 42.186  | 43.798  |
| 6  | ENSG00000081760 | AACS     | 1.2                | 4.851E-06 | 7.248E-05 | 12.661   | 0.569      | 12.082  | 13.219  | 10.749  | 0.654     | 9.997   | 11.185  |
| 7  | ENSG00000109576 | AADAT    | 1.1                | 0.0317517 | 0.090283  | 16.416   | 0.590      | 16.008  | 17.093  | 14.905  | 1.055     | 14.008  | 16.067  |
| 8  | ENSG00000103591 | AAGAB    | 1.1                | 0.0002224 | 0.0017382 | 48.859   | 1.272      | 47.486  | 49.998  | 43.655  | 1.135     | 42.762  | 44.933  |
| 9  | ENSG00000090861 | AARS     | 1.4                | 2.55E-17  | 8.99E-15  | 256.831  | 3.320      | 254.489 | 260.630 | 181.171 | 4.665     | 175.808 | 184.288 |
| 10 | ENSG00000124608 | AARS2    | 1.2                | 8.01E-05  | 0.0007531 | 22.407   | 2.403      | 19.787  | 24.507  | 18.449  | 0.160     | 18.288  | 18.608  |
| 11 | ENSG00000157426 | AASDH    | -1.1               | 0.0614161 | 0.1481995 | 16.846   | 0.270      | 16.614  | 17.142  | 18.698  | 0.452     | 18.252  | 19.155  |
| 12 | ENSG00000149313 | AASDHPTT | -1.1               | 0.0524612 | 0.1318585 | 35.056   | 0.346      | 34.671  | 35.341  | 38.243  | 0.902     | 37.361  | 39.164  |
| 13 | ENSG00000275700 | AATF     | -1.1               | 0.0233914 | 0.071302  | 29.402   | 1.269      | 27.938  | 30.181  | 32.718  | 0.948     | 32.039  | 33.801  |
| 14 | ENSG00000165029 | ABCA1    | 1.5                | 3.239E-08 | 1.022E-06 | 14.785   | 2.050      | 13.060  | 17.052  | 10.379  | 0.701     | 9.851   | 11.175  |
| 15 | ENSG00000251595 | ABCA11P  | 1.4                | 0.0935161 | 0.2035045 | 1.239    | 0.115      | 1.111   | 1.335   | 0.900   | 0.234     | 0.668   | 1.137   |
| 16 | ENSG00000064687 | ABCA7    | -1.2               | 0.0011252 | 0.0064671 | 6.137    | 0.327      | 5.792   | 6.441   | 7.690   | 0.875     | 6.830   | 8.580   |
| 17 | ENSG00000135776 | ABCB10   | 1.2                | 0.0034686 | 0.0158168 | 13.024   | 1.005      | 11.953  | 13.946  | 11.130  | 0.697     | 10.470  | 11.859  |
| 18 | ENSG00000023839 | ABCC2    | -1.5               | 0.0368972 | 0.1006359 | 0.420    | 0.085      | 0.332   | 0.502   | 0.630   | 0.059     | 0.589   | 0.698   |
| 19 | ENSG00000114770 | ABCC5    | -1.1               | 0.0064568 | 0.02578   | 16.844   | 0.759      | 16.012  | 17.499  | 18.855  | 0.182     | 18.742  | 19.065  |
| 20 | ENSG00000006071 | ABCC8    | -1.6               | 0.0089419 | 0.0332777 | 0.467    | 0.126      | 0.327   | 0.571   | 0.763   | 0.225     | 0.542   | 0.992   |
| 21 | ENSG00000101986 | ABCD1    | 1.2                | 0.1004523 | 0.2138524 | 4.164    | 0.512      | 3.697   | 4.712   | 3.681   | 0.158     | 3.584   | 3.864   |
| 22 | ENSG00000117528 | ABCD3    | 1.1                | 0.0532598 | 0.1333112 | 23.403   | 0.530      | 22.832  | 23.878  | 22.391  | 0.823     | 21.480  | 23.083  |
| 23 | ENSG00000160179 | ABCG1    | -1.3               | 0.0028717 | 0.0135781 | 2.363    | 0.149      | 2.267   | 2.534   | 3.228   | 0.282     | 2.938   | 3.501   |
| 24 | ENSG00000118777 | ABCG2    | 1.8                | 1.946E-06 | 3.312E-05 | 2.588    | 0.363      | 2.225   | 2.950   | 1.492   | 0.073     | 1.409   | 1.549   |
| 27 | ENSG00000172350 | ABCG4    | -1.6               | 9.671E-05 | 0.000879  | 1.071    | 0.074      | 1.012   | 1.154   | 1.795   | 0.111     | 1.709   | 1.920   |
| 28 | ENSG00000100997 | ABHD12   | 1.1                | 0.0099553 | 0.0363189 | 33.376   | 0.076      | 33.305  | 33.456  | 30.414  | 2.881     | 27.693  | 33.433  |
| 29 | ENSG00000131969 | ABHD12B  | 1.3                | 0.001984  | 0.01011   | 6.581    | 0.922      | 5.841   | 7.614   | 5.290   | 0.257     | 5.117   | 5.585   |
| 30 | ENSG00000114779 | ABHD14B  | -1.3               | 0.0005265 | 0.0034921 | 6.716    | 0.418      | 6.457   | 7.198   | 9.034   | 0.352     | 8.764   | 9.433   |
| 31 | ENSG00000107362 | ABHD17B  | -1.2               | 0.0009131 | 0.0054184 | 48.086   | 3.439      | 44.509  | 51.369  | 56.991  | 3.985     | 52.641  | 60.467  |
| 32 | ENSG00000140526 | ABHD2    | -1.3               | 3.1E-08   | 9.819E-07 | 11.336   | 0.666      | 10.766  | 12.068  | 15.287  | 0.783     | 14.412  | 15.922  |
| 33 | ENSG00000158201 | ABHD3    | 1.2                | 0.0023697 | 0.0116509 | 7.736    | 0.395      | 7.372   | 8.156   | 6.377   | 0.653     | 5.660   | 6.936   |
| 34 | ENSG00000100439 | ABHD4    | 1.1                | 0.0054764 | 0.0226682 | 43.055   | 0.690      | 42.471  | 43.817  | 39.837  | 1.826     | 38.043  | 41.694  |
| 35 | ENSG00000127220 | ABHD8    | -1.3               | 0.0003116 | 0.0022774 | 10.588   | 0.840      | 10.094  | 11.558  | 14.380  | 1.776     | 12.611  | 16.162  |
| 36 | ENSG00000138443 | ABI2     | 1                  | 0.0978545 | 0.2100004 | 30.396   | 0.892      | 29.591  | 31.355  | 29.749  | 0.675     | 28.979  | 30.240  |
| 37 | ENSG00000097007 | ABL1     | -1.1               | 0.0964274 | 0.2078382 | 52.340   | 2.986      | 49.074  | 54.932  | 56.545  | 3.450     | 53.528  | 60.307  |
| 38 | ENSG00000099204 | ABLIM1   | 1.2                | 1.184E-06 | 2.183E-05 | 24.842   | 0.929      | 23.857  | 25.704  | 21.182  | 0.500     | 20.711  | 21.707  |
| 39 | ENSG00000159842 | ABR      | 1.1                | 0.0328926 | 0.0927187 | 18.761   | 1.675      | 16.884  | 20.106  | 17.616  | 0.975     | 16.562  | 18.486  |
| 40 | ENSG00000146386 | ABRACL   | 1.3                | 1.357E-10 | 8.564E-09 | 266.547  | 13.250     | 257.496 | 281.755 | 207.195 | 4.372     | 204.019 | 212.181 |
| 41 | ENSG00000114626 | ABTB1    | -1.2               | 0.0887778 | 0.196095  | 2.369    | 0.330      | 1.994   | 2.617   | 2.843   | 0.306     | 2.497   | 3.078   |
| 42 | ENSG00000060971 | ACAA1    | 1.2                | 0.0154201 | 0.0515925 | 8.138    | 0.494      | 7.713   | 8.680   | 7.218   | 0.212     | 7.069   | 7.461   |



|    | A               | B      | C    | D         | E         | F        | G       | H        | I        | J        | K      | L        | M        |
|----|-----------------|--------|------|-----------|-----------|----------|---------|----------|----------|----------|--------|----------|----------|
| 43 | ENSG00000167315 | ACAA2  | -1.1 | 0.0300284 | 0.086343  | 56.576   | 1.966   | 54.319   | 57.911   | 61.783   | 2.168  | 60.166   | 64.246   |
| 44 | ENSG00000278540 | ACACA  | 1.2  | 1.403E-06 | 2.519E-05 | 69.050   | 2.640   | 66.070   | 71.099   | 60.978   | 1.944  | 59.734   | 63.218   |
| 45 | ENSG00000111271 | ACAD10 | -1.1 | 0.1158662 | 0.2368151 | 8.072    | 0.295   | 7.853    | 8.408    | 8.885    | 0.484  | 8.540    | 9.439    |
| 46 | ENSG00000117054 | ACADM  | 1.1  | 0.0003695 | 0.0026159 | 38.944   | 1.080   | 37.877   | 40.037   | 34.783   | 1.314  | 33.287   | 35.748   |
| 47 | ENSG00000196177 | ACADSB | -1.2 | 0.0079275 | 0.0304209 | 7.555    | 0.433   | 7.251    | 8.051    | 8.938    | 0.281  | 8.615    | 9.126    |
| 48 | ENSG00000072778 | ACADVL | -1.1 | 0.0016155 | 0.0086054 | 52.598   | 1.427   | 51.601   | 54.233   | 59.753   | 1.613  | 58.385   | 61.531   |
| 49 | ENSG00000072818 | ACAP1  | -1.2 | 0.0051624 | 0.0216385 | 4.524    | 0.253   | 4.360    | 4.815    | 5.579    | 0.519  | 5.232    | 6.175    |
| 50 | ENSG00000114331 | ACAP2  | -1.1 | 0.0108499 | 0.0389521 | 20.329   | 0.928   | 19.300   | 21.102   | 22.799   | 0.893  | 22.168   | 23.822   |
| 51 | ENSG00000075239 | ACAT1  | 1.1  | 0.0022157 | 0.0109886 | 31.369   | 0.815   | 30.576   | 32.205   | 28.354   | 1.813  | 26.776   | 30.335   |
| 52 | ENSG00000120437 | ACAT2  | 1.8  | 8.20E-23  | 1.04E-19  | 127.746  | 0.647   | 127.120  | 128.412  | 71.437   | 1.779  | 69.488   | 72.972   |
| 53 | ENSG00000182827 | ACBD3  | -1.2 | 1.53E-06  | 2.713E-05 | 43.063   | 1.273   | 41.598   | 43.892   | 54.040   | 2.184  | 51.607   | 55.831   |
| 54 | ENSG00000181513 | ACBD4  | 1.2  | 0.0126301 | 0.0439488 | 10.920   | 0.810   | 10.010   | 11.561   | 9.485    | 0.412  | 9.016    | 9.788    |
| 55 | ENSG00000230124 | ACBD6  | 1.2  | 4.987E-05 | 0.0005121 | 23.123   | 0.264   | 22.819   | 23.284   | 20.235   | 0.666  | 19.839   | 21.004   |
| 56 | ENSG00000176244 | ACBD7  | 1.2  | 0.0004419 | 0.00302   | 54.306   | 1.391   | 53.307   | 55.894   | 45.698   | 3.719  | 41.919   | 49.353   |
| 57 | ENSG00000110455 | ACCS   | 1.4  | 0.0002236 | 0.001746  | 3.907    | 0.121   | 3.776    | 4.015    | 2.867    | 0.258  | 2.635    | 3.145    |
| 58 | ENSG00000177076 | ACER2  | -1.3 | 0.0006481 | 0.0041291 | 10.989   | 0.779   | 10.331   | 11.850   | 14.332   | 1.047  | 13.184   | 15.235   |
| 59 | ENSG00000078124 | ACER3  | 1.3  | 5.347E-06 | 7.864E-05 | 10.183   | 0.132   | 10.063   | 10.324   | 8.240    | 0.493  | 7.848    | 8.793    |
| 60 | ENSG00000087085 | ACHE   | 1.6  | 0.0003606 | 0.0025613 | 3.162    | 0.598   | 2.613    | 3.799    | 2.053    | 0.310  | 1.707    | 2.306    |
| 61 | ENSG00000100813 | ACIN1  | -1.1 | 0.0200484 | 0.0631588 | 105.258  | 2.075   | 103.627  | 107.593  | 114.570  | 5.646  | 108.394  | 119.466  |
| 62 | ENSG00000144476 | ACKR3  | -2.6 | 0.0031158 | 0.014533  | 0.284    | 0.164   | 0.132    | 0.458    | 0.774    | 0.119  | 0.665    | 0.900    |
| 63 | ENSG00000131473 | ACLY   | 1.2  | 1.784E-10 | 1.093E-08 | 247.298  | 8.297   | 237.754  | 252.803  | 202.396  | 8.338  | 193.662  | 210.271  |
| 64 | ENSG00000122729 | ACO1   | 1.1  | 0.0012158 | 0.0068701 | 48.319   | 2.674   | 46.131   | 51.299   | 44.116   | 2.273  | 42.797   | 46.742   |
| 65 | ENSG00000184227 | ACOT1  | 1.3  | 0.0154302 | 0.0516058 | 5.587    | 0.221   | 5.333    | 5.725    | 4.336    | 0.556  | 3.698    | 4.714    |
| 66 | ENSG00000112304 | ACOT13 | 1.1  | 0.0166099 | 0.054665  | 48.758   | 1.075   | 47.610   | 49.741   | 45.903   | 2.226  | 43.709   | 48.159   |
| 67 | ENSG00000097021 | ACOT7  | 1.1  | 0.060471  | 0.1465252 | 59.971   | 1.503   | 58.285   | 61.170   | 57.718   | 0.159  | 57.578   | 57.891   |
| 68 | ENSG00000161533 | ACOX1  | -1.2 | 1.315E-05 | 0.0001685 | 9.968    | 0.574   | 9.550    | 10.622   | 12.616   | 0.781  | 11.878   | 13.434   |
| 70 | ENSG00000168306 | ACOX2  | 1.5  | 0.007539  | 0.0292044 | 1.522    | 0.040   | 1.493    | 1.569    | 1.001    | 0.329  | 0.778    | 1.378    |
| 71 | ENSG00000087008 | ACOX3  | 1.3  | 0.0040362 | 0.0178985 | 6.121    | 0.806   | 5.191    | 6.607    | 4.927    | 0.182  | 4.773    | 5.128    |
| 72 | ENSG00000153093 | ACOXL  | -1.7 | 3.095E-08 | 9.819E-07 | 3.195    | 0.208   | 3.007    | 3.419    | 5.475    | 0.408  | 5.026    | 5.824    |
| 73 | ENSG00000102575 | ACP5   | 1.3  | 0.0001775 | 0.001451  | 9.298    | 0.356   | 9.053    | 9.707    | 7.084    | 0.409  | 6.614    | 7.354    |
| 74 | ENSG00000014257 | ACPP   | -1.8 | 0.0088877 | 0.0331314 | 0.459    | 0.197   | 0.246    | 0.634    | 0.837    | 0.048  | 0.783    | 0.876    |
| 75 | ENSG00000111644 | ACRBP  | -1.8 | 0.0007299 | 0.0045219 | 1.303    | 0.513   | 0.728    | 1.714    | 2.428    | 0.184  | 2.255    | 2.622    |
| 76 | ENSG00000103740 | ACSBG1 | 1.4  | 0.0080142 | 0.0306385 | 1.285    | 0.279   | 0.987    | 1.539    | 0.926    | 0.155  | 0.750    | 1.045    |
| 77 | ENSG00000151726 | ACSL1  | 1.5  | 8.766E-08 | 2.431E-06 | 6.882    | 0.640   | 6.418    | 7.612    | 4.607    | 0.019  | 4.594    | 4.629    |
| 78 | ENSG00000123983 | ACSL3  | 1.4  | 1.45E-13  | 1.91E-11  | 93.516   | 2.577   | 90.749   | 95.847   | 70.034   | 0.750  | 69.220   | 70.696   |
| 79 | ENSG00000068366 | ACSL4  | 1.2  | 5.871E-09 | 2.353E-07 | 77.828   | 2.715   | 75.201   | 80.623   | 63.896   | 2.756  | 60.716   | 65.584   |
| 80 | ENSG00000005187 | ACSM3  | -1.2 | 0.0174312 | 0.0566296 | 4.336    | 0.531   | 3.907    | 4.930    | 5.246    | 0.330  | 4.918    | 5.579    |
| 81 | ENSG00000131069 | ACSS2  | 2.5  | 4.00E-22  | 3.56E-19  | 30.546   | 2.709   | 27.418   | 32.154   | 12.419   | 0.308  | 12.141   | 12.750   |
| 82 | ENSG00000143632 | ACTA1  | 2.4  | 4.932E-09 | 2.024E-07 | 11.789   | 1.676   | 10.370   | 13.638   | 5.042    | 0.928  | 4.259    | 6.068    |
| 83 | ENSG00000107796 | ACTA2  | 1.5  | 3.29E-05  | 0.0003597 | 7.992    | 1.366   | 6.558    | 9.277    | 5.351    | 0.796  | 4.436    | 5.888    |
| 84 | ENSG00000075624 | ACTB   | 1.2  | 8.017E-06 | 0.0001105 | 3739.278 | 287.998 | 3406.942 | 3915.806 | 3254.683 | 75.791 | 3177.188 | 3328.646 |
| 85 | ENSG00000213763 | ACTBP2 | 1.2  | 0.0044127 | 0.0192002 | 38.723   | 5.038   | 32.934   | 42.122   | 32.679   | 1.794  | 31.208   | 34.678   |
| 86 | ENSG00000159251 | ACTC1  | 1.8  | 0.0006799 | 0.0042781 | 14.739   | 3.128   | 11.219   | 17.198   | 8.271    | 0.645  | 7.599    | 8.886    |

|     | A               | B        | C    | D         | E         | F        | G       | H        | I        | J        | K      | L        | M        |
|-----|-----------------|----------|------|-----------|-----------|----------|---------|----------|----------|----------|--------|----------|----------|
| 88  | ENSG00000184009 | ACTG1    | 1.1  | 0.0248949 | 0.0747333 | 2903.197 | 212.986 | 2672.042 | 3091.497 | 2717.444 | 76.481 | 2644.448 | 2796.989 |
| 89  | ENSG00000163017 | ACTG2    | 1.4  | 0.0186251 | 0.0595814 | 2.760    | 0.273   | 2.479    | 3.024    | 2.052    | 0.751  | 1.354    | 2.846    |
| 90  | ENSG00000136518 | ACTL6A   | -1.1 | 0.0173977 | 0.0565752 | 63.936   | 2.458   | 61.588   | 66.490   | 70.549   | 2.838  | 67.275   | 72.305   |
| 91  | ENSG00000077080 | ACTL6B   | -1.9 | 0.0034654 | 0.0158109 | 0.723    | 0.095   | 0.618    | 0.803    | 1.427    | 0.273  | 1.113    | 1.607    |
| 92  | ENSG00000117148 | ACTL8    | -1.9 | 0.0716255 | 0.1667449 | 0.425    | 0.395   | 0.158    | 0.879    | 0.821    | 0.300  | 0.627    | 1.166    |
| 93  | ENSG00000072110 | ACTN1    | 1.2  | 2.419E-09 | 1.074E-07 | 89.429   | 3.853   | 85.149   | 92.620   | 73.575   | 4.137  | 70.996   | 78.347   |
| 95  | ENSG00000248746 | ACTN3    | -1.7 | 1.59E-11  | 1.274E-09 | 10.882   | 1.062   | 9.655    | 11.510   | 19.262   | 1.014  | 18.174   | 20.180   |
| 96  | ENSG00000130402 | ACTN4    | 1.3  | 7.72E-11  | 5.12E-09  | 189.263  | 5.172   | 183.793  | 194.075  | 152.706  | 6.031  | 148.359  | 159.592  |
| 97  | ENSG00000138107 | ACTR1A   | -1.1 | 0.0130056 | 0.0450378 | 70.635   | 0.856   | 69.648   | 71.163   | 77.862   | 2.593  | 76.282   | 80.854   |
| 98  | ENSG00000115091 | ACTR3    | 1.2  | 1.16E-06  | 2.15E-05  | 45.837   | 0.616   | 45.363   | 46.533   | 40.326   | 0.434  | 39.875   | 40.742   |
| 99  | ENSG00000133627 | ACTR3B   | -1.2 | 0.0096617 | 0.0354312 | 10.411   | 0.547   | 10.086   | 11.043   | 12.276   | 1.100  | 11.099   | 13.277   |
| 100 | ENSG00000114739 | ACVR2B   | -1.1 | 0.0041817 | 0.0183986 | 31.614   | 1.080   | 30.525   | 32.685   | 35.075   | 1.320  | 33.972   | 36.537   |
| 101 | ENSG00000196839 | ADA      | -1.1 | 0.0629648 | 0.1512676 | 20.593   | 2.870   | 17.970   | 23.658   | 23.413   | 0.825  | 22.646   | 24.286   |
| 102 | ENSG00000093072 | ADA2     | -1.1 | 0.0160529 | 0.0533195 | 9.980    | 0.243   | 9.735    | 10.221   | 11.563   | 0.934  | 10.718   | 12.566   |
| 103 | ENSG00000168803 | ADAL     | -1.1 | 0.0525291 | 0.13199   | 8.288    | 0.637   | 7.738    | 8.986    | 9.644    | 1.278  | 8.506    | 11.027   |
| 104 | ENSG00000137845 | ADAM10   | 1.1  | 0.0515425 | 0.1299358 | 34.312   | 1.470   | 33.385   | 36.007   | 33.205   | 0.431  | 32.937   | 33.701   |
| 105 | ENSG00000148848 | ADAM12   | 3    | 0.0111491 | 0.0397732 | 0.115    | 0.077   | 0.030    | 0.180    | 0.038    | 0.024  | 0.016    | 0.063    |
| 106 | ENSG00000135074 | ADAM19   | 1.3  | 4.047E-05 | 0.0004302 | 9.129    | 0.998   | 8.413    | 10.269   | 7.402    | 0.159  | 7.257    | 7.572    |
| 107 | ENSG00000008277 | ADAM22   | 1.1  | 0.0015559 | 0.0083378 | 9.005    | 0.046   | 8.962    | 9.053    | 8.061    | 0.166  | 7.880    | 8.205    |
| 108 | ENSG00000114948 | ADAM23   | 1.1  | 0.0046183 | 0.0198824 | 15.029   | 1.328   | 13.597   | 16.221   | 13.418   | 0.430  | 13.036   | 13.884   |
| 109 | ENSG00000042980 | ADAM28   | -1.7 | 0.0367003 | 0.1003582 | 0.185    | 0.047   | 0.158    | 0.239    | 0.325    | 0.072  | 0.249    | 0.393    |
| 110 | ENSG00000149451 | ADAM33   | -1.3 | 0.014292  | 0.048636  | 2.666    | 0.101   | 2.558    | 2.759    | 3.404    | 0.557  | 2.889    | 3.994    |
| 111 | ENSG00000151651 | ADAM8    | -1.2 | 0.0215321 | 0.0668329 | 2.923    | 0.133   | 2.774    | 3.029    | 3.679    | 0.274  | 3.411    | 3.959    |
| 112 | ENSG00000168615 | ADAM9    | 1.3  | 3.965E-07 | 8.858E-06 | 23.710   | 0.687   | 23.017   | 24.390   | 18.731   | 0.881  | 17.896   | 19.651   |
| 113 | ENSG00000154734 | ADAMTS1  | 1.2  | 0.0214057 | 0.0664774 | 4.559    | 0.411   | 4.121    | 4.936    | 3.997    | 0.414  | 3.676    | 4.464    |
| 114 | ENSG00000151388 | ADAMTS12 | 1.2  | 0.00606   | 0.0245609 | 8.095    | 0.446   | 7.580    | 8.365    | 7.125    | 0.907  | 6.115    | 7.870    |
| 115 | ENSG00000160323 | ADAMTS13 | -1.3 | 0.0085189 | 0.0320391 | 3.338    | 0.407   | 2.976    | 3.779    | 4.268    | 0.144  | 4.122    | 4.411    |
| 116 | ENSG00000138316 | ADAMTS14 | 1.5  | 0.0008986 | 0.0053478 | 2.643    | 0.600   | 1.990    | 3.168    | 1.771    | 0.202  | 1.647    | 2.004    |
| 117 | ENSG00000145536 | ADAMTS16 | 1.4  | 3.752E-07 | 8.462E-06 | 9.320    | 0.796   | 8.411    | 9.897    | 6.688    | 0.460  | 6.225    | 7.145    |
| 118 | ENSG00000087116 | ADAMTS2  | -1.3 | 0.0009385 | 0.0055499 | 2.434    | 0.434   | 2.081    | 2.920    | 3.343    | 0.107  | 3.221    | 3.423    |
| 119 | ENSG00000173157 | ADAMTS20 | -1.1 | 0.0216609 | 0.067134  | 5.794    | 0.261   | 5.493    | 5.953    | 6.773    | 0.614  | 6.069    | 7.190    |
| 120 | ENSG00000156140 | ADAMTS3  | -1.4 | 0.0001924 | 0.001548  | 3.099    | 0.213   | 2.964    | 3.344    | 4.345    | 0.295  | 4.006    | 4.537    |
| 122 | ENSG00000158859 | ADAMTS4  | -1.4 | 1.369E-06 | 2.474E-05 | 4.027    | 0.133   | 3.893    | 4.158    | 5.755    | 0.354  | 5.441    | 6.139    |

|     | A               | B        | C    | D         | E         | F       | G     | H       | I       | J       | K     | L       | M       |
|-----|-----------------|----------|------|-----------|-----------|---------|-------|---------|---------|---------|-------|---------|---------|
| 123 | ENSG00000049192 | ADAMTS6  | -1.6 | 6.605E-05 | 0.0006443 | 1.164   | 0.131 | 1.017   | 1.270   | 1.861   | 0.042 | 1.813   | 1.890   |
| 124 | ENSG00000136378 | ADAMTS7  | -1.3 | 1.42E-06  | 2.547E-05 | 22.596  | 0.571 | 22.007  | 23.148  | 28.919  | 3.010 | 26.606  | 32.322  |
| 125 | ENSG00000134917 | ADAMTS8  | -1.7 | 8.831E-07 | 1.723E-05 | 2.698   | 0.602 | 2.319   | 3.393   | 4.623   | 0.264 | 4.391   | 4.910   |
| 126 | ENSG00000197859 | ADAMTSL2 | -1.4 | 0.0085088 | 0.0320155 | 1.415   | 0.086 | 1.326   | 1.497   | 1.986   | 0.057 | 1.927   | 2.040   |
| 127 | ENSG00000143382 | ADAMTSL4 | -1.2 | 0.0758814 | 0.1739779 | 2.771   | 0.217 | 2.527   | 2.938   | 3.302   | 0.242 | 3.161   | 3.581   |
| 128 | ENSG00000185736 | ADARB2   | -1.2 | 0.0154367 | 0.0516073 | 1.592   | 0.151 | 1.460   | 1.757   | 2.000   | 0.243 | 1.746   | 2.231   |
| 129 | ENSG00000063761 | ADCK1    | 1.4  | 0.0001572 | 0.0013087 | 6.258   | 0.763 | 5.581   | 7.086   | 4.727   | 0.390 | 4.295   | 5.053   |
| 130 | ENSG00000164742 | ADCY1    | -1.2 | 0.0002159 | 0.0016946 | 9.266   | 0.283 | 9.068   | 9.591   | 11.080  | 0.837 | 10.213  | 11.883  |
| 131 | ENSG00000161912 | ADCY10P1 | -1.2 | 0.0240414 | 0.0727263 | 5.898   | 0.594 | 5.294   | 6.481   | 6.960   | 0.352 | 6.628   | 7.328   |
| 132 | ENSG00000138031 | ADCY3    | 1.2  | 0.0012838 | 0.007166  | 15.699  | 0.728 | 14.891  | 16.305  | 13.690  | 1.032 | 12.562  | 14.587  |
| 133 | ENSG00000173175 | ADCY5    | -1.4 | 2.749E-07 | 6.512E-06 | 5.427   | 0.505 | 5.025   | 5.994   | 7.664   | 0.430 | 7.411   | 8.161   |
| 134 | ENSG00000155897 | ADCY8    | 1.7  | 0.0001062 | 0.0009471 | 4.065   | 1.071 | 3.399   | 5.300   | 2.489   | 0.438 | 2.184   | 2.991   |
| 135 | ENSG00000148700 | ADD3     | 1.1  | 0.0674515 | 0.1593752 | 95.018  | 2.764 | 91.937  | 97.281  | 92.281  | 3.986 | 87.728  | 95.142  |
| 136 | ENSG00000152990 | ADGRA3   | 1.3  | 6.156E-09 | 2.45E-07  | 30.398  | 0.527 | 29.802  | 30.802  | 24.659  | 0.706 | 23.878  | 25.252  |
| 137 | ENSG00000181790 | ADGRB1   | -1.1 | 0.0802632 | 0.1817258 | 3.175   | 0.192 | 2.991   | 3.374   | 3.687   | 0.456 | 3.199   | 4.103   |
| 138 | ENSG00000121753 | ADGRB2   | -1.2 | 0.0087967 | 0.0328645 | 7.500   | 0.532 | 6.891   | 7.876   | 8.898   | 0.763 | 8.306   | 9.760   |
| 139 | ENSG00000205336 | ADGRG1   | -1.4 | 0.0262792 | 0.0778525 | 0.741   | 0.103 | 0.631   | 0.836   | 1.026   | 0.218 | 0.809   | 1.246   |
| 140 | ENSG00000173698 | ADGRG2   | 1.2  | 0.0002684 | 0.0020233 | 12.474  | 1.135 | 11.181  | 13.307  | 10.702  | 0.440 | 10.222  | 11.087  |
| 141 | ENSG00000182885 | ADGRG3   | -1.5 | 0.0300364 | 0.0863514 | 0.771   | 0.111 | 0.665   | 0.887   | 1.217   | 0.189 | 1.026   | 1.403   |
| 142 | ENSG00000159618 | ADGRG5   | 1.3  | 0.0377434 | 0.1022956 | 1.569   | 0.175 | 1.438   | 1.767   | 1.245   | 0.200 | 1.016   | 1.380   |
| 143 | ENSG00000112414 | ADGRG6   | 1.4  | 0.0002037 | 0.0016182 | 2.559   | 0.263 | 2.267   | 2.778   | 1.837   | 0.327 | 1.556   | 2.197   |
| 144 | ENSG00000072071 | ADGRL1   | -1.1 | 0.0011269 | 0.0064694 | 37.997  | 1.253 | 36.776  | 39.281  | 43.359  | 2.189 | 41.284  | 45.646  |
| 145 | ENSG00000117114 | ADGRL2   | -1.2 | 3.195E-06 | 5.031E-05 | 73.012  | 2.781 | 70.611  | 76.060  | 87.023  | 4.279 | 83.198  | 91.644  |
| 146 | ENSG00000162618 | ADGRL4   | 1.7  | 0.0724929 | 0.1682779 | 3.850   | 2.242 | 2.330   | 6.425   | 2.357   | 0.082 | 2.297   | 2.451   |
| 147 | ENSG00000164199 | ADGRV1   | -1.1 | 0.0916263 | 0.2009173 | 7.486   | 0.213 | 7.251   | 7.665   | 8.079   | 0.206 | 7.861   | 8.270   |
| 148 | ENSG00000197894 | ADH5     | 1.1  | 0.013485  | 0.046356  | 167.901 | 1.411 | 166.564 | 169.376 | 160.704 | 3.037 | 158.021 | 164.002 |
| 149 | ENSG00000182551 | ADI1     | 1.2  | 0.0007624 | 0.0046768 | 17.931  | 0.608 | 17.230  | 18.310  | 15.469  | 2.074 | 13.938  | 17.829  |
| 150 | ENSG0000006831  | ADIPOR2  | 1.2  | 2.417E-05 | 0.000279  | 34.238  | 0.798 | 33.332  | 34.836  | 30.002  | 1.342 | 29.016  | 31.530  |
| 151 | ENSG00000156110 | ADK      | 1.1  | 0.0043795 | 0.0190805 | 30.724  | 1.634 | 29.325  | 32.520  | 27.650  | 1.113 | 26.469  | 28.680  |
| 152 | ENSG00000148926 | ADM      | 1.7  | 1.62E-14  | 2.84E-12  | 108.195 | 6.202 | 101.961 | 114.365 | 64.116  | 5.294 | 59.729  | 69.997  |
| 153 | ENSG00000128165 | ADM2     | 1.9  | 1.50E-12  | 1.591E-10 | 12.688  | 0.741 | 12.160  | 13.535  | 6.898   | 0.576 | 6.283   | 7.425   |
| 154 | ENSG00000101126 | ADNP     | -1.1 | 0.0004405 | 0.0030129 | 70.556  | 1.856 | 68.808  | 72.503  | 79.798  | 0.500 | 79.249  | 80.227  |
| 155 | ENSG00000259456 | ADNP-AS1 | 1.6  | 0.075818  | 0.173896  | 2.129   | 0.917 | 1.593   | 3.187   | 1.321   | 0.277 | 1.005   | 1.518   |
| 156 | ENSG00000101544 | ADNP2    | -1.1 | 0.0001008 | 0.0009095 | 37.891  | 1.205 | 36.507  | 38.709  | 44.154  | 1.616 | 42.961  | 45.993  |
| 157 | ENSG00000128271 | ADORA2A  | -1.5 | 0.0545281 | 0.1357425 | 0.483   | 0.083 | 0.387   | 0.533   | 0.747   | 0.064 | 0.704   | 0.821   |
| 158 | ENSG00000170425 | ADORA2B  | 1.3  | 0.0248862 | 0.0747333 | 4.337   | 0.443 | 4.054   | 4.847   | 3.481   | 0.307 | 3.127   | 3.664   |
| 159 | ENSG00000159322 | ADPGK    | 1.3  | 7.165E-08 | 2.023E-06 | 17.085  | 1.386 | 15.484  | 17.885  | 12.984  | 0.496 | 12.526  | 13.511  |
| 160 | ENSG00000170222 | ADPRM    | -1.2 | 0.1087028 | 0.2265775 | 9.540   | 0.778 | 8.749   | 10.305  | 11.204  | 1.831 | 9.375   | 13.037  |

|     | A               | B          | C    | D         | E         | F       | G     | H       | I       | J       | K     | L       | M       |
|-----|-----------------|------------|------|-----------|-----------|---------|-------|---------|---------|---------|-------|---------|---------|
| 161 | ENSG00000150594 | ADRA2A     | -1.8 | 3.032E-07 | 7.074E-06 | 2.439   | 0.116 | 2.307   | 2.525   | 4.565   | 0.115 | 4.456   | 4.686   |
| 162 | ENSG00000239900 | ADSL       | 1.1  | 0.0876766 | 0.1942714 | 7.158   | 0.286 | 6.851   | 7.417   | 6.643   | 0.437 | 6.243   | 7.109   |
| 163 | ENSG00000035687 | ADSS       | 1.1  | 0.0551393 | 0.1369413 | 100.132 | 7.909 | 92.557  | 108.337 | 96.283  | 1.608 | 95.051  | 98.102  |
| 164 | ENSG00000185100 | ADSSL1     | -1.2 | 0.0027602 | 0.0132021 | 5.925   | 0.244 | 5.650   | 6.114   | 7.412   | 0.220 | 7.261   | 7.664   |
| 165 | ENSG00000106624 | AEBP1      | 1.1  | 0.0049144 | 0.020868  | 20.694  | 0.638 | 20.145  | 21.394  | 18.530  | 0.740 | 17.750  | 19.222  |
| 166 | ENSG00000139154 | AEBP2      | -1.1 | 0.0059004 | 0.0240816 | 45.622  | 2.347 | 43.005  | 47.538  | 51.326  | 3.080 | 49.364  | 54.876  |
| 167 | ENSG00000181026 | AEN        | -1.1 | 3.498E-05 | 0.000379  | 77.449  | 3.092 | 74.839  | 80.864  | 90.982  | 4.879 | 85.624  | 95.170  |
| 168 | ENSG00000104964 | AES        | -1.3 | 7.542E-08 | 2.12E-06  | 37.888  | 2.168 | 35.448  | 39.594  | 48.861  | 3.532 | 45.202  | 52.251  |
| 169 | ENSG00000196526 | AFAP1      | 1.2  | 0.0044229 | 0.0192206 | 7.388   | 0.443 | 7.051   | 7.890   | 6.559   | 0.404 | 6.159   | 6.966   |
| 170 | ENSG00000169129 | AFAP1L2    | -1.3 | 0.0089319 | 0.0332525 | 2.192   | 0.200 | 1.965   | 2.342   | 2.894   | 0.116 | 2.817   | 3.027   |
| 171 | ENSG00000130396 | AFDN       | -1.1 | 0.0004039 | 0.0028141 | 65.567  | 1.488 | 64.198  | 67.151  | 73.603  | 0.654 | 73.184  | 74.357  |
| 172 | ENSG00000198221 | AFDN-AS1   | -1.3 | 0.0047271 | 0.0202661 | 6.001   | 0.624 | 5.376   | 6.623   | 8.001   | 1.088 | 6.783   | 8.876   |
| 173 | ENSG00000172493 | AFF1       | 1.1  | 1.876E-05 | 0.0002249 | 34.499  | 0.724 | 33.814  | 35.257  | 30.724  | 0.929 | 29.944  | 31.752  |
| 174 | ENSG00000155966 | AFF2       | -1.2 | 0.0002843 | 0.002121  | 4.004   | 0.141 | 3.911   | 4.167   | 5.034   | 0.210 | 4.802   | 5.211   |
| 175 | ENSG00000072364 | AFF4       | 1.1  | 0.0508345 | 0.1286686 | 44.089  | 1.407 | 42.479  | 45.076  | 42.531  | 1.293 | 41.602  | 44.008  |
| 176 | ENSG00000135537 | AFG1L      | 1.2  | 0.0567313 | 0.1396036 | 2.324   | 0.333 | 1.975   | 2.638   | 2.005   | 0.249 | 1.718   | 2.150   |
| 177 | ENSG00000183077 | AFMID      | -1.3 | 9.043E-07 | 1.762E-05 | 13.177  | 0.515 | 12.587  | 13.540  | 17.979  | 0.736 | 17.149  | 18.552  |
| 178 | ENSG00000081051 | AFP        | -1.4 | 0.1123298 | 0.2317861 | 0.576   | 0.094 | 0.498   | 0.680   | 0.832   | 0.056 | 0.768   | 0.871   |
| 179 | ENSG00000119844 | AFTPH      | -1.1 | 0.038915  | 0.1046207 | 15.520  | 0.695 | 14.751  | 16.103  | 17.450  | 1.097 | 16.726  | 18.713  |
| 180 | ENSG00000038002 | AGA        | 1.2  | 0.0300213 | 0.0863374 | 8.344   | 0.440 | 7.838   | 8.633   | 7.166   | 1.010 | 6.114   | 8.127   |
| 181 | ENSG00000157985 | AGAP1      | -1.1 | 0.0648106 | 0.1544339 | 10.907  | 0.299 | 10.717  | 11.251  | 12.006  | 0.745 | 11.232  | 12.717  |
| 182 | ENSG00000135439 | AGAP2      | 1.7  | 1.019E-05 | 0.0001356 | 2.707   | 0.475 | 2.214   | 3.162   | 1.668   | 0.062 | 1.616   | 1.736   |
| 183 | ENSG00000204149 | AGAP6      | -1.1 | 0.1241312 | 0.2491905 | 13.166  | 0.327 | 12.790  | 13.372  | 14.696  | 1.155 | 13.531  | 15.840  |
| 184 | ENSG00000204172 | AGAP9      | -1.1 | 0.0980667 | 0.210278  | 8.233   | 1.079 | 7.312   | 9.420   | 9.696   | 1.080 | 8.948   | 10.935  |
| 185 | ENSG00000204305 | AGER       | 1.2  | 0.1128957 | 0.2325424 | 9.606   | 0.873 | 8.672   | 10.401  | 8.416   | 1.015 | 7.392   | 9.421   |
| 186 | ENSG00000106351 | AGFG2      | 1.3  | 0.0285341 | 0.083049  | 2.263   | 0.401 | 1.806   | 2.557   | 1.780   | 0.275 | 1.615   | 2.098   |
| 187 | ENSG00000006530 | AGK        | 1.2  | 0.0002023 | 0.0016106 | 22.141  | 0.728 | 21.537  | 22.950  | 19.225  | 0.151 | 19.119  | 19.398  |
| 188 | ENSG00000123908 | AGO2       | -1.1 | 0.0002162 | 0.0016963 | 37.214  | 0.866 | 36.648  | 38.211  | 42.432  | 1.918 | 40.254  | 43.868  |
| 189 | ENSG00000126070 | AGO3       | -1.1 | 0.0929079 | 0.2025169 | 3.771   | 0.137 | 3.687   | 3.929   | 4.156   | 0.278 | 3.854   | 4.402   |
| 190 | ENSG00000204310 | AGPAT1     | -1.1 | 0.0873438 | 0.1937267 | 52.200  | 4.209 | 47.819  | 56.213  | 57.002  | 3.333 | 53.775  | 60.432  |
| 191 | ENSG00000160216 | AGPAT3     | 1.6  | 2.732E-06 | 4.435E-05 | 3.030   | 0.493 | 2.496   | 3.469   | 1.965   | 0.286 | 1.729   | 2.282   |
| 192 | ENSG00000026652 | AGPAT4     | 1.1  | 0.100875  | 0.2144149 | 14.603  | 0.702 | 13.796  | 15.069  | 13.990  | 0.673 | 13.360  | 14.699  |
| 193 | ENSG00000279355 | AGPAT4-IT1 | -1.4 | 0.022671  | 0.0695511 | 3.708   | 0.458 | 3.302   | 4.205   | 5.203   | 1.225 | 3.887   | 6.309   |
| 194 | ENSG00000155189 | AGPAT5     | 1.1  | 0.0081647 | 0.0310942 | 64.339  | 4.221 | 60.116  | 68.558  | 59.903  | 1.430 | 58.884  | 61.538  |
| 195 | ENSG00000188157 | AGRN       | 1.1  | 0.0203699 | 0.0639652 | 59.018  | 0.980 | 57.943  | 59.862  | 55.660  | 5.126 | 51.478  | 61.379  |
| 196 | ENSG00000153207 | AHCTF1     | -1.1 | 0.057812  | 0.141727  | 25.613  | 1.221 | 24.265  | 26.643  | 27.907  | 1.472 | 26.802  | 29.577  |
| 197 | ENSG00000101444 | AHCY       | -1.1 | 0.0004756 | 0.0032123 | 259.452 | 4.957 | 253.923 | 263.498 | 292.262 | 7.503 | 286.974 | 300.849 |
| 198 | ENSG00000168710 | AHCYL1     | 1    | 0.1232838 | 0.2478425 | 114.021 | 2.963 | 111.867 | 117.400 | 111.864 | 2.380 | 109.278 | 113.961 |
| 199 | ENSG00000126705 | AHDC1      | -1.1 | 0.0262305 | 0.0777764 | 9.439   | 0.654 | 8.788   | 10.096  | 10.789  | 0.534 | 10.307  | 11.363  |
| 200 | ENSG00000124942 | AHNAK      | 1.6  | 2.806E-07 | 6.638E-06 | 18.932  | 2.481 | 16.316  | 21.252  | 12.128  | 0.846 | 11.163  | 12.743  |
| 201 | ENSG00000185567 | AHNAK2     | 1.2  | 0.0092055 | 0.0340333 | 1.720   | 0.167 | 1.564   | 1.896   | 1.464   | 0.070 | 1.387   | 1.522   |

|     | A               | B        | C    | D         | E         | F       | G      | H       | I       | J       | K      | L       | M       |
|-----|-----------------|----------|------|-----------|-----------|---------|--------|---------|---------|---------|--------|---------|---------|
| 202 | ENSG00000169877 | AHSP     | -2   | 0.0010628 | 0.0061858 | 3.515   | 1.002  | 2.366   | 4.203   | 7.398   | 2.120  | 4.974   | 8.905   |
| 203 | ENSG00000204472 | AIF1     | -1.3 | 0.0084844 | 0.0319521 | 6.577   | 0.425  | 6.252   | 7.058   | 8.977   | 1.133  | 7.967   | 10.202  |
| 204 | ENSG00000126878 | AIF1L    | 1.3  | 3.14E-11  | 2.322E-09 | 128.692 | 5.820  | 122.735 | 134.365 | 102.876 | 1.596  | 101.931 | 104.719 |
| 205 | ENSG00000156709 | AIFM1    | 1.1  | 0.0230138 | 0.0703983 | 58.054  | 1.739  | 56.048  | 59.125  | 55.047  | 0.799  | 54.316  | 55.900  |
| 206 | ENSG00000042286 | AIFM2    | 1.4  | 0.0016435 | 0.0087303 | 3.172   | 0.269  | 2.988   | 3.481   | 2.371   | 0.311  | 2.015   | 2.589   |
| 207 | ENSG00000146416 | AIG1     | 1.2  | 0.0004377 | 0.0029988 | 13.682  | 0.728  | 12.860  | 14.244  | 11.788  | 0.366  | 11.436  | 12.167  |
| 208 | ENSG00000106305 | AIMP2    | 1.1  | 0.1087489 | 0.2266074 | 46.426  | 2.665  | 43.647  | 48.959  | 43.928  | 2.711  | 41.132  | 46.545  |
| 209 | ENSG00000129474 | AJUBA    | 1.3  | 9.164E-07 | 1.779E-05 | 45.855  | 3.508  | 42.597  | 49.568  | 36.903  | 2.644  | 34.974  | 39.917  |
| 210 | ENSG00000106992 | AK1      | 1.3  | 0.0742401 | 0.1711591 | 2.627   | 0.546  | 2.067   | 3.158   | 2.072   | 0.446  | 1.630   | 2.522   |
| 211 | ENSG00000147853 | AK3      | 1.3  | 1.951E-09 | 8.942E-08 | 54.667  | 1.461  | 53.256  | 56.173  | 43.225  | 0.525  | 42.702  | 43.753  |
| 212 | ENSG00000162433 | AK4      | -1.2 | 0.0311728 | 0.0889081 | 34.185  | 5.798  | 30.365  | 40.857  | 40.768  | 1.417  | 39.803  | 42.395  |
| 213 | ENSG00000154027 | AK5      | -1.2 | 0.0262527 | 0.0778285 | 2.685   | 0.552  | 2.219   | 3.295   | 3.352   | 0.129  | 3.208   | 3.458   |
| 214 | ENSG00000140057 | AK7      | 1.6  | 3.373E-08 | 1.054E-06 | 5.875   | 0.435  | 5.373   | 6.145   | 3.641   | 0.108  | 3.537   | 3.753   |
| 215 | ENSG00000121057 | AKAP1    | -1.4 | 1.141E-09 | 5.451E-08 | 22.730  | 2.139  | 21.276  | 25.186  | 31.600  | 0.302  | 31.296  | 31.900  |
| 216 | ENSG00000108599 | AKAP10   | -1.1 | 0.0240772 | 0.0728084 | 19.828  | 1.348  | 18.730  | 21.332  | 22.496  | 1.347  | 21.002  | 23.615  |
| 217 | ENSG00000131016 | AKAP12   | 1.3  | 5.53E-11  | 3.848E-09 | 80.299  | 2.864  | 77.564  | 83.276  | 64.440  | 0.670  | 63.876  | 65.182  |
| 218 | ENSG00000170776 | AKAP13   | -1.2 | 3.71E-06  | 5.751E-05 | 9.273   | 0.389  | 8.948   | 9.704   | 11.330  | 0.193  | 11.111  | 11.480  |
| 219 | ENSG00000197976 | AKAP17A  | -1.3 | 5.679E-07 | 1.199E-05 | 31.507  | 2.075  | 29.139  | 33.007  | 42.359  | 3.896  | 38.263  | 46.018  |
| 220 | ENSG00000118507 | AKAP7    | 1.5  | 1.108E-08 | 4.084E-07 | 13.819  | 0.953  | 13.247  | 14.919  | 9.648   | 0.513  | 9.154   | 10.179  |
| 221 | ENSG00000011243 | AKAP8L   | -1.2 | 1.198E-05 | 0.0001556 | 53.363  | 2.581  | 50.419  | 55.243  | 63.640  | 1.962  | 62.413  | 65.902  |
| 222 | ENSG00000127914 | AKAP9    | -1.2 | 0.0328246 | 0.0925888 | 10.749  | 0.870  | 9.882   | 11.623  | 12.892  | 0.862  | 11.974  | 13.683  |
| 223 | ENSG00000174574 | AKIRIN1  | -1.2 | 2.646E-06 | 4.324E-05 | 308.320 | 10.721 | 300.090 | 320.445 | 362.875 | 11.343 | 355.982 | 375.967 |
| 224 | ENSG00000106948 | AKNA     | 1.2  | 0.0002407 | 0.001853  | 9.077   | 0.365  | 8.705   | 9.435   | 7.703   | 0.337  | 7.383   | 8.055   |
| 225 | ENSG00000117448 | AKR1A1   | -1.1 | 0.0006319 | 0.0040516 | 124.481 | 0.986  | 123.716 | 125.594 | 140.413 | 2.778  | 137.263 | 142.511 |
| 226 | ENSG00000227471 | AKR1B15  | 1.6  | 0.0655477 | 0.1557471 | 0.653   | 0.187  | 0.515   | 0.866   | 0.425   | 0.075  | 0.353   | 0.502   |
| 227 | ENSG00000196139 | AKR1C3   | 1.4  | 0.0040489 | 0.017936  | 2.986   | 0.464  | 2.591   | 3.497   | 2.257   | 0.289  | 2.073   | 2.590   |
| 228 | ENSG00000142208 | AKT1     | 1.2  | 0.0004643 | 0.0031474 | 17.339  | 0.576  | 16.968  | 18.003  | 15.344  | 0.692  | 14.581  | 15.931  |
| 229 | ENSG00000105221 | AKT2     | 1.1  | 0.0492955 | 0.125729  | 21.113  | 0.576  | 20.455  | 21.530  | 20.292  | 0.998  | 19.625  | 21.439  |
| 230 | ENSG00000117020 | AKT3     | -1.1 | 0.0031118 | 0.0145266 | 14.631  | 0.510  | 14.167  | 15.177  | 16.794  | 0.462  | 16.292  | 17.200  |
| 231 | ENSG00000023330 | ALAS1    | -1.1 | 0.0031286 | 0.014585  | 39.269  | 0.974  | 38.308  | 40.256  | 45.300  | 1.195  | 44.091  | 46.480  |
| 232 | ENSG00000059573 | ALDH18A1 | -1.1 | 0.0445512 | 0.1161725 | 111.087 | 2.166  | 108.636 | 112.747 | 119.861 | 1.303  | 118.363 | 120.725 |
| 233 | ENSG00000184254 | ALDH1A3  | 1.2  | 0.0063986 | 0.0256143 | 6.620   | 0.438  | 6.272   | 7.111   | 5.638   | 0.341  | 5.247   | 5.869   |
| 234 | ENSG00000144908 | ALDH1L1  | 1.5  | 0.0012115 | 0.0068551 | 0.760   | 0.099  | 0.689   | 0.873   | 0.504   | 0.012  | 0.490   | 0.511   |
| 235 | ENSG00000136010 | ALDH1L2  | 1.8  | 1.91E-11  | 1.51E-09  | 5.967   | 0.482  | 5.415   | 6.304   | 3.405   | 0.341  | 3.049   | 3.727   |
| 236 | ENSG00000111275 | ALDH2    | 1.3  | 2.62E-06  | 4.298E-05 | 12.851  | 0.455  | 12.425  | 13.330  | 10.400  | 0.339  | 10.130  | 10.781  |
| 237 | ENSG00000072210 | ALDH3A2  | 1.1  | 0.0001161 | 0.0010206 | 37.189  | 1.253  | 35.764  | 38.119  | 33.323  | 0.555  | 32.710  | 33.789  |
| 238 | ENSG00000159423 | ALDH4A1  | -1.2 | 0.0108614 | 0.03897   | 12.503  | 1.068  | 11.286  | 13.287  | 14.855  | 0.334  | 14.567  | 15.220  |
| 239 | ENSG00000112294 | ALDH5A1  | 1.3  | 8.438E-05 | 0.0007855 | 7.285   | 0.624  | 6.654   | 7.901   | 5.657   | 0.145  | 5.509   | 5.800   |
| 240 | ENSG00000119711 | ALDH6A1  | -1.1 | 0.0169231 | 0.0554368 | 20.676  | 2.366  | 18.036  | 22.603  | 23.518  | 0.289  | 23.249  | 23.823  |
| 241 | ENSG00000164904 | ALDH7A1  | -1   | 0.0798176 | 0.1809592 | 26.221  | 0.273  | 26.017  | 26.530  | 28.128  | 1.069  | 27.262  | 29.323  |
| 242 | ENSG00000143149 | ALDH9A1  | 1.1  | 0.0251952 | 0.0753824 | 76.141  | 2.323  | 73.555  | 78.051  | 72.441  | 3.163  | 69.973  | 76.007  |
| 243 | ENSG00000149925 | ALDOA    | -1.2 | 2.671E-06 | 4.352E-05 | 165.474 | 2.673  | 163.818 | 168.557 | 204.326 | 16.062 | 185.873 | 215.168 |

|     | A               | B          | C    | D         | E         | F      | G     | H      | I       | J      | K     | L      | M      |
|-----|-----------------|------------|------|-----------|-----------|--------|-------|--------|---------|--------|-------|--------|--------|
| 244 | ENSG00000033011 | ALG1       | 1.3  | 0.0001207 | 0.0010537 | 11.754 | 0.221 | 11.500 | 11.899  | 9.598  | 0.067 | 9.549  | 9.674  |
| 245 | ENSG00000139133 | ALG10      | -1.2 | 0.0288205 | 0.0836952 | 6.665  | 0.316 | 6.375  | 7.002   | 7.924  | 0.810 | 7.162  | 8.775  |
| 246 | ENSG00000175548 | ALG10B     | -1.1 | 0.0547555 | 0.1362484 | 4.899  | 0.110 | 4.776  | 4.987   | 5.540  | 0.055 | 5.478  | 5.582  |
| 247 | ENSG00000172339 | ALG14      | 1.3  | 0.1100243 | 0.2284923 | 0.610  | 0.152 | 0.495  | 0.782   | 0.490  | 0.097 | 0.406  | 0.596  |
| 248 | ENSG00000189366 | ALG1L      | 1.9  | 0.0050132 | 0.0211867 | 3.514  | 0.135 | 3.358  | 3.593   | 1.896  | 0.586 | 1.474  | 2.566  |
| 249 | ENSG00000119523 | ALG2       | 1.1  | 0.009732  | 0.0356504 | 27.527 | 1.629 | 25.738 | 28.924  | 24.873 | 0.427 | 24.537 | 25.354 |
| 250 | ENSG00000214160 | ALG3       | -1.1 | 0.0184509 | 0.0591962 | 25.870 | 0.650 | 25.190 | 26.486  | 29.446 | 2.407 | 27.527 | 32.147 |
| 251 | ENSG00000189292 | ALKAL2     | 1.9  | 0.000164  | 0.00136   | 3.468  | 0.731 | 2.720  | 4.181   | 1.855  | 0.545 | 1.356  | 2.437  |
| 252 | ENSG00000100601 | ALKBH1     | -1.1 | 0.0740237 | 0.1708232 | 11.787 | 0.357 | 11.577 | 12.200  | 13.435 | 0.947 | 12.669 | 14.494 |
| 253 | ENSG00000166199 | ALKBH3     | 1.3  | 0.0013245 | 0.0073325 | 11.782 | 0.085 | 11.702 | 11.871  | 9.446  | 0.385 | 9.217  | 9.890  |
| 254 | ENSG00000091542 | ALKBH5     | -1.1 | 0.0021358 | 0.0106683 | 42.970 | 1.679 | 41.054 | 44.182  | 49.655 | 3.958 | 46.444 | 54.078 |
| 255 | ENSG00000239382 | ALKBH6     | 1.2  | 0.0442518 | 0.1156771 | 2.978  | 0.182 | 2.776  | 3.130   | 2.455  | 0.306 | 2.138  | 2.749  |
| 256 | ENSG00000137760 | ALKBH8     | 1.1  | 0.1041272 | 0.2195617 | 9.191  | 0.631 | 8.464  | 9.601   | 8.547  | 0.442 | 8.037  | 8.816  |
| 257 | ENSG00000215067 | ALOX12-AS1 | 1.4  | 0.0604351 | 0.1465221 | 1.749  | 0.116 | 1.667  | 1.882   | 1.318  | 0.388 | 0.972  | 1.738  |
| 258 | ENSG00000262943 | ALOX12P2   | 1.2  | 0.0554867 | 0.1375214 | 3.502  | 0.274 | 3.185  | 3.662   | 3.043  | 0.251 | 2.793  | 3.295  |
| 259 | ENSG00000161905 | ALOX15     | -1.6 | 0.0987513 | 0.2114422 | 0.304  | 0.173 | 0.131  | 0.477   | 0.501  | 0.079 | 0.433  | 0.588  |
| 260 | ENSG00000198796 | ALPK2      | 3.2  | 0.0013405 | 0.007406  | 0.178  | 0.080 | 0.111  | 0.266   | 0.057  | 0.028 | 0.033  | 0.088  |
| 261 | ENSG00000136383 | ALPK3      | 1.3  | 1.288E-07 | 3.403E-06 | 13.426 | 0.766 | 12.681 | 14.211  | 10.658 | 0.392 | 10.205 | 10.894 |
| 262 | ENSG00000163286 | ALPPL2     | -2.3 | 0.0002015 | 0.0016057 | 0.801  | 0.357 | 0.593  | 1.214   | 1.855  | 0.442 | 1.406  | 2.290  |
| 263 | ENSG00000178038 | ALS2CL     | -1.9 | 1.928E-07 | 4.823E-06 | 2.160  | 0.329 | 1.794  | 2.435   | 4.141  | 0.648 | 3.721  | 4.887  |
| 264 | ENSG00000183684 | ALYREF     | 1.1  | 0.0367544 | 0.1004405 | 98.679 | 7.885 | 92.395 | 107.527 | 92.841 | 3.502 | 90.082 | 96.781 |
| 265 | ENSG00000242110 | AMACR      | -1.3 | 0.0182945 | 0.05888   | 1.979  | 0.197 | 1.817  | 2.199   | 2.598  | 0.286 | 2.328  | 2.898  |
| 266 | ENSG00000110497 | AMBRA1     | -1.2 | 3.236E-05 | 0.0003556 | 9.710  | 0.117 | 9.611  | 9.839   | 12.159 | 0.673 | 11.476 | 12.821 |
| 267 | ENSG00000162066 | AMDHD2     | 1.1  | 0.0618731 | 0.1490047 | 12.089 | 0.698 | 11.336 | 12.715  | 11.081 | 1.343 | 9.785  | 12.466 |
| 268 | ENSG00000184675 | AMER1      | -1.3 | 6.492E-07 | 1.337E-05 | 5.667  | 0.529 | 5.057  | 5.998   | 7.818  | 0.256 | 7.523  | 7.984  |
| 269 | ENSG00000181754 | AMIGO1     | -1.1 | 0.1018259 | 0.21594   | 3.859  | 0.373 | 3.446  | 4.171   | 4.499  | 0.264 | 4.317  | 4.802  |
| 270 | ENSG00000139211 | AMIGO2     | 1.6  | 0.0002661 | 0.0020127 | 2.833  | 0.134 | 2.749  | 2.988   | 1.846  | 0.349 | 1.519  | 2.214  |
| 271 | ENSG00000101935 | AMMECR1    | -1.2 | 0.0004172 | 0.0028862 | 26.920 | 0.983 | 26.271 | 28.052  | 31.717 | 1.128 | 30.963 | 33.014 |
| 272 | ENSG00000126016 | AMOT       | -1.1 | 0.064143  | 0.1532916 | 13.694 | 0.540 | 13.077 | 14.075  | 15.077 | 0.735 | 14.485 | 15.900 |
| 273 | ENSG00000166025 | AMOTL1     | 1.2  | 1.407E-05 | 0.0001777 | 19.173 | 0.407 | 18.891 | 19.640  | 16.678 | 0.552 | 16.203 | 17.284 |
| 274 | ENSG00000114019 | AMOTL2     | 1.3  | 3.233E-08 | 1.022E-06 | 34.786 | 0.832 | 33.901 | 35.552  | 27.751 | 2.176 | 25.252 | 29.220 |
| 275 | ENSG00000116337 | AMPD2      | -1.3 | 9.548E-06 | 0.0001285 | 9.138  | 0.708 | 8.683  | 9.954   | 11.902 | 0.434 | 11.403 | 12.195 |
| 277 | ENSG00000078053 | AMPH       | -1.3 | 0.000815  | 0.0049439 | 4.723  | 0.336 | 4.378  | 5.049   | 6.164  | 0.259 | 5.924  | 6.438  |
| 278 | ENSG00000214174 | AMZ2P1     | 1.3  | 0.0002499 | 0.0019087 | 15.522 | 1.258 | 14.590 | 16.954  | 12.487 | 0.567 | 11.855 | 12.952 |
| 279 | ENSG00000153107 | ANAPC1     | 1.1  | 0.0009251 | 0.0054801 | 35.086 | 0.237 | 34.837 | 35.309  | 32.738 | 0.239 | 32.556 | 33.008 |
| 280 | ENSG00000141552 | ANAPC11    | -1.1 | 0.0047839 | 0.0204526 | 33.755 | 1.373 | 32.175 | 34.647  | 38.664 | 2.292 | 36.868 | 41.246 |
| 281 | ENSG00000129055 | ANAPC13    | 1.1  | 0.0206395 | 0.0646556 | 42.136 | 1.249 | 41.397 | 43.578  | 38.827 | 2.506 | 35.934 | 40.325 |
| 282 | ENSG00000176248 | ANAPC2     | -1.2 | 0.000566  | 0.0037017 | 11.556 | 0.633 | 11.168 | 12.287  | 14.190 | 0.709 | 13.372 | 14.615 |
| 283 | ENSG00000053900 | ANAPC4     | 1.1  | 0.0045328 | 0.019607  | 17.398 | 0.679 | 16.819 | 18.145  | 15.761 | 0.377 | 15.465 | 16.185 |
| 284 | ENSG00000089053 | ANAPC5     | -1.1 | 0.0005119 | 0.0034235 | 23.476 | 0.724 | 22.643 | 23.951  | 26.801 | 0.600 | 26.127 | 27.276 |
| 285 | ENSG00000196510 | ANAPC7     | 1.1  | 0.0073445 | 0.0285552 | 27.362 | 0.296 | 27.020 | 27.546  | 25.494 | 0.107 | 25.403 | 25.612 |

|     | A                | B                   | C    | D         | E         | F      | G     | H      | I      | J      | K     | L      | M      |
|-----|------------------|---------------------|------|-----------|-----------|--------|-------|--------|--------|--------|-------|--------|--------|
| 286 | ENSG00000013523  | ANGEL1              | -1.1 | 0.0386878 | 0.1041921 | 20.023 | 1.172 | 18.761 | 21.076 | 22.167 | 0.556 | 21.543 | 22.611 |
| 287 | ENSG000000174606 | ANGEL2              | 1.2  | 0.0004343 | 0.0029832 | 14.412 | 0.236 | 14.170 | 14.640 | 12.579 | 0.738 | 11.758 | 13.189 |
| 288 | ENSG000000101280 | ANGPT4              | -1.5 | 0.0875609 | 0.1940406 | 0.423  | 0.151 | 0.253  | 0.542  | 0.634  | 0.205 | 0.468  | 0.864  |
| 289 | ENSG000000136859 | ANGPTL2             | 1.1  | 0.0521    | 0.1310952 | 8.226  | 0.220 | 8.045  | 8.472  | 7.298  | 1.133 | 6.179  | 8.445  |
| 290 | ENSG000000167772 | ANGPTL4             | -1.5 | 0.0161977 | 0.0536629 | 1.173  | 0.340 | 0.780  | 1.369  | 1.860  | 0.104 | 1.748  | 1.953  |
| 291 | ENSG00000029534  | ANK1                | -1.1 | 0.0958503 | 0.2070919 | 9.921  | 0.963 | 9.043  | 10.951 | 11.016 | 1.189 | 9.765  | 12.131 |
| 292 | ENSG000000145362 | ANK2                | 1.4  | 2.024E-09 | 9.226E-08 | 8.173  | 0.133 | 8.028  | 8.288  | 6.126  | 0.153 | 5.962  | 6.263  |
| 293 | ENSG000000132623 | ANKEF1              | -1.1 | 0.0811083 | 0.1832711 | 8.073  | 0.535 | 7.609  | 8.658  | 9.086  | 0.147 | 8.926  | 9.214  |
| 294 | ENSG000000185722 | ANKFY1              | -1.1 | 0.0117273 | 0.0414601 | 16.179 | 0.114 | 16.049 | 16.260 | 17.997 | 0.582 | 17.334 | 18.420 |
| 295 | ENSG000000254996 | ANKHD1-<br>EIF4EBP3 | 1.8  | 0.0133463 | 0.0460007 | 0.273  | 0.065 | 0.207  | 0.337  | 0.153  | 0.046 | 0.103  | 0.192  |
| 296 | ENSG000000164331 | ANKRA2              | -1.2 | 0.0018607 | 0.0095983 | 31.005 | 1.568 | 29.304 | 32.393 | 36.761 | 2.411 | 35.232 | 39.541 |
| 297 | ENSG000000148677 | ANKRD1              | 10.7 | 0.0005209 | 0.0034647 | 1.494  | 1.051 | 0.527  | 2.613  | 0.137  | 0.128 | 0.000  | 0.253  |
| 298 | ENSG000000229152 | ANKRD10-<br>IT1     | 1.2  | 0.0001343 | 0.0011503 | 88.216 | 2.793 | 85.294 | 90.860 | 73.879 | 2.461 | 71.050 | 75.516 |
| 299 | ENSG000000167522 | ANKRD11             | 1.2  | 3.149E-06 | 4.985E-05 | 29.808 | 0.795 | 29.005 | 30.594 | 25.585 | 0.886 | 25.063 | 26.608 |
| 300 | ENSG000000101745 | ANKRD12             | -1.2 | 0.0087776 | 0.0328079 | 11.827 | 0.487 | 11.516 | 12.388 | 14.025 | 1.145 | 12.790 | 15.051 |
| 301 | ENSG000000076513 | ANKRD13A            | 1.3  | 3.599E-05 | 0.0003885 | 9.302  | 0.503 | 8.757  | 9.749  | 7.472  | 0.089 | 7.416  | 7.575  |
| 302 | ENSG000000198720 | ANKRD13B            | -1.2 | 0.0011262 | 0.0064679 | 11.841 | 1.374 | 10.782 | 13.394 | 14.756 | 1.137 | 14.079 | 16.069 |
| 303 | ENSG000000172932 | ANKRD13D            | -1.3 | 0.000182  | 0.0014803 | 5.054  | 0.418 | 4.693  | 5.512  | 6.629  | 0.439 | 6.125  | 6.934  |
| 304 | ENSG000000230453 | ANKRD18B            | 1.1  | 0.0674937 | 0.1593891 | 6.062  | 0.966 | 4.966  | 6.792  | 5.422  | 0.387 | 4.980  | 5.701  |
| 306 | ENSG000000159712 | ANKRD18C<br>P       | 1.1  | 0.0184744 | 0.0592279 | 32.769 | 0.917 | 31.795 | 33.616 | 29.962 | 2.506 | 27.737 | 32.677 |
| 307 | ENSG000000187984 | ANKRD19P            | -1.7 | 0.007314  | 0.0284645 | 0.954  | 0.348 | 0.556  | 1.202  | 1.647  | 0.356 | 1.274  | 1.982  |
| 308 | ENSG000000089847 | ANKRD24             | -1.5 | 1.205E-05 | 0.0001562 | 5.318  | 0.714 | 4.895  | 6.142  | 8.061  | 1.053 | 6.873  | 8.879  |
| 309 | ENSG000000154065 | ANKRD29             | -1.4 | 0.0040503 | 0.0179372 | 1.491  | 0.324 | 1.156  | 1.802  | 2.123  | 0.161 | 1.982  | 2.298  |
| 310 | ENSG000000164236 | ANKRD33B            | 1.8  | 1.69E-16  | 4.75E-14  | 12.218 | 0.298 | 11.924 | 12.519 | 6.862  | 0.415 | 6.516  | 7.322  |
| 311 | ENSG000000189127 | ANKRD34B            | 1.2  | 0.0095346 | 0.0350485 | 7.240  | 0.457 | 6.755  | 7.664  | 5.970  | 1.151 | 5.286  | 7.299  |
| 312 | ENSG000000186352 | ANKRD37             | -1.7 | 0.0170938 | 0.0558015 | 0.593  | 0.199 | 0.404  | 0.801  | 1.047  | 0.127 | 0.906  | 1.152  |

|     | A               | B       | C    | D         | E         | F       | G      | H       | I       | J       | K     | L       | M       |
|-----|-----------------|---------|------|-----------|-----------|---------|--------|---------|---------|---------|-------|---------|---------|
| 313 | ENSG00000154945 | ANKRD40 | -1.1 | 0.0506658 | 0.1283062 | 39.762  | 2.419  | 37.330  | 42.168  | 43.549  | 1.821 | 41.679  | 45.317  |
| 314 | ENSG00000151458 | ANKRD50 | -1.1 | 0.0238584 | 0.072353  | 22.160  | 0.222  | 21.958  | 22.397  | 24.454  | 0.339 | 24.088  | 24.756  |
| 315 | ENSG00000139645 | ANKRD52 | -1.1 | 0.0735849 | 0.1701589 | 23.729  | 0.719  | 23.168  | 24.540  | 25.769  | 1.299 | 24.314  | 26.811  |
| 316 | ENSG00000100124 | ANKRD54 | 1.1  | 0.0394928 | 0.105888  | 6.866   | 0.015  | 6.849   | 6.877   | 6.103   | 0.228 | 5.839   | 6.239   |
| 317 | ENSG00000135299 | ANKRD6  | -1.2 | 0.0089704 | 0.0333444 | 4.718   | 0.296  | 4.488   | 5.052   | 5.625   | 0.361 | 5.295   | 6.011   |
| 318 | ENSG00000106013 | ANKRD7  | 1.4  | 0.0307295 | 0.0878809 | 1.753   | 0.300  | 1.407   | 1.942   | 1.257   | 0.030 | 1.225   | 1.285   |
| 319 | ENSG00000156381 | ANKRD9  | -1.1 | 0.0992929 | 0.2123061 | 12.462  | 0.131  | 12.319  | 12.575  | 14.481  | 2.604 | 12.247  | 17.342  |
| 320 | ENSG00000064999 | ANKS1A  | -1.1 | 0.0526128 | 0.1321415 | 25.167  | 1.091  | 23.965  | 26.095  | 27.551  | 1.563 | 25.918  | 29.032  |
| 321 | ENSG00000163516 | ANKZF1  | -1.1 | 0.0615959 | 0.1485063 | 21.424  | 0.395  | 21.006  | 21.791  | 23.351  | 0.398 | 22.937  | 23.730  |
| 322 | ENSG00000131620 | ANO1    | -1.5 | 0.000235  | 0.0018179 | 1.755   | 0.319  | 1.423   | 2.060   | 2.665   | 0.077 | 2.579   | 2.727   |
| 323 | ENSG00000171714 | ANO5    | -1.1 | 0.0950688 | 0.2059927 | 7.171   | 0.447  | 6.895   | 7.687   | 8.029   | 0.426 | 7.540   | 8.320   |
| 324 | ENSG00000146205 | ANO7    | -1.2 | 0.0737448 | 0.170412  | 1.197   | 0.093  | 1.090   | 1.256   | 1.511   | 0.049 | 1.473   | 1.565   |
| 325 | ENSG00000074855 | ANO8    | -1.3 | 0.0001118 | 0.0009877 | 8.509   | 0.385  | 8.219   | 8.947   | 11.028  | 1.123 | 9.854   | 12.094  |
| 326 | ENSG00000185101 | ANO9    | -1.2 | 0.010183  | 0.0369979 | 4.262   | 0.810  | 3.672   | 5.186   | 5.418   | 0.668 | 4.705   | 6.030   |
| 327 | ENSG00000011201 | ANOS1   | 1.2  | 1.696E-05 | 0.0002064 | 63.349  | 5.318  | 58.353  | 68.940  | 53.750  | 1.626 | 51.875  | 54.775  |
| 328 | ENSG00000140350 | ANP32A  | -1.1 | 0.0071914 | 0.0281157 | 95.690  | 6.066  | 89.166  | 101.160 | 105.756 | 1.817 | 104.194 | 107.750 |
| 329 | ENSG00000136938 | ANP32B  | 1.1  | 0.1053714 | 0.2212473 | 168.113 | 10.902 | 157.527 | 179.306 | 163.384 | 2.262 | 162.016 | 165.994 |
| 330 | ENSG00000248546 | ANP32C  | 1.5  | 0.0496819 | 0.126402  | 5.909   | 1.596  | 4.084   | 7.044   | 4.165   | 1.356 | 3.068   | 5.681   |
| 331 | ENSG00000163297 | ANTXR2  | 1.2  | 0.0351623 | 0.0972843 | 3.013   | 0.154  | 2.844   | 3.145   | 2.669   | 0.121 | 2.598   | 2.809   |
| 332 | ENSG00000135046 | ANXA1   | 1.9  | 0.000589  | 0.003824  | 4.141   | 1.462  | 2.483   | 5.244   | 2.205   | 0.174 | 2.009   | 2.342   |
| 333 | ENSG00000138772 | ANXA3   | 1.8  | 1.08E-12  | 1.183E-10 | 41.385  | 4.514  | 36.992  | 46.011  | 23.536  | 2.423 | 20.856  | 25.572  |
| 334 | ENSG00000196975 | ANXA4   | 1.5  | 2.385E-08 | 7.939E-07 | 5.326   | 0.406  | 4.936   | 5.746   | 3.647   | 0.268 | 3.440   | 3.950   |
| 335 | ENSG00000164111 | ANXA5   | 1.4  | 5.05E-13  | 5.73E-11  | 336.984 | 25.638 | 313.831 | 364.537 | 253.597 | 3.378 | 249.702 | 255.721 |
| 336 | ENSG00000197043 | ANXA6   | 1.1  | 0.0544608 | 0.1356148 | 59.981  | 1.344  | 58.710  | 61.388  | 57.725  | 1.804 | 56.517  | 59.799  |
| 337 | ENSG00000138279 | ANXA7   | 1.2  | 8.65E-06  | 0.0001177 | 94.717  | 2.926  | 91.414  | 96.981  | 82.785  | 1.668 | 80.877  | 83.968  |
| 338 | ENSG00000131480 | AOC2    | -1.2 | 0.0718363 | 0.1670747 | 7.360   | 0.431  | 6.890   | 7.738   | 8.658   | 0.471 | 8.183   | 9.124   |
| 339 | ENSG00000213983 | AP1G2   | -1.2 | 7.792E-05 | 0.0007379 | 13.672  | 0.315  | 13.371  | 14.000  | 16.630  | 0.287 | 16.325  | 16.894  |
| 340 | ENSG00000129354 | AP1M2   | -1.1 | 0.0614882 | 0.1482889 | 120.897 | 2.301  | 118.445 | 123.010 | 130.804 | 1.352 | 129.697 | 132.310 |
| 341 | ENSG00000106367 | AP1S1   | 1.1  | 0.0024526 | 0.0119715 | 105.534 | 5.291  | 100.872 | 111.285 | 95.377  | 6.051 | 88.497  | 99.872  |
| 342 | ENSG00000182287 | AP1S2   | 1.1  | 0.0004587 | 0.0031223 | 237.787 | 6.458  | 231.367 | 244.283 | 216.467 | 6.740 | 209.868 | 223.339 |
| 343 | ENSG00000152056 | AP1S3   | 1.2  | 0.0122072 | 0.0428608 | 6.052   | 0.355  | 5.652   | 6.329   | 5.154   | 0.249 | 4.985   | 5.440   |
| 344 | ENSG00000183020 | AP2A2   | -1.1 | 0.0044222 | 0.0192206 | 11.863  | 0.335  | 11.563  | 12.225  | 13.563  | 0.261 | 13.264  | 13.745  |
| 345 | ENSG00000006125 | AP2B1   | 1.1  | 0.040311  | 0.1076068 | 118.762 | 2.511  | 115.866 | 120.322 | 115.305 | 2.984 | 112.754 | 118.586 |
| 346 | ENSG00000042753 | AP2S1   | 1.1  | 0.0646959 | 0.1542488 | 103.467 | 1.113  | 102.471 | 104.668 | 99.083  | 3.267 | 95.392  | 101.604 |
| 347 | ENSG00000132842 | AP3B1   | -1.1 | 0.0106718 | 0.0384027 | 33.910  | 1.862  | 32.681  | 36.053  | 37.757  | 1.336 | 36.732  | 39.268  |
| 348 | ENSG00000103723 | AP3B2   | 1.3  | 1.142E-05 | 0.000149  | 6.336   | 0.574  | 5.781   | 6.928   | 4.881   | 0.406 | 4.480   | 5.292   |
| 349 | ENSG00000065000 | AP3D1   | -1.1 | 0.0003011 | 0.0022173 | 58.939  | 1.711  | 57.526  | 60.841  | 67.691  | 3.458 | 64.406  | 71.299  |
| 350 | ENSG00000070718 | AP3M2   | 1.1  | 0.0280921 | 0.0821017 | 14.138  | 0.265  | 13.880  | 14.409  | 13.141  | 0.360 | 12.923  | 13.557  |
| 351 | ENSG00000221838 | AP4M1   | -1.1 | 0.1196279 | 0.2422729 | 4.308   | 0.099  | 4.224   | 4.417   | 5.003   | 0.368 | 4.637   | 5.372   |
| 352 | ENSG00000100478 | AP4S1   | 1.3  | 0.0002327 | 0.0018039 | 3.469   | 0.138  | 3.334   | 3.610   | 2.652   | 0.237 | 2.403   | 2.877   |
| 353 | ENSG00000254470 | AP5B1   | -1.1 | 0.088776  | 0.196095  | 11.790  | 0.489  | 11.272  | 12.245  | 13.271  | 1.493 | 11.653  | 14.596  |
| 354 | ENSG00000053770 | AP5M1   | 1.1  | 0.0336323 | 0.0941292 | 13.585  | 1.333  | 12.745  | 15.122  | 12.743  | 0.469 | 12.344  | 13.259  |
| 355 | ENSG00000242802 | AP5Z1   | 1.2  | 0.0116766 | 0.0413238 | 4.741   | 0.410  | 4.407   | 5.199   | 4.072   | 0.264 | 3.864   | 4.369   |



|     | A               | B            | C    | D         | E         | F       | G      | H       | I       | J       | K      | L       | M       |
|-----|-----------------|--------------|------|-----------|-----------|---------|--------|---------|---------|---------|--------|---------|---------|
| 356 | ENSG00000120868 | APAF1        | -1.1 | 0.0664159 | 0.1575003 | 17.422  | 1.202  | 16.127  | 18.502  | 19.292  | 1.096  | 18.393  | 20.513  |
| 357 | ENSG00000107282 | APBA1        | 1.8  | 0.0011629 | 0.0066404 | 0.577   | 0.039  | 0.532   | 0.602   | 0.332   | 0.047  | 0.289   | 0.381   |
| 358 | ENSG00000034053 | APBA2        | 1.2  | 0.000996  | 0.005853  | 10.329  | 0.248  | 10.044  | 10.498  | 8.927   | 0.278  | 8.607   | 9.089   |
| 359 | ENSG00000011132 | APBA3        | -1.2 | 0.0397292 | 0.1063532 | 7.624   | 0.799  | 7.020   | 8.530   | 9.129   | 1.698  | 7.212   | 10.443  |
| 360 | ENSG00000134982 | APC          | 1.1  | 0.0719059 | 0.1672137 | 7.826   | 0.307  | 7.545   | 8.154   | 7.393   | 0.250  | 7.241   | 7.682   |
| 361 | ENSG00000154856 | APCDD1       | 1.3  | 0.1006151 | 0.2140218 | 1.497   | 0.448  | 0.994   | 1.855   | 1.215   | 0.310  | 1.026   | 1.573   |
| 362 | ENSG00000198768 | APCDD1L      | -1.7 | 0.0025095 | 0.0122209 | 0.739   | 0.140  | 0.643   | 0.899   | 1.313   | 0.301  | 0.974   | 1.547   |
| 363 | ENSG00000248329 | APELA        | 2    | 5.377E-05 | 0.0005429 | 195.335 | 27.954 | 166.047 | 221.729 | 101.724 | 15.158 | 90.224  | 118.900 |
| 364 | ENSG00000138613 | APH1B        | 1.2  | 0.0001953 | 0.0015633 | 24.741  | 0.056  | 24.704  | 24.805  | 21.410  | 1.035  | 20.411  | 22.478  |
| 365 | ENSG00000134817 | APLNR        | 2    | 0.0019744 | 0.0100701 | 1.004   | 0.138  | 0.870   | 1.145   | 0.511   | 0.145  | 0.377   | 0.665   |
| 366 | ENSG00000105290 | APLP1        | -1.1 | 0.1151496 | 0.2357493 | 9.642   | 0.438  | 9.329   | 10.143  | 10.857  | 0.830  | 10.271  | 11.807  |
| 367 | ENSG00000084234 | APLP2        | 1.1  | 0.0028957 | 0.0136647 | 201.254 | 0.757  | 200.681 | 202.113 | 190.887 | 4.843  | 185.410 | 194.601 |
| 368 | ENSG00000128383 | APOBEC3A     | 1.5  | 0.0371312 | 0.1010643 | 1.626   | 0.535  | 1.289   | 2.243   | 1.106   | 0.122  | 0.983   | 1.227   |
| 369 | ENSG00000179750 | APOBEC3B     | 1.4  | 2.155E-07 | 5.268E-06 | 67.486  | 8.458  | 59.332  | 76.219  | 50.966  | 0.870  | 50.352  | 51.961  |
| 370 | ENSG00000249310 | APOBEC3B-AS1 | 1.5  | 0.0013282 | 0.0073485 | 16.408  | 1.946  | 15.260  | 18.655  | 11.226  | 1.147  | 9.902   | 11.894  |
| 371 | ENSG00000244509 | APOBEC3C     | -1.1 | 0.109157  | 0.2271933 | 51.094  | 2.923  | 49.019  | 54.438  | 55.462  | 2.030  | 53.446  | 57.507  |
| 372 | ENSG00000130208 | APOC1        | 1.3  | 0.0001399 | 0.0011862 | 50.921  | 1.062  | 50.047  | 52.102  | 41.419  | 3.718  | 38.502  | 45.606  |
| 373 | ENSG00000130203 | APOE         | 1.4  | 1.33E-13  | 1.78E-11  | 824.314 | 29.664 | 799.318 | 857.094 | 612.206 | 40.077 | 571.085 | 651.151 |
| 374 | ENSG00000128335 | APOL2        | 1.2  | 0.0067922 | 0.0268091 | 13.975  | 0.617  | 13.349  | 14.582  | 12.256  | 0.233  | 12.119  | 12.524  |
| 375 | ENSG00000142192 | APP          | 1    | 0.0985814 | 0.2111316 | 355.654 | 15.451 | 344.414 | 373.273 | 349.665 | 5.480  | 343.339 | 352.938 |
| 376 | ENSG00000136044 | APPL2        | 1.1  | 0.0545703 | 0.1358273 | 19.600  | 0.372  | 19.232  | 19.975  | 18.494  | 0.382  | 18.192  | 18.923  |
| 377 | ENSG00000198931 | APRT         | -1.1 | 0.0166551 | 0.0547603 | 154.969 | 1.388  | 153.394 | 156.009 | 170.726 | 6.065  | 165.205 | 177.217 |
| 378 | ENSG00000137074 | APTX         | 1.3  | 1.838E-06 | 3.158E-05 | 32.994  | 0.346  | 32.597  | 33.226  | 26.875  | 0.833  | 26.295  | 27.830  |
| 379 | ENSG00000171885 | AQP4         | -1.3 | 0.0209229 | 0.0653982 | 2.058   | 0.339  | 1.740   | 2.414   | 2.716   | 0.357  | 2.306   | 2.948   |
| 380 | ENSG00000021776 | AQR          | -1.1 | 0.0048197 | 0.0205797 | 31.941  | 0.846  | 31.322  | 32.906  | 35.487  | 0.809  | 34.739  | 36.345  |
| 381 | ENSG00000078061 | ARAF         | -1.1 | 0.0349817 | 0.0969435 | 22.756  | 3.031  | 19.338  | 25.118  | 26.132  | 1.208  | 24.785  | 27.121  |
| 382 | ENSG00000186635 | ARAP1        | -1.1 | 0.0351763 | 0.0972914 | 22.075  | 0.245  | 21.881  | 22.350  | 24.251  | 1.241  | 23.220  | 25.629  |
| 383 | ENSG00000047365 | ARAP2        | 2.4  | 6.835E-09 | 2.664E-07 | 2.190   | 0.559  | 1.556   | 2.615   | 0.930   | 0.094  | 0.850   | 1.034   |
| 384 | ENSG00000120318 | ARAP3        | -1.1 | 0.0026424 | 0.0127395 | 23.599  | 1.040  | 22.952  | 24.798  | 27.304  | 1.997  | 25.507  | 29.454  |
| 385 | ENSG00000198576 | ARC          | 1.1  | 0.1008537 | 0.2144149 | 10.728  | 0.660  | 10.161  | 11.452  | 9.693   | 1.752  | 7.857   | 11.347  |
| 386 | ENSG00000095139 | ARCN1        | -1.2 | 9.01E-10  | 4.469E-08 | 133.584 | 1.548  | 131.809 | 134.653 | 169.392 | 8.272  | 163.962 | 178.913 |
| 387 | ENSG00000143761 | ARF1         | -1.1 | 0.0001816 | 0.001478  | 169.879 | 4.904  | 165.555 | 175.207 | 194.453 | 8.039  | 185.214 | 199.847 |
| 388 | ENSG00000134287 | ARF3         | 1.2  | 7.465E-06 | 0.0001038 | 105.449 | 4.468  | 100.299 | 108.299 | 93.391  | 4.066  | 89.015  | 97.054  |
| 389 | ENSG00000168374 | ARF4         | -1.1 | 0.0537559 | 0.1342605 | 178.100 | 1.747  | 176.093 | 179.280 | 192.083 | 2.449  | 190.240 | 194.862 |
| 390 | ENSG00000101199 | ARFGAP1      | -1.3 | 3.148E-07 | 7.278E-06 | 31.923  | 2.089  | 30.205  | 34.249  | 41.049  | 2.932  | 38.232  | 44.084  |
| 391 | ENSG00000132254 | ARFIP2       | -1.2 | 0.0001732 | 0.0014209 | 15.682  | 0.724  | 14.991  | 16.435  | 19.170  | 0.841  | 18.301  | 19.981  |
| 392 | ENSG00000134884 | ARGLU1       | -1.1 | 0.0005509 | 0.0036183 | 176.122 | 5.731  | 171.456 | 182.520 | 201.542 | 9.049  | 191.218 | 208.097 |

|     | A               | B             | C    | D         | E         | F      | G     | H      | I      | J      | K     | L      | M      |
|-----|-----------------|---------------|------|-----------|-----------|--------|-------|--------|--------|--------|-------|--------|--------|
| 393 | ENSG00000071205 | ARHGAP10      | 1.3  | 0.0050444 | 0.021289  | 2.124  | 0.304 | 1.772  | 2.307  | 1.674  | 0.224 | 1.458  | 1.904  |
| 394 | ENSG00000198826 | ARHGAP11<br>A | -1.1 | 0.0100364 | 0.0365515 | 61.777 | 1.955 | 60.246 | 63.980 | 68.648 | 4.041 | 65.320 | 73.145 |
| 395 | ENSG00000187951 | ARHGAP11<br>B | -1.2 | 0.0014984 | 0.0080862 | 6.392  | 0.399 | 5.932  | 6.637  | 7.711  | 0.063 | 7.639  | 7.759  |
| 396 | ENSG00000165322 | ARHGAP12      | 1.2  | 5.246E-07 | 1.125E-05 | 38.868 | 1.406 | 37.384 | 40.182 | 32.209 | 1.870 | 30.079 | 33.581 |
| 397 | ENSG00000140750 | ARHGAP17      | -1.1 | 0.0230799 | 0.0705112 | 11.366 | 0.631 | 10.686 | 11.934 | 12.716 | 0.453 | 12.309 | 13.203 |
| 398 | ENSG00000146376 | ARHGAP18      | -1.2 | 0.0352435 | 0.0973816 | 3.893  | 0.709 | 3.436  | 4.709  | 4.741  | 0.037 | 4.719  | 4.784  |
| 399 | ENSG00000213390 | ARHGAP19      | -1.2 | 5.442E-07 | 1.164E-05 | 37.465 | 1.285 | 36.486 | 38.919 | 46.288 | 2.266 | 43.868 | 48.359 |
| 400 | ENSG00000107863 | ARHGAP21      | 1.4  | 2.16E-11  | 1.679E-09 | 17.870 | 0.614 | 17.164 | 18.272 | 13.045 | 0.560 | 12.433 | 13.532 |
| 401 | ENSG00000275832 | ARHGAP23      | 1.3  | 4.787E-07 | 1.044E-05 | 18.774 | 0.483 | 18.216 | 19.056 | 15.063 | 1.671 | 13.571 | 16.869 |
| 402 | ENSG00000145819 | ARHGAP26      | -1.2 | 0.0001113 | 0.000984  | 5.733  | 0.409 | 5.490  | 6.206  | 7.076  | 0.146 | 6.935  | 7.227  |
| 403 | ENSG00000031081 | ARHGAP31      | -1.3 | 0.0011867 | 0.0067475 | 1.899  | 0.118 | 1.762  | 1.968  | 2.495  | 0.057 | 2.436  | 2.550  |
| 404 | ENSG00000134909 | ARHGAP32      | -1.1 | 0.0202354 | 0.0636253 | 7.057  | 0.464 | 6.731  | 7.588  | 7.996  | 0.275 | 7.785  | 8.307  |
| 405 | ENSG00000004777 | ARHGAP33      | -1.3 | 0.002715  | 0.0130268 | 5.866  | 0.152 | 5.750  | 6.039  | 7.626  | 0.779 | 6.758  | 8.266  |
| 406 | ENSG00000160007 | ARHGAP35      | -1.1 | 0.0441942 | 0.1155647 | 28.116 | 0.725 | 27.505 | 28.917 | 30.511 | 1.342 | 28.984 | 31.502 |

|     | A               | B             | C    | D         | E         | F      | G     | H      | I      | J      | K     | L      | M      |
|-----|-----------------|---------------|------|-----------|-----------|--------|-------|--------|--------|--------|-------|--------|--------|
| 407 | ENSG00000124143 | ARHGAP40      | 1.6  | 0.026446  | 0.0782073 | 1.915  | 0.946 | 1.110  | 2.958  | 1.249  | 0.205 | 1.021  | 1.420  |
| 408 | ENSG00000180448 | ARHGAP45      | -1.2 | 0.0009556 | 0.0056412 | 10.280 | 0.608 | 9.577  | 10.634 | 12.694 | 1.625 | 11.228 | 14.441 |
| 409 | ENSG00000100852 | ARHGAP5       | -1.1 | 0.0031057 | 0.014507  | 30.806 | 0.883 | 29.864 | 31.616 | 34.795 | 2.233 | 33.191 | 37.346 |
| 410 | ENSG00000241484 | ARHGAP8       | -1.4 | 0.0040213 | 0.0178416 | 1.791  | 0.335 | 1.420  | 2.073  | 2.505  | 0.072 | 2.441  | 2.583  |
| 411 | ENSG00000123329 | ARHGAP9       | 1.4  | 0.0230894 | 0.0705186 | 1.676  | 0.254 | 1.411  | 1.918  | 1.264  | 0.041 | 1.220  | 1.302  |
| 412 | ENSG00000141522 | ARHGDI A      | 1.1  | 0.001553  | 0.0083253 | 74.567 | 4.094 | 70.669 | 78.832 | 67.531 | 1.887 | 65.533 | 69.283 |
| 413 | ENSG00000111348 | ARHGDI B      | 2.8  | 0.0013619 | 0.0074881 | 0.917  | 0.313 | 0.703  | 1.276  | 0.328  | 0.110 | 0.223  | 0.443  |
| 414 | ENSG00000076928 | ARHGEF1       | -1.1 | 0.0559577 | 0.1383353 | 12.680 | 0.284 | 12.352 | 12.857 | 14.068 | 0.273 | 13.798 | 14.343 |
| 415 | ENSG00000104728 | ARHGEF10      | -1.4 | 5.184E-06 | 7.657E-05 | 2.576  | 0.075 | 2.492  | 2.637  | 3.798  | 0.497 | 3.420  | 4.361  |
| 416 | ENSG00000074964 | ARHGEF10<br>L | -1.1 | 0.0045968 | 0.0198127 | 10.648 | 0.427 | 10.235 | 11.087 | 12.469 | 1.206 | 11.166 | 13.545 |
| 417 | ENSG00000132694 | ARHGEF11      | -1.1 | 0.048868  | 0.1249062 | 19.118 | 1.543 | 17.338 | 20.073 | 21.021 | 0.825 | 20.138 | 21.774 |
| 418 | ENSG00000196914 | ARHGEF12      | 1.1  | 0.0019019 | 0.0097862 | 12.247 | 0.267 | 11.953 | 12.475 | 11.393 | 0.184 | 11.194 | 11.557 |
| 419 | ENSG00000110237 | ARHGEF17      | -1.1 | 0.0585446 | 0.1429221 | 7.248  | 0.628 | 6.702  | 7.934  | 8.221  | 0.696 | 7.733  | 9.018  |
| 420 | ENSG00000142632 | ARHGEF19      | -1.3 | 4.715E-08 | 1.424E-06 | 29.561 | 0.905 | 28.780 | 30.553 | 39.920 | 3.726 | 37.299 | 44.184 |
| 421 | ENSG00000240771 | ARHGEF25      | 1.3  | 7.36E-05  | 0.0007048 | 10.795 | 0.510 | 10.250 | 11.261 | 8.290  | 0.271 | 8.099  | 8.601  |
| 422 | ENSG00000114790 | ARHGEF26      | 1.2  | 0.0006988 | 0.0043677 | 14.294 | 1.240 | 12.938 | 15.369 | 12.186 | 0.312 | 11.827 | 12.392 |
| 423 | ENSG00000183111 | ARHGEF37      | 2    | 0.0007491 | 0.0046123 | 0.779  | 0.124 | 0.672  | 0.915  | 0.387  | 0.066 | 0.313  | 0.441  |
| 424 | ENSG00000137135 | ARHGEF39      | -1.1 | 0.0250262 | 0.075046  | 13.869 | 0.561 | 13.233 | 14.296 | 15.618 | 0.314 | 15.300 | 15.928 |
| 425 | ENSG00000165801 | ARHGEF40      | 1.1  | 0.0006196 | 0.0039847 | 28.228 | 0.709 | 27.675 | 29.028 | 25.567 | 1.656 | 24.312 | 27.445 |
| 426 | ENSG00000129675 | ARHGEF6       | 1.1  | 0.0272672 | 0.0801058 | 7.292  | 0.484 | 6.981  | 7.850  | 6.585  | 0.165 | 6.407  | 6.733  |
| 427 | ENSG00000102606 | ARHGEF7       | -1.1 | 0.0331187 | 0.0931092 | 14.587 | 0.388 | 14.192 | 14.968 | 16.028 | 0.664 | 15.576 | 16.791 |
| 428 | ENSG00000131089 | ARHGEF9       | 1.2  | 0.0005779 | 0.0037665 | 10.223 | 0.636 | 9.488  | 10.602 | 9.018  | 0.365 | 8.653  | 9.383  |
| 429 | ENSG00000049618 | ARID1B        | -1.1 | 0.0002471 | 0.0018931 | 4.348  | 0.104 | 4.269  | 4.467  | 5.047  | 0.186 | 4.837  | 5.190  |
| 430 | ENSG00000189079 | ARID2         | -1.2 | 2.163E-06 | 3.626E-05 | 23.455 | 0.448 | 23.120 | 23.963 | 28.173 | 0.725 | 27.547 | 28.967 |
| 431 | ENSG00000116017 | ARID3A        | -1.1 | 0.0028297 | 0.013436  | 31.482 | 1.404 | 29.880 | 32.499 | 35.779 | 2.146 | 33.422 | 37.621 |
| 432 | ENSG00000179361 | ARID3B        | 1.1  | 0.0038292 | 0.0171375 | 69.674 | 1.372 | 68.439 | 71.151 | 65.430 | 1.895 | 64.033 | 67.587 |
| 433 | ENSG00000054267 | ARID4B        | -1.1 | 0.0504538 | 0.1278964 | 13.448 | 0.060 | 13.400 | 13.516 | 14.798 | 0.166 | 14.614 | 14.936 |

|     | A               | B          | C    | D         | E         | F       | G     | H       | I       | J       | K     | L       | M       |
|-----|-----------------|------------|------|-----------|-----------|---------|-------|---------|---------|---------|-------|---------|---------|
| 434 | ENSG00000150347 | ARID5B     | 2.5  | 0.0001652 | 0.0013666 | 0.417   | 0.046 | 0.365   | 0.452   | 0.168   | 0.054 | 0.123   | 0.228   |
| 435 | ENSG00000120805 | ARL1       | 1.1  | 0.0570203 | 0.1401722 | 53.479  | 0.517 | 52.906  | 53.910  | 51.361  | 1.713 | 49.411  | 52.619  |
| 436 | ENSG00000175414 | ARL10      | 1.1  | 0.0904106 | 0.1989738 | 7.946   | 0.205 | 7.710   | 8.087   | 7.550   | 0.411 | 7.224   | 8.012   |
| 437 | ENSG00000169379 | ARL13B     | 1.2  | 0.1244177 | 0.2495288 | 7.141   | 1.273 | 6.260   | 8.601   | 6.354   | 0.417 | 6.056   | 6.830   |
| 438 | ENSG00000185829 | ARL17A     | -1.2 | 0.0070071 | 0.0275221 | 8.164   | 0.325 | 7.866   | 8.510   | 9.885   | 0.877 | 8.907   | 10.601  |
| 440 | ENSG00000102931 | ARL2BP     | 1.3  | 2.716E-05 | 0.0003068 | 30.889  | 1.987 | 28.725  | 32.632  | 24.584  | 1.588 | 23.637  | 26.417  |
| 441 | ENSG00000138175 | ARL3       | -1.1 | 0.0008671 | 0.0052059 | 30.632  | 1.000 | 29.999  | 31.785  | 35.916  | 1.027 | 34.732  | 36.562  |
| 442 | ENSG00000122644 | ARL4A      | 1.1  | 0.0580936 | 0.1421906 | 16.592  | 1.543 | 15.264  | 18.285  | 15.295  | 0.591 | 14.733  | 15.911  |
| 443 | ENSG00000188042 | ARL4C      | 1.1  | 0.0473757 | 0.1218469 | 18.015  | 2.799 | 14.901  | 20.322  | 16.346  | 1.238 | 15.553  | 17.772  |
| 444 | ENSG00000170540 | ARL6IP1    | -1.1 | 0.0006399 | 0.0040858 | 166.816 | 8.595 | 158.373 | 175.555 | 188.985 | 3.328 | 185.165 | 191.254 |
| 445 | ENSG00000144746 | ARL6IP5    | 1.1  | 0.0608918 | 0.1473127 | 55.175  | 1.903 | 53.894  | 57.361  | 52.460  | 2.357 | 49.894  | 54.527  |
| 446 | ENSG00000177917 | ARL6IP6    | -1.2 | 0.0003567 | 0.0025405 | 34.142  | 0.792 | 33.231  | 34.674  | 40.994  | 4.289 | 36.773  | 45.347  |
| 447 | ENSG00000105676 | ARMC6      | 1.1  | 0.0899086 | 0.1980236 | 28.606  | 1.465 | 27.098  | 30.024  | 27.353  | 1.222 | 26.359  | 28.717  |
| 448 | ENSG00000135931 | ARMC9      | 1.1  | 0.0398611 | 0.1066726 | 7.417   | 0.449 | 6.954   | 7.849   | 6.810   | 0.402 | 6.461   | 7.250   |
| 449 | ENSG00000198960 | ARMCX6     | 1.1  | 0.0371584 | 0.1011198 | 16.822  | 0.537 | 16.204  | 17.179  | 15.268  | 0.368 | 15.041  | 15.692  |
| 450 | ENSG00000146476 | ARMT1      | 1.2  | 3.621E-06 | 5.629E-05 | 76.262  | 4.278 | 71.559  | 79.924  | 65.137  | 1.240 | 63.969  | 66.439  |
| 451 | ENSG00000143437 | ARNT       | -1.1 | 0.0010161 | 0.0059542 | 19.300  | 0.202 | 19.079  | 19.476  | 22.451  | 1.102 | 21.689  | 23.714  |
| 452 | ENSG00000172379 | ARNT2      | 1.3  | 0.0003108 | 0.0022723 | 3.961   | 0.047 | 3.912   | 4.005   | 3.122   | 0.090 | 3.031   | 3.210   |
| 453 | ENSG00000029153 | ARNTL2     | 1.2  | 0.0066555 | 0.0264421 | 8.747   | 0.994 | 7.638   | 9.557   | 7.661   | 0.568 | 7.005   | 7.996   |
| 454 | ENSG00000163466 | ARPC2      | 1    | 0.1004195 | 0.213823  | 74.028  | 2.193 | 72.316  | 76.500  | 72.409  | 1.944 | 70.191  | 73.816  |
| 455 | ENSG00000226284 | ARPC3P1    | 1.2  | 0.0667144 | 0.1580087 | 23.496  | 4.466 | 20.326  | 28.603  | 19.735  | 0.948 | 18.730  | 20.612  |
| 456 | ENSG00000241553 | ARPC4      | 1.1  | 0.0383471 | 0.1034722 | 37.896  | 1.199 | 36.707  | 39.104  | 35.851  | 1.331 | 34.852  | 37.361  |
| 457 | ENSG00000162704 | ARPC5      | 1.2  | 8.304E-09 | 3.161E-07 | 31.586  | 0.245 | 31.415  | 31.866  | 25.940  | 0.773 | 25.048  | 26.422  |
| 458 | ENSG00000136950 | ARPC5L     | 1.1  | 0.0704932 | 0.1646755 | 26.926  | 1.680 | 25.670  | 28.834  | 25.492  | 0.448 | 25.056  | 25.951  |
| 459 | ENSG00000242498 | ARPIN      | 1.3  | 0.0001006 | 0.000908  | 9.448   | 0.960 | 8.676   | 10.523  | 7.682   | 0.548 | 7.127   | 8.222   |
| 460 | ENSG00000128989 | ARPP19     | -1.1 | 0.0047029 | 0.0201816 | 135.714 | 3.006 | 132.902 | 138.883 | 150.187 | 6.285 | 143.355 | 155.724 |
| 461 | ENSG00000137486 | ARRB1      | 1.6  | 1.837E-05 | 0.0002212 | 15.750  | 3.339 | 13.472  | 19.583  | 9.941   | 0.484 | 9.593   | 10.493  |
| 462 | ENSG00000203993 | ARRDC1-AS1 | -1.2 | 0.0018441 | 0.009541  | 19.322  | 0.727 | 18.865  | 20.160  | 23.751  | 2.347 | 21.044  | 25.226  |
| 463 | ENSG00000281357 | ARRDC3-AS1 | 1.3  | 0.0349423 | 0.0968502 | 2.545   | 0.262 | 2.294   | 2.817   | 1.948   | 0.167 | 1.827   | 2.139   |
| 464 | ENSG00000100299 | ARSA       | -1.2 | 0.113725  | 0.2335939 | 5.591   | 0.153 | 5.438   | 5.744   | 6.606   | 0.636 | 5.879   | 7.058   |
| 465 | ENSG00000113273 | ARSB       | 1.2  | 0.0020334 | 0.0102938 | 7.966   | 0.409 | 7.626   | 8.420   | 6.720   | 0.497 | 6.221   | 7.215   |
| 466 | ENSG00000006756 | ARSD       | 1.2  | 0.0155895 | 0.0520121 | 6.228   | 0.632 | 5.566   | 6.824   | 5.374   | 0.599 | 4.716   | 5.887   |
| 467 | ENSG00000141337 | ARSG       | 1.2  | 0.0893558 | 0.1970115 | 1.657   | 0.203 | 1.435   | 1.832   | 1.412   | 0.192 | 1.226   | 1.609   |
| 468 | ENSG00000183876 | ARSI       | -1.4 | 0.0111641 | 0.0398099 | 2.660   | 0.764 | 1.943   | 3.464   | 3.728   | 0.558 | 3.369   | 4.371   |
| 469 | ENSG00000164291 | ARSK       | -1.2 | 0.0032049 | 0.0148545 | 7.485   | 0.581 | 6.884   | 8.043   | 9.288   | 0.651 | 8.640   | 9.942   |
| 470 | ENSG00000173409 | ARV1       | 1.1  | 0.0717444 | 0.1669423 | 18.489  | 0.660 | 17.759  | 19.045  | 16.837  | 1.233 | 15.454  | 17.820  |
| 471 | ENSG00000099889 | ARVCF      | -1.2 | 4.225E-05 | 0.0004455 | 19.428  | 1.230 | 18.530  | 20.829  | 24.624  | 2.678 | 22.490  | 27.629  |
| 472 | ENSG00000104763 | ASAH1      | 1.2  | 3.161E-06 | 4.987E-05 | 20.125  | 0.676 | 19.347  | 20.565  | 17.000  | 1.413 | 15.754  | 18.536  |
| 473 | ENSG00000204147 | ASAH2B     | 1.1  | 0.1123874 | 0.2318138 | 7.799   | 0.135 | 7.663   | 7.932   | 7.203   | 0.718 | 6.451   | 7.882   |
| 474 | ENSG00000153317 | ASAP1      | 1.2  | 0.0006744 | 0.0042518 | 16.769  | 0.911 | 15.781  | 17.575  | 14.904  | 0.548 | 14.469  | 15.520  |
| 475 | ENSG00000151693 | ASAP2      | -1.2 | 5.241E-05 | 0.0005317 | 11.855  | 0.645 | 11.292  | 12.559  | 14.775  | 0.027 | 14.759  | 14.806  |

|     | A               | B             | C    | D         | E         | F       | G      | H       | I       | J       | K     | L       | M       |
|-----|-----------------|---------------|------|-----------|-----------|---------|--------|---------|---------|---------|-------|---------|---------|
| 476 | ENSG00000088280 | ASAP3         | -1.1 | 0.0151195 | 0.0507474 | 26.107  | 1.818  | 24.094  | 27.629  | 29.396  | 1.404 | 28.301  | 30.979  |
| 477 | ENSG00000065802 | ASB1          | -1.1 | 0.0169685 | 0.0555427 | 17.870  | 0.348  | 17.554  | 18.243  | 20.051  | 1.412 | 18.569  | 21.381  |
| 478 | ENSG00000115239 | ASB3          | -1.3 | 0.0740936 | 0.1709379 | 0.921   | 0.156  | 0.757   | 1.067   | 1.233   | 0.386 | 0.937   | 1.669   |
| 479 | ENSG00000138303 | ASCC1         | -1.1 | 0.1099465 | 0.2283885 | 16.094  | 0.577  | 15.709  | 16.757  | 17.593  | 0.721 | 16.760  | 18.015  |
| 480 | ENSG00000112249 | ASCC3         | 1    | 0.0927667 | 0.2024992 | 67.752  | 3.442  | 64.542  | 71.387  | 66.031  | 2.868 | 62.723  | 67.830  |
| 481 | ENSG00000111875 | ASF1A         | 1.1  | 0.0013493 | 0.0074337 | 49.707  | 0.167  | 49.567  | 49.892  | 44.330  | 0.451 | 43.893  | 44.794  |
| 483 | ENSG00000141505 | ASGR1         | -1.2 | 0.0273754 | 0.0803819 | 5.179   | 0.668  | 4.451   | 5.764   | 6.312   | 0.207 | 6.091   | 6.501   |
| 484 | ENSG00000116539 | ASH1L         | -1.1 | 0.035014  | 0.0969852 | 14.323  | 0.511  | 13.754  | 14.745  | 15.754  | 0.326 | 15.535  | 16.129  |
| 485 | ENSG00000108684 | ASIC2         | -1.4 | 0.1126947 | 0.2322415 | 0.336   | 0.121  | 0.211   | 0.453   | 0.489   | 0.175 | 0.298   | 0.643   |
| 486 | ENSG00000169093 | ASMTL         | -1.2 | 9.524E-06 | 0.0001282 | 56.936  | 5.324  | 51.082  | 61.489  | 70.503  | 4.928 | 67.545  | 76.192  |
| 487 | ENSG00000236017 | ASMTL-<br>AS1 | -1.4 | 0.0100432 | 0.0365686 | 3.881   | 0.710  | 3.125   | 4.534   | 5.744   | 0.552 | 5.351   | 6.375   |
| 488 | ENSG00000070669 | ASNS          | 1.5  | 1.61E-16  | 4.62E-14  | 164.006 | 4.802  | 158.830 | 168.317 | 110.604 | 8.188 | 101.773 | 117.945 |
| 489 | ENSG00000166183 | ASPG          | -1.3 | 0.0868469 | 0.1929826 | 0.910   | 0.384  | 0.511   | 1.278   | 1.218   | 0.154 | 1.090   | 1.390   |
| 490 | ENSG00000174939 | ASPHD1        | -1.1 | 0.074268  | 0.1712001 | 12.879  | 1.082  | 11.630  | 13.538  | 14.916  | 1.926 | 12.993  | 16.844  |
| 491 | ENSG00000066279 | ASPM          | -1.3 | 0.0285022 | 0.0829847 | 43.022  | 7.536  | 38.084  | 51.697  | 55.080  | 5.667 | 49.698  | 60.994  |
| 492 | ENSG00000244617 | ASPRV1        | -2.1 | 0.0058483 | 0.0239149 | 0.567   | 0.139  | 0.411   | 0.679   | 1.225   | 0.523 | 0.642   | 1.652   |
| 493 | ENSG00000130707 | ASS1          | 1.1  | 0.0122212 | 0.042901  | 73.420  | 5.734  | 68.948  | 79.885  | 68.543  | 1.132 | 67.357  | 69.610  |
| 494 | ENSG00000188886 | ASTL          | -1.5 | 0.0582882 | 0.1425432 | 1.314   | 0.365  | 0.893   | 1.531   | 2.020   | 0.290 | 1.797   | 2.347   |
| 495 | ENSG00000156802 | ATAD2         | -1.1 | 0.0015808 | 0.0084474 | 24.759  | 1.698  | 22.817  | 25.965  | 28.555  | 1.325 | 27.032  | 29.443  |
| 496 | ENSG00000215915 | ATAD3C        | 1.5  | 0.0003577 | 0.0025454 | 3.463   | 0.490  | 2.901   | 3.796   | 2.347   | 0.151 | 2.228   | 2.517   |
| 497 | ENSG00000176208 | ATAD5         | -1.2 | 8.554E-05 | 0.0007949 | 24.921  | 0.261  | 24.620  | 25.080  | 30.236  | 1.887 | 28.404  | 32.174  |
| 498 | ENSG00000162772 | ATF3          | 1.4  | 1.228E-08 | 4.43E-07  | 20.915  | 1.865  | 18.894  | 22.569  | 15.170  | 0.168 | 14.995  | 15.330  |
| 500 | ENSG00000128272 | ATF4          | 1.3  | 9.00E-11  | 5.879E-09 | 329.018 | 10.188 | 319.721 | 339.908 | 268.117 | 7.512 | 261.627 | 276.345 |
| 501 | ENSG00000228218 | ATF4P3        | 1.3  | 0.0126212 | 0.0439404 | 10.016  | 1.954  | 8.254   | 12.118  | 7.586   | 0.563 | 6.936   | 7.929   |
| 502 | ENSG00000256167 | ATF4P4        | 1.4  | 0.0067085 | 0.0266027 | 4.379   | 0.313  | 4.115   | 4.726   | 3.187   | 0.601 | 2.660   | 3.841   |
| 503 | ENSG00000169136 | ATF5          | 2.5  | 6.74E-16  | 1.54E-13  | 17.486  | 1.562  | 15.694  | 18.560  | 7.273   | 0.380 | 6.836   | 7.518   |
| 504 | ENSG00000213676 | ATF6B         | 1.1  | 0.083752  | 0.1880389 | 29.692  | 0.474  | 29.206  | 30.153  | 28.106  | 0.853 | 27.176  | 28.853  |
| 505 | ENSG00000171681 | ATF7IP        | -1.2 | 5.688E-08 | 1.667E-06 | 53.615  | 0.179  | 53.409  | 53.725  | 64.852  | 1.489 | 63.161  | 65.963  |
| 506 | ENSG00000145782 | ATG12         | -1.1 | 0.0750423 | 0.1725406 | 21.121  | 0.277  | 20.898  | 21.431  | 23.136  | 1.831 | 21.963  | 25.245  |
| 507 | ENSG00000085978 | ATG16L1       | -1.1 | 0.0228123 | 0.0698831 | 20.681  | 0.444  | 20.401  | 21.193  | 23.042  | 0.348 | 22.760  | 23.431  |
| 508 | ENSG00000168010 | ATG16L2       | -1.3 | 0.0006877 | 0.0043124 | 4.359   | 0.497  | 3.925   | 4.900   | 5.602   | 0.097 | 5.539   | 5.713   |
| 509 | ENSG00000110046 | ATG2A         | -1.2 | 0.001999  | 0.0101744 | 8.253   | 0.334  | 7.870   | 8.485   | 10.078  | 0.910 | 9.215   | 11.029  |
| 510 | ENSG00000066739 | ATG2B         | 1.1  | 0.0276335 | 0.0809291 | 10.072  | 0.472  | 9.791   | 10.617  | 9.406   | 0.511 | 9.080   | 9.994   |
| 511 | ENSG00000144848 | ATG3          | 1.1  | 0.1142146 | 0.2342604 | 17.766  | 0.373  | 17.431  | 18.169  | 17.069  | 0.796 | 16.214  | 17.787  |
| 512 | ENSG00000101844 | ATG4A         | 1.4  | 0.0002037 | 0.0016182 | 6.241   | 0.604  | 5.653   | 6.860   | 4.425   | 0.286 | 4.245   | 4.756   |
| 513 | ENSG00000168397 | ATG4B         | -1.1 | 0.0510191 | 0.1289622 | 26.041  | 0.131  | 25.890  | 26.125  | 28.515  | 1.926 | 26.700  | 30.535  |
| 514 | ENSG00000130734 | ATG4D         | -1.2 | 0.0048775 | 0.0207634 | 18.205  | 0.412  | 17.789  | 18.613  | 22.346  | 2.889 | 20.111  | 25.609  |
| 515 | ENSG00000119787 | ATL2          | -1.1 | 0.0005045 | 0.0033833 | 59.934  | 2.664  | 56.952  | 62.078  | 68.960  | 3.327 | 65.280  | 71.757  |
| 516 | ENSG00000166454 | ATMIN         | 1.1  | 0.0039607 | 0.0176376 | 31.177  | 0.476  | 30.899  | 31.727  | 28.810  | 1.055 | 27.698  | 29.798  |
| 517 | ENSG00000111676 | ATN1          | -1.2 | 0.000259  | 0.0019663 | 37.247  | 2.346  | 34.539  | 38.657  | 44.213  | 2.393 | 41.483  | 45.948  |
| 518 | ENSG00000118322 | ATP10B        | -1.7 | 0.0944868 | 0.2052556 | 0.074   | 0.030  | 0.039   | 0.092   | 0.127   | 0.022 | 0.110   | 0.152   |
| 519 | ENSG00000145246 | ATP10D        | 1.2  | 0.0183288 | 0.0589343 | 2.182   | 0.182  | 2.059   | 2.391   | 1.793   | 0.225 | 1.657   | 2.053   |

|     | A                | B        | C    | D         | E         | F       | G      | H       | I       | J       | K      | L       | M       |
|-----|------------------|----------|------|-----------|-----------|---------|--------|---------|---------|---------|--------|---------|---------|
| 520 | ENSG00000068650  | ATP11A   | -1.6 | 4.71E-17  | 1.53E-14  | 15.884  | 0.428  | 15.406  | 16.234  | 25.608  | 1.114  | 24.572  | 26.786  |
| 521 | ENSG000000101974 | ATP11C   | 1    | 0.1126441 | 0.2321654 | 50.530  | 0.896  | 49.541  | 51.288  | 49.300  | 1.408  | 47.743  | 50.486  |
| 522 | ENSG000000105726 | ATP13A1  | -1.2 | 2.349E-05 | 0.0002726 | 9.497   | 0.363  | 9.172   | 9.890   | 11.963  | 0.945  | 11.013  | 12.903  |
| 523 | ENSG000000163399 | ATP1A1   | -1.1 | 0.0052221 | 0.0218183 | 145.122 | 1.915  | 142.912 | 146.234 | 159.049 | 2.519  | 156.176 | 160.879 |
| 524 | ENSG00000018625  | ATP1A2   | -1.3 | 3.282E-10 | 1.857E-08 | 40.380  | 1.126  | 39.080  | 41.052  | 53.353  | 1.546  | 51.645  | 54.658  |
| 525 | ENSG000000105409 | ATP1A3   | -1.3 | 6.098E-05 | 0.0006032 | 9.451   | 0.812  | 8.657   | 10.281  | 12.472  | 1.427  | 10.824  | 13.322  |
| 526 | ENSG000000143153 | ATP1B1   | 1.2  | 5.868E-06 | 8.505E-05 | 53.620  | 2.022  | 52.160  | 55.928  | 45.071  | 3.004  | 42.717  | 48.455  |
| 527 | ENSG000000129244 | ATP1B2   | -1.5 | 7.333E-08 | 2.067E-06 | 13.687  | 2.323  | 11.087  | 15.559  | 21.512  | 1.214  | 20.526  | 22.868  |
| 528 | ENSG000000166896 | ATP23    | 1.2  | 0.0368164 | 0.1004964 | 16.720  | 0.639  | 16.168  | 17.421  | 14.434  | 0.371  | 14.011  | 14.704  |
| 529 | ENSG000000196296 | ATP2A1   | -1.5 | 0.0034401 | 0.0157294 | 1.604   | 0.198  | 1.385   | 1.770   | 2.428   | 0.604  | 1.783   | 2.979   |
| 530 | ENSG000000174437 | ATP2A2   | 1.2  | 9.228E-07 | 1.788E-05 | 80.889  | 1.675  | 78.964  | 82.013  | 71.813  | 1.833  | 69.705  | 73.028  |
| 531 | ENSG00000058668  | ATP2B4   | -1.1 | 0.0154818 | 0.0517069 | 17.136  | 1.594  | 15.370  | 18.468  | 19.377  | 1.482  | 17.666  | 20.241  |
| 532 | ENSG00000017260  | ATP2C1   | 1.1  | 0.0064278 | 0.0257127 | 44.499  | 0.875  | 43.527  | 45.224  | 42.069  | 1.514  | 40.524  | 43.549  |
| 533 | ENSG000000152234 | ATP5A1   | -1.1 | 0.0007681 | 0.0047069 | 170.861 | 1.479  | 169.855 | 172.559 | 190.823 | 6.003  | 183.941 | 194.986 |
| 534 | ENSG000000110955 | ATP5B    | -1.1 | 0.0001153 | 0.0010154 | 824.520 | 6.462  | 817.069 | 828.602 | 929.952 | 21.091 | 909.541 | 951.663 |
| 535 | ENSG00000099624  | ATP5D    | -1.1 | 0.0381561 | 0.103105  | 35.218  | 1.103  | 34.473  | 36.485  | 40.910  | 7.109  | 34.994  | 48.796  |
| 536 | ENSG000000124172 | ATP5E    | -1.1 | 0.0002377 | 0.0018354 | 52.222  | 0.680  | 51.677  | 52.985  | 60.111  | 1.217  | 59.405  | 61.516  |
| 537 | ENSG000000159199 | ATP5G1   | -1.1 | 0.0079957 | 0.0305816 | 51.822  | 1.482  | 50.198  | 53.099  | 58.656  | 0.829  | 57.820  | 59.477  |
| 538 | ENSG000000135390 | ATP5G2   | -1.1 | 7.218E-05 | 0.0006929 | 119.875 | 3.946  | 115.552 | 123.283 | 139.598 | 8.045  | 130.821 | 146.622 |
| 539 | ENSG000000167863 | ATP5H    | 1.1  | 0.0006173 | 0.0039727 | 119.153 | 4.280  | 114.223 | 121.918 | 109.422 | 3.624  | 105.835 | 113.082 |
| 540 | ENSG000000169020 | ATP5I    | -1.1 | 0.0026395 | 0.0127293 | 258.693 | 8.013  | 249.586 | 264.661 | 294.131 | 15.685 | 276.028 | 303.660 |
| 541 | ENSG000000241468 | ATP5J2   | -1.1 | 0.0286664 | 0.0833193 | 65.538  | 2.336  | 63.949  | 68.220  | 72.782  | 4.054  | 68.515  | 76.584  |
| 542 | ENSG000000125375 | ATP5S    | 1.1  | 0.0578772 | 0.1418393 | 5.899   | 0.320  | 5.552   | 6.182   | 5.469   | 0.174  | 5.289   | 5.635   |
| 543 | ENSG00000071553  | ATP6AP1  | 1.1  | 0.0030058 | 0.0141173 | 23.757  | 0.147  | 23.595  | 23.882  | 21.501  | 0.391  | 21.177  | 21.936  |
| 544 | ENSG000000205464 | ATP6AP1L | -1.4 | 0.0014886 | 0.0080362 | 1.883   | 0.178  | 1.686   | 2.032   | 2.636   | 0.360  | 2.220   | 2.857   |
| 545 | ENSG00000033627  | ATP6V0A1 | 1.2  | 0.0001904 | 0.0015335 | 12.694  | 1.738  | 10.715  | 13.972  | 10.666  | 0.477  | 10.264  | 11.193  |
| 546 | ENSG000000185344 | ATP6V0A2 | 1.2  | 9.031E-06 | 0.0001222 | 10.712  | 0.269  | 10.407  | 10.912  | 8.978   | 0.720  | 8.217   | 9.649   |
| 547 | ENSG000000105929 | ATP6V0A4 | -1.5 | 0.0493088 | 0.125729  | 0.550   | 0.095  | 0.443   | 0.623   | 0.828   | 0.119  | 0.737   | 0.962   |
| 548 | ENSG000000159720 | ATP6V0D1 | 1.4  | 3.389E-07 | 7.745E-06 | 11.284  | 0.489  | 10.831  | 11.802  | 8.504   | 0.122  | 8.413   | 8.642   |
| 549 | ENSG000000113732 | ATP6V0E1 | 1.4  | 1.468E-10 | 9.229E-09 | 78.998  | 2.182  | 76.833  | 81.198  | 56.801  | 3.083  | 54.924  | 60.359  |
| 550 | ENSG000000171130 | ATP6V0E2 | 1.2  | 0.0141893 | 0.048306  | 9.194   | 0.432  | 8.721   | 9.569   | 7.928   | 0.173  | 7.756   | 8.103   |
| 551 | ENSG000000155097 | ATP6V1C1 | 1.2  | 3.882E-05 | 0.0004145 | 38.767  | 3.364  | 36.285  | 42.595  | 33.529  | 1.767  | 32.222  | 35.539  |
| 552 | ENSG000000100554 | ATP6V1D  | 1.3  | 2.397E-08 | 7.95E-07  | 36.687  | 0.971  | 35.678  | 37.614  | 29.454  | 0.072  | 29.372  | 29.506  |
| 553 | ENSG000000131100 | ATP6V1E1 | 1.1  | 0.0050021 | 0.0211556 | 79.979  | 2.108  | 77.623  | 81.689  | 74.771  | 1.519  | 73.052  | 75.933  |
| 554 | ENSG000000250565 | ATP6V1E2 | 1.2  | 0.0714673 | 0.1663996 | 2.972   | 0.169  | 2.795   | 3.130   | 2.566   | 0.112  | 2.440   | 2.654   |
| 555 | ENSG000000136888 | ATP6V1G1 | 1.2  | 3.154E-07 | 7.278E-06 | 228.270 | 14.368 | 218.157 | 244.717 | 188.806 | 6.473  | 181.447 | 193.614 |
| 556 | ENSG00000047249  | ATP6V1H  | 1.4  | 1.531E-09 | 7.175E-08 | 22.127  | 0.559  | 21.494  | 22.553  | 16.237  | 1.053  | 15.607  | 17.453  |
| 557 | ENSG000000165240 | ATP7A    | 1.1  | 0.1119192 | 0.2312327 | 2.061   | 0.188  | 1.904   | 2.269   | 1.843   | 0.221  | 1.675   | 2.094   |

|     | A               | B         | C    | D         | E         | F       | G     | H       | I       | J       | K      | L       | M       |
|-----|-----------------|-----------|------|-----------|-----------|---------|-------|---------|---------|---------|--------|---------|---------|
| 558 | ENSG00000123191 | ATP7B     | -1.2 | 0.0018423 | 0.0095376 | 3.962   | 0.191 | 3.758   | 4.137   | 4.882   | 0.055  | 4.849   | 4.946   |
| 559 | ENSG00000132932 | ATP8A2    | 1.7  | 5.95E-11  | 4.088E-09 | 6.777   | 0.654 | 6.022   | 7.187   | 4.104   | 0.435  | 3.608   | 4.423   |
| 560 | ENSG00000130270 | ATP8B3    | 1.1  | 0.0763443 | 0.1747715 | 6.209   | 0.308 | 5.856   | 6.415   | 5.709   | 0.141  | 5.597   | 5.867   |
| 561 | ENSG00000054793 | ATP9A     | 1.3  | 0.0043877 | 0.0191032 | 6.324   | 0.761 | 5.450   | 6.843   | 4.915   | 0.879  | 3.953   | 5.676   |
| 562 | ENSG00000166377 | ATP9B     | 1.2  | 0.0022828 | 0.0112695 | 3.127   | 0.152 | 2.972   | 3.277   | 2.662   | 0.107  | 2.566   | 2.777   |
| 563 | ENSG00000123472 | ATPAF1    | 1.2  | 0.0001699 | 0.0013969 | 37.274  | 1.242 | 36.411  | 38.698  | 33.026  | 1.271  | 32.072  | 34.468  |
| 564 | ENSG00000171953 | ATPAF2    | 1.4  | 9.953E-06 | 0.0001331 | 6.114   | 0.205 | 5.891   | 6.293   | 4.467   | 0.461  | 4.019   | 4.940   |
| 565 | ENSG00000175054 | ATR       | 1.1  | 0.1114468 | 0.2304843 | 13.958  | 0.451 | 13.449  | 14.308  | 13.515  | 0.557  | 12.875  | 13.889  |
| 566 | ENSG00000088812 | ATRN      | 1.1  | 0.0105842 | 0.0381684 | 20.205  | 0.777 | 19.600  | 21.082  | 18.741  | 1.219  | 17.334  | 19.467  |
| 567 | ENSG00000085224 | ATRX      | -1.1 | 0.0004523 | 0.0030811 | 32.620  | 0.872 | 32.086  | 33.626  | 37.756  | 0.922  | 36.890  | 38.726  |
| 568 | ENSG00000124788 | ATXN1     | 1.1  | 0.120768  | 0.2440322 | 1.183   | 0.165 | 0.994   | 1.299   | 1.053   | 0.041  | 1.012   | 1.093   |
| 569 | ENSG00000130638 | ATXN10    | -1.1 | 0.0709018 | 0.1653358 | 89.260  | 1.660 | 87.919  | 91.116  | 95.958  | 2.178  | 93.779  | 98.134  |
| 570 | ENSG00000224470 | ATXN1L    | -1.1 | 0.0140332 | 0.0478516 | 15.899  | 0.481 | 15.383  | 16.334  | 17.788  | 0.436  | 17.339  | 18.209  |
| 571 | ENSG00000066427 | ATXN3     | -1.1 | 0.0220507 | 0.0679809 | 3.948   | 0.051 | 3.893   | 3.995   | 4.434   | 0.264  | 4.218   | 4.728   |
| 572 | ENSG00000146776 | ATXN7L1   | -1.1 | 0.1124755 | 0.2318999 | 9.835   | 0.540 | 9.351   | 10.417  | 10.841  | 0.551  | 10.281  | 11.383  |
| 573 | ENSG00000087586 | AURKA     | -1.4 | 1.19E-11  | 9.846E-10 | 95.230  | 4.730 | 91.182  | 100.430 | 133.835 | 10.690 | 122.415 | 143.604 |
| 574 | ENSG00000178999 | AURKB     | -1.3 | 3.035E-08 | 9.723E-07 | 102.438 | 3.739 | 98.693  | 106.171 | 132.970 | 8.767  | 126.332 | 142.908 |
| 575 | ENSG00000158321 | AUTS2     | -1.3 | 1.472E-07 | 3.813E-06 | 23.881  | 1.451 | 22.501  | 25.394  | 30.535  | 1.514  | 28.941  | 31.954  |
| 576 | ENSG00000169857 | AVEN      | 1.1  | 0.0239451 | 0.0725387 | 28.395  | 1.602 | 26.616  | 29.725  | 25.457  | 2.001  | 23.353  | 27.335  |
| 577 | ENSG00000168646 | AXIN2     | -1.4 | 1.659E-06 | 2.888E-05 | 5.934   | 0.536 | 5.315   | 6.244   | 8.691   | 0.284  | 8.410   | 8.978   |
| 578 | ENSG00000167601 | AXL       | 1.4  | 3.753E-10 | 2.074E-08 | 50.482  | 3.166 | 47.954  | 54.034  | 37.477  | 1.483  | 36.309  | 39.145  |
| 579 | ENSG00000155096 | AZIN1     | 1.5  | 1.05E-17  | 4.15E-15  | 201.850 | 3.687 | 198.879 | 205.976 | 139.112 | 4.955  | 135.644 | 144.787 |
| 580 | ENSG00000253320 | AZIN1-AS1 | 1.2  | 0.0367888 | 0.1004778 | 3.020   | 0.199 | 2.799   | 3.185   | 2.480   | 0.280  | 2.286   | 2.800   |
| 581 | ENSG00000166710 | B2M       | 1.4  | 2.03E-11  | 1.579E-09 | 48.771  | 0.939 | 47.761  | 49.619  | 36.750  | 1.230  | 35.395  | 37.796  |
| 582 | ENSG00000169255 | B3GALNT1  | 1.4  | 1.452E-05 | 0.0001818 | 8.416   | 0.356 | 8.048   | 8.759   | 6.168   | 0.221  | 6.024   | 6.423   |
| 583 | ENSG00000183778 | B3GALT5   | 1.2  | 1.022E-06 | 1.938E-05 | 16.548  | 1.046 | 15.415  | 17.478  | 13.942  | 0.289  | 13.740  | 14.273  |
| 584 | ENSG00000187676 | B3GLCT    | 1.4  | 0.0002393 | 0.0018451 | 5.385   | 0.099 | 5.274   | 5.465   | 4.043   | 0.396  | 3.597   | 4.349   |
| 585 | ENSG00000170340 | B3GNT2    | -1.1 | 0.0471159 | 0.1214189 | 58.309  | 3.292 | 55.615  | 61.979  | 64.763  | 4.186  | 60.090  | 68.168  |
| 586 | ENSG00000179913 | B3GNT3    | -2   | 6.006E-05 | 0.0005965 | 1.373   | 0.136 | 1.219   | 1.477   | 2.812   | 0.570  | 2.430   | 3.466   |
| 587 | ENSG00000135454 | B4GALNT1  | 2.7  | 0.0003355 | 0.0024136 | 0.426   | 0.039 | 0.388   | 0.465   | 0.158   | 0.048  | 0.104   | 0.195   |
| 588 | ENSG00000182272 | B4GALNT4  | -1.3 | 1.444E-06 | 2.576E-05 | 21.396  | 1.941 | 19.916  | 23.593  | 29.148  | 0.295  | 28.931  | 29.483  |
| 589 | ENSG00000086062 | B4GALT1   | -1.1 | 0.0030592 | 0.0143168 | 15.755  | 0.221 | 15.503  | 15.916  | 18.359  | 0.492  | 17.843  | 18.822  |
| 590 | ENSG00000121578 | B4GALT4   | -1.2 | 8.04E-07  | 1.588E-05 | 23.817  | 1.208 | 23.062  | 25.210  | 29.982  | 1.569  | 28.321  | 31.439  |
| 591 | ENSG00000158470 | B4GALT5   | -1.1 | 0.001079  | 0.0062559 | 79.512  | 2.298 | 77.449  | 81.989  | 89.732  | 4.452  | 85.675  | 94.495  |
| 592 | ENSG00000118276 | B4GALT6   | 1.1  | 0.0792885 | 0.1801812 | 23.371  | 2.076 | 22.126  | 25.767  | 22.012  | 1.492  | 20.459  | 23.433  |
| 593 | ENSG00000108641 | B9D1      | -1.2 | 0.001758  | 0.0092109 | 12.069  | 0.475 | 11.787  | 12.618  | 14.843  | 1.052  | 14.121  | 16.050  |
| 594 | ENSG00000164929 | BAALC     | 1.5  | 0.0314265 | 0.0894842 | 1.309   | 0.404 | 1.035   | 1.773   | 0.917   | 0.278  | 0.661   | 1.213   |
| 595 | ENSG00000186318 | BACE1     | 1.2  | 0.0084709 | 0.0319156 | 5.859   | 0.524 | 5.257   | 6.216   | 5.035   | 0.407  | 4.573   | 5.335   |
| 596 | ENSG00000156273 | BACH1     | 1.1  | 0.1117278 | 0.230987  | 22.941  | 1.424 | 22.028  | 24.582  | 22.150  | 1.301  | 20.648  | 22.922  |

|     | A               | B          | C    | D         | E         | F       | G     | H       | I       | J       | K     | L       | M       |
|-----|-----------------|------------|------|-----------|-----------|---------|-------|---------|---------|---------|-------|---------|---------|
| 598 | ENSG00000112182 | BACH2      | 1.8  | 4.918E-09 | 2.024E-07 | 3.466   | 0.512 | 3.002   | 4.016   | 2.005   | 0.158 | 1.859   | 2.174   |
| 599 | ENSG00000112208 | BAG2       | 1.3  | 2.365E-05 | 0.0002741 | 10.977  | 0.815 | 10.058  | 11.610  | 8.869   | 0.469 | 8.559   | 9.410   |
| 600 | ENSG00000151929 | BAG3       | 1.1  | 0.0684008 | 0.1608988 | 17.958  | 0.689 | 17.360  | 18.711  | 16.613  | 0.953 | 15.603  | 17.497  |
| 601 | ENSG00000156735 | BAG4       | -1.1 | 0.0057209 | 0.0235019 | 25.128  | 0.843 | 24.485  | 26.083  | 28.660  | 0.255 | 28.474  | 28.951  |
| 602 | ENSG00000204463 | BAG6       | -1.1 | 0.0086138 | 0.0323172 | 96.449  | 5.106 | 90.589  | 99.940  | 107.005 | 4.924 | 104.061 | 112.690 |
| 603 | ENSG00000140320 | BAHD1      | 1.1  | 0.0915214 | 0.200759  | 30.610  | 2.575 | 27.705  | 32.613  | 29.210  | 1.921 | 27.782  | 31.394  |
| 604 | ENSG00000226137 | BAIAP2-AS1 | 1.2  | 0.0006823 | 0.0042883 | 8.161   | 0.171 | 8.022   | 8.352   | 6.686   | 0.156 | 6.538   | 6.848   |
| 605 | ENSG00000006453 | BAIAP2L1   | -1.2 | 3.479E-05 | 0.0003779 | 22.350  | 0.605 | 21.879  | 23.032  | 27.292  | 1.559 | 25.635  | 28.730  |
| 606 | ENSG00000030110 | BAK1       | 1.1  | 0.1167    | 0.2380591 | 45.773  | 1.273 | 44.520  | 47.065  | 43.663  | 4.052 | 40.364  | 48.185  |
| 607 | ENSG00000175730 | BAK1P1     | 1.3  | 0.0174613 | 0.056684  | 26.281  | 4.676 | 21.357  | 30.663  | 21.287  | 2.064 | 19.657  | 23.607  |
| 608 | ENSG00000095739 | BAMBI      | 1.3  | 6.504E-05 | 0.0006362 | 14.742  | 0.649 | 14.036  | 15.313  | 11.506  | 0.483 | 10.949  | 11.812  |
| 609 | ENSG00000175334 | BANF1      | -1.1 | 0.0005061 | 0.0033915 | 155.639 | 7.227 | 150.667 | 163.929 | 178.610 | 2.361 | 175.933 | 180.396 |
| 610 | ENSG00000172530 | BANP       | -1.2 | 0.0149099 | 0.0502131 | 3.804   | 0.425 | 3.362   | 4.210   | 4.596   | 0.350 | 4.220   | 4.912   |
| 611 | ENSG00000163930 | BAP1       | -1.1 | 0.0003185 | 0.0023186 | 36.036  | 1.337 | 35.013  | 37.548  | 42.086  | 1.670 | 40.184  | 43.315  |
| 612 | ENSG00000138376 | BARD1      | 1.1  | 0.0034869 | 0.0158915 | 17.782  | 0.110 | 17.655  | 17.853  | 16.176  | 0.158 | 16.024  | 16.339  |
| 613 | ENSG00000176788 | BASP1      | -1.2 | 1.255E-07 | 3.323E-06 | 131.830 | 3.472 | 128.018 | 134.812 | 162.786 | 4.666 | 157.402 | 165.667 |
| 614 | ENSG00000123685 | BATF3      | 1.4  | 0.0994541 | 0.2124859 | 0.946   | 0.246 | 0.707   | 1.198   | 0.669   | 0.118 | 0.572   | 0.800   |
| 615 | ENSG00000087088 | BAX        | 1.2  | 1.875E-05 | 0.0002249 | 152.352 | 4.488 | 148.825 | 157.404 | 135.063 | 5.867 | 129.726 | 141.346 |
| 616 | ENSG00000009954 | BAZ1B      | -1.1 | 0.003506  | 0.0159529 | 59.492  | 1.437 | 58.153  | 61.011  | 66.148  | 2.174 | 63.910  | 68.253  |
| 617 | ENSG00000076108 | BAZ2A      | -1.1 | 0.0749413 | 0.1723995 | 51.518  | 2.020 | 49.454  | 53.491  | 55.332  | 1.674 | 53.966  | 57.199  |
| 618 | ENSG00000123636 | BAZ2B      | -1.2 | 1.565E-05 | 0.0001929 | 5.620   | 0.117 | 5.530   | 5.752   | 7.003   | 0.241 | 6.734   | 7.197   |
| 619 | ENSG00000105327 | BBC3       | -1.1 | 0.0211214 | 0.0658845 | 35.239  | 3.396 | 32.939  | 39.140  | 40.468  | 3.085 | 37.750  | 43.821  |
| 620 | ENSG00000119636 | BBOF1      | 1.5  | 0.0460198 | 0.1191641 | 0.908   | 0.130 | 0.767   | 1.023   | 0.624   | 0.193 | 0.403   | 0.759   |
| 621 | ENSG00000179941 | BBS10      | -1.1 | 0.0450881 | 0.1173553 | 32.850  | 2.499 | 30.575  | 35.525  | 36.710  | 2.097 | 34.300  | 38.112  |
| 623 | ENSG00000125124 | BBS2       | 1.1  | 0.1049675 | 0.2208269 | 12.356  | 0.705 | 11.653  | 13.063  | 11.815  | 0.224 | 11.568  | 12.006  |
| 624 | ENSG00000140463 | BBS4       | 1.1  | 0.0460215 | 0.1191641 | 22.075  | 0.268 | 21.778  | 22.299  | 20.709  | 0.388 | 20.280  | 21.037  |
| 625 | ENSG00000114439 | BBX        | 1.1  | 0.0535815 | 0.1339181 | 29.572  | 0.859 | 29.039  | 30.563  | 28.552  | 0.967 | 27.956  | 29.668  |
| 626 | ENSG00000187244 | BCAM       | -1.1 | 0.00376   | 0.0168728 | 39.257  | 2.778 | 36.059  | 41.072  | 45.052  | 2.623 | 43.276  | 48.065  |
| 627 | ENSG00000132692 | BCAN       | 1.5  | 9.897E-05 | 0.0008965 | 4.426   | 0.295 | 4.105   | 4.683   | 3.103   | 0.312 | 2.803   | 3.425   |
| 628 | ENSG00000075790 | BCAP29     | 1.2  | 0.0013742 | 0.0075458 | 8.541   | 0.553 | 7.973   | 9.077   | 7.241   | 0.134 | 7.086   | 7.332   |
| 629 | ENSG00000050820 | BCAR1      | 1.5  | 7.895E-09 | 3.028E-07 | 36.623  | 1.641 | 35.656  | 38.518  | 24.828  | 2.951 | 21.918  | 27.819  |
| 630 | ENSG00000137936 | BCAR3      | -1.1 | 0.0375763 | 0.1019781 | 5.826   | 0.255 | 5.555   | 6.062   | 6.844   | 0.315 | 6.499   | 7.116   |
| 631 | ENSG00000141376 | BCAS3      | 1.3  | 0.0002345 | 0.0018158 | 5.039   | 0.410 | 4.758   | 5.510   | 4.116   | 0.251 | 3.954   | 4.405   |
| 632 | ENSG00000060982 | BCAT1      | 1.4  | 3.62E-14  | 5.68E-12  | 133.934 | 4.129 | 129.298 | 137.212 | 101.404 | 0.625 | 100.684 | 101.809 |
| 633 | ENSG00000105552 | BCAT2      | -1.2 | 0.0062848 | 0.0252722 | 13.263  | 1.209 | 11.998  | 14.407  | 15.662  | 0.184 | 15.527  | 15.871  |
| 634 | ENSG00000107949 | BCCIP      | -1.1 | 0.0001082 | 0.000962  | 72.145  | 1.670 | 70.452  | 73.790  | 84.214  | 3.770 | 79.868  | 86.597  |
| 635 | ENSG00000114200 | BCHE       | 1.3  | 0.0298412 | 0.0859147 | 2.851   | 0.282 | 2.610   | 3.162   | 2.173   | 0.630 | 1.516   | 2.771   |
| 636 | ENSG00000248098 | BCKDHA     | -1.2 | 0.1226065 | 0.246833  | 2.772   | 0.682 | 1.986   | 3.206   | 3.477   | 0.332 | 3.126   | 3.784   |
| 637 | ENSG00000083123 | BCKDHB     | 1.1  | 0.1040946 | 0.2195201 | 27.070  | 0.192 | 26.947  | 27.291  | 25.801  | 1.159 | 25.087  | 27.138  |
| 638 | ENSG00000171791 | BCL2       | 1.3  | 0.0011248 | 0.0064671 | 2.249   | 0.241 | 2.039   | 2.512   | 1.771   | 0.043 | 1.729   | 1.816   |
| 639 | ENSG00000153094 | BCL2L11    | -1.4 | 3.915E-09 | 1.651E-07 | 9.841   | 0.217 | 9.602   | 10.025  | 14.487  | 0.536 | 14.065  | 15.090  |
| 640 | ENSG00000069399 | BCL3       | -1.4 | 0.017697  | 0.0572511 | 1.265   | 0.180 | 1.139   | 1.471   | 1.836   | 0.104 | 1.724   | 1.930   |



|     | A               | B           | C    | D         | E         | F       | G     | H       | I       | J       | K      | L       | M       |
|-----|-----------------|-------------|------|-----------|-----------|---------|-------|---------|---------|---------|--------|---------|---------|
| 641 | ENSG00000113916 | BCL6        | -1.2 | 0.0131894 | 0.0455623 | 7.234   | 0.183 | 7.061   | 7.427   | 8.618   | 0.527  | 8.081   | 9.134   |
| 642 | ENSG00000161940 | BCL6B       | -1.4 | 0.0001779 | 0.0014533 | 3.150   | 0.143 | 3.039   | 3.311   | 4.615   | 0.617  | 4.083   | 5.291   |
| 643 | ENSG00000110987 | BCL7A       | 1.1  | 0.035195  | 0.0973113 | 8.441   | 0.810 | 7.899   | 9.373   | 7.651   | 0.476  | 7.310   | 8.195   |
| 644 | ENSG00000116128 | BCL9        | 1.1  | 0.0465095 | 0.1201652 | 42.375  | 2.894 | 39.257  | 44.974  | 40.494  | 1.383  | 39.278  | 41.999  |
| 645 | ENSG00000029363 | BCLAF1      | 1.1  | 0.0234308 | 0.0714021 | 95.420  | 1.970 | 93.183  | 96.895  | 91.422  | 0.321  | 91.052  | 91.619  |
| 646 | ENSG00000248966 | BCLAF1P1    | 1.3  | 0.0756847 | 0.1736611 | 2.179   | 0.454 | 1.769   | 2.666   | 1.701   | 0.127  | 1.618   | 1.847   |
| 647 | ENSG00000183337 | BCOR        | -1.1 | 0.0052355 | 0.0218637 | 20.649  | 0.486 | 20.115  | 21.064  | 23.339  | 1.218  | 21.955  | 24.247  |
| 648 | ENSG00000085185 | BCORL1      | -1.3 | 0.0008521 | 0.0051344 | 2.581   | 0.102 | 2.511   | 2.698   | 3.441   | 0.130  | 3.321   | 3.579   |
| 649 | ENSG00000161267 | BDH1        | 1.2  | 0.0036692 | 0.0165664 | 3.592   | 0.081 | 3.499   | 3.645   | 2.934   | 0.218  | 2.797   | 3.186   |
| 650 | ENSG00000183092 | BEGAIN      | 1.3  | 0.0557052 | 0.1379226 | 1.279   | 0.089 | 1.218   | 1.381   | 1.031   | 0.047  | 0.993   | 1.084   |
| 651 | ENSG00000188848 | BEND4       | -1.3 | 4.892E-08 | 1.467E-06 | 25.634  | 0.879 | 24.919  | 26.615  | 33.006  | 2.417  | 31.503  | 35.794  |
| 652 | ENSG00000151917 | BEND6       | 1.3  | 0.0101333 | 0.0368646 | 2.768   | 0.662 | 2.272   | 3.519   | 2.120   | 0.104  | 2.015   | 2.223   |
| 654 | ENSG00000165626 | BEND7       | 1.1  | 0.0654722 | 0.1556334 | 3.150   | 0.239 | 2.873   | 3.294   | 2.851   | 0.168  | 2.674   | 3.010   |
| 655 | ENSG00000167995 | BEST1       | 1.8  | 0.0060082 | 0.0243978 | 0.375   | 0.051 | 0.317   | 0.414   | 0.216   | 0.028  | 0.191   | 0.246   |
| 657 | ENSG00000039987 | BEST2       | -2.1 | 5.2E-05   | 0.0005283 | 1.045   | 0.115 | 0.949   | 1.173   | 2.236   | 0.303  | 2.054   | 2.586   |
| 658 | ENSG00000142959 | BEST4       | -1.2 | 0.101971  | 0.216174  | 2.485   | 0.054 | 2.452   | 2.547   | 3.167   | 0.202  | 2.959   | 3.362   |
| 659 | ENSG00000105829 | BET1        | -1.1 | 0.1186632 | 0.2408437 | 19.760  | 1.001 | 18.994  | 20.892  | 21.571  | 1.075  | 20.835  | 22.805  |
| 660 | ENSG00000177951 | BET1L       | -1.2 | 1.263E-05 | 0.0001632 | 20.621  | 1.499 | 19.665  | 22.348  | 26.223  | 0.966  | 25.145  | 27.011  |
| 661 | ENSG00000133169 | BEX1        | 1.1  | 0.0189154 | 0.0603503 | 149.287 | 4.545 | 145.260 | 154.215 | 139.620 | 5.037  | 134.043 | 143.838 |
| 662 | ENSG00000133134 | BEX2        | 1.3  | 2.011E-06 | 3.408E-05 | 96.910  | 3.332 | 93.091  | 99.225  | 78.828  | 3.869  | 74.675  | 82.332  |
| 663 | ENSG00000166681 | BEX3        | 1    | 0.1037161 | 0.219014  | 526.332 | 0.718 | 525.506 | 526.802 | 514.719 | 12.870 | 506.593 | 529.557 |
| 664 | ENSG00000184515 | BEX5        | 1.4  | 1.041E-05 | 0.0001377 | 29.675  | 1.551 | 28.031  | 31.112  | 21.407  | 1.217  | 20.096  | 22.499  |
| 665 | ENSG00000103429 | BFAR        | -1.1 | 0.1032967 | 0.2182457 | 52.201  | 1.114 | 51.161  | 53.376  | 56.125  | 0.749  | 55.260  | 56.575  |
| 666 | ENSG00000182492 | BGN         | -1.3 | 0.0401483 | 0.1073055 | 3.787   | 1.003 | 3.011   | 4.920   | 5.038   | 0.946  | 4.368   | 6.121   |
| 667 | ENSG00000198908 | BHLHB9      | 1.1  | 0.0438091 | 0.1147149 | 15.712  | 0.933 | 14.753  | 16.616  | 14.610  | 0.976  | 13.640  | 15.592  |
| 669 | ENSG00000134107 | BHLHE40     | 6.1  | 6.74E-25  | 1.90E-21  | 19.477  | 2.199 | 17.628  | 21.909  | 3.252   | 0.485  | 2.833   | 3.784   |
| 670 | ENSG00000235831 | BHLHE40-AS1 | 2.4  | 0.0003298 | 0.0023806 | 1.453   | 0.323 | 1.152   | 1.794   | 0.635   | 0.356  | 0.403   | 1.044   |
| 671 | ENSG00000123095 | BHLHE41     | 1.5  | 0.001543  | 0.00829   | 3.078   | 0.672 | 2.393   | 3.736   | 2.088   | 0.620  | 1.455   | 2.694   |
| 672 | ENSG00000122870 | BICC1       | 1.8  | 0.0200348 | 0.0631355 | 0.383   | 0.125 | 0.270   | 0.517   | 0.217   | 0.041  | 0.178   | 0.260   |
| 673 | ENSG00000151746 | BICD1       | 1.1  | 0.0035748 | 0.0162308 | 12.304  | 0.774 | 11.775  | 13.192  | 11.170  | 0.279  | 10.934  | 11.478  |
| 674 | ENSG00000185963 | BICD2       | -1.2 | 5.313E-05 | 0.0005371 | 20.397  | 0.832 | 19.447  | 20.997  | 24.490  | 0.604  | 24.097  | 25.186  |
| 676 | ENSG00000135127 | BICDL1      | 1.2  | 0.0001859 | 0.0015052 | 11.730  | 0.521 | 11.396  | 12.331  | 9.746   | 0.643  | 9.005   | 10.164  |
| 678 | ENSG00000063169 | BICRA       | -1.2 | 0.0110691 | 0.0395379 | 4.313   | 0.341 | 3.949   | 4.625   | 5.203   | 0.529  | 4.882   | 5.813   |
| 679 | ENSG00000112624 | BICRAL      | -1.2 | 0.0031868 | 0.0147931 | 6.992   | 0.348 | 6.645   | 7.341   | 8.420   | 0.315  | 8.057   | 8.609   |
| 680 | ENSG00000136717 | BIN1        | 1.1  | 0.0078361 | 0.0301371 | 20.029  | 0.370 | 19.739  | 20.445  | 18.456  | 0.481  | 18.020  | 18.971  |
| 681 | ENSG00000147439 | BIN3        | 1.2  | 0.0013148 | 0.0072868 | 9.406   | 0.879 | 8.536   | 10.294  | 7.873   | 0.262  | 7.643   | 8.159   |
| 682 | ENSG00000110330 | BIRC2       | 1.1  | 0.0121799 | 0.0428004 | 36.229  | 0.747 | 35.468  | 36.960  | 33.522  | 2.012  | 31.646  | 35.646  |
| 683 | ENSG00000089685 | BIRC5       | -1.2 | 3.438E-08 | 1.071E-06 | 94.233  | 1.866 | 93.062  | 96.385  | 117.005 | 4.306  | 113.696 | 121.873 |
| 684 | ENSG00000134897 | BIVM        | 1.5  | 1.405E-05 | 0.0001776 | 4.205   | 0.217 | 4.028   | 4.447   | 2.927   | 0.028  | 2.903   | 2.958   |
| 685 | ENSG00000281406 | BLACAT1     | 1.2  | 0.0027843 | 0.0132875 | 11.842  | 1.118 | 10.553  | 12.534  | 9.860   | 0.569  | 9.285   | 10.423  |
| 686 | ENSG00000108578 | BLMH        | 1.1  | 0.0003343 | 0.002407  | 51.789  | 0.919 | 51.202  | 52.849  | 47.072  | 0.881  | 46.320  | 48.041  |
| 687 | ENSG00000135441 | BLOC1S1     | 1.3  | 0.0017596 | 0.0092137 | 21.077  | 1.452 | 20.153  | 22.750  | 17.045  | 1.094  | 16.225  | 18.287  |

|     | A               | B             | C    | D         | E         | F       | G     | H       | I       | J       | K     | L       | M       |
|-----|-----------------|---------------|------|-----------|-----------|---------|-------|---------|---------|---------|-------|---------|---------|
| 689 | ENSG00000196072 | BLOC1S2       | 1.2  | 0.0002432 | 0.0018678 | 65.735  | 3.134 | 63.252  | 69.257  | 57.833  | 2.565 | 55.322  | 60.449  |
| 690 | ENSG00000104164 | BLOC1S6       | 1.1  | 0.087828  | 0.1944683 | 25.282  | 0.637 | 24.704  | 25.964  | 24.226  | 1.028 | 23.109  | 25.132  |
| 691 | ENSG00000106605 | BLVRA         | 1.1  | 0.0456807 | 0.1185692 | 47.310  | 3.297 | 44.756  | 51.031  | 44.060  | 0.648 | 43.324  | 44.540  |
| 692 | ENSG00000090013 | BLVRB         | 1.3  | 6.013E-06 | 8.655E-05 | 55.664  | 1.437 | 54.216  | 57.089  | 45.128  | 0.622 | 44.584  | 45.806  |
| 693 | ENSG00000104081 | BMF           | -1.4 | 1.171E-08 | 4.277E-07 | 14.090  | 1.277 | 12.848  | 15.399  | 19.976  | 0.969 | 19.245  | 21.075  |
| 694 | ENSG00000168487 | BMP1          | -1.3 | 0.0737699 | 0.1704359 | 1.229   | 0.092 | 1.127   | 1.304   | 1.580   | 0.168 | 1.393   | 1.717   |
| 695 | ENSG00000125845 | BMP2          | -1.6 | 0.0111718 | 0.0414442 | 0.850   | 0.231 | 0.662   | 1.108   | 1.387   | 0.082 | 1.303   | 1.466   |
| 696 | ENSG00000138756 | BMP2K         | 1.1  | 0.0086158 | 0.0323175 | 13.313  | 0.689 | 12.743  | 14.078  | 12.244  | 0.668 | 11.517  | 12.830  |
| 697 | ENSG00000125378 | BMP4          | -1.5 | 0.0029383 | 0.0138311 | 2.033   | 0.391 | 1.595   | 2.349   | 3.057   | 0.268 | 2.842   | 3.357   |
| 698 | ENSG00000101144 | BMP7          | -1.2 | 0.0140018 | 0.0477877 | 8.055   | 0.227 | 7.809   | 8.257   | 9.532   | 0.542 | 8.943   | 10.011  |
| 699 | ENSG00000116985 | BMP8B         | 1.4  | 0.0702214 | 0.1642449 | 0.880   | 0.129 | 0.742   | 0.996   | 0.638   | 0.209 | 0.483   | 0.876   |
| 700 | ENSG00000232460 | BMPR1APS<br>2 | 1.1  | 0.0893822 | 0.197044  | 38.344  | 1.296 | 36.952  | 39.515  | 35.304  | 1.973 | 33.351  | 37.297  |
| 701 | ENSG00000138696 | BMPR1B        | 2    | 0.0018378 | 0.0095319 | 0.579   | 0.110 | 0.491   | 0.702   | 0.298   | 0.131 | 0.221   | 0.449   |
| 702 | ENSG00000165733 | BMS1          | -1   | 0.0859886 | 0.1915855 | 47.486  | 0.887 | 46.900  | 48.506  | 50.840  | 0.083 | 50.751  | 50.916  |
| 703 | ENSG00000173068 | BNC2          | -1.2 | 6.669E-05 | 0.0006495 | 6.203   | 0.750 | 5.406   | 6.894   | 7.824   | 0.414 | 7.502   | 8.290   |
| 704 | ENSG00000113734 | BNIP1         | -1.3 | 0.000685  | 0.0043022 | 9.107   | 0.498 | 8.537   | 9.464   | 11.943  | 0.567 | 11.329  | 12.448  |
| 705 | ENSG00000176171 | BNIP3         | -1.7 | 9.411E-06 | 0.0001269 | 14.417  | 1.084 | 13.525  | 15.624  | 25.536  | 4.604 | 22.330  | 30.812  |
| 706 | ENSG00000104765 | BNIP3L        | -1.2 | 6.152E-08 | 1.773E-06 | 53.326  | 3.445 | 50.880  | 57.266  | 67.586  | 2.605 | 64.600  | 69.397  |
| 707 | ENSG00000197358 | BNIP3P1       | -2.1 | 5.204E-07 | 1.118E-05 | 8.376   | 0.987 | 7.238   | 8.995   | 17.771  | 4.802 | 14.406  | 23.270  |
| 708 | ENSG00000144857 | BOC           | -1.3 | 0.0170415 | 0.0556844 | 1.917   | 0.222 | 1.672   | 2.106   | 2.444   | 0.347 | 2.052   | 2.710   |
| 709 | ENSG00000176720 | BOK           | 1.1  | 0.0489421 | 0.1250391 | 32.129  | 1.283 | 30.749  | 33.285  | 30.048  | 1.466 | 29.018  | 31.727  |
| 710 | ENSG00000261236 | BOP1          | -1.3 | 5.663E-09 | 2.291E-07 | 33.212  | 2.217 | 31.713  | 35.759  | 45.810  | 3.475 | 42.335  | 49.285  |
| 711 | ENSG00000137274 | BPHL          | 1.2  | 0.0001374 | 0.0011683 | 15.965  | 0.343 | 15.735  | 16.359  | 13.291  | 1.084 | 12.122  | 14.263  |
| 712 | ENSG00000171634 | BPTF          | -1.1 | 0.0001003 | 0.0009065 | 46.570  | 1.228 | 45.253  | 47.684  | 53.398  | 1.550 | 51.805  | 54.902  |
| 713 | ENSG00000157764 | BRAF          | -1.1 | 0.1019887 | 0.2161839 | 10.359  | 0.481 | 9.907   | 10.865  | 11.384  | 0.390 | 11.139  | 11.833  |
| 714 | ENSG00000106009 | BRAT1         | -1.2 | 6.877E-05 | 0.0006658 | 18.390  | 0.648 | 17.796  | 19.081  | 22.449  | 1.875 | 20.562  | 24.311  |
| 715 | ENSG00000012048 | BRCA1         | 1.1  | 0.0362965 | 0.0995433 | 18.167  | 0.339 | 17.784  | 18.430  | 17.252  | 0.339 | 16.989  | 17.635  |
| 716 | ENSG00000139618 | BRCA2         | 1.3  | 4.544E-06 | 6.832E-05 | 9.590   | 0.245 | 9.420   | 9.871   | 7.684   | 0.754 | 7.220   | 8.554   |
| 717 | ENSG00000185515 | BRCC3         | 1.1  | 0.0045878 | 0.0197791 | 24.065  | 0.685 | 23.574  | 24.847  | 21.490  | 0.857 | 20.668  | 22.377  |
| 718 | ENSG00000204256 | BRD2          | -1.1 | 0.0002253 | 0.0017556 | 63.123  | 2.027 | 60.974  | 65.000  | 71.765  | 0.851 | 70.922  | 72.623  |
| 719 | ENSG00000169925 | BRD3          | -1.2 | 9.505E-07 | 1.829E-05 | 31.721  | 1.184 | 30.491  | 32.853  | 39.065  | 1.392 | 37.838  | 40.578  |
| 720 | ENSG00000166164 | BRD7          | 1.1  | 0.0068372 | 0.0269666 | 36.863  | 0.241 | 36.591  | 37.050  | 34.689  | 1.446 | 33.455  | 36.280  |
| 721 | ENSG00000112983 | BRD8          | -1.2 | 2.762E-06 | 4.474E-05 | 24.648  | 1.155 | 23.365  | 25.606  | 30.475  | 0.667 | 30.020  | 31.241  |
| 722 | ENSG00000028310 | BRD9          | -1.1 | 0.0583058 | 0.1425654 | 12.560  | 0.444 | 12.205  | 13.058  | 13.785  | 0.257 | 13.489  | 13.956  |
| 723 | ENSG00000185024 | BRF1          | -1.2 | 0.0246491 | 0.0741351 | 2.441   | 0.066 | 2.366   | 2.489   | 2.889   | 0.204 | 2.712   | 3.112   |
| 724 | ENSG00000164713 | BRI3          | 1.2  | 0.0035263 | 0.0160324 | 15.694  | 0.361 | 15.337  | 16.060  | 13.767  | 1.302 | 12.803  | 15.247  |
| 725 | ENSG00000078725 | BRINP1        | -1.3 | 0.0001094 | 0.0009706 | 8.095   | 1.281 | 6.659   | 9.118   | 11.146  | 0.893 | 10.579  | 12.175  |
| 726 | ENSG00000136492 | BRIP1         | 1.2  | 0.0004258 | 0.0029356 | 16.941  | 0.295 | 16.612  | 17.183  | 14.949  | 0.349 | 14.619  | 15.314  |
| 727 | ENSG00000254999 | BRK1          | -1.1 | 0.0975156 | 0.2094591 | 254.906 | 9.022 | 248.509 | 265.225 | 274.071 | 6.491 | 267.641 | 280.622 |
| 728 | ENSG00000174744 | BRMS1         | -1.1 | 0.0398694 | 0.1066779 | 24.371  | 0.362 | 24.001  | 24.725  | 27.557  | 1.541 | 25.880  | 28.910  |
| 729 | ENSG00000156983 | BRPF1         | -1.1 | 0.0388628 | 0.1045303 | 8.132   | 0.366 | 7.710   | 8.351   | 9.340   | 0.480 | 8.928   | 9.867   |

|     | A               | B         | C    | D         | E         | F       | G     | H       | I       | J       | K      | L       | M       |
|-----|-----------------|-----------|------|-----------|-----------|---------|-------|---------|---------|---------|--------|---------|---------|
| 730 | ENSG00000160469 | BRSK1     | -1.5 | 8.2E-09   | 3.131E-07 | 11.938  | 1.015 | 10.861  | 12.877  | 18.161  | 0.957  | 17.062  | 18.813  |
| 732 | ENSG00000174672 | BRSK2     | -1.1 | 0.0664593 | 0.1575219 | 4.612   | 0.494 | 4.058   | 5.005   | 5.300   | 0.363  | 4.882   | 5.536   |
| 733 | ENSG00000160058 | BSDC1     | 1.1  | 0.0583584 | 0.1426117 | 24.023  | 0.450 | 23.638  | 24.518  | 22.874  | 0.973  | 21.822  | 23.743  |
| 734 | ENSG00000164061 | BSN       | 1.1  | 0.0721623 | 0.1676945 | 1.373   | 0.075 | 1.292   | 1.442   | 1.221   | 0.025  | 1.193   | 1.243   |
| 735 | ENSG00000162399 | BSND      | 1.3  | 0.1163398 | 0.2376396 | 1.423   | 0.498 | 0.850   | 1.759   | 1.080   | 0.368  | 0.769   | 1.487   |
| 736 | ENSG00000130303 | BST2      | -1.8 | 1.27E-15  | 2.73E-13  | 88.251  | 6.795 | 80.881  | 94.268  | 158.341 | 9.786  | 151.824 | 169.594 |
| 737 | ENSG00000064726 | BTBD1     | 1.1  | 0.0008595 | 0.0051731 | 62.148  | 2.385 | 60.634  | 64.897  | 56.242  | 2.025  | 54.461  | 58.444  |
| 738 | ENSG00000148925 | BTBD10    | 1.2  | 0.0011223 | 0.0064609 | 29.192  | 1.101 | 28.195  | 30.374  | 25.858  | 0.705  | 25.060  | 26.394  |
| 739 | ENSG00000204347 | BTBD17    | -1.4 | 0.1230867 | 0.2475935 | 1.314   | 0.361 | 0.900   | 1.568   | 1.822   | 0.386  | 1.473   | 2.237   |
| 740 | ENSG00000133243 | BTBD2     | -1.1 | 0.0181701 | 0.0585355 | 44.891  | 1.121 | 43.667  | 45.869  | 49.785  | 4.211  | 46.376  | 54.492  |
| 741 | ENSG00000184887 | BTBD6     | 1.4  | 0.0006004 | 0.0038845 | 9.891   | 1.237 | 8.888   | 11.274  | 7.439   | 0.884  | 6.419   | 7.977   |
| 742 | ENSG00000183826 | BTBD9     | 1.2  | 0.092432  | 0.2020031 | 1.465   | 0.056 | 1.406   | 1.518   | 1.254   | 0.283  | 1.067   | 1.580   |
| 743 | ENSG00000169814 | BTD       | -1.2 | 0.0032123 | 0.0148808 | 10.359  | 0.507 | 9.846   | 10.860  | 12.680  | 0.501  | 12.118  | 13.081  |
| 744 | ENSG00000134717 | BTF3L4    | 1.1  | 0.012259  | 0.0429622 | 59.859  | 1.389 | 58.952  | 61.459  | 56.660  | 1.876  | 54.561  | 58.175  |
| 745 | ENSG00000231120 | BTF3P10   | -1.1 | 0.0994331 | 0.2124715 | 40.941  | 3.072 | 38.702  | 44.443  | 48.005  | 6.113  | 41.830  | 54.055  |
| 746 | ENSG00000133639 | BTG1      | -1.1 | 0.0324098 | 0.091648  | 16.844  | 0.323 | 16.649  | 17.216  | 18.870  | 0.715  | 18.050  | 19.365  |
| 747 | ENSG00000159388 | BTG2      | -1.1 | 0.0493598 | 0.1258202 | 40.994  | 1.774 | 38.958  | 42.200  | 45.965  | 5.257  | 40.895  | 51.392  |
| 748 | ENSG00000112763 | BTN2A1    | 1.2  | 0.0020977 | 0.0105369 | 11.104  | 0.817 | 10.397  | 11.999  | 9.347   | 0.422  | 8.968   | 9.801   |
| 749 | ENSG00000124508 | BTN2A2    | 1.1  | 0.0949857 | 0.2059876 | 10.716  | 0.607 | 10.015  | 11.073  | 10.077  | 0.053  | 10.017  | 10.108  |
| 750 | ENSG00000111801 | BTN3A3    | -1.2 | 0.0461108 | 0.1193194 | 3.060   | 0.165 | 2.931   | 3.246   | 3.720   | 0.367  | 3.471   | 4.142   |
| 751 | ENSG00000169679 | BUB1      | -1.7 | 1.64E-20  | 1.21E-17  | 114.255 | 5.331 | 110.479 | 120.353 | 198.885 | 12.129 | 185.139 | 208.083 |
| 752 | ENSG00000156970 | BUB1B     | -1.4 | 7.22E-15  | 1.37E-12  | 146.944 | 3.199 | 144.741 | 150.613 | 211.276 | 12.296 | 201.775 | 225.163 |
| 753 | ENSG00000154473 | BUB3      | -1.3 | 1.754E-09 | 8.128E-08 | 65.233  | 2.667 | 63.543  | 68.308  | 83.413  | 5.068  | 77.687  | 87.324  |
| 754 | ENSG00000071462 | BUD23     | -1.1 | 0.0580421 | 0.1421674 | 17.981  | 0.593 | 17.415  | 18.598  | 19.646  | 0.672  | 19.021  | 20.357  |
| 755 | ENSG00000112276 | BVES      | 1.3  | 0.0071854 | 0.028105  | 4.864   | 0.370 | 4.525   | 5.259   | 3.954   | 0.918  | 3.021   | 4.856   |
| 756 | ENSG00000082153 | BZW1      | -1.1 | 0.0010277 | 0.0060059 | 62.353  | 2.623 | 59.572  | 64.783  | 69.977  | 0.732  | 69.473  | 70.816  |
| 757 | ENSG00000198406 | BZW1P2    | -1.1 | 0.0024072 | 0.0117837 | 281.754 | 6.524 | 274.282 | 286.322 | 316.808 | 2.315  | 314.176 | 318.527 |
| 758 | ENSG00000165507 | C10orf10  | -2   | 0.0003013 | 0.0022173 | 0.877   | 0.300 | 0.550   | 1.140   | 1.801   | 0.190  | 1.616   | 1.995   |
| 759 | ENSG00000165863 | C10orf82  | 1.3  | 0.0002069 | 0.0016349 | 11.838  | 0.722 | 11.030  | 12.421  | 9.124   | 0.331  | 8.760   | 9.406   |
| 760 | ENSG00000119965 | C10orf88  | -1.2 | 0.0149519 | 0.0503145 | 10.653  | 0.714 | 9.871   | 11.269  | 12.643  | 0.219  | 12.413  | 12.848  |
| 761 | ENSG00000149179 | C11orf49  | 1.2  | 0.001305  | 0.0072498 | 7.960   | 0.330 | 7.677   | 8.322   | 6.611   | 1.048  | 5.585   | 7.680   |
| 762 | ENSG00000182919 | C11orf54  | -1.1 | 0.0653379 | 0.1553578 | 9.812   | 0.376 | 9.387   | 10.104  | 11.028  | 0.694  | 10.231  | 11.500  |
| 763 | ENSG00000180425 | C11orf71  | -1.2 | 0.0140983 | 0.0480607 | 13.293  | 0.938 | 12.399  | 14.270  | 16.250  | 2.319  | 14.554  | 18.893  |
| 764 | ENSG00000173715 | C11orf80  | 1.3  | 3.444E-05 | 0.0003744 | 12.549  | 0.925 | 12.000  | 13.616  | 9.654   | 0.830  | 8.745   | 10.372  |
| 765 | ENSG00000139637 | C12orf10  | 1.1  | 0.1229537 | 0.2474435 | 34.459  | 0.500 | 33.976  | 34.975  | 32.883  | 0.469  | 32.352  | 33.239  |
| 766 | ENSG00000047621 | C12orf4   | 1.2  | 0.0266498 | 0.078691  | 6.797   | 0.577 | 6.157   | 7.279   | 5.961   | 0.369  | 5.541   | 6.236   |
| 767 | ENSG00000111412 | C12orf49  | 1.1  | 0.0007091 | 0.0044139 | 26.108  | 0.898 | 25.072  | 26.652  | 23.792  | 0.439  | 23.320  | 24.189  |
| 768 | ENSG00000130921 | C12orf65  | 1.2  | 0.0265062 | 0.0783286 | 4.512   | 0.172 | 4.392   | 4.709   | 3.941   | 0.416  | 3.507   | 4.337   |
| 770 | ENSG00000235162 | C12orf75  | 1.2  | 0.0025257 | 0.0122784 | 24.439  | 1.200 | 23.206  | 25.603  | 21.303  | 0.825  | 20.443  | 22.087  |
| 771 | ENSG00000133935 | C14orf1   | 1.2  | 0.0001287 | 0.001111  | 64.284  | 0.734 | 63.798  | 65.128  | 57.144  | 1.890  | 56.033  | 59.326  |
| 772 | ENSG00000179933 | C14orf119 | -1.1 | 0.0290426 | 0.0841553 | 46.870  | 1.494 | 45.149  | 47.836  | 51.622  | 1.431  | 49.978  | 52.587  |
| 773 | ENSG00000133943 | C14orf159 | 1.1  | 0.0530301 | 0.1329328 | 9.448   | 0.282 | 9.253   | 9.771   | 8.755   | 0.679  | 8.349   | 9.539   |
| 774 | ENSG00000156411 | C14orf2   | -1.1 | 0.0675043 | 0.1593891 | 47.832  | 2.576 | 44.949  | 49.909  | 52.287  | 1.967  | 50.194  | 54.098  |

|     | A               | B            | C    | D         | E         | F       | G     | H       | I       | J       | K     | L       | M       |
|-----|-----------------|--------------|------|-----------|-----------|---------|-------|---------|---------|---------|-------|---------|---------|
| 775 | ENSG00000179476 | C14orf28     | 1.2  | 0.0049493 | 0.0209817 | 8.791   | 0.379 | 8.412   | 9.170   | 7.424   | 0.626 | 6.752   | 7.990   |
| 776 | ENSG00000139971 | C14orf37     | 1.1  | 0.0991313 | 0.2120409 | 11.324  | 0.951 | 10.305  | 12.186  | 10.708  | 0.273 | 10.420  | 10.962  |
| 777 | ENSG00000185347 | C14orf80     | 1.2  | 0.0192088 | 0.0610197 | 3.450   | 0.135 | 3.351   | 3.603   | 2.937   | 0.215 | 2.690   | 3.082   |
| 778 | ENSG00000167173 | C15orf39     | 1.1  | 0.0736213 | 0.1701731 | 6.932   | 0.134 | 6.808   | 7.075   | 6.390   | 0.436 | 6.001   | 6.862   |
| 779 | ENSG00000169609 | C15orf40     | -1.3 | 5.113E-06 | 7.568E-05 | 3.348   | 0.128 | 3.200   | 3.430   | 4.553   | 0.226 | 4.299   | 4.734   |
| 780 | ENSG00000186073 | C15orf41     | 1.2  | 0.0375683 | 0.1019781 | 5.081   | 0.139 | 4.920   | 5.162   | 4.437   | 0.986 | 3.483   | 5.451   |
| 781 | ENSG00000205363 | C15orf59     | -1.2 | 0.1009443 | 0.2144813 | 2.118   | 0.127 | 1.972   | 2.201   | 2.526   | 0.270 | 2.332   | 2.835   |
| 782 | ENSG00000260469 | C15orf59-AS1 | -1.7 | 1.216E-05 | 0.0001577 | 5.926   | 0.911 | 4.875   | 6.472   | 10.031  | 0.807 | 9.136   | 10.702  |
| 783 | ENSG00000166780 | C16orf45     | 1.1  | 0.0752713 | 0.1729008 | 10.147  | 0.424 | 9.775   | 10.609  | 9.091   | 1.621 | 7.240   | 10.263  |
| 784 | ENSG00000162062 | C16orf59     | -1.2 | 0.0029778 | 0.0140015 | 20.742  | 0.205 | 20.515  | 20.913  | 24.684  | 1.616 | 23.072  | 26.304  |
| 785 | ENSG00000103544 | C16orf62     | 1.1  | 0.0354585 | 0.097784  | 21.525  | 1.422 | 20.135  | 22.977  | 20.305  | 1.451 | 19.052  | 21.895  |
| 786 | ENSG00000125149 | C16orf70     | -1.1 | 0.0794925 | 0.1804156 | 8.535   | 0.296 | 8.297   | 8.867   | 9.529   | 0.358 | 9.149   | 9.859   |
| 787 | ENSG00000154102 | C16orf74     | 1.6  | 0.0008926 | 0.0053174 | 4.618   | 0.884 | 3.793   | 5.551   | 3.020   | 0.192 | 2.848   | 3.227   |
| 788 | ENSG00000159761 | C16orf86     | -1.4 | 0.0335343 | 0.0939171 | 2.374   | 0.557 | 1.734   | 2.748   | 3.377   | 0.436 | 2.985   | 3.847   |
| 789 | ENSG00000205832 | C16orf96     | -1.4 | 0.0096737 | 0.0354597 | 2.184   | 0.506 | 1.854   | 2.767   | 3.027   | 0.102 | 2.925   | 3.128   |
| 791 | ENSG00000125319 | C17orf53     | 1.1  | 0.1084705 | 0.226217  | 11.421  | 1.223 | 10.023  | 12.291  | 10.392  | 1.551 | 9.386   | 12.179  |
| 792 | ENSG00000178927 | C17orf62     | -1.2 | 0.0002823 | 0.0021107 | 9.998   | 0.510 | 9.597   | 10.572  | 12.204  | 0.805 | 11.350  | 12.950  |
| 793 | ENSG00000108666 | C17orf75     | 1.1  | 0.0059635 | 0.0242812 | 22.931  | 1.126 | 21.967  | 24.169  | 20.809  | 1.697 | 19.044  | 22.429  |
| 794 | ENSG00000141428 | C18orf21     | -1.1 | 0.0614605 | 0.1482432 | 21.024  | 0.785 | 20.366  | 21.894  | 24.059  | 2.800 | 21.235  | 26.835  |
| 795 | ENSG00000152242 | C18orf25     | -1.1 | 0.0011181 | 0.0064429 | 13.142  | 0.282 | 12.851  | 13.414  | 15.451  | 0.946 | 14.385  | 16.190  |
| 796 | ENSG00000177576 | C18orf32     | -1.2 | 0.0132761 | 0.0458055 | 2.537   | 0.110 | 2.414   | 2.625   | 3.206   | 0.223 | 2.966   | 3.406   |
| 797 | ENSG00000167747 | C19orf48     | -1.2 | 9.855E-07 | 1.879E-05 | 42.989  | 3.290 | 39.859  | 46.418  | 54.594  | 2.564 | 52.485  | 57.449  |
| 798 | ENSG00000104979 | C19orf53     | -1.2 | 0.0010331 | 0.0060337 | 84.131  | 5.746 | 80.288  | 90.736  | 99.008  | 0.491 | 98.449  | 99.365  |
| 799 | ENSG00000188493 | C19orf54     | -1.1 | 0.0165729 | 0.0545645 | 19.256  | 1.177 | 18.549  | 20.615  | 22.284  | 1.069 | 21.456  | 23.490  |
| 800 | ENSG00000130813 | C19orf66     | -1.1 | 0.0416305 | 0.1102045 | 8.846   | 0.740 | 7.997   | 9.353   | 10.237  | 0.744 | 9.496   | 10.983  |
| 801 | ENSG00000183397 | C19orf71     | 1.5  | 0.089287  | 0.1968855 | 6.231   | 1.461 | 4.819   | 7.737   | 4.247   | 1.167 | 3.249   | 5.530   |
| 802 | ENSG00000231245 | C1DP1        | -1.2 | 0.0577016 | 0.1415177 | 56.044  | 9.965 | 48.735  | 67.395  | 66.440  | 1.854 | 64.583  | 68.291  |
| 804 | ENSG00000106392 | C1GALT1      | -1.1 | 0.0455822 | 0.1183682 | 58.666  | 2.049 | 56.311  | 60.042  | 63.882  | 1.963 | 61.742  | 65.600  |
| 805 | ENSG00000163362 | C1orf106     | -1.3 | 2.297E-05 | 0.0002677 | 11.301  | 0.114 | 11.197  | 11.422  | 14.621  | 1.684 | 13.334  | 16.527  |
| 806 | ENSG00000116922 | C1orf109     | -1.1 | 0.0273878 | 0.0804007 | 16.134  | 0.331 | 15.927  | 16.516  | 18.329  | 1.406 | 16.755  | 19.459  |
| 807 | ENSG00000162817 | C1orf115     | 1.1  | 0.0642676 | 0.1534818 | 16.622  | 0.197 | 16.395  | 16.752  | 15.353  | 1.075 | 14.327  | 16.472  |
| 808 | ENSG00000182795 | C1orf116     | 1.4  | 0.0006928 | 0.0043364 | 3.203   | 0.364 | 2.979   | 3.623   | 2.337   | 0.419 | 1.972   | 2.794   |
| 809 | ENSG00000131591 | C1orf159     | -1.3 | 0.0004435 | 0.0030278 | 3.015   | 0.046 | 2.968   | 3.059   | 4.037   | 0.186 | 3.854   | 4.225   |
| 810 | ENSG00000119280 | C1orf198     | 1.1  | 0.0830041 | 0.186682  | 23.831  | 0.695 | 23.144  | 24.533  | 22.819  | 0.384 | 22.377  | 23.061  |
| 811 | ENSG00000116667 | C1orf21      | -1.2 | 1.877E-05 | 0.0002249 | 7.425   | 0.226 | 7.238   | 7.676   | 9.484   | 0.577 | 8.910   | 10.065  |
| 812 | ENSG00000253313 | C1orf210     | 1.2  | 0.0345909 | 0.0960808 | 22.470  | 1.171 | 21.522  | 23.779  | 19.752  | 1.757 | 17.723  | 20.795  |
| 813 | ENSG00000142686 | C1orf216     | 1.2  | 0.0010766 | 0.0062464 | 11.998  | 0.769 | 11.372  | 12.856  | 10.034  | 0.370 | 9.654   | 10.393  |
| 814 | ENSG00000157181 | C1orf27      | -1.2 | 0.0008268 | 0.0050065 | 15.784  | 1.044 | 14.582  | 16.457  | 19.509  | 1.054 | 18.508  | 20.610  |
| 815 | ENSG00000143612 | C1orf43      | -1.1 | 7.071E-05 | 0.0006811 | 137.509 | 6.755 | 133.511 | 145.307 | 160.761 | 4.062 | 156.079 | 163.343 |
| 816 | ENSG00000162642 | C1orf52      | 1.2  | 9.652E-06 | 0.0001297 | 31.663  | 1.429 | 30.047  | 32.759  | 26.040  | 0.742 | 25.202  | 26.615  |
| 817 | ENSG00000118292 | C1orf54      | -1.2 | 0.0342704 | 0.0954137 | 18.013  | 1.628 | 16.431  | 19.684  | 21.473  | 1.746 | 19.564  | 22.990  |
| 818 | ENSG00000125462 | C1orf61      | 1.1  | 0.0724008 | 0.1681563 | 2.310   | 0.247 | 2.026   | 2.480   | 2.068   | 0.242 | 1.854   | 2.331   |

|     | A               | B        | C    | D         | E         | F       | G      | H       | I       | J       | K     | L       | M       |
|-----|-----------------|----------|------|-----------|-----------|---------|--------|---------|---------|---------|-------|---------|---------|
| 819 | ENSG00000142698 | C1orf94  | 1.2  | 0.0958043 | 0.2070455 | 5.636   | 0.759  | 4.760   | 6.075   | 4.882   | 0.944 | 4.160   | 5.950   |
| 820 | ENSG00000108561 | C1QBP    | -1   | 0.0964414 | 0.2078382 | 241.403 | 10.498 | 235.308 | 253.525 | 258.981 | 8.774 | 251.705 | 268.725 |
| 821 | ENSG00000165985 | C1QL3    | -1.5 | 0.0197333 | 0.0623247 | 1.347   | 0.121  | 1.244   | 1.481   | 2.120   | 0.473 | 1.674   | 2.616   |
| 823 | ENSG00000184163 | C1QTNF12 | -1.4 | 0.0280111 | 0.0819074 | 2.475   | 0.531  | 1.910   | 2.963   | 3.626   | 0.689 | 2.857   | 4.186   |
| 824 | ENSG00000082196 | C1QTNF3  | -1.4 | 0.1081696 | 0.2257214 | 0.552   | 0.143  | 0.417   | 0.702   | 0.804   | 0.171 | 0.608   | 0.918   |
| 825 | ENSG00000172247 | C1QTNF4  | -1.5 | 0.0128953 | 0.0447014 | 2.818   | 0.403  | 2.575   | 3.283   | 4.191   | 0.991 | 3.080   | 4.981   |
| 826 | ENSG00000088854 | C2orf194 | -1.2 | 0.0098553 | 0.0360231 | 6.664   | 0.453  | 6.258   | 7.152   | 7.891   | 0.567 | 7.298   | 8.428   |
| 827 | ENSG00000101220 | C2orf27  | -1.2 | 0.0009094 | 0.0054008 | 44.898  | 0.632  | 44.353  | 45.590  | 53.163  | 4.520 | 48.101  | 56.796  |
| 828 | ENSG00000160221 | C21orf33 | 1.2  | 0.0019723 | 0.0100625 | 31.569  | 1.248  | 30.482  | 32.932  | 27.863  | 2.483 | 25.005  | 29.489  |
| 829 | ENSG00000160298 | C21orf58 | -1.1 | 0.0770279 | 0.1760979 | 11.882  | 0.385  | 11.508  | 12.278  | 13.269  | 0.307 | 13.090  | 13.624  |
| 830 | ENSG00000215012 | C22orf29 | 1.2  | 0.0002808 | 0.0021013 | 11.272  | 0.872  | 10.309  | 12.009  | 9.506   | 0.269 | 9.200   | 9.702   |
| 831 | ENSG00000184208 | C22orf46 | 1.2  | 0.0012917 | 0.0071993 | 11.240  | 0.560  | 10.899  | 11.887  | 9.346   | 0.897 | 8.785   | 10.380  |
| 832 | ENSG00000172375 | C2CD2L   | -1.2 | 0.079304  | 0.1801812 | 0.654   | 0.045  | 0.625   | 0.705   | 0.832   | 0.081 | 0.775   | 0.925   |
| 833 | ENSG00000183186 | C2CD4C   | -1.4 | 0.0010826 | 0.0062727 | 3.930   | 0.255  | 3.681   | 4.190   | 5.567   | 0.711 | 4.747   | 5.998   |
| 834 | ENSG00000111731 | C2CD5    | -1.1 | 0.0010081 | 0.0059124 | 36.574  | 0.814  | 36.021  | 37.509  | 41.538  | 0.636 | 40.888  | 42.160  |
| 835 | ENSG00000273045 | C2orf15  | -1.3 | 0.0309803 | 0.0885234 | 4.191   | 0.493  | 3.871   | 4.758   | 5.504   | 0.646 | 4.852   | 6.144   |
| 836 | ENSG00000119147 | C2orf40  | 1.4  | 0.1015687 | 0.2155643 | 1.760   | 0.477  | 1.272   | 2.225   | 1.281   | 0.050 | 1.246   | 1.338   |
| 837 | ENSG00000115998 | C2orf42  | 1.3  | 0.0171385 | 0.0559042 | 3.931   | 0.151  | 3.826   | 4.104   | 3.175   | 0.032 | 3.145   | 3.209   |
| 839 | ENSG00000135974 | C2orf49  | -1.2 | 0.0001571 | 0.0013087 | 16.809  | 0.358  | 16.443  | 17.159  | 20.578  | 1.391 | 19.419  | 22.121  |
| 840 | ENSG00000172478 | C2orf54  | 4.9  | 8.541E-09 | 3.239E-07 | 2.136   | 0.609  | 1.666   | 2.825   | 0.439   | 0.074 | 0.361   | 0.508   |
| 841 | ENSG00000168887 | C2orf68  | -1.1 | 0.0203192 | 0.0638532 | 27.675  | 0.961  | 26.944  | 28.764  | 30.938  | 1.016 | 30.300  | 32.109  |
| 842 | ENSG00000178074 | C2orf69  | -1.2 | 0.0220471 | 0.0679809 | 28.063  | 1.969  | 26.652  | 30.313  | 33.668  | 0.936 | 32.788  | 34.652  |
| 843 | ENSG00000204128 | C2orf72  | 1.2  | 0.1166984 | 0.2380591 | 1.654   | 0.184  | 1.496   | 1.857   | 1.357   | 0.182 | 1.210   | 1.560   |
| 844 | ENSG00000174928 | C3orf33  | 1.3  | 0.0068846 | 0.0271357 | 7.032   | 0.561  | 6.702   | 7.680   | 5.575   | 0.092 | 5.497   | 5.676   |
| 845 | ENSG00000188315 | C3orf62  | 1.2  | 0.1122421 | 0.2316758 | 1.836   | 0.222  | 1.579   | 1.965   | 1.539   | 0.343 | 1.248   | 1.917   |
| 846 | ENSG00000180044 | C3orf80  | 2    | 0.023592  | 0.0717131 | 0.618   | 0.208  | 0.380   | 0.767   | 0.315   | 0.131 | 0.173   | 0.430   |
| 847 | ENSG00000244731 | C4A      | -1.4 | 0.0512049 | 0.1293351 | 0.462   | 0.032  | 0.438   | 0.498   | 0.660   | 0.126 | 0.557   | 0.800   |
| 848 | ENSG00000154274 | C4orf19  | 2    | 0.1180994 | 0.2401317 | 0.338   | 0.171  | 0.215   | 0.533   | 0.174   | 0.103 | 0.056   | 0.241   |
| 849 | ENSG00000151470 | C4orf33  | 1.4  | 0.0018437 | 0.009541  | 2.048   | 0.135  | 1.894   | 2.145   | 1.470   | 0.222 | 1.226   | 1.660   |
| 850 | ENSG00000205129 | C4orf47  | -1.7 | 0.004354  | 0.0189986 | 2.241   | 0.167  | 2.055   | 2.378   | 3.813   | 1.423 | 2.199   | 4.889   |
| 851 | ENSG00000106804 | C5       | 1.7  | 0.002424  | 0.011847  | 0.952   | 0.056  | 0.889   | 0.995   | 0.584   | 0.133 | 0.503   | 0.737   |
| 852 | ENSG00000082213 | C5orf22  | 1.1  | 0.0012632 | 0.0070861 | 32.668  | 2.618  | 29.675  | 34.532  | 29.078  | 0.158 | 28.961  | 29.258  |
| 853 | ENSG00000172244 | C5orf34  | 1.1  | 0.0385896 | 0.1040436 | 13.723  | 1.510  | 12.463  | 15.397  | 12.289  | 0.397 | 12.051  | 12.748  |
| 854 | ENSG00000197603 | C5orf42  | 1.2  | 2.416E-05 | 0.000279  | 5.961   | 0.284  | 5.636   | 6.165   | 4.930   | 0.050 | 4.892   | 4.988   |
| 855 | ENSG00000234511 | C5orf58  | -1.4 | 0.059856  | 0.1454309 | 0.913   | 0.109  | 0.787   | 0.980   | 1.300   | 0.074 | 1.217   | 1.360   |
| 856 | ENSG00000196821 | C6orf106 | 1.1  | 9.648E-05 | 0.0008779 | 114.587 | 1.985  | 112.575 | 116.543 | 104.037 | 6.190 | 98.960  | 110.933 |
| 857 | ENSG00000185127 | C6orf120 | -1.1 | 0.0459278 | 0.1190371 | 55.878  | 4.170  | 51.784  | 60.121  | 61.519  | 1.547 | 59.802  | 62.806  |
| 858 | ENSG00000188112 | C6orf132 | 1.1  | 0.0791996 | 0.1800897 | 15.241  | 1.769  | 13.316  | 16.797  | 14.321  | 0.823 | 13.371  | 14.836  |
| 859 | ENSG00000204564 | C6orf136 | -1.2 | 0.0368476 | 0.100533  | 9.998   | 0.799  | 9.215   | 10.812  | 11.992  | 0.290 | 11.658  | 12.184  |
| 860 | ENSG00000197261 | C6orf141 | -1.8 | 6.851E-06 | 9.64E-05  | 3.042   | 0.796  | 2.260   | 3.851   | 5.512   | 0.760 | 4.711   | 6.224   |
| 861 | ENSG00000203872 | C6orf163 | -2   | 0.0031423 | 0.0146369 | 0.600   | 0.152  | 0.512   | 0.775   | 1.219   | 0.266 | 0.915   | 1.410   |
| 862 | ENSG00000181577 | C6orf223 | 2.7  | 8.88E-11  | 5.823E-09 | 3.832   | 0.168  | 3.659   | 3.994   | 1.421   | 0.144 | 1.321   | 1.586   |

|     | A               | B           | C    | D         | E         | F       | G      | H       | I       | J       | K     | L       | M       |
|-----|-----------------|-------------|------|-----------|-----------|---------|--------|---------|---------|---------|-------|---------|---------|
| 863 | ENSG00000221821 | C6orf226    | -1.4 | 0.0083252 | 0.0315141 | 8.946   | 1.492  | 7.226   | 9.896   | 13.169  | 1.118 | 12.396  | 14.450  |
| 864 | ENSG00000204439 | C6orf47     | 1.1  | 0.0724433 | 0.168209  | 15.381  | 0.088  | 15.281  | 15.450  | 14.063  | 1.607 | 12.474  | 15.687  |
| 865 | ENSG00000204387 | C6orf48     | 1.3  | 2.988E-08 | 9.645E-07 | 134.577 | 8.644  | 125.161 | 142.152 | 107.407 | 2.824 | 104.246 | 109.684 |
| 866 | ENSG00000112308 | C6orf62     | 1.1  | 0.0038313 | 0.0171382 | 113.530 | 4.556  | 108.297 | 116.612 | 106.354 | 1.411 | 105.203 | 107.928 |
| 867 | ENSG00000198663 | C6orf89     | 1.1  | 0.0032444 | 0.014998  | 13.930  | 0.403  | 13.607  | 14.382  | 12.517  | 0.478 | 12.082  | 13.028  |
| 868 | ENSG00000146826 | C7orf43     | -1.2 | 0.0067584 | 0.026738  | 8.405   | 0.490  | 8.119   | 8.971   | 10.341  | 0.886 | 9.447   | 11.219  |
| 869 | ENSG00000122783 | C7orf49     | 1.3  | 8.094E-07 | 1.595E-05 | 14.233  | 0.947  | 13.485  | 15.299  | 10.977  | 0.381 | 10.699  | 11.412  |
| 870 | ENSG00000146540 | C7orf50     | 1.1  | 0.0173941 | 0.0565752 | 21.064  | 1.367  | 20.029  | 22.614  | 19.418  | 0.606 | 19.042  | 20.117  |
| 871 | ENSG00000243317 | C7orf73     | 1.1  | 0.033794  | 0.0944723 | 34.736  | 1.458  | 33.123  | 35.962  | 32.888  | 0.956 | 32.263  | 33.989  |
| 872 | ENSG00000182307 | C8orf33     | -1.2 | 1.081E-05 | 0.0001425 | 36.025  | 1.132  | 35.054  | 37.268  | 44.197  | 2.030 | 42.158  | 46.218  |
| 873 | ENSG00000241852 | C8orf58     | 1.2  | 0.0174938 | 0.0567458 | 8.976   | 0.159  | 8.813   | 9.131   | 7.727   | 1.232 | 6.412   | 8.855   |
| 874 | ENSG00000253250 | C8orf88     | 1.2  | 0.0056346 | 0.0232493 | 71.034  | 3.362  | 68.416  | 74.826  | 62.440  | 4.367 | 59.131  | 67.389  |
| 875 | ENSG00000160345 | C9orf116    | -1.2 | 0.0889312 | 0.1963055 | 4.027   | 0.264  | 3.723   | 4.201   | 4.974   | 0.512 | 4.387   | 5.332   |
| 876 | ENSG00000204711 | C9orf135    | 2.3  | 3.82E-12  | 3.545E-10 | 23.082  | 1.505  | 22.178  | 24.819  | 10.422  | 1.121 | 9.293   | 11.535  |
| 877 | ENSG00000171159 | C9orf16     | -1.2 | 0.0051403 | 0.021594  | 38.836  | 3.174  | 35.468  | 41.773  | 46.188  | 4.347 | 41.395  | 49.875  |
| 878 | ENSG00000148120 | C9orf3      | 1.4  | 0.000291  | 0.0021585 | 2.501   | 0.413  | 2.034   | 2.819   | 1.842   | 0.092 | 1.762   | 1.942   |
| 879 | ENSG00000147894 | C9orf72     | -1.1 | 0.0732822 | 0.1697141 | 24.143  | 0.936  | 23.104  | 24.921  | 26.626  | 2.533 | 24.773  | 29.512  |
| 880 | ENSG00000063180 | CA11        | 1.2  | 1.025E-05 | 0.0001362 | 105.696 | 10.759 | 93.425  | 113.516 | 87.868  | 4.656 | 82.679  | 91.683  |
| 881 | ENSG00000074410 | CA12        | -1.2 | 0.0420778 | 0.1111797 | 1.202   | 0.127  | 1.071   | 1.324   | 1.523   | 0.163 | 1.415   | 1.711   |
| 882 | ENSG00000185015 | CA13        | 1.2  | 0.1038317 | 0.2191297 | 1.349   | 0.114  | 1.229   | 1.455   | 1.125   | 0.097 | 1.019   | 1.208   |
| 883 | ENSG00000164879 | CA3         | 1.6  | 0.0833434 | 0.1873703 | 0.813   | 0.165  | 0.639   | 0.967   | 0.535   | 0.225 | 0.403   | 0.795   |
| 884 | ENSG00000168748 | CA7         | -1.4 | 0.0285207 | 0.0830242 | 1.963   | 0.416  | 1.507   | 2.320   | 2.848   | 0.255 | 2.599   | 3.108   |
| 885 | ENSG00000178538 | CA8         | -1.3 | 0.00584   | 0.0239043 | 3.943   | 0.647  | 3.375   | 4.647   | 5.063   | 0.425 | 4.726   | 5.541   |
| 886 | ENSG00000107159 | CA9         | 1.5  | 0.1175725 | 0.2394057 | 1.123   | 0.182  | 0.973   | 1.326   | 0.764   | 0.096 | 0.656   | 0.837   |
| 887 | ENSG00000135932 | CAB39       | 1.1  | 0.0049999 | 0.0211514 | 58.252  | 2.174  | 56.964  | 60.761  | 54.335  | 1.062 | 53.109  | 54.973  |
| 888 | ENSG00000134508 | CABLES1     | 1.4  | 5.881E-08 | 1.712E-06 | 10.393  | 0.453  | 10.102  | 10.915  | 7.490   | 0.392 | 7.165   | 7.925   |
| 889 | ENSG00000149679 | CABLES2     | -1.1 | 0.0919241 | 0.2012979 | 8.989   | 0.494  | 8.465   | 9.447   | 10.294  | 0.866 | 9.392   | 11.119  |
| 890 | ENSG00000154040 | CABYR       | 1.2  | 0.0003971 | 0.0027832 | 15.972  | 1.179  | 14.689  | 17.008  | 13.188  | 0.861 | 12.669  | 14.182  |
| 891 | ENSG00000158966 | CACHD1      | -1.2 | 1.081E-06 | 2.044E-05 | 28.126  | 2.221  | 26.745  | 30.689  | 35.679  | 2.105 | 33.298  | 37.294  |
| 893 | ENSG00000141837 | CACNA1A     | -1.4 | 7.75E-05  | 0.0007343 | 0.676   | 0.094  | 0.568   | 0.743   | 0.943   | 0.043 | 0.897   | 0.982   |
| 895 | ENSG00000148408 | CACNA1B     | 1.3  | 0.005681  | 0.0233834 | 2.972   | 0.377  | 2.544   | 3.252   | 2.421   | 0.317 | 2.074   | 2.694   |
| 896 | ENSG00000256271 | CACNA1C-AS2 | 1.6  | 0.0430057 | 0.112994  | 4.863   | 0.465  | 4.403   | 5.334   | 3.040   | 0.497 | 2.466   | 3.339   |
| 897 | ENSG00000102001 | CACNA1F     | -1.2 | 0.1153181 | 0.2359354 | 2.031   | 0.081  | 1.939   | 2.090   | 2.418   | 0.410 | 2.152   | 2.891   |
| 898 | ENSG00000006283 | CACNA1G     | -1.5 | 0.0006454 | 0.0041161 | 1.114   | 0.059  | 1.049   | 1.166   | 1.702   | 0.456 | 1.220   | 2.126   |
| 899 | ENSG00000196557 | CACNA1H     | -1.4 | 1.385E-07 | 3.621E-06 | 12.764  | 0.377  | 12.361  | 13.107  | 17.747  | 1.601 | 15.901  | 18.749  |
| 900 | ENSG00000007402 | CACNA2D2    | 1.4  | 3.348E-09 | 1.441E-07 | 28.430  | 2.466  | 25.666  | 30.403  | 21.281  | 0.744 | 20.432  | 21.820  |
| 901 | ENSG00000167535 | CACNB3      | 1.4  | 7.906E-05 | 0.0007466 | 5.177   | 0.263  | 4.892   | 5.411   | 3.900   | 0.293 | 3.593   | 4.176   |
| 902 | ENSG00000182389 | CACNB4      | -1.5 | 3.271E-05 | 0.0003578 | 0.411   | 0.051  | 0.353   | 0.452   | 0.636   | 0.077 | 0.565   | 0.718   |
| 903 | ENSG00000105605 | CACNG7      | -1.2 | 0.000379  | 0.0026763 | 59.161  | 1.393  | 57.634  | 60.362  | 69.633  | 2.383 | 67.291  | 72.055  |
| 905 | ENSG00000142408 | CACNG8      | -1.4 | 2.48E-07  | 5.957E-06 | 4.442   | 0.243  | 4.241   | 4.712   | 6.457   | 0.189 | 6.258   | 6.634   |
| 906 | ENSG00000116161 | CACYBP      | 1    | 0.1069486 | 0.2238365 | 69.748  | 1.117  | 68.924  | 71.019  | 68.017  | 2.824 | 65.423  | 71.025  |

|     | A               | B        | C    | D         | E         | F       | G      | H       | I       | J       | K      | L       | M       |
|-----|-----------------|----------|------|-----------|-----------|---------|--------|---------|---------|---------|--------|---------|---------|
| 907 | ENSG00000084774 | CAD      | -1.1 | 0.0002002 | 0.001598  | 63.921  | 3.613  | 59.973  | 67.064  | 74.057  | 4.899  | 69.503  | 79.239  |
| 908 | ENSG00000175161 | CADM2    | -1.4 | 5.75E-07  | 1.211E-05 | 5.100   | 0.426  | 4.792   | 5.587   | 7.330   | 0.578  | 6.731   | 7.885   |
| 909 | ENSG00000162706 | CADM3    | -1.1 | 0.1046316 | 0.22032   | 5.763   | 0.309  | 5.450   | 6.068   | 6.614   | 0.017  | 6.594   | 6.627   |
| 910 | ENSG00000105767 | CADM4    | 1.2  | 4.689E-05 | 0.0004862 | 46.027  | 2.996  | 43.979  | 49.466  | 38.436  | 2.915  | 35.610  | 41.432  |
| 911 | ENSG00000081803 | CADPS2   | 1.4  | 1.843E-07 | 4.66E-06  | 30.892  | 3.305  | 27.587  | 34.197  | 23.212  | 1.981  | 20.932  | 24.503  |
| 912 | ENSG00000270419 | CAHM     | -1.5 | 0.0268427 | 0.0791319 | 3.968   | 1.246  | 2.638   | 5.108   | 5.998   | 1.187  | 4.680   | 6.982   |
| 914 | ENSG00000104327 | CALB1    | 1.3  | 0.0001746 | 0.0014298 | 5.391   | 0.462  | 5.067   | 5.920   | 4.298   | 0.226  | 4.122   | 4.553   |
| 916 | ENSG00000172137 | CALB2    | -1.4 | 0.029286  | 0.0846835 | 2.376   | 0.391  | 1.925   | 2.603   | 3.504   | 1.033  | 2.646   | 4.651   |
| 917 | ENSG00000175868 | CALCB    | 1.6  | 5.411E-05 | 0.0005457 | 3.210   | 0.130  | 3.077   | 3.338   | 1.995   | 0.151  | 1.907   | 2.170   |
| 918 | ENSG00000012822 | CALCOCO1 | 1.2  | 0.0002824 | 0.0021107 | 7.596   | 0.037  | 7.566   | 7.638   | 6.224   | 0.807  | 5.364   | 6.964   |
| 919 | ENSG00000064989 | CALCRL   | 1.3  | 0.0052847 | 0.0220255 | 3.256   | 0.453  | 2.740   | 3.589   | 2.534   | 0.376  | 2.250   | 2.961   |
| 920 | ENSG00000122786 | CALD1    | 1.5  | 5.60E-16  | 1.33E-13  | 111.985 | 7.063  | 107.270 | 120.105 | 73.982  | 3.956  | 70.526  | 78.298  |
| 921 | ENSG00000198668 | CALM1    | 1.1  | 0.020052  | 0.0631588 | 103.445 | 3.144  | 101.283 | 107.051 | 99.376  | 3.415  | 95.562  | 102.149 |
| 923 | ENSG00000179218 | CALR     | 1.2  | 1.395E-06 | 2.511E-05 | 569.803 | 16.738 | 553.891 | 587.260 | 501.377 | 21.171 | 482.644 | 524.346 |
| 924 | ENSG00000183049 | CAMK1D   | -1.2 | 0.0010729 | 0.0062334 | 3.782   | 0.348  | 3.387   | 4.047   | 4.797   | 0.211  | 4.628   | 5.034   |
| 925 | ENSG00000145349 | CAMK2D   | 1.3  | 7.587E-07 | 1.522E-05 | 14.676  | 1.004  | 13.780  | 15.761  | 11.403  | 0.895  | 10.377  | 12.023  |
| 926 | ENSG00000148660 | CAMK2G   | -1.1 | 0.007594  | 0.0046634 | 18.229  | 0.351  | 18.021  | 18.634  | 21.327  | 0.535  | 20.992  | 21.943  |
| 927 | ENSG00000162545 | CAMK2N1  | -1.2 | 0.1022164 | 0.1665041 | 6.813   | 0.809  | 5.925   | 7.509   | 8.015   | 0.535  | 7.483   | 8.553   |
| 928 | ENSG00000152495 | CAMK4    | 1.1  | 0.0713957 | 0.1662559 | 1.750   | 0.038  | 1.709   | 1.784   | 1.558   | 0.183  | 1.392   | 1.754   |
| 929 | ENSG00000110931 | CAMKK2   | 1.3  | 2.093E-06 | 3.533E-05 | 24.393  | 0.962  | 23.283  | 24.982  | 19.726  | 2.024  | 18.131  | 22.003  |
| 930 | ENSG00000143919 | CAMKMT   | 1.2  | 0.006242  | 0.025118  | 10.852  | 0.684  | 10.210  | 11.572  | 9.320   | 0.909  | 8.280   | 9.962   |
| 931 | ENSG00000164076 | CAMKV    | -1.4 | 3.343E-10 | 1.885E-08 | 28.133  | 1.120  | 26.841  | 28.842  | 40.533  | 2.913  | 37.314  | 42.990  |
| 932 | ENSG00000164615 | CAMLG    | -1.3 | 4.015E-07 | 8.959E-06 | 59.056  | 4.467  | 55.811  | 64.150  | 76.964  | 1.307  | 75.797  | 78.376  |
| 933 | ENSG00000130559 | CAMSAP1  | -1.1 | 0.013814  | 0.0472757 | 18.425  | 0.436  | 18.036  | 18.896  | 20.508  | 0.702  | 19.775  | 21.174  |
| 934 | ENSG00000118200 | CAMSAP2  | 1.1  | 0.1057011 | 0.2217914 | 29.864  | 0.318  | 29.521  | 30.148  | 28.944  | 1.691  | 27.757  | 30.880  |
| 935 | ENSG00000076826 | CAMSAP3  | -1.4 | 4.794E-07 | 1.044E-05 | 7.673   | 0.153  | 7.503   | 7.801   | 11.166  | 1.294  | 10.299  | 12.654  |
| 936 | ENSG00000108509 | CAMTA2   | -1.2 | 0.0079144 | 0.030401  | 4.658   | 0.298  | 4.433   | 4.996   | 5.794   | 0.676  | 5.333   | 6.570   |
| 937 | ENSG00000111530 | CAND1    | -1   | 0.06471   | 0.1542488 | 62.940  | 0.164  | 62.775  | 63.102  | 67.370  | 1.970  | 65.100  | 68.630  |
| 938 | ENSG00000127022 | CANX     | 1.1  | 0.0017206 | 0.0090572 | 307.400 | 12.737 | 297.564 | 321.787 | 289.044 | 3.446  | 286.058 | 292.815 |
| 939 | ENSG00000131236 | CAP1     | 1.1  | 0.0015957 | 0.008511  | 185.756 | 6.788  | 177.950 | 190.272 | 174.160 | 3.235  | 170.528 | 176.732 |
| 940 | ENSG00000112186 | CAP2     | -1.1 | 0.0237161 | 0.0720065 | 17.850  | 0.490  | 17.369  | 18.349  | 20.286  | 0.514  | 19.953  | 20.878  |
| 941 | ENSG00000042493 | CAPG     | -1.1 | 0.0263669 | 0.0780578 | 63.733  | 1.232  | 62.904  | 65.149  | 70.332  | 1.881  | 68.304  | 72.020  |
| 942 | ENSG00000142330 | CAPN10   | -1.2 | 0.0037858 | 0.0169657 | 8.652   | 0.611  | 8.093   | 9.304   | 10.333  | 0.922  | 9.496   | 11.321  |
| 943 | ENSG00000162949 | CAPN13   | 1.7  | 7.023E-07 | 1.426E-05 | 3.634   | 0.235  | 3.472   | 3.903   | 2.177   | 0.136  | 2.090   | 2.334   |
| 944 | ENSG00000103326 | CAPN15   | -1.1 | 0.0024609 | 0.0120085 | 16.614  | 0.057  | 16.565  | 16.676  | 19.446  | 1.915  | 18.102  | 21.638  |
| 945 | ENSG00000149260 | CAPN5    | -1.1 | 0.0253289 | 0.0757137 | 8.369   | 0.571  | 7.715   | 8.771   | 9.621   | 0.797  | 8.742   | 10.298  |
| 946 | ENSG00000131375 | CAPN7    | 1.1  | 0.0580786 | 0.1421906 | 23.760  | 1.247  | 22.629  | 25.098  | 22.479  | 0.766  | 21.722  | 23.253  |
| 947 | ENSG00000135387 | CAPRIN1  | -1.1 | 0.0014387 | 0.0078211 | 198.617 | 1.676  | 197.583 | 200.551 | 219.552 | 1.484  | 218.255 | 221.170 |
| 948 | ENSG00000110888 | CAPRIN2  | 1.9  | 7.91E-21  | 6.37E-18  | 64.723  | 3.259  | 62.307  | 68.430  | 35.131  | 1.696  | 34.124  | 37.088  |
| 949 | ENSG00000100065 | CARD10   | 1.2  | 0.0003257 | 0.0023598 | 11.804  | 0.801  | 10.998  | 12.600  | 9.824   | 0.904  | 8.903   | 10.709  |
| 950 | ENSG00000198286 | CARD11   | 1.2  | 3.689E-05 | 0.0003966 | 22.444  | 0.865  | 21.492  | 23.180  | 18.973  | 0.994  | 17.981  | 19.969  |
| 951 | ENSG00000138380 | CARF     | 1.1  | 0.0794762 | 0.1804028 | 5.012   | 0.370  | 4.642   | 5.383   | 4.601   | 0.305  | 4.365   | 4.945   |

|     | A               | B        | C    | D         | E         | F       | G     | H       | I       | J       | K     | L      | M       |
|-----|-----------------|----------|------|-----------|-----------|---------|-------|---------|---------|---------|-------|--------|---------|
| 953 | ENSG00000153048 | CARHSP1  | -1.2 | 2.16E-05  | 0.000254  | 69.844  | 1.896 | 67.720  | 71.366  | 82.738  | 5.387 | 76.546 | 86.346  |
| 954 | ENSG00000079691 | CARMIL1  | -1.1 | 0.0052916 | 0.022049  | 22.540  | 0.483 | 22.110  | 23.062  | 25.541  | 1.135 | 24.303 | 26.534  |
| 955 | ENSG00000186648 | CARMIL3  | -1.2 | 0.0283159 | 0.0825712 | 2.778   | 0.132 | 2.682   | 2.928   | 3.422   | 0.492 | 2.854  | 3.728   |
| 956 | ENSG00000156017 | CARNMT1  | 1.2  | 0.0007075 | 0.0044091 | 30.633  | 0.648 | 30.234  | 31.381  | 27.066  | 1.223 | 25.670 | 27.947  |
| 957 | ENSG00000172508 | CARNS1   | -1.6 | 0.0076957 | 0.0297094 | 0.488   | 0.040 | 0.443   | 0.521   | 0.814   | 0.163 | 0.662  | 0.986   |
| 959 | ENSG00000110619 | CARS     | 1.4  | 1.00E-13  | 1.40E-11  | 28.866  | 0.418 | 28.390  | 29.174  | 20.584  | 1.346 | 19.124 | 21.776  |
| 960 | ENSG00000134905 | CARS2    | 1.1  | 0.0162651 | 0.0537918 | 7.449   | 0.417 | 6.987   | 7.797   | 6.692   | 0.580 | 6.072  | 7.222   |
| 961 | ENSG00000108349 | CASC3    | -1.1 | 0.0563787 | 0.1391002 | 62.552  | 2.648 | 59.613  | 64.755  | 67.715  | 1.387 | 66.433 | 69.187  |
| 962 | ENSG00000127995 | CASD1    | -1.1 | 0.0963753 | 0.2077857 | 24.469  | 0.849 | 23.628  | 25.325  | 26.884  | 1.933 | 25.014 | 28.875  |
| 963 | ENSG00000147044 | CASK     | -1.1 | 0.0013418 | 0.0074089 | 31.881  | 0.748 | 31.314  | 32.729  | 35.878  | 0.836 | 35.296 | 36.836  |
| 964 | ENSG00000167971 | CASKIN1  | -1.2 | 0.057765  | 0.1416323 | 2.500   | 0.464 | 2.032   | 2.960   | 3.056   | 0.380 | 2.743  | 3.479   |
| 965 | ENSG00000177303 | CASKIN2  | -1.2 | 0.0144564 | 0.0490276 | 7.998   | 0.581 | 7.531   | 8.648   | 9.433   | 0.878 | 8.588  | 10.341  |
| 966 | ENSG00000106144 | CASP2    | 1.2  | 0.0009445 | 0.0055817 | 11.028  | 0.939 | 9.960   | 11.722  | 9.527   | 0.484 | 9.010  | 9.967   |
| 967 | ENSG00000164305 | CASP3    | 1.2  | 1.101E-06 | 2.073E-05 | 114.805 | 5.199 | 110.210 | 120.448 | 97.916  | 5.056 | 93.533 | 103.448 |
| 968 | ENSG00000138794 | CASP6    | 1.1  | 0.0131368 | 0.0453989 | 37.124  | 0.542 | 36.499  | 37.462  | 33.603  | 1.173 | 32.922 | 34.958  |
| 969 | ENSG00000064012 | CASP8    | 1.2  | 0.006694  | 0.0265535 | 3.292   | 0.108 | 3.168   | 3.366   | 2.693   | 0.220 | 2.442  | 2.852   |
| 970 | ENSG00000118412 | CASP8AP2 | 1.1  | 0.0472564 | 0.1216326 | 16.093  | 0.927 | 15.034  | 16.756  | 14.951  | 0.373 | 14.624 | 15.357  |
| 971 | ENSG00000153113 | CAST     | 1.2  | 7.499E-07 | 1.51E-05  | 16.773  | 1.213 | 15.407  | 17.725  | 13.872  | 0.375 | 13.594 | 14.298  |
| 972 | ENSG00000274070 | CASTOR2  | -1.3 | 0.0932563 | 0.2030699 | 3.884   | 0.543 | 3.470   | 4.498   | 5.015   | 0.758 | 4.196  | 5.694   |
| 973 | ENSG00000130940 | CASZ1    | -1.1 | 0.1180627 | 0.2400898 | 1.577   | 0.158 | 1.395   | 1.669   | 1.828   | 0.079 | 1.740  | 1.890   |
| 974 | ENSG00000121691 | CAT      | 1.2  | 0.0018398 | 0.0095364 | 26.701  | 1.796 | 24.879  | 28.471  | 23.569  | 0.526 | 23.061 | 24.112  |
| 975 | ENSG00000133962 | CATSPERB | -1.5 | 0.066172  | 0.1570099 | 0.405   | 0.093 | 0.318   | 0.502   | 0.606   | 0.095 | 0.527  | 0.711   |
| 976 | ENSG00000099338 | CATSPERG | -1.6 | 0.0056531 | 0.0233013 | 0.392   | 0.059 | 0.337   | 0.454   | 0.638   | 0.194 | 0.472  | 0.851   |
| 977 | ENSG00000105974 | CAV1     | 1.4  | 0.0007893 | 0.0048177 | 7.833   | 1.917 | 6.132   | 9.910   | 5.671   | 0.405 | 5.364  | 6.130   |
| 978 | ENSG00000105971 | CAV2     | 1.7  | 2.196E-06 | 3.667E-05 | 2.352   | 0.181 | 2.218   | 2.558   | 1.395   | 0.210 | 1.197  | 1.614   |
| 979 | ENSG00000177469 | CAVIN1   | 1.3  | 9.791E-08 | 2.684E-06 | 85.852  | 8.183 | 76.407  | 90.800  | 67.183  | 3.161 | 64.174 | 70.478  |
| 980 | ENSG00000170955 | CAVIN3   | -1.2 | 0.047477  | 0.1220146 | 10.512  | 0.438 | 10.073  | 10.950  | 12.550  | 1.431 | 11.079 | 13.937  |
| 982 | ENSG00000067955 | CBFB     | 1.2  | 1.542E-05 | 0.0001904 | 34.379  | 0.950 | 33.326  | 35.173  | 29.164  | 1.161 | 27.992 | 30.314  |
| 983 | ENSG00000142273 | CBLC     | -1.3 | 0.0001799 | 0.001468  | 21.015  | 1.633 | 19.169  | 22.269  | 27.834  | 2.143 | 25.366 | 29.220  |
| 984 | ENSG00000102924 | CBLN1    | -1.6 | 0.0020932 | 0.0105238 | 1.542   | 0.179 | 1.366   | 1.723   | 2.497   | 0.177 | 2.351  | 2.694   |
| 985 | ENSG00000139899 | CBLN3    | -1.5 | 0.0738873 | 0.1705782 | 0.811   | 0.366 | 0.519   | 1.221   | 1.264   | 0.179 | 1.099  | 1.455   |
| 986 | ENSG00000159228 | CBR1     | 1.4  | 2.53E-12  | 2.531E-10 | 109.848 | 2.434 | 108.121 | 112.632 | 81.187  | 4.719 | 75.811 | 84.647  |
| 987 | ENSG00000159231 | CBR3     | 1.4  | 0.1231445 | 0.2476587 | 2.154   | 0.458 | 1.643   | 2.526   | 1.549   | 0.198 | 1.328  | 1.713   |
| 988 | ENSG00000145439 | CBR4     | 1.1  | 0.0017639 | 0.0092248 | 40.150  | 1.858 | 38.024  | 41.459  | 36.776  | 0.723 | 36.207 | 37.590  |
| 989 | ENSG00000160200 | CBS      | 1.1  | 0.0093827 | 0.0345771 | 70.219  | 1.813 | 68.332  | 71.948  | 66.551  | 2.856 | 63.253 | 68.232  |
| 990 | ENSG00000274276 | CBSL     | 1.1  | 0.0013129 | 0.0072824 | 112.023 | 3.184 | 108.391 | 114.331 | 103.953 | 4.219 | 99.094 | 106.694 |
| 991 | ENSG00000172785 | CBWD1    | 1.1  | 0.0175429 | 0.0568534 | 8.881   | 0.205 | 8.720   | 9.112   | 8.189   | 0.206 | 7.998  | 8.406   |
| 992 | ENSG00000136682 | CBWD2    | 1.1  | 0.0107931 | 0.0387815 | 12.656  | 0.283 | 12.342  | 12.894  | 11.635  | 0.290 | 11.454 | 11.970  |
| 993 | ENSG00000147996 | CBWD5    | 1.1  | 0.0143924 | 0.0488598 | 4.745   | 0.017 | 4.726   | 4.758   | 4.270   | 0.123 | 4.128  | 4.355   |
| 994 | ENSG00000215126 | CBWD6    | 1.1  | 0.0303653 | 0.0870456 | 5.047   | 0.134 | 4.910   | 5.177   | 4.599   | 0.158 | 4.472  | 4.776   |
| 995 | ENSG00000173894 | CBX2     | -1.1 | 0.0950801 | 0.2059927 | 59.821  | 5.013 | 54.156  | 63.686  | 65.275  | 5.910 | 58.603 | 69.853  |



|      | A               | B         | C    | D         | E         | F       | G     | H       | I       | J       | K     | L       | M       |
|------|-----------------|-----------|------|-----------|-----------|---------|-------|---------|---------|---------|-------|---------|---------|
| 996  | ENSG00000122565 | CBX3      | 1    | 0.1028085 | 0.2174588 | 191.122 | 4.266 | 187.828 | 195.941 | 186.860 | 4.474 | 183.971 | 192.014 |
| 997  | ENSG00000094916 | CBX5      | -1.3 | 9.38E-12  | 8.056E-10 | 86.576  | 2.110 | 84.145  | 87.927  | 111.721 | 3.710 | 107.908 | 115.317 |
| 998  | ENSG00000100307 | CBX7      | 1.2  | 0.006433  | 0.0257212 | 8.378   | 0.085 | 8.297   | 8.467   | 7.376   | 0.392 | 7.024   | 7.798   |
| 999  | ENSG00000100211 | CBY1      | 1.2  | 0.0010188 | 0.0059641 | 23.698  | 1.947 | 21.834  | 25.718  | 19.860  | 0.404 | 19.517  | 20.305  |
| 1000 | ENSG00000132024 | CC2D1A    | -1.1 | 0.0125958 | 0.04387   | 14.307  | 0.998 | 13.156  | 14.924  | 16.720  | 0.921 | 15.810  | 17.652  |
| 1001 | ENSG00000060339 | CCAR1     | -1.1 | 5.555E-05 | 0.0005579 | 60.390  | 3.549 | 57.514  | 64.355  | 70.954  | 4.078 | 68.589  | 75.662  |
| 1002 | ENSG00000158941 | CCAR2     | -1.1 | 0.0776533 | 0.1773047 | 53.271  | 2.556 | 50.345  | 55.066  | 57.365  | 1.853 | 55.297  | 58.873  |
| 1003 | ENSG00000183287 | CCBE1     | -1.7 | 2.726E-09 | 1.191E-07 | 4.683   | 0.688 | 4.281   | 5.477   | 7.998   | 0.818 | 7.060   | 8.561   |
| 1004 | ENSG00000164221 | CCDC112   | 1.2  | 0.0035811 | 0.0162452 | 20.494  | 0.861 | 19.662  | 21.381  | 17.495  | 1.332 | 15.978  | 18.470  |
| 1005 | ENSG00000103021 | CCDC113   | 1.2  | 0.0001938 | 0.0015568 | 13.013  | 0.464 | 12.737  | 13.549  | 10.979  | 0.410 | 10.615  | 11.424  |
| 1006 | ENSG00000105479 | CCDC114   | -1.3 | 0.0474445 | 0.1219907 | 1.516   | 0.089 | 1.442   | 1.615   | 2.069   | 0.348 | 1.747   | 2.437   |
| 1007 | ENSG00000159873 | CCDC117   | -1.2 | 2.527E-05 | 0.0002899 | 63.390  | 0.466 | 62.867  | 63.761  | 75.005  | 3.027 | 72.373  | 78.313  |
| 1008 | ENSG00000147144 | CCDC120   | 1.1  | 0.0275168 | 0.0806432 | 6.601   | 0.115 | 6.469   | 6.668   | 5.876   | 0.290 | 5.555   | 6.117   |
| 1009 | ENSG00000151773 | CCDC122   | 1.2  | 0.056441  | 0.1391867 | 4.495   | 0.217 | 4.246   | 4.645   | 3.971   | 0.212 | 3.749   | 4.170   |
| 1010 | ENSG00000007080 | CCDC124   | -1.2 | 0.0005937 | 0.0038517 | 66.327  | 2.247 | 64.080  | 68.575  | 78.889  | 4.101 | 74.188  | 81.734  |
| 1011 | ENSG00000183323 | CCDC125   | 1.1  | 0.122477  | 0.2466604 | 3.710   | 0.208 | 3.558   | 3.946   | 3.375   | 0.274 | 3.093   | 3.640   |
| 1012 | ENSG00000100147 | CCDC134   | -1.2 | 0.0228797 | 0.0700459 | 9.990   | 0.431 | 9.620   | 10.463  | 12.643  | 0.462 | 12.228  | 13.141  |
| 1013 | ENSG00000163006 | CCDC138   | 1.2  | 0.0072234 | 0.0281951 | 13.204  | 0.171 | 13.042  | 13.382  | 11.635  | 0.833 | 11.085  | 12.593  |
| 1014 | ENSG00000163492 | CCDC141   | 1.2  | 0.0480959 | 0.1232493 | 0.991   | 0.206 | 0.841   | 1.226   | 0.823   | 0.065 | 0.754   | 0.884   |
| 1015 | ENSG00000135637 | CCDC142   | -1.4 | 0.0364504 | 0.0998033 | 1.088   | 0.600 | 0.700   | 1.779   | 1.602   | 0.163 | 1.431   | 1.757   |
| 1016 | ENSG00000154874 | CCDC144B  | 1.3  | 0.0549329 | 0.1365732 | 0.814   | 0.107 | 0.700   | 0.912   | 0.647   | 0.103 | 0.541   | 0.746   |
| 1017 | ENSG00000181982 | CCDC149   | -1.2 | 0.0333851 | 0.09367   | 1.675   | 0.245 | 1.465   | 1.944   | 2.060   | 0.171 | 1.864   | 2.177   |
| 1018 | ENSG00000149548 | CCDC15    | 1.2  | 0.0216295 | 0.0670615 | 3.430   | 0.266 | 3.124   | 3.614   | 2.818   | 0.097 | 2.756   | 2.930   |
| 1019 | ENSG00000144395 | CCDC150   | -1.1 | 0.0127351 | 0.0442369 | 5.359   | 0.236 | 5.201   | 5.630   | 6.247   | 0.232 | 5.982   | 6.411   |
| 1020 | ENSG00000256304 | CCDC150P1 | 1.2  | 0.0290295 | 0.0841432 | 9.697   | 0.716 | 8.871   | 10.132  | 8.176   | 1.423 | 6.567   | 9.267   |
| 1021 | ENSG00000198865 | CCDC152   | 1.1  | 0.0050551 | 0.0213155 | 23.875  | 0.987 | 22.736  | 24.486  | 21.454  | 0.815 | 20.695  | 22.315  |
| 1022 | ENSG00000183401 | CCDC159   | -1.4 | 0.0353936 | 0.0977197 | 0.887   | 0.256 | 0.618   | 1.127   | 1.294   | 0.018 | 1.273   | 1.308   |
| 1023 | ENSG00000242715 | CCDC169   | 1.2  | 0.0012144 | 0.0068674 | 7.982   | 0.810 | 7.300   | 8.877   | 6.619   | 0.755 | 5.922   | 7.422   |
| 1024 | ENSG00000159588 | CCDC17    | -2   | 0.0014389 | 0.0078211 | 0.550   | 0.066 | 0.493   | 0.622   | 1.115   | 0.142 | 0.954   | 1.224   |
| 1025 | ENSG00000182645 | CCDC172   | -1.3 | 0.0956571 | 0.2068626 | 3.363   | 0.639 | 2.659   | 3.908   | 4.347   | 0.565 | 3.758   | 4.884   |
| 1026 | ENSG00000154781 | CCDC174   | -1.1 | 0.0253765 | 0.075829  | 13.899  | 0.496 | 13.378  | 14.366  | 16.042  | 0.498 | 15.701  | 16.614  |
| 1027 | ENSG00000122483 | CCDC18    | 1.2  | 0.0013813 | 0.0075752 | 16.151  | 1.052 | 15.076  | 17.179  | 13.586  | 1.310 | 12.078  | 14.428  |
| 1028 | ENSG00000165813 | CCDC186   | -1.2 | 0.0001044 | 0.0009348 | 11.839  | 0.071 | 11.798  | 11.922  | 14.622  | 0.575 | 14.020  | 15.165  |
| 1029 | ENSG00000147419 | CCDC25    | 1.1  | 0.0937934 | 0.2040031 | 50.531  | 0.318 | 50.346  | 50.897  | 48.945  | 1.771 | 47.823  | 50.987  |
| 1030 | ENSG00000186409 | CCDC30    | 1.3  | 0.1005269 | 0.213917  | 0.459   | 0.038 | 0.416   | 0.487   | 0.365   | 0.073 | 0.313   | 0.449   |
| 1031 | ENSG00000140481 | CCDC33    | -1.4 | 0.0075878 | 0.0293503 | 0.838   | 0.199 | 0.648   | 1.045   | 1.224   | 0.070 | 1.157   | 1.297   |
| 1032 | ENSG00000145075 | CCDC39    | 1.4  | 0.114964  | 0.2355422 | 0.558   | 0.075 | 0.484   | 0.634   | 0.406   | 0.213 | 0.262   | 0.651   |
| 1033 | ENSG00000152492 | CCDC50    | 1.1  | 0.0056861 | 0.023393  | 19.036  | 0.919 | 18.319  | 20.072  | 17.496  | 0.668 | 16.725  | 17.882  |
| 1034 | ENSG00000164051 | CCDC51    | -1.2 | 0.004169  | 0.0183575 | 15.961  | 1.094 | 14.713  | 16.753  | 19.272  | 0.748 | 18.430  | 19.858  |
| 1035 | ENSG00000176155 | CCDC57    | -1.2 | 0.0258843 | 0.0769626 | 1.239   | 0.286 | 0.953   | 1.526   | 1.577   | 0.251 | 1.413   | 1.867   |
| 1036 | ENSG00000160124 | CCDC58    | -1.1 | 0.0055672 | 0.0229936 | 52.010  | 1.243 | 51.226  | 53.443  | 60.005  | 2.866 | 57.254  | 62.974  |

|      | A               | B        | C    | D         | E         | F       | G      | H       | I        | J       | K      | L       | M       |
|------|-----------------|----------|------|-----------|-----------|---------|--------|---------|----------|---------|--------|---------|---------|
| 1038 | ENSG00000108091 | CCDC6    | -1.2 | 2.174E-06 | 3.633E-05 | 35.145  | 1.421  | 33.621  | 36.434   | 42.397  | 0.656  | 41.875  | 43.133  |
| 1039 | ENSG00000104983 | CCDC61   | -1.3 | 0.0005952 | 0.0038596 | 8.245   | 1.159  | 7.022   | 9.326    | 11.265  | 0.639  | 10.801  | 11.994  |
| 1040 | ENSG00000180376 | CCDC66   | 1.1  | 0.0356126 | 0.0980811 | 9.352   | 0.359  | 8.939   | 9.581    | 8.628   | 0.492  | 8.061   | 8.928   |
| 1042 | ENSG00000177352 | CCDC71   | -1.2 | 0.0162591 | 0.0537912 | 17.967  | 1.273  | 16.497  | 18.738   | 21.436  | 2.022  | 19.865  | 23.718  |
| 1043 | ENSG00000253276 | CCDC71L  | 1.1  | 0.019801  | 0.0625035 | 9.731   | 0.597  | 9.042   | 10.083   | 8.653   | 0.488  | 8.110   | 9.054   |
| 1044 | ENSG00000163040 | CCDC74A  | 1.3  | 0.0001855 | 0.0015025 | 10.223  | 0.621  | 9.669   | 10.894   | 7.915   | 0.474  | 7.369   | 8.217   |
| 1045 | ENSG00000162004 | CCDC78   | -1.3 | 0.0321582 | 0.091148  | 1.999   | 0.439  | 1.581   | 2.457    | 2.648   | 0.157  | 2.495   | 2.809   |
| 1046 | ENSG00000149231 | CCDC82   | 1.1  | 0.0272479 | 0.0800911 | 11.678  | 0.434  | 11.424  | 12.180   | 10.666  | 0.925  | 9.704   | 11.548  |
| 1047 | ENSG00000186166 | CCDC84   | 1.1  | 0.0567772 | 0.139676  | 9.289   | 0.143  | 9.149   | 9.435    | 8.493   | 0.479  | 8.092   | 9.023   |
| 1048 | ENSG00000205476 | CCDC85C  | -1.1 | 0.0082153 | 0.0312306 | 5.506   | 0.301  | 5.191   | 5.791    | 6.352   | 0.592  | 5.719   | 6.893   |
| 1049 | ENSG00000168071 | CCDC88B  | -1.2 | 0.0092101 | 0.0340333 | 5.002   | 0.283  | 4.735   | 5.299    | 5.938   | 0.373  | 5.509   | 6.186   |
| 1051 | ENSG00000015133 | CCDC88C  | -1.1 | 0.0003006 | 0.0022162 | 14.452  | 0.477  | 14.078  | 14.989   | 16.954  | 1.284  | 15.589  | 18.137  |
| 1052 | ENSG00000137500 | CCDC90B  | 1.2  | 0.0001571 | 0.0013087 | 32.057  | 3.134  | 29.475  | 35.544   | 27.924  | 1.107  | 26.662  | 28.730  |
| 1054 | ENSG00000125633 | CCDC93   | -1.1 | 0.0675395 | 0.1594494 | 16.090  | 0.636  | 15.388  | 16.626   | 17.647  | 0.818  | 16.984  | 18.561  |
| 1056 | ENSG00000108691 | CCL2     | -1.4 | 0.1055812 | 0.2216328 | 1.268   | 0.075  | 1.189   | 1.339    | 1.784   | 0.308  | 1.429   | 1.969   |
| 1058 | ENSG00000006606 | CCL26    | -1.2 | 0.0912278 | 0.2003821 | 9.786   | 1.536  | 8.230   | 11.300   | 12.272  | 1.669  | 10.412  | 13.638  |
| 1060 | ENSG00000136280 | CCM2     | 1.2  | 0.0020994 | 0.0105426 | 8.487   | 0.329  | 8.107   | 8.683    | 7.439   | 0.260  | 7.194   | 7.712   |
| 1061 | ENSG00000133101 | CCNA1    | -1.3 | 0.061622  | 0.1485268 | 2.388   | 0.423  | 2.031   | 2.856    | 3.214   | 0.830  | 2.329   | 3.975   |
| 1063 | ENSG00000145386 | CCNA2    | -1.1 | 0.000183  | 0.0014869 | 197.027 | 3.372  | 193.625 | 200.368  | 228.544 | 14.061 | 219.283 | 244.724 |
| 1064 | ENSG00000134057 | CCNB1    | -1.2 | 2.562E-07 | 6.129E-06 | 338.198 | 27.317 | 311.017 | 365.649  | 420.869 | 15.977 | 410.501 | 439.269 |
| 1065 | ENSG00000100814 | CCNB1IP1 | 1.2  | 1.162E-08 | 4.264E-07 | 170.235 | 6.799  | 162.386 | 174.285  | 141.711 | 3.455  | 139.263 | 145.663 |
| 1066 | ENSG00000157456 | CCNB2    | -1.1 | 0.0032351 | 0.0149698 | 153.980 | 3.887  | 150.208 | 157.972  | 172.573 | 3.147  | 169.409 | 175.703 |
| 1067 | ENSG00000110092 | CCND1    | 1.3  | 6.915E-07 | 1.409E-05 | 114.652 | 12.446 | 101.212 | 125.778  | 90.727  | 3.457  | 87.175  | 94.080  |
| 1068 | ENSG00000112576 | CCND3    | -1.1 | 0.0254828 | 0.076066  | 8.358   | 0.413  | 7.914   | 8.731    | 9.684   | 0.962  | 8.833   | 10.729  |
| 1069 | ENSG00000175305 | CCNE2    | 1.4  | 0.0002692 | 0.0020283 | 4.010   | 0.362  | 3.694   | 4.405    | 2.899   | 0.167  | 2.739   | 3.073   |
| 1070 | ENSG00000162063 | CCNF     | -1.3 | 5.38E-07  | 1.152E-05 | 22.134  | 0.792  | 21.647  | 23.048   | 28.726  | 2.681  | 26.265  | 31.582  |
| 1071 | ENSG00000113328 | CCNG1    | 1.1  | 3.205E-05 | 0.0003529 | 961.384 | 51.805 | 915.276 | 1017.442 | 865.322 | 31.148 | 835.387 | 897.556 |
| 1073 | ENSG00000138764 | CCNG2    | -1.1 | 0.0030528 | 0.0143026 | 10.170  | 0.406  | 9.921   | 10.639   | 11.846  | 0.440  | 11.433  | 12.309  |
| 1074 | ENSG00000134480 | CCNH     | -1.1 | 0.0453906 | 0.1179431 | 17.842  | 0.058  | 17.786  | 17.901   | 19.889  | 0.801  | 19.332  | 20.807  |
| 1075 | ENSG00000118816 | CCNI     | -1.1 | 0.0007287 | 0.0045164 | 176.207 | 5.821  | 170.338 | 181.979  | 198.185 | 7.690  | 189.340 | 203.289 |
| 1076 | ENSG00000163660 | CCNL1    | -1.1 | 0.0106437 | 0.0383341 | 30.143  | 0.266  | 29.837  | 30.312   | 33.707  | 0.318  | 33.341  | 33.917  |
| 1077 | ENSG00000221978 | CCNL2    | -1.2 | 2.54E-07  | 6.085E-06 | 30.790  | 0.831  | 30.145  | 31.727   | 38.629  | 1.268  | 37.884  | 40.093  |
| 1080 | ENSG00000163249 | CCNYL1   | 1.1  | 0.0741343 | 0.1710084 | 31.719  | 1.759  | 29.689  | 32.800   | 30.332  | 0.458  | 29.987  | 30.852  |
| 1082 | ENSG00000103540 | CCP110   | -1.1 | 0.0211479 | 0.0659222 | 14.127  | 1.094  | 13.192  | 15.329   | 16.013  | 1.352  | 14.516  | 17.146  |
| 1085 | ENSG00000184305 | CCSER1   | -1.7 | 0.0046754 | 0.0200903 | 0.260   | 0.035  | 0.227   | 0.297    | 0.449   | 0.095  | 0.343   | 0.525   |
| 1086 | ENSG00000107771 | CCSER2   | 1.2  | 0.000621  | 0.0039917 | 12.143  | 0.382  | 11.708  | 12.426   | 10.642  | 0.805  | 9.821   | 11.431  |
| 1087 | ENSG00000166226 | CCT2     | -1.1 | 0.0007097 | 0.0044142 | 198.121 | 0.586  | 197.590 | 198.750  | 221.838 | 6.126  | 215.055 | 226.969 |
| 1088 | ENSG00000163468 | CCT3     | -1.2 | 4.759E-08 | 1.435E-06 | 259.080 | 1.450  | 258.122 | 260.748  | 310.030 | 4.806  | 304.492 | 313.111 |
| 1089 | ENSG00000115484 | CCT4     | -1.2 | 2.297E-09 | 1.033E-07 | 384.093 | 6.115  | 377.146 | 388.665  | 473.806 | 11.792 | 460.795 | 483.787 |
| 1090 | ENSG00000146731 | CCT6A    | -1.2 | 1.642E-06 | 2.861E-05 | 270.826 | 8.734  | 263.159 | 280.333  | 319.123 | 7.763  | 310.227 | 324.533 |
| 1091 | ENSG00000132141 | CCT6B    | 1.2  | 0.1131016 | 0.232853  | 3.042   | 0.225  | 2.793   | 3.231    | 2.656   | 0.165  | 2.503   | 2.831   |
| 1092 | ENSG00000156261 | CCT8     | -1.1 | 0.0014115 | 0.0077086 | 355.126 | 7.108  | 347.112 | 360.668  | 394.846 | 4.398  | 390.993 | 399.637 |
| 1093 | ENSG00000226015 | CCT8P1   | -1.1 | 0.0690269 | 0.1621012 | 20.167  | 0.135  | 20.048  | 20.314   | 23.264  | 1.402  | 22.208  | 24.855  |

|      | A               | B        | C    | D         | E         | F       | G      | H       | I       | J        | K      | L       | M        |
|------|-----------------|----------|------|-----------|-----------|---------|--------|---------|---------|----------|--------|---------|----------|
| 1095 | ENSG00000156535 | CD109    | 1.1  | 0.0790895 | 0.1799684 | 6.251   | 0.477  | 5.702   | 6.566   | 5.784    | 0.265  | 5.626   | 6.090    |
| 1097 | ENSG00000177697 | CD151    | 1.1  | 0.0388248 | 0.1044945 | 50.990  | 2.025  | 49.152  | 53.161  | 47.999   | 2.462  | 46.416  | 50.836   |
| 1098 | ENSG00000135535 | CD164    | 1.1  | 0.0004771 | 0.0032199 | 81.909  | 1.008  | 80.982  | 82.982  | 74.786   | 3.441  | 71.067  | 77.858   |
| 1099 | ENSG00000174950 | CD164L2  | -1.4 | 0.0230453 | 0.0704309 | 2.733   | 0.952  | 1.882   | 3.762   | 3.980    | 0.487  | 3.576   | 4.521    |
| 1100 | ENSG00000204936 | CD177    | -1.5 | 0.0226919 | 0.0696025 | 1.145   | 0.185  | 1.034   | 1.358   | 1.759    | 0.226  | 1.601   | 2.018    |
| 1101 | ENSG00000177455 | CD19     | -1.5 | 0.0191228 | 0.0608398 | 1.403   | 0.394  | 0.980   | 1.759   | 2.091    | 0.328  | 1.847   | 2.463    |
| 1102 | ENSG00000158473 | CD1D     | -1.2 | 0.1139206 | 0.2338844 | 3.834   | 0.282  | 3.571   | 4.131   | 4.736    | 0.609  | 4.165   | 5.377    |
| 1103 | ENSG00000174807 | CD248    | 2    | 1.871E-05 | 0.0002249 | 3.419   | 0.799  | 2.597   | 4.193   | 1.782    | 0.266  | 1.566   | 2.079    |
| 1105 | ENSG00000185275 | CD24P4   | -1.1 | 0.0998029 | 0.212939  | 930.647 | 83.315 | 835.542 | 990.756 | 1012.150 | 61.842 | 961.488 | 1081.065 |
| 1107 | ENSG00000167851 | CD300A   | -3.4 | 0.0009684 | 0.0057107 | 0.203   | 0.178  | 0.000   | 0.333   | 0.708    | 0.238  | 0.559   | 0.983    |
| 1108 | ENSG00000241399 | CD302    | 1.3  | 0.0506353 | 0.1282719 | 2.761   | 0.407  | 2.303   | 3.082   | 2.255    | 0.449  | 1.829   | 2.725    |
| 1109 | ENSG00000004468 | CD38     | 2.4  | 7.93E-05  | 0.0007484 | 0.670   | 0.040  | 0.630   | 0.711   | 0.289    | 0.110  | 0.205   | 0.414    |
| 1110 | ENSG00000117877 | CD3EAP   | 1.1  | 0.0148283 | 0.0499783 | 18.685  | 0.887  | 18.037  | 19.696  | 16.911   | 0.309  | 16.570  | 17.174   |
| 1111 | ENSG0000010610  | CD4      | -1.3 | 0.000758  | 0.0046597 | 5.647   | 0.610  | 5.187   | 6.339   | 7.538    | 0.922  | 6.709   | 8.531    |
| 1112 | ENSG00000196776 | CD47     | 1.1  | 0.0492231 | 0.1256051 | 13.277  | 0.529  | 12.698  | 13.735  | 12.347   | 1.086  | 11.589  | 13.592   |
| 1113 | ENSG00000143119 | CD53     | 1.9  | 0.0122401 | 0.0429325 | 1.424   | 0.072  | 1.349   | 1.492   | 0.761    | 0.449  | 0.481   | 1.278    |
| 1114 | ENSG00000085063 | CD59     | 1.1  | 0.0006146 | 0.0039586 | 53.478  | 2.423  | 51.535  | 56.193  | 48.394   | 0.409  | 48.020  | 48.831   |
| 1115 | ENSG00000135404 | CD63     | 1.4  | 8.34E-16  | 1.86E-13  | 313.582 | 8.876  | 305.100 | 322.805 | 224.691  | 5.033  | 221.713 | 230.501  |
| 1116 | ENSG00000137101 | CD72     | -1.2 | 0.0475206 | 0.1220897 | 3.602   | 0.396  | 3.183   | 3.971   | 4.502    | 0.614  | 3.899   | 5.126    |
| 1118 | ENSG0000019582  | CD74     | 1.1  | 0.004437  | 0.0192763 | 28.993  | 1.532  | 27.467  | 30.532  | 25.935   | 1.697  | 24.058  | 27.360   |
| 1119 | ENSG00000085117 | CD82     | -1.2 | 0.0387139 | 0.1042293 | 4.884   | 0.063  | 4.844   | 4.956   | 5.858    | 0.499  | 5.310   | 6.288    |
| 1120 | ENSG00000112149 | CD83     | 1.4  | 0.0012326 | 0.0069444 | 7.900   | 1.253  | 7.020   | 9.334   | 5.964    | 0.741  | 5.125   | 6.530    |
| 1121 | ENSG0000010278  | CD9      | 1.1  | 0.035457  | 0.097784  | 87.807  | 4.794  | 82.689  | 92.194  | 83.879   | 4.167  | 79.068  | 86.288   |
| 1122 | ENSG00000002586 | CD99     | 1.2  | 0.0003682 | 0.002611  | 40.230  | 1.519  | 39.197  | 41.974  | 34.495   | 0.917  | 33.438  | 35.089   |
| 1123 | ENSG00000223773 | CD99P1   | 1.1  | 0.0637413 | 0.1525912 | 5.321   | 0.474  | 4.866   | 5.812   | 4.739    | 0.372  | 4.425   | 5.151    |
| 1124 | ENSG00000158825 | CDA      | -1.6 | 7.828E-05 | 0.0007405 | 7.689   | 0.496  | 7.117   | 7.978   | 12.547   | 1.167  | 11.264  | 13.546   |
| 1125 | ENSG00000140326 | CDAN1    | -1.2 | 0.0002106 | 0.0016617 | 9.168   | 0.691  | 8.701   | 9.962   | 11.583   | 0.718  | 11.015  | 12.390   |
| 1126 | ENSG00000079335 | CDC14A   | 1.2  | 0.0005175 | 0.0034519 | 10.107  | 0.496  | 9.554   | 10.513  | 8.301    | 0.673  | 7.711   | 9.034    |
| 1127 | ENSG00000081377 | CDC14B   | 1.2  | 5.011E-05 | 0.0005139 | 21.902  | 0.148  | 21.743  | 22.036  | 19.411   | 0.840  | 18.824  | 20.373   |
| 1128 | ENSG00000218305 | CDC14C   | 1.3  | 0.0827062 | 0.1861639 | 4.518   | 0.298  | 4.232   | 4.828   | 3.665    | 0.561  | 3.200   | 4.288    |
| 1129 | ENSG00000130177 | CDC16    | 1.2  | 2.26E-08  | 7.585E-07 | 75.994  | 1.285  | 74.608  | 77.147  | 63.159   | 0.923  | 62.503  | 64.214   |
| 1130 | ENSG00000117399 | CDC20    | -1.4 | 6.13E-15  | 1.19E-12  | 204.061 | 9.872  | 193.834 | 213.534 | 299.842  | 11.664 | 287.001 | 309.781  |
| 1131 | ENSG00000231007 | CDC20P1  | -1.3 | 0.0012462 | 0.0070117 | 11.710  | 0.943  | 10.778  | 12.664  | 15.758   | 1.801  | 13.839  | 17.412   |
| 1132 | ENSG00000094880 | CDC23    | -1.1 | 0.0024396 | 0.0119114 | 51.254  | 0.534  | 50.651  | 51.667  | 58.136   | 2.122  | 55.690  | 59.484   |
| 1133 | ENSG00000101224 | CDC25B   | -1.2 | 8.558E-06 | 0.0001167 | 18.015  | 0.357  | 17.603  | 18.242  | 23.003   | 1.213  | 22.211  | 24.399   |
| 1134 | ENSG00000004897 | CDC27    | -1.1 | 0.0025216 | 0.0122658 | 37.798  | 1.822  | 36.123  | 39.738  | 42.839   | 2.484  | 40.293  | 45.256   |
| 1136 | ENSG00000099804 | CDC34    | -1.1 | 0.0031886 | 0.0147931 | 79.447  | 2.637  | 77.369  | 82.413  | 91.609   | 5.894  | 86.766  | 98.172   |
| 1137 | ENSG00000105401 | CDC37    | -1.1 | 0.0207357 | 0.0648968 | 104.155 | 5.322  | 98.428  | 108.949 | 114.462  | 3.812  | 110.614 | 118.238  |
| 1138 | ENSG00000168438 | CDC40    | -1.1 | 0.119022  | 0.2413982 | 22.349  | 0.720  | 21.749  | 23.147  | 24.394   | 1.559  | 22.950  | 26.046   |
| 1139 | ENSG00000143776 | CDC42BPA | 1.3  | 1.17E-09  | 5.561E-08 | 17.328  | 1.215  | 15.932  | 18.142  | 13.370   | 0.321  | 13.027  | 13.665   |
| 1140 | ENSG00000128283 | CDC42EP1 | 1.9  | 7.443E-10 | 3.814E-08 | 10.997  | 0.878  | 9.985   | 11.541  | 6.002    | 0.487  | 5.708   | 6.565    |
| 1141 | ENSG00000163171 | CDC42EP3 | 1.3  | 2.969E-07 | 6.956E-06 | 15.301  | 0.437  | 14.919  | 15.778  | 12.413   | 0.666  | 11.671  | 12.958   |

|      | A               | B        | C    | D         | E         | F       | G      | H       | I       | J       | K      | L       | M       |
|------|-----------------|----------|------|-----------|-----------|---------|--------|---------|---------|---------|--------|---------|---------|
| 1144 | ENSG00000179604 | CDC42EP4 | 1.2  | 0.0034989 | 0.0159378 | 12.208  | 1.054  | 11.205  | 13.307  | 10.536  | 0.483  | 10.120  | 11.066  |
| 1145 | ENSG00000167617 | CDC42EP5 | -1.3 | 0.0781055 | 0.1780801 | 6.511   | 1.888  | 4.417   | 8.084   | 8.762   | 1.345  | 7.567   | 10.219  |
| 1146 | ENSG00000197622 | CDC42SE1 | -1.1 | 0.0079541 | 0.0304657 | 50.228  | 1.985  | 47.956  | 51.632  | 56.038  | 1.137  | 55.285  | 57.346  |
| 1147 | ENSG00000158985 | CDC42SE2 | 1.1  | 0.0020327 | 0.010293  | 26.742  | 1.044  | 25.993  | 27.934  | 24.271  | 0.218  | 24.047  | 24.483  |
| 1148 | ENSG00000094804 | CDC6     | 1.1  | 0.0005617 | 0.0036794 | 42.856  | 2.095  | 40.689  | 44.870  | 38.946  | 0.694  | 38.430  | 39.735  |
| 1149 | ENSG00000184661 | CDCA2    | -1.1 | 0.0001976 | 0.0015813 | 41.692  | 0.224  | 41.434  | 41.823  | 48.700  | 1.636  | 47.184  | 50.433  |
| 1150 | ENSG00000111665 | CDCA3    | -1.3 | 1.855E-07 | 4.675E-06 | 15.405  | 0.514  | 14.812  | 15.707  | 20.266  | 0.672  | 19.588  | 20.931  |
| 1151 | ENSG00000170779 | CDCA4    | -1.1 | 0.1087549 | 0.2266074 | 49.870  | 1.598  | 48.412  | 51.579  | 54.176  | 2.510  | 51.416  | 56.324  |
| 1152 | ENSG00000146670 | CDCA5    | -1.2 | 5.098E-07 | 1.1E-05   | 45.967  | 0.830  | 45.253  | 46.878  | 58.241  | 4.067  | 53.771  | 61.723  |
| 1153 | ENSG00000144354 | CDCA7    | 1.1  | 0.0071174 | 0.0278778 | 71.815  | 1.836  | 69.739  | 73.222  | 66.995  | 3.509  | 63.039  | 69.732  |
| 1154 | ENSG00000164649 | CDCA7L   | -1   | 0.0842565 | 0.1887956 | 90.024  | 1.088  | 88.811  | 90.912  | 96.481  | 1.225  | 95.692  | 97.891  |
| 1155 | ENSG00000134690 | CDCA8    | -1.1 | 0.000744  | 0.004588  | 79.562  | 2.355  | 76.997  | 81.626  | 91.401  | 3.187  | 87.871  | 94.067  |
| 1156 | ENSG00000163814 | CDCP1    | 1.2  | 0.000458  | 0.0031186 | 10.501  | 0.438  | 10.097  | 10.966  | 8.927   | 0.290  | 8.725   | 9.260   |
| 1157 | ENSG00000039068 | CDH1     | -1.2 | 5.89E-07  | 1.236E-05 | 146.492 | 8.848  | 139.375 | 156.398 | 176.021 | 5.134  | 170.642 | 180.868 |
| 1158 | ENSG00000140937 | CDH11    | -1.4 | 0.0001829 | 0.0014865 | 1.332   | 0.053  | 1.292   | 1.392   | 1.881   | 0.099  | 1.788   | 1.985   |
| 1159 | ENSG00000139880 | CDH24    | -1.2 | 0.0053124 | 0.0221029 | 16.361  | 0.623  | 15.797  | 17.029  | 19.375  | 2.134  | 17.366  | 21.615  |
| 1160 | ENSG00000179242 | CDH4     | 1.2  | 0.0364719 | 0.0998299 | 5.305   | 0.799  | 4.824   | 6.226   | 4.684   | 0.360  | 4.268   | 4.893   |
| 1161 | ENSG00000113361 | CDH6     | 1.7  | 0.0059719 | 0.0242969 | 0.546   | 0.189  | 0.429   | 0.764   | 0.333   | 0.136  | 0.240   | 0.489   |
| 1162 | ENSG00000150394 | CDH8     | -1.1 | 0.0803009 | 0.1817381 | 2.337   | 0.248  | 2.175   | 2.622   | 2.715   | 0.259  | 2.445   | 2.961   |
| 1163 | ENSG00000148600 | CDHR1    | 1.3  | 0.0002041 | 0.0016189 | 7.026   | 0.443  | 6.519   | 7.339   | 5.731   | 0.586  | 5.107   | 6.270   |
| 1164 | ENSG00000089486 | CDIP1    | 1.1  | 0.0036556 | 0.0165094 | 51.251  | 1.204  | 49.950  | 52.326  | 47.116  | 1.785  | 45.163  | 48.664  |
| 1165 | ENSG00000170312 | CDK1     | -1.2 | 0.0001061 | 0.0009471 | 154.609 | 8.514  | 148.909 | 164.396 | 197.301 | 22.578 | 176.435 | 221.271 |
| 1166 | ENSG00000185324 | CDK10    | -1.1 | 0.0371764 | 0.1011363 | 16.714  | 0.714  | 16.034  | 17.458  | 18.685  | 1.225  | 17.497  | 19.944  |
| 1167 | ENSG00000248333 | CDK11B   | -1.1 | 0.0332653 | 0.0933958 | 44.880  | 0.959  | 43.812  | 45.666  | 49.510  | 1.353  | 47.967  | 50.494  |
| 1168 | ENSG00000167258 | CDK12    | -1.1 | 0.092084  | 0.201477  | 18.327  | 0.493  | 17.766  | 18.692  | 19.760  | 0.751  | 19.050  | 20.546  |
| 1169 | ENSG00000102225 | CDK16    | -1.1 | 0.0171987 | 0.0560357 | 63.334  | 2.971  | 59.904  | 65.061  | 70.118  | 3.989  | 67.788  | 74.723  |
| 1170 | ENSG00000059758 | CDK17    | 1.1  | 0.0073645 | 0.0286136 | 16.158  | 1.111  | 15.156  | 17.353  | 14.650  | 0.436  | 14.147  | 14.907  |
| 1171 | ENSG00000117266 | CDK18    | -1.1 | 0.0424852 | 0.1118892 | 18.246  | 0.919  | 17.313  | 19.149  | 20.326  | 1.772  | 19.211  | 22.369  |
| 1172 | ENSG00000155111 | CDK19    | -1.1 | 0.0354175 | 0.0977667 | 8.648   | 0.524  | 8.277   | 9.247   | 9.891   | 0.797  | 9.018   | 10.581  |
| 1173 | ENSG00000156345 | CDK20    | 1.2  | 0.0473134 | 0.1217421 | 2.587   | 0.145  | 2.425   | 2.706   | 2.170   | 0.287  | 1.925   | 2.485   |
| 1174 | ENSG00000135446 | CDK4     | 1.3  | 2.33E-11  | 1.784E-09 | 122.740 | 2.641  | 119.969 | 125.228 | 95.890  | 4.189  | 91.135  | 99.033  |
| 1175 | ENSG00000101391 | CDK5RAP1 | -1.1 | 0.0112246 | 0.039992  | 22.990  | 1.339  | 21.498  | 24.085  | 26.123  | 0.318  | 25.821  | 26.456  |
| 1176 | ENSG00000108465 | CDK5RAP3 | -1.1 | 0.0162786 | 0.0538261 | 27.978  | 0.495  | 27.406  | 28.276  | 31.213  | 1.711  | 29.502  | 32.924  |
| 1177 | ENSG00000105810 | CDK6     | 1.3  | 9.036E-08 | 2.497E-06 | 21.843  | 1.155  | 20.882  | 23.125  | 17.771  | 1.087  | 16.898  | 18.989  |
| 1178 | ENSG00000134058 | CDK7     | -1.1 | 0.0085024 | 0.0320127 | 63.567  | 1.461  | 62.036  | 64.946  | 71.710  | 4.498  | 66.677  | 75.336  |
| 1179 | ENSG00000132964 | CDK8     | -1.1 | 0.007376  | 0.0286321 | 34.484  | 0.493  | 33.969  | 34.951  | 39.173  | 0.587  | 38.538  | 39.697  |
| 1180 | ENSG00000136807 | CDK9     | -1.2 | 3.183E-06 | 5.018E-05 | 36.629  | 3.230  | 34.664  | 40.356  | 46.373  | 1.305  | 45.347  | 47.841  |
| 1181 | ENSG00000145996 | CDKAL1   | -1.1 | 0.0303171 | 0.0869809 | 13.632  | 0.307  | 13.443  | 13.986  | 15.585  | 1.008  | 14.443  | 16.355  |
| 1182 | ENSG00000008086 | CDKL5    | -1.1 | 0.0823988 | 0.1857157 | 6.443   | 0.042  | 6.399   | 6.483   | 7.054   | 0.083  | 6.959   | 7.112   |
| 1183 | ENSG00000124762 | CDKN1A   | -1.3 | 0.0721109 | 0.167598  | 121.037 | 19.200 | 109.231 | 143.191 | 159.626 | 38.986 | 117.366 | 194.191 |
| 1184 | ENSG00000129757 | CDKN1C   | -1.3 | 5.118E-05 | 0.0005215 | 20.199  | 0.372  | 19.934  | 20.624  | 26.962  | 2.199  | 24.652  | 29.030  |

|      | A               | B              | C    | D         | E         | F       | G     | H       | I       | J       | K     | L       | M       |
|------|-----------------|----------------|------|-----------|-----------|---------|-------|---------|---------|---------|-------|---------|---------|
| 1185 | ENSG00000237190 | CDKN2AIP<br>NL | -1.1 | 0.0580551 | 0.1421712 | 52.353  | 2.957 | 49.421  | 55.335  | 58.336  | 2.398 | 56.613  | 61.075  |
| 1186 | ENSG00000147883 | CDKN2B         | 3.9  | 0.000518  | 0.0034531 | 0.365   | 0.036 | 0.328   | 0.400   | 0.091   | 0.058 | 0.041   | 0.154   |
| 1187 | ENSG00000129355 | CDKN2D         | 2    | 0.0014264 | 0.0077698 | 2.167   | 0.443 | 1.784   | 2.652   | 1.094   | 0.227 | 0.930   | 1.353   |
| 1188 | ENSG00000100526 | CDKN3          | 1.2  | 0.0002481 | 0.0018977 | 68.963  | 5.102 | 63.943  | 74.144  | 59.513  | 3.224 | 55.966  | 62.264  |
| 1189 | ENSG00000129596 | CDO1           | -1.1 | 0.0283453 | 0.0826364 | 24.906  | 1.569 | 23.337  | 26.476  | 29.079  | 1.364 | 28.208  | 30.651  |
| 1190 | ENSG00000064309 | CDON           | -1.2 | 2.416E-05 | 0.000279  | 7.120   | 0.507 | 6.606   | 7.619   | 9.032   | 0.438 | 8.527   | 9.289   |
| 1191 | ENSG00000140743 | CDR2           | -1.1 | 0.0016449 | 0.0087346 | 26.791  | 0.975 | 25.680  | 27.505  | 31.309  | 1.109 | 30.197  | 32.415  |
| 1192 | ENSG00000109089 | CDR2L          | -1.1 | 0.0170164 | 0.0556347 | 17.778  | 1.096 | 16.796  | 18.960  | 20.443  | 0.970 | 19.587  | 21.496  |
| 1193 | ENSG00000163624 | CDS1           | 1.1  | 0.0559661 | 0.1383353 | 14.226  | 1.216 | 13.503  | 15.630  | 13.187  | 0.788 | 12.672  | 14.094  |
| 1194 | ENSG00000101290 | CDS2           | 1.1  | 0.0025731 | 0.0124519 | 25.857  | 0.914 | 24.804  | 26.447  | 24.015  | 0.554 | 23.378  | 24.379  |
| 1196 | ENSG00000167513 | CDT1           | -1.2 | 8.397E-06 | 0.0001149 | 40.982  | 3.369 | 37.796  | 44.508  | 51.224  | 1.355 | 50.026  | 52.696  |
| 1197 | ENSG00000131264 | CDX4           | 1.5  | 0.0002309 | 0.0017927 | 11.047  | 0.478 | 10.727  | 11.597  | 7.562   | 1.109 | 6.710   | 8.816   |
| 1198 | ENSG00000153046 | CDYL           | -1.2 | 6.808E-06 | 9.605E-05 | 77.480  | 2.238 | 74.936  | 79.150  | 91.667  | 2.055 | 89.539  | 93.639  |
| 1199 | ENSG00000166446 | CDYL2          | 1.4  | 0.0022605 | 0.0111764 | 1.939   | 0.210 | 1.778   | 2.176   | 1.469   | 0.167 | 1.289   | 1.619   |
| 1200 | ENSG00000224039 | CDYLP1         | -4.8 | 9.133E-07 | 1.775E-05 | 0.576   | 0.255 | 0.304   | 0.810   | 2.866   | 0.839 | 2.360   | 3.835   |
| 1201 | ENSG00000079385 | CEACAM1        | 1.4  | 0.0036515 | 0.0164995 | 2.159   | 0.128 | 2.019   | 2.272   | 1.582   | 0.180 | 1.434   | 1.782   |
| 1202 | ENSG00000172216 | CEBPB          | 1.5  | 0.001417  | 0.007731  | 18.275  | 0.674 | 17.599  | 18.946  | 12.867  | 3.896 | 8.734   | 16.471  |
| 1203 | ENSG00000221869 | CEBPD          | 1.4  | 0.0725784 | 0.1684071 | 3.267   | 0.854 | 2.645   | 4.241   | 2.466   | 0.441 | 1.997   | 2.872   |
| 1204 | ENSG00000153879 | CEBPG          | 1.4  | 5.68E-13  | 6.40E-11  | 56.681  | 0.772 | 56.202  | 57.572  | 41.638  | 1.089 | 40.383  | 42.337  |
| 1205 | ENSG00000115816 | CEBPZ          | 1.3  | 2.46E-11  | 1.862E-09 | 173.469 | 6.687 | 165.871 | 178.462 | 137.083 | 4.566 | 133.646 | 142.263 |
| 1206 | ENSG00000218739 | CEBPZOS        | -1.2 | 3.778E-05 | 0.0004051 | 99.891  | 3.499 | 95.852  | 102.013 | 117.564 | 3.484 | 115.318 | 121.577 |
| 1207 | ENSG00000099954 | CECR2          | -1.1 | 0.0002879 | 0.0021407 | 45.848  | 3.076 | 42.445  | 48.432  | 52.512  | 0.987 | 51.374  | 53.117  |
| 1208 | ENSG00000183307 | CECR6          | 1.2  | 0.0347258 | 0.0963765 | 8.225   | 1.267 | 6.932   | 9.464   | 7.302   | 0.250 | 7.138   | 7.590   |
| 1210 | ENSG00000149187 | CELF1          | -1.1 | 7.41E-05  | 0.0007081 | 74.250  | 1.407 | 72.745  | 75.532  | 85.843  | 3.694 | 81.688  | 88.758  |
| 1211 | ENSG00000048740 | CELF2          | 1.4  | 1.319E-07 | 3.464E-06 | 14.063  | 1.512 | 12.391  | 15.332  | 10.556  | 0.293 | 10.231  | 10.799  |
| 1212 | ENSG00000161082 | CELF5          | -1.2 | 0.002953  | 0.0138965 | 5.681   | 0.811 | 4.779   | 6.352   | 7.200   | 0.883 | 6.233   | 7.966   |
| 1213 | ENSG00000075275 | CELSR1         | 1.2  | 0.0007131 | 0.0044322 | 9.290   | 1.237 | 7.863   | 10.040  | 7.869   | 0.358 | 7.506   | 8.222   |
| 1214 | ENSG00000008300 | CELSR3         | -1.1 | 0.0649486 | 0.1546495 | 11.834  | 0.922 | 10.834  | 12.652  | 13.062  | 0.970 | 12.499  | 14.182  |
| 1215 | ENSG00000184524 | CEND1          | -1.9 | 0.0071621 | 0.0280271 | 1.047   | 0.222 | 0.813   | 1.254   | 2.047   | 0.575 | 1.417   | 2.543   |
| 1216 | ENSG00000115163 | CENPA          | -1.1 | 0.0733025 | 0.1697379 | 39.379  | 4.795 | 36.213  | 44.897  | 44.810  | 5.690 | 38.296  | 48.812  |
| 1217 | ENSG00000145241 | CENPC          | -1.1 | 0.0091514 | 0.0338608 | 15.597  | 0.522 | 15.136  | 16.165  | 17.983  | 2.061 | 15.696  | 19.696  |
| 1218 | ENSG00000138778 | CENPE          | -1.3 | 0.0408797 | 0.1086767 | 28.197  | 3.597 | 25.667  | 32.315  | 37.224  | 2.872 | 33.908  | 38.912  |
| 1219 | ENSG00000117724 | CENPF          | -1.2 | 0.0041684 | 0.0183575 | 120.497 | 8.390 | 115.121 | 130.165 | 143.735 | 6.391 | 138.574 | 150.883 |
| 1220 | ENSG00000102384 | CENPI          | 1.2  | 0.0001271 | 0.0011006 | 17.549  | 0.632 | 16.895  | 18.155  | 14.913  | 0.753 | 14.053  | 15.449  |
| 1221 | ENSG00000123219 | CENPK          | 1.2  | 0.0005076 | 0.003399  | 28.252  | 0.803 | 27.461  | 29.066  | 24.516  | 1.430 | 23.590  | 26.163  |
| 1222 | ENSG00000120334 | CENPL          | -1.2 | 0.0070215 | 0.0275725 | 8.861   | 0.847 | 8.238   | 9.825   | 10.688  | 0.715 | 10.248  | 11.513  |
| 1223 | ENSG00000100162 | CENPM          | 1.1  | 0.1110579 | 0.2300153 | 24.275  | 1.560 | 23.168  | 26.060  | 22.630  | 0.913 | 21.964  | 23.671  |
| 1224 | ENSG00000166451 | CENPN          | 1.1  | 0.00662   | 0.0263358 | 34.702  | 1.144 | 33.405  | 35.569  | 31.808  | 1.419 | 30.683  | 33.401  |
| 1225 | ENSG00000188312 | CENPP          | 1.2  | 0.0094887 | 0.0349103 | 4.048   | 0.439 | 3.663   | 4.525   | 3.441   | 0.152 | 3.289   | 3.593   |
| 1226 | ENSG00000102901 | CENPT          | -1.1 | 0.0054384 | 0.0225387 | 14.735  | 0.491 | 14.217  | 15.194  | 17.260  | 1.125 | 16.240  | 18.466  |
| 1227 | ENSG00000151725 | CENPU          | 1.1  | 0.0025266 | 0.0122793 | 73.191  | 2.886 | 70.381  | 76.147  | 66.366  | 4.811 | 62.602  | 71.786  |

|      | A               | B              | C    | D         | E         | F       | G     | H       | I       | J       | K     | L       | M       |
|------|-----------------|----------------|------|-----------|-----------|---------|-------|---------|---------|---------|-------|---------|---------|
| 1228 | ENSG00000223591 | CENPVL1        | 1.4  | 0.0472029 | 0.1215763 | 3.115   | 0.515 | 2.522   | 3.450   | 2.309   | 0.323 | 1.949   | 2.575   |
| 1229 | ENSG00000283093 | CENPVL2        | 1.4  | 0.0497511 | 0.1264786 | 3.016   | 0.534 | 2.407   | 3.404   | 2.228   | 0.331 | 1.872   | 2.527   |
| 1230 | ENSG00000203760 | CENPW          | 1.1  | 0.0313915 | 0.0894114 | 121.091 | 4.251 | 116.190 | 123.767 | 112.268 | 3.267 | 110.208 | 116.035 |
| 1231 | ENSG00000169689 | CENPX          | -1.1 | 0.0141035 | 0.0480607 | 43.505  | 1.284 | 42.073  | 44.554  | 50.055  | 2.225 | 47.853  | 52.303  |
| 1232 | ENSG00000116198 | CEP104         | -1.1 | 0.0518119 | 0.1304982 | 9.578   | 0.241 | 9.307   | 9.767   | 10.674  | 0.682 | 10.213  | 11.458  |
| 1233 | ENSG00000154240 | CEP112         | -1.2 | 0.0312524 | 0.0890751 | 2.491   | 0.059 | 2.447   | 2.558   | 3.050   | 0.331 | 2.670   | 3.274   |
| 1234 | ENSG00000168944 | CEP120         | 1.2  | 2.012E-05 | 0.0002385 | 20.294  | 1.129 | 19.014  | 21.147  | 17.108  | 0.420 | 16.629  | 17.413  |
| 1235 | ENSG00000110318 | CEP126         | 1.2  | 0.0640317 | 0.153113  | 1.598   | 0.105 | 1.478   | 1.673   | 1.363   | 0.057 | 1.298   | 1.406   |
| 1236 | ENSG00000141577 | CEP131         | -1.3 | 0.0001241 | 0.0010788 | 11.490  | 0.464 | 11.195  | 12.025  | 14.967  | 0.843 | 14.097  | 15.780  |
| 1237 | ENSG00000103995 | CEP152         | -1.2 | 8.825E-05 | 0.000816  | 9.086   | 0.287 | 8.785   | 9.357   | 11.312  | 0.595 | 10.895  | 11.993  |
| 1238 | ENSG00000143702 | CEP170         | -1   | 0.1053125 | 0.221206  | 32.060  | 0.742 | 31.483  | 32.897  | 34.405  | 0.927 | 33.578  | 35.407  |
| 1240 | ENSG00000099814 | CEP170B        | -1.1 | 0.0382954 | 0.1033658 | 17.810  | 0.661 | 17.405  | 18.573  | 19.974  | 1.696 | 18.229  | 21.616  |
| 1241 | ENSG00000101639 | CEP192         | -1.1 | 0.0122478 | 0.0429498 | 18.768  | 0.708 | 17.952  | 19.222  | 20.974  | 0.467 | 20.642  | 21.508  |
| 1242 | ENSG00000198707 | CEP290         | 1.1  | 0.0069858 | 0.0274769 | 10.537  | 0.092 | 10.441  | 10.624  | 9.521   | 0.173 | 9.403   | 9.720   |
| 1244 | ENSG00000135837 | CEP350         | -1.1 | 0.0736209 | 0.1701731 | 14.831  | 0.583 | 14.370  | 15.486  | 16.111  | 0.325 | 15.735  | 16.306  |
| 1246 | ENSG00000106477 | CEP41          | 1.1  | 0.0358636 | 0.0986116 | 2.727   | 0.122 | 2.645   | 2.867   | 2.443   | 0.098 | 2.340   | 2.534   |
| 1247 | ENSG00000166037 | CEP57          | -1.2 | 2.012E-05 | 0.0002385 | 38.642  | 0.814 | 37.703  | 39.114  | 46.108  | 1.337 | 44.943  | 47.568  |
| 1248 | ENSG00000112877 | CEP72          | -1.1 | 0.099465  | 0.2124859 | 9.327   | 0.526 | 8.724   | 9.687   | 10.552  | 0.776 | 9.718   | 11.251  |
| 1250 | ENSG00000101624 | CEP76          | -1.2 | 0.0006782 | 0.0042687 | 6.589   | 0.468 | 6.145   | 7.077   | 8.288   | 0.495 | 7.717   | 8.584   |
| 1251 | ENSG00000148019 | CEP78          | 1.1  | 0.0018569 | 0.0095835 | 16.122  | 0.302 | 15.906  | 16.467  | 14.652  | 0.504 | 14.302  | 15.230  |
| 1252 | ENSG00000173588 | CEP83          | 1.1  | 0.0472274 | 0.1215763 | 12.136  | 0.614 | 11.428  | 12.521  | 11.110  | 0.479 | 10.570  | 11.482  |
| 1253 | ENSG00000278916 | CEP83-<br>AS1  | -1.3 | 0.0699414 | 0.1637259 | 2.346   | 0.603 | 1.905   | 3.034   | 3.180   | 0.372 | 2.824   | 3.567   |
| 1254 | ENSG00000121289 | CEP89          | -1.1 | 0.1112814 | 0.2303063 | 6.348   | 0.306 | 6.077   | 6.680   | 7.017   | 0.175 | 6.843   | 7.194   |
| 1255 | ENSG00000134255 | CEPT1          | 1.1  | 0.0023939 | 0.0117288 | 13.315  | 0.417 | 12.857  | 13.671  | 11.952  | 0.261 | 11.666  | 12.180  |
| 1256 | ENSG00000147869 | CER1           | 3.7  | 0.0014269 | 0.0077699 | 1.139   | 0.463 | 0.608   | 1.459   | 0.303   | 0.295 | 0.128   | 0.644   |
| 1258 | ENSG00000167123 | CERCAM         | 1.3  | 0.0025486 | 0.0123509 | 4.858   | 0.355 | 4.459   | 5.139   | 3.890   | 0.313 | 3.581   | 4.207   |
| 1259 | ENSG00000100422 | CERK           | -1.1 | 0.0003186 | 0.0023186 | 38.547  | 2.455 | 36.055  | 40.963  | 44.906  | 1.036 | 43.935  | 45.997  |
| 1260 | ENSG00000090661 | CERS4          | 1.2  | 2.837E-06 | 4.557E-05 | 38.999  | 0.323 | 38.666  | 39.311  | 32.723  | 1.873 | 30.590  | 34.100  |
| 1261 | ENSG00000139624 | CERS5          | 1.3  | 9.308E-07 | 1.8E-05   | 16.658  | 0.618 | 16.035  | 17.272  | 13.498  | 0.146 | 13.358  | 13.650  |
| 1262 | ENSG00000172292 | CERS6          | 1.1  | 0.0061743 | 0.0249226 | 23.699  | 0.802 | 22.777  | 24.239  | 21.816  | 0.836 | 21.040  | 22.702  |
| 1264 | ENSG00000172831 | CES2           | 1.2  | 0.0010262 | 0.0060015 | 11.443  | 1.005 | 10.369  | 12.362  | 9.616   | 0.648 | 8.943   | 10.236  |
| 1265 | ENSG00000147400 | CETN2          | 1.1  | 0.0056947 | 0.0234229 | 45.227  | 4.239 | 40.817  | 49.272  | 40.259  | 2.714 | 37.964  | 43.255  |
| 1266 | ENSG00000153140 | CETN3          | 1.1  | 0.0797897 | 0.1809201 | 62.503  | 2.123 | 60.456  | 64.696  | 59.986  | 3.126 | 56.900  | 63.150  |
| 1267 | ENSG00000070761 | CFAP20         | 1.1  | 0.0089466 | 0.0332777 | 40.396  | 0.995 | 39.413  | 41.402  | 36.823  | 1.381 | 35.758  | 38.383  |
| 1268 | ENSG00000231233 | CFAP58-<br>AS1 | 1.6  | 0.0639151 | 0.152899  | 2.983   | 1.296 | 1.487   | 3.748   | 1.854   | 0.856 | 1.050   | 2.754   |
| 1269 | ENSG00000105792 | CFAP69         | -1.2 | 0.0643552 | 0.153626  | 1.481   | 0.073 | 1.438   | 1.565   | 1.782   | 0.107 | 1.662   | 1.869   |
| 1270 | ENSG00000153774 | CFDP1          | 1.3  | 1.88E-09  | 8.662E-08 | 78.615  | 4.970 | 72.954  | 82.266  | 61.413  | 1.395 | 60.494  | 63.019  |
| 1271 | ENSG00000172757 | CFL1           | -1   | 0.1081229 | 0.2256797 | 204.130 | 6.372 | 197.204 | 209.743 | 217.516 | 6.811 | 210.267 | 223.782 |
| 1272 | ENSG00000165410 | CFL2           | -1.1 | 0.0268682 | 0.0791393 | 10.027  | 0.149 | 9.858   | 10.139  | 11.435  | 0.736 | 10.686  | 12.158  |
| 1273 | ENSG00000001626 | CFTR           | 2.3  | 8.267E-07 | 1.624E-05 | 1.666   | 0.431 | 1.326   | 2.151   | 0.734   | 0.059 | 0.666   | 0.771   |
| 1274 | ENSG00000163320 | CGGBP1         | -1.1 | 0.0812184 | 0.1834463 | 67.347  | 0.992 | 66.205  | 67.998  | 72.335  | 2.432 | 70.256  | 75.009  |

|      | A               | B        | C    | D         | E         | F       | G      | H       | I       | J       | K      | L       | M       |
|------|-----------------|----------|------|-----------|-----------|---------|--------|---------|---------|---------|--------|---------|---------|
| 1275 | ENSG00000143375 | CGN      | -1.2 | 1.183E-08 | 4.312E-07 | 52.497  | 1.071  | 51.321  | 53.415  | 65.949  | 0.887  | 65.138  | 66.896  |
| 1277 | ENSG00000128849 | CGNL1    | -1.2 | 1.311E-06 | 2.385E-05 | 55.887  | 3.362  | 52.050  | 58.318  | 67.446  | 2.002  | 65.770  | 69.663  |
| 1278 | ENSG00000138028 | CGREF1   | 1.6  | 0.0001878 | 0.001518  | 3.364   | 0.729  | 2.926   | 4.205   | 2.149   | 0.214  | 2.014   | 2.396   |
| 1279 | ENSG00000138135 | CH25H    | 7.9  | 0.0032482 | 0.0150103 | 0.322   | 0.052  | 0.263   | 0.353   | 0.031   | 0.054  | 0.000   | 0.093   |
| 1280 | ENSG00000128965 | CHAC1    | 2.6  | 1.06E-18  | 5.29E-16  | 33.974  | 0.869  | 33.166  | 34.893  | 13.095  | 1.655  | 11.191  | 14.187  |
| 1281 | ENSG00000167670 | CHAF1A   | 1.1  | 0.0006415 | 0.0040945 | 55.552  | 0.694  | 54.985  | 56.326  | 50.352  | 3.564  | 46.390  | 53.297  |
| 1283 | ENSG00000159259 | CHAF1B   | 1.1  | 0.0293096 | 0.0847051 | 18.622  | 1.065  | 17.482  | 19.591  | 16.982  | 2.464  | 14.233  | 18.992  |
| 1284 | ENSG00000198824 | CHAMP1   | 1.2  | 1.17E-05  | 0.0001524 | 31.664  | 1.057  | 30.902  | 32.870  | 26.773  | 0.826  | 25.840  | 27.408  |
| 1285 | ENSG00000106153 | CHCHD2   | -1.1 | 0.0135556 | 0.0465608 | 93.988  | 4.409  | 88.952  | 97.152  | 107.742 | 12.615 | 93.272  | 116.429 |
| 1286 | ENSG00000215006 | CHCHD2P2 | -1.3 | 0.0329703 | 0.0928449 | 15.787  | 1.090  | 14.773  | 16.940  | 21.824  | 2.617  | 19.572  | 24.695  |
| 1287 | ENSG00000125611 | CHCHD5   | -1.1 | 0.0793035 | 0.1801812 | 5.267   | 0.400  | 4.910   | 5.699   | 6.170   | 0.603  | 5.784   | 6.865   |
| 1289 | ENSG00000153922 | CHD1     | -1.1 | 0.0604458 | 0.1465252 | 30.229  | 1.393  | 28.621  | 31.065  | 32.749  | 0.490  | 32.188  | 33.087  |
| 1290 | ENSG00000131778 | CHD1L    | 1.1  | 0.0003078 | 0.0022565 | 95.341  | 1.129  | 94.071  | 96.232  | 87.050  | 1.560  | 85.658  | 88.736  |
| 1291 | ENSG00000111642 | CHD4     | 1.1  | 0.040984  | 0.1089021 | 208.744 | 11.469 | 195.530 | 216.114 | 201.972 | 8.172  | 193.235 | 209.428 |
| 1292 | ENSG00000100888 | CHD8     | -1.1 | 0.0020019 | 0.0101828 | 44.296  | 1.035  | 43.139  | 45.134  | 49.558  | 1.493  | 48.491  | 51.264  |
| 1293 | ENSG00000177200 | CHD9     | -1.1 | 0.0443031 | 0.1157724 | 12.752  | 0.293  | 12.444  | 13.027  | 13.918  | 0.348  | 13.714  | 14.320  |
| 1294 | ENSG0000016391  | CHDH     | -1.1 | 0.0927571 | 0.2024992 | 7.672   | 0.433  | 7.384   | 8.170   | 8.554   | 0.650  | 7.807   | 8.991   |
| 1295 | ENSG00000149554 | CHEK1    | -1.1 | 0.0312645 | 0.0890945 | 43.747  | 1.535  | 42.438  | 45.436  | 47.733  | 0.667  | 46.977  | 48.238  |
| 1296 | ENSG00000085872 | CHERP    | -1.2 | 0.0005396 | 0.0035592 | 22.016  | 1.056  | 21.278  | 23.226  | 26.273  | 1.929  | 24.363  | 28.220  |
| 1297 | ENSG00000072609 | CHFR     | 1.2  | 2.913E-05 | 0.0003254 | 7.141   | 0.637  | 6.420   | 7.625   | 5.975   | 0.205  | 5.830   | 6.210   |
| 1298 | ENSG00000100604 | CHGA     | -1.1 | 0.0045106 | 0.0195359 | 32.267  | 2.097  | 29.862  | 33.716  | 37.323  | 1.461  | 36.196  | 38.974  |
| 1299 | ENSG00000204116 | CHIC1    | 1.1  | 0.1146034 | 0.2349154 | 12.661  | 0.256  | 12.367  | 12.839  | 11.911  | 0.765  | 11.089  | 12.602  |
| 1300 | ENSG00000110721 | CHKA     | 1.2  | 0.0002669 | 0.0020153 | 46.486  | 3.464  | 43.270  | 50.154  | 41.000  | 1.920  | 39.300  | 43.083  |
| 1301 | ENSG00000203668 | CHML     | -1.1 | 0.0022761 | 0.0112462 | 49.172  | 0.562  | 48.715  | 49.800  | 56.371  | 1.590  | 54.632  | 57.749  |
| 1302 | ENSG00000278530 | CHMP1B2P | 1.3  | 0.0061489 | 0.024844  | 2.838   | 0.171  | 2.661   | 3.003   | 2.270   | 0.164  | 2.094   | 2.419   |
| 1303 | ENSG00000083937 | CHMP2B   | 1.2  | 7.013E-08 | 1.987E-06 | 105.845 | 2.912  | 103.177 | 108.951 | 87.889  | 3.245  | 85.650  | 91.610  |
| 1304 | ENSG00000115561 | CHMP3    | 1.3  | 0.0003456 | 0.0024778 | 6.465   | 0.236  | 6.305   | 6.736   | 5.270   | 0.305  | 5.065   | 5.621   |
| 1305 | ENSG00000101421 | CHMP4B   | 1.1  | 0.0118156 | 0.041685  | 119.027 | 2.107  | 116.654 | 120.678 | 112.046 | 2.293  | 109.460 | 113.833 |
| 1306 | ENSG00000164695 | CHMP4C   | 2.1  | 3.51E-11  | 2.58E-09  | 13.470  | 0.594  | 12.985  | 14.132  | 6.545   | 0.141  | 6.439   | 6.705   |
| 1307 | ENSG00000176108 | CHMP6    | 1.2  | 0.0355212 | 0.0979251 | 14.972  | 1.840  | 13.802  | 17.093  | 13.027  | 1.595  | 11.741  | 14.811  |
| 1308 | ENSG00000147457 | CHMP7    | -1.2 | 5.812E-05 | 0.0005799 | 26.161  | 0.832  | 25.582  | 27.114  | 31.799  | 2.055  | 29.453  | 33.285  |
| 1309 | ENSG00000106069 | CHN2     | 1.3  | 0.0066209 | 0.0263358 | 1.403   | 0.185  | 1.202   | 1.565   | 1.074   | 0.112  | 0.954   | 1.174   |
| 1310 | ENSG00000166869 | CHP2     | -1.2 | 0.004245  | 0.0186048 | 11.547  | 0.516  | 11.164  | 12.134  | 14.427  | 0.156  | 14.314  | 14.604  |
| 1312 | ENSG00000033100 | CHPF2    | -1.3 | 0.0001803 | 0.0014704 | 8.549   | 0.283  | 8.257   | 8.822   | 11.018  | 0.549  | 10.517  | 11.604  |
| 1313 | ENSG00000111666 | CHPT1    | 1.2  | 0.0041959 | 0.0184357 | 12.640  | 0.320  | 12.296  | 12.928  | 11.227  | 0.753  | 10.450  | 11.952  |
| 1314 | ENSG00000090539 | CHRD     | -1.6 | 0.0161696 | 0.0535914 | 0.508   | 0.130  | 0.402   | 0.653   | 0.825   | 0.186  | 0.704   | 1.040   |
| 1315 | ENSG00000101204 | CHRNA4   | -3.1 | 6.906E-08 | 1.966E-06 | 0.224   | 0.057  | 0.160   | 0.270   | 0.717   | 0.179  | 0.534   | 0.892   |
| 1316 | ENSG00000169684 | CHRNA5   | 1.2  | 0.0127609 | 0.0443082 | 11.858  | 0.846  | 10.929  | 12.583  | 10.384  | 1.046  | 9.213   | 11.224  |
| 1317 | ENSG00000174343 | CHRNA9   | 1.7  | 6.67E-05  | 0.0006495 | 3.101   | 0.162  | 2.938   | 3.262   | 1.889   | 0.262  | 1.633   | 2.157   |
| 1318 | ENSG00000171310 | CHST11   | -1.3 | 3.129E-05 | 0.0003456 | 5.203   | 0.325  | 4.912   | 5.554   | 7.014   | 0.442  | 6.684   | 7.516   |

|      | A               | B         | C    | D         | E         | F        | G      | H        | I        | J        | K      | L        | M        |
|------|-----------------|-----------|------|-----------|-----------|----------|--------|----------|----------|----------|--------|----------|----------|
| 1319 | ENSG00000136213 | CHST12    | -1.2 | 0.0046828 | 0.0201167 | 1.780    | 0.052  | 1.744    | 1.840    | 2.205    | 0.256  | 2.037    | 2.500    |
| 1320 | ENSG00000169105 | CHST14    | 1.1  | 0.0344942 | 0.0958751 | 16.593   | 0.812  | 15.657   | 17.114   | 15.070   | 0.473  | 14.644   | 15.579   |
| 1321 | ENSG00000124302 | CHST8     | -1.3 | 0.0015844 | 0.0084617 | 6.325    | 0.032  | 6.289    | 6.346    | 8.471    | 0.893  | 7.785    | 9.480    |
| 1322 | ENSG00000154080 | CHST9     | -1.2 | 0.0251139 | 0.0752036 | 3.479    | 0.394  | 3.168    | 3.921    | 4.129    | 0.571  | 3.478    | 4.548    |
| 1323 | ENSG00000131873 | CHSY1     | -1.1 | 0.0012731 | 0.0071228 | 31.834   | 0.977  | 30.709   | 32.473   | 37.065   | 2.936  | 34.247   | 40.107   |
| 1324 | ENSG00000127586 | CHTF18    | -1.2 | 1.328E-05 | 0.0001698 | 22.144   | 0.276  | 21.968   | 22.461   | 27.703   | 1.619  | 25.840   | 28.771   |
| 1325 | ENSG00000144021 | CIAO1     | -1.1 | 0.0111555 | 0.0397877 | 42.968   | 1.111  | 41.745   | 43.916   | 47.900   | 1.455  | 46.694   | 49.515   |
| 1326 | ENSG00000159208 | CIART     | 1.2  | 0.0436749 | 0.1144588 | 7.726    | 0.682  | 7.018    | 8.379    | 6.687    | 0.504  | 6.106    | 6.995    |
| 1327 | ENSG00000136305 | CIDEB     | 1.2  | 0.0287108 | 0.0834054 | 8.154    | 0.617  | 7.525    | 8.758    | 7.013    | 0.560  | 6.419    | 7.531    |
| 1330 | ENSG00000160161 | CILP2     | -1.3 | 0.0018138 | 0.0094189 | 6.524    | 0.322  | 6.231    | 6.868    | 8.356    | 0.723  | 7.729    | 9.147    |
| 1331 | ENSG00000138433 | CIR1      | -1.1 | 0.0845284 | 0.189216  | 23.235   | 0.300  | 22.903   | 23.486   | 26.026   | 2.661  | 23.870   | 29.000   |
| 1332 | ENSG00000099622 | CIRBP     | -1   | 0.112422  | 0.2318489 | 77.790   | 2.639  | 75.401   | 80.622   | 83.226   | 2.724  | 80.823   | 86.185   |
| 1333 | ENSG00000122873 | CISD1     | 1.1  | 0.0733192 | 0.1697507 | 27.805   | 1.143  | 27.002   | 29.114   | 26.081   | 1.592  | 24.243   | 27.043   |
| 1334 | ENSG00000145354 | CISD2     | 1.3  | 7.864E-07 | 1.561E-05 | 35.248   | 1.113  | 34.046   | 36.241   | 27.283   | 1.823  | 25.409   | 29.051   |
| 1335 | ENSG00000122966 | CIT       | -1.1 | 0.0213438 | 0.0663366 | 21.460   | 0.568  | 20.902   | 22.038   | 23.604   | 1.255  | 22.350   | 24.861   |
| 1336 | ENSG00000164442 | CITED2    | -1.3 | 6.607E-07 | 1.353E-05 | 41.947   | 3.899  | 39.663   | 46.449   | 55.191   | 3.567  | 51.218   | 58.117   |
| 1338 | ENSG00000179862 | CITED4    | -1.2 | 0.0530212 | 0.1329303 | 9.869    | 0.613  | 9.318    | 10.529   | 12.505   | 3.797  | 10.018   | 16.876   |
| 1339 | ENSG00000136108 | CKAP2     | -1.1 | 0.0498909 | 0.1267525 | 92.633   | 4.032  | 88.670   | 96.731   | 100.850  | 5.386  | 96.756   | 106.952  |
| 1340 | ENSG00000169607 | CKAP2L    | -1.3 | 1.603E-06 | 2.807E-05 | 26.021   | 2.504  | 24.543   | 28.912   | 35.468   | 3.921  | 31.929   | 39.683   |
| 1341 | ENSG00000175216 | CKAP5     | -1.2 | 5.767E-09 | 2.328E-07 | 183.079  | 4.782  | 177.794  | 187.107  | 226.000  | 10.007 | 218.234  | 237.293  |
| 1342 | ENSG00000166165 | CKB       | -1.1 | 0.0169768 | 0.0555483 | 172.545  | 5.481  | 166.453  | 177.077  | 191.922  | 8.674  | 184.270  | 201.344  |
| 1343 | ENSG00000223572 | CKMT1A    | -1.1 | 0.0143705 | 0.0488047 | 30.734   | 0.510  | 30.297   | 31.295   | 34.805   | 1.078  | 34.042   | 36.038   |
| 1344 | ENSG00000237289 | CKMT1B    | -1.1 | 0.0016823 | 0.0089026 | 29.733   | 0.681  | 28.980   | 30.305   | 34.713   | 1.562  | 33.477   | 36.469   |
| 1345 | ENSG00000247572 | CKMT2-AS1 | -1.1 | 0.0825503 | 0.185958  | 5.503    | 0.249  | 5.217    | 5.664    | 6.396    | 0.191  | 6.187    | 6.564    |
| 1346 | ENSG00000123975 | CKS2      | -1.1 | 5.296E-05 | 0.000536  | 1036.143 | 29.705 | 1002.915 | 1060.128 | 1212.328 | 85.415 | 1149.137 | 1309.504 |
| 1347 | ENSG00000121940 | CLCC1     | 1.2  | 0.0008674 | 0.0052062 | 20.839   | 0.500  | 20.315   | 21.309   | 18.291   | 1.190  | 17.423   | 19.647   |
| 1348 | ENSG00000175505 | CLCF1     | 2.5  | 3.937E-07 | 8.809E-06 | 3.899    | 0.328  | 3.621    | 4.261    | 1.613    | 0.349  | 1.267    | 1.966    |
| 1349 | ENSG00000114859 | CLCN2     | -1.1 | 0.0608861 | 0.1473127 | 3.945    | 0.170  | 3.759    | 4.091    | 4.512    | 0.085  | 4.422    | 4.592    |
| 1350 | ENSG00000073464 | CLCN4     | 1.4  | 5.386E-08 | 1.593E-06 | 11.949   | 0.038  | 11.918   | 11.991   | 8.842    | 0.016  | 8.823    | 8.853    |
| 1351 | ENSG00000171365 | CLCN5     | 1.2  | 2.117E-05 | 0.0002494 | 16.115   | 0.184  | 15.962   | 16.320   | 13.889   | 0.575  | 13.265   | 14.396   |
| 1352 | ENSG00000103249 | CLCN7     | 1.1  | 0.0382577 | 0.1032805 | 16.994   | 1.021  | 15.818   | 17.658   | 15.868   | 1.449  | 14.327   | 17.202   |
| 1353 | ENSG00000186510 | CLCNKA    | -1.7 | 0.0027633 | 0.0132058 | 0.908    | 0.203  | 0.686    | 1.084    | 1.562    | 0.199  | 1.385    | 1.777    |
| 1354 | ENSG00000184908 | CLCNKB    | -1.5 | 0.0039298 | 0.0175367 | 2.163    | 0.209  | 1.934    | 2.345    | 3.301    | 0.220  | 3.104    | 3.539    |
| 1355 | ENSG00000163347 | CLDN1     | -1.8 | 0.0003588 | 0.0025516 | 2.033    | 0.818  | 1.098    | 2.620    | 3.765    | 0.886  | 3.180    | 4.784    |
| 1356 | ENSG00000134873 | CLDN10    | 1.2  | 0.0007711 | 0.004722  | 26.458   | 3.114  | 22.977   | 28.980   | 22.424   | 1.598  | 20.591   | 23.525   |
| 1357 | ENSG00000013297 | CLDN11    | 1.6  | 1.141E-06 | 2.124E-05 | 3.414    | 0.204  | 3.264    | 3.647    | 2.120    | 0.337  | 1.731    | 2.334    |
| 1358 | ENSG00000157224 | CLDN12    | 1.2  | 2.194E-05 | 0.0002579 | 35.355   | 1.457  | 33.905   | 36.820   | 30.611   | 1.245  | 29.210   | 31.590   |
| 1359 | ENSG00000165215 | CLDN3     | -1.3 | 0.0003862 | 0.0027169 | 28.264   | 4.214  | 23.873   | 32.276   | 37.473   | 2.729  | 35.229   | 40.512   |
| 1360 | ENSG00000189143 | CLDN4     | -1.4 | 6.816E-09 | 2.664E-07 | 27.985   | 2.107  | 25.717   | 29.881   | 38.705   | 1.207  | 37.355   | 39.682   |
| 1361 | ENSG00000105472 | CLEC11A   | -1.4 | 0.0276667 | 0.0809835 | 2.823    | 0.190  | 2.637    | 3.017    | 4.049    | 0.391  | 3.700    | 4.472    |
| 1362 | ENSG00000069493 | CLEC2D    | -1.2 | 0.0661697 | 0.1570099 | 3.417    | 0.095  | 3.309    | 3.490    | 4.036    | 0.390  | 3.743    | 4.479    |
| 1363 | ENSG00000213719 | CLIC1     | 1.2  | 4.648E-06 | 6.968E-05 | 267.984  | 9.181  | 260.379  | 278.183  | 236.252  | 11.071 | 223.776  | 244.905  |



|      | A               | B       | C    | D         | E         | F       | G     | H       | I       | J       | K     | L       | M       |
|------|-----------------|---------|------|-----------|-----------|---------|-------|---------|---------|---------|-------|---------|---------|
| 1364 | ENSG00000169504 | CLIC4   | 1.2  | 2.079E-07 | 5.103E-06 | 407.708 | 6.104 | 400.661 | 411.321 | 353.807 | 3.403 | 350.506 | 357.304 |
| 1365 | ENSG00000159212 | CLIC6   | 1.3  | 0.0032288 | 0.0149492 | 7.894   | 0.767 | 7.153   | 8.684   | 6.381   | 0.836 | 5.431   | 7.010   |
| 1366 | ENSG00000113282 | CLINT1  | -1.1 | 0.1044034 | 0.2199795 | 54.654  | 2.328 | 52.032  | 56.480  | 58.694  | 1.444 | 57.446  | 60.276  |
| 1367 | ENSG00000130779 | CLIP1   | 1.3  | 4.267E-07 | 9.458E-06 | 7.583   | 0.198 | 7.394   | 7.789   | 5.935   | 0.222 | 5.711   | 6.156   |
| 1368 | ENSG00000106665 | CLIP2   | 1.3  | 4.172E-07 | 9.272E-06 | 31.799  | 1.231 | 30.417  | 32.779  | 25.080  | 1.352 | 23.613  | 26.277  |
| 1369 | ENSG00000105270 | CLIP3   | -1.3 | 4.27E-05  | 0.00045   | 14.415  | 1.624 | 12.565  | 15.602  | 19.429  | 2.610 | 16.591  | 21.727  |
| 1370 | ENSG00000115295 | CLIP4   | 2.8  | 1.799E-05 | 0.0002169 | 0.668   | 0.271 | 0.475   | 0.977   | 0.248   | 0.083 | 0.200   | 0.343   |
| 1371 | ENSG00000013441 | CLK1    | -1.1 | 0.010467  | 0.0378454 | 20.613  | 1.681 | 18.763  | 22.045  | 23.605  | 0.943 | 23.051  | 24.694  |
| 1372 | ENSG00000176444 | CLK2    | -1.1 | 0.0066945 | 0.0265535 | 27.500  | 1.172 | 26.210  | 28.501  | 31.605  | 2.094 | 29.213  | 33.105  |
| 1373 | ENSG00000232553 | CLK2P1  | -1.5 | 0.0697496 | 0.1634121 | 1.527   | 0.150 | 1.370   | 1.669   | 2.301   | 0.862 | 1.548   | 3.240   |
| 1374 | ENSG00000179335 | CLK3    | -1.4 | 1.656E-08 | 5.75E-07  | 2.414   | 0.027 | 2.394   | 2.445   | 3.572   | 0.432 | 3.217   | 4.053   |
| 1375 | ENSG00000165959 | CLMN    | -1.1 | 0.0557761 | 0.138077  | 2.432   | 0.265 | 2.144   | 2.666   | 2.806   | 0.193 | 2.679   | 3.028   |
| 1376 | ENSG00000166250 | CLMP    | 1.2  | 0.0004074 | 0.0028318 | 12.709  | 0.739 | 12.050  | 13.507  | 10.669  | 0.902 | 9.659   | 11.394  |
| 1377 | ENSG00000074201 | CLNS1A  | -1.1 | 0.0027222 | 0.0130574 | 87.051  | 1.873 | 84.915  | 88.412  | 97.240  | 2.116 | 94.854  | 98.889  |
| 1378 | ENSG00000162129 | CLPB    | -1.1 | 0.0294864 | 0.0851174 | 9.113   | 0.311 | 8.766   | 9.364   | 10.547  | 0.298 | 10.307  | 10.881  |
| 1379 | ENSG00000166855 | CLPX    | -1.1 | 0.0004597 | 0.0031275 | 40.530  | 0.948 | 39.742  | 41.582  | 46.995  | 0.678 | 46.252  | 47.582  |
| 1381 | ENSG00000171603 | CLSTN1  | -1.1 | 0.0012526 | 0.0070381 | 62.926  | 0.698 | 62.495  | 63.731  | 71.507  | 3.672 | 69.138  | 75.738  |
| 1382 | ENSG00000139182 | CLSTN3  | 1.4  | 1.061E-07 | 2.872E-06 | 12.948  | 1.593 | 11.162  | 14.225  | 9.242   | 0.864 | 8.314   | 10.024  |
| 1383 | ENSG00000175416 | CLTB    | 1.1  | 0.0913456 | 0.2004898 | 17.168  | 0.186 | 17.025  | 17.378  | 15.739  | 0.889 | 14.733  | 16.415  |
| 1384 | ENSG00000141367 | CLTC    | 1    | 0.086335  | 0.1921294 | 145.450 | 2.785 | 142.263 | 147.415 | 142.407 | 5.280 | 136.576 | 146.865 |
| 1385 | ENSG00000070371 | CLTCL1  | -1.1 | 0.0119501 | 0.0420716 | 6.387   | 0.415 | 6.138   | 6.866   | 7.417   | 0.515 | 6.925   | 7.953   |
| 1386 | ENSG00000120885 | CLU     | 1.5  | 4.48E-16  | 1.10E-13  | 102.862 | 6.958 | 95.648  | 109.532 | 70.160  | 0.534 | 69.545  | 70.490  |
| 1387 | ENSG00000103351 | CLUAP1  | -1.1 | 0.1009134 | 0.2144425 | 4.274   | 0.245 | 4.035   | 4.525   | 4.840   | 0.272 | 4.680   | 5.154   |
| 1388 | ENSG00000131797 | CLUHP3  | -1.1 | 0.0274243 | 0.0804487 | 5.116   | 0.272 | 4.834   | 5.376   | 6.015   | 0.346 | 5.679   | 6.370   |
| 1389 | ENSG00000146352 | CLVS2   | -1.5 | 0.0009147 | 0.0054246 | 0.584   | 0.102 | 0.467   | 0.656   | 0.926   | 0.083 | 0.831   | 0.974   |
| 1390 | ENSG00000125246 | CLYBL   | -1.1 | 0.1205341 | 0.2436469 | 5.568   | 0.277 | 5.401   | 5.888   | 6.228   | 0.210 | 6.027   | 6.447   |
| 1391 | ENSG00000111726 | CMAS    | -1.1 | 0.0050096 | 0.0211766 | 84.906  | 2.166 | 83.187  | 87.339  | 95.768  | 3.761 | 91.425  | 97.962  |
| 1392 | ENSG00000164237 | CMBL    | -1.1 | 0.0934784 | 0.2034488 | 34.074  | 3.424 | 31.576  | 37.977  | 37.785  | 2.913 | 34.947  | 40.768  |
| 1393 | ENSG00000153815 | CMIP    | -1.1 | 0.0037252 | 0.016752  | 11.935  | 0.993 | 10.811  | 12.690  | 13.774  | 0.725 | 12.996  | 14.428  |
| 1394 | ENSG00000174600 | CMKLR1  | 2.5  | 6.268E-06 | 8.954E-05 | 1.188   | 0.298 | 1.012   | 1.532   | 0.489   | 0.135 | 0.409   | 0.645   |
| 1395 | ENSG00000162368 | CMPK1   | 1.1  | 0.0207963 | 0.0650626 | 49.036  | 4.196 | 45.467  | 53.658  | 45.406  | 3.857 | 42.151  | 49.667  |
| 1397 | ENSG00000184220 | CMSS1   | -1.1 | 0.1196395 | 0.2422729 | 14.173  | 1.767 | 12.950  | 16.198  | 15.550  | 0.445 | 15.293  | 16.064  |
| 1398 | ENSG00000183723 | CMTM4   | -1.2 | 1.615E-08 | 5.654E-07 | 46.730  | 1.277 | 45.256  | 47.484  | 58.532  | 3.037 | 55.025  | 60.328  |
| 1399 | ENSG00000091317 | CMTM6   | 1.1  | 0.0507399 | 0.1284676 | 88.933  | 1.602 | 87.814  | 90.768  | 85.514  | 2.946 | 82.277  | 88.038  |
| 1400 | ENSG00000170293 | CMTM8   | -1.2 | 0.0743938 | 0.1713965 | 13.329  | 1.656 | 12.183  | 15.227  | 16.046  | 2.279 | 14.419  | 18.651  |
| 1401 | ENSG00000137200 | CMTR1   | -1.1 | 0.0058886 | 0.0240508 | 30.096  | 0.888 | 29.577  | 31.122  | 33.837  | 0.319 | 33.574  | 34.192  |
| 1402 | ENSG00000180917 | CMTR2   | -1.1 | 0.013644  | 0.046779  | 11.422  | 0.387 | 11.048  | 11.820  | 13.116  | 0.774 | 12.249  | 13.738  |
| 1403 | ENSG00000164309 | CMYA5   | 1.4  | 0.0002057 | 0.0016275 | 1.519   | 0.137 | 1.406   | 1.671   | 1.070   | 0.207 | 0.836   | 1.227   |
| 1404 | ENSG00000133313 | CNDP2   | 1.2  | 7.993E-06 | 0.0001103 | 37.662  | 0.540 | 37.158  | 38.232  | 32.983  | 1.583 | 31.157  | 33.961  |
| 1405 | ENSG00000205423 | CNEP1R1 | -1.1 | 0.0828701 | 0.1864302 | 9.442   | 0.096 | 9.335   | 9.521   | 10.650  | 0.472 | 10.110  | 10.985  |
| 1406 | ENSG00000105427 | CNFN    | -1.4 | 0.0258738 | 0.0769568 | 13.854  | 4.733 | 10.529  | 19.272  | 19.480  | 5.440 | 16.081  | 25.754  |
| 1407 | ENSG00000198515 | CNGA1   | -1.9 | 0.0003452 | 0.0024772 | 1.006   | 0.330 | 0.707   | 1.361   | 1.957   | 0.083 | 1.908   | 2.053   |
| 1408 | ENSG00000174871 | CNIH2   | -1.3 | 0.0630902 | 0.1514612 | 3.342   | 0.487 | 2.783   | 3.672   | 4.318   | 0.738 | 3.528   | 4.989   |

|      | A               | B        | C    | D         | E         | F       | G      | H       | I       | J       | K     | L       | M       |
|------|-----------------|----------|------|-----------|-----------|---------|--------|---------|---------|---------|-------|---------|---------|
| 1409 | ENSG00000143786 | CNIH3    | 1.6  | 4.366E-05 | 0.0004578 | 2.521   | 0.235  | 2.312   | 2.776   | 1.589   | 0.141 | 1.459   | 1.739   |
| 1410 | ENSG00000143771 | CNIH4    | 1.5  | 9.43E-15  | 1.75E-12  | 53.623  | 0.710  | 52.808  | 54.106  | 36.685  | 1.574 | 34.880  | 37.777  |
| 1411 | ENSG00000153721 | CNKS3    | -1.1 | 0.0704056 | 0.1645064 | 1.307   | 0.117  | 1.175   | 1.398   | 1.516   | 0.199 | 1.361   | 1.741   |
| 1412 | ENSG00000136110 | CNMD     | -1.3 | 1.361E-07 | 3.564E-06 | 80.551  | 4.925  | 75.636  | 85.486  | 104.504 | 4.074 | 99.948  | 107.794 |
| 1413 | ENSG00000130176 | CNN1     | 1.8  | 7.281E-07 | 1.47E-05  | 37.683  | 6.182  | 30.736  | 42.577  | 22.007  | 0.672 | 21.356  | 22.699  |
| 1414 | ENSG00000064666 | CNN2     | 1.1  | 0.0044925 | 0.0194727 | 264.262 | 17.535 | 244.495 | 277.942 | 247.836 | 7.388 | 240.895 | 255.602 |
| 1415 | ENSG00000117519 | CNN3     | 1.1  | 1.073E-05 | 0.0001416 | 288.011 | 5.870  | 282.648 | 294.282 | 260.203 | 3.888 | 257.355 | 264.633 |
| 1416 | ENSG00000148842 | CNNM2    | -1.2 | 4.532E-05 | 0.0004725 | 6.010   | 0.547  | 5.517   | 6.598   | 7.608   | 0.673 | 6.859   | 8.163   |
| 1417 | ENSG00000168763 | CNNM3    | -1.3 | 3.54E-05  | 0.0003833 | 16.114  | 1.418  | 14.477  | 16.962  | 20.984  | 1.733 | 19.237  | 22.702  |
| 1418 | ENSG00000158158 | CNNM4    | -1.3 | 2.819E-06 | 4.532E-05 | 10.264  | 0.642  | 9.724   | 10.973  | 13.882  | 0.596 | 13.203  | 14.319  |
| 1419 | ENSG00000111596 | CNOT2    | -1.2 | 2.843E-05 | 0.0003197 | 17.778  | 0.538  | 17.178  | 18.217  | 21.045  | 0.406 | 20.733  | 21.503  |
| 1420 | ENSG00000088038 | CNOT3    | -1.3 | 9.89E-09  | 3.709E-07 | 19.330  | 0.762  | 18.478  | 19.948  | 26.377  | 0.939 | 25.751  | 27.457  |
| 1421 | ENSG00000138767 | CNOT6L   | 1.1  | 0.0129327 | 0.0448126 | 13.143  | 0.741  | 12.507  | 13.957  | 11.951  | 1.031 | 10.760  | 12.570  |
| 1422 | ENSG00000230183 | CNOT6LP1 | 1.4  | 0.0163256 | 0.0539547 | 5.944   | 0.176  | 5.760   | 6.110   | 4.399   | 1.236 | 2.974   | 5.194   |
| 1423 | ENSG00000198791 | CNOT7    | -1.1 | 0.0065697 | 0.0261643 | 39.060  | 1.396  | 38.113  | 40.663  | 43.240  | 1.906 | 41.425  | 45.226  |
| 1424 | ENSG00000144580 | CNOT9    | 1.1  | 0.0243783 | 0.0735479 | 41.606  | 1.220  | 40.533  | 42.934  | 39.483  | 1.574 | 38.369  | 41.284  |
| 1426 | ENSG00000173786 | CNP      | 1.1  | 0.075045  | 0.1725406 | 21.762  | 1.143  | 20.578  | 22.859  | 20.887  | 0.591 | 20.496  | 21.566  |
| 1428 | ENSG00000115649 | CNPPD1   | -1.1 | 0.0968233 | 0.2083834 | 21.576  | 0.974  | 20.502  | 22.402  | 23.986  | 2.101 | 21.586  | 25.500  |
| 1430 | ENSG00000018236 | CNTN1    | -1.3 | 0.0013459 | 0.0074221 | 2.439   | 0.051  | 2.385   | 2.486   | 3.334   | 0.667 | 2.674   | 4.008   |
| 1431 | ENSG00000144619 | CNTN4    | 1.4  | 0.0808738 | 0.1828145 | 0.498   | 0.054  | 0.437   | 0.539   | 0.370   | 0.105 | 0.256   | 0.463   |
| 1432 | ENSG00000174469 | CNTNAP2  | 1.2  | 0.0002467 | 0.0018917 | 14.837  | 1.331  | 13.586  | 16.237  | 13.026  | 0.190 | 12.827  | 13.206  |
| 1433 | ENSG00000119397 | CNTRL    | 1.1  | 0.0041522 | 0.0183001 | 14.403  | 0.508  | 13.875  | 14.888  | 13.103  | 0.374 | 12.672  | 13.345  |
| 1434 | ENSG00000170037 | CNTROB   | -1.2 | 1.617E-05 | 0.0001981 | 13.212  | 0.464  | 12.742  | 13.670  | 16.761  | 1.337 | 15.232  | 17.712  |
| 1435 | ENSG00000106078 | COBL     | -1.3 | 1.865E-09 | 8.619E-08 | 21.846  | 0.708  | 21.196  | 22.600  | 28.337  | 1.493 | 26.700  | 29.625  |
| 1436 | ENSG00000100473 | COCH     | 1.6  | 4.772E-10 | 2.53E-08  | 16.486  | 0.406  | 16.024  | 16.787  | 10.791  | 0.248 | 10.508  | 10.971  |
| 1437 | ENSG00000135775 | COG2     | -1.2 | 0.002711  | 0.013015  | 8.900   | 1.002  | 8.280   | 10.056  | 10.544  | 0.908 | 9.669   | 11.482  |
| 1438 | ENSG00000136152 | COG3     | -1.1 | 0.0424742 | 0.1118775 | 12.813  | 0.563  | 12.246  | 13.373  | 14.378  | 0.791 | 13.830  | 15.285  |
| 1439 | ENSG00000164597 | COG5     | -1.1 | 0.0499366 | 0.1268325 | 13.581  | 0.043  | 13.531  | 13.610  | 15.051  | 1.272 | 13.903  | 16.419  |
| 1440 | ENSG00000133103 | COG6     | -1.1 | 0.0334583 | 0.0937908 | 10.787  | 0.283  | 10.607  | 11.113  | 12.237  | 0.948 | 11.400  | 13.266  |
| 1442 | ENSG00000168434 | COG7     | 1.2  | 0.0004793 | 0.0032324 | 14.312  | 0.856  | 13.632  | 15.274  | 11.940  | 0.335 | 11.560  | 12.194  |
| 1443 | ENSG00000213380 | COG8     | -1.2 | 0.0283011 | 0.0825555 | 5.665   | 0.488  | 5.289   | 6.217   | 6.713   | 0.178 | 6.507   | 6.820   |
| 1444 | ENSG00000121058 | COIL     | -1.4 | 2.314E-09 | 1.038E-07 | 31.362  | 1.774  | 29.354  | 32.717  | 43.997  | 2.627 | 41.106  | 46.238  |
| 1445 | ENSG00000060718 | COL11A1  | 1.8  | 8.59E-16  | 1.89E-13  | 17.085  | 1.195  | 15.805  | 18.172  | 9.768   | 0.059 | 9.706   | 9.823   |
| 1446 | ENSG00000204248 | COL11A2  | -1.2 | 0.0926174 | 0.202292  | 1.613   | 0.441  | 1.336   | 2.122   | 2.045   | 0.495 | 1.498   | 2.460   |
| 1447 | ENSG00000111799 | COL12A1  | 2.7  | 1.90E-20  | 1.34E-17  | 7.696   | 0.535  | 7.079   | 8.009   | 2.908   | 0.063 | 2.837   | 2.957   |
| 1448 | ENSG00000187955 | COL14A1  | 1.2  | 4.454E-06 | 6.72E-05  | 15.172  | 0.339  | 14.804  | 15.472  | 12.619  | 0.526 | 12.141  | 13.182  |
| 1449 | ENSG00000182871 | COL18A1  | 1.1  | 0.1199111 | 0.2427065 | 93.979  | 1.296  | 93.159  | 95.473  | 90.986  | 7.163 | 85.900  | 99.178  |
| 1450 | ENSG00000164692 | COL1A2   | 1    | 0.1225046 | 0.2466866 | 41.413  | 1.582  | 40.425  | 43.239  | 40.452  | 1.932 | 38.221  | 41.609  |
| 1454 | ENSG00000124749 | COL21A1  | 1.5  | 2.919E-05 | 0.0003258 | 3.355   | 0.016  | 3.338   | 3.368   | 2.347   | 0.381 | 1.910   | 2.611   |
| 1455 | ENSG00000169436 | COL22A1  | 1.1  | 0.1139546 | 0.2339257 | 2.814   | 0.367  | 2.564   | 3.235   | 2.499   | 0.423 | 2.025   | 2.836   |
| 1456 | ENSG00000188517 | COL25A1  | -1.2 | 0.0289086 | 0.0838503 | 3.741   | 0.146  | 3.575   | 3.852   | 4.476   | 0.293 | 4.255   | 4.809   |
| 1457 | ENSG00000160963 | COL26A1  | 1.2  | 3.77E-07  | 8.489E-06 | 83.810  | 1.885  | 81.635  | 84.972  | 70.750  | 2.941 | 67.808  | 73.690  |

|      | A               | B        | C    | D         | E         | F      | G     | H      | I      | J       | K     | L       | M       |
|------|-----------------|----------|------|-----------|-----------|--------|-------|--------|--------|---------|-------|---------|---------|
| 1460 | ENSG00000196739 | COL27A1  | -1.2 | 0.0001901 | 0.0015316 | 5.610  | 0.736 | 4.836  | 6.301  | 7.108   | 0.216 | 6.896   | 7.328   |
| 1461 | ENSG00000187498 | COL4A1   | 1.1  | 0.000147  | 0.0012375 | 65.171 | 1.037 | 64.361 | 66.339 | 59.653  | 1.455 | 58.129  | 61.028  |
| 1462 | ENSG00000134871 | COL4A2   | 1.1  | 0.002524  | 0.012274  | 60.445 | 1.763 | 58.475 | 61.872 | 55.576  | 4.098 | 52.274  | 60.163  |
| 1463 | ENSG00000169031 | COL4A3   | 1.6  | 0.0101749 | 0.0369842 | 0.465  | 0.057 | 0.405  | 0.518  | 0.297   | 0.020 | 0.274   | 0.311   |
| 1464 | ENSG00000113163 | COL4A3BP | -1.1 | 0.0203472 | 0.0639177 | 26.789 | 0.222 | 26.552 | 26.993 | 29.566  | 0.835 | 28.668  | 30.321  |
| 1465 | ENSG00000081052 | COL4A4   | 1.4  | 0.0030544 | 0.0143062 | 1.362  | 0.024 | 1.343  | 1.389  | 1.018   | 0.134 | 0.901   | 1.164   |
| 1466 | ENSG00000197565 | COL4A6   | 1.2  | 0.0003562 | 0.0025378 | 19.326 | 1.379 | 17.815 | 20.517 | 17.013  | 0.650 | 16.397  | 17.692  |
| 1467 | ENSG00000130635 | COL5A1   | 1.1  | 0.0906258 | 0.1993956 | 4.175  | 0.445 | 3.708  | 4.595  | 3.835   | 0.462 | 3.356   | 4.277   |
| 1468 | ENSG00000080573 | COL5A3   | -1.4 | 0.0237111 | 0.0720065 | 0.966  | 0.196 | 0.744  | 1.116  | 1.342   | 0.173 | 1.187   | 1.529   |
| 1469 | ENSG00000163359 | COL6A3   | -1.3 | 0.0004752 | 0.0032112 | 1.232  | 0.088 | 1.161  | 1.331  | 1.613   | 0.045 | 1.566   | 1.657   |
| 1470 | ENSG00000144810 | COL8A1   | 2.2  | 8.784E-05 | 0.0008127 | 0.577  | 0.177 | 0.380  | 0.722  | 0.266   | 0.035 | 0.231   | 0.302   |
| 1471 | ENSG00000049089 | COL9A2   | 1.5  | 0.0002623 | 0.0019861 | 4.258  | 0.218 | 4.020  | 4.449  | 2.976   | 0.404 | 2.713   | 3.442   |
| 1472 | ENSG00000092758 | COL9A3   | 1.2  | 4.198E-05 | 0.0004437 | 37.123 | 1.089 | 36.033 | 38.210 | 31.416  | 2.620 | 29.221  | 34.316  |
| 1473 | ENSG00000118004 | COLEC11  | 1.8  | 0.0245351 | 0.073876  | 0.960  | 0.143 | 0.797  | 1.064  | 0.552   | 0.114 | 0.421   | 0.619   |
| 1474 | ENSG00000198756 | COLGALT2 | 1.3  | 0.0194302 | 0.0615681 | 2.099  | 0.403 | 1.647  | 2.419  | 1.670   | 0.318 | 1.304   | 1.868   |
| 1475 | ENSG00000173163 | COMMD1   | 1.1  | 0.0456956 | 0.1185897 | 18.944 | 1.573 | 17.141 | 20.042 | 17.253  | 0.676 | 16.489  | 17.774  |
| 1476 | ENSG00000148444 | COMMD3   | 1.7  | 0.0046467 | 0.0199904 | 1.653  | 0.364 | 1.380  | 2.066  | 1.017   | 0.311 | 0.749   | 1.358   |
| 1477 | ENSG00000140365 | COMMD4   | 1.1  | 0.0024772 | 0.0120776 | 15.328 | 0.778 | 14.549 | 16.106 | 13.699  | 0.690 | 13.158  | 14.477  |
| 1478 | ENSG00000170619 | COMMD5   | 1.2  | 0.0251958 | 0.0753824 | 9.980  | 0.726 | 9.193  | 10.624 | 8.728   | 0.787 | 8.239   | 9.636   |
| 1479 | ENSG00000149600 | COMMD7   | -1.2 | 0.000195  | 0.0015633 | 29.747 | 1.804 | 28.587 | 31.826 | 36.536  | 0.761 | 35.909  | 37.382  |
| 1480 | ENSG00000110442 | COMMD9   | 1.3  | 7.623E-05 | 0.0007243 | 5.707  | 0.122 | 5.581  | 5.823  | 4.472   | 0.126 | 4.342   | 4.594   |
| 1481 | ENSG00000122218 | COPA     | -1.1 | 1.427E-05 | 0.0001798 | 70.330 | 1.082 | 69.155 | 71.286 | 81.890  | 1.366 | 80.790  | 83.419  |
| 1482 | ENSG00000129083 | COPB1    | -1.1 | 0.0002314 | 0.001796  | 74.487 | 3.684 | 70.732 | 78.095 | 85.560  | 1.896 | 83.518  | 87.265  |
| 1483 | ENSG00000184432 | COPB2    | -1.1 | 8.363E-05 | 0.0007802 | 67.450 | 0.627 | 66.795 | 68.043 | 77.344  | 3.104 | 74.089  | 80.270  |
| 1484 | ENSG00000181789 | COPG1    | -1.1 | 0.053076  | 0.1330057 | 62.355 | 1.957 | 60.192 | 64.005 | 67.616  | 0.714 | 66.830  | 68.226  |
| 1486 | ENSG00000158623 | COPG2    | -1.1 | 0.0192118 | 0.0610197 | 92.914 | 3.877 | 89.215 | 96.946 | 101.940 | 0.854 | 101.245 | 102.893 |
| 1487 | ENSG00000172301 | COPRS    | 1.2  | 0.0002707 | 0.0020387 | 68.338 | 1.450 | 66.751 | 69.595 | 58.136  | 5.389 | 53.959  | 64.220  |
| 1488 | ENSG00000166200 | COPS2    | -1.1 | 0.0008995 | 0.0053512 | 39.427 | 2.395 | 37.455 | 42.092 | 45.190  | 1.097 | 44.317  | 46.422  |
| 1489 | ENSG00000172428 | COPS9    | -1.2 | 0.0003659 | 0.0025966 | 30.868 | 1.994 | 29.081 | 33.019 | 37.794  | 1.454 | 36.635  | 39.426  |
| 1490 | ENSG00000135469 | COQ10A   | -1.1 | 0.0917048 | 0.2010112 | 13.840 | 0.474 | 13.294 | 14.150 | 15.597  | 0.267 | 15.288  | 15.755  |
| 1491 | ENSG00000173085 | COQ2     | 1.1  | 0.0507563 | 0.12849   | 20.451 | 0.702 | 19.652 | 20.970 | 18.828  | 0.698 | 18.229  | 19.594  |
| 1492 | ENSG00000163050 | COQ8A    | -1.1 | 0.0012734 | 0.0071228 | 13.817 | 0.576 | 13.321 | 14.448 | 16.214  | 0.689 | 15.815  | 17.010  |
| 1493 | ENSG00000172725 | CORO1B   | 1.1  | 0.0221105 | 0.0681157 | 40.554 | 1.506 | 38.941 | 41.924 | 38.188  | 1.686 | 36.471  | 39.841  |
| 1494 | ENSG00000110880 | CORO1C   | 1.2  | 4.281E-08 | 1.312E-06 | 86.538 | 3.047 | 83.022 | 88.406 | 73.612  | 1.304 | 72.202  | 74.773  |
| 1495 | ENSG00000103647 | CORO2B   | 1.2  | 0.0431937 | 0.1134018 | 3.779  | 0.131 | 3.656  | 3.917  | 3.161   | 0.569 | 2.505   | 3.521   |
| 1497 | ENSG00000167549 | CORO6    | -1.7 | 9.159E-05 | 0.0008418 | 1.256  | 0.192 | 1.034  | 1.368  | 2.235   | 0.381 | 1.941   | 2.665   |
| 1499 | ENSG00000262246 | CORO7    | -1.2 | 0.045214  | 0.1176286 | 1.188  | 0.036 | 1.159  | 1.228  | 1.491   | 0.057 | 1.442   | 1.554   |
| 1502 | ENSG00000103187 | COTL1    | 1.2  | 0.0006704 | 0.0042325 | 49.184 | 1.154 | 47.992 | 50.295 | 42.323  | 3.452 | 39.158  | 46.004  |
| 1503 | ENSG00000231162 | COX11P1  | -1.7 | 0.0343394 | 0.0955547 | 1.863  | 0.797 | 1.061  | 2.654  | 3.306   | 1.144 | 2.418   | 4.597   |
| 1504 | ENSG00000178449 | COX14    | -1.2 | 0.0114385 | 0.040583  | 23.698 | 0.611 | 22.994 | 24.080 | 28.741  | 2.884 | 25.507  | 31.047  |
| 1505 | ENSG00000014919 | COX15    | -1.2 | 0.0002221 | 0.0017374 | 32.902 | 2.059 | 30.946 | 35.051 | 39.149  | 0.317 | 38.791  | 39.394  |

|      | A               | B        | C    | D         | E         | F       | G      | H       | I       | J       | K      | L       | M       |
|------|-----------------|----------|------|-----------|-----------|---------|--------|---------|---------|---------|--------|---------|---------|
| 1506 | ENSG00000163626 | COX18    | 1.1  | 0.0516833 | 0.1302162 | 14.915  | 0.662  | 14.477  | 15.676  | 14.038  | 0.487  | 13.564  | 14.537  |
| 1507 | ENSG00000213025 | COX20P1  | 1.2  | 0.0861755 | 0.1918907 | 40.035  | 0.977  | 39.020  | 40.970  | 34.854  | 4.169  | 30.233  | 38.333  |
| 1508 | ENSG00000178741 | COX5A    | -1.1 | 0.0394666 | 0.1058514 | 212.255 | 7.103  | 204.102 | 217.107 | 230.962 | 2.284  | 228.932 | 233.435 |
| 1509 | ENSG00000135940 | COX5B    | -1.1 | 0.0861565 | 0.1918907 | 180.092 | 2.629  | 177.062 | 181.764 | 194.571 | 4.822  | 189.787 | 199.430 |
| 1510 | ENSG00000160471 | COX6B2   | -1.5 | 0.0006641 | 0.0041994 | 1.994   | 0.378  | 1.626   | 2.382   | 3.092   | 0.200  | 2.870   | 3.257   |
| 1511 | ENSG00000131174 | COX7B    | -1.1 | 0.0012786 | 0.0071465 | 81.233  | 0.931  | 80.208  | 82.025  | 93.041  | 4.968  | 88.905  | 98.551  |
| 1512 | ENSG00000127184 | COX7C    | -1.1 | 0.000411  | 0.0028524 | 472.827 | 5.006  | 468.986 | 478.489 | 531.385 | 2.871  | 529.006 | 534.574 |
| 1513 | ENSG00000108582 | CPD      | 1.2  | 4.277E-06 | 6.494E-05 | 34.468  | 0.560  | 34.070  | 35.109  | 30.265  | 0.504  | 29.697  | 30.658  |
| 1514 | ENSG00000214575 | CPEB1    | 1.6  | 3.473E-06 | 5.418E-05 | 2.368   | 0.154  | 2.231   | 2.534   | 1.479   | 0.124  | 1.381   | 1.618   |
| 1515 | ENSG00000113742 | CPEB4    | 1.2  | 0.0021798 | 0.010837  | 4.580   | 0.310  | 4.351   | 4.933   | 3.852   | 0.223  | 3.609   | 4.045   |
| 1516 | ENSG00000145920 | CPLX2    | -1.9 | 0.0426246 | 0.112204  | 0.160   | 0.100  | 0.083   | 0.273   | 0.304   | 0.123  | 0.165   | 0.397   |
| 1517 | ENSG00000135678 | CPM      | 1.4  | 0.052935  | 0.1327338 | 0.590   | 0.055  | 0.549   | 0.652   | 0.431   | 0.106  | 0.311   | 0.515   |
| 1518 | ENSG00000214078 | CPNE1    | -1.1 | 0.0013472 | 0.0074265 | 74.952  | 3.499  | 70.941  | 77.383  | 85.391  | 3.313  | 83.288  | 89.210  |
| 1519 | ENSG00000085719 | CPNE3    | 1.1  | 0.0285595 | 0.0830799 | 39.430  | 1.242  | 38.345  | 40.784  | 37.550  | 0.698  | 36.792  | 38.166  |
| 1521 | ENSG00000178773 | CPNE7    | -1.9 | 1.349E-07 | 3.537E-06 | 3.095   | 0.340  | 2.889   | 3.488   | 5.994   | 0.537  | 5.452   | 6.527   |
| 1523 | ENSG00000139117 | CPNE8    | 1.4  | 0.0001028 | 0.0009242 | 5.627   | 0.301  | 5.304   | 5.898   | 4.242   | 0.211  | 4.079   | 4.480   |
| 1524 | ENSG00000021826 | CPS1     | 1.2  | 0.0042353 | 0.0185766 | 6.571   | 0.157  | 6.391   | 6.677   | 5.762   | 0.587  | 5.092   | 6.186   |
| 1525 | ENSG00000071894 | CPSF1    | -1.1 | 0.0051444 | 0.0216006 | 41.436  | 1.897  | 40.293  | 43.626  | 46.971  | 2.679  | 44.168  | 49.506  |
| 1526 | ENSG00000214076 | CPSF1P1  | -2.1 | 2.931E-07 | 6.876E-06 | 1.442   | 0.260  | 1.278   | 1.742   | 3.076   | 0.053  | 3.019   | 3.123   |
| 1527 | ENSG00000165934 | CPSF2    | -1.1 | 0.0001025 | 0.0009219 | 35.591  | 0.130  | 35.449  | 35.704  | 40.980  | 1.739  | 39.342  | 42.805  |
| 1528 | ENSG00000119203 | CPSF3    | -1.1 | 0.0002543 | 0.0019366 | 90.860  | 0.928  | 90.118  | 91.901  | 103.487 | 1.628  | 101.610 | 104.529 |
| 1529 | ENSG00000111605 | CPSF6    | -1.1 | 9.433E-05 | 0.0008619 | 86.682  | 1.543  | 85.765  | 88.464  | 99.539  | 1.597  | 98.016  | 101.200 |
| 1530 | ENSG00000110090 | CPT1A    | 1.1  | 0.0711172 | 0.1657669 | 4.407   | 0.235  | 4.253   | 4.678   | 3.928   | 0.307  | 3.573   | 4.105   |
| 1531 | ENSG00000106066 | CPVL     | 1.3  | 1.027E-07 | 2.804E-06 | 48.220  | 0.139  | 48.082  | 48.360  | 38.391  | 2.472  | 36.375  | 41.150  |
| 1532 | ENSG00000088882 | CPXM1    | 1.1  | 0.0127211 | 0.0442142 | 44.724  | 1.133  | 43.493  | 45.725  | 40.630  | 1.317  | 39.366  | 41.994  |
| 1533 | ENSG00000166426 | CRABP1   | -1.1 | 0.0052018 | 0.0217715 | 139.876 | 5.801  | 133.222 | 143.871 | 162.283 | 14.008 | 146.719 | 173.882 |
| 1534 | ENSG00000143320 | CRABP2   | -1.1 | 0.0283661 | 0.0826594 | 209.606 | 20.533 | 185.898 | 221.744 | 236.513 | 19.129 | 214.526 | 249.326 |
| 1536 | ENSG00000177685 | CRACR2B  | -1.2 | 0.0155188 | 0.05181   | 9.920   | 0.760  | 9.320   | 10.775  | 11.716  | 0.121  | 11.589  | 11.831  |
| 1537 | ENSG00000095321 | CRAT     | -1.1 | 0.0555525 | 0.137624  | 9.448   | 1.260  | 8.305   | 10.800  | 10.964  | 0.542  | 10.413  | 11.497  |
| 1538 | ENSG00000148204 | CRB2     | -1.6 | 1.038E-06 | 1.966E-05 | 2.909   | 0.200  | 2.698   | 3.095   | 4.822   | 0.853  | 3.838   | 5.332   |
| 1539 | ENSG00000241258 | CRCP     | -1.1 | 0.1179935 | 0.240003  | 16.846  | 0.863  | 16.077  | 17.779  | 18.622  | 0.303  | 18.357  | 18.952  |
| 1541 | ENSG00000143578 | CREB3L4  | -1.1 | 0.0796607 | 0.1806519 | 21.372  | 0.552  | 20.743  | 21.774  | 23.871  | 1.542  | 22.183  | 25.205  |
| 1542 | ENSG00000146592 | CREB5    | 3.1  | 2.57E-12  | 2.546E-10 | 1.404   | 0.231  | 1.263   | 1.671   | 0.454   | 0.062  | 0.400   | 0.522   |
| 1543 | ENSG00000005339 | CREBBP   | -1.1 | 0.0501973 | 0.1273417 | 12.399  | 0.347  | 12.085  | 12.771  | 13.519  | 0.645  | 12.959  | 14.225  |
| 1544 | ENSG00000111269 | CREBL2   | 1.1  | 0.0206159 | 0.0646175 | 35.534  | 2.490  | 33.693  | 38.367  | 33.106  | 0.909  | 32.074  | 33.786  |
| 1545 | ENSG00000143162 | CREG1    | 1.2  | 0.0001855 | 0.0015025 | 37.290  | 1.280  | 35.813  | 38.089  | 32.198  | 1.290  | 30.733  | 33.163  |
| 1546 | ENSG00000184164 | CRELD2   | 1.2  | 0.0269487 | 0.0793356 | 6.861   | 0.856  | 6.086   | 7.780   | 6.011   | 0.315  | 5.816   | 6.374   |
| 1547 | ENSG00000150938 | CRIM1    | 1.3  | 4.379E-09 | 1.82E-07  | 21.795  | 0.880  | 21.097  | 22.783  | 16.898  | 0.445  | 16.616  | 17.410  |
| 1549 | ENSG00000119878 | CRIPT    | -1.2 | 0.0085721 | 0.0321943 | 12.435  | 0.734  | 11.646  | 13.095  | 15.064  | 1.244  | 13.765  | 16.244  |
| 1550 | ENSG00000103196 | CRISPLD2 | -1.1 | 0.1075614 | 0.2248965 | 3.173   | 0.179  | 2.974   | 3.320   | 3.658   | 0.345  | 3.276   | 3.947   |
| 1551 | ENSG00000167193 | CRK      | -1.1 | 0.1157232 | 0.2365616 | 45.692  | 3.464  | 41.745  | 48.223  | 49.358  | 1.182  | 47.995  | 50.094  |
| 1553 | ENSG00000099942 | CRKL     | -1.2 | 2.169E-06 | 3.628E-05 | 72.357  | 3.002  | 69.012  | 74.814  | 87.157  | 5.215  | 81.135  | 90.197  |
| 1554 | ENSG00000006016 | CRLF1    | -1.3 | 0.0016419 | 0.0087241 | 6.921   | 0.780  | 6.021   | 7.387   | 9.235   | 0.358  | 8.958   | 9.639   |

|      | A               | B        | C    | D         | E         | F       | G      | H       | I       | J       | K      | L       | M       |
|------|-----------------|----------|------|-----------|-----------|---------|--------|---------|---------|---------|--------|---------|---------|
| 1555 | ENSG00000176390 | CRLF3    | -1.1 | 0.0655259 | 0.1557173 | 19.771  | 0.539  | 19.182  | 20.241  | 21.898  | 1.624  | 20.879  | 23.772  |
| 1556 | ENSG00000245694 | CRNDE    | 1.2  | 0.0162617 | 0.0537912 | 4.494   | 0.286  | 4.220   | 4.791   | 3.699   | 0.342  | 3.311   | 3.959   |
| 1557 | ENSG00000160741 | CRTC2    | -1.1 | 0.0411981 | 0.1093509 | 8.914   | 0.571  | 8.344   | 9.487   | 10.413  | 0.771  | 9.749   | 11.258  |
| 1558 | ENSG00000100122 | CRYBB1   | -1.8 | 0.0256998 | 0.0765786 | 1.166   | 0.343  | 0.804   | 1.487   | 2.135   | 0.669  | 1.409   | 2.726   |
| 1559 | ENSG00000100058 | CRYBB2P1 | 1.2  | 0.0112229 | 0.039992  | 5.692   | 0.563  | 5.094   | 6.210   | 4.858   | 0.255  | 4.703   | 5.152   |
| 1561 | ENSG00000176092 | CRYBG2   | 1.3  | 0.000106  | 0.0009467 | 8.422   | 0.680  | 7.637   | 8.839   | 6.661   | 0.595  | 6.233   | 7.340   |
| 1562 | ENSG00000080200 | CRYBG3   | 1.1  | 0.0303314 | 0.0870074 | 7.530   | 0.469  | 7.143   | 8.052   | 6.956   | 0.237  | 6.769   | 7.223   |
| 1563 | ENSG00000213139 | CRYGS    | -1.4 | 0.0436466 | 0.1144487 | 1.423   | 0.256  | 1.247   | 1.716   | 2.053   | 0.155  | 1.877   | 2.172   |
| 1564 | ENSG00000103316 | CRYM     | -1.2 | 0.0553105 | 0.1372457 | 4.392   | 0.322  | 4.024   | 4.621   | 5.276   | 0.256  | 5.030   | 5.541   |
| 1565 | ENSG00000205758 | CRYZL1   | -1.2 | 0.0072623 | 0.0283205 | 10.792  | 0.819  | 10.275  | 11.736  | 12.706  | 0.894  | 11.766  | 13.546  |
| 1566 | ENSG00000172346 | CSDC2    | 1.5  | 0.0069575 | 0.0273942 | 1.915   | 0.261  | 1.637   | 2.155   | 1.292   | 0.121  | 1.155   | 1.386   |
| 1568 | ENSG00000009307 | CSDE1    | -1   | 0.1170969 | 0.2386958 | 433.018 | 5.042  | 427.206 | 436.213 | 458.346 | 2.785  | 455.574 | 461.144 |
| 1569 | ENSG00000103653 | CSK      | -1.1 | 0.0458644 | 0.1189366 | 17.763  | 0.342  | 17.446  | 18.126  | 19.981  | 1.312  | 19.132  | 21.492  |
| 1570 | ENSG00000183117 | CSMD1    | -1.4 | 0.0146806 | 0.0495891 | 0.367   | 0.097  | 0.284   | 0.474   | 0.513   | 0.045  | 0.482   | 0.565   |
| 1572 | ENSG00000121904 | CSMD2    | -1.3 | 6.156E-06 | 8.816E-05 | 4.328   | 0.242  | 4.078   | 4.562   | 5.714   | 0.268  | 5.431   | 5.965   |
| 1573 | ENSG00000113712 | CSNK1A1  | 1.2  | 8.38E-08  | 2.335E-06 | 59.147  | 0.886  | 58.243  | 60.013  | 50.835  | 0.915  | 50.192  | 51.883  |
| 1574 | ENSG00000141551 | CSNK1D   | -1.1 | 0.058438  | 0.142765  | 21.068  | 0.310  | 20.840  | 21.421  | 22.802  | 0.658  | 22.314  | 23.551  |
| 1576 | ENSG00000213923 | CSNK1E   | -1.2 | 4.416E-05 | 0.0004619 | 58.868  | 4.251  | 54.687  | 63.186  | 69.949  | 3.517  | 65.964  | 72.616  |
| 1577 | ENSG00000169118 | CSNK1G1  | -1.1 | 0.1241968 | 0.2492494 | 6.531   | 0.538  | 5.967   | 7.039   | 7.219   | 0.219  | 6.972   | 7.389   |
| 1578 | ENSG00000151292 | CSNK1G3  | -1.1 | 0.0963225 | 0.2077407 | 34.383  | 0.713  | 33.818  | 35.184  | 37.353  | 1.832  | 35.300  | 38.818  |
| 1579 | ENSG00000101266 | CSNK2A1  | -1.1 | 0.0001952 | 0.0015633 | 97.267  | 2.412  | 94.487  | 98.798  | 110.949 | 3.817  | 108.738 | 115.356 |
| 1580 | ENSG00000254598 | CSNK2A3  | -1.2 | 5.275E-05 | 0.0005346 | 159.982 | 6.335  | 152.667 | 163.715 | 188.568 | 6.193  | 184.251 | 195.664 |
| 1581 | ENSG00000173546 | CSPG4    | -1.1 | 0.122222  | 0.2463227 | 4.487   | 0.151  | 4.385   | 4.660   | 5.042   | 0.466  | 4.552   | 5.481   |
| 1582 | ENSG00000114646 | CSPG5    | 1.3  | 0.0745037 | 0.1716031 | 1.527   | 0.189  | 1.320   | 1.691   | 1.227   | 0.073  | 1.147   | 1.290   |
| 1583 | ENSG00000144655 | CSRNP1   | 1.3  | 0.0005985 | 0.0038771 | 9.324   | 0.384  | 8.993   | 9.745   | 7.409   | 0.394  | 6.958   | 7.689   |
| 1584 | ENSG00000159176 | CSRNP1   | 1.6  | 2.31E-12  | 2.358E-10 | 10.290  | 0.485  | 9.945   | 10.844  | 6.637   | 0.619  | 5.945   | 7.139   |
| 1585 | ENSG00000160213 | CSTB     | 1.2  | 1.269E-05 | 0.0001635 | 41.218  | 2.240  | 38.934  | 43.412  | 35.338  | 0.669  | 34.565  | 35.731  |
| 1586 | ENSG00000101138 | CSTF1    | -1.1 | 0.0344458 | 0.0957879 | 22.962  | 1.062  | 22.223  | 24.179  | 25.599  | 0.971  | 24.977  | 26.718  |
| 1587 | ENSG00000176102 | CSTF3    | -1.3 | 3.626E-10 | 2.017E-08 | 42.464  | 2.412  | 40.263  | 45.042  | 57.619  | 2.086  | 55.869  | 59.927  |
| 1588 | ENSG00000117151 | CTBS     | 1.2  | 0.0241978 | 0.0731149 | 3.493   | 0.165  | 3.306   | 3.617   | 2.965   | 0.392  | 2.619   | 3.391   |
| 1589 | ENSG00000178971 | CTC1     | 1.2  | 0.0028062 | 0.0133657 | 7.734   | 0.810  | 6.909   | 8.529   | 6.550   | 0.560  | 5.904   | 6.886   |
| 1590 | ENSG00000102974 | CTCF     | -1.1 | 8.507E-05 | 0.0007909 | 59.176  | 3.135  | 56.813  | 62.732  | 69.207  | 0.831  | 68.316  | 69.960  |
| 1591 | ENSG00000124092 | CTCFL    | -1.4 | 6.401E-06 | 9.121E-05 | 3.635   | 0.596  | 2.993   | 4.172   | 5.345   | 0.578  | 4.712   | 5.845   |
| 1593 | ENSG00000144579 | CTDSP1   | -1.1 | 0.0276712 | 0.0809835 | 8.878   | 0.054  | 8.825   | 8.933   | 10.409  | 0.909  | 9.497   | 11.316  |
| 1594 | ENSG00000175215 | CTDSP2   | -1.1 | 0.0268081 | 0.0790592 | 86.273  | 4.369  | 81.297  | 89.481  | 94.304  | 4.810  | 89.531  | 99.150  |
| 1595 | ENSG00000144677 | CTDSPL   | 1.1  | 0.00653   | 0.0260231 | 31.075  | 1.542  | 29.645  | 32.708  | 28.492  | 1.020  | 27.659  | 29.628  |
| 1596 | ENSG00000118523 | CTGF     | 1.6  | 0.0008769 | 0.0052499 | 225.730 | 15.362 | 208.937 | 239.074 | 147.614 | 28.513 | 115.064 | 168.171 |
| 1597 | ENSG00000116761 | CTH      | 1.2  | 0.0001631 | 0.0013543 | 33.983  | 1.725  | 32.232  | 35.680  | 28.874  | 1.006  | 27.856  | 29.867  |
| 1598 | ENSG00000164932 | CTHRC1   | 1.5  | 0.0025014 | 0.0121847 | 5.365   | 0.330  | 5.117   | 5.740   | 3.578   | 0.462  | 3.101   | 4.022   |
| 1599 | ENSG00000134030 | CTIF     | -1.4 | 6.809E-06 | 9.605E-05 | 4.382   | 0.332  | 4.083   | 4.739   | 6.093   | 0.571  | 5.560   | 6.696   |
| 1600 | ENSG00000044115 | CTNNA1   | -1   | 0.0943095 | 0.2049674 | 184.334 | 4.330  | 179.774 | 188.389 | 195.932 | 2.082  | 193.586 | 197.562 |
| 1603 | ENSG00000066032 | CTNNA2   | -1.3 | 0.0002471 | 0.0018931 | 4.135   | 0.110  | 4.017   | 4.235   | 5.344   | 0.165  | 5.194   | 5.521   |

|      | A               | B             | C    | D         | E         | F       | G     | H       | I       | J       | K     | L       | M       |
|------|-----------------|---------------|------|-----------|-----------|---------|-------|---------|---------|---------|-------|---------|---------|
| 1605 | ENSG00000183230 | CTNNA3        | -2   | 0.0001575 | 0.0013102 | 0.253   | 0.049 | 0.199   | 0.294   | 0.510   | 0.046 | 0.474   | 0.562   |
| 1607 | ENSG00000119326 | CTNNAL1       | 1.1  | 0.0003358 | 0.0024149 | 97.900  | 1.539 | 96.496  | 99.545  | 89.622  | 1.662 | 87.734  | 90.868  |
| 1608 | ENSG00000168036 | CTNNB1        | -1.1 | 7.953E-05 | 0.0007498 | 162.289 | 2.473 | 160.070 | 164.956 | 185.434 | 6.360 | 181.421 | 192.768 |
| 1609 | ENSG00000198561 | CTNND1        | 1.1  | 0.0067791 | 0.0267839 | 122.331 | 6.171 | 115.206 | 125.977 | 116.107 | 3.234 | 112.646 | 119.052 |
| 1610 | ENSG00000169862 | CTNND2        | -1.4 | 2.575E-05 | 0.0002937 | 3.612   | 0.446 | 3.098   | 3.886   | 5.132   | 0.333 | 4.843   | 5.496   |
| 1611 | ENSG00000040531 | CTNS          | 1.2  | 0.0334762 | 0.0938009 | 8.237   | 1.464 | 7.174   | 9.907   | 7.100   | 0.487 | 6.581   | 7.548   |
| 1613 | ENSG00000047230 | CTPS2         | 1.1  | 0.0014698 | 0.0079578 | 66.229  | 3.067 | 62.702  | 68.266  | 61.198  | 1.561 | 59.486  | 62.543  |
| 1614 | ENSG00000198730 | CTR9          | -1.1 | 0.0035545 | 0.0161475 | 41.192  | 1.473 | 39.731  | 42.676  | 46.281  | 0.818 | 45.680  | 47.212  |
| 1616 | ENSG00000064601 | CTSA          | 1.2  | 0.0005373 | 0.0035471 | 13.699  | 0.739 | 13.001  | 14.472  | 11.805  | 0.239 | 11.538  | 11.998  |
| 1617 | ENSG00000109861 | CTSC          | 1.1  | 0.0027323 | 0.0130949 | 91.878  | 1.602 | 90.227  | 93.427  | 86.904  | 0.999 | 86.026  | 87.991  |
| 1618 | ENSG00000117984 | CTSD          | 1.1  | 0.0154236 | 0.0515939 | 42.892  | 1.766 | 40.892  | 44.237  | 39.354  | 2.747 | 36.217  | 41.326  |
| 1619 | ENSG00000174080 | CTSF          | 1.2  | 3.388E-05 | 0.0003692 | 35.371  | 3.375 | 32.833  | 39.201  | 28.930  | 1.344 | 27.430  | 30.027  |
| 1620 | ENSG00000103811 | CTSH          | 1.1  | 0.0593293 | 0.1444209 | 9.828   | 0.839 | 9.204   | 10.782  | 9.040   | 0.732 | 8.224   | 9.636   |
| 1621 | ENSG00000135047 | CTSL          | 1.1  | 0.0080385 | 0.0307136 | 52.747  | 2.461 | 50.375  | 55.289  | 48.384  | 1.619 | 46.536  | 49.551  |
| 1622 | ENSG00000256043 | CTSO          | 1.3  | 0.0194318 | 0.0615681 | 2.943   | 0.252 | 2.751   | 3.228   | 2.218   | 0.496 | 1.695   | 2.681   |
| 1623 | ENSG00000136943 | CTSV          | -1.1 | 0.1182896 | 0.2403451 | 34.264  | 1.109 | 33.125  | 35.340  | 37.155  | 1.929 | 34.940  | 38.461  |
| 1624 | ENSG00000085733 | CTTN          | 1.1  | 0.001093  | 0.0063244 | 69.665  | 2.643 | 66.978  | 72.261  | 64.715  | 1.357 | 63.715  | 66.260  |
| 1625 | ENSG00000143079 | CTTNBP2N<br>L | 1.1  | 0.118747  | 0.2409559 | 15.251  | 0.203 | 15.115  | 15.484  | 14.654  | 0.705 | 13.840  | 15.082  |
| 1626 | ENSG00000142544 | CTU1          | -1.2 | 0.1081477 | 0.2257035 | 3.359   | 0.461 | 2.901   | 3.823   | 4.260   | 1.187 | 3.438   | 5.620   |
| 1627 | ENSG00000174177 | CTU2          | -1.1 | 0.1170003 | 0.2385326 | 13.213  | 0.761 | 12.716  | 14.089  | 14.753  | 1.534 | 13.277  | 16.340  |
| 1628 | ENSG00000107874 | CUEDC2        | -1.1 | 0.0293042 | 0.0847051 | 64.984  | 4.845 | 61.000  | 70.378  | 73.439  | 3.283 | 70.088  | 76.649  |
| 1629 | ENSG00000055130 | CUL1          | 1.1  | 0.0821352 | 0.1852452 | 80.757  | 3.503 | 77.054  | 84.018  | 78.259  | 1.268 | 76.921  | 79.444  |
| 1630 | ENSG00000108094 | CUL2          | -1.1 | 0.0244796 | 0.0737485 | 33.542  | 1.203 | 32.333  | 34.738  | 37.043  | 1.049 | 35.845  | 37.801  |
| 1631 | ENSG00000044090 | CUL7          | -1.4 | 3.157E-10 | 1.804E-08 | 23.130  | 1.704 | 21.354  | 24.751  | 33.230  | 1.960 | 31.236  | 35.154  |
| 1632 | ENSG00000112514 | CUTA          | 1.2  | 3.026E-07 | 7.07E-06  | 131.576 | 2.980 | 129.228 | 134.928 | 110.594 | 2.021 | 108.629 | 112.667 |
| 1633 | ENSG00000119929 | CUTC          | 1.2  | 0.004706  | 0.0201816 | 43.441  | 3.124 | 40.386  | 46.629  | 38.553  | 1.428 | 37.238  | 40.072  |
| 1636 | ENSG00000138161 | CUZD1         | -2.4 | 2.55E-16  | 6.73E-14  | 6.371   | 0.210 | 6.223   | 6.611   | 15.504  | 0.918 | 14.493  | 16.284  |
| 1638 | ENSG00000150316 | CWC15         | 1.1  | 0.0140117 | 0.0477878 | 46.835  | 1.322 | 45.343  | 47.861  | 43.428  | 1.720 | 41.453  | 44.597  |
| 1639 | ENSG00000273559 | CWC25         | -1.1 | 0.0626445 | 0.1506479 | 13.398  | 0.465 | 12.930  | 13.860  | 15.054  | 0.455 | 14.529  | 15.323  |
| 1641 | ENSG00000153015 | CWC27         | -1.2 | 4.538E-05 | 0.0004728 | 52.754  | 0.598 | 52.064  | 53.136  | 62.180  | 1.743 | 60.376  | 63.854  |
| 1642 | ENSG00000006210 | CX3CL1        | 2.3  | 3.13E-13  | 3.78E-11  | 6.579   | 0.778 | 5.725   | 7.246   | 2.864   | 0.214 | 2.674   | 3.096   |
| 1645 | ENSG00000145824 | CXCL14        | -1.8 | 0.0052036 | 0.0217734 | 4.444   | 2.259 | 2.414   | 6.878   | 8.108   | 1.560 | 6.969   | 9.886   |
| 1647 | ENSG00000163734 | CXCL3         | -1.2 | 0.1151301 | 0.235738  | 3.204   | 0.016 | 3.194   | 3.223   | 3.919   | 0.273 | 3.610   | 4.129   |
| 1648 | ENSG00000163735 | CXCL5         | 1.2  | 0.0130979 | 0.0453067 | 48.982  | 2.606 | 46.860  | 51.891  | 42.459  | 7.126 | 37.220  | 50.573  |
| 1650 | ENSG00000180871 | CXCR2         | 1.7  | 0.0320752 | 0.0909726 | 0.794   | 0.367 | 0.461   | 1.188   | 0.477   | 0.078 | 0.387   | 0.529   |
| 1654 | ENSG00000121966 | CXCR4         | -2.3 | 0.0274699 | 0.0805361 | 0.200   | 0.116 | 0.066   | 0.268   | 0.480   | 0.104 | 0.419   | 0.600   |
| 1655 | ENSG00000185753 | CXorf38       | -1.1 | 0.0913294 | 0.2004898 | 8.456   | 0.203 | 8.283   | 8.679   | 9.493   | 0.984 | 8.357   | 10.080  |
| 1657 | ENSG00000147231 | CXorf57       | 1.9  | 2.00E-11  | 1.564E-09 | 7.954   | 0.625 | 7.429   | 8.646   | 4.205   | 0.127 | 4.061   | 4.299   |
| 1658 | ENSG00000154832 | CXXC1         | -1.1 | 0.1114728 | 0.2305099 | 19.110  | 2.783 | 16.067  | 21.525  | 21.172  | 0.238 | 20.930  | 21.407  |
| 1659 | ENSG00000162144 | CYB561A3      | -1.1 | 0.0929479 | 0.2025548 | 4.157   | 0.163 | 4.054   | 4.344   | 4.659   | 0.092 | 4.572   | 4.756   |
| 1660 | ENSG00000174151 | CYB561D1      | 1.1  | 0.0890388 | 0.1964919 | 5.459   | 0.526 | 4.852   | 5.790   | 4.931   | 0.410 | 4.487   | 5.295   |

|      | A               | B         | C    | D         | E         | F       | G      | H       | I       | J       | K      | L       | M       |
|------|-----------------|-----------|------|-----------|-----------|---------|--------|---------|---------|---------|--------|---------|---------|
| 1662 | ENSG00000166347 | CYB5A     | -1.1 | 0.1069373 | 0.2238365 | 23.082  | 1.407  | 21.733  | 24.541  | 24.908  | 0.907  | 23.863  | 25.482  |
| 1665 | ENSG00000103018 | CYB5B     | 1.2  | 4.671E-06 | 6.991E-05 | 37.936  | 1.004  | 37.026  | 39.013  | 32.999  | 0.992  | 31.855  | 33.634  |
| 1666 | ENSG00000100243 | CYB5R3    | 1.1  | 0.0539601 | 0.134705  | 40.337  | 2.097  | 38.512  | 42.628  | 38.483  | 1.819  | 36.825  | 40.429  |
| 1667 | ENSG00000215883 | CYB5RL    | 1.1  | 0.1151916 | 0.2357541 | 7.023   | 0.485  | 6.493   | 7.443   | 6.585   | 0.499  | 6.045   | 7.030   |
| 1669 | ENSG00000051523 | CYBA      | -1.1 | 0.0400577 | 0.1070801 | 34.814  | 1.053  | 33.623  | 35.625  | 38.696  | 2.603  | 37.055  | 41.697  |
| 1670 | ENSG00000071967 | CYBRD1    | 1.2  | 0.0058444 | 0.0239149 | 7.148   | 0.669  | 6.760   | 7.921   | 6.062   | 0.179  | 5.900   | 6.255   |
| 1671 | ENSG00000179091 | CYC1      | -1.1 | 0.0147428 | 0.0497693 | 115.344 | 0.983  | 114.662 | 116.471 | 127.948 | 7.625  | 122.609 | 136.681 |
| 1672 | ENSG00000055163 | CYFIP2    | 1.1  | 0.0195552 | 0.0618873 | 26.523  | 0.291  | 26.201  | 26.769  | 25.184  | 0.761  | 24.656  | 26.057  |
| 1674 | ENSG00000187954 | CYHR1     | -1.2 | 0.0006506 | 0.0041432 | 10.806  | 0.174  | 10.681  | 11.005  | 12.856  | 0.875  | 12.226  | 13.855  |
| 1675 | ENSG00000083799 | CYLD      | 1.2  | 0.0069096 | 0.0272215 | 5.731   | 0.359  | 5.394   | 6.109   | 5.073   | 0.309  | 4.728   | 5.324   |
| 1676 | ENSG00000140459 | CYP11A1   | -1.4 | 0.0005224 | 0.0034706 | 4.370   | 0.064  | 4.317   | 4.441   | 6.144   | 0.267  | 5.958   | 6.450   |
| 1677 | ENSG00000138061 | CYP1B1    | 1.7  | 1.218E-08 | 4.409E-07 | 7.012   | 0.445  | 6.506   | 7.345   | 4.184   | 0.246  | 4.031   | 4.468   |
| 1678 | ENSG00000095596 | CYP26A1   | -1.8 | 7.112E-05 | 0.0006844 | 2.508   | 0.660  | 1.937   | 3.231   | 4.487   | 0.665  | 3.762   | 5.069   |
| 1679 | ENSG00000003137 | CYP26B1   | -2   | 0.0298438 | 0.0859147 | 0.207   | 0.106  | 0.118   | 0.324   | 0.429   | 0.225  | 0.217   | 0.666   |
| 1681 | ENSG00000135929 | CYP27A1   | 1.3  | 0.0007741 | 0.0047365 | 14.104  | 0.492  | 13.661  | 14.634  | 11.266  | 0.462  | 10.829  | 11.749  |
| 1682 | ENSG00000197408 | CYP2B6    | 1.8  | 0.0162323 | 0.0537282 | 1.086   | 0.485  | 0.803   | 1.646   | 0.631   | 0.319  | 0.296   | 0.930   |
| 1683 | ENSG00000138115 | CYP2C8    | 2.2  | 0.0021742 | 0.0108153 | 1.094   | 0.246  | 0.811   | 1.263   | 0.498   | 0.170  | 0.302   | 0.608   |
| 1685 | ENSG00000205702 | CYP2D7    | -1.7 | 0.0123928 | 0.0432914 | 0.877   | 0.203  | 0.753   | 1.111   | 1.504   | 0.196  | 1.317   | 1.707   |
| 1686 | ENSG00000186104 | CYP2R1    | 1.3  | 5.828E-05 | 0.0005812 | 13.676  | 0.422  | 13.229  | 14.067  | 11.174  | 0.370  | 10.832  | 11.567  |
| 1687 | ENSG00000167600 | CYP2S1    | 1.1  | 0.0379666 | 0.1028063 | 195.230 | 4.751  | 190.249 | 199.711 | 186.751 | 13.211 | 173.623 | 200.043 |
| 1688 | ENSG00000155016 | CYP2U1    | 1.1  | 0.0236243 | 0.0717855 | 7.693   | 0.692  | 7.112   | 8.458   | 6.864   | 0.221  | 6.722   | 7.118   |
| 1689 | ENSG00000146233 | CYP39A1   | 1.3  | 0.0598974 | 0.1454479 | 2.285   | 0.050  | 2.231   | 2.327   | 1.805   | 0.339  | 1.609   | 2.196   |
| 1690 | ENSG00000171903 | CYP4F11   | 3.3  | 1.046E-07 | 2.839E-06 | 3.873   | 1.049  | 3.080   | 5.063   | 1.206   | 0.264  | 0.926   | 1.450   |
| 1691 | ENSG00000145476 | CYP4V2    | -1.2 | 0.0847916 | 0.1895927 | 1.058   | 0.110  | 0.949   | 1.170   | 1.303   | 0.099  | 1.191   | 1.378   |
| 1694 | ENSG00000001630 | CYP51A1   | 1.9  | 1.509E-08 | 5.328E-07 | 6.047   | 0.294  | 5.835   | 6.382   | 3.284   | 0.290  | 3.050   | 3.609   |
| 1695 | ENSG00000241095 | CYP51A1P1 | 1.8  | 1.152E-07 | 3.086E-06 | 12.158  | 1.102  | 11.188  | 13.357  | 6.902   | 0.722  | 6.110   | 7.523   |
| 1696 | ENSG00000233588 | CYP51A1P2 | 1.8  | 2.456E-10 | 1.448E-08 | 20.288  | 0.491  | 19.746  | 20.701  | 11.614  | 0.968  | 10.653  | 12.590  |
| 1698 | ENSG00000142871 | CYR61     | 1.9  | 0.0001435 | 0.0012147 | 219.201 | 20.569 | 202.996 | 242.341 | 117.570 | 22.874 | 94.129  | 139.832 |
| 1699 | ENSG00000197191 | CYSRT1    | -1.4 | 0.0913713 | 0.2005033 | 1.978   | 0.340  | 1.608   | 2.277   | 2.847   | 1.075  | 2.059   | 4.071   |
| 1700 | ENSG00000120306 | CYSTM1    | 1.2  | 0.001903  | 0.0097874 | 31.429  | 1.574  | 30.479  | 33.245  | 27.348  | 1.061  | 26.198  | 28.288  |
| 1701 | ENSG00000108669 | CYTH1     | -1.2 | 0.0001079 | 0.0009603 | 7.507   | 0.230  | 7.340   | 7.769   | 9.449   | 0.317  | 9.253   | 9.814   |
| 1702 | ENSG00000105443 | CYTH2     | -1.2 | 3.909E-05 | 0.0004171 | 8.877   | 0.249  | 8.617   | 9.114   | 11.020  | 0.616  | 10.403  | 11.636  |
| 1703 | ENSG00000222041 | CYTOR     | 1.6  | 5.054E-07 | 1.092E-05 | 7.215   | 0.616  | 6.509   | 7.647   | 4.487   | 0.827  | 3.572   | 5.183   |
| 1704 | ENSG00000166265 | CYYR1     | 1.1  | 0.0424597 | 0.1118768 | 26.349  | 0.183  | 26.139  | 26.463  | 24.699  | 1.288  | 23.680  | 26.146  |
| 1705 | ENSG00000180902 | D2HGDH    | -1.2 | 0.0015414 | 0.0082866 | 6.959   | 0.459  | 6.433   | 7.276   | 8.810   | 0.204  | 8.599   | 9.006   |
| 1706 | ENSG00000146122 | DAAM2     | -1.4 | 0.0047046 | 0.0201816 | 0.507   | 0.043  | 0.467   | 0.552   | 0.725   | 0.047  | 0.696   | 0.779   |
| 1707 | ENSG00000173406 | DAB1      | -1.4 | 9.779E-05 | 0.0008873 | 2.473   | 0.207  | 2.271   | 2.684   | 3.477   | 0.282  | 3.210   | 3.771   |
| 1708 | ENSG00000153071 | DAB2      | 1.3  | 0.0128318 | 0.0445177 | 1.829   | 0.113  | 1.699   | 1.895   | 1.472   | 0.206  | 1.338   | 1.708   |
| 1709 | ENSG00000136848 | DAB2IP    | -1.1 | 0.0013912 | 0.0076169 | 17.079  | 1.046  | 15.874  | 17.755  | 20.002  | 1.361  | 19.035  | 21.559  |

|      | A               | B        | C    | D         | E         | F       | G     | H       | I       | J       | K     | L       | M       |
|------|-----------------|----------|------|-----------|-----------|---------|-------|---------|---------|---------|-------|---------|---------|
| 1713 | ENSG00000197380 | DACT3    | -1.7 | 0.0002135 | 0.0016777 | 1.161   | 0.303 | 0.826   | 1.417   | 1.998   | 0.316 | 1.806   | 2.363   |
| 1714 | ENSG00000164535 | DAGLB    | -1.1 | 0.034797  | 0.0965105 | 6.948   | 0.180 | 6.746   | 7.092   | 8.080   | 0.415 | 7.828   | 8.559   |
| 1715 | ENSG00000226950 | DANCR    | -1.1 | 0.0005349 | 0.0035352 | 112.212 | 1.315 | 110.886 | 113.516 | 129.535 | 1.752 | 127.521 | 130.696 |
| 1716 | ENSG00000229335 | DANT1    | -1.2 | 0.073443  | 0.1699021 | 17.674  | 2.605 | 14.731  | 19.685  | 22.390  | 2.419 | 20.416  | 25.089  |
| 1718 | ENSG00000196730 | DAPK1    | -1.2 | 4.504E-07 | 9.893E-06 | 41.632  | 1.099 | 40.646  | 42.816  | 50.224  | 1.656 | 48.332  | 51.413  |
| 1720 | ENSG00000035664 | DAPK2    | -1.4 | 0.0551721 | 0.1370027 | 0.257   | 0.041 | 0.228   | 0.304   | 0.363   | 0.026 | 0.333   | 0.380   |
| 1721 | ENSG00000167657 | DAPK3    | 1.3  | 2.76E-06  | 4.474E-05 | 36.823  | 1.127 | 35.934  | 38.090  | 29.872  | 0.836 | 29.187  | 30.804  |
| 1722 | ENSG00000115866 | DARS     | -1.1 | 0.0002405 | 0.0018526 | 95.817  | 3.400 | 92.862  | 99.533  | 109.673 | 4.885 | 106.186 | 115.256 |
| 1724 | ENSG00000231890 | DARS-AS1 | -2.1 | 0.0504423 | 0.1278866 | 0.075   | 0.013 | 0.068   | 0.090   | 0.160   | 0.074 | 0.076   | 0.214   |
| 1725 | ENSG00000117593 | DARS2    | 1.1  | 0.0060357 | 0.0244802 | 50.592  | 0.940 | 49.540  | 51.349  | 47.061  | 1.454 | 45.830  | 48.665  |
| 1726 | ENSG00000204209 | DAXX     | -1.1 | 0.0004378 | 0.0029988 | 32.608  | 0.262 | 32.409  | 32.905  | 38.312  | 1.556 | 37.380  | 40.109  |
| 1728 | ENSG00000006634 | DBF4     | 1.2  | 1.524E-05 | 0.0001888 | 36.551  | 0.845 | 35.580  | 37.120  | 30.890  | 0.703 | 30.423  | 31.699  |
| 1731 | ENSG00000161692 | DBF4B    | -1.1 | 0.0234783 | 0.071496  | 12.406  | 1.477 | 11.383  | 14.100  | 14.180  | 0.408 | 13.709  | 14.423  |
| 1732 | ENSG00000235489 | DBF4P1   | 1.3  | 0.0002419 | 0.0018604 | 21.140  | 0.939 | 20.055  | 21.694  | 16.984  | 0.490 | 16.540  | 17.509  |
| 1734 | ENSG00000155368 | DBI      | 1.3  | 1.364E-09 | 6.443E-08 | 155.472 | 3.383 | 152.745 | 159.258 | 124.433 | 7.757 | 116.193 | 131.593 |
| 1735 | ENSG00000113758 | DBN1     | -1.1 | 0.1045813 | 0.2202993 | 121.090 | 2.042 | 118.745 | 122.471 | 130.256 | 7.239 | 123.886 | 138.129 |
| 1736 | ENSG00000003249 | DBNDD1   | -1.1 | 0.0361844 | 0.099284  | 25.219  | 1.243 | 23.791  | 26.057  | 28.092  | 1.021 | 26.961  | 28.946  |
| 1737 | ENSG00000136279 | DBNL     | 1.3  | 4.856E-05 | 0.0005008 | 5.837   | 0.181 | 5.677   | 6.033   | 4.739   | 0.519 | 4.150   | 5.133   |
| 1738 | ENSG00000137992 | DBT      | 1.1  | 0.0598973 | 0.1454479 | 20.674  | 0.400 | 20.430  | 21.135  | 19.896  | 0.392 | 19.593  | 20.339  |
| 1739 | ENSG00000122741 | DCAF10   | -1.1 | 0.0163415 | 0.0539737 | 11.359  | 0.591 | 10.755  | 11.935  | 12.948  | 0.960 | 12.052  | 13.960  |
| 1740 | ENSG00000198876 | DCAF12   | -1.1 | 0.0541734 | 0.135072  | 32.910  | 1.269 | 31.446  | 33.687  | 36.066  | 0.566 | 35.412  | 36.419  |
| 1742 | ENSG00000198889 | DCAF12L1 | 1.3  | 0.0164937 | 0.0543884 | 3.359   | 0.411 | 3.102   | 3.833   | 2.642   | 0.106 | 2.571   | 2.763   |
| 1746 | ENSG00000164934 | DCAF13   | -1.1 | 0.0003543 | 0.0025281 | 43.151  | 3.458 | 40.757  | 47.115  | 50.021  | 2.632 | 48.013  | 53.001  |
| 1748 | ENSG00000242562 | DCAF13P1 | -1.3 | 0.077694  | 0.1773332 | 3.193   | 0.481 | 2.666   | 3.608   | 4.377   | 0.542 | 3.763   | 4.787   |
| 1749 | ENSG00000119599 | DCAF4    | 1.3  | 0.0012914 | 0.0071993 | 5.706   | 0.206 | 5.526   | 5.930   | 4.471   | 0.880 | 3.558   | 5.315   |
| 1751 | ENSG00000136485 | DCAF7    | -1.1 | 0.0102397 | 0.037172  | 76.117  | 1.869 | 73.991  | 77.499  | 83.559  | 2.918 | 80.283  | 85.880  |
| 1752 | ENSG00000132716 | DCAF8    | -1.1 | 0.1185441 | 0.240801  | 29.231  | 1.001 | 28.529  | 30.377  | 31.485  | 1.291 | 30.421  | 32.921  |
| 1753 | ENSG00000172992 | DCAKD    | 1.1  | 0.0458818 | 0.1189634 | 33.699  | 2.411 | 30.946  | 35.433  | 31.439  | 1.118 | 30.629  | 32.715  |
| 1754 | ENSG00000164465 | DCBLD1   | 1.2  | 0.0271388 | 0.0798035 | 4.062   | 0.195 | 3.943   | 4.287   | 3.558   | 0.399 | 3.097   | 3.807   |
| 1755 | ENSG00000057019 | DCBLD2   | 1.2  | 6.221E-06 | 8.894E-05 | 28.556  | 1.364 | 27.546  | 30.108  | 24.942  | 0.334 | 24.573  | 25.224  |
| 1756 | ENSG00000146038 | DCDC2    | 2    | 1.674E-06 | 2.91E-05  | 2.273   | 0.153 | 2.117   | 2.423   | 1.166   | 0.316 | 0.839   | 1.470   |
| 1757 | ENSG00000166341 | DCHS1    | 1.1  | 0.0406739 | 0.1084058 | 5.940   | 0.275 | 5.637   | 6.173   | 5.383   | 0.824 | 4.465   | 6.058   |
| 1759 | ENSG00000133083 | DCLK1    | 2.4  | 6.38E-25  | 1.90E-21  | 37.311  | 2.692 | 34.788  | 40.144  | 16.092  | 0.548 | 15.493  | 16.567  |
| 1764 | ENSG00000163673 | DCLK3    | 1.5  | 0.0353573 | 0.0976483 | 0.567   | 0.070 | 0.504   | 0.641   | 0.382   | 0.043 | 0.334   | 0.419   |
| 1767 | ENSG00000198924 | DCLRE1A  | 1.1  | 0.0445807 | 0.1162314 | 22.260  | 0.631 | 21.808  | 22.981  | 20.718  | 2.149 | 18.292  | 22.383  |
| 1769 | ENSG00000152457 | DCLRE1C  | 1.4  | 0.0093005 | 0.0343224 | 1.900   | 0.074 | 1.845   | 1.984   | 1.434   | 0.168 | 1.271   | 1.607   |
| 1770 | ENSG00000151065 | DCP1B    | -1.3 | 1.731E-07 | 4.409E-06 | 13.474  | 1.093 | 12.833  | 14.736  | 18.551  | 0.450 | 18.286  | 19.071  |
| 1774 | ENSG00000172795 | DCP2     | -1.1 | 8.087E-05 | 0.000759  | 62.898  | 1.552 | 61.599  | 64.616  | 73.096  | 2.610 | 70.104  | 74.907  |
| 1775 | ENSG00000129187 | DCTD     | 1.1  | 0.0008316 | 0.0050304 | 57.183  | 1.645 | 55.292  | 58.287  | 51.661  | 2.480 | 48.914  | 53.735  |
| 1780 | ENSG00000166847 | DCTN5    | 1.1  | 0.0281843 | 0.0822858 | 19.990  | 0.644 | 19.297  | 20.571  | 19.103  | 0.335 | 18.846  | 19.482  |
| 1783 | ENSG00000104671 | DCTN6    | -1.2 | 0.0098922 | 0.0361378 | 21.473  | 1.219 | 20.275  | 22.712  | 25.492  | 1.342 | 24.043  | 26.692  |
| 1785 | ENSG00000043093 | DCUN1D1  | 1.2  | 0.0005856 | 0.0038117 | 19.940  | 1.244 | 18.520  | 20.843  | 17.376  | 0.265 | 17.206  | 17.681  |
| 1786 | ENSG00000188215 | DCUN1D3  | -1.2 | 0.0092024 | 0.0340333 | 4.270   | 0.476 | 3.720   | 4.561   | 5.280   | 0.451 | 4.772   | 5.632   |



|      | A               | B       | C    | D         | E         | F       | G      | H       | I       | J       | K      | L       | M       |
|------|-----------------|---------|------|-----------|-----------|---------|--------|---------|---------|---------|--------|---------|---------|
| 1787 | ENSG00000109184 | DCUN1D4 | 1.1  | 0.0079309 | 0.0304209 | 15.895  | 0.524  | 15.319  | 16.343  | 14.473  | 0.613  | 13.768  | 14.883  |
| 1792 | ENSG00000137692 | DCUN1D5 | 1.1  | 0.0145989 | 0.0493998 | 113.292 | 1.896  | 111.301 | 115.076 | 107.021 | 2.058  | 104.879 | 108.984 |
| 1793 | ENSG00000077279 | DCX     | -1.3 | 0.000121  | 0.0010554 | 3.576   | 0.253  | 3.402   | 3.866   | 4.706   | 0.178  | 4.514   | 4.866   |
| 1794 | ENSG00000153904 | DDAH1   | 1.5  | 4.88E-14  | 7.37E-12  | 53.316  | 0.697  | 52.543  | 53.897  | 36.831  | 0.916  | 36.006  | 37.816  |
| 1795 | ENSG00000213722 | DDAH2   | -1.1 | 0.0153877 | 0.0515045 | 54.182  | 1.935  | 51.949  | 55.356  | 60.555  | 3.069  | 57.141  | 63.087  |
| 1797 | ENSG00000134574 | DDB2    | -1.5 | 1.17E-13  | 1.59E-11  | 53.503  | 1.300  | 52.116  | 54.692  | 80.693  | 6.455  | 73.701  | 86.425  |
| 1798 | ENSG00000085788 | DDHD2   | 1.2  | 0.0017084 | 0.009007  | 12.095  | 0.454  | 11.572  | 12.394  | 10.737  | 0.724  | 10.099  | 11.525  |
| 1799 | ENSG00000175197 | DDIT3   | 3    | 8.17E-16  | 1.84E-13  | 37.112  | 4.648  | 31.774  | 40.261  | 12.773  | 2.296  | 11.365  | 15.423  |
| 1800 | ENSG00000168209 | DDIT4   | 1.5  | 9.48E-13  | 1.041E-10 | 86.870  | 2.287  | 85.086  | 89.448  | 57.690  | 6.593  | 52.547  | 65.123  |
| 1801 | ENSG00000145358 | DDIT4L  | -1.1 | 0.103751  | 0.219014  | 4.864   | 0.358  | 4.628   | 5.277   | 5.712   | 0.241  | 5.485   | 5.965   |
| 1803 | ENSG00000244038 | DDOST   | -1   | 0.0790436 | 0.179928  | 216.862 | 2.125  | 214.766 | 219.015 | 232.292 | 2.391  | 229.724 | 234.455 |
| 1805 | ENSG00000204580 | DDR1    | 1.1  | 0.0008721 | 0.0052304 | 68.390  | 2.082  | 66.053  | 70.048  | 63.021  | 2.553  | 60.355  | 65.443  |
| 1806 | ENSG00000162733 | DDR2    | 3.2  | 7.00E-15  | 1.35E-12  | 2.176   | 0.089  | 2.119   | 2.279   | 0.684   | 0.078  | 0.599   | 0.753   |
| 1807 | ENSG00000198171 | DDRGK1  | -1.3 | 4.895E-05 | 0.0005042 | 37.949  | 2.826  | 34.758  | 40.135  | 48.649  | 3.958  | 44.250  | 51.924  |
| 1808 | ENSG00000099977 | DDT     | -1.1 | 0.0335607 | 0.0939444 | 43.286  | 0.637  | 42.561  | 43.754  | 49.643  | 0.949  | 48.787  | 50.663  |
| 1809 | ENSG00000099974 | DDTL    | -1.2 | 0.0117668 | 0.0415734 | 17.599  | 1.205  | 16.256  | 18.587  | 21.291  | 1.312  | 20.289  | 22.777  |
| 1810 | ENSG00000178105 | DDX10   | -1.1 | 0.0101724 | 0.0369832 | 20.139  | 0.792  | 19.413  | 20.984  | 22.724  | 1.275  | 21.264  | 23.614  |
| 1811 | ENSG00000013573 | DDX11   | 1.1  | 0.1066419 | 0.2233685 | 23.492  | 0.748  | 22.874  | 24.324  | 22.787  | 0.271  | 22.502  | 23.042  |
| 1812 | ENSG00000214826 | DDX12P  | -1.1 | 0.0759863 | 0.1741639 | 16.746  | 0.564  | 16.172  | 17.298  | 18.850  | 0.341  | 18.461  | 19.099  |
| 1813 | ENSG00000100201 | DDX17   | -1.1 | 0.0008006 | 0.0048687 | 302.558 | 14.130 | 287.867 | 316.051 | 338.609 | 6.085  | 331.685 | 343.104 |
| 1814 | ENSG00000064703 | DDX20   | 1.1  | 0.0098533 | 0.0360231 | 18.963  | 1.064  | 18.262  | 20.188  | 17.366  | 0.537  | 16.864  | 17.932  |
| 1815 | ENSG00000165732 | DDX21   | -1.1 | 0.0001895 | 0.0015281 | 203.484 | 15.567 | 190.861 | 220.879 | 233.243 | 7.218  | 225.525 | 239.825 |
| 1816 | ENSG00000174243 | DDX23   | -1.1 | 0.0001099 | 0.0009734 | 48.348  | 1.229  | 47.547  | 49.762  | 56.076  | 1.883  | 54.164  | 57.928  |
| 1817 | ENSG00000089737 | DDX24   | -1.1 | 0.0145818 | 0.0493718 | 46.415  | 1.245  | 45.682  | 47.853  | 50.918  | 2.155  | 49.255  | 53.352  |
| 1818 | ENSG00000109832 | DDX25   | 1.1  | 0.0631831 | 0.1516245 | 9.151   | 0.886  | 8.290   | 10.060  | 8.591   | 0.401  | 8.136   | 8.893   |
| 1819 | ENSG00000124228 | DDX27   | -1.1 | 0.0005541 | 0.0036368 | 34.120  | 0.408  | 33.761  | 34.564  | 39.359  | 0.551  | 38.932  | 39.981  |
| 1820 | ENSG00000182810 | DDX28   | -1.2 | 0.0216277 | 0.0670615 | 11.426  | 0.400  | 10.990  | 11.776  | 13.770  | 1.441  | 12.849  | 15.431  |
| 1821 | ENSG00000123136 | DDX39A  | 1.1  | 0.0511961 | 0.1293323 | 43.989  | 0.920  | 43.140  | 44.967  | 41.543  | 3.424  | 37.976  | 44.802  |
| 1822 | ENSG00000198563 | DDX39B  | -1.2 | 1.963E-08 | 6.637E-07 | 36.874  | 1.421  | 35.441  | 38.283  | 46.433  | 1.047  | 45.229  | 47.118  |
| 1823 | ENSG00000215301 | DDX3X   | -1.1 | 2.794E-06 | 4.505E-05 | 121.333 | 2.340  | 118.831 | 123.467 | 141.972 | 5.201  | 136.357 | 146.624 |
| 1824 | ENSG00000183258 | DDX41   | -1.1 | 0.024605  | 0.0740469 | 34.670  | 0.558  | 34.275  | 35.308  | 38.330  | 0.980  | 37.344  | 39.304  |
| 1825 | ENSG00000107625 | DDX50   | -1.1 | 0.0082032 | 0.0311988 | 83.327  | 1.857  | 81.199  | 84.620  | 92.803  | 2.135  | 91.068  | 95.187  |
| 1826 | ENSG00000278053 | DDX52   | 1.1  | 0.0014775 | 0.0079911 | 17.670  | 1.030  | 16.715  | 18.761  | 15.969  | 0.585  | 15.597  | 16.643  |
| 1827 | ENSG00000111364 | DDX55   | -1.1 | 0.0369945 | 0.100836  | 15.267  | 0.841  | 14.660  | 16.227  | 17.092  | 0.679  | 16.307  | 17.504  |
| 1828 | ENSG00000110367 | DDX6    | -1.1 | 0.0212027 | 0.0660528 | 62.577  | 4.283  | 57.631  | 65.078  | 68.432  | 1.128  | 67.479  | 69.677  |
| 1829 | ENSG00000181381 | DDX60L  | 1.4  | 0.0044812 | 0.0194283 | 1.004   | 0.059  | 0.944   | 1.061   | 0.737   | 0.093  | 0.630   | 0.792   |
| 1830 | ENSG00000104325 | DECR1   | 1.1  | 0.0244876 | 0.0737593 | 22.670  | 1.083  | 21.780  | 23.875  | 20.737  | 1.144  | 19.415  | 21.406  |
| 1831 | ENSG00000160570 | DEDD2   | -1.2 | 0.0001509 | 0.0012631 | 23.967  | 0.807  | 23.191  | 24.803  | 29.546  | 1.259  | 28.100  | 30.399  |
| 1832 | ENSG00000140995 | DEF8    | 1.1  | 0.009241  | 0.0341253 | 23.489  | 1.232  | 22.771  | 24.912  | 21.670  | 0.632  | 20.972  | 22.203  |
| 1833 | ENSG00000124795 | DEK     | -1.1 | 0.0414662 | 0.1099072 | 261.530 | 5.662  | 255.131 | 265.891 | 284.992 | 10.771 | 276.397 | 297.075 |
| 1834 | ENSG00000119522 | DENND1A | -1.1 | 0.0272651 | 0.0801058 | 9.898   | 0.629  | 9.191   | 10.394  | 11.326  | 0.819  | 10.463  | 12.093  |
| 1835 | ENSG00000205744 | DENND1C | -1.6 | 0.0003096 | 0.0022666 | 1.473   | 0.263  | 1.312   | 1.777   | 2.357   | 0.219  | 2.150   | 2.586   |
| 1836 | ENSG00000146966 | DENND2A | 1.4  | 2.562E-05 | 0.0002931 | 7.969   | 0.264  | 7.756   | 8.265   | 5.987   | 0.416  | 5.551   | 6.380   |

|      | A               | B         | C    | D         | E         | F       | G      | H       | I       | J       | K      | L       | M       |
|------|-----------------|-----------|------|-----------|-----------|---------|--------|---------|---------|---------|--------|---------|---------|
| 1837 | ENSG00000175984 | DENND2C   | 1.3  | 0.0066011 | 0.0262755 | 3.602   | 0.265  | 3.296   | 3.764   | 2.942   | 0.137  | 2.792   | 3.059   |
| 1838 | ENSG00000174485 | DENND4A   | 1.2  | 0.0234916 | 0.0715106 | 3.747   | 0.236  | 3.558   | 4.011   | 3.299   | 0.254  | 3.032   | 3.538   |
| 1839 | ENSG00000198837 | DENND4B   | -1.1 | 0.0693005 | 0.1625631 | 24.979  | 0.258  | 24.713  | 25.227  | 27.099  | 1.136  | 25.812  | 27.964  |
| 1840 | ENSG00000184014 | DENND5A   | 1.1  | 0.0392806 | 0.1054862 | 35.205  | 0.574  | 34.555  | 35.644  | 33.808  | 0.903  | 33.038  | 34.802  |
| 1841 | ENSG00000174839 | DENND6A   | 1.1  | 0.0531456 | 0.1330667 | 12.104  | 0.443  | 11.612  | 12.474  | 11.238  | 0.635  | 10.638  | 11.904  |
| 1842 | ENSG00000139726 | DENR      | 1.1  | 0.006767  | 0.0267588 | 106.104 | 1.131  | 105.260 | 107.389 | 100.506 | 1.770  | 98.539  | 101.971 |
| 1843 | ENSG00000024526 | DEPDC1    | -1.3 | 0.0003653 | 0.0025936 | 51.774  | 5.592  | 47.795  | 58.168  | 67.124  | 6.753  | 61.078  | 74.412  |
| 1846 | ENSG00000155792 | DEPTOR    | -1.4 | 0.004423  | 0.0192206 | 2.805   | 0.117  | 2.671   | 2.874   | 4.132   | 0.316  | 3.850   | 4.474   |
| 1847 | ENSG00000023697 | DERA      | 1.4  | 1.103E-06 | 2.074E-05 | 32.665  | 3.439  | 28.916  | 35.675  | 24.660  | 2.559  | 22.592  | 27.521  |
| 1848 | ENSG00000136986 | DERL1     | 1.1  | 0.0447789 | 0.1166583 | 22.405  | 0.533  | 22.054  | 23.018  | 21.319  | 0.876  | 20.791  | 22.330  |
| 1849 | ENSG00000100418 | DES11     | 1.2  | 4.31E-05  | 0.0004533 | 26.008  | 1.305  | 24.647  | 27.248  | 22.253  | 0.513  | 21.717  | 22.739  |
| 1850 | ENSG00000140543 | DET1      | -1.2 | 0.0219956 | 0.0678777 | 3.956   | 0.407  | 3.536   | 4.348   | 4.810   | 0.143  | 4.651   | 4.930   |
| 1851 | ENSG00000160049 | DFFA      | -1   | 0.0996994 | 0.2128254 | 49.695  | 0.802  | 48.773  | 50.221  | 53.317  | 1.911  | 51.125  | 54.640  |
| 1852 | ENSG00000105928 | DFNA5     | 1.3  | 0.0010185 | 0.0059641 | 3.496   | 0.039  | 3.452   | 3.520   | 2.759   | 0.246  | 2.532   | 3.020   |
| 1853 | ENSG00000204311 | DFNB59    | -1.3 | 0.0499825 | 0.1269278 | 3.540   | 0.510  | 3.186   | 4.125   | 4.588   | 0.141  | 4.426   | 4.689   |
| 1854 | ENSG00000185000 | DGAT1     | -1.2 | 0.0018405 | 0.0095371 | 9.333   | 0.556  | 8.692   | 9.686   | 11.531  | 0.740  | 10.786  | 12.267  |
| 1855 | ENSG00000062282 | DGAT2     | 1.2  | 0.0282617 | 0.0824547 | 2.268   | 0.284  | 1.942   | 2.469   | 1.872   | 0.247  | 1.710   | 2.157   |
| 1856 | ENSG00000070413 | DGCR2     | -1.1 | 0.0018083 | 0.0093959 | 26.462  | 0.643  | 25.788  | 27.070  | 30.730  | 2.640  | 28.677  | 33.707  |
| 1857 | ENSG00000183628 | DGCR6     | -1.3 | 0.0562938 | 0.1389833 | 1.105   | 0.084  | 1.052   | 1.203   | 1.459   | 0.169  | 1.343   | 1.653   |
| 1858 | ENSG00000128185 | DGCR6L    | 1.1  | 0.0436579 | 0.1144548 | 51.717  | 0.807  | 50.974  | 52.576  | 46.818  | 6.721  | 39.577  | 52.856  |
| 1861 | ENSG00000128191 | DGCR8     | -1.1 | 0.0008883 | 0.005301  | 14.863  | 0.226  | 14.602  | 15.011  | 17.458  | 0.382  | 17.202  | 17.897  |
| 1862 | ENSG00000136267 | DGKB      | -2   | 4.064E-07 | 9.056E-06 | 0.708   | 0.150  | 0.545   | 0.840   | 1.447   | 0.133  | 1.358   | 1.600   |
| 1863 | ENSG00000077044 | DGKD      | -1.1 | 0.0243625 | 0.0735265 | 8.899   | 0.273  | 8.694   | 9.210   | 10.082  | 0.359  | 9.718   | 10.436  |
| 1864 | ENSG00000153933 | DGKE      | -1.1 | 0.0496923 | 0.126402  | 5.088   | 0.490  | 4.688   | 5.635   | 5.779   | 0.309  | 5.440   | 6.045   |
| 1865 | ENSG00000102780 | DGKH      | 1.3  | 2.317E-06 | 3.841E-05 | 5.320   | 0.462  | 5.045   | 5.853   | 4.165   | 0.294  | 3.974   | 4.504   |
| 1866 | ENSG00000274588 | DGKK      | -1.2 | 0.0005998 | 0.0038836 | 5.793   | 0.433  | 5.326   | 6.179   | 7.392   | 0.516  | 6.877   | 7.908   |
| 1867 | ENSG00000179611 | DGKZP1    | -1.1 | 0.0806381 | 0.1824036 | 36.634  | 0.544  | 36.030  | 37.085  | 40.414  | 3.645  | 38.215  | 44.621  |
| 1868 | ENSG00000116133 | DHCR24    | 1.8  | 8.61E-23  | 1.04E-19  | 313.993 | 8.673  | 305.503 | 322.837 | 181.741 | 9.443  | 172.149 | 191.028 |
| 1869 | ENSG00000172893 | DHCR7     | 1.7  | 3.43E-14  | 5.42E-12  | 73.951  | 4.392  | 70.344  | 78.842  | 44.409  | 4.830  | 40.518  | 49.815  |
| 1870 | ENSG00000117682 | DHDDS     | 1.2  | 0.0012982 | 0.0072298 | 16.791  | 0.623  | 16.094  | 17.293  | 14.770  | 0.920  | 13.867  | 15.707  |
| 1871 | ENSG00000228716 | DHFR      | 1.3  | 9.31E-10  | 4.604E-08 | 59.293  | 2.624  | 56.376  | 61.460  | 45.718  | 3.491  | 42.835  | 49.600  |
| 1872 | ENSG00000188985 | DHFRP1    | 1.3  | 5.728E-06 | 8.366E-05 | 204.151 | 17.293 | 185.634 | 219.880 | 163.672 | 15.586 | 150.915 | 181.045 |
| 1873 | ENSG00000167536 | DHRS13    | -1.2 | 0.0087338 | 0.0326801 | 10.362  | 1.641  | 9.184   | 12.237  | 12.846  | 0.031  | 12.811  | 12.871  |
| 1874 | ENSG00000100867 | DHRS2     | 2    | 4.823E-05 | 0.0004977 | 0.869   | 0.075  | 0.789   | 0.939   | 0.450   | 0.035  | 0.411   | 0.476   |
| 1875 | ENSG00000162496 | DHRS3     | -1.1 | 0.0777305 | 0.1773701 | 8.034   | 0.224  | 7.830   | 8.273   | 9.309   | 0.675  | 8.645   | 9.994   |
| 1876 | ENSG00000157326 | DHRS4     | 1.2  | 0.0079817 | 0.0305416 | 9.486   | 0.762  | 8.750   | 10.271  | 7.861   | 0.424  | 7.451   | 8.298   |
| 1877 | ENSG00000215256 | DHRS4-AS1 | 1.1  | 0.0336798 | 0.0942166 | 11.548  | 0.736  | 10.802  | 12.274  | 10.374  | 0.812  | 9.750   | 11.292  |
| 1878 | ENSG00000100612 | DHRS7     | 1.2  | 0.001172  | 0.006683  | 20.147  | 1.627  | 19.059  | 22.017  | 17.215  | 0.698  | 16.420  | 17.727  |
| 1879 | ENSG00000169084 | DHRSX     | 1.3  | 0.0012456 | 0.0070106 | 10.832  | 1.199  | 9.462   | 11.688  | 8.681   | 1.428  | 7.192   | 10.039  |
| 1880 | ENSG00000181192 | DHTKD1    | -1.1 | 0.0666354 | 0.1578881 | 60.288  | 2.760  | 57.509  | 63.029  | 65.232  | 2.226  | 62.666  | 66.637  |
| 1881 | ENSG00000109606 | DHX15     | -1.2 | 3.4E-07   | 7.761E-06 | 131.566 | 4.224  | 127.909 | 136.189 | 156.035 | 1.900  | 153.987 | 157.740 |
| 1882 | ENSG00000067248 | DHX29     | 1.1  | 0.0251056 | 0.0751923 | 49.207  | 0.600  | 48.560  | 49.745  | 46.940  | 0.389  | 46.534  | 47.310  |

|      | A               | B          | C    | D         | E         | F       | G      | H       | I       | J       | K      | L       | M       |
|------|-----------------|------------|------|-----------|-----------|---------|--------|---------|---------|---------|--------|---------|---------|
| 1883 | ENSG00000132153 | DHX30      | -1.2 | 4.48E-06  | 6.748E-05 | 31.303  | 0.760  | 30.570  | 32.088  | 37.593  | 1.506  | 35.977  | 38.958  |
| 1884 | ENSG00000089876 | DHX32      | 1.3  | 3.43E-06  | 5.366E-05 | 29.884  | 2.500  | 28.227  | 32.760  | 23.850  | 1.714  | 21.950  | 25.278  |
| 1885 | ENSG00000005100 | DHX33      | -1.1 | 0.0118299 | 0.0417093 | 45.400  | 1.327  | 43.868  | 46.194  | 50.604  | 3.053  | 48.558  | 54.113  |
| 1886 | ENSG00000134815 | DHX34      | -1.2 | 0.0002899 | 0.0021532 | 13.845  | 1.901  | 12.502  | 16.021  | 17.497  | 2.004  | 16.332  | 19.811  |
| 1887 | ENSG00000163214 | DHX57      | 1.1  | 0.087362  | 0.1937267 | 16.997  | 1.309  | 15.486  | 17.808  | 16.183  | 0.901  | 15.215  | 16.998  |
| 1888 | ENSG00000067596 | DHX8       | -1.1 | 0.0701905 | 0.1641953 | 21.523  | 0.764  | 20.774  | 22.301  | 23.374  | 0.840  | 22.570  | 24.245  |
| 1889 | ENSG00000147202 | DIAPH2     | -1.2 | 1.973E-05 | 0.0002351 | 39.131  | 0.198  | 38.908  | 39.284  | 46.594  | 3.591  | 43.793  | 50.643  |
| 1890 | ENSG00000139734 | DIAPH3     | -1.1 | 0.0141041 | 0.0480607 | 17.729  | 1.110  | 16.850  | 18.977  | 20.029  | 1.134  | 19.041  | 21.266  |
| 1891 | ENSG00000235706 | DICER1-AS1 | -1.2 | 0.0033269 | 0.0153021 | 7.006   | 0.589  | 6.391   | 7.565   | 8.870   | 0.325  | 8.519   | 9.160   |
| 1892 | ENSG00000101191 | DIDO1      | 1.1  | 0.0235351 | 0.0715979 | 23.453  | 0.729  | 22.960  | 24.291  | 22.334  | 0.937  | 21.374  | 23.246  |
| 1893 | ENSG00000160305 | DIP2A      | -1.2 | 0.0004361 | 0.0029907 | 8.804   | 0.185  | 8.691   | 9.017   | 10.406  | 0.119  | 10.287  | 10.525  |
| 1894 | ENSG00000066084 | DIP2B      | -1.1 | 0.0943055 | 0.2049674 | 20.748  | 0.113  | 20.620  | 20.834  | 22.458  | 1.664  | 21.239  | 24.354  |
| 1896 | ENSG00000151240 | DIP2C      | -1.1 | 0.0843287 | 0.1889109 | 8.841   | 0.907  | 7.811   | 9.517   | 9.857   | 0.399  | 9.530   | 10.301  |
| 1897 | ENSG00000176490 | DIRAS1     | -1.2 | 0.0010734 | 0.0062344 | 14.281  | 1.236  | 13.006  | 15.473  | 17.802  | 1.672  | 15.953  | 19.208  |
| 1898 | ENSG00000138463 | DIRC2      | 1.2  | 0.0011556 | 0.006605  | 10.999  | 0.260  | 10.716  | 11.228  | 9.142   | 0.611  | 8.465   | 9.653   |
| 1899 | ENSG00000083520 | DIS3       | -1.1 | 0.0053619 | 0.0222814 | 24.283  | 0.701  | 23.698  | 25.059  | 27.227  | 0.573  | 26.862  | 27.888  |
| 1900 | ENSG00000166938 | DIS3L      | 1.1  | 0.0038144 | 0.0170759 | 16.202  | 0.602  | 15.622  | 16.823  | 14.535  | 0.286  | 14.306  | 14.856  |
| 1901 | ENSG00000144535 | DIS3L2     | 1.2  | 0.005309  | 0.0220992 | 5.737   | 0.267  | 5.532   | 6.039   | 5.057   | 0.049  | 5.000   | 5.086   |
| 1902 | ENSG00000204624 | DISP3      | -1.4 | 0.0009234 | 0.0054719 | 1.882   | 0.384  | 1.443   | 2.159   | 2.778   | 0.319  | 2.445   | 3.081   |
| 1903 | ENSG00000150764 | DIXDC1     | 1.1  | 0.00636   | 0.0254898 | 11.941  | 0.305  | 11.747  | 12.293  | 10.850  | 0.258  | 10.552  | 11.010  |
| 1904 | ENSG00000130826 | DKC1       | 1.1  | 0.0793991 | 0.1802592 | 113.891 | 3.247  | 110.737 | 117.224 | 110.793 | 3.670  | 107.875 | 114.913 |
| 1905 | ENSG00000050165 | DKK3       | 1.3  | 2.047E-07 | 5.061E-06 | 15.986  | 0.713  | 15.439  | 16.792  | 12.126  | 0.389  | 11.748  | 12.525  |
| 1906 | ENSG00000008226 | DLEC1      | 1.5  | 0.0593539 | 0.1444601 | 0.444   | 0.213  | 0.230   | 0.656   | 0.301   | 0.069  | 0.225   | 0.360   |
| 1907 | ENSG00000176124 | DLEU1      | -1.2 | 0.051845  | 0.1305426 | 1.750   | 0.161  | 1.571   | 1.882   | 2.098   | 0.331  | 1.888   | 2.479   |
| 1908 | ENSG00000231607 | DLEU2      | 1.4  | 0.0008761 | 0.005247  | 2.791   | 0.231  | 2.584   | 3.040   | 1.987   | 0.161  | 1.839   | 2.158   |
| 1910 | ENSG00000186047 | DLEU7      | -1.4 | 0.0566774 | 0.1395379 | 0.886   | 0.408  | 0.566   | 1.345   | 1.292   | 0.209  | 1.091   | 1.508   |
| 1911 | ENSG00000075711 | DLG1       | 1.1  | 0.0032553 | 0.0150317 | 21.642  | 1.099  | 20.382  | 22.400  | 20.017  | 0.753  | 19.278  | 20.783  |
| 1912 | ENSG00000082458 | DLG3       | -1.1 | 0.0531436 | 0.1330667 | 25.994  | 0.473  | 25.451  | 26.312  | 28.253  | 0.792  | 27.339  | 28.732  |
| 1913 | ENSG00000132535 | DLG4       | -1.3 | 3.926E-08 | 1.218E-06 | 14.658  | 0.504  | 14.183  | 15.186  | 19.863  | 1.142  | 18.892  | 21.122  |
| 1915 | ENSG00000151208 | DLG5       | 1.1  | 0.0021409 | 0.0106904 | 31.426  | 0.935  | 30.592  | 32.436  | 28.960  | 1.633  | 27.395  | 30.652  |
| 1916 | ENSG00000170579 | DLGAP1     | -1.5 | 1.839E-07 | 4.66E-06  | 3.344   | 0.122  | 3.212   | 3.451   | 4.975   | 0.604  | 4.297   | 5.459   |
| 1917 | ENSG00000177337 | DLGAP1-AS1 | 1.3  | 0.0869039 | 0.1930628 | 2.956   | 0.197  | 2.735   | 3.114   | 2.305   | 0.658  | 1.586   | 2.877   |
| 1918 | ENSG00000262001 | DLGAP1-AS2 | 1.6  | 1.12E-12  | 1.213E-10 | 38.132  | 1.163  | 37.063  | 39.369  | 24.134  | 2.577  | 21.899  | 26.952  |
| 1919 | ENSG00000116544 | DLGAP3     | -1.2 | 0.0219594 | 0.0678231 | 4.718   | 0.261  | 4.566   | 5.020   | 5.775   | 0.471  | 5.371   | 6.292   |
| 1920 | ENSG00000232907 | DLGAP4-AS1 | -2   | 0.0001997 | 0.0015955 | 1.013   | 0.214  | 0.788   | 1.212   | 2.047   | 0.229  | 1.912   | 2.310   |
| 1921 | ENSG00000126787 | DLGAP5     | -1.2 | 6.855E-07 | 1.4E-05   | 269.700 | 14.645 | 260.064 | 286.552 | 333.771 | 23.382 | 313.140 | 359.169 |
| 1922 | ENSG00000198719 | DLL1       | -1.6 | 1.941E-06 | 3.305E-05 | 4.394   | 0.719  | 3.616   | 5.034   | 7.325   | 0.556  | 6.981   | 7.967   |
| 1923 | ENSG00000090932 | DLL3       | -1.8 | 1.616E-05 | 0.0001981 | 3.906   | 0.561  | 3.553   | 4.553   | 7.011   | 1.713  | 5.161   | 8.543   |
| 1924 | ENSG00000198947 | DMD        | -1.2 | 0.0012473 | 0.0070138 | 1.950   | 0.160  | 1.765   | 2.046   | 2.460   | 0.197  | 2.308   | 2.683   |

|      | A               | B          | C    | D         | E         | F       | G      | H       | I       | J       | K      | L       | M       |
|------|-----------------|------------|------|-----------|-----------|---------|--------|---------|---------|---------|--------|---------|---------|
| 1925 | ENSG00000172869 | DMXL1      | 1.1  | 0.0936943 | 0.2038138 | 25.053  | 0.726  | 24.221  | 25.563  | 24.358  | 1.175  | 23.431  | 25.680  |
| 1927 | ENSG00000104093 | DMXL2      | 1.1  | 0.0004609 | 0.0031319 | 14.389  | 0.208  | 14.244  | 14.627  | 12.805  | 0.842  | 12.086  | 13.731  |
| 1928 | ENSG00000138346 | DNA2       | -1.1 | 0.0079945 | 0.0305816 | 35.819  | 2.349  | 33.755  | 38.375  | 40.256  | 0.440  | 39.750  | 40.556  |
| 1929 | ENSG00000165506 | DNAAF2     | -1.1 | 0.0104506 | 0.0378079 | 29.319  | 3.047  | 26.649  | 32.638  | 33.847  | 1.013  | 32.726  | 34.695  |
| 1931 | ENSG00000105877 | DNAH11     | -1.9 | 1.621E-05 | 0.0001984 | 0.333   | 0.080  | 0.277   | 0.425   | 0.643   | 0.092  | 0.547   | 0.730   |
| 1932 | ENSG00000185842 | DNAH14     | 1.3  | 1.097E-05 | 0.0001445 | 4.639   | 0.105  | 4.566   | 4.759   | 3.711   | 0.243  | 3.431   | 3.864   |
| 1933 | ENSG00000039139 | DNAH5      | 1.3  | 0.0497524 | 0.1264786 | 0.399   | 0.079  | 0.341   | 0.488   | 0.307   | 0.047  | 0.255   | 0.344   |
| 1934 | ENSG00000086061 | DNAJA1     | 1.1  | 0.0001722 | 0.0014135 | 204.465 | 0.839  | 203.940 | 205.432 | 185.828 | 7.980  | 177.768 | 193.726 |
| 1936 | ENSG00000069345 | DNAJA2     | -1.1 | 0.0003322 | 0.0023941 | 49.805  | 2.100  | 47.416  | 51.362  | 57.163  | 0.901  | 56.202  | 57.990  |
| 1937 | ENSG00000103423 | DNAJA3     | -1.1 | 0.0844257 | 0.1890246 | 22.057  | 0.286  | 21.849  | 22.384  | 23.986  | 1.487  | 22.270  | 24.883  |
| 1938 | ENSG00000140403 | DNAJA4     | 1.3  | 0.0009146 | 0.0054246 | 6.203   | 0.320  | 5.847   | 6.465   | 4.963   | 0.864  | 4.229   | 5.914   |
| 1939 | ENSG00000132002 | DNAJB1     | 1.1  | 0.0049066 | 0.02084   | 47.244  | 1.788  | 45.315  | 48.844  | 43.182  | 1.680  | 41.267  | 44.408  |
| 1940 | ENSG00000090520 | DNAJB11    | 1.1  | 0.0027267 | 0.0130718 | 21.020  | 0.421  | 20.641  | 21.474  | 18.831  | 1.821  | 17.193  | 20.792  |
| 1941 | ENSG00000148719 | DNAJB12    | 1.1  | 0.0786503 | 0.179129  | 9.048   | 0.677  | 8.520   | 9.811   | 8.394   | 0.504  | 7.829   | 8.797   |
| 1942 | ENSG00000162616 | DNAJB4     | -1.3 | 0.000287  | 0.0021354 | 12.412  | 0.509  | 11.950  | 12.957  | 15.960  | 1.925  | 14.697  | 18.175  |
| 1943 | ENSG00000137094 | DNAJB5     | 1.4  | 1.79E-12  | 1.876E-10 | 46.534  | 0.560  | 45.890  | 46.913  | 32.859  | 1.478  | 31.646  | 34.505  |
| 1944 | ENSG00000105993 | DNAJB6     | 1.1  | 0.0006552 | 0.0041629 | 46.574  | 1.473  | 45.030  | 47.965  | 43.303  | 0.782  | 42.753  | 44.199  |
| 1945 | ENSG00000077232 | DNAJC10    | 1.2  | 7.545E-06 | 0.0001048 | 26.407  | 1.258  | 25.191  | 27.703  | 23.351  | 0.422  | 23.094  | 23.839  |
| 1946 | ENSG00000007923 | DNAJC11    | -1.1 | 0.0061206 | 0.0247511 | 47.574  | 1.413  | 46.516  | 49.179  | 53.158  | 1.328  | 51.784  | 54.436  |
| 1947 | ENSG00000138246 | DNAJC13    | 1.2  | 3.682E-07 | 8.337E-06 | 28.938  | 1.013  | 27.781  | 29.665  | 24.522  | 0.089  | 24.420  | 24.574  |
| 1948 | ENSG00000120675 | DNAJC15    | 1.1  | 0.0538942 | 0.1345604 | 6.035   | 0.318  | 5.691   | 6.320   | 5.531   | 0.226  | 5.270   | 5.665   |
| 1949 | ENSG00000205981 | DNAJC19    | 1.1  | 0.0039524 | 0.0176192 | 24.663  | 1.517  | 23.702  | 26.412  | 22.049  | 0.272  | 21.870  | 22.362  |
| 1950 | ENSG00000168724 | DNAJC21    | 1.1  | 0.0005445 | 0.0035852 | 26.637  | 1.030  | 25.681  | 27.729  | 23.963  | 0.639  | 23.371  | 24.639  |
| 1951 | ENSG00000059769 | DNAJC25    | 1.3  | 0.0003054 | 0.002242  | 17.336  | 0.272  | 17.025  | 17.528  | 14.079  | 1.100  | 13.152  | 15.295  |
| 1952 | ENSG00000247400 | DNAJC3-AS1 | 1.3  | 0.0130765 | 0.0452461 | 7.908   | 0.580  | 7.461   | 8.563   | 6.456   | 0.815  | 5.560   | 7.152   |
| 1953 | ENSG00000101152 | DNAJC5     | 1.2  | 1.709E-07 | 4.366E-06 | 30.615  | 1.158  | 29.378  | 31.674  | 25.113  | 0.256  | 24.842  | 25.352  |
| 1954 | ENSG00000168259 | DNAJC7     | 1.2  | 6.02E-05  | 0.0005975 | 27.697  | 1.131  | 26.621  | 28.876  | 24.512  | 1.291  | 23.040  | 25.450  |
| 1955 | ENSG00000163879 | DNALI1     | 1.1  | 0.019958  | 0.0629171 | 13.641  | 0.536  | 13.022  | 13.958  | 12.242  | 0.745  | 11.477  | 12.965  |
| 1956 | ENSG00000213918 | DNASE1     | -1.2 | 0.0025288 | 0.0122851 | 4.231   | 0.271  | 3.919   | 4.400   | 5.085   | 0.357  | 4.737   | 5.451   |
| 1957 | ENSG00000013563 | DNASE1L1   | 1.2  | 0.0017318 | 0.0091019 | 10.723  | 0.343  | 10.497  | 11.118  | 8.902   | 1.041  | 8.047   | 10.062  |
| 1958 | ENSG00000105612 | DNASE2     | 1.4  | 4.395E-08 | 1.342E-06 | 45.528  | 1.010  | 44.868  | 46.690  | 33.653  | 2.355  | 31.268  | 35.976  |
| 1959 | ENSG00000187957 | DNER       | 1.3  | 0.008234  | 0.0312808 | 5.470   | 0.715  | 4.881   | 6.266   | 4.447   | 0.544  | 3.828   | 4.849   |
| 1960 | ENSG00000179532 | DNHD1      | -1.9 | 1.18E-13  | 1.59E-11  | 2.573   | 0.126  | 2.436   | 2.685   | 4.922   | 0.627  | 4.225   | 5.441   |
| 1961 | ENSG00000106976 | DNM1       | -1.1 | 0.0215911 | 0.0669668 | 15.436  | 0.845  | 14.947  | 16.412  | 17.192  | 0.473  | 16.719  | 17.665  |
| 1962 | ENSG00000079805 | DNM2       | -1.1 | 0.0015387 | 0.008275  | 23.985  | 0.531  | 23.373  | 24.332  | 27.233  | 0.988  | 26.444  | 28.341  |
| 1963 | ENSG00000197959 | DNM3       | 2    | 9.841E-06 | 0.0001319 | 0.889   | 0.098  | 0.776   | 0.951   | 0.457   | 0.093  | 0.359   | 0.545   |
| 1965 | ENSG00000107554 | DNMBP      | -1.1 | 0.0073461 | 0.0285552 | 24.687  | 1.735  | 22.685  | 25.744  | 27.761  | 0.561  | 27.121  | 28.171  |
| 1966 | ENSG00000130816 | DNMT1      | -1.1 | 0.0045514 | 0.0196673 | 50.796  | 0.580  | 50.131  | 51.199  | 56.125  | 1.866  | 54.662  | 58.227  |
| 1967 | ENSG00000119772 | DNMT3A     | 1.2  | 3.96E-06  | 6.061E-05 | 29.070  | 1.732  | 27.109  | 30.392  | 24.889  | 0.838  | 24.339  | 25.853  |
| 1968 | ENSG00000088305 | DNMT3B     | -1.1 | 0.024889  | 0.0747333 | 505.597 | 21.031 | 482.524 | 523.694 | 577.086 | 62.967 | 509.672 | 634.380 |
| 1969 | ENSG00000067334 | DNTTIP2    | -1.1 | 0.0008602 | 0.0051759 | 28.397  | 1.026  | 27.344  | 29.395  | 33.298  | 1.471  | 31.952  | 34.869  |

|      | A               | B       | C    | D         | E         | F       | G      | H       | I       | J       | K      | L       | M       |
|------|-----------------|---------|------|-----------|-----------|---------|--------|---------|---------|---------|--------|---------|---------|
| 1970 | ENSG00000149927 | DOC2A   | -1.2 | 0.0307043 | 0.0878386 | 3.488   | 0.216  | 3.269   | 3.702   | 4.259   | 0.696  | 3.456   | 4.673   |
| 1971 | ENSG00000147251 | DOCK11  | 1.3  | 2.683E-07 | 6.381E-06 | 15.435  | 0.413  | 14.959  | 15.685  | 11.752  | 0.815  | 11.062  | 12.651  |
| 1972 | ENSG00000134516 | DOCK2   | 1.2  | 0.0006637 | 0.0041993 | 3.592   | 0.164  | 3.444   | 3.768   | 2.997   | 0.050  | 2.940   | 3.030   |
| 1973 | ENSG00000088538 | DOCK3   | 1.1  | 0.019096  | 0.0608001 | 10.763  | 0.793  | 9.853   | 11.306  | 9.808   | 0.880  | 8.798   | 10.408  |
| 1974 | ENSG00000128512 | DOCK4   | -1.1 | 0.0997311 | 0.2128663 | 4.942   | 0.361  | 4.638   | 5.341   | 5.540   | 0.698  | 4.781   | 6.154   |
| 1975 | ENSG00000147459 | DOCK5   | 1.2  | 0.0002229 | 0.0017411 | 4.179   | 0.350  | 3.950   | 4.582   | 3.440   | 0.224  | 3.269   | 3.694   |
| 1976 | ENSG00000130158 | DOCK6   | -1.2 | 7.302E-05 | 0.0006997 | 6.417   | 0.270  | 6.178   | 6.709   | 7.961   | 0.457  | 7.489   | 8.402   |
| 1977 | ENSG00000116641 | DOCK7   | 1.1  | 0.0001518 | 0.0012699 | 8.242   | 0.211  | 8.069   | 8.477   | 7.350   | 0.192  | 7.175   | 7.555   |
| 1978 | ENSG00000107099 | DOCK8   | 2.5  | 5.952E-07 | 1.247E-05 | 0.552   | 0.046  | 0.525   | 0.605   | 0.224   | 0.080  | 0.136   | 0.293   |
| 1979 | ENSG00000125170 | DOK4    | -1.2 | 0.0001315 | 0.0011304 | 11.569  | 0.215  | 11.357  | 11.787  | 14.503  | 0.930  | 13.558  | 15.418  |
| 1980 | ENSG00000175283 | DOLK    | 1.3  | 0.0014051 | 0.0076833 | 17.110  | 2.080  | 15.188  | 19.318  | 13.370  | 1.017  | 12.647  | 14.533  |
| 1981 | ENSG00000167130 | DOLPP1  | -1.1 | 0.0407408 | 0.1085287 | 32.991  | 1.749  | 31.069  | 34.488  | 37.182  | 2.119  | 35.466  | 39.551  |
| 1982 | ENSG00000083097 | DOPEY1  | -1.1 | 0.0563962 | 0.1391234 | 8.627   | 0.522  | 8.025   | 8.957   | 9.593   | 0.075  | 9.513   | 9.663   |
| 1983 | ENSG00000104885 | DOT1L   | -1.2 | 1.613E-05 | 0.000198  | 16.814  | 0.649  | 16.231  | 17.513  | 20.981  | 1.623  | 19.330  | 22.575  |
| 1984 | ENSG00000172269 | DPAGT1  | -1.2 | 6.962E-05 | 0.0006728 | 19.646  | 0.770  | 18.999  | 20.497  | 24.239  | 1.266  | 22.795  | 25.159  |
| 1985 | ENSG0000015413  | DPEP1   | -2.2 | 2.97E-11  | 2.215E-09 | 3.681   | 0.306  | 3.452   | 4.028   | 8.422   | 0.081  | 8.353   | 8.511   |
| 1987 | ENSG00000141096 | DPEP3   | 1.2  | 0.0528165 | 0.1324956 | 7.392   | 0.968  | 6.662   | 8.490   | 6.176   | 0.577  | 5.706   | 6.820   |
| 1989 | ENSG00000108963 | DPH1    | -1.2 | 0.0034291 | 0.0156875 | 5.540   | 0.389  | 5.181   | 5.954   | 6.868   | 0.250  | 6.580   | 7.036   |
| 1990 | ENSG00000132768 | DPH2    | -1.2 | 0.0001055 | 0.0009435 | 32.078  | 1.802  | 30.000  | 33.207  | 39.149  | 2.988  | 37.314  | 42.596  |
| 1991 | ENSG00000117543 | DPH5    | -1.1 | 0.0356508 | 0.0981544 | 45.601  | 0.851  | 44.641  | 46.262  | 50.263  | 1.552  | 48.472  | 51.238  |
| 1992 | ENSG00000134146 | DPH6    | 1.1  | 0.0128748 | 0.0446393 | 9.430   | 0.268  | 9.151   | 9.685   | 8.452   | 0.478  | 7.944   | 8.893   |
| 1993 | ENSG00000148399 | DPH7    | -1.1 | 0.0115894 | 0.0410754 | 15.303  | 0.174  | 15.111  | 15.451  | 17.720  | 0.227  | 17.545  | 17.977  |
| 1994 | ENSG00000175497 | DPP10   | -1.2 | 0.0125455 | 0.0437038 | 3.079   | 0.200  | 2.937   | 3.308   | 3.726   | 0.171  | 3.595   | 3.920   |
| 1995 | ENSG00000254986 | DPP3    | 1.1  | 0.0021756 | 0.0108191 | 41.777  | 1.270  | 40.354  | 42.795  | 37.894  | 1.536  | 36.130  | 38.933  |
| 1996 | ENSG00000197635 | DPP4    | -1.4 | 0.0124228 | 0.0433569 | 2.140   | 0.553  | 1.503   | 2.498   | 2.985   | 0.484  | 2.623   | 3.534   |
| 1997 | ENSG00000130226 | DPP6    | -1.2 | 0.0048531 | 0.0206891 | 1.632   | 0.056  | 1.578   | 1.690   | 2.068   | 0.140  | 1.934   | 2.212   |
| 1998 | ENSG00000176978 | DPP7    | 1.2  | 0.0113165 | 0.0402432 | 11.119  | 1.378  | 9.535   | 12.042  | 9.260   | 1.413  | 7.710   | 10.475  |
| 1999 | ENSG00000074603 | DPP8    | -1.1 | 0.0635435 | 0.1522189 | 13.166  | 0.389  | 12.941  | 13.615  | 14.432  | 0.336  | 14.053  | 14.693  |
| 2000 | ENSG00000163530 | DPPA2   | -1.6 | 5.023E-07 | 1.088E-05 | 10.853  | 0.478  | 10.362  | 11.316  | 18.211  | 1.818  | 16.395  | 20.031  |
| 2001 | ENSG00000121570 | DPPA4   | 1.1  | 0.0002984 | 0.0022021 | 497.198 | 13.683 | 481.418 | 505.767 | 462.156 | 10.375 | 454.922 | 474.043 |
| 2002 | ENSG00000178904 | DPY19L3 | 1.2  | 1.142E-05 | 0.000149  | 29.116  | 1.239  | 27.691  | 29.946  | 25.331  | 0.865  | 24.503  | 26.228  |
| 2003 | ENSG00000092964 | DPYSL2  | -1.1 | 0.0616516 | 0.1485771 | 44.109  | 0.392  | 43.665  | 44.405  | 47.731  | 1.350  | 46.473  | 49.157  |
| 2004 | ENSG00000113657 | DPYSL3  | -1.4 | 1.20E-15  | 2.59E-13  | 203.733 | 6.663  | 197.066 | 210.391 | 288.223 | 7.581  | 280.265 | 295.359 |
| 2005 | ENSG00000151640 | DPYSL4  | 1.4  | 1.776E-06 | 3.061E-05 | 19.482  | 1.655  | 17.572  | 20.500  | 14.721  | 1.205  | 13.347  | 15.598  |
| 2007 | ENSG00000157851 | DPYSL5  | -1.1 | 0.0944867 | 0.2052556 | 3.238   | 0.554  | 2.732   | 3.830   | 3.763   | 0.186  | 3.583   | 3.955   |
| 2008 | ENSG00000117505 | DR1     | -1.1 | 0.0354296 | 0.097784  | 24.747  | 1.463  | 23.153  | 26.031  | 27.207  | 0.043  | 27.162  | 27.247  |
| 2009 | ENSG00000162490 | DRAXIN  | 1.3  | 5.024E-05 | 0.000515  | 11.054  | 0.764  | 10.384  | 11.886  | 8.693   | 0.586  | 8.133   | 9.302   |
| 2010 | ENSG00000069696 | DRD4    | -1.4 | 0.0543334 | 0.1353773 | 2.072   | 0.222  | 1.816   | 2.201   | 3.052   | 0.297  | 2.825   | 3.388   |
| 2011 | ENSG00000185721 | DRG1    | -1.1 | 0.0079466 | 0.0304571 | 61.309  | 1.554  | 59.570  | 62.562  | 68.898  | 0.900  | 68.077  | 69.860  |
| 2012 | ENSG00000113360 | DROSHA  | -1.1 | 0.0022803 | 0.0112605 | 36.421  | 0.722  | 35.739  | 37.177  | 40.771  | 0.481  | 40.263  | 41.220  |
| 2013 | ENSG00000134755 | DSC2    | 1.2  | 0.000163  | 0.0013537 | 13.547  | 0.760  | 12.802  | 14.322  | 11.628  | 0.419  | 11.271  | 12.089  |
| 2014 | ENSG00000134762 | DSC3    | -1.2 | 0.0139682 | 0.0476875 | 3.184   | 0.408  | 2.764   | 3.578   | 3.958   | 0.483  | 3.467   | 4.433   |
| 2016 | ENSG00000136982 | DSCC1   | 1.1  | 0.0678935 | 0.1600994 | 77.650  | 2.510  | 76.067  | 80.544  | 74.372  | 3.797  | 70.238  | 77.705  |

|      | A               | B        | C    | D         | E         | F       | G     | H       | I       | J       | K      | L       | M       |
|------|-----------------|----------|------|-----------|-----------|---------|-------|---------|---------|---------|--------|---------|---------|
| 2017 | ENSG00000171451 | DSEL     | 1.2  | 0.0087986 | 0.0328645 | 3.785   | 0.894 | 3.126   | 4.802   | 3.103   | 0.179  | 2.917   | 3.274   |
| 2018 | ENSG00000046604 | DSG2     | 1.1  | 0.0075688 | 0.0292945 | 165.225 | 6.708 | 158.685 | 172.089 | 157.533 | 2.519  | 155.477 | 160.342 |
| 2019 | ENSG00000149636 | DSN1     | -1.1 | 0.0084694 | 0.0319156 | 33.587  | 1.387 | 32.202  | 34.975  | 38.652  | 1.776  | 36.602  | 39.690  |
| 2020 | ENSG00000125868 | DSTN     | 1.1  | 0.0079366 | 0.0304313 | 176.462 | 1.569 | 175.362 | 178.259 | 167.746 | 3.840  | 163.405 | 170.700 |
| 2021 | ENSG00000248593 | DSTNP2   | 1.3  | 0.0102234 | 0.0371208 | 15.551  | 0.637 | 14.831  | 16.045  | 12.080  | 1.647  | 10.191  | 13.211  |
| 2023 | ENSG00000125821 | DTD1     | 1.1  | 0.022041  | 0.0679757 | 43.151  | 1.931 | 41.983  | 45.380  | 40.568  | 0.416  | 40.105  | 40.912  |
| 2024 | ENSG00000129480 | DTD2     | 1.1  | 0.0152072 | 0.0509911 | 16.347  | 1.013 | 15.381  | 17.401  | 14.584  | 0.469  | 14.213  | 15.110  |
| 2025 | ENSG00000143476 | DTL      | 1.1  | 0.0025292 | 0.0122851 | 44.958  | 2.316 | 42.287  | 46.402  | 41.163  | 1.427  | 39.962  | 42.740  |
| 2026 | ENSG00000134769 | DTNA     | 1.6  | 2.15E-13  | 2.72E-11  | 9.703   | 0.641 | 9.210   | 10.428  | 6.250   | 0.133  | 6.097   | 6.338   |
| 2027 | ENSG00000104047 | DTWD1    | -1.1 | 0.016533  | 0.0544754 | 5.748   | 0.225 | 5.513   | 5.962   | 6.537   | 0.064  | 6.469   | 6.597   |
| 2028 | ENSG00000169570 | DTWD2    | 1.5  | 4.13E-06  | 6.288E-05 | 8.305   | 1.483 | 6.938   | 9.881   | 5.678   | 0.526  | 5.079   | 6.064   |
| 2029 | ENSG00000163840 | DTX3L    | 1.1  | 0.0931941 | 0.2029915 | 8.682   | 0.334 | 8.302   | 8.932   | 8.014   | 0.926  | 7.143   | 8.987   |
| 2030 | ENSG00000110042 | DTX4     | 1.2  | 3.78E-05  | 0.0004052 | 16.378  | 0.533 | 15.866  | 16.930  | 13.777  | 0.678  | 13.083  | 14.437  |
| 2031 | ENSG00000141994 | DUS3L    | 1.2  | 0.0040402 | 0.017907  | 15.834  | 0.533 | 15.374  | 16.418  | 13.812  | 0.771  | 12.969  | 14.480  |
| 2032 | ENSG00000120129 | DUSP1    | -1.2 | 0.0268628 | 0.079138  | 6.386   | 1.107 | 5.192   | 7.379   | 8.142   | 0.542  | 7.522   | 8.521   |
| 2033 | ENSG00000081721 | DUSP12   | 1.3  | 2.136E-05 | 0.0002514 | 38.636  | 2.975 | 36.725  | 42.065  | 31.171  | 1.523  | 29.438  | 32.298  |
| 2034 | ENSG00000276023 | DUSP14   | 1.2  | 0.0016213 | 0.0086285 | 29.316  | 1.116 | 28.080  | 30.250  | 25.338  | 1.783  | 23.281  | 26.445  |
| 2035 | ENSG00000111266 | DUSP16   | -1.2 | 3.602E-06 | 5.605E-05 | 42.660  | 2.640 | 39.620  | 44.378  | 51.827  | 1.331  | 50.437  | 53.089  |
| 2036 | ENSG00000167065 | DUSP18   | -1.3 | 0.0917642 | 0.2010639 | 1.098   | 0.195 | 0.904   | 1.295   | 1.468   | 0.410  | 1.082   | 1.898   |
| 2037 | ENSG00000158050 | DUSP2    | 1.6  | 1.006E-06 | 1.911E-05 | 15.537  | 2.452 | 13.374  | 18.200  | 9.706   | 1.143  | 8.601   | 10.884  |
| 2038 | ENSG00000133878 | DUSP26   | -1.9 | 0.0008862 | 0.0052942 | 1.252   | 0.363 | 1.007   | 1.670   | 2.404   | 0.351  | 2.134   | 2.800   |
| 2040 | ENSG00000108861 | DUSP3    | 1.2  | 6.08E-05  | 0.0006024 | 33.399  | 1.333 | 32.160  | 34.809  | 29.146  | 1.405  | 27.670  | 30.467  |
| 2041 | ENSG00000120875 | DUSP4    | 1.7  | 5.79E-10  | 3.004E-08 | 7.765   | 0.752 | 7.146   | 8.602   | 4.667   | 0.503  | 4.109   | 5.086   |
| 2042 | ENSG00000138166 | DUSP5    | 1.5  | 3.873E-09 | 1.64E-07  | 25.166  | 1.283 | 24.157  | 26.610  | 17.294  | 1.733  | 15.699  | 19.139  |
| 2043 | ENSG00000139318 | DUSP6    | 1.3  | 3.325E-08 | 1.043E-06 | 73.016  | 3.555 | 69.341  | 76.436  | 55.793  | 6.918  | 49.756  | 63.343  |
| 2044 | ENSG00000164086 | DUSP7    | -1.2 | 0.0067398 | 0.026683  | 7.396   | 0.383 | 7.032   | 7.795   | 8.903   | 0.172  | 8.717   | 9.055   |
| 2045 | ENSG00000130829 | DUSP9    | -1.4 | 0.0653783 | 0.1554319 | 1.122   | 0.340 | 0.851   | 1.503   | 1.655   | 0.660  | 0.895   | 2.085   |
| 2046 | ENSG00000128951 | DUT      | -1.1 | 0.0031685 | 0.0147342 | 51.737  | 1.397 | 50.695  | 53.325  | 58.579  | 1.394  | 57.698  | 60.186  |
| 2048 | ENSG00000107404 | DVL1     | -1.2 | 2.628E-05 | 0.0002987 | 29.669  | 0.798 | 29.102  | 30.582  | 37.190  | 4.247  | 33.104  | 41.581  |
| 2049 | ENSG00000161202 | DVL3     | -1.1 | 0.0061685 | 0.024911  | 27.442  | 0.373 | 27.130  | 27.856  | 30.895  | 1.099  | 29.861  | 32.050  |
| 2050 | ENSG00000197102 | DYNC1H1  | -1.1 | 0.0040868 | 0.0180609 | 104.523 | 1.428 | 102.913 | 105.638 | 114.987 | 6.406  | 108.889 | 121.662 |
| 2051 | ENSG00000158560 | DYNC1I1  | 1.3  | 0.0302985 | 0.0869424 | 2.217   | 0.312 | 2.036   | 2.577   | 1.740   | 0.233  | 1.571   | 2.006   |
| 2052 | ENSG00000135720 | DYNC1LI2 | -1.1 | 0.0001455 | 0.001227  | 48.367  | 1.772 | 46.938  | 50.350  | 55.916  | 0.664  | 55.419  | 56.671  |
| 2054 | ENSG00000138036 | DYNC2LI1 | 1.2  | 0.0084069 | 0.031738  | 8.466   | 0.604 | 7.775   | 8.894   | 7.356   | 0.207  | 7.119   | 7.499   |
| 2056 | ENSG00000088986 | DYNLL1   | 1.2  | 7.235E-05 | 0.000694  | 167.885 | 3.371 | 164.008 | 170.123 | 148.612 | 12.680 | 140.276 | 163.204 |
| 2057 | ENSG00000264364 | DYNLL2   | 1.1  | 0.0002325 | 0.0018038 | 79.502  | 4.916 | 73.898  | 83.086  | 72.077  | 2.293  | 69.501  | 73.896  |
| 2058 | ENSG00000125971 | DYNLRB1  | 1.2  | 0.0002011 | 0.0016039 | 59.287  | 0.537 | 58.686  | 59.718  | 51.705  | 3.717  | 49.526  | 55.996  |
| 2059 | ENSG00000146425 | DYNLT1   | 1.1  | 0.0005822 | 0.0037917 | 57.789  | 0.631 | 57.237  | 58.478  | 51.762  | 2.323  | 49.084  | 53.224  |
| 2060 | ENSG00000157540 | DYRK1A   | -1.1 | 0.0951586 | 0.2060978 | 20.381  | 0.440 | 20.124  | 20.889  | 21.978  | 0.525  | 21.517  | 22.550  |
| 2061 | ENSG00000105204 | DYRK1B   | -1.2 | 0.0491463 | 0.1254996 | 4.192   | 0.205 | 3.978   | 4.387   | 5.151   | 0.503  | 4.573   | 5.490   |
| 2062 | ENSG00000127334 | DYRK2    | -1.2 | 5.742E-06 | 8.379E-05 | 19.287  | 1.046 | 18.658  | 20.494  | 23.907  | 0.825  | 23.359  | 24.855  |
| 2063 | ENSG00000135636 | DYSF     | -1.2 | 0.0019976 | 0.0101703 | 3.710   | 0.241 | 3.433   | 3.876   | 4.727   | 0.296  | 4.478   | 5.054   |
| 2064 | ENSG00000134874 | DZIP1    | 1.2  | 1.424E-05 | 0.0001795 | 14.970  | 0.344 | 14.590  | 15.262  | 12.336  | 1.191  | 11.310  | 13.641  |

|      | A               | B         | C    | D         | E         | F        | G      | H        | I        | J        | K      | L        | M        |
|------|-----------------|-----------|------|-----------|-----------|----------|--------|----------|----------|----------|--------|----------|----------|
| 2065 | ENSG00000101412 | E2F1      | 1.1  | 0.0808096 | 0.1826938 | 24.186   | 0.671  | 23.654   | 24.940   | 22.605   | 0.989  | 21.736   | 23.682   |
| 2066 | ENSG00000007968 | E2F2      | 1.2  | 0.0601387 | 0.1458874 | 3.123    | 0.520  | 2.570    | 3.604    | 2.672    | 0.185  | 2.477    | 2.846    |
| 2068 | ENSG00000133740 | E2F5      | 1.1  | 0.0345645 | 0.0960233 | 22.787   | 0.218  | 22.544   | 22.964   | 21.606   | 0.348  | 21.255   | 21.951   |
| 2069 | ENSG00000169016 | E2F6      | 1.2  | 0.0013836 | 0.0075841 | 12.677   | 0.666  | 11.921   | 13.178   | 10.693   | 0.171  | 10.504   | 10.837   |
| 2071 | ENSG00000234764 | E2F6P1    | 1.3  | 0.076866  | 0.1757981 | 8.644    | 0.414  | 8.365    | 9.119    | 6.987    | 0.429  | 6.504    | 7.325    |
| 2072 | ENSG00000224688 | E2F6P2    | 1.4  | 0.1035337 | 0.2186919 | 4.395    | 0.184  | 4.237    | 4.596    | 3.300    | 0.176  | 3.104    | 3.444    |
| 2073 | ENSG00000167967 | E4F1      | -1.4 | 4.811E-06 | 7.194E-05 | 5.791    | 0.401  | 5.446    | 6.231    | 8.133    | 0.746  | 7.277    | 8.648    |
| 2074 | ENSG00000129518 | EAPP      | -1.1 | 0.1195853 | 0.242221  | 41.012   | 1.685  | 39.275   | 42.641   | 44.982   | 2.454  | 42.528   | 47.435   |
| 2076 | ENSG00000088881 | EBF4      | -1.5 | 0.0254772 | 0.0760641 | 0.797    | 0.103  | 0.721    | 0.914    | 1.253    | 0.364  | 1.010    | 1.671    |
| 2077 | ENSG00000105246 | EBI3      | 1.3  | 0.079108  | 0.1799684 | 4.230    | 0.461  | 3.797    | 4.715    | 3.311    | 0.060  | 3.266    | 3.379    |
| 2078 | ENSG00000281649 | EBLN3P    | -1.1 | 0.008306  | 0.0314624 | 33.088   | 0.932  | 32.055   | 33.864   | 37.213   | 2.385  | 35.740   | 39.965   |
| 2080 | ENSG00000117395 | EBNA1BP2  | 1.1  | 0.0018902 | 0.0097376 | 48.500   | 3.387  | 45.056   | 51.827   | 44.052   | 0.774  | 43.217   | 44.745   |
| 2081 | ENSG00000147155 | EBP       | 1.3  | 7.14E-08  | 2.019E-06 | 67.595   | 2.260  | 65.334   | 69.853   | 54.326   | 1.854  | 52.282   | 55.899   |
| 2082 | ENSG00000123179 | EBPL      | -1.2 | 1.429E-06 | 2.557E-05 | 89.904   | 2.422  | 87.396   | 92.229   | 113.720  | 8.889  | 103.551  | 120.010  |
| 2083 | ENSG00000122882 | ECD       | -1.1 | 0.0013363 | 0.0073859 | 43.078   | 2.486  | 40.872   | 45.771   | 49.936   | 3.096  | 47.085   | 53.230   |
| 2084 | ENSG00000145194 | ECE2      | -1.3 | 0.000705  | 0.0043993 | 3.075    | 0.217  | 2.907    | 3.320    | 4.170    | 0.531  | 3.603    | 4.655    |
| 2085 | ENSG00000171551 | ECEL1     | 1.1  | 0.0886933 | 0.195985  | 15.071   | 1.232  | 13.662   | 15.941   | 13.792   | 1.788  | 11.848   | 15.366   |
| 2086 | ENSG00000244280 | ECEL1P2   | 1.2  | 0.0452894 | 0.1177707 | 14.570   | 2.387  | 12.102   | 16.867   | 12.361   | 0.877  | 11.530   | 13.277   |
| 2087 | ENSG00000093144 | ECHDC1    | 1.3  | 1.944E-08 | 6.589E-07 | 34.077   | 0.268  | 33.848   | 34.372   | 27.310   | 0.490  | 26.773   | 27.734   |
| 2088 | ENSG00000127884 | ECHS1     | -1.1 | 0.1089749 | 0.2269539 | 104.447  | 6.368  | 98.886   | 111.393  | 112.927  | 1.984  | 110.742  | 114.615  |
| 2089 | ENSG00000167969 | ECI1      | -1.1 | 0.1198789 | 0.2426706 | 23.513   | 0.877  | 22.507   | 24.121   | 25.864   | 2.018  | 24.667   | 28.194   |
| 2090 | ENSG00000130159 | ECSIT     | -1.1 | 0.0143552 | 0.0487724 | 28.580   | 1.934  | 27.224   | 30.795   | 33.173   | 1.414  | 32.110   | 34.777   |
| 2091 | ENSG00000114346 | ECT2      | -1.2 | 0.0002365 | 0.0018286 | 99.980   | 9.112  | 94.221   | 110.485  | 117.921  | 3.385  | 114.895  | 121.576  |
| 2092 | ENSG00000158813 | EDA       | -1.1 | 0.0207826 | 0.0650317 | 7.577    | 0.341  | 7.236    | 7.919    | 8.818    | 0.817  | 7.921    | 9.519    |
| 2093 | ENSG00000186197 | EDARADD   | 1.4  | 0.0030029 | 0.0141076 | 2.825    | 0.203  | 2.651    | 3.049    | 2.024    | 0.287  | 1.698    | 2.236    |
| 2094 | ENSG00000179151 | EDC3      | -1.1 | 0.0134238 | 0.0462113 | 24.917   | 1.484  | 23.204   | 25.825   | 28.080   | 0.959  | 27.471   | 29.185   |
| 2095 | ENSG00000038358 | EDC4      | -1.2 | 0.0002441 | 0.0018739 | 15.644   | 0.400  | 15.302   | 16.083   | 18.624   | 0.613  | 18.239   | 19.331   |
| 2096 | ENSG00000134109 | EDEM1     | 1.3  | 2.601E-06 | 4.275E-05 | 14.981   | 1.337  | 13.757   | 16.407   | 11.984   | 0.514  | 11.536   | 12.545   |
| 2097 | ENSG00000088298 | EDEM2     | 1.3  | 1.122E-06 | 2.101E-05 | 48.479   | 3.138  | 44.855   | 50.309   | 37.718   | 2.184  | 36.013   | 40.180   |
| 2098 | ENSG00000116406 | EDEM3     | -1.2 | 0.0003603 | 0.0025601 | 9.889    | 0.205  | 9.668    | 10.071   | 11.947   | 0.523  | 11.343   | 12.265   |
| 2099 | ENSG00000164176 | EDIL3     | -1.1 | 0.0219971 | 0.0678777 | 34.903   | 2.972  | 32.871   | 38.314   | 39.295   | 2.699  | 37.350   | 42.376   |
| 2100 | ENSG00000151617 | EDNRA     | 1.4  | 0.0021579 | 0.0107564 | 3.763    | 0.528  | 3.275    | 4.323    | 2.754    | 0.365  | 2.382    | 3.111    |
| 2101 | ENSG00000136160 | EDNRB     | 1.3  | 0.0869142 | 0.1930628 | 21.246   | 7.612  | 16.795   | 30.035   | 16.214   | 1.033  | 15.022   | 16.813   |
| 2102 | ENSG00000107938 | EDRF1     | -1.1 | 0.0189586 | 0.0604537 | 13.190   | 0.522  | 12.703   | 13.741   | 14.778   | 0.410  | 14.337   | 15.147   |
| 2103 | ENSG00000102189 | EEA1      | 1.2  | 0.0028686 | 0.013572  | 13.908   | 0.662  | 13.144   | 14.314   | 12.127   | 0.484  | 11.644   | 12.611   |
| 2104 | ENSG00000156508 | EEF1A1    | 1.1  | 4.86E-05  | 0.0005009 | 3000.777 | 12.600 | 2987.475 | 3012.532 | 2768.113 | 74.830 | 2712.551 | 2853.202 |
| 2105 | ENSG00000228502 | EEF1A1P11 | 1.1  | 0.0103179 | 0.0374077 | 499.732  | 12.355 | 487.837  | 512.499  | 466.097  | 12.456 | 456.546  | 480.185  |
| 2106 | ENSG00000214199 | EEF1A1P12 | 1.1  | 0.0032675 | 0.015083  | 100.545  | 3.629  | 98.073   | 104.711  | 90.525   | 5.590  | 84.112   | 94.364   |

|      | A               | B             | C    | D         | E         | F         | G       | H         | I         | J         | K       | L         | M         |
|------|-----------------|---------------|------|-----------|-----------|-----------|---------|-----------|-----------|-----------|---------|-----------|-----------|
| 2107 | ENSG00000250182 | EEF1A1P13     | 1.1  | 0.0011281 | 0.0064745 | 570.674   | 7.249   | 562.618   | 576.669   | 528.220   | 14.291  | 511.729   | 536.988   |
| 2108 | ENSG00000249855 | EEF1A1P19     | 1.1  | 0.0910065 | 0.2000511 | 241.774   | 3.863   | 237.683   | 245.360   | 230.460   | 16.109  | 219.180   | 248.909   |
| 2109 | ENSG00000241429 | EEF1A1P25     | 1.2  | 0.030961  | 0.0884831 | 22.700    | 0.820   | 22.111    | 23.637    | 19.572    | 1.779   | 18.064    | 21.533    |
| 2110 | ENSG00000196205 | EEF1A1P5      | 1.1  | 1.55E-06  | 2.74E-05  | 18152.206 | 334.440 | 17766.626 | 18363.601 | 16467.706 | 116.633 | 16390.497 | 16601.874 |
| 2112 | ENSG00000233476 | EEF1A1P6      | 1.1  | 1.496E-05 | 0.0001859 | 8170.583  | 118.105 | 8034.477  | 8246.059  | 7492.305  | 174.164 | 7328.216  | 7675.043  |
| 2113 | ENSG00000249264 | EEF1A1P9      | 1.1  | 0.0292114 | 0.0845402 | 97.920    | 5.475   | 92.301    | 103.239   | 90.375    | 3.567   | 87.510    | 94.370    |
| 2115 | ENSG00000101210 | EEF1A2        | -1.2 | 0.0083876 | 0.0316933 | 24.616    | 0.873   | 24.068    | 25.623    | 29.089    | 2.434   | 27.121    | 31.810    |
| 2116 | ENSG00000123427 | EEF1AKMT<br>3 | -1.3 | 0.0032555 | 0.0150317 | 4.063     | 0.268   | 3.866     | 4.368     | 5.504     | 0.619   | 4.832     | 6.050     |
| 2117 | ENSG00000114942 | EEF1B2        | 1.1  | 0.0001452 | 0.0012256 | 214.842   | 1.315   | 213.603   | 216.222   | 196.309   | 5.678   | 189.835   | 200.443   |
| 2118 | ENSG00000232472 | EEF1B2P3      | 1.1  | 8.273E-05 | 0.0007735 | 687.254   | 15.999  | 669.699   | 701.014   | 620.296   | 34.240  | 586.731   | 655.174   |
| 2119 | ENSG00000213261 | EEF1B2P6      | 1.1  | 0.1204143 | 0.2435289 | 156.419   | 8.134   | 151.088   | 165.781   | 148.968   | 11.918  | 141.719   | 162.723   |
| 2120 | ENSG00000167658 | EEF2          | -1.1 | 0.0002664 | 0.0020135 | 1820.864  | 24.695  | 1792.525  | 1837.777  | 2052.319  | 71.197  | 1982.792  | 2125.077  |
| 2121 | ENSG00000118894 | EEF2KMT       | 1.1  | 0.0413127 | 0.1096035 | 17.781    | 1.068   | 17.144    | 19.014    | 16.323    | 0.956   | 15.410    | 17.316    |
| 2122 | ENSG00000132394 | EEFSEC        | 1.1  | 0.0886107 | 0.1958537 | 14.032    | 1.274   | 12.632    | 15.124    | 12.774    | 0.698   | 11.994    | 13.343    |
| 2125 | ENSG00000185055 | EFCAB10       | 1.2  | 0.1151194 | 0.235738  | 4.536     | 1.102   | 3.699     | 5.784     | 3.827     | 0.719   | 3.094     | 4.531     |
| 2126 | ENSG00000140025 | EFCAB11       | 1.2  | 0.0054947 | 0.0227274 | 4.341     | 0.449   | 4.055     | 4.858     | 3.647     | 0.302   | 3.317     | 3.910     |
| 2127 | ENSG00000178852 | EFCAB13       | 1.4  | 0.0086242 | 0.0323419 | 1.329     | 0.215   | 1.140     | 1.563     | 0.938     | 0.186   | 0.727     | 1.076     |
| 2128 | ENSG00000159658 | EFCAB14       | 1.1  | 0.0157652 | 0.052491  | 40.374    | 0.404   | 39.990    | 40.796    | 38.266    | 0.644   | 37.731    | 38.980    |
| 2129 | ENSG00000203666 | EFCAB2        | 1.2  | 0.0032288 | 0.0149492 | 3.735     | 0.172   | 3.605     | 3.929     | 3.094     | 0.274   | 2.928     | 3.410     |
| 2130 | ENSG00000186976 | EFCAB6        | 1.9  | 0.0355981 | 0.0980743 | 0.202     | 0.044   | 0.155     | 0.242     | 0.105     | 0.037   | 0.073     | 0.145     |
| 2131 | ENSG00000115380 | EFEMP1        | -1.2 | 0.0046486 | 0.0199904 | 18.960    | 1.844   | 17.190    | 20.870    | 22.580    | 1.133   | 21.277    | 23.336    |
| 2133 | ENSG00000183690 | EFHC2         | -1.2 | 0.1050396 | 0.220907  | 3.094     | 0.329   | 2.873     | 3.472     | 3.752     | 0.558   | 3.110     | 4.123     |
| 2134 | ENSG00000184349 | EFNA5         | -1.2 | 0.0026286 | 0.0126987 | 5.819     | 0.458   | 5.544     | 6.348     | 7.250     | 0.510   | 6.699     | 7.706     |
| 2135 | ENSG00000090776 | EFNB1         | -1.3 | 0.0051062 | 0.0214812 | 5.437     | 0.310   | 5.216     | 5.792     | 7.155     | 0.403   | 6.698     | 7.457     |
| 2136 | ENSG00000125266 | EFNB2         | -1.7 | 2.387E-10 | 1.412E-08 | 5.944     | 0.448   | 5.428     | 6.226     | 10.119    | 0.114   | 9.989     | 10.202    |
| 2137 | ENSG00000132294 | EFR3A         | 1.5  | 2.28E-14  | 3.82E-12  | 47.253    | 0.289   | 46.929    | 47.484    | 31.775    | 1.908   | 29.983    | 33.781    |
| 2138 | ENSG00000100842 | EFS           | -1.1 | 0.0733324 | 0.1697507 | 24.803    | 0.669   | 24.083    | 25.406    | 27.600    | 1.790   | 26.531    | 29.666    |
| 2139 | ENSG00000138798 | EGF           | 1.3  | 9.654E-05 | 0.0008779 | 5.872     | 0.691   | 5.082     | 6.366     | 4.451     | 0.194   | 4.233     | 4.603     |
| 2140 | ENSG00000146648 | EGFR          | 1.4  | 5.9E-05   | 0.0005866 | 2.149     | 0.023   | 2.124     | 2.170     | 1.578     | 0.191   | 1.411     | 1.786     |
| 2141 | ENSG00000269858 | EGLN2         | -1.2 | 0.0421872 | 0.1113818 | 3.813     | 0.355   | 3.602     | 4.223     | 4.488     | 0.213   | 4.339     | 4.732     |
| 2142 | ENSG00000129521 | EGLN3         | 1.4  | 3.994E-08 | 1.237E-06 | 7.911     | 0.446   | 7.403     | 8.240     | 5.715     | 0.096   | 5.647     | 5.825     |
| 2143 | ENSG00000120738 | EGR1          | 1.2  | 0.071302  | 0.1660898 | 194.133   | 16.992  | 174.887   | 207.062   | 169.267   | 19.939  | 149.509   | 189.383   |
| 2144 | ENSG00000179388 | EGR3          | 1.8  | 1.631E-07 | 4.179E-06 | 9.844     | 2.167   | 7.755     | 12.081    | 5.663     | 0.794   | 4.798     | 6.359     |
| 2145 | ENSG00000115504 | EHBP1         | -1.1 | 0.0983207 | 0.2106638 | 20.794    | 1.282   | 19.795    | 22.239    | 22.582    | 1.225   | 21.238    | 23.635    |
| 2146 | ENSG00000110047 | EHD1          | -1.2 | 0.005848  | 0.0239149 | 8.147     | 0.663   | 7.385     | 8.593     | 9.631     | 0.446   | 9.142     | 10.016    |



|      | A               | B         | C    | D         | E         | F       | G      | H       | I       | J       | K      | L       | M       |
|------|-----------------|-----------|------|-----------|-----------|---------|--------|---------|---------|---------|--------|---------|---------|
| 2147 | ENSG0000013016  | EHD3      | -1.1 | 0.0406865 | 0.1084183 | 9.855   | 0.521  | 9.384   | 10.414  | 11.296  | 0.777  | 10.619  | 12.145  |
| 2148 | ENSG00000113790 | EHHADH    | 1.5  | 1.493E-06 | 2.658E-05 | 6.838   | 0.379  | 6.403   | 7.104   | 4.766   | 0.283  | 4.559   | 5.089   |
| 2149 | ENSG00000204371 | EHMT2     | -1.1 | 0.0048941 | 0.0208078 | 46.406  | 0.818  | 45.879  | 47.348  | 51.487  | 1.442  | 50.073  | 52.956  |
| 2151 | ENSG00000255302 | EID1      | 1.1  | 0.0212692 | 0.0661748 | 196.541 | 4.828  | 191.714 | 201.370 | 186.924 | 7.808  | 181.847 | 195.915 |
| 2153 | ENSG00000176396 | EID2      | -1.1 | 0.05786   | 0.1418241 | 31.434  | 1.090  | 30.382  | 32.559  | 35.727  | 1.496  | 34.702  | 37.444  |
| 2154 | ENSG00000255150 | EID3      | -1.7 | 0.0174785 | 0.0567178 | 1.547   | 0.578  | 1.209   | 2.214   | 2.698   | 0.719  | 2.239   | 3.527   |
| 2155 | ENSG00000173812 | EIF1      | 1.1  | 0.0126281 | 0.0439488 | 161.793 | 7.351  | 153.554 | 167.680 | 153.914 | 2.364  | 152.377 | 156.636 |
| 2156 | ENSG00000173674 | EIF1AX    | 1.1  | 0.0143879 | 0.048854  | 165.226 | 4.386  | 160.761 | 169.529 | 156.664 | 2.644  | 153.808 | 159.027 |
| 2157 | ENSG00000114784 | EIF1B     | -1.1 | 0.0006    | 0.0038839 | 82.038  | 6.553  | 76.139  | 89.092  | 96.066  | 3.527  | 92.270  | 99.242  |
| 2158 | ENSG00000144895 | EIF2A     | -1.2 | 5.194E-05 | 0.0005279 | 68.093  | 2.766  | 65.062  | 70.481  | 80.156  | 3.028  | 77.481  | 83.443  |
| 2159 | ENSG00000055332 | EIF2AK2   | 1.2  | 1.713E-05 | 0.0002082 | 36.454  | 1.379  | 34.898  | 37.526  | 32.185  | 0.765  | 31.326  | 32.794  |
| 2160 | ENSG00000172071 | EIF2AK3   | 1.2  | 3.096E-05 | 0.0003427 | 20.635  | 0.338  | 20.269  | 20.935  | 17.566  | 0.803  | 16.837  | 18.427  |
| 2161 | ENSG00000119718 | EIF2B2    | -1.2 | 0.0019528 | 0.009981  | 13.381  | 0.788  | 12.769  | 14.269  | 15.839  | 0.749  | 15.114  | 16.609  |
| 2162 | ENSG00000115211 | EIF2B4    | -1.1 | 0.033055  | 0.092975  | 19.940  | 0.053  | 19.903  | 20.000  | 22.238  | 1.342  | 21.313  | 23.778  |
| 2163 | ENSG00000125977 | EIF2S2    | 1.2  | 7.201E-06 | 0.0001007 | 191.972 | 3.684  | 188.438 | 195.790 | 170.438 | 7.926  | 161.917 | 177.589 |
| 2164 | ENSG00000236493 | EIF2S2P3  | 1.2  | 0.0754627 | 0.1732221 | 9.659   | 1.109  | 8.475   | 10.673  | 8.056   | 0.356  | 7.684   | 8.395   |
| 2165 | ENSG00000128692 | EIF2S2P4  | 1.2  | 8.585E-06 | 0.0001169 | 340.156 | 4.733  | 334.888 | 344.050 | 297.048 | 16.703 | 278.376 | 310.567 |
| 2166 | ENSG00000130741 | EIF2S3    | 1.1  | 0.0002577 | 0.0019577 | 410.199 | 2.353  | 407.585 | 412.147 | 381.125 | 6.539  | 377.223 | 388.674 |
| 2167 | ENSG00000107581 | EIF3A     | -1.2 | 5.99E-11  | 4.105E-09 | 227.852 | 9.095  | 222.348 | 238.350 | 287.738 | 2.668  | 285.780 | 290.777 |
| 2168 | ENSG00000106263 | EIF3B     | -1.1 | 0.000295  | 0.0021831 | 88.331  | 2.605  | 85.323  | 89.841  | 99.868  | 3.925  | 97.382  | 104.393 |
| 2170 | ENSG00000100353 | EIF3D     | -1.1 | 0.0004498 | 0.0030651 | 141.637 | 3.006  | 139.797 | 145.105 | 160.401 | 4.497  | 155.898 | 164.891 |
| 2171 | ENSG00000104408 | EIF3E     | -1.1 | 0.0101648 | 0.0369674 | 228.896 | 4.146  | 225.829 | 233.613 | 250.626 | 4.877  | 245.029 | 253.962 |
| 2172 | ENSG00000175390 | EIF3F     | -1.1 | 0.0703714 | 0.1644593 | 37.607  | 1.181  | 36.247  | 38.372  | 40.704  | 2.290  | 38.980  | 43.302  |
| 2173 | ENSG00000233426 | EIF3FP3   | -1.2 | 0.0006082 | 0.0039244 | 147.852 | 8.062  | 141.890 | 157.024 | 174.821 | 3.887  | 171.778 | 179.201 |
| 2174 | ENSG00000147677 | EIF3H     | -1.1 | 0.0524527 | 0.1318567 | 109.150 | 1.521  | 108.231 | 110.906 | 117.318 | 1.461  | 115.658 | 118.408 |
| 2175 | ENSG00000084623 | EIF3I     | -1.1 | 0.0017839 | 0.0092922 | 228.631 | 2.505  | 226.889 | 231.502 | 255.425 | 0.615  | 254.871 | 256.087 |
| 2176 | ENSG00000104131 | EIF3J     | 1.1  | 0.0006862 | 0.0043062 | 82.662  | 1.854  | 80.531  | 83.904  | 75.167  | 1.700  | 73.255  | 76.507  |
| 2177 | ENSG00000149100 | EIF3M     | -1.1 | 0.0018917 | 0.0097422 | 81.171  | 1.073  | 80.530  | 82.409  | 90.360  | 3.031  | 87.864  | 93.733  |
| 2180 | ENSG00000161960 | EIF4A1    | -1.4 | 3.603E-05 | 0.0003886 | 3.260   | 0.033  | 3.222   | 3.279   | 4.749   | 0.285  | 4.426   | 4.966   |
| 2181 | ENSG00000229132 | EIF4A1P10 | -1.1 | 0.0612273 | 0.1479338 | 317.779 | 5.213  | 313.377 | 323.535 | 342.194 | 8.028  | 333.980 | 350.022 |
| 2182 | ENSG00000235001 | EIF4A1P2  | -1.1 | 0.0593875 | 0.1445211 | 97.409  | 2.050  | 95.670  | 99.670  | 108.340 | 7.101  | 101.797 | 115.892 |
| 2184 | ENSG00000156976 | EIF4A2    | -1.2 | 4.015E-08 | 1.241E-06 | 321.584 | 20.735 | 309.108 | 345.519 | 394.649 | 6.078  | 390.917 | 401.661 |
| 2187 | ENSG00000224781 | EIF4A2P4  | -1.4 | 0.000844  | 0.0050982 | 11.347  | 0.850  | 10.376  | 11.959  | 15.895  | 2.118  | 13.814  | 18.049  |
| 2189 | ENSG00000063046 | EIF4B     | -1.1 | 0.0002294 | 0.0017834 | 344.227 | 1.181  | 343.388 | 345.577 | 384.960 | 7.873  | 376.331 | 391.753 |
| 2190 | ENSG00000224546 | EIF4BP3   | -1.1 | 0.0928145 | 0.2025032 | 95.871  | 5.893  | 89.170  | 100.248 | 104.635 | 3.561  | 100.638 | 107.471 |
| 2191 | ENSG00000197258 | EIF4BP6   | -1.1 | 0.0423001 | 0.1116101 | 241.768 | 8.136  | 232.788 | 248.650 | 261.600 | 10.164 | 251.832 | 272.118 |
| 2192 | ENSG00000225031 | EIF4BP7   | -1.1 | 0.0395581 | 0.1060128 | 163.499 | 4.242  | 158.839 | 167.136 | 178.214 | 6.779  | 171.952 | 185.413 |
| 2193 | ENSG00000135930 | EIF4E2    | 1.1  | 0.0172291 | 0.0561115 | 40.510  | 0.874  | 39.649  | 41.397  | 38.316  | 2.006  | 36.926  | 40.615  |
| 2194 | ENSG00000163412 | EIF4E3    | 1.3  | 2.991E-05 | 0.0003328 | 7.895   | 0.919  | 6.890   | 8.694   | 6.289   | 0.178  | 6.100   | 6.455   |
| 2195 | ENSG00000187840 | EIF4EBP1  | 1.2  | 5.114E-06 | 7.568E-05 | 170.980 | 11.146 | 160.992 | 183.003 | 142.333 | 10.364 | 130.695 | 150.569 |
| 2196 | ENSG00000148730 | EIF4EBP2  | -1.2 | 5.514E-07 | 1.173E-05 | 110.877 | 0.764  | 110.362 | 111.754 | 131.270 | 5.430  | 125.200 | 135.666 |
| 2197 | ENSG00000243056 | EIF4EBP3  | -1.5 | 0.0388399 | 0.1045187 | 4.287   | 0.362  | 4.060   | 4.704   | 6.569   | 1.899  | 4.589   | 8.374   |

|      | A               | B         | C    | D         | E         | F       | G     | H       | I       | J       | K      | L       | M       |
|------|-----------------|-----------|------|-----------|-----------|---------|-------|---------|---------|---------|--------|---------|---------|
| 2199 | ENSG00000184708 | EIF4ENIF1 | -1.1 | 0.0070059 | 0.0275221 | 13.537  | 0.327 | 13.177  | 13.817  | 15.704  | 0.669  | 15.038  | 16.376  |
| 2200 | ENSG00000229944 | EIF4EP2   | -1.1 | 0.1185578 | 0.240801  | 319.985 | 5.506 | 314.229 | 325.202 | 344.239 | 15.819 | 326.468 | 356.783 |
| 2201 | ENSG00000114867 | EIF4G1    | 1.1  | 0.0117015 | 0.0413945 | 149.301 | 2.392 | 146.559 | 150.953 | 142.914 | 3.896  | 139.707 | 147.250 |
| 2202 | ENSG00000075151 | EIF4G3    | -1.1 | 0.0113008 | 0.0401958 | 45.597  | 1.185 | 44.745  | 46.951  | 50.005  | 0.986  | 48.875  | 50.696  |
| 2203 | ENSG00000106682 | EIF4H     | -1.1 | 0.0053102 | 0.0220992 | 295.147 | 4.230 | 290.281 | 297.939 | 323.289 | 6.817  | 315.426 | 327.544 |
| 2204 | ENSG00000233830 | EIF4HP1   | -1.1 | 0.0079182 | 0.0304018 | 270.422 | 5.520 | 265.380 | 276.321 | 302.305 | 14.138 | 293.750 | 318.624 |
| 2205 | ENSG00000100664 | EIF5      | 1.4  | 0.0004333 | 0.0029801 | 76.262  | 8.959 | 68.335  | 85.983  | 55.702  | 5.019  | 51.155  | 61.088  |
| 2207 | ENSG00000132507 | EIF5A     | -1   | 0.1066215 | 0.2233685 | 336.029 | 6.643 | 328.359 | 339.919 | 358.172 | 16.413 | 345.591 | 376.737 |
| 2208 | ENSG00000163577 | EIF5A2    | 1.2  | 0.0569469 | 0.1400325 | 4.475   | 0.275 | 4.182   | 4.728   | 3.957   | 0.447  | 3.443   | 4.250   |
| 2209 | ENSG00000215319 | EIF5P1    | 1.4  | 0.0923289 | 0.2018924 | 3.107   | 0.547 | 2.663   | 3.718   | 2.267   | 0.805  | 1.423   | 3.028   |
| 2212 | ENSG00000242372 | EIF6      | -1.1 | 0.0464359 | 0.1200322 | 82.734  | 1.955 | 80.503  | 84.149  | 91.525  | 5.221  | 86.247  | 96.686  |
| 2213 | ENSG00000006744 | ELAC2     | -1.2 | 4.397E-05 | 0.0004602 | 35.947  | 1.493 | 34.704  | 37.603  | 42.362  | 0.360  | 42.025  | 42.742  |
| 2214 | ENSG00000107105 | ELAVL2    | -1.1 | 0.0432151 | 0.1134404 | 9.307   | 0.464 | 8.928   | 9.824   | 10.669  | 0.919  | 9.608   | 11.202  |
| 2215 | ENSG00000196361 | ELAVL3    | -1.8 | 0.003578  | 0.0162367 | 0.550   | 0.064 | 0.496   | 0.621   | 0.995   | 0.099  | 0.881   | 1.052   |
| 2216 | ENSG00000234678 | ELF3-AS1  | -1.4 | 0.1096244 | 0.2278711 | 2.186   | 0.523 | 1.810   | 2.783   | 3.230   | 1.056  | 2.359   | 4.404   |
| 2217 | ENSG00000166897 | ELFN2     | -1.2 | 0.0427535 | 0.1124556 | 1.941   | 0.435 | 1.664   | 2.443   | 2.394   | 0.133  | 2.299   | 2.547   |
| 2218 | ENSG00000126767 | ELK1      | 1.2  | 0.0002615 | 0.0019804 | 34.163  | 1.406 | 32.544  | 35.076  | 29.737  | 0.108  | 29.661  | 29.861  |
| 2219 | ENSG00000158711 | ELK4      | -1.2 | 7.609E-06 | 0.0001056 | 16.198  | 1.757 | 14.251  | 17.667  | 20.403  | 1.206  | 19.058  | 21.387  |
| 2221 | ENSG00000118985 | ELL2      | 1.4  | 6.593E-09 | 2.605E-07 | 36.845  | 3.695 | 33.264  | 40.645  | 27.138  | 1.649  | 25.633  | 28.900  |
| 2222 | ENSG00000227295 | ELL2P1    | 1.3  | 0.0330419 | 0.0929692 | 5.233   | 0.312 | 4.880   | 5.472   | 4.160   | 0.271  | 3.952   | 4.465   |
| 2223 | ENSG00000179387 | ELMOD2    | 1.1  | 0.0030954 | 0.0144702 | 30.937  | 0.961 | 30.252  | 32.036  | 28.151  | 1.129  | 26.857  | 28.935  |
| 2224 | ENSG00000049540 | ELN       | -1.6 | 2.656E-05 | 0.0003013 | 1.585   | 0.103 | 1.490   | 1.694   | 2.586   | 0.349  | 2.372   | 2.988   |
| 2225 | ENSG00000011007 | ELOA      | -1.1 | 0.0330345 | 0.0929639 | 27.565  | 0.695 | 26.779  | 28.099  | 30.484  | 0.665  | 29.729  | 30.984  |
| 2227 | ENSG00000154582 | ELOC      | 1.1  | 0.0106045 | 0.0382254 | 32.021  | 0.665 | 31.600  | 32.788  | 29.734  | 1.343  | 28.784  | 31.270  |
| 2230 | ENSG00000197977 | ELOVL2    | 1.6  | 0.0174579 | 0.0566838 | 1.137   | 0.119 | 1.034   | 1.267   | 0.730   | 0.081  | 0.668   | 0.822   |
| 2231 | ENSG00000118402 | ELOVL4    | 1.2  | 0.004816  | 0.0205742 | 16.456  | 0.473 | 15.917  | 16.804  | 14.095  | 1.495  | 13.008  | 15.800  |
| 2232 | ENSG00000012660 | ELOVL5    | 1.1  | 0.0002609 | 0.0019771 | 202.687 | 3.877 | 198.412 | 205.975 | 188.028 | 1.782  | 185.970 | 189.090 |
| 2233 | ENSG00000170522 | ELOVL6    | 1.4  | 7.66E-15  | 1.44E-12  | 64.764  | 1.373 | 63.559  | 66.258  | 46.124  | 1.534  | 44.528  | 47.588  |
| 2234 | ENSG00000164181 | ELOVL7    | 1.2  | 0.0124746 | 0.0435016 | 13.886  | 0.254 | 13.609  | 14.109  | 12.225  | 1.181  | 10.928  | 13.239  |
| 2236 | ENSG00000134759 | ELP2      | -1.2 | 8.466E-06 | 0.0001156 | 41.316  | 1.643 | 39.467  | 42.608  | 48.649  | 0.825  | 47.959  | 49.562  |
| 2237 | ENSG00000109911 | ELP4      | -1.2 | 0.0019228 | 0.0098604 | 2.840   | 0.130 | 2.734   | 2.985   | 3.403   | 0.216  | 3.156   | 3.563   |
| 2239 | ENSG00000170291 | ELP5      | -1.1 | 0.0151466 | 0.0508181 | 30.414  | 0.539 | 29.870  | 30.949  | 34.359  | 0.927  | 33.763  | 35.427  |
| 2240 | ENSG00000170571 | EMB       | 1.4  | 2.88E-12  | 2.814E-10 | 38.641  | 1.078 | 37.434  | 39.506  | 27.753  | 1.196  | 26.419  | 28.729  |
| 2242 | ENSG00000231752 | EMBP1     | 1.2  | 0.019193  | 0.0609944 | 7.815   | 0.703 | 7.152   | 8.553   | 6.807   | 0.232  | 6.541   | 6.966   |
| 2243 | ENSG00000127463 | EMC1      | 1.2  | 2.874E-05 | 0.0003219 | 19.917  | 0.248 | 19.644  | 20.129  | 17.481  | 0.431  | 16.986  | 17.776  |
| 2246 | ENSG00000104412 | EMC2      | -1.1 | 0.0874258 | 0.1938428 | 31.166  | 3.107 | 27.583  | 33.096  | 34.823  | 2.742  | 32.079  | 37.562  |
| 2247 | ENSG00000125037 | EMC3      | 1.1  | 0.0962224 | 0.2076401 | 15.148  | 1.596 | 13.311  | 16.193  | 14.123  | 0.499  | 13.589  | 14.578  |
| 2248 | ENSG00000127774 | EMC6      | -1.1 | 0.0758845 | 0.1739779 | 66.700  | 5.100 | 63.399  | 72.574  | 76.565  | 9.208  | 69.067  | 86.843  |
| 2249 | ENSG00000134153 | EMC7      | 1.1  | 0.1114406 | 0.2304843 | 47.641  | 1.277 | 46.271  | 48.798  | 45.183  | 1.600  | 43.924  | 46.984  |
| 2250 | ENSG00000131148 | EMC8      | -1.1 | 0.0472203 | 0.1215763 | 20.871  | 1.557 | 19.786  | 22.655  | 23.555  | 1.855  | 22.208  | 25.671  |
| 2251 | ENSG00000100908 | EMC9      | 1.1  | 0.1052215 | 0.2211521 | 15.640  | 0.207 | 15.444  | 15.855  | 14.182  | 0.451  | 13.789  | 14.675  |
| 2252 | ENSG00000154920 | EME1      | -1.2 | 0.0010236 | 0.0059881 | 19.100  | 1.172 | 18.288  | 20.444  | 23.316  | 1.017  | 22.545  | 24.469  |
| 2253 | ENSG00000197774 | EME2      | -1.3 | 0.0005754 | 0.0037515 | 4.681   | 0.684 | 3.977   | 5.342   | 6.225   | 0.511  | 5.725   | 6.746   |

|      | A               | B            | C    | D         | E         | F       | G     | H       | I       | J       | K     | L       | M       |
|------|-----------------|--------------|------|-----------|-----------|---------|-------|---------|---------|---------|-------|---------|---------|
| 2254 | ENSG00000066629 | EML1         | 1.2  | 0.0084739 | 0.0319197 | 5.727   | 0.491 | 5.160   | 6.027   | 4.992   | 0.456 | 4.576   | 5.480   |
| 2255 | ENSG00000149499 | EML3         | -1.1 | 0.0888191 | 0.196127  | 9.180   | 0.804 | 8.494   | 10.065  | 10.557  | 1.231 | 9.241   | 11.680  |
| 2256 | ENSG00000143924 | EML4         | 1.1  | 0.0034045 | 0.0155959 | 78.078  | 2.293 | 76.248  | 80.651  | 73.345  | 3.104 | 70.012  | 76.154  |
| 2257 | ENSG00000134531 | EMP1         | 1.6  | 0.0134569 | 0.0462969 | 0.560   | 0.120 | 0.475   | 0.697   | 0.361   | 0.084 | 0.279   | 0.447   |
| 2258 | ENSG00000142227 | EMP3         | 1.4  | 1.933E-06 | 3.3E-05   | 34.325  | 3.370 | 31.374  | 37.996  | 25.745  | 1.114 | 25.060  | 27.030  |
| 2259 | ENSG00000158636 | EMSY         | -1.1 | 0.0522579 | 0.1314452 | 10.195  | 0.369 | 9.849   | 10.582  | 11.234  | 0.580 | 10.702  | 11.853  |
| 2261 | ENSG00000135638 | EMX1         | 1.3  | 0.0133932 | 0.0461436 | 4.081   | 0.600 | 3.643   | 4.764   | 3.276   | 0.693 | 2.478   | 3.721   |
| 2262 | ENSG00000171617 | ENC1         | 1.3  | 3.43E-05  | 0.0003733 | 8.952   | 0.881 | 7.964   | 9.659   | 6.983   | 0.586 | 6.310   | 7.379   |
| 2263 | ENSG00000167280 | ENGASE       | -1.1 | 0.0144327 | 0.0489669 | 12.960  | 0.793 | 12.278  | 13.829  | 15.055  | 0.232 | 14.896  | 15.321  |
| 2264 | ENSG00000108515 | ENO3         | -1.1 | 0.0969622 | 0.2085883 | 6.360   | 0.727 | 5.832   | 7.190   | 7.358   | 0.823 | 6.571   | 8.214   |
| 2265 | ENSG00000165675 | ENOX2        | 1.1  | 0.0184477 | 0.0591962 | 10.683  | 0.603 | 9.993   | 11.110  | 9.495   | 0.404 | 9.101   | 9.908   |
| 2266 | ENSG00000138792 | ENPEP        | -1.6 | 0.0227789 | 0.0698188 | 0.310   | 0.106 | 0.208   | 0.420   | 0.500   | 0.143 | 0.342   | 0.621   |
| 2268 | ENSG00000197594 | ENPP1        | 1.2  | 1.443E-06 | 2.576E-05 | 23.160  | 1.167 | 22.202  | 24.459  | 19.581  | 0.559 | 19.192  | 20.222  |
| 2269 | ENSG00000112796 | ENPP5        | 1.3  | 1.797E-05 | 0.0002167 | 20.291  | 1.380 | 19.334  | 21.873  | 16.313  | 0.648 | 15.588  | 16.836  |
| 2270 | ENSG00000143420 | ENSA         | 1    | 0.1206557 | 0.2438635 | 81.514  | 2.533 | 78.590  | 83.023  | 79.570  | 2.603 | 76.952  | 82.157  |
| 2271 | ENSG00000259032 | ENSAP2       | 1.1  | 0.038578  | 0.104029  | 113.213 | 6.215 | 107.867 | 120.033 | 102.449 | 5.393 | 96.400  | 106.755 |
| 2272 | ENSG00000138185 | ENTPD1       | 1.4  | 1.579E-05 | 0.0001942 | 5.280   | 0.301 | 4.934   | 5.482   | 3.879   | 0.493 | 3.340   | 4.307   |
| 2273 | ENSG00000054179 | ENTPD2       | -1.3 | 0.0184252 | 0.0591655 | 3.188   | 0.139 | 3.028   | 3.282   | 4.361   | 1.110 | 3.244   | 5.465   |
| 2274 | ENSG00000223797 | ENTPD3-AS1   | 1.4  | 0.0281781 | 0.0822819 | 3.016   | 0.897 | 2.365   | 4.039   | 2.252   | 0.367 | 1.860   | 2.588   |
| 2275 | ENSG00000197586 | ENTPD6       | 1.1  | 0.0018505 | 0.0095651 | 24.395  | 0.582 | 23.864  | 25.016  | 21.900  | 1.234 | 20.699  | 23.165  |
| 2276 | ENSG00000198018 | ENTPD7       | -1.2 | 0.015096  | 0.0506886 | 7.207   | 0.849 | 6.233   | 7.792   | 8.875   | 0.688 | 8.111   | 9.446   |
| 2277 | ENSG00000163378 | EOGT         | 1.5  | 3.77E-11  | 2.757E-09 | 19.765  | 0.554 | 19.293  | 20.375  | 13.637  | 0.816 | 12.903  | 14.516  |
| 2278 | ENSG00000100393 | EP300        | -1.1 | 0.0173956 | 0.0565752 | 36.395  | 2.653 | 33.332  | 37.961  | 40.064  | 1.617 | 38.397  | 41.627  |
| 2279 | ENSG00000183495 | EP400        | -1.1 | 0.0430116 | 0.112994  | 18.407  | 0.671 | 17.728  | 19.071  | 20.029  | 0.556 | 19.552  | 20.640  |
| 2280 | ENSG00000116016 | EPAS1        | 1.3  | 0.0212183 | 0.0660894 | 2.183   | 0.406 | 1.714   | 2.426   | 1.718   | 0.326 | 1.446   | 2.080   |
| 2281 | ENSG00000159023 | EPB41        | 1.2  | 9.811E-07 | 1.876E-05 | 53.674  | 2.145 | 51.392  | 55.648  | 46.941  | 0.317 | 46.667  | 47.288  |
| 2282 | ENSG00000079819 | EPB41L2      | 1.1  | 0.0172352 | 0.0561115 | 57.997  | 1.566 | 56.190  | 58.959  | 55.690  | 1.024 | 54.649  | 56.696  |
| 2283 | ENSG00000082397 | EPB41L3      | 1.3  | 4.234E-06 | 6.437E-05 | 9.486   | 0.668 | 8.977   | 10.243  | 7.728   | 0.144 | 7.590   | 7.878   |
| 2284 | ENSG00000224032 | EPB41L4A-AS1 | 1.1  | 0.0059378 | 0.0241933 | 25.612  | 1.512 | 23.880  | 26.668  | 23.062  | 0.820 | 22.158  | 23.759  |
| 2285 | ENSG00000095203 | EPB41L4B     | -1.1 | 0.0352211 | 0.0973579 | 19.199  | 0.394 | 18.777  | 19.557  | 21.124  | 0.050 | 21.090  | 21.181  |
| 2286 | ENSG00000119888 | EPCAM        | -1.1 | 0.0001055 | 0.0009435 | 208.150 | 2.512 | 205.764 | 210.770 | 237.095 | 3.034 | 234.490 | 240.426 |
| 2287 | ENSG00000086289 | EPDR1        | 1.4  | 0.0002922 | 0.0021657 | 9.655   | 0.550 | 9.027   | 10.053  | 7.289   | 0.948 | 6.526   | 8.351   |
| 2289 | ENSG00000146904 | EPHA1        | 1.1  | 0.0270373 | 0.0795825 | 84.595  | 2.015 | 82.378  | 86.316  | 81.184  | 2.348 | 79.504  | 83.867  |
| 2290 | ENSG00000229153 | EPHA1-AS1    | 1.2  | 0.0421622 | 0.1113332 | 4.037   | 0.382 | 3.611   | 4.347   | 3.459   | 0.661 | 2.844   | 4.158   |
| 2291 | ENSG00000142627 | EPHA2        | 1.3  | 0.0006567 | 0.0041679 | 33.418  | 1.805 | 31.544  | 35.145  | 27.114  | 4.259 | 22.255  | 30.197  |
| 2292 | ENSG00000116106 | EPHA4        | -1.5 | 5.554E-05 | 0.0005579 | 1.353   | 0.121 | 1.251   | 1.486   | 2.086   | 0.184 | 1.966   | 2.298   |
| 2294 | ENSG00000135333 | EPHA7        | -1.1 | 0.04571   | 0.1186091 | 3.827   | 0.184 | 3.717   | 4.040   | 4.446   | 0.318 | 4.163   | 4.791   |
| 2295 | ENSG00000070886 | EPHA8        | -1.4 | 0.0060952 | 0.0246621 | 1.983   | 0.522 | 1.681   | 2.586   | 2.746   | 0.340 | 2.394   | 3.072   |
| 2296 | ENSG00000154928 | EPHB1        | -1.6 | 3.262E-08 | 1.026E-06 | 2.776   | 0.299 | 2.443   | 3.020   | 4.669   | 0.415 | 4.287   | 5.110   |
| 2297 | ENSG00000196411 | EPHB4        | -1.1 | 0.0108771 | 0.0390086 | 36.692  | 1.009 | 35.540  | 37.423  | 41.285  | 2.693 | 38.686  | 44.064  |

|      | A               | B          | C    | D         | E         | F       | G      | H       | I       | J       | K      | L       | M       |
|------|-----------------|------------|------|-----------|-----------|---------|--------|---------|---------|---------|--------|---------|---------|
| 2298 | ENSG00000143819 | EPHX1      | 1.3  | 1.462E-07 | 3.799E-06 | 47.948  | 4.518  | 45.123  | 53.159  | 36.352  | 1.414  | 34.735  | 37.354  |
| 2299 | ENSG00000120915 | EPHX2      | 1.1  | 0.0643225 | 0.1535695 | 8.411   | 0.515  | 7.889   | 8.918   | 7.673   | 0.155  | 7.499   | 7.797   |
| 2300 | ENSG00000063245 | EPN1       | -1.1 | 0.0219386 | 0.067815  | 13.474  | 0.261  | 13.309  | 13.775  | 15.137  | 1.313  | 14.202  | 16.638  |
| 2302 | ENSG00000049283 | EPN3       | -1.6 | 0.0001643 | 0.0013614 | 1.574   | 0.242  | 1.380   | 1.845   | 2.587   | 0.345  | 2.242   | 2.931   |
| 2303 | ENSG00000187266 | EPOR       | -1.1 | 0.0968217 | 0.2083834 | 10.518  | 0.581  | 10.065  | 11.173  | 12.050  | 1.343  | 10.786  | 13.461  |
| 2304 | ENSG00000136628 | EPRS       | 1.1  | 0.0073906 | 0.0286822 | 177.911 | 3.854  | 173.733 | 181.327 | 169.751 | 5.590  | 163.307 | 173.302 |
| 2305 | ENSG00000085832 | EPS15      | 1.3  | 4.084E-10 | 2.217E-08 | 37.687  | 0.997  | 36.792  | 38.762  | 29.084  | 0.719  | 28.286  | 29.682  |
| 2307 | ENSG00000132591 | ERAL1      | -1.1 | 0.0831948 | 0.1870612 | 74.605  | 3.485  | 72.230  | 78.606  | 81.405  | 4.833  | 76.243  | 85.824  |
| 2308 | ENSG00000164307 | ERAP1      | 1.2  | 0.0016851 | 0.0089133 | 11.753  | 0.511  | 11.224  | 12.245  | 10.353  | 0.412  | 9.893   | 10.689  |
| 2309 | ENSG00000178568 | ERBB4      | -1.7 | 0.0061977 | 0.0249934 | 0.239   | 0.050  | 0.182   | 0.272   | 0.414   | 0.132  | 0.263   | 0.500   |
| 2310 | ENSG00000082805 | ERC1       | 1.1  | 0.0250392 | 0.0750466 | 9.390   | 0.587  | 8.814   | 9.988   | 8.742   | 0.520  | 8.166   | 9.175   |
| 2311 | ENSG00000225830 | ERCC6      | 1.1  | 0.0319918 | 0.0908    | 2.369   | 0.072  | 2.288   | 2.426   | 2.138   | 0.040  | 2.094   | 2.171   |
| 2312 | ENSG00000186871 | ERCC6L     | 1.1  | 0.1242509 | 0.2493125 | 26.845  | 1.217  | 26.117  | 28.250  | 25.780  | 1.182  | 24.704  | 27.046  |
| 2314 | ENSG00000049167 | ERCC8      | 1.1  | 0.0988609 | 0.2116255 | 13.495  | 0.633  | 12.879  | 14.143  | 12.598  | 0.838  | 11.983  | 13.552  |
| 2316 | ENSG00000105722 | ERF        | 1.1  | 0.0021725 | 0.0108101 | 41.928  | 0.966  | 40.821  | 42.593  | 37.236  | 3.999  | 32.668  | 40.108  |
| 2317 | ENSG00000157554 | ERG        | -1.5 | 0.0245886 | 0.074011  | 0.286   | 0.078  | 0.196   | 0.331   | 0.453   | 0.069  | 0.374   | 0.495   |
| 2318 | ENSG00000087502 | ERGIC2     | -1.1 | 0.0292651 | 0.0846522 | 19.591  | 0.754  | 18.872  | 20.375  | 21.990  | 1.896  | 20.241  | 24.005  |
| 2319 | ENSG00000125991 | ERGIC3     | -1.1 | 0.0342717 | 0.0954137 | 41.698  | 1.514  | 39.956  | 42.698  | 45.761  | 2.623  | 43.221  | 48.460  |
| 2320 | ENSG00000104626 | ERI1       | 1.1  | 0.1151937 | 0.2357541 | 14.065  | 0.635  | 13.524  | 14.764  | 13.429  | 0.168  | 13.239  | 13.560  |
| 2322 | ENSG00000117419 | ERI3       | -1.2 | 0.000346  | 0.0024798 | 46.619  | 3.678  | 43.142  | 50.470  | 55.663  | 3.861  | 52.239  | 59.848  |
| 2323 | ENSG00000104714 | ERICH1     | 1.1  | 0.0044404 | 0.0192863 | 12.036  | 0.540  | 11.693  | 12.658  | 10.863  | 0.637  | 10.302  | 11.556  |
| 2324 | ENSG00000240137 | ERICH6-AS1 | 1.9  | 0.022087  | 0.0680681 | 2.510   | 0.908  | 1.607   | 3.423   | 1.345   | 0.301  | 1.135   | 1.690   |
| 2328 | ENSG00000068912 | ERLEC1     | -1.1 | 0.1079195 | 0.2254234 | 53.735  | 0.583  | 53.179  | 54.341  | 58.404  | 2.675  | 55.753  | 61.102  |
| 2329 | ENSG00000107566 | ERLIN1     | 1.1  | 0.0205927 | 0.064581  | 35.452  | 0.735  | 34.854  | 36.272  | 33.586  | 0.383  | 33.348  | 34.029  |
| 2330 | ENSG00000130023 | ERMARD     | -1.1 | 0.0286815 | 0.0833488 | 8.912   | 1.192  | 7.919   | 10.234  | 10.435  | 0.129  | 10.302  | 10.559  |
| 2331 | ENSG00000197930 | ERO1A      | 1.1  | 0.0688883 | 0.1618206 | 30.890  | 0.576  | 30.397  | 31.523  | 29.847  | 0.997  | 28.698  | 30.475  |
| 2332 | ENSG00000086619 | ERO1B      | -1.1 | 0.1149648 | 0.2355422 | 5.278   | 0.522  | 4.685   | 5.669   | 5.983   | 0.248  | 5.776   | 6.257   |
| 2333 | ENSG00000089248 | ERP29      | 1.3  | 2.29E-10  | 1.361E-08 | 160.950 | 4.015  | 156.605 | 164.521 | 128.812 | 5.915  | 124.313 | 135.512 |
| 2334 | ENSG00000233347 | ERP29P1    | 1.4  | 9.564E-05 | 0.000872  | 30.448  | 4.247  | 27.750  | 35.343  | 21.520  | 2.103  | 19.827  | 23.875  |
| 2335 | ENSG00000116285 | ERRFI1     | -1.2 | 0.0001019 | 0.0009177 | 16.923  | 0.996  | 16.194  | 18.059  | 21.138  | 1.644  | 19.336  | 22.557  |
| 2336 | ENSG00000233056 | ERVH48-1   | 1.3  | 0.110953  | 0.2299141 | 2.189   | 0.525  | 1.715   | 2.753   | 1.768   | 0.342  | 1.409   | 2.091   |
| 2337 | ENSG00000267696 | ERVK-28    | 1.6  | 4.306E-06 | 6.523E-05 | 31.637  | 3.128  | 28.115  | 34.091  | 19.865  | 0.558  | 19.252  | 20.343  |
| 2338 | ENSG00000269526 | ERVV-1     | 3.6  | 0.000462  | 0.0031369 | 0.706   | 0.031  | 0.677   | 0.738   | 0.194   | 0.045  | 0.142   | 0.227   |
| 2339 | ENSG00000268964 | ERVV-2     | 2.7  | 0.0018524 | 0.0095722 | 0.762   | 0.051  | 0.729   | 0.820   | 0.281   | 0.128  | 0.137   | 0.383   |
| 2340 | ENSG00000171320 | ESCO2      | 1.1  | 0.0387841 | 0.1044016 | 6.971   | 0.825  | 6.353   | 7.907   | 6.341   | 0.240  | 6.133   | 6.603   |
| 2341 | ENSG00000135476 | ESPL1      | -1.4 | 7.86E-12  | 6.957E-10 | 17.954  | 0.648  | 17.446  | 18.684  | 25.968  | 1.515  | 24.946  | 27.708  |
| 2343 | ENSG00000144488 | ESPNL      | -1.4 | 0.0376325 | 0.102098  | 1.059   | 0.344  | 0.716   | 1.404   | 1.470   | 0.225  | 1.214   | 1.633   |
| 2344 | ENSG00000268869 | ESPNP      | 1.5  | 0.0204117 | 0.0640844 | 1.725   | 0.288  | 1.395   | 1.922   | 1.217   | 0.239  | 0.953   | 1.418   |
| 2345 | ENSG00000265992 | ESRG       | -1.4 | 4.17E-12  | 3.788E-10 | 475.344 | 14.560 | 460.110 | 489.119 | 687.543 | 53.367 | 631.723 | 738.063 |
| 2346 | ENSG00000104413 | ESRP1      | -1.2 | 9.776E-07 | 1.873E-05 | 115.228 | 2.211  | 112.740 | 116.965 | 136.665 | 3.468  | 134.198 | 140.630 |
| 2347 | ENSG00000103067 | ESRP2      | -1.1 | 0.0498041 | 0.1265719 | 24.968  | 0.550  | 24.630  | 25.603  | 27.481  | 1.055  | 26.493  | 28.592  |
| 2348 | ENSG00000173153 | ESRRA      | -1.3 | 0.0004009 | 0.0028004 | 17.255  | 2.306  | 15.700  | 19.905  | 22.786  | 2.659  | 19.784  | 24.845  |

|      | A               | B       | C    | D         | E         | F       | G      | H       | I       | J       | K     | L       | M       |
|------|-----------------|---------|------|-----------|-----------|---------|--------|---------|---------|---------|-------|---------|---------|
| 2349 | ENSG00000196482 | ESRRG   | -1.2 | 0.0687401 | 0.1615622 | 0.715   | 0.080  | 0.623   | 0.765   | 0.901   | 0.011 | 0.889   | 0.911   |
| 2350 | ENSG00000139641 | ESYT1   | 1.1  | 0.0010363 | 0.00605   | 50.868  | 1.681  | 48.973  | 52.178  | 46.287  | 3.198 | 42.595  | 48.175  |
| 2351 | ENSG00000117868 | ESYT2   | 2.1  | 2.22E-22  | 2.21E-19  | 169.339 | 11.336 | 160.021 | 181.960 | 82.211  | 4.340 | 78.525  | 86.994  |
| 2354 | ENSG00000158220 | ESYT3   | 1.2  | 0.0205853 | 0.0645697 | 3.048   | 0.139  | 2.944   | 3.206   | 2.654   | 0.105 | 2.533   | 2.725   |
| 2355 | ENSG00000143971 | ETAA1   | -1.1 | 0.0928532 | 0.2025032 | 52.401  | 2.322  | 50.772  | 55.060  | 57.941  | 4.361 | 54.395  | 62.810  |
| 2356 | ENSG00000140374 | ETFA    | 1.1  | 0.0570089 | 0.1401645 | 44.446  | 1.018  | 43.698  | 45.605  | 42.695  | 0.830 | 42.128  | 43.648  |
| 2357 | ENSG00000105379 | ETFB    | 1.1  | 0.1050275 | 0.220907  | 5.182   | 0.168  | 4.990   | 5.300   | 4.745   | 0.634 | 4.015   | 5.153   |
| 2358 | ENSG00000205707 | ETFRF1  | 1.3  | 0.0013028 | 0.0072475 | 10.168  | 0.801  | 9.244   | 10.657  | 7.733   | 1.445 | 6.089   | 8.798   |
| 2359 | ENSG00000139163 | ETNK1   | 1.1  | 0.0028903 | 0.0136469 | 37.678  | 0.457  | 37.251  | 38.159  | 33.727  | 1.811 | 31.701  | 35.187  |
| 2360 | ENSG00000157557 | ETS2    | -1.2 | 0.0001364 | 0.001162  | 15.964  | 1.058  | 14.753  | 16.708  | 19.741  | 1.521 | 18.048  | 20.993  |
| 2361 | ENSG00000006468 | ETV1    | 1.2  | 0.000142  | 0.0012025 | 20.611  | 0.968  | 19.497  | 21.250  | 18.255  | 0.482 | 17.810  | 18.766  |
| 2362 | ENSG00000117036 | ETV3    | -1.1 | 0.0958263 | 0.2070666 | 13.525  | 0.702  | 13.021  | 14.328  | 14.888  | 0.714 | 14.318  | 15.688  |
| 2363 | ENSG00000175832 | ETV4    | 1.1  | 0.0491549 | 0.1254996 | 71.239  | 2.879  | 68.607  | 74.314  | 67.208  | 8.375 | 60.320  | 76.530  |
| 2364 | ENSG00000244405 | ETV5    | 1.2  | 6.686E-06 | 9.47E-05  | 16.407  | 0.392  | 15.991  | 16.770  | 13.450  | 0.937 | 12.393  | 14.179  |
| 2365 | ENSG00000010030 | ETV7    | 1.6  | 0.0008163 | 0.00495   | 4.452   | 0.464  | 4.045   | 4.958   | 2.882   | 0.356 | 2.671   | 3.294   |
| 2366 | ENSG00000115363 | EVA1A   | -1.4 | 0.0274929 | 0.080587  | 1.259   | 0.188  | 1.077   | 1.453   | 1.863   | 0.214 | 1.641   | 2.068   |
| 2367 | ENSG00000142694 | EVA1B   | -1.3 | 0.0203465 | 0.0639177 | 10.966  | 1.237  | 9.882   | 12.314  | 14.074  | 1.388 | 12.952  | 15.627  |
| 2369 | ENSG00000187609 | EXD3    | -1.2 | 0.008545  | 0.0321015 | 3.134   | 0.153  | 3.001   | 3.302   | 3.976   | 0.199 | 3.829   | 4.202   |
| 2371 | ENSG00000174371 | EXO1    | -1.1 | 0.0966453 | 0.208145  | 21.713  | 2.329  | 20.257  | 24.399  | 23.974  | 1.141 | 22.657  | 24.670  |
| 2372 | ENSG00000090989 | EXOC1   | 1.1  | 0.1226615 | 0.2469144 | 26.564  | 0.620  | 25.996  | 27.226  | 25.528  | 0.677 | 24.833  | 26.186  |
| 2374 | ENSG00000131558 | EXOC4   | -1.1 | 0.0509011 | 0.1287594 | 25.839  | 0.238  | 25.623  | 26.094  | 28.173  | 1.245 | 27.240  | 29.586  |
| 2375 | ENSG00000144036 | EXOC6B  | -1.1 | 0.000663  | 0.0041967 | 21.097  | 0.504  | 20.516  | 21.405  | 24.464  | 1.681 | 22.556  | 25.728  |
| 2376 | ENSG00000182473 | EXOC7   | 1.1  | 0.027753  | 0.0812087 | 23.316  | 0.287  | 22.997  | 23.553  | 22.128  | 1.590 | 20.336  | 23.368  |
| 2377 | ENSG00000116903 | EXOC8   | -1.1 | 0.0408478 | 0.1086257 | 7.954   | 1.053  | 6.777   | 8.806   | 9.279   | 0.547 | 8.648   | 9.621   |
| 2378 | ENSG00000157036 | EXOG    | 1.1  | 0.0397062 | 0.1063254 | 8.670   | 0.752  | 7.802   | 9.136   | 7.779   | 1.099 | 7.047   | 9.043   |
| 2379 | ENSG00000171824 | EXOSC10 | -1.1 | 0.0059637 | 0.0242812 | 37.429  | 1.332  | 36.523  | 38.959  | 41.820  | 0.594 | 41.256  | 42.440  |
| 2380 | ENSG00000107371 | EXOSC3  | -1.1 | 0.0516256 | 0.1301064 | 27.552  | 0.524  | 27.057  | 28.101  | 30.520  | 0.906 | 29.847  | 31.550  |
| 2381 | ENSG00000077348 | EXOSC5  | -1.2 | 0.0020736 | 0.0104407 | 48.910  | 2.578  | 46.069  | 51.100  | 58.289  | 3.329 | 56.078  | 62.118  |
| 2382 | ENSG00000223496 | EXOSC6  | -1.3 | 2.027E-05 | 0.0002398 | 12.082  | 1.051  | 11.105  | 13.194  | 15.831  | 1.492 | 14.145  | 16.979  |
| 2383 | ENSG00000123737 | EXOSC9  | 1.1  | 0.0370642 | 0.1009773 | 44.039  | 0.939  | 43.093  | 44.971  | 42.024  | 1.776 | 40.104  | 43.608  |
| 2384 | ENSG00000110723 | EXPH5   | -1.2 | 0.0192825 | 0.0611983 | 1.772   | 0.227  | 1.552   | 2.006   | 2.207   | 0.304 | 1.919   | 2.524   |
| 2385 | ENSG00000182197 | EXT1    | 1.2  | 0.0046165 | 0.0198824 | 10.425  | 0.590  | 9.968   | 11.092  | 9.262   | 0.105 | 9.141   | 9.327   |
| 2386 | ENSG00000151348 | EXT2    | 1.1  | 0.0096565 | 0.0354198 | 42.431  | 1.867  | 41.199  | 44.579  | 39.585  | 2.475 | 37.633  | 42.369  |
| 2387 | ENSG00000012232 | EXTL3   | 1.1  | 0.0057498 | 0.0236091 | 34.242  | 0.622  | 33.550  | 34.756  | 32.248  | 1.648 | 31.154  | 34.143  |
| 2388 | ENSG00000158161 | EYA3    | -1.2 | 0.0013133 | 0.0072824 | 12.271  | 1.210  | 10.886  | 13.126  | 14.742  | 0.356 | 14.445  | 15.136  |
| 2389 | ENSG00000108799 | EZH1    | -1.2 | 2.292E-05 | 0.0002673 | 12.668  | 0.084  | 12.600  | 12.762  | 15.744  | 0.179 | 15.557  | 15.913  |
| 2390 | ENSG00000106462 | EZH2    | -1.2 | 0.0007381 | 0.0045612 | 25.963  | 2.286  | 23.573  | 28.130  | 30.773  | 0.676 | 30.016  | 31.314  |
| 2392 | ENSG00000092820 | EZR     | 1.1  | 6.674E-06 | 9.461E-05 | 283.266 | 6.809  | 276.661 | 290.263 | 254.477 | 8.314 | 248.932 | 264.037 |
| 2393 | ENSG00000158769 | F11R    | -1.1 | 5.936E-06 | 8.573E-05 | 103.376 | 1.346  | 102.121 | 104.798 | 120.484 | 2.532 | 117.588 | 122.285 |
| 2394 | ENSG00000181104 | F2R     | -1.1 | 0.0366504 | 0.1002699 | 26.314  | 0.719  | 25.580  | 27.016  | 29.374  | 1.187 | 28.417  | 30.701  |
| 2395 | ENSG00000164251 | F2RL1   | -1.1 | 0.0187209 | 0.0598313 | 33.578  | 2.090  | 31.882  | 35.913  | 37.893  | 1.097 | 36.830  | 39.020  |
| 2396 | ENSG00000117525 | F3      | 2    | 1.095E-10 | 7.013E-09 | 11.264  | 0.626  | 10.675  | 11.922  | 5.838   | 0.080 | 5.780   | 5.930   |
| 2398 | ENSG00000103089 | FA2H    | 1.7  | 0.0006105 | 0.0039364 | 2.636   | 0.289  | 2.386   | 2.953   | 1.608   | 0.360 | 1.192   | 1.832   |

|      | A               | B             | C    | D         | E         | F       | G      | H       | I       | J      | K     | L      | M      |
|------|-----------------|---------------|------|-----------|-----------|---------|--------|---------|---------|--------|-------|--------|--------|
| 2399 | ENSG00000165591 | FAAH2         | 1.3  | 0.021484  | 0.0666959 | 6.504   | 0.396  | 6.198   | 6.952   | 5.300  | 0.442 | 4.923  | 5.786  |
| 2400 | ENSG00000121769 | FABP3         | 1.8  | 1.47E-14  | 0.62E-12  | 74.057  | 4.557  | 70.513  | 79.198  | 42.144 | 0.074 | 42.079 | 42.225 |
| 2401 | ENSG00000236972 | FABP5P1       | 1.2  | 0.0416902 | 0.110328  | 44.074  | 1.839  | 42.593  | 46.133  | 38.096 | 2.057 | 35.732 | 39.486 |
| 2403 | ENSG00000164434 | FABP7         | 1.2  | 0.0643953 | 0.1536782 | 7.349   | 1.011  | 6.278   | 8.286   | 6.347  | 0.978 | 5.383  | 7.338  |
| 2404 | ENSG00000149485 | FADS1         | 1.4  | 2.91E-14  | 4.78E-12  | 62.422  | 0.699  | 61.808  | 63.183  | 46.497 | 1.978 | 44.226 | 47.835 |
| 2405 | ENSG00000134824 | FADS2         | 1.5  | 3.52E-18  | 1.49E-15  | 103.281 | 1.968  | 101.030 | 104.675 | 70.688 | 3.291 | 67.786 | 74.263 |
| 2409 | ENSG00000115042 | FAHD2A        | 1.1  | 0.0112011 | 0.0399249 | 19.853  | 0.526  | 19.334  | 20.386  | 18.062 | 0.986 | 17.278 | 19.169 |
| 2410 | ENSG00000231584 | FAHD2CP       | 1.2  | 0.0192392 | 0.0610951 | 19.684  | 0.690  | 18.996  | 20.375  | 17.449 | 1.254 | 16.578 | 18.886 |
| 2411 | ENSG00000158234 | FAIM          | 1.3  | 0.0028124 | 0.0133912 | 4.391   | 0.530  | 3.882   | 4.939   | 3.435  | 0.152 | 3.318  | 3.607  |
| 2412 | ENSG00000167106 | FAM102A       | -1.3 | 1.921E-06 | 3.282E-05 | 13.769  | 0.473  | 13.321  | 14.263  | 18.128 | 1.331 | 16.798 | 19.460 |
| 2414 | ENSG00000169612 | FAM103A1      | 1.1  | 0.1047621 | 0.2205428 | 29.518  | 0.810  | 28.837  | 30.414  | 27.525 | 0.648 | 27.031 | 28.258 |
| 2416 | ENSG00000235272 | FAM103A2<br>P | 1.1  | 0.0807749 | 0.1826643 | 94.445  | 11.606 | 81.173  | 102.690 | 84.962 | 3.402 | 82.029 | 88.692 |
| 2417 | ENSG00000133193 | FAM104A       | -1.1 | 0.0304123 | 0.0871359 | 23.765  | 0.717  | 23.035  | 24.467  | 26.905 | 1.688 | 25.621 | 28.817 |
| 2418 | ENSG00000145569 | FAM105A       | 1.1  | 0.0448848 | 0.1169163 | 8.886   | 0.980  | 8.014   | 9.947   | 7.960  | 0.747 | 7.395  | 8.807  |
| 2420 | ENSG00000065809 | FAM107B       | 1.2  | 0.0008113 | 0.004925  | 13.995  | 0.977  | 12.969  | 14.914  | 12.241 | 0.231 | 12.055 | 12.500 |
| 2422 | ENSG00000198324 | FAM109A       | -1.2 | 0.0205316 | 0.0644132 | 7.477   | 0.056  | 7.424   | 7.536   | 9.015  | 1.270 | 8.132  | 10.470 |
| 2423 | ENSG00000125898 | FAM110A       | -1.2 | 0.0466936 | 0.1205265 | 4.680   | 0.247  | 4.448   | 4.939   | 5.762  | 0.538 | 5.150  | 6.162  |
| 2425 | ENSG00000184731 | FAM110C       | 1.6  | 2.527E-09 | 1.116E-07 | 13.610  | 0.800  | 12.841  | 14.437  | 8.649  | 0.660 | 7.945  | 9.253  |
| 2426 | ENSG00000166801 | FAM111A       | 1.4  | 1.043E-08 | 3.885E-07 | 17.029  | 1.267  | 15.683  | 18.198  | 12.751 | 0.196 | 12.526 | 12.887 |
| 2427 | ENSG00000189057 | FAM111B       | 1.2  | 0.0147011 | 0.0496384 | 10.735  | 0.535  | 10.259  | 11.313  | 9.414  | 0.981 | 8.502  | 10.452 |
| 2428 | ENSG00000121104 | FAM117A       | 1.1  | 0.1150307 | 0.2356484 | 18.961  | 0.431  | 18.706  | 19.458  | 18.018 | 0.992 | 17.402 | 19.163 |
| 2429 | ENSG00000138439 | FAM117B       | -1.2 | 2.625E-05 | 0.0002986 | 17.986  | 1.619  | 16.254  | 19.463  | 22.397 | 0.667 | 21.637 | 22.888 |
| 2430 | ENSG00000100376 | FAM118A       | 1.1  | 0.0605474 | 0.1466883 | 12.009  | 0.543  | 11.565  | 12.614  | 11.223 | 0.618 | 10.866 | 11.936 |
| 2431 | ENSG00000048828 | FAM120A       | 1.2  | 4.661E-06 | 6.983E-05 | 39.364  | 0.757  | 38.586  | 40.098  | 34.355 | 1.397 | 33.231 | 35.919 |
| 2432 | ENSG00000188938 | FAM120A<br>OS | 1.1  | 0.0350792 | 0.0971182 | 22.283  | 2.514  | 20.282  | 25.104  | 20.433 | 1.546 | 19.486 | 22.216 |
| 2434 | ENSG00000156500 | FAM122C       | -1.2 | 0.1182355 | 0.2403218 | 1.421   | 0.192  | 1.303   | 1.643   | 1.755  | 0.380 | 1.406  | 2.161  |
| 2435 | ENSG00000150510 | FAM124A       | -1.4 | 7.513E-09 | 2.888E-07 | 9.973   | 1.078  | 9.270   | 11.213  | 14.690 | 1.248 | 13.471 | 15.966 |
| 2436 | ENSG00000124019 | FAM124B       | -1.2 | 0.1002754 | 0.2136431 | 1.799   | 0.068  | 1.752   | 1.876   | 2.281  | 0.580 | 1.710  | 2.871  |
| 2438 | ENSG00000122591 | FAM126A       | 1.2  | 4.308E-06 | 6.523E-05 | 31.015  | 2.681  | 28.463  | 33.808  | 25.830 | 0.692 | 25.107 | 26.485 |
| 2439 | ENSG00000135842 | FAM129A       | 1.7  | 3.02E-12  | 2.918E-10 | 8.533   | 0.404  | 8.293   | 9.000   | 5.088  | 0.524 | 4.600  | 5.642  |
| 2443 | ENSG00000136830 | FAM129B       | 1.1  | 0.0137402 | 0.0470623 | 50.285  | 2.776  | 48.600  | 53.489  | 46.961 | 3.547 | 44.741 | 51.052 |
| 2444 | ENSG00000159784 | FAM131B       | 1.1  | 0.1204302 | 0.2435289 | 27.478  | 1.576  | 25.671  | 28.569  | 26.434 | 1.942 | 24.397 | 28.264 |
| 2445 | ENSG00000035141 | FAM136A       | 1.1  | 0.0020091 | 0.010201  | 77.193  | 4.170  | 73.367  | 81.638  | 70.741 | 0.703 | 69.964 | 71.334 |
| 2446 | ENSG00000138640 | FAM13A        | 1.1  | 0.0922908 | 0.2018772 | 6.602   | 0.163  | 6.417   | 6.726   | 6.263  | 0.604 | 5.805  | 6.947  |
| 2447 | ENSG00000138286 | FAM149B1      | 1.1  | 0.014315  | 0.0486849 | 9.658   | 0.491  | 9.236   | 10.197  | 8.787  | 0.330 | 8.497  | 9.146  |

|      | A               | B        | C    | D         | E         | F      | G     | H      | I      | J      | K     | L      | M      |
|------|-----------------|----------|------|-----------|-----------|--------|-------|--------|--------|--------|-------|--------|--------|
| 2448 | ENSG00000204442 | FAM155A  | 1.2  | 0.0083987 | 0.0317228 | 3.136  | 0.312 | 2.778  | 3.353  | 2.616  | 0.190 | 2.411  | 2.787  |
| 2450 | ENSG00000130054 | FAM155B  | 1.2  | 0.0078155 | 0.0300691 | 13.229 | 1.024 | 12.104 | 14.108 | 11.617 | 0.994 | 10.526 | 12.471 |
| 2451 | ENSG00000158863 | FAM160B2 | 1.2  | 0.0150244 | 0.0504985 | 5.250  | 0.316 | 4.979  | 5.597  | 4.564  | 0.400 | 4.214  | 5.000  |
| 2452 | ENSG00000170264 | FAM161A  | 1.1  | 0.1081167 | 0.2256797 | 12.276 | 0.894 | 11.695 | 13.306 | 11.590 | 0.749 | 10.911 | 12.393 |
| 2453 | ENSG00000114023 | FAM162A  | -1.2 | 9.826E-07 | 1.876E-05 | 30.880 | 1.110 | 30.012 | 32.130 | 38.914 | 2.577 | 37.003 | 41.844 |
| 2454 | ENSG00000196990 | FAM163B  | -1.4 | 0.0707379 | 0.1651104 | 2.557  | 0.760 | 1.965  | 3.414  | 3.609  | 1.082 | 2.543  | 4.706  |
| 2455 | ENSG00000183615 | FAM167B  | -1.4 | 0.0029084 | 0.0137093 | 9.809  | 1.210 | 8.997  | 11.200 | 14.141 | 1.406 | 12.610 | 15.373 |
| 2456 | ENSG00000054965 | FAM168A  | -1.2 | 2.851E-06 | 4.575E-05 | 13.522 | 0.346 | 13.123 | 13.731 | 17.000 | 0.541 | 16.462 | 17.544 |
| 2458 | ENSG00000152102 | FAM168B  | -1   | 0.1072238 | 0.2243014 | 57.649 | 1.017 | 56.677 | 58.705 | 61.715 | 2.454 | 58.891 | 63.337 |
| 2459 | ENSG00000198780 | FAM169A  | 1.3  | 5.083E-06 | 7.534E-05 | 59.309 | 5.896 | 55.887 | 66.117 | 46.909 | 2.894 | 43.986 | 49.774 |
| 2463 | ENSG00000144369 | FAM171B  | 1.1  | 0.0145069 | 0.0491892 | 14.252 | 0.729 | 13.451 | 14.876 | 12.794 | 1.330 | 11.489 | 14.147 |
| 2464 | ENSG00000185442 | FAM174B  | 1.2  | 0.0028488 | 0.0134888 | 8.927  | 0.095 | 8.862  | 9.036  | 7.436  | 0.654 | 6.916  | 8.170  |
| 2466 | ENSG00000163322 | FAM175A  | -1.1 | 0.0264957 | 0.0783164 | 17.226 | 1.071 | 16.337 | 18.415 | 19.288 | 0.921 | 18.361 | 20.204 |
| 2467 | ENSG00000104059 | FAM189A1 | 1.2  | 0.0117274 | 0.0414601 | 5.235  | 0.222 | 5.062  | 5.485  | 4.477  | 0.335 | 4.153  | 4.823  |
| 2468 | ENSG00000135063 | FAM189A2 | 1.3  | 0.0006375 | 0.004074  | 12.369 | 1.900 | 10.818 | 14.489 | 9.983  | 1.001 | 8.896  | 10.868 |
| 2469 | ENSG00000160767 | FAM189B  | -1.1 | 0.0693398 | 0.16261   | 19.817 | 0.946 | 19.211 | 20.907 | 22.080 | 1.606 | 20.299 | 23.418 |
| 2470 | ENSG00000125386 | FAM193A  | -1.1 | 0.0541684 | 0.135072  | 8.162  | 0.719 | 7.728  | 8.992  | 9.276  | 0.381 | 8.882  | 9.641  |
| 2471 | ENSG00000146067 | FAM193B  | -1.4 | 3.088E-10 | 1.776E-08 | 16.341 | 0.234 | 16.197 | 16.611 | 23.369 | 1.306 | 21.914 | 24.441 |
| 2472 | ENSG00000219438 | FAM19A5  | 1.2  | 0.0193977 | 0.0614946 | 13.775 | 1.446 | 12.191 | 15.025 | 12.133 | 0.653 | 11.435 | 12.728 |
| 2473 | ENSG00000221909 | FAM200A  | -1.1 | 0.0574864 | 0.1410891 | 9.992  | 1.034 | 8.883  | 10.930 | 11.648 | 0.484 | 11.317 | 12.203 |
| 2474 | ENSG00000204860 | FAM201A  | 1.2  | 0.0029187 | 0.0137541 | 8.419  | 0.120 | 8.290  | 8.526  | 6.921  | 0.755 | 6.136  | 7.643  |
| 2475 | ENSG00000119328 | FAM206A  | 1.2  | 0.0239559 | 0.0725584 | 13.233 | 1.587 | 11.463 | 14.531 | 11.541 | 1.402 | 9.984  | 12.702 |
| 2476 | ENSG00000163946 | FAM208A  | 1.1  | 0.0221262 | 0.0681393 | 23.992 | 0.425 | 23.537 | 24.378 | 22.739 | 0.878 | 21.768 | 23.477 |
| 2477 | ENSG00000108021 | FAM208B  | -1.1 | 0.0012885 | 0.0071876 | 26.832 | 1.246 | 25.583 | 28.074 | 30.762 | 1.776 | 29.019 | 32.570 |
| 2478 | ENSG00000108950 | FAM20A   | 2.2  | 8.435E-06 | 0.0001153 | 1.504  | 0.336 | 1.190  | 1.858  | 0.702  | 0.027 | 0.673  | 0.726  |
| 2479 | ENSG00000124098 | FAM210B  | 1.1  | 0.0182567 | 0.0587697 | 23.337 | 2.862 | 21.395 | 26.623 | 20.742 | 2.505 | 17.869 | 22.474 |
| 2480 | ENSG00000197852 | FAM212B  | -1.1 | 0.0267249 | 0.0788415 | 10.756 | 0.417 | 10.293 | 11.101 | 12.028 | 0.089 | 11.973 | 12.130 |
| 2483 | ENSG00000122378 | FAM213A  | 1.3  | 7.16E-11  | 4.808E-09 | 34.847 | 1.023 | 34.253 | 36.028 | 26.807 | 0.467 | 26.518 | 27.346 |
| 2484 | ENSG00000196227 | FAM217B  | 1.1  | 0.0529067 | 0.1326826 | 14.040 | 0.899 | 13.009 | 14.655 | 13.119 | 0.164 | 12.948 | 13.275 |
| 2485 | ENSG00000250486 | FAM218A  | 1.4  | 0.0107828 | 0.0387527 | 5.426  | 0.485 | 4.891  | 5.838  | 4.044  | 0.901 | 3.380  | 5.070  |
| 2486 | ENSG00000164970 | FAM219A  | 1.1  | 0.091054  | 0.2001295 | 10.340 | 0.199 | 10.118 | 10.501 | 9.431  | 0.983 | 8.516  | 10.471 |
| 2487 | ENSG00000178397 | FAM220A  | -1.2 | 0.0042426 | 0.0186038 | 24.218 | 1.486 | 22.519 | 25.275 | 28.836 | 0.540 | 28.401 | 29.440 |
| 2488 | ENSG00000188732 | FAM221A  | 1.1  | 0.0870722 | 0.1933122 | 5.297  | 0.399 | 4.949  | 5.733  | 4.864  | 0.552 | 4.310  | 5.415  |
| 2489 | ENSG00000173065 | FAM222B  | -1.2 | 6.108E-06 | 8.777E-05 | 30.643 | 0.733 | 30.130 | 31.482 | 37.551 | 1.626 | 36.332 | 39.398 |
| 2490 | ENSG00000269911 | FAM226B  | -1.3 | 0.036025  | 0.0989525 | 4.093  | 0.708 | 3.320  | 4.710  | 5.491  | 0.563 | 4.872  | 5.973  |
| 2491 | ENSG00000166262 | FAM227B  | 1.2  | 0.027654  | 0.0809611 | 3.052  | 0.096 | 2.949  | 3.139  | 2.573  | 0.313 | 2.213  | 2.772  |
| 2492 | ENSG00000105058 | FAM32A   | 1.1  | 0.0088946 | 0.0331428 | 93.611 | 3.559 | 89.521 | 95.996 | 86.608 | 5.116 | 82.718 | 92.404 |

|      | A               | B             | C    | D         | E         | F       | G      | H       | I       | J       | K     | L       | M       |
|------|-----------------|---------------|------|-----------|-----------|---------|--------|---------|---------|---------|-------|---------|---------|
| 2493 | ENSG00000122376 | FAM35A        | 1.1  | 0.0007792 | 0.0047612 | 35.939  | 1.882  | 34.672  | 38.102  | 32.177  | 0.895 | 31.149  | 32.778  |
| 2494 | ENSG00000165874 | FAM35BP       | 1.2  | 0.0530732 | 0.1330057 | 4.371   | 0.310  | 4.121   | 4.718   | 3.787   | 0.126 | 3.647   | 3.892   |
| 2496 | ENSG00000196937 | FAM3C         | 1.1  | 0.0098221 | 0.0359298 | 45.277  | 0.650  | 44.727  | 45.994  | 41.674  | 1.013 | 40.699  | 42.721  |
| 2497 | ENSG00000183114 | FAM43B        | -1.8 | 0.0077816 | 0.0299797 | 0.768   | 0.294  | 0.517   | 1.091   | 1.420   | 0.308 | 1.168   | 1.763   |
| 2498 | ENSG00000119979 | FAM45A        | 1.2  | 0.0014825 | 0.0080133 | 19.544  | 2.036  | 17.508  | 21.580  | 17.293  | 0.181 | 17.160  | 17.499  |
| 2499 | ENSG00000221930 | FAM45BP       | 1.2  | 1.132E-05 | 0.0001482 | 61.252  | 2.837  | 58.301  | 63.958  | 50.269  | 2.882 | 47.976  | 53.504  |
| 2501 | ENSG00000112773 | FAM46A        | -1.2 | 0.0474532 | 0.1219907 | 4.168   | 0.109  | 4.052   | 4.269   | 4.937   | 0.528 | 4.567   | 5.542   |
| 2503 | ENSG00000189157 | FAM47E        | 1.2  | 0.0835299 | 0.1876899 | 1.072   | 0.049  | 1.018   | 1.113   | 0.899   | 0.103 | 0.839   | 1.018   |
| 2504 | ENSG00000189319 | FAM53B        | -1.1 | 0.0561379 | 0.1386479 | 6.025   | 0.238  | 5.752   | 6.183   | 6.946   | 0.510 | 6.358   | 7.274   |
| 2505 | ENSG00000167695 | FAM57A        | 1.2  | 0.001066  | 0.0061955 | 24.183  | 2.516  | 21.608  | 26.636  | 20.420  | 1.438 | 19.003  | 21.878  |
| 2506 | ENSG00000149926 | FAM57B        | -1.3 | 0.0002839 | 0.002119  | 6.654   | 0.513  | 6.062   | 6.965   | 8.918   | 0.414 | 8.446   | 9.217   |
| 2507 | ENSG00000262919 | FAM58A        | -1.1 | 0.0653171 | 0.1553303 | 15.596  | 0.386  | 15.157  | 15.884  | 17.918  | 0.177 | 17.729  | 18.081  |
| 2508 | ENSG00000139146 | FAM60A        | -1   | 0.0820953 | 0.1851797 | 317.752 | 16.268 | 298.968 | 327.340 | 339.658 | 7.085 | 333.253 | 347.267 |
| 2510 | ENSG00000165716 | FAM69B        | -1.1 | 0.0680166 | 0.1603296 | 28.305  | 0.923  | 27.701  | 29.367  | 31.816  | 3.686 | 28.085  | 35.456  |
| 2511 | ENSG00000142530 | FAM71E1       | 1.2  | 0.0213204 | 0.0662973 | 11.951  | 0.638  | 11.408  | 12.653  | 10.009  | 0.782 | 9.223   | 10.786  |
| 2512 | ENSG00000135248 | FAM71F1       | 1.7  | 7.076E-07 | 1.432E-05 | 8.361   | 0.704  | 7.624   | 9.025   | 5.125   | 0.463 | 4.591   | 5.421   |
| 2513 | ENSG00000196550 | FAM72A        | -1.3 | 1.888E-07 | 4.744E-06 | 24.291  | 1.085  | 23.211  | 25.380  | 32.617  | 2.746 | 30.536  | 35.729  |
| 2514 | ENSG00000188610 | FAM72B        | -1.3 | 2.087E-07 | 5.116E-06 | 33.103  | 0.717  | 32.575  | 33.920  | 43.686  | 2.842 | 40.933  | 46.609  |
| 2515 | ENSG00000263513 | FAM72C        | -1.2 | 0.0002671 | 0.0020156 | 22.932  | 0.548  | 22.406  | 23.500  | 29.047  | 3.215 | 25.799  | 32.228  |
| 2516 | ENSG00000215784 | FAM72D        | -1.3 | 1.133E-06 | 2.114E-05 | 28.458  | 0.696  | 27.973  | 29.255  | 38.547  | 4.334 | 35.007  | 43.381  |
| 2517 | ENSG00000077458 | FAM76B        | -1.1 | 0.1236737 | 0.248449  | 13.533  | 0.561  | 12.911  | 14.002  | 14.948  | 0.599 | 14.265  | 15.385  |
| 2518 | ENSG00000101447 | FAM83D        | -1.3 | 5.069E-08 | 1.509E-06 | 76.362  | 0.940  | 75.666  | 77.431  | 97.757  | 4.999 | 92.050  | 101.359 |
| 2519 | ENSG00000133477 | FAM83F        | -1.2 | 0.0001203 | 0.0010507 | 4.308   | 0.226  | 4.048   | 4.450   | 5.331   | 0.353 | 5.070   | 5.733   |
| 2520 | ENSG00000188522 | FAM83G        | 1.2  | 0.0007057 | 0.0044007 | 18.127  | 1.391  | 17.321  | 19.734  | 15.979  | 0.831 | 15.341  | 16.919  |
| 2521 | ENSG00000180921 | FAM83H        | 1.2  | 0.0003881 | 0.0027282 | 36.506  | 1.293  | 35.697  | 37.997  | 31.150  | 4.125 | 27.362  | 35.545  |
| 2522 | ENSG00000168672 | FAM84B        | -1.3 | 1.7E-05   | 0.0002067 | 48.499  | 3.665  | 46.312  | 52.730  | 64.428  | 7.630 | 56.757  | 72.017  |
| 2523 | ENSG00000186523 | FAM86B1       | 1.5  | 4.29E-07  | 9.485E-06 | 8.832   | 0.369  | 8.426   | 9.148   | 6.043   | 0.794 | 5.182   | 6.747   |
| 2524 | ENSG00000145002 | FAM86B2       | 1.3  | 0.0041612 | 0.0183327 | 11.043  | 1.174  | 10.018  | 12.324  | 8.362   | 1.427 | 7.108   | 9.915   |
| 2525 | ENSG00000173295 | FAM86B3P      | 1.4  | 0.0001738 | 0.0014246 | 5.213   | 0.412  | 4.815   | 5.637   | 3.824   | 0.450 | 3.362   | 4.261   |
| 2526 | ENSG00000160172 | FAM86C2P      | 1.3  | 0.0069087 | 0.0272215 | 5.619   | 0.564  | 4.994   | 6.090   | 4.548   | 0.111 | 4.431   | 4.653   |
| 2528 | ENSG00000244026 | FAM86DP       | 1.5  | 2.242E-07 | 5.439E-06 | 10.163  | 0.620  | 9.491   | 10.713  | 6.709   | 0.712 | 5.889   | 7.169   |
| 2530 | ENSG00000171084 | FAM86JP       | 1.3  | 0.0635436 | 0.1522189 | 3.824   | 0.950  | 3.050   | 4.884   | 3.060   | 0.675 | 2.625   | 3.838   |
| 2531 | ENSG00000137414 | FAM8A1        | 1.1  | 0.0436624 | 0.1144548 | 24.006  | 0.774  | 23.218  | 24.765  | 22.405  | 2.044 | 21.152  | 24.764  |
| 2532 | ENSG00000188343 | FAM92A        | 1.3  | 7.523E-05 | 0.0007168 | 9.249   | 0.336  | 8.926   | 9.597   | 7.479   | 0.279 | 7.207   | 7.764   |
| 2533 | ENSG00000157021 | FAM92A1P<br>1 | 1.2  | 0.0822262 | 0.1854255 | 17.612  | 0.429  | 17.158  | 18.011  | 15.184  | 1.279 | 13.795  | 16.314  |
| 2534 | ENSG00000273036 | FAM95C        | -1.6 | 0.0047446 | 0.0203206 | 1.273   | 0.099  | 1.198   | 1.385   | 2.138   | 0.560 | 1.540   | 2.650   |
| 2535 | ENSG00000119812 | FAM98A        | -1.3 | 3.353E-08 | 1.05E-06  | 36.109  | 1.744  | 34.346  | 37.834  | 46.654  | 1.101 | 45.413  | 47.512  |
| 2536 | ENSG00000171262 | FAM98B        | -1.1 | 0.0504825 | 0.1279501 | 44.866  | 1.092  | 43.710  | 45.882  | 48.868  | 2.422 | 46.411  | 51.252  |



|      | A               | B       | C    | D         | E         | F       | G     | H       | I       | J       | K      | L       | M       |
|------|-----------------|---------|------|-----------|-----------|---------|-------|---------|---------|---------|--------|---------|---------|
| 2537 | ENSG00000181544 | FANCB   | 1.2  | 0.0059801 | 0.0243069 | 16.293  | 0.725 | 15.854  | 17.130  | 14.062  | 1.336  | 12.897  | 15.521  |
| 2538 | ENSG00000158169 | FANCC   | 1.1  | 0.1135218 | 0.2333205 | 5.169   | 0.417 | 4.869   | 5.645   | 4.810   | 0.365  | 4.479   | 5.201   |
| 2539 | ENSG00000221829 | FANCG   | 1.1  | 0.0013021 | 0.0072465 | 32.164  | 1.380 | 30.905  | 33.639  | 28.572  | 1.822  | 26.506  | 29.947  |
| 2540 | ENSG00000197601 | FAR1    | 1.1  | 0.1190835 | 0.2414939 | 63.860  | 2.416 | 62.377  | 66.648  | 61.638  | 4.019  | 59.316  | 66.279  |
| 2541 | ENSG00000178162 | FAR2P2  | 1.1  | 0.0137287 | 0.0470409 | 16.958  | 1.120 | 15.762  | 17.982  | 15.488  | 0.504  | 15.118  | 16.063  |
| 2542 | ENSG00000240253 | FAR2P3  | 1.2  | 0.0514431 | 0.1297444 | 10.430  | 0.921 | 9.789   | 11.485  | 8.924   | 1.218  | 7.947   | 10.288  |
| 2543 | ENSG00000179115 | FARSA   | -1.1 | 0.0495149 | 0.1261024 | 50.178  | 2.185 | 47.847  | 52.179  | 55.555  | 2.092  | 54.007  | 57.935  |
| 2544 | ENSG00000116120 | FARSB   | 1.1  | 0.0272922 | 0.0801517 | 64.920  | 1.006 | 63.813  | 65.779  | 61.658  | 1.543  | 60.248  | 63.307  |
| 2545 | ENSG00000026103 | FAS     | 1.3  | 0.0016668 | 0.0088401 | 7.340   | 1.220 | 6.010   | 8.407   | 5.738   | 0.775  | 4.930   | 6.475   |
| 2546 | ENSG00000169710 | FASN    | 1.2  | 0.0189121 | 0.0603503 | 180.669 | 9.187 | 170.350 | 187.956 | 158.447 | 18.762 | 146.228 | 180.049 |
| 2547 | ENSG00000164896 | FASTK   | -1.1 | 0.0701254 | 0.1640777 | 21.040  | 2.013 | 18.716  | 22.209  | 23.473  | 1.017  | 22.500  | 24.530  |
| 2548 | ENSG00000138399 | FASTKD1 | -1.1 | 0.1244163 | 0.2495288 | 39.245  | 2.901 | 37.020  | 42.525  | 42.429  | 0.569  | 41.920  | 43.043  |
| 2549 | ENSG00000118246 | FASTKD2 | 1.1  | 0.0020901 | 0.0105114 | 29.754  | 1.551 | 28.013  | 30.987  | 27.159  | 1.016  | 26.053  | 28.050  |
| 2550 | ENSG00000124279 | FASTKD3 | -1.2 | 0.0317941 | 0.0903601 | 10.175  | 1.535 | 8.917   | 11.886  | 12.171  | 1.169  | 11.113  | 13.426  |
| 2551 | ENSG00000215251 | FASTKD5 | -1.1 | 0.02017   | 0.0634906 | 18.329  | 0.783 | 17.781  | 19.226  | 21.230  | 2.014  | 19.264  | 23.290  |
| 2552 | ENSG00000086570 | FAT2    | -1.5 | 0.1088875 | 0.2267998 | 0.112   | 0.021 | 0.091   | 0.133   | 0.168   | 0.016  | 0.151   | 0.182   |
| 2556 | ENSG00000196159 | FAT4    | 1.3  | 0.002029  | 0.0102773 | 1.246   | 0.196 | 1.033   | 1.419   | 0.945   | 0.095  | 0.847   | 1.035   |
| 2558 | ENSG00000149806 | FAU     | -1.1 | 0.0152326 | 0.0510663 | 225.802 | 3.238 | 223.050 | 229.369 | 247.401 | 7.899  | 238.713 | 254.149 |
| 2559 | ENSG00000146267 | FAXC    | 1.5  | 5.56E-11  | 3.851E-09 | 6.744   | 0.220 | 6.507   | 6.942   | 4.472   | 0.195  | 4.328   | 4.694   |
| 2560 | ENSG00000170271 | FAXDC2  | -1.3 | 0.0002223 | 0.0017379 | 6.477   | 0.895 | 5.540   | 7.323   | 8.486   | 0.485  | 7.926   | 8.781   |
| 2561 | ENSG00000188878 | FBF1    | -1.2 | 0.0477943 | 0.1226978 | 2.223   | 0.168 | 2.040   | 2.371   | 2.700   | 0.082  | 2.608   | 2.765   |
| 2563 | ENSG00000105202 | FBL     | -1.1 | 0.0017871 | 0.0093029 | 355.757 | 4.993 | 350.763 | 360.749 | 395.700 | 3.281  | 392.219 | 398.735 |
| 2564 | ENSG00000162458 | FBLIM1  | 1.2  | 1.246E-06 | 2.278E-05 | 44.286  | 0.991 | 43.154  | 44.999  | 37.238  | 0.583  | 36.579  | 37.688  |
| 2565 | ENSG00000188573 | FBLL1   | 1.7  | 6.769E-05 | 0.0006573 | 7.473   | 1.070 | 6.571   | 8.656   | 4.465   | 0.965  | 3.578   | 5.493   |
| 2566 | ENSG00000077942 | FBLN1   | -1.1 | 0.0447629 | 0.1166425 | 44.196  | 0.207 | 43.959  | 44.338  | 48.135  | 2.495  | 45.381  | 50.247  |
| 2567 | ENSG00000163520 | FBLN2   | -1.2 | 0.0002944 | 0.002181  | 17.183  | 2.210 | 15.689  | 19.722  | 21.731  | 2.073  | 19.907  | 23.986  |
| 2568 | ENSG00000138829 | FBN2    | -1.1 | 0.020637  | 0.0646556 | 13.538  | 1.021 | 12.360  | 14.154  | 15.096  | 0.497  | 14.628  | 15.619  |
| 2569 | ENSG00000142449 | FBN3    | -1.1 | 0.0099936 | 0.0364348 | 14.331  | 0.612 | 13.767  | 14.982  | 16.363  | 1.766  | 14.472  | 17.970  |
| 2570 | ENSG00000165140 | FBP1    | -1.4 | 0.0196767 | 0.062181  | 2.781   | 0.665 | 2.303   | 3.541   | 4.038   | 0.539  | 3.657   | 4.655   |
| 2571 | ENSG00000156860 | FBR5    | -1.2 | 0.0020435 | 0.0103226 | 3.968   | 0.423 | 3.498   | 4.319   | 5.017   | 0.253  | 4.863   | 5.309   |
| 2572 | ENSG00000107872 | FBXL15  | -1.4 | 0.0001323 | 0.0011355 | 6.549   | 0.402 | 6.148   | 6.951   | 9.277   | 0.798  | 8.385   | 9.922   |
| 2573 | ENSG00000099364 | FBXL19  | -1.1 | 0.0084305 | 0.0317916 | 31.188  | 1.713 | 29.248  | 32.489  | 35.781  | 4.406  | 32.378  | 40.757  |
| 2574 | ENSG00000112234 | FBXL4   | 1.1  | 0.0404119 | 0.1078394 | 9.614   | 0.625 | 8.897   | 10.042  | 8.885   | 0.463  | 8.384   | 9.295   |
| 2576 | ENSG00000118564 | FBXL5   | 1.1  | 3.088E-05 | 0.0003421 | 65.861  | 1.330 | 64.508  | 67.166  | 58.578  | 2.261  | 56.442  | 60.945  |
| 2577 | ENSG00000182325 | FBXL6   | -1.2 | 0.0165207 | 0.0544562 | 8.980   | 1.220 | 8.078   | 10.368  | 11.061  | 1.818  | 9.985   | 13.161  |
| 2578 | ENSG00000183580 | FBXL7   | -1.3 | 4.126E-06 | 6.287E-05 | 9.764   | 0.402 | 9.361   | 10.166  | 13.122  | 0.430  | 12.830  | 13.615  |
| 2579 | ENSG00000269190 | FBXO17  | 1.1  | 0.1178658 | 0.2398297 | 8.116   | 0.997 | 7.154   | 9.144   | 7.488   | 0.642  | 6.898   | 8.172   |
| 2580 | ENSG00000116661 | FBXO2   | -1.2 | 0.0007447 | 0.0045881 | 44.714  | 1.784 | 43.552  | 46.768  | 53.101  | 3.567  | 49.659  | 56.781  |
| 2581 | ENSG00000135108 | FBXO21  | -1.1 | 6.496E-05 | 0.0006358 | 30.844  | 0.665 | 30.084  | 31.318  | 36.211  | 1.583  | 35.221  | 38.036  |
| 2582 | ENSG00000147364 | FBXO25  | 1.2  | 0.0036033 | 0.0163209 | 5.477   | 0.045 | 5.434   | 5.523   | 4.797   | 0.302  | 4.574   | 5.141   |
| 2583 | ENSG00000103264 | FBXO31  | 1.1  | 0.0156779 | 0.0522483 | 7.374   | 0.540 | 6.807   | 7.883   | 6.552   | 0.176  | 6.440   | 6.755   |
| 2584 | ENSG00000165355 | FBXO33  | -1.1 | 0.0729437 | 0.1691385 | 12.272  | 1.430 | 10.904  | 13.757  | 13.902  | 0.928  | 12.864  | 14.654  |
| 2585 | ENSG00000178974 | FBXO34  | -1.2 | 0.003047  | 0.0142873 | 15.472  | 0.741 | 14.620  | 15.969  | 18.577  | 1.642  | 17.585  | 20.472  |

|      | A               | B         | C    | D         | E         | F       | G      | H       | I       | J       | K     | L       | M       |
|------|-----------------|-----------|------|-----------|-----------|---------|--------|---------|---------|---------|-------|---------|---------|
| 2586 | ENSG00000153832 | FBXO36    | -1.2 | 0.0123546 | 0.0431811 | 7.504   | 0.637  | 6.778   | 7.969   | 9.094   | 0.347 | 8.715   | 9.396   |
| 2587 | ENSG00000163013 | FBXO41    | -1.2 | 0.0002683 | 0.0020232 | 8.068   | 0.080  | 7.985   | 8.146   | 9.970   | 0.493 | 9.577   | 10.523  |
| 2588 | ENSG00000132879 | FBXO44    | -1.1 | 0.0202076 | 0.0635688 | 17.791  | 1.169  | 16.441  | 18.482  | 20.636  | 2.421 | 17.878  | 22.412  |
| 2589 | ENSG00000174013 | FBXO45    | -1.2 | 0.0005705 | 0.0037253 | 16.671  | 0.817  | 16.030  | 17.591  | 19.834  | 0.966 | 18.789  | 20.693  |
| 2590 | ENSG00000100225 | FBXO7     | 1.1  | 0.1137249 | 0.2335939 | 26.687  | 1.283  | 25.903  | 28.167  | 25.913  | 0.503 | 25.352  | 26.323  |
| 2591 | ENSG00000072803 | FBXW11    | -1.1 | 0.0332271 | 0.0933194 | 51.645  | 2.527  | 48.834  | 53.729  | 56.888  | 0.775 | 56.227  | 57.742  |
| 2592 | ENSG00000109670 | FBXW7     | -1.1 | 0.1109536 | 0.2299141 | 7.660   | 0.498  | 7.238   | 8.210   | 8.440   | 0.363 | 8.047   | 8.760   |
| 2593 | ENSG00000174989 | FBXW8     | 1.2  | 0.0005525 | 0.0036278 | 19.190  | 1.111  | 18.024  | 20.236  | 16.656  | 0.925 | 15.659  | 17.486  |
| 2595 | ENSG00000119616 | FCF1      | 1.1  | 0.0919196 | 0.2012979 | 45.609  | 1.681  | 44.166  | 47.454  | 43.781  | 0.573 | 43.128  | 44.198  |
| 2596 | ENSG00000275395 | FCGBP     | -1.5 | 0.0007873 | 0.0048073 | 0.579   | 0.067  | 0.506   | 0.638   | 0.899   | 0.113 | 0.773   | 0.989   |
| 2597 | ENSG00000197948 | FCHSD1    | -1.1 | 0.0368363 | 0.1005182 | 10.839  | 0.430  | 10.558  | 11.334  | 12.227  | 0.086 | 12.174  | 12.326  |
| 2598 | ENSG00000079459 | FDF1      | 1.8  | 1.79E-23  | 2.75E-20  | 366.181 | 11.311 | 353.189 | 373.837 | 210.155 | 5.980 | 204.454 | 216.379 |
| 2599 | ENSG00000160752 | FDPS      | 1.6  | 3.91E-20  | 2.54E-17  | 183.070 | 1.597  | 182.144 | 184.913 | 114.807 | 4.117 | 110.368 | 118.498 |
| 2600 | ENSG00000137714 | FDX1      | 1.1  | 0.0316691 | 0.0900959 | 17.059  | 1.299  | 15.668  | 18.240  | 15.415  | 0.158 | 15.318  | 15.598  |
| 2603 | ENSG00000161513 | FDXR      | -1.2 | 0.0032383 | 0.0149808 | 27.093  | 2.493  | 24.794  | 29.742  | 33.117  | 3.288 | 30.119  | 36.634  |
| 2605 | ENSG00000066926 | FECH      | 1.3  | 2.905E-06 | 4.653E-05 | 21.910  | 0.452  | 21.535  | 22.412  | 17.848  | 0.962 | 16.978  | 18.881  |
| 2606 | ENSG00000141965 | FEM1A     | -1.1 | 0.008285  | 0.0314165 | 9.188   | 0.571  | 8.542   | 9.626   | 10.545  | 0.342 | 10.191  | 10.874  |
| 2607 | ENSG00000169018 | FEM1B     | -1.1 | 3.263E-05 | 0.0003574 | 56.003  | 0.520  | 55.551  | 56.571  | 65.309  | 0.808 | 64.488  | 66.102  |
| 2608 | ENSG00000145780 | FEM1C     | -1.1 | 0.0506685 | 0.1283062 | 17.498  | 0.681  | 16.740  | 18.060  | 19.417  | 1.056 | 18.451  | 20.545  |
| 2610 | ENSG00000168496 | FEN1      | -1.1 | 0.0145952 | 0.0493995 | 73.774  | 3.229  | 71.426  | 77.457  | 81.737  | 2.235 | 79.234  | 83.533  |
| 2612 | ENSG00000088340 | FER1L4    | -1.2 | 0.0974675 | 0.2093825 | 1.416   | 0.282  | 1.108   | 1.660   | 1.724   | 0.286 | 1.528   | 2.053   |
| 2613 | ENSG00000073712 | FERMT2    | 1.4  | 7.50E-14  | 1.08E-11  | 71.729  | 2.193  | 69.223  | 73.293  | 53.951  | 0.978 | 53.341  | 55.080  |
| 2614 | ENSG00000149557 | FEZ1      | -1.3 | 2.082E-06 | 3.518E-05 | 9.880   | 0.256  | 9.605   | 10.113  | 13.322  | 1.034 | 12.143  | 14.073  |
| 2615 | ENSG00000128610 | FEZF1     | -2   | 0.0019453 | 0.009952  | 0.680   | 0.194  | 0.456   | 0.792   | 1.419   | 0.278 | 1.214   | 1.736   |
| 2616 | ENSG00000230316 | FEZF1-AS1 | -2   | 0.0029312 | 0.0138054 | 0.597   | 0.183  | 0.401   | 0.764   | 1.215   | 0.379 | 0.984   | 1.652   |
| 2617 | ENSG00000102302 | FGD1      | -1.1 | 0.01839   | 0.059075  | 21.542  | 1.311  | 20.031  | 22.374  | 24.864  | 2.147 | 22.564  | 26.816  |
| 2618 | ENSG00000127084 | FGD3      | -1.4 | 0.023617  | 0.0717762 | 0.796   | 0.114  | 0.677   | 0.903   | 1.128   | 0.018 | 1.107   | 1.142   |
| 2619 | ENSG00000154783 | FGD5      | 1.2  | 0.0004276 | 0.002947  | 12.203  | 0.679  | 11.420  | 12.629  | 10.466  | 0.646 | 9.754   | 11.015  |
| 2620 | ENSG00000180263 | FGD6      | 1.1  | 0.0042497 | 0.0186206 | 21.762  | 0.507  | 21.212  | 22.211  | 20.144  | 0.764 | 19.606  | 21.019  |
| 2621 | ENSG00000113578 | FGF1      | 1.9  | 0.0301974 | 0.0867259 | 0.393   | 0.096  | 0.282   | 0.448   | 0.212   | 0.057 | 0.147   | 0.253   |
| 2622 | ENSG00000161958 | FGF11     | -1.3 | 0.0293166 | 0.0847051 | 1.864   | 0.423  | 1.459   | 2.302   | 2.413   | 0.347 | 2.108   | 2.791   |
| 2623 | ENSG00000114279 | FGF12     | 1.1  | 0.1046432 | 0.22032   | 5.060   | 0.816  | 4.560   | 6.002   | 4.614   | 0.305 | 4.266   | 4.835   |
| 2625 | ENSG00000129682 | FGF13     | 1.2  | 2.458E-05 | 0.0002833 | 10.017  | 0.793  | 9.351   | 10.894  | 8.662   | 0.087 | 8.570   | 8.742   |
| 2626 | ENSG00000226031 | FGF13-AS1 | 1.5  | 0.0001928 | 0.0015503 | 13.194  | 0.912  | 12.387  | 14.184  | 9.155   | 0.876 | 8.196   | 9.911   |
| 2627 | ENSG00000272143 | FGF14-AS2 | 1.4  | 0.0036982 | 0.0166472 | 10.942  | 0.795  | 10.042  | 11.548  | 7.927   | 1.407 | 6.371   | 9.110   |
| 2628 | ENSG00000070388 | FGF22     | -1.4 | 0.070818  | 0.165229  | 1.067   | 0.142  | 0.904   | 1.169   | 1.511   | 0.118 | 1.398   | 1.633   |
| 2629 | ENSG00000174721 | FGFBP3    | 2.4  | 7.62E-29  | 5.94E-25  | 464.956 | 18.019 | 449.531 | 484.762 | 196.310 | 5.011 | 190.570 | 199.805 |
| 2630 | ENSG00000077782 | FGFR1     | -1.1 | 8.326E-05 | 0.0007775 | 122.679 | 6.395  | 115.530 | 127.856 | 141.317 | 7.584 | 133.780 | 148.947 |
| 2631 | ENSG00000111790 | FGFR1OP2  | -1.1 | 0.0036849 | 0.0166148 | 17.298  | 0.811  | 16.627  | 18.199  | 20.264  | 0.267 | 20.090  | 20.571  |

|      | A               | B          | C    | D         | E         | F       | G      | H       | I       | J       | K      | L       | M       |
|------|-----------------|------------|------|-----------|-----------|---------|--------|---------|---------|---------|--------|---------|---------|
| 2632 | ENSG00000066468 | FGFR2      | -1.2 | 5.969E-09 | 2.381E-07 | 43.487  | 1.071  | 42.328  | 44.441  | 54.723  | 0.848  | 53.867  | 55.563  |
| 2633 | ENSG00000068078 | FGFR3      | 1.1  | 0.0059926 | 0.0243403 | 43.733  | 2.843  | 41.538  | 46.944  | 39.184  | 2.840  | 36.457  | 42.125  |
| 2635 | ENSG00000127418 | FGFRL1     | 1.4  | 5.453E-06 | 8.006E-05 | 11.925  | 1.121  | 10.650  | 12.760  | 8.829   | 0.837  | 8.173   | 9.773   |
| 2636 | ENSG00000137460 | FHDC1      | 1.6  | 3.96E-13  | 4.62E-11  | 20.677  | 0.302  | 20.392  | 20.993  | 13.552  | 1.380  | 12.484  | 15.111  |
| 2637 | ENSG00000022267 | FHL1       | 1.1  | 0.0887365 | 0.196055  | 22.934  | 1.698  | 21.173  | 24.562  | 21.917  | 0.423  | 21.428  | 22.168  |
| 2638 | ENSG00000115641 | FHL2       | 1.4  | 7.604E-07 | 1.524E-05 | 13.147  | 1.334  | 11.609  | 14.002  | 9.835   | 0.859  | 8.969   | 10.688  |
| 2639 | ENSG00000183386 | FHL3       | 1.2  | 0.0057008 | 0.0234413 | 30.429  | 3.041  | 27.260  | 33.323  | 26.104  | 3.278  | 22.318  | 28.018  |
| 2640 | ENSG00000135723 | FHOD1      | -1.2 | 0.0004965 | 0.0033374 | 12.558  | 0.946  | 11.496  | 13.309  | 15.334  | 1.045  | 14.131  | 16.019  |
| 2641 | ENSG00000134775 | FHOD3      | -1.1 | 0.0360285 | 0.0989525 | 4.698   | 0.328  | 4.321   | 4.915   | 5.452   | 0.329  | 5.259   | 5.832   |
| 2643 | ENSG00000172500 | FIBP       | -1.1 | 0.0042264 | 0.0185425 | 25.775  | 1.819  | 24.322  | 27.815  | 30.144  | 0.900  | 29.106  | 30.710  |
| 2644 | ENSG00000198855 | FICD       | 1.2  | 0.1127303 | 0.2322866 | 2.718   | 0.554  | 2.388   | 3.359   | 2.336   | 0.223  | 2.151   | 2.584   |
| 2645 | ENSG00000112367 | FIG4       | 1.2  | 2.923E-05 | 0.0003261 | 44.028  | 0.943  | 42.940  | 44.598  | 38.181  | 0.804  | 37.447  | 39.041  |
| 2646 | ENSG00000132436 | FIGNL1     | 1.3  | 4.21E-05  | 0.0004444 | 11.584  | 0.492  | 11.057  | 12.033  | 9.341   | 0.338  | 8.984   | 9.656   |
| 2647 | ENSG00000261308 | FIGNL2     | -1.1 | 0.0851448 | 0.190031  | 10.200  | 1.062  | 9.174   | 11.294  | 11.607  | 0.989  | 10.470  | 12.265  |
| 2648 | ENSG00000118407 | FILIP1     | -1.4 | 4.035E-08 | 1.243E-06 | 8.139   | 0.289  | 7.808   | 8.344   | 11.462  | 0.762  | 10.585  | 11.959  |
| 2649 | ENSG00000145216 | FIP1L1     | 1.1  | 0.0367005 | 0.1003582 | 14.369  | 0.737  | 13.727  | 15.173  | 13.249  | 0.834  | 12.293  | 13.833  |
| 2650 | ENSG00000213468 | FIRRE      | -1.3 | 1.467E-07 | 3.807E-06 | 17.419  | 0.866  | 16.580  | 18.310  | 23.520  | 0.442  | 23.155  | 24.011  |
| 2651 | ENSG00000179431 | FJX1       | 1.6  | 3.428E-05 | 0.0003733 | 6.430   | 0.484  | 5.966   | 6.932   | 4.223   | 0.546  | 3.867   | 4.852   |
| 2652 | ENSG00000134285 | FKBP11     | -1.3 | 3.726E-06 | 5.765E-05 | 7.406   | 0.241  | 7.138   | 7.604   | 10.215  | 0.374  | 9.806   | 10.538  |
| 2653 | ENSG00000119321 | FKBP15     | 1.1  | 0.1049754 | 0.2208269 | 7.290   | 0.125  | 7.160   | 7.409   | 6.932   | 0.130  | 6.782   | 7.014   |
| 2655 | ENSG00000088832 | FKBP1A     | 1.1  | 0.0093752 | 0.0345673 | 165.391 | 1.700  | 163.582 | 166.955 | 156.986 | 3.003  | 153.557 | 159.148 |
| 2656 | ENSG00000004478 | FKBP4      | -1.2 | 3.638E-06 | 5.65E-05  | 117.775 | 7.048  | 109.829 | 123.272 | 140.291 | 6.676  | 135.160 | 147.839 |
| 2657 | ENSG00000096060 | FKBP5      | 1.2  | 2.361E-06 | 3.907E-05 | 27.712  | 0.549  | 27.079  | 28.064  | 24.034  | 0.444  | 23.604  | 24.490  |
| 2658 | ENSG00000105701 | FKBP8      | -1.1 | 0.0278303 | 0.0814209 | 187.562 | 7.732  | 179.239 | 194.523 | 205.034 | 10.235 | 194.836 | 215.305 |
| 2659 | ENSG00000122642 | FKBP9      | 1.1  | 0.0434711 | 0.1140241 | 6.248   | 0.681  | 5.555   | 6.916   | 5.555   | 0.260  | 5.375   | 5.854   |
| 2661 | ENSG00000106692 | FKTN       | 1.2  | 2.07E-05  | 0.0002447 | 15.378  | 0.734  | 14.542  | 15.919  | 13.015  | 0.233  | 12.832  | 13.277  |
| 2662 | ENSG00000160688 | FLAD1      | -1.1 | 0.0030087 | 0.014127  | 30.822  | 1.365  | 29.720  | 32.349  | 35.527  | 2.624  | 32.970  | 38.214  |
| 2664 | ENSG00000196924 | FLNA       | 1.1  | 0.0001687 | 0.0013888 | 395.734 | 22.388 | 370.528 | 413.308 | 356.333 | 23.532 | 342.256 | 383.499 |
| 2665 | ENSG00000136068 | FLNB       | -1.1 | 0.0046145 | 0.0198792 | 47.908  | 1.473  | 46.245  | 49.046  | 53.285  | 3.210  | 50.262  | 56.654  |
| 2668 | ENSG00000128591 | FLNC       | 2.6  | 2.165E-06 | 3.626E-05 | 19.807  | 2.307  | 17.184  | 21.516  | 7.741   | 0.968  | 6.753   | 8.688   |
| 2670 | ENSG00000185070 | FLRT2      | 1.4  | 0.0007736 | 0.0047353 | 0.677   | 0.110  | 0.585   | 0.800   | 0.508   | 0.077  | 0.454   | 0.596   |
| 2672 | ENSG00000125848 | FLRT3      | 1.9  | 0.0395395 | 0.1059797 | 0.380   | 0.215  | 0.230   | 0.626   | 0.202   | 0.093  | 0.096   | 0.271   |
| 2673 | ENSG00000102755 | FLT1       | 1    | 0.1168197 | 0.2382744 | 35.444  | 1.048  | 34.250  | 36.209  | 34.613  | 1.539  | 32.849  | 35.683  |
| 2674 | ENSG00000162769 | FLVCR1     | 1.2  | 2.694E-05 | 0.000305  | 25.719  | 1.147  | 24.769  | 26.993  | 22.267  | 0.935  | 21.190  | 22.875  |
| 2675 | ENSG00000198468 | FLVCR1-AS1 | -1.2 | 0.0635923 | 0.1522776 | 3.959   | 0.592  | 3.295   | 4.430   | 4.883   | 0.306  | 4.568   | 5.178   |
| 2676 | ENSG00000162076 | FLYWCH2    | 1.1  | 0.1186133 | 0.2408016 | 20.459  | 1.159  | 19.590  | 21.775  | 18.578  | 3.028  | 16.728  | 22.072  |
| 2677 | ENSG00000155816 | FMN2       | 1.3  | 0.0849931 | 0.1898678 | 0.673   | 0.068  | 0.595   | 0.716   | 0.543   | 0.040  | 0.497   | 0.568   |
| 2678 | ENSG00000184922 | FMNL1      | 1.1  | 0.0824204 | 0.1857396 | 3.474   | 0.272  | 3.198   | 3.742   | 3.107   | 0.464  | 2.644   | 3.571   |
| 2679 | ENSG00000157827 | FMNL2      | -1.1 | 0.0022665 | 0.0112021 | 48.512  | 2.001  | 46.462  | 50.461  | 55.363  | 3.655  | 51.314  | 58.419  |
| 2680 | ENSG00000161791 | FMNL3      | 1.3  | 1.444E-06 | 2.576E-05 | 6.379   | 0.477  | 5.862   | 6.803   | 5.059   | 0.114  | 4.960   | 5.185   |
| 2681 | ENSG00000115414 | FN1        | 1.2  | 1.024E-05 | 0.0001361 | 27.377  | 1.188  | 26.678  | 28.749  | 23.822  | 1.851  | 22.583  | 25.951  |
| 2682 | ENSG00000167363 | FN3K       | -1.2 | 0.0463757 | 0.1199117 | 6.401   | 0.179  | 6.195   | 6.520   | 7.555   | 0.699  | 6.767   | 8.102   |

|      | A               | B       | C    | D         | E         | F      | G     | H      | I      | J      | K     | L      | M      |
|------|-----------------|---------|------|-----------|-----------|--------|-------|--------|--------|--------|-------|--------|--------|
| 2683 | ENSG00000109920 | FNBP4   | -1.1 | 0.0073339 | 0.0285275 | 41.185 | 1.505 | 39.463 | 42.245 | 45.816 | 1.763 | 44.774 | 47.851 |
| 2684 | ENSG00000102531 | FNDC3A  | 1.1  | 0.0002327 | 0.0018039 | 25.993 | 0.562 | 25.373 | 26.468 | 23.246 | 0.471 | 22.837 | 23.760 |
| 2685 | ENSG00000115226 | FNDC4   | 1.2  | 0.0150168 | 0.050483  | 19.607 | 1.440 | 17.953 | 20.573 | 16.904 | 0.431 | 16.588 | 17.395 |
| 2686 | ENSG00000217128 | FNIP1   | 1.2  | 0.0001111 | 0.0009829 | 14.212 | 0.218 | 13.961 | 14.361 | 12.039 | 0.950 | 11.067 | 12.965 |
| 2687 | ENSG00000052795 | FNIP2   | 1.3  | 9.064E-06 | 0.0001225 | 4.693  | 0.383 | 4.293  | 5.057  | 3.582  | 0.256 | 3.332  | 3.844  |
| 2688 | ENSG00000257365 | FNTB    | 1.3  | 0.0088338 | 0.032967  | 4.402  | 0.227 | 4.189  | 4.640  | 3.489  | 0.435 | 3.128  | 3.973  |
| 2689 | ENSG00000188352 | FOCAD   | 1.1  | 0.090857  | 0.1998004 | 23.498 | 0.094 | 23.426 | 23.605 | 22.780 | 0.671 | 22.150 | 23.485 |
| 2690 | ENSG00000133393 | FOPNL   | -1.1 | 0.078859  | 0.1795559 | 72.060 | 2.340 | 69.477 | 74.038 | 78.326 | 3.037 | 74.962 | 80.865 |
| 2693 | ENSG00000170345 | FOS     | 1.2  | 0.0342083 | 0.0953913 | 12.217 | 1.462 | 10.533 | 13.159 | 10.756 | 1.668 | 9.688  | 12.679 |
| 2694 | ENSG00000175592 | FOSL1   | 1.2  | 0.0050349 | 0.0212622 | 23.994 | 2.350 | 21.531 | 26.211 | 20.051 | 2.724 | 17.283 | 22.729 |
| 2695 | ENSG00000075426 | FOSL2   | 2    | 7.89E-11  | 5.215E-09 | 4.822  | 0.795 | 4.105  | 5.677  | 2.432  | 0.248 | 2.148  | 2.612  |
| 2697 | ENSG00000170608 | FOXA3   | -1.1 | 0.07664   | 0.1753771 | 15.591 | 1.523 | 14.019 | 17.060 | 17.796 | 0.617 | 17.130 | 18.350 |
| 2698 | ENSG00000171956 | FOXB1   | -1.4 | 0.0791658 | 0.1800608 | 0.738  | 0.322 | 0.368  | 0.948  | 1.076  | 0.169 | 0.909  | 1.246  |
| 2699 | ENSG00000160973 | FOXH1   | -1.4 | 4.605E-08 | 1.393E-06 | 39.288 | 3.112 | 35.746 | 41.583 | 54.249 | 4.441 | 49.539 | 58.361 |
| 2700 | ENSG00000214336 | FOXI3   | -1.1 | 0.0067877 | 0.0268036 | 25.866 | 0.908 | 25.011 | 26.819 | 30.215 | 1.017 | 29.437 | 31.366 |
| 2701 | ENSG00000129654 | FOXJ1   | -1.4 | 0.004298  | 0.0187982 | 4.413  | 0.496 | 3.916  | 4.908  | 6.192  | 1.240 | 4.763  | 6.988  |
| 2703 | ENSG00000198815 | FOXJ3   | -1.1 | 0.0162331 | 0.0537282 | 28.905 | 1.472 | 27.342 | 30.264 | 32.039 | 0.446 | 31.632 | 32.515 |
| 2704 | ENSG00000206262 | FOXL2NB | 1.2  | 0.0514712 | 0.1297946 | 5.111  | 0.653 | 4.404  | 5.690  | 4.404  | 0.647 | 3.911  | 5.137  |
| 2705 | ENSG00000170802 | FOXN2   | 1.1  | 0.0344674 | 0.0958165 | 17.126 | 0.478 | 16.766 | 17.668 | 15.955 | 0.398 | 15.590 | 16.379 |
| 2706 | ENSG00000053254 | FOXN3   | -1.1 | 6.024E-05 | 0.0005976 | 47.772 | 2.783 | 46.160 | 50.986 | 55.385 | 1.012 | 54.260 | 56.221 |
| 2707 | ENSG00000150907 | FOXO1   | -1.3 | 1.065E-07 | 2.877E-06 | 22.293 | 0.437 | 21.803 | 22.640 | 28.740 | 1.903 | 26.672 | 30.416 |
| 2708 | ENSG00000118689 | FOXO3   | 1.2  | 0.0006767 | 0.004264  | 13.521 | 0.936 | 12.468 | 14.260 | 11.779 | 0.394 | 11.364 | 12.147 |
| 2709 | ENSG00000184481 | FOXO4   | -1.2 | 0.0007332 | 0.0045391 | 15.711 | 0.710 | 15.128 | 16.501 | 19.550 | 1.902 | 18.149 | 21.716 |
| 2710 | ENSG00000137166 | FOXP4   | -1.3 | 0.0006611 | 0.0041895 | 4.129  | 0.613 | 3.494  | 4.717  | 5.586  | 0.541 | 5.085  | 6.160  |
| 2711 | ENSG00000100350 | FOXRED2 | 1.3  | 0.000572  | 0.003734  | 13.143 | 2.232 | 10.642 | 14.933 | 10.437 | 0.928 | 9.456  | 11.302 |
| 2713 | ENSG00000254685 | FPGT    | 1.2  | 0.0250048 | 0.0749968 | 5.033  | 0.597 | 4.345  | 5.408  | 4.202  | 0.686 | 3.434  | 4.752  |
| 2714 | ENSG00000138759 | FRAS1   | 1.1  | 0.0051019 | 0.0214718 | 64.569 | 1.735 | 62.819 | 66.288 | 61.488 | 1.721 | 60.334 | 63.467 |
| 2716 | ENSG00000181274 | FRAT2   | -1.5 | 1.58E-12  | 1.67E-10  | 42.651 | 2.044 | 40.326 | 44.167 | 66.293 | 4.135 | 61.687 | 69.683 |
| 2717 | ENSG00000150893 | FREM2   | -1.2 | 2.991E-06 | 4.773E-05 | 19.939 | 0.911 | 18.897 | 20.580 | 23.978 | 0.878 | 23.300 | 24.969 |
| 2718 | ENSG00000109536 | FRG1    | 1.1  | 0.0049317 | 0.020931  | 54.254 | 0.672 | 53.582 | 54.927 | 48.239 | 4.530 | 44.907 | 53.397 |
| 2719 | ENSG00000282826 | FRG1CP  | 1.5  | 1.03E-05  | 0.0001366 | 28.413 | 1.898 | 27.142 | 30.595 | 18.932 | 1.550 | 17.322 | 20.413 |
| 2720 | ENSG00000172159 | FRMD3   | -1.5 | 0.0170823 | 0.0557854 | 0.502  | 0.099 | 0.433  | 0.615  | 0.778  | 0.095 | 0.675  | 0.862  |
| 2722 | ENSG00000151474 | FRMD4A  | 1.2  | 2.266E-05 | 0.000265  | 8.402  | 0.613 | 7.804  | 9.028  | 6.967  | 0.366 | 6.548  | 7.229  |
| 2723 | ENSG00000139926 | FRMD6   | 1.1  | 0.010666  | 0.0383899 | 7.535  | 0.171 | 7.374  | 7.715  | 6.769  | 0.237 | 6.505  | 6.960  |
| 2725 | ENSG00000126391 | FRMD8   | 1.2  | 0.0108064 | 0.0388042 | 13.974 | 0.658 | 13.302 | 14.617 | 12.377 | 1.298 | 11.259 | 13.801 |
| 2726 | ENSG00000147234 | FRMPD3  | -1.6 | 0.0007648 | 0.0046899 | 0.561  | 0.078 | 0.516  | 0.651  | 0.942  | 0.247 | 0.661  | 1.127  |
| 2727 | ENSG00000166225 | FRS2    | -1.1 | 0.0183178 | 0.0589103 | 14.243 | 0.349 | 13.843 | 14.483 | 16.152 | 0.752 | 15.654 | 17.018 |
| 2728 | ENSG00000073910 | FRY     | 1.2  | 0.0206966 | 0.0647866 | 2.248  | 0.171 | 2.072  | 2.414  | 1.945  | 0.169 | 1.773  | 2.111  |
| 2729 | ENSG00000075539 | FRYL    | -1.1 | 0.0171558 | 0.0559499 | 10.127 | 0.096 | 10.027 | 10.219 | 11.296 | 0.345 | 11.089 | 11.695 |
| 2730 | ENSG00000162998 | FRZB    | 1.6  | 0.0071013 | 0.0278213 | 1.735  | 0.477 | 1.261  | 2.215  | 1.086  | 0.275 | 0.792  | 1.335  |
| 2731 | ENSG00000265817 | FSBP    | -1.5 | 0.002478  | 0.0120778 | 1.469  | 0.065 | 1.396  | 1.520  | 2.312  | 0.414 | 1.870  | 2.691  |
| 2732 | ENSG00000105255 | FSD1    | -1.2 | 4.945E-05 | 0.0005087 | 28.678 | 0.286 | 28.447 | 28.997 | 35.342 | 1.439 | 33.683 | 36.242 |
| 2735 | ENSG00000150667 | FSIP1   | 1.6  | 0.0466724 | 0.1204962 | 0.853  | 0.050 | 0.801  | 0.901  | 0.557  | 0.069 | 0.509  | 0.636  |

|      | A               | B       | C    | D         | E         | F        | G       | H        | I        | J        | K      | L        | M        |
|------|-----------------|---------|------|-----------|-----------|----------|---------|----------|----------|----------|--------|----------|----------|
| 2737 | ENSG00000134363 | FST     | -1.1 | 0.0293235 | 0.0847051 | 17.495   | 0.303   | 17.167   | 17.764   | 20.109   | 1.514  | 18.437   | 21.387   |
| 2738 | ENSG00000163430 | FSTL1   | 1.1  | 4.485E-05 | 0.0004683 | 208.240  | 1.989   | 206.867  | 210.521  | 191.346  | 0.728  | 190.647  | 192.100  |
| 2739 | ENSG00000070404 | FSTL3   | -1.2 | 0.1042402 | 0.2197319 | 4.169    | 0.480   | 3.851    | 4.721    | 5.028    | 0.270  | 4.742    | 5.278    |
| 2740 | ENSG00000053108 | FSTL4   | 1.2  | 0.0721924 | 0.1677414 | 2.508    | 0.305   | 2.171    | 2.764    | 2.166    | 0.278  | 1.845    | 2.330    |
| 2741 | ENSG00000167996 | FTH1    | 1.2  | 1.456E-09 | 6.842E-08 | 839.061  | 31.290  | 808.391  | 870.936  | 689.774  | 36.807 | 653.157  | 726.768  |
| 2742 | ENSG00000223361 | FTH1P10 | 1.2  | 0.0001665 | 0.0013754 | 143.199  | 9.649   | 134.717  | 153.697  | 120.973  | 8.587  | 112.445  | 129.618  |
| 2743 | ENSG00000237264 | FTH1P11 | 1.2  | 1.173E-05 | 0.0001527 | 224.359  | 10.195  | 214.576  | 234.922  | 188.249  | 3.667  | 185.449  | 192.399  |
| 2744 | ENSG00000213362 | FTH1P12 | 1.3  | 0.0948533 | 0.2057925 | 12.765   | 1.518   | 11.053   | 13.947   | 10.298   | 2.211  | 7.799    | 12.001   |
| 2746 | ENSG00000227376 | FTH1P16 | 1.2  | 0.0080971 | 0.0308716 | 77.467   | 9.040   | 68.473   | 86.552   | 66.752   | 3.272  | 63.490   | 70.034   |
| 2748 | ENSG00000234975 | FTH1P2  | 1.2  | 1.473E-05 | 0.0001836 | 330.126  | 4.991   | 324.480  | 333.949  | 277.921  | 8.821  | 269.181  | 286.822  |
| 2749 | ENSG00000226564 | FTH1P20 | 1.2  | 9.402E-05 | 0.0008596 | 185.386  | 7.995   | 178.270  | 194.038  | 155.445  | 8.975  | 146.324  | 164.268  |
| 2750 | ENSG00000242960 | FTH1P23 | 1.2  | 0.000408  | 0.0028337 | 85.223   | 4.757   | 81.183   | 90.466   | 70.383   | 3.710  | 67.682   | 74.614   |
| 2751 | ENSG00000213453 | FTH1P3  | 1.4  | 0.0713048 | 0.1660898 | 7.246    | 1.327   | 5.720    | 8.123    | 5.414    | 0.810  | 4.673    | 6.278    |
| 2752 | ENSG00000230204 | FTH1P5  | 1.2  | 0.0112308 | 0.039997  | 47.035   | 2.236   | 45.680   | 49.616   | 40.124   | 0.565  | 39.529   | 40.652   |
| 2753 | ENSG00000232187 | FTH1P7  | 1.2  | 1.391E-05 | 0.0001762 | 242.590  | 9.751   | 234.121  | 253.251  | 202.213  | 16.746 | 191.723  | 221.526  |
| 2754 | ENSG00000219507 | FTH1P8  | 1.1  | 0.0238459 | 0.072353  | 147.991  | 7.622   | 139.191  | 152.492  | 133.153  | 13.612 | 122.594  | 148.515  |
| 2757 | ENSG00000087086 | FTL     | 1.5  | 6.10E-17  | 1.81E-14  | 3957.900 | 150.614 | 3783.988 | 4045.679 | 2741.173 | 11.482 | 2731.680 | 2753.935 |
| 2758 | ENSG00000232368 | FTLP2   | 1.6  | 0.0003962 | 0.0027779 | 19.871   | 0.741   | 19.119   | 20.600   | 12.480   | 2.234  | 10.418   | 14.853   |
| 2759 | ENSG00000226608 | FTLP3   | 1.4  | 1.02E-11  | 8.641E-10 | 472.384  | 10.276  | 460.971  | 480.901  | 344.418  | 14.960 | 328.688  | 358.465  |
| 2760 | ENSG00000140718 | FTO     | 1.1  | 0.0013149 | 0.0072868 | 8.388    | 0.249   | 8.120    | 8.612    | 7.548    | 0.319  | 7.344    | 7.915    |
| 2761 | ENSG00000108592 | FTSJ3   | -1.2 | 7.058E-06 | 9.897E-05 | 40.274   | 1.160   | 39.404   | 41.591   | 48.396   | 0.545  | 47.772   | 48.777   |
| 2762 | ENSG00000230590 | FTX     | 1.1  | 0.0255456 | 0.0761997 | 2.272    | 0.166   | 2.113    | 2.444    | 2.040    | 0.061  | 1.972    | 2.090    |
| 2763 | ENSG00000162613 | FUBP1   | -1.2 | 3.109E-07 | 7.222E-06 | 180.998  | 2.955   | 177.872  | 183.747  | 218.576  | 7.561  | 213.297  | 227.238  |
| 2764 | ENSG00000107164 | FUBP3   | -1.1 | 0.0305026 | 0.0873502 | 51.913   | 0.595   | 51.402   | 52.565   | 56.547   | 1.578  | 55.550   | 58.366   |
| 2766 | ENSG00000179163 | FUCA1   | 1.2  | 0.0035852 | 0.0162554 | 17.969   | 0.264   | 17.743   | 18.260   | 15.092   | 0.436  | 14.593   | 15.401   |
| 2767 | ENSG00000001036 | FUCA2   | 1.1  | 0.0035422 | 0.0161003 | 78.479   | 3.472   | 74.536   | 81.080   | 72.028   | 2.084  | 69.828   | 73.973   |
| 2769 | ENSG00000069509 | FUNDC1  | -1.1 | 0.0220073 | 0.0678844 | 51.910   | 3.831   | 49.000   | 56.251   | 59.247   | 2.006  | 57.909   | 61.554   |
| 2772 | ENSG00000140564 | FURIN   | 1.2  | 0.0012256 | 0.0069118 | 33.679   | 1.714   | 31.946   | 35.373   | 29.720   | 2.267  | 27.526   | 32.054   |
| 2773 | ENSG00000089280 | FUS     | -1.1 | 0.0016653 | 0.0088347 | 171.221  | 14.075  | 155.010  | 180.338  | 192.089  | 0.596  | 191.470  | 192.658  |
| 2774 | ENSG00000174951 | FUT1    | 1.3  | 7.533E-05 | 0.0007174 | 7.424    | 0.099   | 7.309    | 7.484    | 5.616    | 0.668  | 5.111    | 6.374    |
| 2775 | ENSG00000176920 | FUT2    | -1.2 | 0.0847554 | 0.189537  | 2.352    | 0.120   | 2.229    | 2.468    | 2.908    | 0.215  | 2.732    | 3.147    |
| 2776 | ENSG00000172461 | FUT9    | -1.1 | 0.0172479 | 0.0561421 | 6.136    | 0.105   | 6.070    | 6.257    | 7.013    | 0.648  | 6.396    | 7.688    |
| 2777 | ENSG00000010361 | FUZ     | 1.1  | 0.0896143 | 0.1975299 | 16.384   | 1.438   | 15.365   | 18.029   | 15.090   | 0.133  | 14.951   | 15.216   |
| 2778 | ENSG00000114416 | FXR1    | -1.1 | 1.346E-06 | 2.442E-05 | 93.387   | 1.496   | 91.954   | 94.939   | 109.461  | 2.528  | 107.929  | 112.379  |
| 2779 | ENSG00000221946 | FXD7    | -1.2 | 0.1150452 | 0.2356497 | 3.603    | 0.465   | 3.208    | 4.115    | 4.493    | 0.188  | 4.277    | 4.618    |
| 2780 | ENSG00000163820 | FYCO1   | -1.1 | 0.0729003 | 0.1690844 | 8.999    | 0.456   | 8.521    | 9.430    | 10.037   | 0.420  | 9.644    | 10.479   |
| 2782 | ENSG00000010810 | FYN     | 1.1  | 0.0232513 | 0.0709324 | 25.412   | 0.648   | 24.959   | 26.154   | 23.867   | 1.843  | 22.249   | 25.873   |
| 2783 | ENSG00000122068 | FYTTD1  | 1.4  | 1.13E-08  | 4.154E-07 | 19.501   | 1.591   | 17.681   | 20.626   | 14.562   | 1.085  | 13.330   | 15.377   |
| 2784 | ENSG00000180340 | FZD2    | -1.4 | 8.23E-05  | 0.0007703 | 14.709   | 2.112   | 12.312   | 16.295   | 20.610   | 3.317  | 18.569   | 24.437   |
| 2785 | ENSG00000104290 | FZD3    | -1.1 | 0.0134347 | 0.0462395 | 16.668   | 0.726   | 15.831   | 17.124   | 18.765   | 1.560  | 17.043   | 20.082   |
| 2786 | ENSG00000163251 | FZD5    | -1.2 | 5.867E-06 | 8.505E-05 | 22.709   | 0.856   | 21.988   | 23.654   | 27.732   | 1.007  | 27.041   | 28.888   |
| 2787 | ENSG00000164930 | FZD6    | 1.2  | 0.0031144 | 0.014533  | 18.290   | 0.465   | 17.776   | 18.681   | 16.001   | 0.276  | 15.724   | 16.275   |
| 2788 | ENSG00000155760 | FZD7    | -1.1 | 0.0005646 | 0.0036943 | 149.515  | 8.524   | 139.763  | 155.550  | 170.521  | 11.008 | 162.692  | 183.107  |

|      | A               | B          | C    | D         | E         | F        | G      | H        | I        | J        | K       | L        | M        |
|------|-----------------|------------|------|-----------|-----------|----------|--------|----------|----------|----------|---------|----------|----------|
| 2791 | ENSG00000105325 | FZR1       | -1.3 | 1.222E-05 | 0.0001582 | 12.182   | 1.307  | 10.965   | 13.563   | 16.047   | 1.401   | 15.096   | 17.656   |
| 2792 | ENSG00000092140 | G2E3       | -1.3 | 3.614E-07 | 8.194E-06 | 38.823   | 1.778  | 37.250   | 40.751   | 49.830   | 2.289   | 47.639   | 52.205   |
| 2794 | ENSG00000138757 | G3BP2      | 1.1  | 0.0110005 | 0.0393594 | 224.408  | 7.198  | 216.853  | 231.184  | 214.151  | 4.168   | 210.032  | 218.366  |
| 2795 | ENSG00000171298 | GAA        | -1.1 | 0.0230906 | 0.0705186 | 17.689   | 0.805  | 16.791   | 18.349   | 20.187   | 2.097   | 18.102   | 22.295   |
| 2796 | ENSG00000160219 | GAB3       | 2    | 0.0007343 | 0.0045443 | 0.852    | 0.095  | 0.763    | 0.952    | 0.442    | 0.132   | 0.353    | 0.593    |
| 2800 | ENSG00000170296 | GABARAP    | 1.1  | 0.0446392 | 0.11636   | 24.524   | 1.436  | 23.000   | 25.851   | 22.410   | 2.106   | 20.180   | 24.364   |
| 2802 | ENSG00000139112 | GABARAPL1  | 1.1  | 0.0002452 | 0.0018808 | 88.014   | 1.480  | 86.307   | 88.932   | 79.805   | 1.751   | 78.011   | 81.510   |
| 2803 | ENSG00000104064 | GABPB1     | 1.1  | 0.0271363 | 0.0798035 | 11.890   | 0.687  | 11.345   | 12.662   | 11.172   | 0.080   | 11.085   | 11.244   |
| 2804 | ENSG00000244879 | GABPB1-AS1 | -1.4 | 7.79E-12  | 6.93E-10  | 17.338   | 0.404  | 16.877   | 17.627   | 24.749   | 1.231   | 23.848   | 26.152   |
| 2807 | ENSG00000022355 | GABRA1     | 1.5  | 0.0544297 | 0.1355574 | 0.477    | 0.053  | 0.426    | 0.532    | 0.323    | 0.048   | 0.269    | 0.361    |
| 2808 | ENSG00000151834 | GABRA2     | 1.5  | 0.0588051 | 0.1434131 | 0.244    | 0.006  | 0.237    | 0.248    | 0.170    | 0.040   | 0.130    | 0.210    |
| 2811 | ENSG00000011677 | GABRA3     | -1.3 | 0.0121986 | 0.0428415 | 2.898    | 0.323  | 2.676    | 3.269    | 3.756    | 0.252   | 3.519    | 4.020    |
| 2813 | ENSG00000113327 | GABRG2     | 1.4  | 0.024037  | 0.0727259 | 0.287    | 0.028  | 0.258    | 0.314    | 0.211    | 0.031   | 0.175    | 0.232    |
| 2814 | ENSG00000094755 | GABRP      | -1.4 | 6.161E-07 | 1.282E-05 | 8.401    | 1.191  | 7.480    | 9.745    | 12.338   | 0.534   | 11.796   | 12.864   |
| 2815 | ENSG00000268089 | GABRQ      | -1.1 | 0.0121905 | 0.0428289 | 8.439    | 0.671  | 7.846    | 9.168    | 9.922    | 0.381   | 9.503    | 10.248   |
| 2817 | ENSG00000116717 | GADD45A    | 1.4  | 3.356E-05 | 0.0003659 | 31.991   | 3.622  | 28.875   | 35.966   | 23.357   | 3.893   | 19.666   | 27.425   |
| 2818 | ENSG00000099860 | GADD45B    | 1.5  | 7.028E-05 | 0.0006776 | 11.566   | 1.166  | 10.383   | 12.715   | 8.076    | 0.089   | 7.974    | 8.135    |
| 2819 | ENSG00000130222 | GADD45G    | -2.6 | 7.80E-13  | 8.62E-11  | 7.808    | 1.062  | 6.594    | 8.565    | 20.830   | 2.204   | 19.284   | 23.354   |
| 2820 | ENSG00000069482 | GAL        | 1.2  | 6.406E-05 | 0.0006288 | 77.816   | 2.561  | 76.029   | 80.750   | 64.699   | 3.952   | 60.925   | 68.809   |
| 2821 | ENSG00000128242 | GAL3ST1    | -1.2 | 0.0338457 | 0.09457   | 4.026    | 0.123  | 3.918    | 4.160    | 5.051    | 0.821   | 4.149    | 5.754    |
| 2822 | ENSG00000197093 | GAL3ST4    | -1.2 | 0.0370472 | 0.1009473 | 6.105    | 0.577  | 5.476    | 6.611    | 7.509    | 0.293   | 7.178    | 7.735    |
| 2823 | ENSG00000117308 | GALE       | 1.8  | 1.46E-11  | 1.184E-09 | 14.717   | 1.093  | 13.483   | 15.561   | 8.150    | 0.961   | 7.216    | 9.135    |
| 2825 | ENSG00000141012 | GALNS      | 1.2  | 0.0738712 | 0.1705643 | 2.438    | 0.296  | 2.234    | 2.778    | 2.152    | 0.167   | 1.966    | 2.290    |
| 2828 | ENSG00000141429 | GALNT1     | 1.2  | 1.493E-05 | 0.0001857 | 70.196   | 3.799  | 66.267   | 73.851   | 61.499   | 2.170   | 58.993   | 62.774   |
| 2829 | ENSG00000178234 | GALNT11    | 1.4  | 2.72E-11  | 2.045E-09 | 23.493   | 0.311  | 23.223   | 23.833   | 17.021   | 0.968   | 16.328   | 18.127   |
| 2830 | ENSG00000110328 | GALNT18    | -1.2 | 0.0843414 | 0.1889109 | 3.405    | 0.576  | 3.012    | 4.067    | 4.134    | 0.707   | 3.383    | 4.786    |
| 2832 | ENSG00000143641 | GALNT2     | 1.1  | 0.0049166 | 0.0208719 | 49.251   | 0.815  | 48.700   | 50.187   | 46.409   | 1.201   | 45.520   | 47.775   |
| 2834 | ENSG00000109586 | GALNT7     | 1.2  | 6.053E-08 | 1.753E-06 | 54.994   | 4.157  | 51.412   | 59.553   | 45.153   | 0.935   | 44.292   | 46.149   |
| 2835 | ENSG00000166573 | GALR1      | 3.1  | 1.06E-13  | 1.46E-11  | 2.482    | 0.285  | 2.155    | 2.683    | 0.826    | 0.147   | 0.679    | 0.972    |
| 2836 | ENSG00000261609 | GAN        | -1.2 | 3.261E-05 | 0.0003574 | 5.338    | 0.255  | 5.089    | 5.599    | 6.714    | 0.523   | 6.139    | 7.160    |
| 2837 | ENSG00000214013 | GANC       | -1.1 | 0.0795811 | 0.1805649 | 4.035    | 0.209  | 3.814    | 4.230    | 4.569    | 0.137   | 4.412    | 4.664    |
| 2838 | ENSG00000111640 | GAPDH      | -1.1 | 2.997E-06 | 4.773E-05 | 2197.774 | 44.345 | 2161.089 | 2247.054 | 2559.604 | 135.382 | 2404.745 | 2655.534 |
| 2839 | ENSG00000228232 | GAPDHP1    | -1.3 | 1.564E-06 | 2.754E-05 | 168.740  | 4.137  | 164.491  | 172.756  | 215.891  | 20.191  | 193.152  | 231.719  |
| 2840 | ENSG00000216624 | GAPDHP2    | -1.4 | 0.1124707 | 0.2318999 | 0.751    | 0.099  | 0.653    | 0.851    | 1.109    | 0.278   | 0.895    | 1.423    |
| 2841 | ENSG00000165219 | GAPVD1     | -1.2 | 0.0005864 | 0.0038117 | 11.414   | 0.978  | 10.609   | 12.502   | 13.454   | 0.212   | 13.212   | 13.608   |
| 2842 | ENSG00000141441 | GAREM1     | 1.2  | 0.0189784 | 0.0604826 | 3.929    | 0.682  | 3.141    | 4.331    | 3.352    | 0.134   | 3.265    | 3.506    |
| 2843 | ENSG00000157833 | GAREM2     | -1.2 | 0.0111834 | 0.0398703 | 8.771    | 0.824  | 7.930    | 9.577    | 10.592   | 1.623   | 9.357    | 12.430   |
| 2844 | ENSG00000106105 | GARS       | 1.4  | 6.48E-16  | 1.52E-13  | 190.433  | 4.935  | 185.409  | 195.274  | 136.400  | 6.000   | 130.538  | 142.529  |
| 2845 | ENSG00000180447 | GAS1       | -1.5 | 0.0010954 | 0.006334  | 3.389    | 0.448  | 2.874    | 3.689    | 5.098    | 0.325   | 4.724    | 5.313    |

|      | A               | B        | C    | D         | E         | F       | G      | H       | I       | J       | K      | L       | M       |
|------|-----------------|----------|------|-----------|-----------|---------|--------|---------|---------|---------|--------|---------|---------|
| 2846 | ENSG00000234741 | GAS5     | -1.1 | 0.0005242 | 0.003478  | 179.752 | 4.616  | 176.630 | 185.054 | 202.875 | 3.376  | 199.046 | 205.426 |
| 2847 | ENSG00000183087 | GAS6     | -1.2 | 0.0004217 | 0.0029147 | 16.983  | 0.383  | 16.546  | 17.257  | 20.817  | 1.312  | 19.652  | 22.239  |
| 2848 | ENSG00000272695 | GAS6-AS2 | -1.7 | 0.004219  | 0.0185242 | 1.291   | 0.353  | 0.908   | 1.603   | 2.325   | 0.439  | 1.989   | 2.821   |
| 2849 | ENSG0000007237  | GAS7     | 1.2  | 0.0020222 | 0.0102461 | 8.511   | 0.047  | 8.464   | 8.557   | 7.494   | 0.381  | 7.058   | 7.758   |
| 2851 | ENSG00000157259 | GATAD1   | -1.1 | 0.0011864 | 0.0067475 | 42.147  | 1.024  | 41.203  | 43.236  | 48.404  | 2.842  | 46.126  | 51.588  |
| 2852 | ENSG00000143614 | GATAD2B  | -1.1 | 0.0763348 | 0.1747715 | 10.759  | 0.068  | 10.698  | 10.832  | 11.823  | 0.034  | 11.790  | 11.857  |
| 2853 | ENSG00000059691 | GATB     | 1.2  | 0.0009273 | 0.0054914 | 5.552   | 0.161  | 5.375   | 5.690   | 4.771   | 0.350  | 4.504   | 5.167   |
| 2854 | ENSG00000257218 | GATC     | -1.1 | 0.0239884 | 0.0726308 | 20.062  | 0.812  | 19.457  | 20.985  | 22.626  | 1.229  | 21.247  | 23.606  |
| 2855 | ENSG00000177225 | GATD1    | -1.1 | 0.1128335 | 0.2324425 | 25.582  | 1.101  | 24.869  | 26.850  | 27.720  | 1.402  | 26.472  | 29.236  |
| 2856 | ENSG00000171766 | GATM     | 1.7  | 8.265E-10 | 4.136E-08 | 17.716  | 2.330  | 15.489  | 20.137  | 10.929  | 0.343  | 10.593  | 11.278  |
| 2858 | ENSG00000177628 | GBA      | 1.4  | 3.138E-05 | 0.0003465 | 9.115   | 0.587  | 8.437   | 9.471   | 6.600   | 0.382  | 6.367   | 7.041   |
| 2859 | ENSG00000070610 | GBA2     | -1.1 | 0.0354703 | 0.0978008 | 60.790  | 1.950  | 58.744  | 62.628  | 66.405  | 3.338  | 62.631  | 68.968  |
| 2861 | ENSG00000160766 | GBAP1    | 1.3  | 0.0155822 | 0.0520114 | 3.516   | 0.081  | 3.435   | 3.597   | 2.751   | 0.125  | 2.651   | 2.891   |
| 2862 | ENSG00000114480 | GBE1     | -1.1 | 0.0806576 | 0.1824233 | 7.111   | 0.728  | 6.396   | 7.852   | 8.083   | 0.954  | 7.132   | 9.040   |
| 2863 | ENSG00000107862 | GBF1     | -1.2 | 8.756E-07 | 1.71E-05  | 24.565  | 0.305  | 24.233  | 24.835  | 30.926  | 1.494  | 29.528  | 32.500  |
| 2864 | ENSG00000148288 | GBGT1    | -1.2 | 0.098045  | 0.2102759 | 4.852   | 0.538  | 4.334   | 5.408   | 5.793   | 0.659  | 5.169   | 6.483   |
| 2865 | ENSG00000179562 | GCC1     | 1.1  | 0.0411145 | 0.1091803 | 13.037  | 0.528  | 12.428  | 13.352  | 12.089  | 0.457  | 11.635  | 12.549  |
| 2866 | ENSG00000005436 | GCCF2    | 1.1  | 0.01513   | 0.0507725 | 10.427  | 0.330  | 10.158  | 10.796  | 9.402   | 0.267  | 9.100   | 9.605   |
| 2867 | ENSG00000131979 | GCH1     | 1.3  | 0.0002424 | 0.0018629 | 14.375  | 0.836  | 13.668  | 15.297  | 11.474  | 0.805  | 10.578  | 12.137  |
| 2868 | ENSG00000137880 | GCHFR    | 1.1  | 0.037504  | 0.1018309 | 23.932  | 1.851  | 21.795  | 25.009  | 21.366  | 0.294  | 21.038  | 21.606  |
| 2869 | ENSG00000001084 | GCLC     | 1.1  | 0.0351717 | 0.0972914 | 21.849  | 0.636  | 21.232  | 22.502  | 20.747  | 0.735  | 19.910  | 21.289  |
| 2870 | ENSG00000023909 | GCLM     | 1.3  | 1.059E-05 | 0.0001398 | 13.332  | 1.689  | 11.737  | 15.101  | 10.298  | 0.666  | 9.713   | 11.023  |
| 2871 | ENSG00000089154 | GCN1     | -1.1 | 0.0619987 | 0.1492647 | 76.302  | 1.499  | 74.664  | 77.604  | 82.227  | 5.520  | 77.168  | 88.114  |
| 2873 | ENSG00000147174 | GCNA     | -1.4 | 0.0271379 | 0.0798035 | 1.214   | 0.232  | 1.061   | 1.481   | 1.718   | 0.115  | 1.587   | 1.797   |
| 2875 | ENSG00000187210 | GCNT1    | -1.1 | 0.0752818 | 0.1729008 | 7.435   | 0.703  | 6.693   | 8.091   | 8.441   | 0.775  | 7.669   | 9.220   |
| 2876 | ENSG00000176928 | GCNT4    | 2.7  | 9.48E-19  | 4.86E-16  | 12.665  | 1.105  | 11.588  | 13.797  | 4.785   | 0.443  | 4.306   | 5.181   |
| 2877 | ENSG00000140905 | GCSH     | 1.1  | 0.0122503 | 0.0429498 | 24.684  | 1.242  | 23.865  | 26.113  | 22.331  | 1.635  | 20.991  | 24.153  |
| 2879 | ENSG00000224837 | GCSHP5   | 1.1  | 0.0321099 | 0.0910436 | 370.881 | 14.103 | 358.546 | 386.257 | 353.038 | 9.729  | 344.018 | 363.347 |
| 2880 | ENSG00000119125 | GDA      | 1.9  | 2.628E-08 | 8.599E-07 | 2.217   | 0.167  | 2.112   | 2.410   | 1.186   | 0.127  | 1.088   | 1.330   |
| 2881 | ENSG00000104381 | GDAP1    | 1.1  | 0.0060135 | 0.0244075 | 20.481  | 1.209  | 19.616  | 21.862  | 18.476  | 0.267  | 18.180  | 18.699  |
| 2882 | ENSG00000124194 | GDAP1L1  | 1.2  | 0.0193396 | 0.0613563 | 6.476   | 0.224  | 6.281   | 6.721   | 5.419   | 0.195  | 5.230   | 5.620   |
| 2883 | ENSG00000196505 | GDAP2    | 1.1  | 0.0535971 | 0.1339373 | 5.494   | 0.173  | 5.295   | 5.602   | 5.071   | 0.210  | 4.850   | 5.267   |
| 2884 | ENSG00000006007 | GDE1     | 1.1  | 0.0020485 | 0.0103393 | 59.126  | 1.081  | 57.975  | 60.120  | 54.781  | 0.889  | 53.762  | 55.402  |
| 2886 | ENSG00000135414 | GDF11    | -1.3 | 2.4E-05   | 0.0002778 | 12.273  | 0.181  | 12.126  | 12.475  | 15.784  | 1.911  | 14.111  | 17.867  |
| 2889 | ENSG00000130513 | GDF15    | 1.6  | 0.0085069 | 0.0320154 | 76.437  | 7.458  | 67.889  | 81.621  | 48.207  | 16.832 | 31.774  | 65.411  |
| 2892 | ENSG00000203879 | GDI1     | -1.1 | 0.0115463 | 0.0409313 | 35.382  | 1.984  | 33.147  | 36.934  | 39.653  | 1.438  | 38.039  | 40.796  |
| 2894 | ENSG00000057608 | GDI2     | -1.1 | 0.0008691 | 0.0052141 | 312.276 | 4.615  | 309.477 | 317.603 | 347.785 | 3.935  | 343.257 | 350.376 |
| 2897 | ENSG00000153982 | GDPD1    | -1.2 | 0.0580605 | 0.1421712 | 5.037   | 0.397  | 4.626   | 5.419   | 6.078   | 0.108  | 5.956   | 6.161   |
| 2898 | ENSG00000158555 | GDPD5    | 1.2  | 0.0082958 | 0.0314377 | 2.786   | 0.516  | 2.476   | 3.382   | 2.308   | 0.171  | 2.188   | 2.504   |
| 2899 | ENSG00000142252 | GEMIN7   | -1.3 | 0.0003857 | 0.0027146 | 23.177  | 0.563  | 22.795  | 23.824  | 29.697  | 1.662  | 28.061  | 31.384  |
| 2900 | ENSG00000145990 | GFOD1    | 1.2  | 0.0177623 | 0.0574184 | 2.569   | 0.147  | 2.432   | 2.724   | 2.233   | 0.043  | 2.195   | 2.280   |
| 2903 | ENSG00000131459 | GFPT2    | -1   | 0.0931963 | 0.2029915 | 95.134  | 3.016  | 92.414  | 98.378  | 102.043 | 3.507  | 99.450  | 106.033 |
| 2904 | ENSG00000125447 | GGA3     | -1.2 | 1.56E-06  | 2.751E-05 | 22.880  | 0.163  | 22.762  | 23.066  | 28.460  | 0.540  | 27.879  | 28.948  |

|      | A               | B        | C    | D         | E         | F       | G      | H       | I       | J        | K     | L        | M        |
|------|-----------------|----------|------|-----------|-----------|---------|--------|---------|---------|----------|-------|----------|----------|
| 2905 | ENSG0000006625  | GGCT     | 1.2  | 0.0004891 | 0.0032934 | 89.361  | 1.766  | 88.337  | 91.401  | 78.688   | 4.721 | 75.604   | 84.123   |
| 2907 | ENSG00000115486 | GGCX     | -1.2 | 0.0030292 | 0.0142078 | 8.160   | 0.672  | 7.385   | 8.585   | 9.794    | 1.120 | 8.501    | 10.446   |
| 2908 | ENSG00000137563 | GGH      | 1.1  | 0.0549069 | 0.1365448 | 31.665  | 2.006  | 29.690  | 33.700  | 29.649   | 0.782 | 28.881   | 30.445   |
| 2910 | ENSG00000131067 | GGT7     | 1.3  | 3.692E-07 | 8.347E-06 | 29.501  | 1.121  | 28.772  | 30.792  | 23.078   | 1.226 | 22.148   | 24.467   |
| 2913 | ENSG00000146830 | GIGYF1   | -1.2 | 3.262E-08 | 1.026E-06 | 44.818  | 0.303  | 44.483  | 45.070  | 55.533   | 0.725 | 54.750   | 56.180   |
| 2915 | ENSG00000204120 | GIGYF2   | -1.1 | 0.0006337 | 0.0040556 | 24.076  | 0.703  | 23.357  | 24.762  | 27.484   | 1.706 | 25.559   | 28.806   |
| 2917 | ENSG00000145723 | GIN1     | -1.2 | 0.0421106 | 0.1112317 | 6.518   | 0.812  | 5.582   | 7.026   | 7.799    | 0.473 | 7.464    | 8.340    |
| 2919 | ENSG00000131153 | GIN52    | 1.1  | 0.0066776 | 0.026505  | 35.060  | 4.357  | 30.217  | 38.661  | 31.341   | 1.732 | 29.348   | 32.487   |
| 2920 | ENSG00000181938 | GIN53    | 1.4  | 7.114E-05 | 0.0006844 | 5.202   | 0.360  | 4.786   | 5.412   | 3.795    | 0.458 | 3.278    | 4.152    |
| 2921 | ENSG00000147536 | GIN54    | -1.1 | 0.1179402 | 0.2399522 | 32.501  | 1.417  | 31.147  | 33.973  | 35.054   | 1.561 | 33.272   | 36.182   |
| 2923 | ENSG00000137960 | GIPC2    | 1.5  | 0.0140088 | 0.0477877 | 1.293   | 0.062  | 1.227   | 1.350   | 0.880    | 0.113 | 0.756    | 0.977    |
| 2925 | ENSG00000179855 | GIPC3    | -1.7 | 0.0026383 | 0.0127271 | 0.752   | 0.189  | 0.579   | 0.954   | 1.344    | 0.368 | 1.116    | 1.768    |
| 2928 | ENSG00000108262 | GIT1     | -1.1 | 0.0013211 | 0.0073163 | 24.706  | 1.355  | 23.690  | 26.244  | 29.024   | 1.741 | 27.202   | 30.669   |
| 2929 | ENSG00000139436 | GIT2     | 1.2  | 0.0051251 | 0.0215408 | 4.342   | 0.010  | 4.331   | 4.350   | 3.839    | 0.209 | 3.599    | 3.973    |
| 2930 | ENSG00000152661 | GJA1     | -1.2 | 1.127E-06 | 2.106E-05 | 973.375 | 30.040 | 938.707 | 991.712 | 1162.842 | 6.349 | 1155.542 | 1167.073 |
| 2931 | ENSG00000121743 | GJA3     | 1.5  | 0.0023283 | 0.0114708 | 1.791   | 0.157  | 1.615   | 1.916   | 1.248    | 0.168 | 1.141    | 1.441    |
| 2934 | ENSG00000187513 | GJA4     | 1.6  | 0.0572659 | 0.1406556 | 1.524   | 0.137  | 1.377   | 1.649   | 0.990    | 0.096 | 0.904    | 1.093    |
| 2936 | ENSG00000176402 | GJC3     | -1.6 | 0.0347543 | 0.0964396 | 1.948   | 0.559  | 1.324   | 2.403   | 3.207    | 1.144 | 1.944    | 4.175    |
| 2941 | ENSG00000198814 | GK       | 1.2  | 0.0540523 | 0.1348557 | 4.373   | 0.200  | 4.165   | 4.565   | 3.822    | 0.082 | 3.772    | 3.916    |
| 2943 | ENSG00000229894 | GK3P     | 1.5  | 0.0540421 | 0.1348502 | 1.780   | 0.143  | 1.666   | 1.940   | 1.205    | 0.393 | 0.900    | 1.649    |
| 2944 | ENSG00000165113 | GKAP1    | -1.3 | 0.0008845 | 0.0052877 | 9.290   | 0.739  | 8.761   | 10.135  | 12.054   | 1.050 | 11.208   | 13.229   |
| 2945 | ENSG00000170266 | GLB1     | 1.2  | 3.741E-06 | 5.777E-05 | 47.550  | 0.641  | 46.976  | 48.242  | 40.712   | 1.718 | 39.274   | 42.615   |
| 2946 | ENSG00000163521 | GLB1L    | 1.2  | 0.1133972 | 0.2332184 | 3.431   | 0.305  | 3.117   | 3.725   | 2.979    | 0.183 | 2.823    | 3.180    |
| 2947 | ENSG00000138604 | GLCE     | -1.1 | 0.05217   | 0.1312437 | 7.987   | 0.968  | 6.876   | 8.646   | 9.220    | 0.938 | 8.269    | 10.144   |
| 2948 | ENSG00000186417 | GLDN     | 1.4  | 0.0608357 | 0.1472192 | 0.691   | 0.097  | 0.599   | 0.792   | 0.519    | 0.083 | 0.444    | 0.609    |
| 2949 | ENSG00000090863 | GLG1     | -1.1 | 0.0040513 | 0.0179372 | 55.462  | 1.113  | 54.335  | 56.560  | 60.922   | 0.857 | 59.969   | 61.630   |
| 2950 | ENSG00000111087 | GLI1     | 1.2  | 0.0014699 | 0.0079578 | 10.725  | 0.867  | 9.763   | 11.447  | 8.824    | 1.082 | 7.820    | 9.970    |
| 2951 | ENSG00000074047 | GLI2     | -1.2 | 0.0007046 | 0.0043988 | 8.925   | 0.154  | 8.749   | 9.036   | 10.935   | 1.110 | 10.070   | 12.186   |
| 2956 | ENSG00000106571 | GLI3     | -1.2 | 0.0026646 | 0.0128359 | 6.974   | 0.138  | 6.860   | 7.127   | 8.336    | 0.648 | 7.833    | 9.068    |
| 2957 | ENSG00000250571 | GLI4     | -1.3 | 0.0064823 | 0.0258579 | 4.376   | 0.202  | 4.143   | 4.495   | 5.824    | 0.561 | 5.186    | 6.242    |
| 2962 | ENSG00000139278 | GLIPR1   | 3.9  | 1.445E-05 | 0.0001812 | 0.464   | 0.074  | 0.380   | 0.518   | 0.118    | 0.027 | 0.099    | 0.150    |
| 2963 | ENSG00000173401 | GLIPR1L1 | 2.1  | 0.0008974 | 0.0053425 | 2.353   | 0.480  | 1.830   | 2.774   | 1.110    | 0.214 | 0.965    | 1.356    |
| 2966 | ENSG00000122694 | GLIPR2   | -1.3 | 0.000609  | 0.0039285 | 8.454   | 0.641  | 7.738   | 8.973   | 11.239   | 1.219 | 9.862    | 12.182   |
| 2968 | ENSG00000126603 | GLIS2    | -1.2 | 0.0163381 | 0.0539737 | 8.409   | 0.590  | 7.863   | 9.034   | 10.112   | 0.910 | 9.373    | 11.129   |
| 2969 | ENSG00000174842 | GLMN     | -1.1 | 0.0455998 | 0.1183958 | 30.487  | 1.574  | 29.387  | 32.290  | 34.113   | 0.877 | 33.408   | 35.096   |
| 2970 | ENSG00000198715 | GLMP     | 1.1  | 0.0049796 | 0.0210815 | 29.759  | 0.676  | 28.986  | 30.244  | 26.851   | 2.071 | 24.473   | 28.252   |
| 2976 | ENSG00000023572 | GLRX2    | 1.3  | 0.0400104 | 0.1070213 | 7.291   | 2.145  | 4.817   | 8.644   | 5.642    | 0.460 | 5.177    | 6.097    |
| 2977 | ENSG00000108010 | GLRX3    | 1.1  | 0.019174  | 0.0609682 | 59.221  | 2.179  | 57.477  | 61.664  | 55.694   | 2.604 | 54.113   | 58.699   |
| 2979 | ENSG00000135423 | GLS2     | 1.2  | 0.005039  | 0.0212743 | 22.655  | 1.205  | 21.299  | 23.603  | 20.138   | 1.402 | 18.526   | 21.077   |
| 2982 | ENSG00000139433 | GLTP     | -1.1 | 0.105553  | 0.2216011 | 14.176  | 1.343  | 12.631  | 15.060  | 15.939   | 0.536 | 15.402   | 16.475   |
| 2985 | ENSG00000148672 | GLUD1    | 1.1  | 0.0054572 | 0.0225997 | 95.518  | 2.813  | 92.394  | 97.850  | 89.530   | 4.237 | 87.072   | 94.422   |
| 2987 | ENSG00000250959 | GLUD1P3  | -1.5 | 0.0040614 | 0.0179755 | 5.737   | 1.070  | 4.783   | 6.894   | 8.925    | 2.241 | 6.345    | 10.390   |
| 2989 | ENSG00000182890 | GLUD2    | 1.1  | 0.0557056 | 0.1379226 | 30.267  | 3.491  | 26.285  | 32.801  | 28.019   | 0.815 | 27.447   | 28.953   |



|      | A               | B         | C    | D         | E         | F       | G      | H       | I       | J       | K     | L       | M       |
|------|-----------------|-----------|------|-----------|-----------|---------|--------|---------|---------|---------|-------|---------|---------|
| 2991 | ENSG00000135821 | GLUL      | -1.1 | 0.0005237 | 0.0034761 | 91.960  | 1.024  | 91.003  | 93.041  | 103.120 | 3.823 | 98.893  | 106.337 |
| 2996 | ENSG00000166840 | GLYATL1   | 1.2  | 0.0724833 | 0.1682779 | 4.102   | 0.257  | 3.862   | 4.372   | 3.641   | 0.185 | 3.511   | 3.852   |
| 2997 | ENSG00000140632 | GLYR1     | 1.1  | 3.009E-05 | 0.0003346 | 76.426  | 0.122  | 76.328  | 76.563  | 68.523  | 1.434 | 66.968  | 69.793  |
| 2998 | ENSG00000196743 | GM2A      | 1.1  | 0.0025157 | 0.0122441 | 42.117  | 1.461  | 40.743  | 43.652  | 38.649  | 0.903 | 37.607  | 39.180  |
| 3004 | ENSG00000087338 | GMCL1     | -1.1 | 0.0699299 | 0.1637215 | 24.615  | 2.027  | 22.324  | 26.172  | 27.217  | 0.894 | 26.358  | 28.142  |
| 3005 | ENSG00000250903 | GMDS-AS1  | 1.3  | 0.0163424 | 0.0539737 | 0.757   | 0.020  | 0.735   | 0.773   | 0.575   | 0.120 | 0.494   | 0.712   |
| 3006 | ENSG00000162419 | GMEB1     | -1.2 | 0.0012096 | 0.0068536 | 7.711   | 0.550  | 7.081   | 8.097   | 9.422   | 0.030 | 9.401   | 9.457   |
| 3008 | ENSG00000197045 | GMFB      | 1.1  | 0.0105318 | 0.0380202 | 61.699  | 2.481  | 59.534  | 64.407  | 57.214  | 2.646 | 54.733  | 59.999  |
| 3009 | ENSG00000112312 | GMNN      | 1.1  | 0.0002847 | 0.0021223 | 95.305  | 6.443  | 91.461  | 102.743 | 85.399  | 1.283 | 84.642  | 86.881  |
| 3015 | ENSG00000137198 | GMPR      | 2.2  | 0.0004095 | 0.0028433 | 1.835   | 0.444  | 1.335   | 2.183   | 0.856   | 0.180 | 0.696   | 1.051   |
| 3016 | ENSG00000146535 | GNA12     | 1.1  | 0.0025154 | 0.0122441 | 40.321  | 1.644  | 39.121  | 42.195  | 37.093  | 1.443 | 35.628  | 38.512  |
| 3019 | ENSG00000156049 | GNA14     | 1.7  | 3.254E-05 | 0.000357  | 7.998   | 2.143  | 6.735   | 10.472  | 4.910   | 0.798 | 3.995   | 5.460   |
| 3020 | ENSG00000114353 | GNAI2     | -1.1 | 0.0012641 | 0.0070869 | 62.939  | 2.844  | 59.656  | 64.677  | 71.613  | 4.995 | 65.991  | 75.542  |
| 3021 | ENSG00000065135 | GNAI3     | -1.1 | 0.032191  | 0.0911669 | 11.706  | 0.288  | 11.393  | 11.959  | 12.789  | 0.271 | 12.558  | 13.087  |
| 3023 | ENSG00000141404 | GNAL      | -1.1 | 0.0441326 | 0.1154369 | 16.307  | 1.022  | 15.210  | 17.232  | 18.074  | 0.972 | 17.029  | 18.951  |
| 3024 | ENSG00000156052 | GNAQ      | 1.1  | 0.0007443 | 0.004588  | 64.835  | 2.619  | 62.053  | 67.252  | 59.601  | 1.431 | 58.123  | 60.979  |
| 3027 | ENSG00000214077 | GNAQP1    | 1.3  | 0.0028929 | 0.0136554 | 15.153  | 0.611  | 14.731  | 15.854  | 11.560  | 1.170 | 10.261  | 12.532  |
| 3028 | ENSG00000235590 | GNAS-AS1  | -1.3 | 0.0178852 | 0.0577715 | 2.566   | 0.370  | 2.140   | 2.811   | 3.408   | 0.231 | 3.149   | 3.592   |
| 3030 | ENSG00000128266 | GNAZ      | -1.2 | 0.0053942 | 0.0223884 | 8.665   | 0.721  | 8.225   | 9.497   | 10.663  | 0.658 | 9.909   | 11.119  |
| 3031 | ENSG00000172354 | GNB2      | -1.1 | 0.0251752 | 0.0753473 | 62.945  | 2.039  | 60.670  | 64.611  | 69.952  | 3.619 | 66.914  | 73.957  |
| 3032 | ENSG00000159921 | GNE       | 1.1  | 0.1024732 | 0.2168308 | 10.942  | 0.417  | 10.473  | 11.268  | 10.280  | 0.438 | 9.812   | 10.680  |
| 3035 | ENSG00000242616 | GNG10     | 1.5  | 0.0058744 | 0.0240157 | 5.547   | 0.355  | 5.153   | 5.842   | 3.836   | 0.506 | 3.252   | 4.141   |
| 3036 | ENSG00000172380 | GNG12     | 1.2  | 0.0002215 | 0.0017333 | 44.298  | 2.396  | 42.008  | 46.788  | 38.826  | 3.477 | 34.880  | 41.439  |
| 3038 | ENSG00000186469 | GNG2      | 1.2  | 0.0152931 | 0.0512182 | 5.247   | 0.549  | 4.887   | 5.879   | 4.526   | 0.342 | 4.291   | 4.918   |
| 3039 | ENSG00000174021 | GNG5      | 1.1  | 0.0085112 | 0.0320175 | 207.448 | 3.268  | 203.873 | 210.281 | 194.815 | 5.573 | 189.662 | 200.730 |
| 3042 | ENSG00000176533 | GNG7      | -1.2 | 0.0185682 | 0.0594403 | 8.272   | 0.829  | 7.316   | 8.787   | 9.918   | 1.391 | 9.038   | 11.522  |
| 3043 | ENSG00000204590 | GNL1      | 1.1  | 0.0863916 | 0.1922048 | 16.085  | 1.492  | 14.532  | 17.507  | 15.338  | 0.612 | 14.650  | 15.825  |
| 3047 | ENSG00000163938 | GNL3      | -1.1 | 2.635E-05 | 0.0002993 | 159.198 | 10.105 | 148.693 | 168.848 | 185.880 | 2.446 | 184.233 | 188.691 |
| 3048 | ENSG00000130119 | GNL3L     | -1.1 | 0.0260614 | 0.07737   | 15.774  | 1.252  | 14.437  | 16.918  | 18.409  | 0.362 | 17.995  | 18.666  |
| 3050 | ENSG00000113552 | GNPDA1    | 1.2  | 2.029E-09 | 9.226E-08 | 106.081 | 2.328  | 103.398 | 107.569 | 87.115  | 0.366 | 86.787  | 87.510  |
| 3057 | ENSG00000100522 | GNPNAT1   | 1.2  | 1.329E-05 | 0.0001698 | 79.021  | 1.055  | 78.113  | 80.178  | 68.786  | 4.000 | 66.164  | 73.390  |
| 3058 | ENSG00000090581 | GNPTG     | 1.2  | 0.0252144 | 0.0754115 | 9.148   | 0.063  | 9.106   | 9.220   | 8.104   | 0.774 | 7.486   | 8.973   |
| 3059 | ENSG00000135677 | GNS       | 1.3  | 1.712E-10 | 1.069E-08 | 37.602  | 0.615  | 37.128  | 38.297  | 28.873  | 0.250 | 28.721  | 29.162  |
| 3062 | ENSG00000136935 | GOLGA1    | 1.1  | 0.0161649 | 0.0535864 | 8.662   | 0.380  | 8.441   | 9.101   | 7.743   | 0.244 | 7.486   | 7.973   |
| 3063 | ENSG00000167110 | GOLGA2    | -1.3 | 3.556E-10 | 1.985E-08 | 23.633  | 0.213  | 23.480  | 23.877  | 32.262  | 2.121 | 30.576  | 34.643  |
| 3064 | ENSG00000255769 | GOLGA2P10 | -1.1 | 0.0050571 | 0.0213187 | 47.341  | 0.544  | 46.755  | 47.830  | 54.692  | 1.061 | 53.734  | 55.833  |
| 3065 | ENSG00000090615 | GOLGA3    | -1.4 | 8.796E-10 | 4.375E-08 | 9.894   | 0.048  | 9.839   | 9.929   | 13.837  | 0.940 | 12.808  | 14.649  |
| 3070 | ENSG00000066455 | GOLGA5    | -1.1 | 0.0069877 | 0.0274781 | 42.191  | 1.694  | 40.377  | 43.733  | 47.819  | 1.801 | 46.048  | 49.649  |
| 3071 | ENSG00000159289 | GOLGA6A   | -1.3 | 0.0536691 | 0.1340776 | 1.892   | 0.502  | 1.458   | 2.442   | 2.492   | 0.391 | 2.107   | 2.889   |

|      | A               | B         | C    | D         | E         | F       | G     | H       | I       | J       | K     | L       | M       |
|------|-----------------|-----------|------|-----------|-----------|---------|-------|---------|---------|---------|-------|---------|---------|
| 3072 | ENSG00000278662 | GOLGA6L10 | -1.4 | 0.0014565 | 0.0078956 | 2.214   | 0.399 | 1.753   | 2.461   | 3.203   | 0.288 | 2.883   | 3.441   |
| 3073 | ENSG00000197978 | GOLGA6L9  | -1.3 | 1.572E-05 | 0.0001935 | 7.362   | 0.366 | 6.952   | 7.653   | 9.805   | 0.380 | 9.495   | 10.228  |
| 3075 | ENSG00000135052 | GOLM1     | 1.2  | 2.713E-06 | 4.412E-05 | 107.539 | 3.760 | 103.243 | 110.234 | 94.066  | 3.438 | 90.152  | 96.599  |
| 3076 | ENSG00000113384 | GOLPH3    | -1.1 | 0.0003261 | 0.0023619 | 85.428  | 1.568 | 83.774  | 86.893  | 98.818  | 6.298 | 92.511  | 105.106 |
| 3077 | ENSG00000047932 | GOPC      | 1.1  | 0.0146674 | 0.0495577 | 30.373  | 0.852 | 29.529  | 31.233  | 28.077  | 1.260 | 27.001  | 29.463  |
| 3082 | ENSG00000114745 | GORASP1   | -1.1 | 0.0982966 | 0.2106551 | 14.663  | 0.575 | 14.326  | 15.327  | 16.085  | 0.579 | 15.446  | 16.575  |
| 3083 | ENSG00000115806 | GORASP2   | -1.1 | 0.0003693 | 0.0026159 | 41.725  | 2.073 | 40.146  | 44.073  | 48.827  | 2.771 | 45.630  | 50.535  |
| 3084 | ENSG00000108433 | GOSR2     | -1.2 | 0.0044529 | 0.0193305 | 4.904   | 0.402 | 4.667   | 5.368   | 5.801   | 0.258 | 5.643   | 6.099   |
| 3091 | ENSG00000119927 | GPAM      | 1.1  | 0.0795542 | 0.1805314 | 9.282   | 0.601 | 8.871   | 9.972   | 8.752   | 0.550 | 8.234   | 9.328   |
| 3093 | ENSG00000204438 | GPANK1    | -1.1 | 0.0708685 | 0.1653239 | 14.159  | 1.096 | 12.964  | 15.117  | 16.040  | 0.161 | 15.935  | 16.225  |
| 3098 | ENSG00000186281 | GPAT2     | -1.6 | 0.0185775 | 0.0594403 | 0.469   | 0.013 | 0.455   | 0.481   | 0.771   | 0.181 | 0.615   | 0.969   |
| 3102 | ENSG00000138678 | GPAT3     | 1.7  | 0.003505  | 0.0159527 | 1.424   | 0.244 | 1.150   | 1.618   | 0.855   | 0.234 | 0.676   | 1.120   |
| 3104 | ENSG00000158669 | GPAT4     | -1.2 | 7.369E-05 | 0.0007053 | 25.463  | 0.707 | 24.788  | 26.198  | 30.124  | 1.845 | 28.149  | 31.805  |
| 3113 | ENSG00000092978 | GPATCH2   | 1.1  | 0.0479412 | 0.1229631 | 7.725   | 0.371 | 7.309   | 8.023   | 7.123   | 0.163 | 6.972   | 7.295   |
| 3115 | ENSG00000089916 | GPATCH2L  | -1.1 | 0.0009742 | 0.0057387 | 12.691  | 0.213 | 12.481  | 12.908  | 14.488  | 0.736 | 13.674  | 15.109  |
| 3118 | ENSG00000198746 | GPATCH3   | -1.2 | 0.0265574 | 0.0784569 | 9.296   | 0.454 | 8.772   | 9.562   | 11.159  | 0.442 | 10.679  | 11.551  |
| 3121 | ENSG00000160818 | GPATCH4   | -1.1 | 0.008967  | 0.0333388 | 26.497  | 0.646 | 25.839  | 27.131  | 29.935  | 1.156 | 28.975  | 31.218  |
| 3125 | ENSG00000186566 | GPATCH8   | 1.1  | 0.0703574 | 0.1644593 | 30.375  | 1.731 | 28.394  | 31.600  | 29.219  | 1.243 | 28.152  | 30.584  |
| 3126 | ENSG00000062194 | GPBP1     | -1.1 | 0.0161111 | 0.0534392 | 79.932  | 1.448 | 78.889  | 81.586  | 87.130  | 2.067 | 85.520  | 89.461  |
| 3131 | ENSG00000159592 | GPBP1L1   | -1.1 | 5.067E-05 | 0.0005185 | 48.381  | 1.059 | 47.533  | 49.568  | 55.951  | 1.474 | 54.770  | 57.603  |
| 3132 | ENSG00000063660 | GPC1      | 1.3  | 1.093E-05 | 0.000144  | 20.163  | 0.396 | 19.804  | 20.587  | 16.181  | 1.949 | 14.610  | 18.362  |
| 3140 | ENSG00000213420 | GPC2      | -1.5 | 3.35E-14  | 5.39E-12  | 31.152  | 1.417 | 29.602  | 32.381  | 48.952  | 1.629 | 47.223  | 50.458  |
| 3142 | ENSG00000147257 | GPC3      | -1.2 | 8.762E-05 | 0.0008111 | 105.218 | 9.676 | 94.327  | 112.824 | 125.683 | 4.860 | 120.471 | 130.092 |
| 3147 | ENSG00000183098 | GPC6      | -1.2 | 3.874E-05 | 0.0004141 | 11.673  | 0.952 | 10.576  | 12.281  | 14.585  | 0.309 | 14.310  | 14.919  |
| 3149 | ENSG00000125772 | GPCPD1    | 1.4  | 9.502E-07 | 1.829E-05 | 9.231   | 0.852 | 8.248   | 9.758   | 6.924   | 0.230 | 6.663   | 7.096   |
| 3152 | ENSG00000115159 | GPD2      | 1.3  | 9.51E-11  | 6.188E-09 | 30.136  | 1.761 | 28.371  | 31.892  | 22.859  | 0.482 | 22.383  | 23.348  |
| 3156 | ENSG00000105220 | GPI       | -1.2 | 5.999E-07 | 1.254E-05 | 51.468  | 2.269 | 48.928  | 53.295  | 61.980  | 2.280 | 59.377  | 63.623  |
| 3157 | ENSG00000142751 | GPN2      | -1.1 | 0.0862955 | 0.1920668 | 10.251  | 0.699 | 9.456   | 10.764  | 11.540  | 0.747 | 10.960  | 12.383  |
| 3162 | ENSG00000148358 | GPR107    | 1.1  | 0.0381228 | 0.1030314 | 35.549  | 0.306 | 35.203  | 35.783  | 34.244  | 0.363 | 33.838  | 34.535  |
| 3165 | ENSG00000181619 | GPR135    | 1.7  | 0.0057857 | 0.023722  | 0.972   | 0.170 | 0.778   | 1.098   | 0.592   | 0.232 | 0.377   | 0.838   |
| 3166 | ENSG00000077585 | GPR137B   | 1.1  | 0.1129775 | 0.2326259 | 17.172  | 0.696 | 16.369  | 17.615  | 15.833  | 0.698 | 15.037  | 16.344  |
| 3175 | ENSG00000180998 | GPR137C   | 1.2  | 0.0157694 | 0.052491  | 4.097   | 0.343 | 3.825   | 4.482   | 3.428   | 0.630 | 2.784   | 4.042   |
| 3177 | ENSG00000101850 | GPR143    | 1.9  | 4.63E-14  | 7.12E-12  | 39.025  | 1.862 | 37.416  | 41.065  | 21.557  | 0.692 | 21.115  | 22.355  |
| 3189 | ENSG00000164849 | GPR146    | -1.4 | 0.0874537 | 0.1938792 | 0.672   | 0.180 | 0.467   | 0.802   | 0.993   | 0.059 | 0.940   | 1.056   |
| 3191 | ENSG00000175697 | GPR156    | 1.5  | 0.0035116 | 0.0159741 | 1.516   | 0.096 | 1.439   | 1.623   | 1.031   | 0.168 | 0.854   | 1.188   |
| 3197 | ENSG00000151025 | GPR158    | 1.5  | 0.0323279 | 0.0914624 | 0.524   | 0.027 | 0.501   | 0.555   | 0.366   | 0.073 | 0.281   | 0.410   |
| 3201 | ENSG00000173890 | GPR160    | -1.2 | 0.0007651 | 0.0046904 | 15.339  | 0.790 | 14.718  | 16.228  | 18.473  | 0.423 | 18.010  | 18.839  |
| 3208 | ENSG00000250510 | GPR162    | -1.6 | 8.006E-05 | 0.0007531 | 2.711   | 0.602 | 2.332   | 3.405   | 4.531   | 0.760 | 3.799   | 5.316   |
| 3210 | ENSG00000184194 | GPR173    | -1.1 | 0.0386    | 0.1040552 | 10.909  | 1.102 | 9.676   | 11.799  | 12.552  | 1.119 | 11.408  | 13.644  |

|      | A               | B       | C    | D         | E         | F       | G      | H       | I       | J       | K     | L       | M       |
|------|-----------------|---------|------|-----------|-----------|---------|--------|---------|---------|---------|-------|---------|---------|
| 3212 | ENSG00000166073 | GPR176  | 1.3  | 9.11E-12  | 7.86E-10  | 189.194 | 12.662 | 175.045 | 199.459 | 146.036 | 4.038 | 141.892 | 149.960 |
| 3215 | ENSG00000152749 | GPR180  | 1.1  | 0.1163765 | 0.2376743 | 7.706   | 0.221  | 7.464   | 7.899   | 7.304   | 0.017 | 7.288   | 7.321   |
| 3219 | ENSG00000204882 | GPR20   | 1.8  | 0.0008624 | 0.0051833 | 3.652   | 0.713  | 3.021   | 4.425   | 2.077   | 0.474 | 1.538   | 2.423   |
| 3223 | ENSG00000181773 | GPR3    | 1.2  | 0.0296062 | 0.0853904 | 13.725  | 0.773  | 13.102  | 14.590  | 11.951  | 1.923 | 9.766   | 13.384  |
| 3228 | ENSG00000102195 | GPR50   | 1.5  | 0.0760865 | 0.1743464 | 2.176   | 0.727  | 1.514   | 2.953   | 1.510   | 0.834 | 0.941   | 2.468   |
| 3229 | ENSG00000119737 | GPR75   | 1.9  | 0.0052961 | 0.0220625 | 1.237   | 0.220  | 0.986   | 1.397   | 0.653   | 0.019 | 0.631   | 0.666   |
| 3230 | ENSG00000155269 | GPR78   | -1.2 | 0.0583226 | 0.1425654 | 2.162   | 0.414  | 1.714   | 2.530   | 2.622   | 0.081 | 2.555   | 2.712   |
| 3231 | ENSG00000164604 | GPR85   | 2.5  | 0.0457585 | 0.1187166 | 0.093   | 0.012  | 0.080   | 0.101   | 0.036   | 0.013 | 0.021   | 0.045   |
| 3233 | ENSG00000117262 | GPR89A  | 1.1  | 0.0995736 | 0.2125837 | 11.159  | 0.513  | 10.652  | 11.677  | 10.477  | 0.692 | 9.911   | 11.249  |
| 3234 | ENSG00000198932 | GPRASP1 | 1.3  | 0.0206004 | 0.0645929 | 2.956   | 0.549  | 2.364   | 3.449   | 2.393   | 0.198 | 2.264   | 2.621   |
| 3237 | ENSG00000013588 | GPRCSA  | -2.2 | 0.0001938 | 0.0015568 | 0.275   | 0.116  | 0.177   | 0.403   | 0.612   | 0.100 | 0.500   | 0.692   |
| 3238 | ENSG00000167191 | GPRCSB  | 1.1  | 0.0525979 | 0.1321237 | 67.312  | 1.430  | 65.684  | 68.363  | 64.978  | 2.426 | 62.304  | 67.039  |
| 3239 | ENSG00000170412 | GPRCS5C | 1.1  | 0.0550908 | 0.1368812 | 6.853   | 0.124  | 6.718   | 6.961   | 6.339   | 0.100 | 6.227   | 6.421   |
| 3241 | ENSG00000121957 | GPSM2   | -1.1 | 0.0151011 | 0.0506958 | 10.674  | 0.648  | 10.197  | 11.412  | 12.264  | 0.809 | 11.428  | 13.044  |
| 3245 | ENSG00000166123 | GPT2    | 1.5  | 2.65E-13  | 3.27E-11  | 34.360  | 0.324  | 34.022  | 34.669  | 23.505  | 2.180 | 22.119  | 26.017  |
| 3248 | ENSG00000116157 | GPX7    | 1.2  | 0.0064749 | 0.025846  | 15.069  | 1.488  | 13.367  | 16.123  | 12.380  | 1.111 | 11.152  | 13.317  |
| 3249 | ENSG00000164294 | GPX8    | 1.2  | 6.308E-07 | 1.306E-05 | 57.133  | 3.781  | 53.172  | 60.703  | 46.898  | 2.630 | 45.124  | 49.919  |
| 3250 | ENSG00000089351 | GRAMD1A | -1.3 | 2.367E-08 | 7.895E-07 | 34.931  | 0.808  | 34.362  | 35.855  | 46.314  | 3.600 | 42.510  | 49.668  |
| 3253 | ENSG00000023171 | GRAMD1B | -1.3 | 0.0001352 | 0.0011548 | 4.191   | 0.201  | 3.986   | 4.389   | 5.355   | 0.430 | 5.085   | 5.851   |
| 3254 | ENSG00000155324 | GRAMD3  | -1.2 | 0.0058169 | 0.023827  | 9.219   | 0.369  | 8.886   | 9.616   | 11.163  | 0.363 | 10.744  | 11.399  |
| 3255 | ENSG00000075240 | GRAMD4  | -1.2 | 0.0105264 | 0.0380088 | 13.706  | 0.285  | 13.489  | 14.029  | 16.136  | 2.108 | 13.702  | 17.385  |
| 3257 | ENSG00000106070 | GRB10   | 1.3  | 6.091E-08 | 1.761E-06 | 23.246  | 1.257  | 22.182  | 24.633  | 18.860  | 0.890 | 17.898  | 19.653  |
| 3258 | ENSG00000115290 | GRB14   | 1.2  | 0.0038436 | 0.0171794 | 11.651  | 0.151  | 11.488  | 11.786  | 9.772   | 0.107 | 9.660   | 9.873   |
| 3260 | ENSG00000177885 | GRB2    | -1.1 | 0.0096649 | 0.0354351 | 67.283  | 1.542  | 65.505  | 68.250  | 74.430  | 1.459 | 72.827  | 75.679  |
| 3262 | ENSG00000196208 | GREB1   | -1.2 | 0.0006625 | 0.0041949 | 7.210   | 0.292  | 6.872   | 7.382   | 8.695   | 0.888 | 8.031   | 9.705   |
| 3263 | ENSG00000166923 | GREM1   | 1.6  | 0.1233625 | 0.2479418 | 0.088   | 0.029  | 0.071   | 0.121   | 0.055   | 0.011 | 0.043   | 0.064   |
| 3264 | ENSG00000083307 | GRHL2   | -1.1 | 0.025778  | 0.0767441 | 14.496  | 0.551  | 13.863  | 14.874  | 16.333  | 0.372 | 16.083  | 16.760  |
| 3267 | ENSG00000155511 | GRIA1   | -1.9 | 0.0087169 | 0.0326387 | 0.155   | 0.001  | 0.155   | 0.156   | 0.305   | 0.056 | 0.240   | 0.346   |
| 3269 | ENSG00000164418 | GRIK2   | -1.5 | 0.0015073 | 0.0081216 | 1.184   | 0.327  | 0.982   | 1.562   | 1.796   | 0.209 | 1.558   | 1.951   |
| 3270 | ENSG00000163873 | GRIK3   | -1.5 | 0.0005287 | 0.0035054 | 0.991   | 0.151  | 0.818   | 1.095   | 1.489   | 0.189 | 1.353   | 1.705   |
| 3272 | ENSG00000105737 | GRIK5   | -1.1 | 0.0161906 | 0.0536503 | 21.090  | 1.076  | 20.176  | 22.276  | 23.832  | 1.020 | 22.765  | 24.798  |
| 3273 | ENSG00000176884 | GRIN1   | -1.4 | 0.0520204 | 0.1309417 | 0.602   | 0.142  | 0.439   | 0.703   | 0.835   | 0.162 | 0.739   | 1.023   |
| 3274 | ENSG00000183454 | GRIN2A  | -1.8 | 5.584E-08 | 1.648E-06 | 0.807   | 0.114  | 0.726   | 0.937   | 1.449   | 0.058 | 1.386   | 1.499   |
| 3276 | ENSG00000273079 | GRIN2B  | -1.6 | 2.569E-05 | 0.0002933 | 0.316   | 0.011  | 0.305   | 0.327   | 0.518   | 0.075 | 0.432   | 0.566   |
| 3277 | ENSG00000105464 | GRIN2D  | -1.2 | 0.0035878 | 0.0162597 | 6.563   | 0.316  | 6.208   | 6.813   | 8.127   | 0.926 | 7.242   | 9.090   |
| 3278 | ENSG00000178719 | GRINA   | 1.2  | 0.000485  | 0.0032693 | 56.530  | 1.543  | 55.564  | 58.309  | 49.781  | 1.026 | 48.735  | 50.786  |
| 3279 | ENSG00000155974 | GRIP1   | -1.1 | 0.0597175 | 0.1451453 | 6.843   | 0.309  | 6.657   | 7.199   | 7.787   | 0.358 | 7.402   | 8.111   |
| 3280 | ENSG00000144596 | GRIP2   | -1.2 | 0.0094052 | 0.0346406 | 2.847   | 0.370  | 2.598   | 3.272   | 3.478   | 0.343 | 3.103   | 3.777   |
| 3281 | ENSG00000173020 | GRK2    | -1.2 | 0.0005144 | 0.0034357 | 20.933  | 0.834  | 20.342  | 21.886  | 24.837  | 1.604 | 23.767  | 26.681  |
| 3282 | ENSG00000100077 | GRK3    | 1.1  | 0.0871424 | 0.1933918 | 23.536  | 0.908  | 22.585  | 24.393  | 22.620  | 1.545 | 21.601  | 24.397  |
| 3283 | ENSG00000198055 | GRK6    | 1.1  | 0.0372511 | 0.1012906 | 31.551  | 0.172  | 31.439  | 31.750  | 29.531  | 2.758 | 27.904  | 32.716  |

|      | A               | B             | C    | D         | E         | F       | G     | H       | I       | J       | K      | L       | M       |
|------|-----------------|---------------|------|-----------|-----------|---------|-------|---------|---------|---------|--------|---------|---------|
| 3286 | ENSG00000152822 | GRM1          | 1.4  | 0.0397136 | 0.1063283 | 0.944   | 0.156 | 0.813   | 1.117   | 0.708   | 0.076  | 0.662   | 0.796   |
| 3287 | ENSG00000164082 | GRM2          | -1.2 | 0.0945313 | 0.2053176 | 1.260   | 0.100 | 1.144   | 1.323   | 1.543   | 0.286  | 1.246   | 1.816   |
| 3289 | ENSG00000198822 | GRM3          | -1.3 | 0.0257975 | 0.076775  | 1.777   | 0.167 | 1.584   | 1.882   | 2.376   | 0.532  | 1.993   | 2.984   |
| 3290 | ENSG00000179603 | GRM8          | 1.3  | 0.0259098 | 0.0770011 | 1.637   | 0.170 | 1.441   | 1.739   | 1.281   | 0.085  | 1.189   | 1.356   |
| 3292 | ENSG00000030582 | GRN           | 1.2  | 7.867E-07 | 1.561E-05 | 82.346  | 2.240 | 80.201  | 84.669  | 68.721  | 5.563  | 64.306  | 74.970  |
| 3293 | ENSG00000164284 | GRPEL2        | 1.1  | 0.0605927 | 0.1467569 | 28.264  | 0.837 | 27.297  | 28.759  | 26.372  | 0.794  | 25.532  | 27.111  |
| 3294 | ENSG00000126010 | GRPR          | -2.4 | 6.21E-21  | 5.26E-18  | 37.643  | 3.859 | 35.296  | 42.097  | 92.848  | 3.166  | 89.915  | 96.204  |
| 3296 | ENSG00000132463 | GRSF1         | 1.1  | 0.0013587 | 0.0074753 | 56.342  | 0.691 | 55.805  | 57.122  | 52.523  | 0.947  | 51.449  | 53.238  |
| 3299 | ENSG00000139835 | GRTF1         | -1.2 | 9.593E-06 | 0.000129  | 37.790  | 1.008 | 37.042  | 38.936  | 47.144  | 1.661  | 45.269  | 48.432  |
| 3302 | ENSG00000105447 | GRWD1         | -1.1 | 0.0225047 | 0.0690909 | 18.205  | 0.378 | 17.934  | 18.637  | 20.472  | 1.202  | 19.618  | 21.846  |
| 3303 | ENSG00000186088 | GSAP          | 1.4  | 0.0109952 | 0.0393488 | 1.519   | 0.266 | 1.324   | 1.822   | 1.136   | 0.212  | 1.001   | 1.380   |
| 3304 | ENSG00000073605 | GSDMB         | -1.2 | 0.0033715 | 0.0154742 | 10.496  | 1.049 | 9.326   | 11.354  | 12.632  | 0.809  | 11.835  | 13.453  |
| 3305 | ENSG00000104518 | GSDMD         | -1.1 | 0.1023947 | 0.2166919 | 14.908  | 1.071 | 14.037  | 16.104  | 16.630  | 1.245  | 15.886  | 18.067  |
| 3308 | ENSG00000131149 | GSE1          | -1.1 | 0.0028195 | 0.0134062 | 18.978  | 1.065 | 18.341  | 20.207  | 21.566  | 1.158  | 20.420  | 22.735  |
| 3309 | ENSG00000177602 | GSG2          | -1.3 | 1.641E-05 | 0.0002004 | 16.418  | 0.501 | 15.846  | 16.779  | 21.634  | 1.425  | 19.988  | 22.479  |
| 3310 | ENSG00000148180 | GSN           | -1.1 | 0.0964373 | 0.2078382 | 11.888  | 1.429 | 10.412  | 13.265  | 13.388  | 1.168  | 12.435  | 14.692  |
| 3311 | ENSG00000104687 | GSR           | 1.1  | 0.0145411 | 0.0492556 | 78.147  | 2.821 | 75.206  | 80.830  | 73.741  | 2.949  | 71.197  | 76.973  |
| 3312 | ENSG00000100983 | GSS           | 1.2  | 0.0004004 | 0.0028004 | 48.945  | 2.671 | 46.475  | 51.780  | 42.245  | 2.001  | 40.198  | 44.196  |
| 3314 | ENSG00000170899 | GSTA4         | 1.1  | 0.1062555 | 0.2227165 | 36.963  | 2.169 | 34.846  | 39.181  | 35.112  | 1.091  | 33.868  | 35.909  |
| 3315 | ENSG00000138780 | GSTCD         | -1.1 | 0.0026352 | 0.0127158 | 15.544  | 0.615 | 14.958  | 16.183  | 18.106  | 0.835  | 17.146  | 18.664  |
| 3317 | ENSG00000197448 | GSTK1         | 1.1  | 0.0229294 | 0.0701655 | 15.193  | 0.239 | 14.921  | 15.365  | 13.745  | 0.515  | 13.354  | 14.328  |
| 3318 | ENSG00000148834 | GSTO1         | 1.2  | 1.499E-05 | 0.000186  | 80.577  | 2.664 | 77.532  | 82.476  | 67.382  | 3.670  | 63.162  | 69.829  |
| 3319 | ENSG00000084207 | GSTP1         | 1.1  | 0.0037463 | 0.0168334 | 727.035 | 8.105 | 717.869 | 733.256 | 690.834 | 15.032 | 674.519 | 704.122 |
| 3320 | ENSG00000125651 | GTF2F1        | -1.1 | 0.0052172 | 0.0218033 | 43.528  | 0.125 | 43.402  | 43.653  | 49.218  | 0.212  | 49.044  | 49.455  |
| 3321 | ENSG00000188342 | GTF2F2        | -1.1 | 0.0194169 | 0.0615438 | 47.356  | 3.213 | 45.294  | 51.058  | 52.669  | 1.081  | 51.955  | 53.912  |
| 3323 | ENSG00000110768 | GTF2H1        | 1.1  | 0.0596958 | 0.1451252 | 11.248  | 0.403 | 10.810  | 11.604  | 10.576  | 0.207  | 10.340  | 10.727  |
| 3324 | ENSG00000183474 | GTF2H2C       | 1.1  | 0.0856424 | 0.1909651 | 14.262  | 0.511 | 13.686  | 14.656  | 13.547  | 0.972  | 12.852  | 14.657  |
| 3327 | ENSG00000111358 | GTF2H3        | 1.1  | 0.0651633 | 0.1550733 | 30.795  | 1.472 | 29.725  | 32.474  | 29.317  | 0.814  | 28.689  | 30.236  |
| 3328 | ENSG00000006704 | GTF2IRD1      | -1.2 | 6.59E-06  | 9.358E-05 | 15.448  | 0.389 | 15.019  | 15.779  | 19.581  | 0.435  | 19.207  | 20.058  |
| 3329 | ENSG00000196275 | GTF2IRD2      | 1.2  | 0.1137377 | 0.2335939 | 0.933   | 0.079 | 0.845   | 0.997   | 0.779   | 0.078  | 0.711   | 0.864   |
| 3330 | ENSG00000174428 | GTF2IRD2<br>B | 1.3  | 0.0325521 | 0.0919581 | 1.753   | 0.009 | 1.747   | 1.763   | 1.401   | 0.184  | 1.285   | 1.613   |
| 3331 | ENSG00000115207 | GTF3C2        | -1   | 0.0960321 | 0.2073259 | 48.139  | 0.270 | 47.948  | 48.448  | 51.623  | 0.718  | 51.119  | 52.445  |
| 3332 | ENSG00000125484 | GTF3C4        | -1.1 | 0.0177519 | 0.057396  | 21.392  | 0.705 | 20.735  | 22.137  | 23.700  | 1.620  | 22.183  | 25.406  |
| 3333 | ENSG00000148308 | GTF3C5        | -1.2 | 0.000516  | 0.0034442 | 43.968  | 1.542 | 42.555  | 45.613  | 51.734  | 3.428  | 49.620  | 55.689  |
| 3336 | ENSG00000100226 | GTPBP1        | -1.1 | 0.0017178 | 0.0090509 | 50.645  | 3.517 | 46.611  | 53.073  | 57.200  | 1.674  | 56.140  | 59.130  |
| 3337 | ENSG00000105793 | GTPBP10       | 1.2  | 0.0071707 | 0.0280541 | 6.272   | 0.365 | 5.910   | 6.640   | 5.512   | 0.272  | 5.245   | 5.789   |
| 3338 | ENSG00000172432 | GTPBP2        | -1.1 | 0.0928129 | 0.2025032 | 27.508  | 0.798 | 26.694  | 28.289  | 29.937  | 0.885  | 29.306  | 30.948  |
| 3340 | ENSG00000130299 | GTPBP3        | -1.1 | 0.0826514 | 0.1861115 | 16.724  | 0.763 | 15.843  | 17.169  | 18.474  | 0.581  | 17.888  | 19.049  |
| 3341 | ENSG00000107937 | GTPBP4        | -1.1 | 6.208E-05 | 0.0006119 | 50.235  | 1.237 | 49.035  | 51.506  | 57.976  | 0.676  | 57.252  | 58.589  |
| 3343 | ENSG00000178605 | GTPBP6        | 1.1  | 0.0508917 | 0.1287594 | 37.149  | 1.484 | 35.440  | 38.101  | 34.934  | 1.349  | 33.614  | 36.310  |
| 3344 | ENSG00000075218 | GTSE1         | -1.2 | 0.0002378 | 0.0018357 | 32.133  | 1.392 | 31.153  | 33.726  | 38.294  | 2.012  | 36.722  | 40.561  |

|      | A               | B        | C    | D         | E         | F        | G      | H        | I        | J        | K      | L        | M        |
|------|-----------------|----------|------|-----------|-----------|----------|--------|----------|----------|----------|--------|----------|----------|
| 3345 | ENSG00000048545 | GUCA1A   | -1.9 | 3.073E-07 | 7.149E-06 | 4.050    | 0.676  | 3.280    | 4.544    | 7.796    | 0.497  | 7.414    | 8.359    |
| 3348 | ENSG00000112599 | GUCA1B   | -1.5 | 0.0408799 | 0.1086767 | 2.528    | 0.453  | 2.257    | 3.051    | 3.855    | 0.898  | 3.232    | 4.884    |
| 3350 | ENSG00000061918 | GUCY1B3  | 1.6  | 3.749E-05 | 0.0004024 | 5.292    | 1.135  | 4.004    | 6.149    | 3.420    | 0.525  | 2.836    | 3.854    |
| 3351 | ENSG00000070019 | GUCY2C   | -1.4 | 0.0017638 | 0.0092248 | 1.849    | 0.186  | 1.641    | 1.998    | 2.739    | 0.272  | 2.434    | 2.957    |
| 3352 | ENSG00000151806 | GUF1     | 1.2  | 4.722E-05 | 0.0004884 | 51.887   | 0.917  | 51.011   | 52.840   | 45.733   | 2.222  | 43.366   | 47.773   |
| 3357 | ENSG00000143774 | GUK1     | -1.1 | 0.0089043 | 0.0331714 | 18.548   | 0.746  | 17.697   | 19.092   | 21.338   | 0.357  | 21.002   | 21.714   |
| 3358 | ENSG00000144366 | GULP1    | 1.4  | 0.0018138 | 0.0094189 | 107.494  | 11.099 | 99.031   | 120.061  | 78.360   | 8.443  | 72.905   | 88.085   |
| 3359 | ENSG00000183666 | GUSBP1   | 1.6  | 0.0003209 | 0.0023297 | 2.109    | 0.279  | 1.836    | 2.393    | 1.353    | 0.301  | 1.007    | 1.538    |
| 3360 | ENSG00000236296 | GUSBP5   | 1.4  | 0.0434021 | 0.1138784 | 1.712    | 0.296  | 1.410    | 2.003    | 1.237    | 0.421  | 0.885    | 1.703    |
| 3361 | ENSG00000232433 | GXYLT1P3 | 1.5  | 0.0658782 | 0.1564226 | 2.087    | 0.258  | 1.835    | 2.352    | 1.406    | 0.308  | 1.064    | 1.661    |
| 3362 | ENSG00000172986 | GXYLT2   | -1.8 | 6.605E-05 | 0.0006443 | 1.495    | 0.283  | 1.168    | 1.666    | 2.686    | 0.413  | 2.321    | 3.134    |
| 3365 | ENSG00000056998 | GYG2     | 1.1  | 0.0176294 | 0.0570747 | 82.725   | 0.905  | 81.982   | 83.733   | 78.388   | 2.940  | 75.681   | 81.516   |
| 3368 | ENSG00000136732 | GYPC     | 1.6  | 2.294E-10 | 1.361E-08 | 16.858   | 0.756  | 16.349   | 17.727   | 10.813   | 0.577  | 10.468   | 11.479   |
| 3372 | ENSG00000104812 | GYS1     | 1.1  | 0.0919307 | 0.2012979 | 29.662   | 1.057  | 28.878   | 30.863   | 28.443   | 0.433  | 27.944   | 28.694   |
| 3373 | ENSG00000125812 | GZF1     | -1.1 | 0.0237101 | 0.0720065 | 9.271    | 0.566  | 8.618    | 9.601    | 10.753   | 0.772  | 10.049   | 11.578   |
| 3374 | ENSG00000130600 | H19      | -1.9 | 0.0081776 | 0.0311362 | 0.602    | 0.187  | 0.396    | 0.758    | 1.145    | 0.093  | 1.063    | 1.246    |
| 3375 | ENSG00000189060 | H1F0     | -1.2 | 9.683E-06 | 0.00013   | 200.828  | 11.936 | 187.201  | 209.431  | 239.006  | 7.099  | 231.748  | 245.935  |
| 3376 | ENSG00000184897 | H1FX     | -1.3 | 0.016105  | 0.0534353 | 204.590  | 6.433  | 198.718  | 211.466  | 266.711  | 44.713 | 225.993  | 314.562  |
| 3378 | ENSG00000113648 | H2AFY    | 1.2  | 2.013E-05 | 0.0002385 | 18.528   | 1.026  | 17.349   | 19.220   | 16.331   | 0.519  | 15.731   | 16.642   |
| 3379 | ENSG00000164032 | H2AFZ    | 1    | 0.0694287 | 0.162796  | 516.851  | 10.881 | 504.291  | 523.392  | 505.445  | 14.381 | 495.262  | 521.896  |
| 3381 | ENSG00000163041 | H3F3A    | -1.1 | 0.0296758 | 0.0855327 | 222.184  | 1.479  | 220.483  | 223.157  | 239.881  | 3.495  | 236.766  | 243.660  |
| 3382 | ENSG00000235655 | H3F3AP4  | -1.1 | 0.0187254 | 0.0598342 | 1874.597 | 56.060 | 1812.377 | 1921.175 | 2037.551 | 55.593 | 1974.630 | 2080.023 |
| 3383 | ENSG00000178458 | H3F3AP6  | -1.1 | 0.0091362 | 0.0338267 | 492.660  | 17.160 | 474.148  | 508.035  | 548.723  | 17.525 | 532.751  | 567.470  |
| 3384 | ENSG00000130956 | HABP4    | 1.3  | 3.798E-06 | 5.846E-05 | 16.081   | 0.351  | 15.725   | 16.428   | 12.499   | 0.574  | 11.870   | 12.995   |
| 3387 | ENSG00000165996 | HACD1    | 1.4  | 6.539E-05 | 0.000639  | 8.921    | 0.631  | 8.498    | 9.646    | 6.653    | 0.671  | 5.999    | 7.339    |
| 3389 | ENSG00000206527 | HACD2    | 1.1  | 0.0531362 | 0.1330667 | 25.018   | 0.318  | 24.711   | 25.346   | 23.718   | 1.327  | 22.463   | 25.107   |
| 3390 | ENSG00000188921 | HACD4    | 1.3  | 0.0352837 | 0.0974608 | 1.279    | 0.161  | 1.178    | 1.465    | 1.034    | 0.185  | 0.821    | 1.154    |
| 3391 | ENSG00000131373 | HACL1    | -1.1 | 0.0536561 | 0.134065  | 33.679   | 0.379  | 33.260   | 33.997   | 37.185   | 1.697  | 35.273   | 38.512   |
| 3392 | ENSG00000138796 | HADH     | 1.2  | 9.694E-05 | 0.0008805 | 17.860   | 1.056  | 16.871   | 18.971   | 15.546   | 0.912  | 14.803   | 16.564   |
| 3393 | ENSG00000084754 | HADHA    | 1.2  | 9.591E-07 | 1.841E-05 | 172.638  | 1.723  | 171.426  | 174.611  | 151.871  | 4.157  | 147.531  | 155.817  |
| 3394 | ENSG00000173805 | HAP1     | -1.2 | 0.0362623 | 0.0994654 | 2.072    | 0.241  | 1.898    | 2.346    | 2.619    | 0.062  | 2.548    | 2.664    |
| 3397 | ENSG00000145681 | HAPLN1   | -2.4 | 0.0006834 | 0.0042936 | 0.199    | 0.087  | 0.106    | 0.278    | 0.490    | 0.115  | 0.357    | 0.562    |
| 3398 | ENSG00000140511 | HAPLN3   | -1.3 | 1.966E-08 | 6.637E-07 | 32.050   | 2.409  | 30.124   | 34.752   | 43.425   | 2.119  | 41.438   | 45.656   |
| 3399 | ENSG00000112855 | HARS2    | -1.2 | 0.0012919 | 0.0071993 | 24.935   | 1.327  | 23.409   | 25.820   | 29.467   | 0.555  | 29.088   | 30.105   |
| 3400 | ENSG00000128708 | HAT1     | 1.1  | 0.0417399 | 0.1104423 | 35.550   | 0.193  | 35.326   | 35.662   | 33.988   | 1.032  | 33.278   | 35.172   |
| 3402 | ENSG00000249115 | HAUS5    | 1.3  | 1.761E-05 | 0.0002132 | 11.763   | 0.373  | 11.346   | 12.066   | 9.393    | 0.218  | 9.150    | 9.569    |
| 3403 | ENSG00000147874 | HAUS6    | -1.1 | 0.0167968 | 0.0551298 | 42.233   | 1.236  | 41.485   | 43.659   | 46.601   | 1.791  | 44.836   | 48.416   |
| 3404 | ENSG00000227344 | HAUS6P1  | -1.1 | 0.107573  | 0.2248965 | 24.607   | 1.232  | 23.337   | 25.797   | 27.601   | 0.510  | 27.235   | 28.184   |
| 3405 | ENSG00000143575 | HAX1     | 1.2  | 7.879E-06 | 0.0001089 | 69.095   | 3.334  | 67.142   | 72.944   | 57.666   | 3.878  | 53.280   | 60.642   |
| 3406 | ENSG00000105856 | HBP1     | -1.1 | 0.0792416 | 0.1801363 | 24.564   | 0.550  | 23.951   | 25.014   | 26.765   | 0.564  | 26.356   | 27.409   |
| 3408 | ENSG00000112339 | HBS1L    | -1.1 | 0.0001161 | 0.0010206 | 24.577   | 0.445  | 24.189   | 25.062   | 28.551   | 0.543  | 27.956   | 29.020   |
| 3410 | ENSG00000004961 | HCCS     | 1.1  | 0.0904423 | 0.1990177 | 28.732   | 1.506  | 27.372   | 30.351   | 26.877   | 2.362  | 24.372   | 29.065   |
| 3411 | ENSG00000172534 | HCFC1    | -1.1 | 0.0008906 | 0.0053096 | 50.122   | 1.434  | 48.472   | 51.063   | 57.755   | 4.680  | 52.985   | 62.341   |

|      | A               | B       | C    | D         | E         | F       | G     | H       | I       | J       | K     | L       | M       |
|------|-----------------|---------|------|-----------|-----------|---------|-------|---------|---------|---------|-------|---------|---------|
| 3413 | ENSG00000228223 | HCG11   | -1.1 | 0.0989997 | 0.2118666 | 18.558  | 0.265 | 18.349  | 18.857  | 20.688  | 0.861 | 19.698  | 21.253  |
| 3414 | ENSG00000231074 | HCG18   | 1.1  | 0.0994933 | 0.2125196 | 8.713   | 0.079 | 8.624   | 8.779   | 8.361   | 0.375 | 8.082   | 8.787   |
| 3415 | ENSG00000101336 | HCK     | -1.4 | 0.0440866 | 0.1153345 | 0.895   | 0.198 | 0.717   | 1.108   | 1.323   | 0.023 | 1.306   | 1.349   |
| 3416 | ENSG00000164588 | HCN1    | -1.2 | 0.0106087 | 0.0382325 | 1.376   | 0.141 | 1.239   | 1.520   | 1.746   | 0.170 | 1.553   | 1.872   |
| 3417 | ENSG00000099822 | HCN2    | -1.3 | 0.0454904 | 0.1181841 | 2.175   | 0.501 | 1.719   | 2.710   | 2.886   | 0.323 | 2.681   | 3.258   |
| 3421 | ENSG00000143630 | HCN3    | 1.3  | 0.0122834 | 0.043021  | 3.439   | 0.250 | 3.153   | 3.615   | 2.735   | 0.300 | 2.391   | 2.939   |
| 3423 | ENSG00000100429 | HDAC10  | -1.4 | 0.1059659 | 0.2222195 | 0.628   | 0.105 | 0.542   | 0.746   | 0.867   | 0.181 | 0.742   | 1.074   |
| 3424 | ENSG00000196591 | HDAC2   | -1   | 0.0554372 | 0.1374667 | 86.245  | 0.857 | 85.284  | 86.929  | 92.228  | 1.855 | 90.090  | 93.408  |
| 3425 | ENSG00000068024 | HDAC4   | -1.1 | 0.0046686 | 0.0200663 | 4.573   | 0.225 | 4.354   | 4.803   | 5.372   | 0.287 | 5.156   | 5.698   |
| 3426 | ENSG00000108840 | HDAC5   | -1.2 | 8.405E-05 | 0.0007832 | 23.760  | 1.539 | 22.211  | 25.289  | 28.354  | 1.298 | 27.541  | 29.851  |
| 3427 | ENSG00000094631 | HDAC6   | -1.1 | 0.0088215 | 0.0329354 | 7.873   | 0.430 | 7.473   | 8.328   | 9.071   | 0.490 | 8.607   | 9.583   |
| 3428 | ENSG00000061273 | HDAC7   | -1.1 | 0.0123409 | 0.0431422 | 22.340  | 0.161 | 22.159  | 22.465  | 24.987  | 1.178 | 23.937  | 26.261  |
| 3430 | ENSG00000048052 | HDAC9   | -1.3 | 8.899E-06 | 0.0001207 | 2.691   | 0.199 | 2.501   | 2.897   | 3.650   | 0.155 | 3.544   | 3.828   |
| 3431 | ENSG00000143321 | HDGF    | -1.1 | 7.194E-05 | 0.0006909 | 215.708 | 7.820 | 206.998 | 222.125 | 246.647 | 6.426 | 239.390 | 251.617 |
| 3433 | ENSG00000069998 | HDHD5   | -1.1 | 0.0646032 | 0.1541093 | 25.681  | 1.378 | 24.199  | 26.924  | 28.234  | 2.364 | 26.372  | 30.893  |
| 3435 | ENSG00000115677 | HDLBP   | 1.1  | 0.0053582 | 0.0222716 | 88.635  | 0.753 | 88.057  | 89.486  | 84.333  | 3.157 | 80.772  | 86.788  |
| 3436 | ENSG00000165259 | HDX     | 1.2  | 0.0107996 | 0.0387881 | 3.326   | 0.275 | 3.161   | 3.644   | 2.758   | 0.184 | 2.586   | 2.953   |
| 3437 | ENSG00000068097 | HEATR6  | 1.1  | 0.0184557 | 0.0591962 | 19.296  | 0.772 | 18.683  | 20.163  | 17.808  | 0.853 | 16.945  | 18.650  |
| 3438 | ENSG00000013583 | HEBP1   | -1.2 | 8.846E-05 | 0.0008171 | 16.439  | 0.671 | 15.710  | 17.029  | 20.610  | 0.438 | 20.218  | 21.083  |
| 3439 | ENSG00000112406 | HECA    | -1.2 | 0.0006145 | 0.0039586 | 12.590  | 0.331 | 12.211  | 12.821  | 15.275  | 1.253 | 14.375  | 16.707  |
| 3440 | ENSG00000092148 | HECTD1  | 1.1  | 0.0001119 | 0.0009877 | 52.969  | 1.918 | 50.852  | 54.592  | 48.512  | 0.301 | 48.214  | 48.815  |
| 3441 | ENSG00000165338 | HECTD2  | 1.2  | 0.0212577 | 0.0661633 | 5.160   | 0.339 | 4.771   | 5.394   | 4.573   | 0.452 | 4.205   | 5.078   |
| 3444 | ENSG00000002746 | HECW1   | 1.3  | 0.0311422 | 0.0888619 | 0.986   | 0.144 | 0.899   | 1.152   | 0.802   | 0.044 | 0.753   | 0.840   |
| 3445 | ENSG00000138411 | HECW2   | 1.2  | 0.0592026 | 0.1441539 | 1.377   | 0.025 | 1.349   | 1.397   | 1.186   | 0.176 | 1.039   | 1.380   |
| 3446 | ENSG00000173706 | HEG1    | 1.6  | 8.241E-10 | 4.136E-08 | 6.123   | 0.378 | 5.749   | 6.505   | 3.805   | 0.489 | 3.346   | 4.319   |
| 3449 | ENSG00000281344 | HELLPAR | -1.3 | 0.0349953 | 0.0969528 | 0.058   | 0.011 | 0.046   | 0.068   | 0.074   | 0.006 | 0.068   | 0.080   |
| 3452 | ENSG00000119969 | HELLS   | -1.1 | 0.0023725 | 0.011658  | 31.422  | 1.122 | 30.155  | 32.291  | 35.522  | 2.118 | 33.147  | 37.216  |
| 3454 | ENSG00000163312 | HELQ    | -1.2 | 0.0551075 | 0.1368951 | 5.332   | 0.815 | 4.496   | 6.124   | 6.398   | 0.442 | 5.897   | 6.734   |
| 3455 | ENSG00000130589 | HELZ2   | -1.1 | 0.02219   | 0.0682859 | 6.964   | 0.212 | 6.820   | 7.207   | 7.994   | 0.705 | 7.504   | 8.801   |
| 3457 | ENSG00000114735 | HEMK1   | -1.1 | 0.0644896 | 0.1538815 | 2.127   | 0.052 | 2.069   | 2.166   | 2.442   | 0.106 | 2.320   | 2.512   |
| 3458 | ENSG00000162639 | HENMT1  | 1.2  | 0.0496916 | 0.126402  | 7.284   | 0.462 | 6.755   | 7.607   | 6.295   | 0.471 | 5.847   | 6.786   |
| 3459 | ENSG00000089472 | HEPH    | -1.1 | 0.0177945 | 0.0575117 | 31.143  | 2.128 | 28.686  | 32.423  | 34.578  | 1.574 | 33.176  | 36.280  |
| 3460 | ENSG00000276550 | HERC2P2 | -1.2 | 1.982E-05 | 0.0002361 | 12.093  | 0.733 | 11.652  | 12.940  | 15.346  | 0.619 | 14.684  | 15.910  |
| 3461 | ENSG00000180229 | HERC2P3 | -1.2 | 0.0002547 | 0.001939  | 10.538  | 0.759 | 9.787   | 11.305  | 12.892  | 0.272 | 12.595  | 13.128  |
| 3462 | ENSG00000206149 | HERC2P9 | -1.1 | 0.0017048 | 0.0089935 | 11.770  | 0.339 | 11.507  | 12.153  | 13.822  | 0.168 | 13.717  | 14.015  |
| 3463 | ENSG00000148634 | HERC4   | -1.1 | 0.0418537 | 0.1106394 | 14.920  | 0.360 | 14.694  | 15.336  | 16.442  | 1.425 | 15.505  | 18.082  |
| 3464 | ENSG00000138646 | HERC5   | 1.3  | 1.212E-06 | 2.225E-05 | 30.347  | 1.941 | 28.197  | 31.970  | 24.552  | 1.247 | 23.461  | 25.912  |
| 3465 | ENSG00000138642 | HERC6   | 1.2  | 0.0053905 | 0.0223839 | 4.936   | 0.342 | 4.588   | 5.272   | 4.096   | 0.241 | 3.915   | 4.370   |
| 3466 | ENSG00000051108 | HERPUD1 | 1.5  | 5.129E-08 | 1.525E-06 | 7.624   | 0.456 | 7.275   | 8.139   | 5.042   | 0.353 | 4.694   | 5.400   |
| 3467 | ENSG00000122557 | HERPUD2 | 1.1  | 0.0067684 | 0.0267588 | 23.881  | 0.532 | 23.334  | 24.396  | 21.388  | 1.765 | 19.377  | 22.673  |
| 3468 | ENSG00000114315 | HES1    | 1.2  | 0.0015429 | 0.00829   | 19.846  | 1.306 | 18.424  | 20.993  | 16.617  | 1.283 | 15.321  | 17.887  |
| 3469 | ENSG00000069812 | HES2    | -2   | 0.0006642 | 0.0041994 | 0.502   | 0.253 | 0.331   | 0.792   | 1.045   | 0.197 | 0.833   | 1.222   |
| 3470 | ENSG00000188290 | HES4    | 1.5  | 0.0257552 | 0.0767034 | 6.230   | 0.961 | 5.547   | 7.329   | 4.388   | 1.953 | 2.223   | 6.015   |

|      | A               | B              | C    | D         | E         | F       | G     | H       | I       | J       | K      | L       | M       |
|------|-----------------|----------------|------|-----------|-----------|---------|-------|---------|---------|---------|--------|---------|---------|
| 3472 | ENSG00000163666 | HESX1          | -1.2 | 0.0950831 | 0.2059927 | 5.773   | 1.224 | 4.536   | 6.984   | 7.275   | 1.037  | 6.266   | 8.337   |
| 3474 | ENSG00000213614 | HEXA           | 1.3  | 3.734E-06 | 5.773E-05 | 8.909   | 0.784 | 8.388   | 9.811   | 7.154   | 0.120  | 7.027   | 7.266   |
| 3475 | ENSG00000049860 | HEXB           | 1.2  | 1.5E-06   | 2.668E-05 | 56.674  | 3.967 | 54.190  | 61.249  | 47.245  | 3.573  | 44.074  | 51.117  |
| 3476 | ENSG00000186834 | HEXIM1         | 1.2  | 0.0007432 | 0.0045861 | 40.758  | 2.515 | 38.921  | 43.624  | 35.455  | 0.904  | 34.684  | 36.450  |
| 3478 | ENSG00000135547 | HEY2           | -1.3 | 0.0114973 | 0.0407747 | 5.244   | 0.627 | 4.689   | 5.925   | 6.711   | 0.608  | 6.089   | 7.304   |
| 3479 | ENSG00000168509 | HFE2           | 1.6  | 0.0344078 | 0.0957137 | 1.490   | 0.473 | 1.099   | 2.016   | 0.973   | 0.268  | 0.706   | 1.242   |
| 3480 | ENSG00000162669 | HFM1           | 1.7  | 2.105E-06 | 3.546E-05 | 3.245   | 0.116 | 3.145   | 3.372   | 1.895   | 0.475  | 1.423   | 2.372   |
| 3481 | ENSG00000235173 | HGH1           | -1.2 | 0.0015597 | 0.0083532 | 16.667  | 0.851 | 16.013  | 17.629  | 20.541  | 1.551  | 18.919  | 22.009  |
| 3482 | ENSG00000185359 | HGS            | -1.1 | 0.0010481 | 0.0061019 | 15.498  | 0.244 | 15.324  | 15.777  | 18.028  | 0.946  | 17.429  | 19.119  |
| 3483 | ENSG00000165102 | HGSNAT         | 1.5  | 1.114E-05 | 0.000146  | 3.727   | 0.586 | 3.205   | 4.361   | 2.569   | 0.343  | 2.291   | 2.952   |
| 3484 | ENSG00000106049 | HIBADH         | 1.2  | 2.272E-05 | 0.0002656 | 88.958  | 3.116 | 85.803  | 92.033  | 77.115  | 2.191  | 75.218  | 79.512  |
| 3485 | ENSG00000198130 | HIBCH          | 1.2  | 0.0007899 | 0.0048193 | 17.505  | 0.766 | 16.625  | 18.024  | 15.535  | 0.779  | 15.033  | 16.432  |
| 3486 | ENSG00000100644 | HIF1A          | 1.1  | 0.0820783 | 0.1851662 | 154.363 | 2.880 | 151.877 | 157.519 | 149.275 | 11.302 | 137.933 | 160.537 |
| 3488 | ENSG00000124440 | HIF3A          | -1.1 | 0.0250582 | 0.0750901 | 7.696   | 0.388 | 7.404   | 8.136   | 8.821   | 0.812  | 7.955   | 9.566   |
| 3489 | ENSG00000181061 | HIGD1A         | 1.1  | 0.0051567 | 0.0216279 | 87.111  | 0.693 | 86.574  | 87.894  | 78.070  | 4.780  | 74.838  | 83.560  |
| 3491 | ENSG00000258016 | HIGD1AP1       | 1.2  | 0.0370349 | 0.1009299 | 92.990  | 4.936 | 89.028  | 98.519  | 80.797  | 6.944  | 72.797  | 85.264  |
| 3493 | ENSG00000135245 | HILPDA         | -1.1 | 0.1221852 | 0.2462779 | 19.183  | 1.833 | 17.700  | 21.232  | 21.370  | 0.599  | 21.007  | 22.062  |
| 3495 | ENSG00000172273 | HINFP          | -1.1 | 0.0300055 | 0.0863065 | 5.517   | 0.353 | 5.122   | 5.801   | 6.315   | 0.454  | 6.016   | 6.837   |
| 3496 | ENSG00000127946 | HIP1           | -1.1 | 0.0288085 | 0.0836748 | 56.600  | 2.500 | 53.926  | 58.878  | 61.630  | 2.389  | 58.997  | 63.657  |
| 3497 | ENSG00000130787 | HIP1R          | 1.2  | 0.0017861 | 0.0093006 | 6.825   | 0.488 | 6.372   | 7.342   | 5.780   | 0.390  | 5.368   | 6.144   |
| 3498 | ENSG00000163349 | HIPK1          | -1.1 | 0.0025207 | 0.0122649 | 33.161  | 0.490 | 32.655  | 33.634  | 37.125  | 1.247  | 35.695  | 37.987  |
| 3499 | ENSG00000064393 | HIPK2          | 1.2  | 4.014E-05 | 0.0004276 | 13.569  | 1.225 | 12.596  | 14.945  | 11.581  | 0.275  | 11.414  | 11.898  |
| 3500 | ENSG00000100084 | HIRA           | 1.1  | 0.0164675 | 0.0543125 | 11.834  | 0.462 | 11.332  | 12.244  | 10.658  | 0.378  | 10.223  | 10.908  |
| 3501 | ENSG00000149929 | HIRIP3         | -1.2 | 0.0036093 | 0.016343  | 14.068  | 0.506 | 13.484  | 14.364  | 16.702  | 1.063  | 15.538  | 17.620  |
| 3502 | ENSG00000187837 | HIST1H1C       | -1.7 | 0.0007167 | 0.0044498 | 8.235   | 2.498 | 5.523   | 10.443  | 13.987  | 1.142  | 12.821  | 15.104  |
| 3503 | ENSG00000180573 | HIST1H2AC      | -1.5 | 1.27E-05  | 0.0001636 | 9.619   | 0.405 | 9.200   | 10.009  | 14.334  | 0.522  | 13.780  | 14.815  |
| 3504 | ENSG00000273802 | HIST1H2B<br>G  | -1.7 | 0.0731429 | 0.1694611 | 0.836   | 0.292 | 0.583   | 1.155   | 1.431   | 0.713  | 0.607   | 1.849   |
| 3505 | ENSG00000275713 | HIST1H2BH      | -1.3 | 0.0007089 | 0.0044139 | 7.332   | 0.750 | 6.726   | 8.171   | 10.101  | 0.399  | 9.803   | 10.554  |
| 3506 | ENSG00000124635 | HIST1H2BJ      | 1.6  | 0.0957609 | 0.2070047 | 1.974   | 0.444 | 1.711   | 2.487   | 1.281   | 0.215  | 1.054   | 1.482   |
| 3507 | ENSG00000197238 | HIST1H4J       | -1.5 | 0.0021077 | 0.0105684 | 17.254  | 1.086 | 16.031  | 18.106  | 26.251  | 3.817  | 21.923  | 29.141  |
| 3508 | ENSG00000273542 | HIST1H4K       | -1.4 | 0.003858  | 0.0172301 | 20.837  | 0.717 | 20.112  | 21.545  | 30.515  | 5.191  | 24.605  | 34.338  |
| 3509 | ENSG00000203812 | HIST2H2AA<br>3 | -1.7 | 0.0845791 | 0.1892678 | 1.543   | 0.056 | 1.479   | 1.582   | 2.658   | 0.469  | 2.231   | 3.160   |

|      | A               | B              | C    | D         | E         | F       | G      | H       | I       | J       | K      | L       | M       |
|------|-----------------|----------------|------|-----------|-----------|---------|--------|---------|---------|---------|--------|---------|---------|
| 3510 | ENSG00000272196 | HIST2H2AA<br>4 | -1.7 | 0.0845791 | 0.1892678 | 1.502   | 0.055  | 1.440   | 1.540   | 2.581   | 0.443  | 2.219   | 3.076   |
| 3511 | ENSG00000181218 | HIST3H2A       | -1.3 | 0.0328888 | 0.0927187 | 6.785   | 0.301  | 6.492   | 7.094   | 9.085   | 0.453  | 8.563   | 9.370   |
| 3514 | ENSG00000197837 | HIST4H4        | -1.7 | 0.0567035 | 0.1395643 | 0.440   | 0.065  | 0.401   | 0.516   | 0.787   | 0.218  | 0.546   | 0.971   |
| 3517 | ENSG00000095951 | HIVEP1         | 1.1  | 0.0284083 | 0.082754  | 6.871   | 0.439  | 6.514   | 7.361   | 6.235   | 0.055  | 6.171   | 6.268   |
| 3519 | ENSG00000010818 | HIVEP2         | -1.1 | 0.0081381 | 0.031014  | 4.631   | 0.064  | 4.561   | 4.686   | 5.425   | 0.111  | 5.336   | 5.549   |
| 3520 | ENSG00000127124 | HIVEP3         | 2    | 0.005717  | 0.0234917 | 0.219   | 0.072  | 0.168   | 0.301   | 0.109   | 0.039  | 0.077   | 0.153   |
| 3521 | ENSG00000123485 | HJURP          | -1.3 | 1.146E-06 | 2.131E-05 | 64.536  | 2.323  | 62.019  | 66.597  | 82.976  | 6.956  | 75.110  | 88.313  |
| 3522 | ENSG00000156515 | HK1            | -1.1 | 3.018E-05 | 0.0003353 | 126.768 | 5.978  | 121.126 | 133.033 | 146.370 | 4.111  | 142.795 | 150.862 |
| 3523 | ENSG00000159399 | HK2            | -1.3 | 5.809E-10 | 3.004E-08 | 35.748  | 1.093  | 34.535  | 36.656  | 46.612  | 0.346  | 46.290  | 46.978  |
| 3526 | ENSG00000181666 | HKR1           | 1.1  | 0.0048836 | 0.0207786 | 16.256  | 0.739  | 15.430  | 16.854  | 14.733  | 0.894  | 13.809  | 15.595  |
| 3528 | ENSG00000234745 | HLA-B          | 1.3  | 2.749E-08 | 8.924E-07 | 45.445  | 0.507  | 44.868  | 45.817  | 34.966  | 1.303  | 33.637  | 36.242  |
| 3529 | ENSG00000204525 | HLA-C          | 1.3  | 1.031E-08 | 3.85E-07  | 145.710 | 2.334  | 143.376 | 148.044 | 118.829 | 5.252  | 115.341 | 124.868 |
| 3530 | ENSG00000204252 | HLA-DOA        | -1.2 | 0.0006229 | 0.0039994 | 31.447  | 1.120  | 30.491  | 32.679  | 37.125  | 2.940  | 33.798  | 39.373  |
| 3531 | ENSG00000224557 | HLA-DPB2       | -1.1 | 0.0174454 | 0.0566609 | 38.879  | 3.831  | 36.496  | 43.299  | 44.933  | 1.708  | 43.694  | 46.881  |
| 3533 | ENSG00000179344 | HLA-DQB1       | 1.3  | 0.0059171 | 0.0241273 | 6.791   | 0.467  | 6.302   | 7.231   | 5.534   | 0.628  | 4.814   | 5.964   |
| 3534 | ENSG00000204592 | HLA-E          | -1.3 | 2.322E-08 | 7.776E-07 | 40.202  | 2.383  | 37.546  | 42.154  | 54.460  | 3.615  | 50.643  | 57.830  |
| 3535 | ENSG00000214922 | HLA-F-AS1      | 1.4  | 0.0047345 | 0.0202874 | 2.895   | 0.127  | 2.756   | 3.005   | 2.181   | 0.205  | 1.957   | 2.358   |
| 3536 | ENSG00000206341 | HLA-H          | 1.1  | 0.0888544 | 0.1961617 | 24.535  | 1.264  | 23.391  | 25.892  | 22.099  | 2.016  | 19.824  | 23.663  |
| 3537 | ENSG00000159267 | HLCS           | 1.4  | 4.553E-07 | 9.982E-06 | 8.956   | 1.062  | 7.991   | 10.094  | 6.526   | 0.437  | 6.225   | 7.028   |
| 3538 | ENSG00000147421 | HMBOX1         | -1.1 | 0.1090948 | 0.2271476 | 6.682   | 0.579  | 6.311   | 7.349   | 7.554   | 0.844  | 6.743   | 8.427   |
| 3540 | ENSG00000183624 | HMCES          | 1.2  | 6.095E-05 | 0.0006032 | 56.794  | 1.950  | 54.591  | 58.299  | 49.068  | 2.463  | 46.234  | 50.691  |
| 3541 | ENSG00000143341 | HMCN1          | 1.1  | 0.0081822 | 0.0311469 | 8.764   | 0.098  | 8.653   | 8.837   | 8.122   | 0.440  | 7.724   | 8.595   |
| 3544 | ENSG00000148357 | HMCN2          | -1.5 | 1.065E-08 | 3.956E-07 | 2.423   | 0.265  | 2.117   | 2.583   | 3.787   | 0.328  | 3.409   | 4.002   |
| 3545 | ENSG00000064961 | HMG20B         | -1.2 | 5.077E-05 | 0.0005189 | 42.554  | 2.067  | 40.181  | 43.958  | 51.197  | 2.728  | 48.518  | 53.971  |
| 3546 | ENSG00000149948 | HMG2A          | 1.2  | 1.709E-06 | 2.961E-05 | 51.585  | 0.904  | 51.018  | 52.628  | 45.342  | 0.604  | 44.671  | 45.845  |
| 3547 | ENSG00000029993 | HMG2B3         | -1.1 | 0.0087204 | 0.0326445 | 220.181 | 1.984  | 218.480 | 222.361 | 240.620 | 8.112  | 231.610 | 247.343 |
| 3549 | ENSG00000117305 | HMGCL          | 1.1  | 0.0079717 | 0.0305102 | 13.999  | 0.468  | 13.674  | 14.535  | 12.448  | 1.393  | 11.238  | 13.971  |
| 3550 | ENSG00000113161 | HMGCR          | 1.9  | 3.41E-24  | 7.22E-21  | 215.474 | 5.376  | 211.810 | 221.645 | 116.746 | 4.886  | 111.146 | 120.137 |
| 3551 | ENSG00000112972 | HMGCS1         | 2.3  | 1.05E-28  | 5.94E-25  | 438.410 | 15.474 | 423.152 | 454.091 | 190.797 | 6.225  | 186.550 | 197.944 |
| 3552 | ENSG00000253954 | HMGN1P3<br>8   | 1.1  | 0.1176008 | 0.2394345 | 303.958 | 21.336 | 282.276 | 324.930 | 288.484 | 2.400  | 285.718 | 290.019 |
| 3553 | ENSG00000198830 | HMGN2          | 1.1  | 0.0174475 | 0.0566609 | 215.927 | 13.854 | 199.961 | 224.769 | 204.712 | 9.013  | 195.610 | 213.633 |
| 3555 | ENSG00000230330 | HMGN2P3        | 1.1  | 0.0891275 | 0.1966619 | 283.838 | 39.913 | 239.433 | 316.727 | 263.741 | 4.759  | 259.090 | 268.600 |
| 3556 | ENSG00000234664 | HMGN2P5        | 1.1  | 0.009953  | 0.0363182 | 496.768 | 37.535 | 454.497 | 526.196 | 455.159 | 21.773 | 431.442 | 474.244 |
| 3558 | ENSG00000118418 | HMGN3          | 1.1  | 0.110194  | 0.2287323 | 354.863 | 18.039 | 334.163 | 367.219 | 343.675 | 15.121 | 326.525 | 355.091 |



|      | A               | B         | C    | D         | E         | F       | G      | H       | I       | J       | K      | L       | M       |
|------|-----------------|-----------|------|-----------|-----------|---------|--------|---------|---------|---------|--------|---------|---------|
| 3559 | ENSG00000270362 | HMG3-AS1  | 1.2  | 0.1218106 | 0.2456693 | 2.396   | 0.139  | 2.307   | 2.556   | 1.984   | 0.210  | 1.752   | 2.161   |
| 3563 | ENSG00000100281 | HMGXB4    | -1.1 | 0.0243285 | 0.073437  | 27.154  | 0.246  | 26.985  | 27.435  | 29.983  | 0.445  | 29.477  | 30.315  |
| 3566 | ENSG00000072571 | HMMR      | -1.1 | 0.005702  | 0.0234413 | 89.591  | 10.253 | 81.798  | 101.206 | 104.624 | 2.358  | 102.637 | 107.230 |
| 3567 | ENSG00000100292 | HMOX1     | 1.8  | 1.96E-12  | 2.037E-10 | 24.697  | 0.165  | 24.556  | 24.879  | 14.266  | 0.746  | 13.819  | 15.127  |
| 3571 | ENSG00000103415 | HMOX2     | 1.2  | 0.001154  | 0.0065984 | 16.231  | 0.604  | 15.712  | 16.894  | 14.023  | 0.179  | 13.854  | 14.212  |
| 3572 | ENSG00000221887 | HMSD      | 1.9  | 4.713E-05 | 0.0004881 | 3.364   | 0.812  | 2.882   | 4.301   | 1.813   | 0.433  | 1.486   | 2.303   |
| 3576 | ENSG00000164749 | HNF4G     | 1.6  | 0.0033266 | 0.0153021 | 1.387   | 0.172  | 1.199   | 1.536   | 0.910   | 0.185  | 0.711   | 1.076   |
| 3579 | ENSG00000150540 | HNMT      | 1.3  | 0.0444027 | 0.1159033 | 1.517   | 0.334  | 1.180   | 1.848   | 1.167   | 0.246  | 0.912   | 1.404   |
| 3581 | ENSG00000135486 | HNRNPA1   | -1.1 | 0.0035049 | 0.0159527 | 475.733 | 3.510  | 471.682 | 477.897 | 524.517 | 4.759  | 520.096 | 529.554 |
| 3582 | ENSG00000236565 | HNRNPA3P5 | 1.1  | 0.1048737 | 0.2206679 | 216.811 | 2.653  | 213.789 | 218.759 | 208.864 | 9.010  | 202.770 | 219.213 |
| 3583 | ENSG00000197451 | HNRNPAB   | 1    | 0.1096309 | 0.2278711 | 504.353 | 7.478  | 498.449 | 512.762 | 496.175 | 13.336 | 485.238 | 511.032 |
| 3584 | ENSG00000138668 | HNRNPD    | 1.1  | 0.0070043 | 0.0275221 | 222.077 | 12.830 | 208.714 | 234.298 | 210.085 | 10.687 | 200.511 | 221.615 |
| 3586 | ENSG00000152795 | HNRNPDL   | 1.1  | 5.922E-06 | 8.56E-05  | 295.020 | 2.977  | 292.134 | 298.080 | 262.855 | 9.710  | 254.977 | 273.703 |
| 3590 | ENSG00000169045 | HNRNPH1   | -1.1 | 0.0005622 | 0.0036811 | 180.196 | 2.610  | 177.244 | 182.196 | 202.118 | 2.937  | 199.537 | 205.313 |
| 3591 | ENSG00000126945 | HNRNPH2   | 1.1  | 0.0587298 | 0.1432501 | 140.469 | 3.261  | 136.787 | 142.996 | 135.496 | 2.449  | 133.041 | 137.939 |
| 3593 | ENSG00000165119 | HNRNPK    | -1.2 | 2.931E-09 | 1.267E-07 | 457.119 | 14.840 | 447.179 | 474.177 | 559.030 | 12.518 | 550.143 | 573.346 |
| 3595 | ENSG00000250859 | HNRNPKP1  | -1.2 | 0.0150501 | 0.0505745 | 9.875   | 0.864  | 9.035   | 10.760  | 12.544  | 1.015  | 11.416  | 13.382  |
| 3598 | ENSG00000227347 | HNRNPKP2  | -1.3 | 0.0001022 | 0.0009198 | 24.629  | 0.777  | 23.902  | 25.447  | 32.672  | 2.386  | 31.111  | 35.418  |
| 3601 | ENSG00000243547 | HNRNPKP4  | -1.2 | 2.224E-05 | 0.0002603 | 75.723  | 4.275  | 72.484  | 80.569  | 93.819  | 1.721  | 91.899  | 95.223  |
| 3602 | ENSG00000104824 | HNRNPL    | -1.1 | 0.0007528 | 0.0046325 | 115.171 | 4.454  | 110.970 | 119.840 | 129.286 | 2.588  | 127.534 | 132.259 |
| 3603 | ENSG00000143889 | HNRNPLL   | 1.2  | 1.043E-05 | 0.0001378 | 32.408  | 0.847  | 31.794  | 33.374  | 27.894  | 1.353  | 26.403  | 29.046  |
| 3605 | ENSG00000099783 | HNRNPM    | 1.1  | 9.15E-05  | 0.0008418 | 154.341 | 4.460  | 149.250 | 157.560 | 139.036 | 10.201 | 127.499 | 146.862 |
| 3606 | ENSG00000125944 | HNRNPR    | 1.1  | 0.0062642 | 0.0251955 | 107.032 | 1.453  | 105.729 | 108.598 | 101.763 | 3.422  | 98.344  | 105.189 |
| 3607 | ENSG00000105323 | HNRNPUL1  | -1.1 | 0.0125086 | 0.0436112 | 121.724 | 1.290  | 120.461 | 123.038 | 133.060 | 5.097  | 128.551 | 138.591 |
| 3608 | ENSG00000152413 | HOMER1    | 1.1  | 0.0008903 | 0.0053094 | 32.431  | 1.483  | 30.769  | 33.622  | 29.377  | 1.026  | 28.743  | 30.561  |
| 3609 | ENSG00000103942 | HOMER2    | 1.2  | 0.000476  | 0.0032136 | 4.069   | 0.106  | 3.994   | 4.190   | 3.423   | 0.117  | 3.296   | 3.525   |
| 3611 | ENSG00000051128 | HOMER3    | 1.1  | 0.0673038 | 0.1591503 | 20.846  | 1.171  | 19.766  | 22.091  | 19.211  | 1.850  | 17.916  | 21.330  |
| 3612 | ENSG00000134709 | HOOK1     | 1.1  | 0.0049393 | 0.0209529 | 46.090  | 1.521  | 45.172  | 47.846  | 42.506  | 0.409  | 42.143  | 42.950  |
| 3613 | ENSG00000095066 | HOOK2     | 1.2  | 0.0001258 | 0.0010915 | 19.956  | 0.787  | 19.343  | 20.844  | 17.222  | 0.559  | 16.678  | 17.795  |
| 3614 | ENSG00000168172 | HOOK3     | 1.1  | 0.0066334 | 0.0263791 | 9.514   | 0.385  | 9.134   | 9.904   | 8.674   | 0.546  | 8.092   | 9.175   |
| 3615 | ENSG00000127483 | HP1BP3    | -1.1 | 0.0004459 | 0.003042  | 62.641  | 0.735  | 62.060  | 63.467  | 71.747  | 4.421  | 68.364  | 76.750  |
| 3616 | ENSG00000121905 | HPCA      | -1.7 | 0.0073256 | 0.028502  | 1.191   | 0.398  | 0.742   | 1.497   | 2.074   | 0.330  | 1.760   | 2.418   |

|      | A               | B             | C    | D         | E         | F        | G      | H        | I        | J        | K      | L        | M        |
|------|-----------------|---------------|------|-----------|-----------|----------|--------|----------|----------|----------|--------|----------|----------|
| 3617 | ENSG00000116983 | HPCAL4        | 1.2  | 0.0919068 | 0.2012979 | 2.280    | 0.420  | 1.994    | 2.762    | 1.899    | 0.273  | 1.614    | 2.160    |
| 3618 | ENSG00000164120 | HPGD          | 2    | 0.0042734 | 0.0187148 | 0.670    | 0.043  | 0.620    | 0.695    | 0.347    | 0.082  | 0.253    | 0.396    |
| 3620 | ENSG00000107521 | HPS1          | 1.2  | 0.0009403 | 0.0055587 | 17.311   | 0.816  | 16.391   | 17.948   | 15.053   | 0.800  | 14.198   | 15.784   |
| 3621 | ENSG00000100099 | HPS4          | -1.1 | 0.0198918 | 0.0627317 | 20.744   | 1.553  | 19.034   | 22.067   | 23.196   | 1.457  | 21.947   | 24.796   |
| 3622 | ENSG00000110756 | HPS5          | 1.1  | 0.0095665 | 0.0351507 | 13.279   | 0.863  | 12.287   | 13.849   | 11.977   | 0.814  | 11.226   | 12.841   |
| 3623 | ENSG00000127252 | HRASLS        | 1.3  | 0.1160338 | 0.2371003 | 4.394    | 0.542  | 3.791    | 4.843    | 3.486    | 1.303  | 2.258    | 4.854    |
| 3624 | ENSG00000168004 | HRASLS5       | 1.5  | 5.974E-08 | 1.733E-06 | 12.962   | 0.607  | 12.515   | 13.653   | 8.618    | 0.577  | 8.069    | 9.219    |
| 3625 | ENSG00000130528 | HRC           | -1.4 | 2.285E-06 | 3.796E-05 | 10.834   | 0.906  | 9.953    | 11.763   | 15.817   | 0.412  | 15.352   | 16.137   |
| 3626 | ENSG00000113749 | HRH2          | 1.1  | 0.0851422 | 0.190031  | 5.852    | 0.421  | 5.408    | 6.244    | 5.360    | 0.024  | 5.333    | 5.378    |
| 3627 | ENSG00000135116 | HRK           | 2.6  | 1.37E-11  | 1.115E-09 | 3.112    | 0.100  | 3.000    | 3.191    | 1.229    | 0.180  | 1.110    | 1.437    |
| 3628 | ENSG00000122254 | HS3ST2        | 1.9  | 0.0049691 | 0.021042  | 1.345    | 0.408  | 1.077    | 1.815    | 0.737    | 0.225  | 0.480    | 0.897    |
| 3629 | ENSG00000125430 | HS3ST3B1      | -1.3 | 0.0016801 | 0.0088939 | 3.137    | 0.133  | 2.984    | 3.232    | 4.269    | 0.321  | 3.906    | 4.517    |
| 3632 | ENSG00000249853 | HS3ST5        | -1.6 | 0.0002872 | 0.0021358 | 1.491    | 0.336  | 1.234    | 1.871    | 2.505    | 0.255  | 2.237    | 2.744    |
| 3633 | ENSG00000136720 | HS6ST1        | -1.2 | 1.498E-05 | 0.000186  | 37.852   | 0.809  | 37.022   | 38.637   | 45.556   | 2.506  | 43.111   | 48.120   |
| 3637 | ENSG00000171004 | HS6ST2        | -1.2 | 0.0002777 | 0.0020804 | 13.812   | 1.131  | 12.515   | 14.595   | 17.213   | 1.019  | 16.040   | 17.883   |
| 3639 | ENSG00000185352 | HS6ST3        | -1.6 | 0.0026344 | 0.0127158 | 0.741    | 0.231  | 0.511    | 0.973    | 1.175    | 0.215  | 1.035    | 1.423    |
| 3641 | ENSG00000167733 | HSD11B1L      | -1.2 | 0.0449115 | 0.1169676 | 5.330    | 0.528  | 4.732    | 5.730    | 6.476    | 0.736  | 5.971    | 7.321    |
| 3642 | ENSG00000149084 | HSD17B12      | 1.4  | 4.78E-14  | 7.28E-12  | 62.357   | 0.271  | 62.061   | 62.593   | 45.398   | 1.402  | 44.198   | 46.938   |
| 3644 | ENSG00000087076 | HSD17B14      | 1.6  | 2.41E-08  | 7.976E-07 | 42.049   | 0.475  | 41.520   | 42.442   | 27.711   | 1.055  | 26.494   | 28.369   |
| 3645 | ENSG00000132196 | HSD17B7       | 1.3  | 1.648E-07 | 4.218E-06 | 19.928   | 0.768  | 19.183   | 20.717   | 15.326   | 0.861  | 14.385   | 16.073   |
| 3646 | ENSG00000099251 | HSD17B7P<br>2 | 1.6  | 0.0075888 | 0.0293503 | 3.403    | 0.322  | 3.067    | 3.709    | 2.217    | 0.327  | 1.856    | 2.493    |
| 3648 | ENSG00000099377 | HSD3B7        | 1.3  | 0.0432787 | 0.1135897 | 4.847    | 0.458  | 4.359    | 5.267    | 3.898    | 0.228  | 3.636    | 4.046    |
| 3649 | ENSG00000185122 | HSF1          | -1.3 | 1.014E-06 | 1.925E-05 | 18.227   | 0.531  | 17.722   | 18.781   | 23.608   | 1.391  | 22.421   | 25.138   |
| 3650 | ENSG00000025156 | HSF2          | -1.2 | 0.0001541 | 0.0012861 | 25.484   | 1.697  | 23.539   | 26.666   | 32.178   | 2.918  | 30.099   | 35.514   |
| 3654 | ENSG00000080824 | HSP90AA1      | -1.2 | 7.957E-10 | 4.029E-08 | 1159.523 | 4.706  | 1155.179 | 1164.522 | 1411.077 | 27.853 | 1379.397 | 1431.720 |
| 3655 | ENSG00000224411 | HSP90AA2<br>P | -1.2 | 3.022E-05 | 0.0003355 | 124.504  | 2.395  | 121.805  | 126.377  | 149.297  | 9.531  | 141.395  | 159.882  |
| 3657 | ENSG00000096384 | HSP90AB1      | -1.1 | 0.0003984 | 0.0027892 | 3115.278 | 61.426 | 3052.435 | 3175.182 | 3451.039 | 20.787 | 3437.497 | 3474.973 |
| 3659 | ENSG00000166598 | HSP90B1       | 1.1  | 0.000242  | 0.0018606 | 762.454  | 15.480 | 746.770  | 777.721  | 711.892  | 12.053 | 698.032  | 719.924  |
| 3660 | ENSG00000155304 | HSPA13        | 1.1  | 0.0055342 | 0.0228681 | 41.612   | 1.547  | 40.461   | 43.371   | 38.056   | 3.217  | 35.807   | 41.742   |
| 3663 | ENSG00000187522 | HSPA14        | 1.3  | 1.826E-07 | 4.637E-06 | 28.263   | 1.715  | 26.519   | 29.948   | 21.959   | 1.187  | 21.021   | 23.293   |
| 3664 | ENSG00000204389 | HSPA1A        | 1.3  | 9.311E-07 | 1.8E-05   | 56.981   | 2.696  | 54.146   | 59.512   | 45.759   | 2.981  | 42.981   | 48.909   |
| 3665 | ENSG00000204388 | HSPA1B        | 1.2  | 2.979E-05 | 0.0003319 | 60.816   | 3.113  | 57.419   | 63.533   | 50.787   | 2.965  | 47.504   | 53.269   |
| 3666 | ENSG00000126803 | HSPA2         | -1.2 | 0.0001246 | 0.001082  | 26.568   | 2.385  | 23.871   | 28.394   | 32.086   | 1.249  | 30.679   | 33.065   |
| 3667 | ENSG00000170606 | HSPA4         | -1   | 0.0472146 | 0.1215763 | 351.959  | 1.382  | 350.384  | 352.966  | 376.620  | 10.186 | 364.937  | 383.637  |
| 3668 | ENSG00000044574 | HSPA5         | 1.4  | 9.75E-14  | 1.37E-11  | 401.426  | 24.336 | 375.506  | 423.786  | 294.527  | 9.682  | 284.742  | 304.102  |

|      | A               | B       | C    | D         | E         | F       | G      | H       | I       | J       | K      | L       | M       |
|------|-----------------|---------|------|-----------|-----------|---------|--------|---------|---------|---------|--------|---------|---------|
| 3669 | ENSG00000109971 | HSPA8   | -1.1 | 3.21E-05  | 0.0003532 | 835.745 | 28.166 | 804.547 | 859.302 | 953.303 | 18.489 | 931.955 | 964.025 |
| 3670 | ENSG00000234176 | HSPA8P1 | -1.2 | 0.0771377 | 0.1763014 | 6.429   | 1.310  | 5.188   | 7.799   | 7.968   | 0.541  | 7.343   | 8.305   |
| 3673 | ENSG00000229091 | HSPA8P8 | -1.2 | 0.0923336 | 0.2018924 | 5.714   | 0.779  | 4.897   | 6.449   | 6.879   | 0.746  | 6.058   | 7.516   |
| 3674 | ENSG00000113013 | HSPA9   | 1.1  | 0.0103078 | 0.0373914 | 333.554 | 10.259 | 322.007 | 341.619 | 320.122 | 5.352  | 314.276 | 324.781 |
| 3675 | ENSG00000226666 | HSPA9P1 | 1.2  | 0.0117833 | 0.0416231 | 13.016  | 0.941  | 12.226  | 14.056  | 11.019  | 0.374  | 10.754  | 11.447  |
| 3677 | ENSG00000106211 | HSPB1   | -1.2 | 0.000195  | 0.0015633 | 92.747  | 1.148  | 91.501  | 93.761  | 112.933 | 7.843  | 106.954 | 121.814 |
| 3678 | ENSG00000081870 | HSPB11  | 1.1  | 0.0180851 | 0.0583284 | 23.789  | 1.174  | 22.448  | 24.631  | 21.653  | 1.677  | 19.912  | 23.259  |
| 3679 | ENSG00000236060 | HSPB1P1 | -1.3 | 0.0475087 | 0.1220776 | 20.709  | 2.797  | 17.879  | 23.471  | 28.539  | 6.967  | 21.487  | 35.418  |
| 3680 | ENSG00000152137 | HSPB8   | -1.2 | 0.0239952 | 0.0726353 | 12.514  | 2.357  | 10.435  | 15.074  | 15.083  | 1.002  | 13.955  | 15.872  |
| 3682 | ENSG00000144381 | HSPD1   | -1.1 | 0.0105692 | 0.0381227 | 744.557 | 23.436 | 725.044 | 770.552 | 808.880 | 2.929  | 806.536 | 812.163 |
| 3683 | ENSG00000213430 | HSPD1P1 | -1.1 | 0.1084726 | 0.226217  | 172.859 | 3.420  | 170.044 | 176.665 | 185.603 | 1.964  | 183.545 | 187.457 |
| 3684 | ENSG00000142798 | HSPG2   | 1.1  | 0.0453698 | 0.1179251 | 35.840  | 1.228  | 34.423  | 36.592  | 33.620  | 3.686  | 30.954  | 37.826  |
| 3686 | ENSG00000109854 | HTATIP2 | 1.2  | 0.0007607 | 0.0046684 | 40.773  | 1.687  | 39.470  | 42.679  | 35.723  | 1.808  | 34.036  | 37.632  |
| 3687 | ENSG00000178394 | HTR1A   | 1.7  | 0.0146942 | 0.0496252 | 1.818   | 0.240  | 1.556   | 2.029   | 1.100   | 0.399  | 0.642   | 1.376   |
| 3691 | ENSG00000179546 | HTR1D   | -2.3 | 2.793E-09 | 1.214E-07 | 2.613   | 0.326  | 2.239   | 2.838   | 6.182   | 0.768  | 5.298   | 6.683   |
| 3692 | ENSG00000147246 | HTR2C   | -1.3 | 0.0006667 | 0.0042123 | 4.190   | 0.495  | 3.846   | 4.757   | 5.707   | 0.541  | 5.196   | 6.273   |
| 3693 | ENSG00000148680 | HTR7    | 1.5  | 4.032E-06 | 6.155E-05 | 55.436  | 4.656  | 52.556  | 60.807  | 38.074  | 5.702  | 31.571  | 42.215  |
| 3694 | ENSG00000183935 | HTR7P1  | 1.3  | 0.0479445 | 0.1229631 | 2.131   | 0.441  | 1.655   | 2.527   | 1.706   | 0.188  | 1.489   | 1.816   |
| 3696 | ENSG00000197386 | HTT     | -1.1 | 0.01093   | 0.0391734 | 22.921  | 0.858  | 22.316  | 23.903  | 25.294  | 1.266  | 24.501  | 26.754  |
| 3699 | ENSG00000086758 | HUWE1   | -1.1 | 0.000137  | 0.0011659 | 86.996  | 2.198  | 84.467  | 88.440  | 98.717  | 4.402  | 95.437  | 103.720 |
| 3700 | ENSG00000122986 | HVCN1   | 1.2  | 0.0347965 | 0.0965105 | 6.628   | 0.331  | 6.245   | 6.827   | 5.758   | 0.195  | 5.611   | 5.979   |
| 3702 | ENSG00000068001 | HYAL2   | -1.1 | 0.0928691 | 0.2025032 | 19.490  | 0.691  | 18.711  | 20.029  | 21.617  | 0.671  | 20.856  | 22.126  |
| 3703 | ENSG00000178922 | HYI     | -1.2 | 0.0426509 | 0.1122556 | 10.096  | 1.749  | 8.304   | 11.799  | 12.095  | 0.110  | 11.999  | 12.215  |
| 3705 | ENSG00000242028 | HYPK    | -1.5 | 0.0006341 | 0.0040556 | 1.598   | 0.115  | 1.468   | 1.686   | 2.406   | 0.176  | 2.245   | 2.593   |
| 3706 | ENSG00000134330 | IAH1    | 1.3  | 4.156E-05 | 0.0004401 | 7.806   | 0.228  | 7.672   | 8.070   | 5.987   | 0.772  | 5.169   | 6.703   |
| 3710 | ENSG00000196305 | IARS    | 1.2  | 4.934E-08 | 1.477E-06 | 169.328 | 3.429  | 165.653 | 172.443 | 147.222 | 4.545  | 144.496 | 152.468 |
| 3711 | ENSG00000003147 | ICA1    | 1.1  | 0.0329355 | 0.0927777 | 19.987  | 1.512  | 18.577  | 21.584  | 18.505  | 1.424  | 16.956  | 19.756  |
| 3712 | ENSG00000163596 | ICA1L   | 2    | 3.899E-10 | 2.141E-08 | 2.427   | 0.082  | 2.354   | 2.516   | 1.236   | 0.075  | 1.150   | 1.284   |
| 3713 | ENSG00000105376 | ICAM5   | -1.2 | 0.0908512 | 0.1998004 | 2.909   | 0.470  | 2.457   | 3.395   | 3.562   | 0.218  | 3.380   | 3.804   |
| 3715 | ENSG00000164151 | ICE1    | -1.3 | 2.239E-09 | 1.01E-07  | 40.811  | 1.999  | 39.143  | 43.028  | 52.823  | 2.699  | 49.965  | 55.329  |
| 3716 | ENSG00000128915 | ICE2    | -1.1 | 0.0167895 | 0.0551166 | 21.475  | 0.434  | 20.975  | 21.760  | 23.612  | 1.260  | 22.456  | 24.955  |
| 3718 | ENSG00000116237 | ICMT    | 1.1  | 0.0095827 | 0.0352023 | 89.930  | 2.635  | 87.024  | 92.165  | 85.243  | 2.020  | 83.274  | 87.309  |
| 3719 | ENSG00000160223 | ICOSLG  | 1.2  | 0.1017849 | 0.2159147 | 1.955   | 0.138  | 1.803   | 2.072   | 1.713   | 0.115  | 1.612   | 1.838   |
| 3720 | ENSG00000117318 | ID3     | 1.2  | 1.997E-05 | 0.0002376 | 141.044 | 5.948  | 135.388 | 147.246 | 122.689 | 7.210  | 117.387 | 130.898 |
| 3721 | ENSG00000172201 | ID4     | 1.8  | 1.40E-12  | 1.506E-10 | 45.810  | 3.767  | 43.084  | 50.108  | 26.478  | 3.163  | 22.854  | 28.688  |
| 3722 | ENSG00000138413 | IDH1    | 1.4  | 2.84E-16  | 7.26E-14  | 272.936 | 3.300  | 269.174 | 275.337 | 202.111 | 1.171  | 201.094 | 203.392 |
| 3723 | ENSG00000166411 | IDH3A   | 1.2  | 0.000548  | 0.0036019 | 13.359  | 1.014  | 12.212  | 14.133  | 11.528  | 0.193  | 11.400  | 11.750  |
| 3724 | ENSG00000067829 | IDH3G   | -1.1 | 0.0604665 | 0.1465252 | 22.211  | 2.586  | 19.249  | 24.017  | 25.137  | 0.624  | 24.637  | 25.836  |
| 3725 | ENSG00000067064 | IDI1    | 1.7  | 5.91E-20  | 3.70E-17  | 96.135  | 1.631  | 94.273  | 97.312  | 57.380  | 0.678  | 56.815  | 58.132  |
| 3726 | ENSG00000131203 | IDO1    | -1.3 | 4.346E-07 | 9.584E-06 | 40.306  | 3.920  | 36.221  | 44.036  | 54.907  | 3.138  | 51.557  | 57.778  |
| 3728 | ENSG00000010404 | IDS     | 1.1  | 0.0016605 | 0.008812  | 17.284  | 0.529  | 16.684  | 17.685  | 15.419  | 1.140  | 14.106  | 16.158  |
| 3729 | ENSG00000160888 | IER2    | 1.1  | 0.0174696 | 0.0566998 | 115.222 | 2.072  | 112.903 | 116.888 | 107.581 | 11.784 | 96.481  | 119.947 |
| 3730 | ENSG00000137331 | IER3    | 1.7  | 3.652E-10 | 2.025E-08 | 44.477  | 5.323  | 38.565  | 48.888  | 27.258  | 3.424  | 23.478  | 30.153  |

|      | A               | B       | C    | D         | E         | F       | G      | H       | I       | J       | K      | L       | M       |
|------|-----------------|---------|------|-----------|-----------|---------|--------|---------|---------|---------|--------|---------|---------|
| 3731 | ENSG00000162783 | IER5    | -1.1 | 0.0917216 | 0.2010222 | 17.905  | 1.100  | 17.040  | 19.143  | 20.030  | 2.204  | 17.503  | 21.548  |
| 3732 | ENSG00000188483 | IER5L   | 1.7  | 0.0014884 | 0.0080362 | 2.257   | 0.541  | 1.759   | 2.832   | 1.348   | 0.196  | 1.170   | 1.558   |
| 3733 | ENSG00000169991 | IFFO2   | 1.2  | 0.0246773 | 0.0741987 | 6.981   | 0.509  | 6.669   | 7.568   | 6.192   | 0.587  | 5.529   | 6.647   |
| 3734 | ENSG00000163565 | IFI16   | -2.2 | 6.808E-06 | 9.605E-05 | 0.663   | 0.185  | 0.474   | 0.844   | 1.529   | 0.188  | 1.329   | 1.702   |
| 3737 | ENSG00000068079 | IFI35   | 1.4  | 0.0109389 | 0.0391969 | 4.205   | 0.360  | 3.819   | 4.531   | 3.023   | 0.437  | 2.519   | 3.299   |
| 3738 | ENSG00000152778 | IFIT5   | 1.3  | 0.003149  | 0.014664  | 4.833   | 0.563  | 4.339   | 5.446   | 3.683   | 0.464  | 3.367   | 4.216   |
| 3741 | ENSG00000185201 | IFITM2  | -1.1 | 0.0001287 | 0.001111  | 158.823 | 5.476  | 152.508 | 162.268 | 184.066 | 2.488  | 181.509 | 186.480 |
| 3742 | ENSG00000142089 | IFITM3  | 1.1  | 0.0459555 | 0.119045  | 189.816 | 10.835 | 179.494 | 201.100 | 181.032 | 1.488  | 179.676 | 182.623 |
| 3745 | ENSG00000006652 | IFRD1   | 1.8  | 2.01E-17  | 7.24E-15  | 25.025  | 1.740  | 23.417  | 26.871  | 13.966  | 0.608  | 13.326  | 14.537  |
| 3747 | ENSG00000138002 | IFT172  | 1.2  | 0.0054361 | 0.0225344 | 4.995   | 0.091  | 4.938   | 5.100   | 4.301   | 0.319  | 3.947   | 4.566   |
| 3748 | ENSG00000100360 | IFT27   | -1.1 | 0.0061764 | 0.0249251 | 10.911  | 0.279  | 10.699  | 11.227  | 12.727  | 0.927  | 11.867  | 13.709  |
| 3750 | ENSG00000101052 | IFT52   | 1.1  | 0.0750536 | 0.1725406 | 41.942  | 2.985  | 38.683  | 44.543  | 39.555  | 1.932  | 37.684  | 41.544  |
| 3751 | ENSG00000114446 | IFT57   | 1.2  | 0.0001373 | 0.0011683 | 24.578  | 1.017  | 23.420  | 25.326  | 21.010  | 0.408  | 20.695  | 21.471  |
| 3753 | ENSG00000096872 | IFT74   | 1.2  | 0.0030502 | 0.0142942 | 24.640  | 0.253  | 24.401  | 24.905  | 21.650  | 0.645  | 20.909  | 22.085  |
| 3756 | ENSG00000032742 | IFT88   | 1.2  | 0.097907  | 0.2100598 | 3.200   | 0.063  | 3.143   | 3.267   | 2.828   | 0.118  | 2.713   | 2.949   |
| 3758 | ENSG00000174498 | IGDCC3  | 1.1  | 0.0028006 | 0.0133463 | 45.932  | 1.954  | 43.960  | 47.868  | 41.735  | 0.835  | 40.850  | 42.508  |
| 3759 | ENSG00000140443 | IGF1R   | -1.1 | 0.0489403 | 0.1250391 | 29.719  | 1.217  | 28.329  | 30.589  | 32.129  | 0.770  | 31.442  | 32.961  |
| 3761 | ENSG00000073792 | IGF2BP2 | 1    | 0.1160859 | 0.2371781 | 101.365 | 2.458  | 99.790  | 104.198 | 99.369  | 1.130  | 98.480  | 100.641 |
| 3762 | ENSG00000136231 | IGF2BP3 | 1.1  | 0.0003191 | 0.0023205 | 163.599 | 10.082 | 152.065 | 170.738 | 148.455 | 7.504  | 142.908 | 156.993 |
| 3763 | ENSG00000197081 | IGF2R   | 1.3  | 9.84E-11  | 6.35E-09  | 43.583  | 3.639  | 40.656  | 47.657  | 33.126  | 0.483  | 32.569  | 33.443  |
| 3764 | ENSG00000115457 | IGFBP2  | -1.3 | 6.729E-05 | 0.0006545 | 79.486  | 2.843  | 76.210  | 81.302  | 103.873 | 10.034 | 92.528  | 111.582 |
| 3765 | ENSG00000146674 | IGFBP3  | 1.3  | 0.0039625 | 0.0176409 | 5.564   | 0.369  | 5.168   | 5.899   | 4.507   | 0.294  | 4.243   | 4.824   |
| 3766 | ENSG00000141753 | IGFBP4  | -1.2 | 0.0001952 | 0.0015633 | 80.680  | 1.631  | 79.175  | 82.413  | 95.660  | 8.770  | 90.347  | 105.783 |
| 3768 | ENSG00000115461 | IGFBP5  | -1.6 | 1.955E-05 | 0.0002331 | 1.856   | 0.354  | 1.490   | 2.197   | 2.982   | 0.312  | 2.719   | 3.327   |
| 3769 | ENSG00000163453 | IGFBP7  | 2.4  | 0.0016539 | 0.00878   | 1.229   | 0.432  | 0.765   | 1.621   | 0.525   | 0.070  | 0.483   | 0.605   |
| 3771 | ENSG00000137142 | IGFBPL1 | -1.2 | 0.0007991 | 0.0048616 | 55.501  | 3.380  | 51.601  | 57.590  | 68.829  | 3.628  | 64.649  | 71.152  |
| 3772 | ENSG00000132740 | IGHMBP2 | -1.1 | 0.03942   | 0.1057768 | 5.445   | 0.033  | 5.416   | 5.481   | 6.332   | 0.411  | 5.860   | 6.606   |
| 3773 | ENSG00000147255 | IGSF1   | -1.2 | 9.453E-07 | 1.823E-05 | 22.959  | 1.188  | 21.613  | 23.860  | 28.911  | 1.368  | 27.361  | 29.950  |
| 3774 | ENSG00000117154 | IGSF21  | -1.2 | 0.0216736 | 0.067149  | 8.035   | 0.572  | 7.375   | 8.375   | 9.849   | 0.799  | 9.112   | 10.697  |
| 3776 | ENSG00000162729 | IGSF8   | -1.2 | 8.118E-05 | 0.0007611 | 51.769  | 4.291  | 48.133  | 56.502  | 62.610  | 2.711  | 59.814  | 65.227  |
| 3777 | ENSG00000085552 | IGSF9   | -1.1 | 0.0230311 | 0.0704283 | 6.257   | 0.392  | 5.859   | 6.642   | 7.348   | 0.079  | 7.277   | 7.433   |
| 3778 | ENSG00000113141 | IK      | -1.1 | 0.0013981 | 0.0076477 | 42.093  | 0.506  | 41.778  | 42.676  | 48.450  | 0.704  | 47.671  | 49.039  |
| 3780 | ENSG00000166130 | IKBIP   | 1.2  | 0.0045638 | 0.0197107 | 14.834  | 1.234  | 13.743  | 16.172  | 12.893  | 1.354  | 11.490  | 14.191  |
| 3781 | ENSG00000104365 | IKBKB   | -1.1 | 0.0143044 | 0.0486585 | 9.530   | 0.492  | 9.235   | 10.098  | 10.795  | 0.485  | 10.448  | 11.349  |
| 3783 | ENSG00000185811 | IKZF1   | 1.3  | 0.0985232 | 0.2110339 | 0.631   | 0.135  | 0.533   | 0.785   | 0.508   | 0.107  | 0.444   | 0.631   |
| 3784 | ENSG00000030419 | IKZF2   | -1.1 | 0.0682634 | 0.1607321 | 2.703   | 0.292  | 2.378   | 2.943   | 3.159   | 0.321  | 2.791   | 3.386   |
| 3786 | ENSG00000123411 | IKZF4   | -1.2 | 0.00066   | 0.0041836 | 7.802   | 0.532  | 7.287   | 8.349   | 9.626   | 0.419  | 9.168   | 9.991   |
| 3790 | ENSG00000095752 | IL11    | -1.2 | 0.0848919 | 0.1897246 | 3.786   | 1.184  | 2.677   | 5.033   | 4.740   | 0.287  | 4.509   | 5.061   |
| 3791 | ENSG00000081985 | IL12RB2 | 1.4  | 0.013605  | 0.0466643 | 1.621   | 0.100  | 1.513   | 1.710   | 1.165   | 0.093  | 1.064   | 1.247   |
| 3792 | ENSG00000131724 | IL13RA1 | 1.4  | 7.006E-07 | 1.424E-05 | 14.001  | 0.793  | 13.086  | 14.463  | 10.428  | 0.877  | 9.543   | 11.296  |
| 3793 | ENSG00000124391 | IL17C   | -3.2 | 0.0564466 | 0.1391867 | 0.143   | 0.247  | 0.000   | 0.428   | 0.498   | 0.164  | 0.363   | 0.680   |
| 3795 | ENSG00000177663 | IL17RA  | 1.3  | 0.0001843 | 0.0014955 | 3.650   | 0.167  | 3.546   | 3.842   | 2.827   | 0.329  | 2.567   | 3.197   |
| 3796 | ENSG00000144730 | IL17RD  | 1.1  | 0.017088  | 0.0557935 | 25.450  | 2.483  | 23.611  | 28.275  | 23.531  | 1.754  | 22.468  | 25.555  |

|      | A               | B        | C    | D         | E         | F       | G     | H       | I       | J       | K      | L       | M       |
|------|-----------------|----------|------|-----------|-----------|---------|-------|---------|---------|---------|--------|---------|---------|
| 3797 | ENSG00000137496 | IL18BP   | -1.2 | 0.0306852 | 0.087799  | 4.271   | 0.297 | 4.098   | 4.614   | 5.217   | 0.272  | 4.993   | 5.520   |
| 3798 | ENSG00000016402 | IL20RA   | 1.6  | 0.0006196 | 0.0039847 | 2.338   | 0.126 | 2.216   | 2.468   | 1.510   | 0.371  | 1.270   | 1.937   |
| 3801 | ENSG00000174564 | IL20RB   | 1.6  | 0.0001995 | 0.0015942 | 5.243   | 0.842 | 4.301   | 5.924   | 3.370   | 0.572  | 2.972   | 4.026   |
| 3803 | ENSG00000103522 | IL21R    | 4.6  | 1.622E-06 | 2.834E-05 | 0.542   | 0.153 | 0.378   | 0.681   | 0.117   | 0.028  | 0.086   | 0.142   |
| 3804 | ENSG00000110944 | IL23A    | 1.4  | 0.090198  | 0.1985836 | 3.077   | 0.371 | 2.761   | 3.485   | 2.235   | 0.232  | 2.093   | 2.503   |
| 3806 | ENSG00000104998 | IL27RA   | 1.4  | 1.079E-07 | 2.91E-06  | 22.434  | 0.924 | 21.427  | 23.243  | 16.102  | 1.061  | 15.100  | 17.213  |
| 3807 | ENSG00000008517 | IL32     | 1.4  | 0.063851  | 0.1527674 | 1.816   | 0.058 | 1.749   | 1.857   | 1.342   | 0.272  | 1.065   | 1.608   |
| 3810 | ENSG00000077238 | IL4R     | 1.2  | 0.000194  | 0.0015576 | 10.647  | 0.517 | 10.120  | 11.154  | 8.788   | 0.897  | 7.956   | 9.738   |
| 3812 | ENSG00000160712 | IL6R     | 2.2  | 7.73E-08  | 2.164E-06 | 2.816   | 0.557 | 2.196   | 3.274   | 1.299   | 0.242  | 1.155   | 1.578   |
| 3813 | ENSG00000134352 | IL6ST    | 1.2  | 0.0012642 | 0.0070869 | 5.724   | 0.433 | 5.299   | 6.165   | 4.789   | 0.291  | 4.500   | 5.081   |
| 3814 | ENSG00000143195 | ILD2R    | 1.3  | 0.0006769 | 0.0042642 | 2.714   | 0.095 | 2.607   | 2.790   | 2.162   | 0.153  | 2.013   | 2.320   |
| 3815 | ENSG00000143621 | ILF2     | -1.1 | 0.0064315 | 0.0257212 | 443.721 | 5.718 | 438.856 | 450.020 | 485.475 | 10.576 | 473.379 | 492.979 |
| 3816 | ENSG00000267100 | ILF3-AS1 | -1.1 | 0.0825823 | 0.1860054 | 30.343  | 2.453 | 27.573  | 32.239  | 34.224  | 1.598  | 33.049  | 36.044  |
| 3819 | ENSG00000166333 | ILK      | 1.1  | 0.0050481 | 0.0212914 | 66.837  | 2.329 | 64.160  | 68.400  | 61.982  | 1.790  | 60.164  | 63.742  |
| 3821 | ENSG00000177971 | IMP3     | -1.1 | 0.0206362 | 0.0646556 | 39.299  | 2.900 | 36.941  | 42.538  | 44.293  | 1.361  | 42.745  | 45.304  |
| 3822 | ENSG00000141401 | IMPA2    | -1.1 | 0.0444221 | 0.1159033 | 26.382  | 0.730 | 25.551  | 26.921  | 29.216  | 0.737  | 28.491  | 29.964  |
| 3823 | ENSG00000154059 | IMPACT   | 1.1  | 0.0016007 | 0.008532  | 43.852  | 0.511 | 43.321  | 44.340  | 39.748  | 3.323  | 35.936  | 42.030  |
| 3824 | ENSG00000106348 | IMPDH1   | 1.1  | 0.0084294 | 0.0317916 | 22.544  | 0.843 | 21.953  | 23.508  | 20.302  | 1.245  | 19.300  | 21.696  |
| 3826 | ENSG00000178035 | IMPDH2   | -1.1 | 3.594E-05 | 0.0003882 | 381.129 | 8.735 | 373.027 | 390.383 | 434.972 | 4.439  | 429.944 | 438.346 |
| 3828 | ENSG00000148798 | INA      | 1.2  | 0.0006324 | 0.0040527 | 16.565  | 0.795 | 15.684  | 17.228  | 14.036  | 0.489  | 13.603  | 14.566  |
| 3829 | ENSG00000257704 | INAFM1   | 1.3  | 0.0373894 | 0.1015687 | 6.257   | 0.737 | 5.412   | 6.767   | 4.719   | 0.947  | 3.723   | 5.608   |
| 3830 | ENSG00000149503 | INCENP   | -1.4 | 9.75E-11  | 6.321E-09 | 47.328  | 2.763 | 45.151  | 50.436  | 67.428  | 6.293  | 60.203  | 71.713  |
| 3831 | ENSG00000203485 | INF2     | -1.1 | 0.0046188 | 0.0198824 | 10.669  | 0.462 | 10.333  | 11.196  | 12.442  | 0.783  | 11.670  | 13.237  |
| 3833 | ENSG00000153487 | ING1     | 1.1  | 0.1132901 | 0.2330425 | 10.957  | 0.924 | 10.122  | 11.949  | 10.311  | 0.450  | 9.797   | 10.633  |
| 3834 | ENSG00000111653 | ING4     | -1.1 | 0.0953091 | 0.2063193 | 21.341  | 3.162 | 19.007  | 24.940  | 24.048  | 1.775  | 22.020  | 25.316  |
| 3836 | ENSG00000139269 | INHBE    | 3.1  | 2.14E-18  | 9.77E-16  | 14.299  | 1.221 | 12.928  | 15.269  | 4.687   | 0.147  | 4.533   | 4.824   |
| 3837 | ENSG00000241644 | INMT     | -1.4 | 0.0079546 | 0.0304657 | 2.150   | 0.236 | 1.881   | 2.319   | 3.075   | 0.366  | 2.719   | 3.450   |
| 3838 | ENSG00000128908 | INO80    | 1.1  | 0.0593095 | 0.1443934 | 14.872  | 0.731 | 14.125  | 15.587  | 14.002  | 0.460  | 13.657  | 14.525  |
| 3842 | ENSG00000153391 | INO80C   | -1.1 | 0.0235697 | 0.071671  | 8.641   | 0.398 | 8.350   | 9.094   | 10.089  | 0.667  | 9.529   | 10.826  |
| 3844 | ENSG00000114933 | INO80D   | 1.1  | 0.1104149 | 0.2290912 | 10.958  | 0.697 | 10.252  | 11.646  | 10.467  | 0.999  | 9.325   | 11.183  |
| 3845 | ENSG00000169592 | INO80E   | 1.1  | 0.1051802 | 0.221096  | 18.498  | 0.847 | 17.812  | 19.445  | 17.642  | 1.394  | 16.040  | 18.585  |
| 3847 | ENSG00000151689 | INPP1    | 1.6  | 4.066E-05 | 0.0004317 | 4.298   | 0.143 | 4.140   | 4.418   | 2.779   | 0.360  | 2.366   | 3.021   |
| 3848 | ENSG00000040933 | INPP4A   | 1    | 0.1221844 | 0.2462779 | 16.773  | 0.262 | 16.597  | 17.074  | 16.336  | 0.419  | 15.899  | 16.735  |
| 3849 | ENSG00000068383 | INPP5A   | -1.2 | 0.0061423 | 0.0248231 | 11.259  | 0.727 | 10.438  | 11.819  | 13.586  | 1.286  | 12.744  | 15.066  |
| 3850 | ENSG00000204084 | INPP5B   | 1.1  | 0.0181145 | 0.058389  | 12.397  | 0.877 | 11.392  | 13.004  | 11.403  | 0.398  | 11.138  | 11.860  |
| 3851 | ENSG00000148384 | INPP5E   | -1.4 | 2.449E-06 | 4.042E-05 | 7.106   | 0.655 | 6.397   | 7.689   | 10.130  | 0.998  | 9.284   | 11.230  |
| 3852 | ENSG00000198825 | INPP5F   | 1.1  | 0.0012045 | 0.0068293 | 25.409  | 0.687 | 24.619  | 25.858  | 22.904  | 0.902  | 22.315  | 23.942  |
| 3853 | ENSG00000186480 | INSIG1   | 1.8  | 8.94E-19  | 4.73E-16  | 72.893  | 2.915 | 71.186  | 76.258  | 40.974  | 3.053  | 37.612  | 43.573  |
| 3854 | ENSG00000164880 | INTS1    | -1.1 | 0.0039606 | 0.0176376 | 36.129  | 0.167 | 35.997  | 36.317  | 40.632  | 2.766  | 38.868  | 43.820  |
| 3855 | ENSG00000104613 | INTS10   | -1.1 | 0.0014377 | 0.0078211 | 18.479  | 0.520 | 18.141  | 19.078  | 21.580  | 1.829  | 19.511  | 22.984  |
| 3856 | ENSG00000127054 | INTS11   | -1.2 | 0.0003012 | 0.0022173 | 19.502  | 0.560 | 19.070  | 20.135  | 22.975  | 1.218  | 21.730  | 24.164  |
| 3857 | ENSG00000064102 | INTS13   | -1.3 | 5.44E-09  | 2.217E-07 | 55.721  | 1.890 | 53.663  | 57.381  | 72.095  | 2.005  | 69.780  | 73.313  |
| 3858 | ENSG00000138614 | INTS14   | 1.1  | 0.002886  | 0.0136345 | 32.356  | 0.303 | 32.168  | 32.706  | 29.167  | 1.817  | 27.352  | 30.986  |

|      | A               | B      | C    | D         | E         | F       | G     | H       | I       | J       | K     | L       | M       |
|------|-----------------|--------|------|-----------|-----------|---------|-------|---------|---------|---------|-------|---------|---------|
| 3860 | ENSG00000185085 | INTS5  | -1.1 | 0.043136  | 0.1132856 | 10.973  | 0.630 | 10.247  | 11.384  | 12.712  | 1.444 | 11.819  | 14.378  |
| 3861 | ENSG00000102786 | INTS6  | -1.1 | 0.0223074 | 0.0685972 | 5.074   | 0.027 | 5.050   | 5.102   | 5.641   | 0.107 | 5.561   | 5.762   |
| 3862 | ENSG00000164941 | INTS8  | -1.3 | 2.712E-08 | 8.837E-07 | 26.889  | 1.205 | 25.731  | 28.136  | 35.127  | 3.103 | 31.707  | 37.765  |
| 3864 | ENSG00000104299 | INTS9  | 1.6  | 1.633E-08 | 5.683E-07 | 10.593  | 1.095 | 9.632   | 11.785  | 6.917   | 0.850 | 6.090   | 7.789   |
| 3865 | ENSG00000119509 | INVS   | 1.2  | 0.0326388 | 0.0921569 | 8.087   | 0.937 | 7.383   | 9.150   | 7.161   | 0.934 | 6.515   | 8.231   |
| 3866 | ENSG00000068745 | IP6K2  | -1.2 | 3.368E-07 | 7.724E-06 | 44.003  | 1.089 | 42.767  | 44.823  | 54.135  | 0.442 | 53.858  | 54.645  |
| 3867 | ENSG00000074706 | IPCEF1 | 2.8  | 0.0047511 | 0.0203381 | 0.157   | 0.031 | 0.122   | 0.176   | 0.056   | 0.017 | 0.039   | 0.074   |
| 3868 | ENSG00000205339 | IPO7   | -1.1 | 1.383E-05 | 0.0001756 | 242.807 | 8.692 | 235.847 | 252.550 | 281.828 | 9.168 | 272.330 | 290.626 |
| 3869 | ENSG00000225674 | IPO7P2 | -1.2 | 0.0021492 | 0.0107258 | 38.485  | 1.650 | 36.597  | 39.653  | 45.669  | 2.076 | 43.573  | 47.724  |
| 3871 | ENSG00000198700 | IPO9   | 1.1  | 0.0617229 | 0.1487276 | 46.010  | 1.074 | 44.814  | 46.895  | 44.780  | 1.258 | 43.560  | 46.073  |
| 3872 | ENSG00000166578 | IQCD   | 1.4  | 0.044295  | 0.1157721 | 1.867   | 0.165 | 1.682   | 1.999   | 1.308   | 0.369 | 0.882   | 1.526   |
| 3874 | ENSG00000106012 | IQCE   | 1.2  | 0.0168297 | 0.0552058 | 2.277   | 0.259 | 1.981   | 2.462   | 1.880   | 0.238 | 1.607   | 2.048   |
| 3876 | ENSG00000114473 | IQCG   | 1.3  | 0.0037708 | 0.0169092 | 2.207   | 0.282 | 2.015   | 2.532   | 1.674   | 0.130 | 1.541   | 1.800   |
| 3877 | ENSG00000145703 | IQGAP2 | -1.1 | 0.1104701 | 0.2291368 | 37.160  | 3.861 | 34.916  | 41.618  | 40.285  | 2.281 | 37.823  | 42.325  |
| 3879 | ENSG00000144711 | IQSEC1 | -1.1 | 0.0862748 | 0.1920461 | 15.349  | 0.495 | 14.964  | 15.907  | 16.863  | 1.024 | 16.248  | 18.044  |
| 3880 | ENSG00000120645 | IQSEC3 | -1.3 | 0.0042162 | 0.0185171 | 1.612   | 0.105 | 1.527   | 1.730   | 2.180   | 0.371 | 1.824   | 2.564   |
| 3881 | ENSG00000134070 | IRAK2  | 1.7  | 0.0011793 | 0.006711  | 2.455   | 0.869 | 1.653   | 3.379   | 1.494   | 0.107 | 1.392   | 1.605   |
| 3882 | ENSG00000090376 | IRAK3  | 1.4  | 0.010558  | 0.0380903 | 0.834   | 0.080 | 0.768   | 0.923   | 0.609   | 0.106 | 0.534   | 0.730   |
| 3883 | ENSG00000189001 | IRAK4  | 1.1  | 0.1239764 | 0.2489981 | 6.771   | 0.484 | 6.273   | 7.239   | 6.255   | 0.540 | 5.781   | 6.842   |
| 3884 | ENSG00000136381 | IREB2  | -1.1 | 0.0077658 | 0.0299322 | 49.562  | 2.500 | 46.753  | 51.543  | 54.821  | 2.080 | 52.958  | 57.065  |
| 3885 | ENSG00000125347 | IRF1   | -1.3 | 0.0305929 | 0.0875792 | 1.089   | 0.144 | 0.974   | 1.250   | 1.436   | 0.087 | 1.364   | 1.533   |
| 3887 | ENSG00000137265 | IRF4   | -1.4 | 0.070897  | 0.1653358 | 0.477   | 0.179 | 0.328   | 0.676   | 0.704   | 0.067 | 0.632   | 0.764   |
| 3889 | ENSG00000117595 | IRF6   | -1.2 | 0.0017104 | 0.0090146 | 16.666  | 0.345 | 16.292  | 16.972  | 19.655  | 0.436 | 19.156  | 19.965  |
| 3891 | ENSG00000185507 | IRF7   | -1.5 | 0.0002476 | 0.001895  | 4.603   | 0.871 | 3.710   | 5.450   | 7.201   | 1.653 | 6.146   | 9.105   |
| 3892 | ENSG00000140968 | IRF8   | -2   | 0.009419  | 0.0346839 | 0.230   | 0.030 | 0.200   | 0.260   | 0.478   | 0.251 | 0.259   | 0.752   |
| 3893 | ENSG00000213928 | IRF9   | 1.3  | 0.085536  | 0.190778  | 1.197   | 0.277 | 0.896   | 1.440   | 0.907   | 0.145 | 0.748   | 1.031   |
| 3894 | ENSG00000167378 | IRGQ   | -1.3 | 1.587E-05 | 0.0001951 | 8.098   | 0.407 | 7.684   | 8.498   | 10.358  | 0.491 | 9.921   | 10.889  |
| 3895 | ENSG00000133124 | IRS4   | 1.3  | 0.000821  | 0.0049767 | 11.198  | 0.684 | 10.620  | 11.953  | 9.123   | 1.107 | 7.907   | 10.074  |
| 3897 | ENSG00000170561 | IRX2   | -1.1 | 0.0764925 | 0.1750869 | 34.828  | 2.674 | 32.155  | 37.502  | 39.308  | 3.422 | 35.475  | 42.058  |
| 3899 | ENSG00000177508 | IRX3   | -1.3 | 0.0972641 | 0.2091047 | 1.424   | 0.096 | 1.331   | 1.523   | 1.921   | 0.454 | 1.397   | 2.187   |
| 3901 | ENSG00000135070 | ISCA1  | 1.2  | 0.0002409 | 0.0018537 | 38.564  | 1.518 | 37.369  | 40.271  | 33.857  | 0.804 | 32.973  | 34.546  |
| 3903 | ENSG00000165898 | ISCA2  | -1.2 | 0.0003848 | 0.0027095 | 30.145  | 0.679 | 29.398  | 30.725  | 36.470  | 3.084 | 33.028  | 38.982  |
| 3904 | ENSG00000182149 | IST1   | -1.1 | 0.013833  | 0.0473309 | 63.956  | 1.526 | 62.917  | 65.708  | 69.778  | 1.129 | 68.906  | 71.053  |
| 3905 | ENSG00000105655 | ISYNA1 | -1.1 | 0.0690484 | 0.1621289 | 98.752  | 2.834 | 96.706  | 101.987 | 107.009 | 4.147 | 102.551 | 110.751 |
| 3906 | ENSG00000078747 | ITCH   | -1.2 | 8.244E-05 | 0.0007712 | 32.049  | 1.327 | 31.009  | 33.543  | 38.386  | 3.343 | 34.886  | 41.546  |
| 3907 | ENSG00000129636 | ITFG1  | 1.3  | 6.391E-07 | 1.318E-05 | 15.789  | 0.614 | 15.109  | 16.304  | 12.739  | 0.190 | 12.520  | 12.866  |
| 3909 | ENSG00000111203 | ITFG2  | 1.1  | 0.0854485 | 0.190608  | 5.808   | 0.536 | 5.268   | 6.341   | 5.311   | 0.369 | 4.886   | 5.555   |
| 3910 | ENSG00000213949 | ITGA1  | 1.1  | 0.0481204 | 0.1232622 | 1.601   | 0.121 | 1.496   | 1.733   | 1.425   | 0.124 | 1.285   | 1.525   |
| 3911 | ENSG00000164171 | ITGA2  | -1.2 | 0.0052077 | 0.0217756 | 5.855   | 0.208 | 5.656   | 6.070   | 7.106   | 0.808 | 6.420   | 7.996   |
| 3912 | ENSG00000005961 | ITGA2B | -1.3 | 0.0002916 | 0.0021622 | 3.629   | 0.135 | 3.513   | 3.777   | 4.930   | 0.123 | 4.790   | 5.021   |
| 3916 | ENSG00000005884 | ITGA3  | 1.2  | 0.0503586 | 0.1277127 | 10.417  | 2.022 | 8.846   | 12.698  | 8.899   | 0.911 | 7.858   | 9.551   |
| 3917 | ENSG00000115232 | ITGA4  | -1.5 | 0.0013362 | 0.0073859 | 0.894   | 0.164 | 0.729   | 1.056   | 1.364   | 0.029 | 1.331   | 1.386   |
| 3919 | ENSG00000161638 | ITGA5  | 1.3  | 1.824E-07 | 4.637E-06 | 16.309  | 0.712 | 15.823  | 17.126  | 12.724  | 0.745 | 12.136  | 13.561  |

|      | A               | B             | C    | D         | E         | F       | G      | H       | I       | J       | K      | L       | M       |
|------|-----------------|---------------|------|-----------|-----------|---------|--------|---------|---------|---------|--------|---------|---------|
| 3920 | ENSG00000091409 | ITGA6         | 1    | 0.0858773 | 0.1914267 | 119.443 | 5.786  | 112.794 | 123.327 | 116.426 | 2.353  | 114.672 | 119.101 |
| 3924 | ENSG00000135424 | ITGA7         | 1.3  | 2.578E-08 | 8.466E-07 | 40.533  | 1.732  | 38.970  | 42.396  | 32.291  | 2.265  | 29.957  | 34.480  |
| 3925 | ENSG00000138448 | ITGAV         | 1.1  | 0.0088653 | 0.0330625 | 33.694  | 1.622  | 32.747  | 35.567  | 31.506  | 0.248  | 31.321  | 31.788  |
| 3927 | ENSG00000150093 | ITGB1         | 1.1  | 0.0017658 | 0.0092288 | 226.231 | 15.842 | 215.616 | 244.441 | 211.659 | 1.045  | 210.580 | 212.667 |
| 3928 | ENSG00000132470 | ITGB4         | -1.2 | 0.0380755 | 0.1029775 | 2.665   | 0.116  | 2.577   | 2.797   | 3.231   | 0.096  | 3.124   | 3.308   |
| 3931 | ENSG00000082781 | ITGB5         | 1.2  | 1.861E-07 | 4.684E-06 | 53.895  | 2.772  | 52.180  | 57.093  | 45.137  | 2.469  | 43.600  | 47.985  |
| 3932 | ENSG00000105855 | ITGB8         | 1.4  | 6.423E-05 | 0.0006298 | 2.193   | 0.196  | 1.987   | 2.378   | 1.638   | 0.182  | 1.465   | 1.828   |
| 3933 | ENSG00000123243 | ITIH5         | 1.3  | 0.0002777 | 0.0020804 | 2.119   | 0.186  | 1.905   | 2.241   | 1.647   | 0.076  | 1.593   | 1.734   |
| 3934 | ENSG00000078596 | ITM2A         | -1.2 | 0.0016854 | 0.0089133 | 20.796  | 0.966  | 19.758  | 21.668  | 25.545  | 1.095  | 24.817  | 26.804  |
| 3935 | ENSG00000136156 | ITM2B         | 1.1  | 0.0286344 | 0.0832406 | 43.724  | 1.470  | 42.354  | 45.277  | 41.877  | 2.283  | 39.760  | 44.296  |
| 3936 | ENSG00000135916 | ITM2C         | 1.2  | 1.593E-08 | 5.591E-07 | 368.719 | 1.176  | 367.584 | 369.932 | 313.649 | 15.380 | 297.341 | 327.893 |
| 3937 | ENSG00000125877 | ITPA          | -1.1 | 0.0426046 | 0.1121687 | 46.438  | 1.448  | 45.249  | 48.050  | 51.599  | 1.557  | 50.144  | 53.241  |
| 3938 | ENSG00000100605 | ITPK1         | -1.2 | 0.0002138 | 0.0016795 | 28.438  | 0.400  | 28.115  | 28.885  | 33.871  | 3.877  | 31.481  | 38.345  |
| 3940 | ENSG00000143772 | ITPKB         | 1.3  | 1.244E-05 | 0.0001609 | 8.280   | 0.515  | 7.827   | 8.840   | 6.497   | 0.424  | 6.026   | 6.846   |
| 3942 | ENSG00000150995 | ITPR1         | -1.1 | 0.0862497 | 0.1920154 | 2.270   | 0.240  | 2.039   | 2.519   | 2.605   | 0.136  | 2.485   | 2.753   |
| 3943 | ENSG00000123104 | ITPR2         | 1.1  | 0.0334221 | 0.093727  | 15.818  | 2.231  | 14.396  | 18.389  | 14.603  | 0.363  | 14.214  | 14.935  |
| 3944 | ENSG00000148841 | ITPRIP        | 1.1  | 0.1195434 | 0.2421651 | 8.475   | 0.117  | 8.390   | 8.609   | 8.002   | 0.274  | 7.767   | 8.303   |
| 3948 | ENSG00000198885 | ITPRIPL1      | 1.2  | 0.0267129 | 0.0788199 | 5.402   | 0.219  | 5.252   | 5.653   | 4.681   | 0.118  | 4.572   | 4.807   |
| 3949 | ENSG00000205730 | ITPRIPL2      | 1.3  | 0.0006816 | 0.004287  | 5.516   | 0.861  | 4.525   | 6.068   | 4.211   | 0.498  | 3.841   | 4.778   |
| 3950 | ENSG00000205726 | ITSN1         | -1.1 | 2.876E-05 | 0.0003219 | 15.720  | 0.027  | 15.698  | 15.750  | 18.268  | 0.453  | 17.745  | 18.547  |
| 3951 | ENSG00000116679 | IVNS1ABP      | 1.1  | 0.0016719 | 0.0088561 | 132.717 | 3.091  | 130.504 | 136.249 | 124.809 | 1.384  | 123.213 | 125.665 |
| 3952 | ENSG00000077684 | JADE1         | -1.1 | 3.547E-05 | 0.0003833 | 80.932  | 2.225  | 79.186  | 83.437  | 93.614  | 4.362  | 88.631  | 96.743  |
| 3953 | ENSG00000043143 | JADE2         | 1.4  | 6.523E-09 | 2.584E-07 | 14.211  | 0.688  | 13.678  | 14.988  | 10.387  | 0.511  | 9.969   | 10.958  |
| 3954 | ENSG00000101384 | JAG1          | -1.1 | 0.0516846 | 0.1302162 | 28.784  | 2.341  | 26.314  | 30.971  | 31.564  | 1.182  | 30.221  | 32.443  |
| 3955 | ENSG00000184916 | JAG2          | -1.2 | 0.0150744 | 0.0506363 | 2.601   | 0.254  | 2.310   | 2.770   | 3.306   | 0.524  | 2.792   | 3.838   |
| 3957 | ENSG00000171135 | JAGN1         | -1.3 | 1.292E-05 | 0.0001658 | 21.817  | 1.081  | 21.118  | 23.062  | 29.134  | 1.203  | 28.315  | 30.515  |
| 3958 | ENSG00000162434 | JAK1          | 1.1  | 0.0044661 | 0.0193728 | 27.791  | 1.132  | 26.863  | 29.052  | 25.657  | 1.139  | 24.860  | 26.962  |
| 3959 | ENSG00000096968 | JAK2          | 1.3  | 0.0135969 | 0.046646  | 3.417   | 0.094  | 3.332   | 3.518   | 2.783   | 0.423  | 2.416   | 3.246   |
| 3960 | ENSG00000105639 | JAK3          | -1.2 | 0.002763  | 0.0132058 | 4.878   | 0.330  | 4.616   | 5.248   | 6.093   | 0.371  | 5.854   | 6.519   |
| 3961 | ENSG00000176049 | JAKMIP2       | 1.2  | 6.978E-05 | 0.0006736 | 13.623  | 0.500  | 13.101  | 14.097  | 11.818  | 0.139  | 11.678  | 11.955  |
| 3963 | ENSG00000280780 | JAKMIP2-AS1   | -2   | 4.898E-07 | 1.063E-05 | 2.928   | 0.740  | 2.122   | 3.578   | 6.080   | 0.395  | 5.644   | 6.416   |
| 3964 | ENSG00000140044 | JDP2          | 1.5  | 2.264E-07 | 5.478E-06 | 8.244   | 0.347  | 7.885   | 8.578   | 5.791   | 0.286  | 5.604   | 6.121   |
| 3965 | ENSG00000050130 | JKAMP         | 1.1  | 0.1124878 | 0.2318999 | 24.090  | 2.125  | 21.748  | 25.897  | 22.894  | 1.619  | 21.033  | 23.978  |
| 3966 | ENSG00000171988 | JMJD1C        | 1.1  | 0.0323979 | 0.0916297 | 87.337  | 2.604  | 84.831  | 90.029  | 84.338  | 2.054  | 81.972  | 85.675  |
| 3967 | ENSG00000081692 | JMJD4         | -1.1 | 0.1020694 | 0.2162741 | 4.154   | 0.121  | 4.040   | 4.281   | 4.816   | 0.187  | 4.603   | 4.951   |
| 3968 | ENSG00000168970 | JMJD7-PLA2G4B | -1.3 | 0.0019015 | 0.0097862 | 1.689   | 0.002  | 1.687   | 1.691   | 2.322   | 0.129  | 2.229   | 2.469   |
| 3969 | ENSG00000161999 | JMJD8         | -1.1 | 0.1230348 | 0.2475479 | 31.331  | 0.233  | 31.136  | 31.589  | 34.370  | 2.951  | 31.273  | 37.150  |
| 3970 | ENSG00000152409 | JMY           | -1.1 | 0.0066836 | 0.0265226 | 13.039  | 0.547  | 12.598  | 13.651  | 14.904  | 0.531  | 14.307  | 15.325  |
| 3974 | ENSG00000104369 | JPH1          | 1.1  | 0.0149184 | 0.0502317 | 16.656  | 0.893  | 15.996  | 17.672  | 15.205  | 0.536  | 14.721  | 15.781  |
| 3975 | ENSG00000149596 | JPH2          | 2.1  | 1.016E-07 | 2.781E-06 | 2.527   | 0.513  | 1.987   | 3.008   | 1.243   | 0.102  | 1.132   | 1.333   |
| 3976 | ENSG00000092051 | JPH4          | -1.2 | 1.274E-05 | 0.000164  | 19.063  | 0.234  | 18.862  | 19.320  | 23.818  | 1.587  | 22.201  | 25.374  |

|      | A               | B       | C    | D         | E         | F       | G     | H       | I       | J       | K     | L       | M       |
|------|-----------------|---------|------|-----------|-----------|---------|-------|---------|---------|---------|-------|---------|---------|
| 3978 | ENSG00000206053 | JPT2    | 1.1  | 0.019638  | 0.0620819 | 109.426 | 3.458 | 105.454 | 111.770 | 104.845 | 0.931 | 104.024 | 105.856 |
| 3983 | ENSG00000225470 | JPX     | 1.2  | 0.0002024 | 0.0016106 | 11.663  | 0.703 | 10.907  | 12.298  | 10.224  | 0.256 | 9.995   | 10.500  |
| 3985 | ENSG00000234616 | JRK     | -1.1 | 0.0044729 | 0.0193973 | 15.057  | 0.879 | 14.043  | 15.604  | 17.072  | 0.475 | 16.527  | 17.404  |
| 3986 | ENSG00000177606 | JUN     | 1.6  | 4.437E-10 | 2.367E-08 | 19.328  | 0.852 | 18.350  | 19.907  | 12.449  | 1.566 | 11.055  | 14.143  |
| 3987 | ENSG00000130522 | JUND    | 1.1  | 0.0077478 | 0.0298869 | 76.244  | 1.287 | 75.332  | 77.716  | 68.146  | 7.589 | 59.519  | 73.792  |
| 3988 | ENSG00000173801 | JUP     | -1.1 | 0.0003186 | 0.0023186 | 58.985  | 2.425 | 56.584  | 61.434  | 68.536  | 3.717 | 65.039  | 72.440  |
| 3989 | ENSG00000197256 | KANK2   | 1.3  | 2.631E-06 | 4.307E-05 | 16.717  | 1.650 | 15.039  | 18.337  | 13.353  | 0.349 | 13.000  | 13.699  |
| 3990 | ENSG00000186994 | KANK3   | 1.2  | 0.0796051 | 0.1805742 | 3.325   | 0.427 | 2.835   | 3.617   | 2.791   | 0.338 | 2.549   | 3.177   |
| 3992 | ENSG00000232593 | KANTR   | -1.1 | 0.0401702 | 0.1073129 | 4.793   | 0.489 | 4.322   | 5.298   | 5.589   | 0.616 | 4.881   | 6.003   |
| 3993 | ENSG00000065427 | KARS    | -1.1 | 4.284E-05 | 0.0004512 | 131.979 | 4.797 | 128.167 | 137.366 | 152.394 | 0.726 | 151.555 | 152.821 |
| 3994 | ENSG00000108773 | KAT2A   | -1.3 | 8.26E-07  | 1.624E-05 | 31.399  | 0.851 | 30.732  | 32.357  | 40.137  | 0.740 | 39.297  | 40.692  |
| 3995 | ENSG00000083168 | KAT6A   | -1.1 | 0.0559705 | 0.1383353 | 16.103  | 0.492 | 15.771  | 16.668  | 17.574  | 0.083 | 17.485  | 17.650  |
| 3997 | ENSG00000136504 | KAT7    | -1.3 | 2.90E-12  | 2.814E-10 | 23.712  | 0.842 | 22.936  | 24.607  | 32.446  | 0.724 | 31.676  | 33.113  |
| 3999 | ENSG00000103510 | KAT8    | -1.2 | 7.873E-07 | 1.561E-05 | 28.289  | 0.747 | 27.816  | 29.151  | 36.107  | 2.240 | 33.755  | 38.216  |
| 4000 | ENSG00000140854 | KATNB1  | 1.1  | 0.0755363 | 0.1733675 | 20.078  | 0.450 | 19.778  | 20.595  | 18.964  | 0.954 | 17.921  | 19.793  |
| 4001 | ENSG00000189337 | KAZN    | 1.1  | 0.1242856 | 0.2493386 | 3.318   | 0.082 | 3.227   | 3.385   | 3.101   | 0.232 | 2.833   | 3.237   |
| 4002 | ENSG00000176595 | KBTBD11 | 1.2  | 0.0649371 | 0.1546438 | 4.612   | 0.651 | 4.108   | 5.347   | 4.091   | 0.393 | 3.656   | 4.421   |
| 4005 | ENSG00000182359 | KBTBD3  | -1.4 | 0.0053334 | 0.0221796 | 1.781   | 0.173 | 1.607   | 1.954   | 2.480   | 0.200 | 2.297   | 2.693   |
| 4006 | ENSG00000123444 | KBTBD4  | -1.1 | 0.0950413 | 0.2059927 | 8.388   | 0.059 | 8.347   | 8.456   | 9.552   | 0.470 | 9.141   | 10.065  |
| 4008 | ENSG00000165572 | KBTBD6  | -1.1 | 0.0279408 | 0.0817157 | 11.517  | 0.551 | 10.890  | 11.926  | 13.260  | 0.150 | 13.129  | 13.424  |
| 4009 | ENSG00000120696 | KBTBD7  | -1.2 | 3.697E-05 | 0.0003972 | 15.869  | 0.723 | 15.126  | 16.572  | 20.111  | 1.388 | 18.863  | 21.606  |
| 4010 | ENSG00000176407 | KCMF1   | -1.1 | 0.0075062 | 0.0290908 | 36.821  | 1.344 | 35.320  | 37.912  | 40.948  | 1.608 | 39.098  | 42.015  |
| 4011 | ENSG00000111262 | KCNA1   | 2.1  | 5.954E-06 | 8.592E-05 | 1.142   | 0.185 | 0.960   | 1.330   | 0.565   | 0.018 | 0.548   | 0.584   |
| 4013 | ENSG00000169282 | KCNAB1  | 1.5  | 0.001204  | 0.0068288 | 1.571   | 0.295 | 1.251   | 1.832   | 1.061   | 0.063 | 1.023   | 1.133   |
| 4014 | ENSG00000069424 | KCNAB2  | 1.7  | 9.14E-09  | 3.45E-07  | 4.691   | 0.581 | 4.292   | 5.358   | 2.839   | 0.223 | 2.690   | 3.095   |
| 4015 | ENSG00000170049 | KCNAB3  | -1.3 | 0.0208995 | 0.0653492 | 1.940   | 0.108 | 1.870   | 2.064   | 2.604   | 0.240 | 2.368   | 2.848   |
| 4016 | ENSG00000158445 | KCNB1   | 1.2  | 0.1004587 | 0.2138524 | 0.635   | 0.117 | 0.508   | 0.739   | 0.538   | 0.041 | 0.492   | 0.570   |
| 4017 | ENSG00000116396 | KCNC4   | -1.1 | 0.1005898 | 0.2139969 | 3.213   | 0.177 | 3.013   | 3.351   | 3.553   | 0.184 | 3.374   | 3.741   |
| 4018 | ENSG00000102057 | KCND1   | -1.2 | 0.1022034 | 0.2165041 | 2.609   | 0.441 | 2.258   | 3.104   | 3.102   | 0.339 | 2.730   | 3.394   |
| 4019 | ENSG00000184408 | KCND2   | 1.2  | 0.0056455 | 0.023277  | 8.034   | 0.538 | 7.606   | 8.638   | 6.967   | 0.261 | 6.813   | 7.269   |
| 4022 | ENSG00000175538 | KCNE3   | 1.3  | 0.0085735 | 0.0321943 | 3.880   | 0.265 | 3.606   | 4.136   | 3.020   | 0.076 | 2.935   | 3.083   |
| 4023 | ENSG00000176076 | KCNE5   | 1.4  | 0.0113937 | 0.0404666 | 7.681   | 1.669 | 6.716   | 9.609   | 5.778   | 0.307 | 5.521   | 6.118   |
| 4025 | ENSG00000162975 | KCNF1   | 1.5  | 0.0191439 | 0.0608955 | 1.854   | 0.361 | 1.562   | 2.258   | 1.252   | 0.287 | 1.018   | 1.572   |
| 4026 | ENSG00000171126 | KCNG3   | -1.4 | 0.0001615 | 0.001342  | 4.299   | 0.618 | 3.784   | 4.984   | 6.250   | 0.243 | 6.012   | 6.498   |
| 4027 | ENSG00000055118 | KCNH2   | -1.3 | 0.0001225 | 0.0010671 | 5.202   | 0.643 | 4.497   | 5.755   | 7.090   | 0.543 | 6.553   | 7.639   |
| 4028 | ENSG00000184611 | KCNH7   | -1.7 | 0.0071593 | 0.0280224 | 0.516   | 0.102 | 0.419   | 0.623   | 0.927   | 0.331 | 0.723   | 1.309   |
| 4030 | ENSG00000183960 | KCNH8   | -1.3 | 0.0021075 | 0.0105684 | 2.715   | 0.252 | 2.547   | 3.005   | 3.619   | 0.381 | 3.256   | 4.016   |
| 4031 | ENSG00000184185 | KCNJ12  | -1.4 | 0.0291989 | 0.0845183 | 0.923   | 0.119 | 0.854   | 1.061   | 1.292   | 0.275 | 1.009   | 1.559   |
| 4033 | ENSG00000182324 | KCNJ14  | -1.6 | 0.0413341 | 0.1096257 | 0.501   | 0.054 | 0.442   | 0.549   | 0.824   | 0.161 | 0.685   | 1.000   |
| 4036 | ENSG00000100433 | KCNK10  | 1.4  | 0.0612092 | 0.1479113 | 0.497   | 0.087 | 0.429   | 0.595   | 0.360   | 0.112 | 0.246   | 0.470   |
| 4037 | ENSG00000164626 | KCNK5   | -1.2 | 1.362E-05 | 0.0001732 | 26.077  | 2.285 | 24.686  | 28.714  | 32.764  | 1.700 | 31.769  | 34.728  |
| 4039 | ENSG00000099337 | KCNK6   | -1.4 | 1.058E-07 | 2.867E-06 | 7.390   | 0.342 | 7.036   | 7.719   | 10.541  | 0.671 | 9.824   | 11.155  |
| 4041 | ENSG00000135643 | KCNMB4  | 1.1  | 0.0633832 | 0.1519906 | 17.820  | 0.707 | 17.005  | 18.266  | 16.763  | 0.521 | 16.218  | 17.257  |



|      | A               | B              | C    | D         | E         | F       | G      | H       | I       | J       | K      | L       | M       |
|------|-----------------|----------------|------|-----------|-----------|---------|--------|---------|---------|---------|--------|---------|---------|
| 4042 | ENSG00000080709 | KCNN2          | -1.2 | 0.0587234 | 0.1432501 | 4.881   | 0.441  | 4.473   | 5.349   | 5.822   | 0.773  | 5.225   | 6.694   |
| 4043 | ENSG00000143603 | KCNN3          | -1.2 | 0.067724  | 0.1598181 | 0.788   | 0.077  | 0.739   | 0.877   | 0.971   | 0.105  | 0.871   | 1.081   |
| 4045 | ENSG00000269821 | KCNQ1OT1       | -1.3 | 0.0231098 | 0.0705573 | 0.208   | 0.023  | 0.193   | 0.235   | 0.283   | 0.054  | 0.221   | 0.322   |
| 4049 | ENSG00000075043 | KCNQ2          | -1.3 | 4.346E-05 | 0.0004562 | 5.612   | 0.146  | 5.459   | 5.749   | 7.570   | 0.724  | 6.898   | 8.337   |
| 4052 | ENSG00000185760 | KCNQ5          | -1.6 | 0.0129987 | 0.0450322 | 0.385   | 0.139  | 0.254   | 0.531   | 0.641   | 0.215  | 0.393   | 0.772   |
| 4055 | ENSG00000124134 | KCNS1          | 1.5  | 0.0005456 | 0.0035908 | 2.818   | 0.217  | 2.637   | 3.058   | 1.901   | 0.385  | 1.545   | 2.309   |
| 4056 | ENSG00000162687 | KCNT2          | -1.1 | 0.0759825 | 0.1741639 | 7.990   | 0.351  | 7.699   | 8.380   | 9.013   | 0.481  | 8.701   | 9.567   |
| 4057 | ENSG00000110906 | KCTD10         | 1.1  | 0.0407964 | 0.108598  | 20.105  | 1.612  | 18.439  | 21.656  | 19.091  | 0.167  | 18.898  | 19.190  |
| 4060 | ENSG00000178695 | KCTD12         | 1.2  | 0.0020972 | 0.0105369 | 9.259   | 0.888  | 8.372   | 10.148  | 7.820   | 0.449  | 7.534   | 8.338   |
| 4061 | ENSG00000174943 | KCTD13         | -1.2 | 0.0368848 | 0.1006183 | 3.991   | 0.405  | 3.647   | 4.437   | 4.813   | 0.381  | 4.377   | 5.084   |
| 4062 | ENSG00000153885 | KCTD15         | 1.1  | 0.0189684 | 0.0604717 | 15.460  | 0.919  | 14.399  | 16.027  | 14.203  | 1.009  | 13.376  | 15.327  |
| 4064 | ENSG00000183775 | KCTD16         | -1.9 | 0.0026759 | 0.0128794 | 0.131   | 0.042  | 0.093   | 0.176   | 0.259   | 0.054  | 0.198   | 0.304   |
| 4065 | ENSG00000100379 | KCTD17         | -1.1 | 0.0332852 | 0.093436  | 14.715  | 1.721  | 13.302  | 16.631  | 17.040  | 0.606  | 16.667  | 17.739  |
| 4067 | ENSG00000155729 | KCTD18         | 1.2  | 0.0021219 | 0.0106196 | 7.334   | 0.250  | 7.119   | 7.608   | 6.014   | 0.664  | 5.263   | 6.523   |
| 4068 | ENSG00000112078 | KCTD20         | 1.1  | 0.0228714 | 0.0700387 | 38.865  | 1.242  | 37.945  | 40.278  | 37.002  | 0.957  | 36.292  | 38.091  |
| 4070 | ENSG00000246174 | KCTD21-<br>AS1 | -1.2 | 0.1157282 | 0.2365616 | 2.376   | 0.529  | 1.768   | 2.729   | 2.901   | 0.219  | 2.731   | 3.148   |
| 4071 | ENSG00000136636 | KCTD3          | -1.1 | 0.0613135 | 0.1480364 | 63.398  | 2.874  | 60.307  | 65.989  | 68.612  | 3.337  | 66.323  | 72.440  |
| 4072 | ENSG00000183783 | KCTD8          | -1.4 | 0.0343019 | 0.0954818 | 1.606   | 0.295  | 1.267   | 1.803   | 2.265   | 0.283  | 1.967   | 2.530   |
| 4073 | ENSG00000134901 | KDELC1         | 1.4  | 1.566E-06 | 2.754E-05 | 26.751  | 0.734  | 26.152  | 27.570  | 19.930  | 2.083  | 17.906  | 22.068  |
| 4074 | ENSG00000178202 | KDELC2         | 1.1  | 0.0352672 | 0.0974312 | 21.716  | 0.415  | 21.428  | 22.192  | 20.435  | 0.319  | 20.172  | 20.790  |
| 4075 | ENSG00000105438 | KDELR1         | -1.1 | 0.0001197 | 0.001047  | 153.050 | 6.236  | 146.136 | 158.251 | 178.464 | 10.283 | 171.780 | 190.305 |
| 4077 | ENSG00000165097 | KDM1B          | -1.2 | 0.0096226 | 0.0353108 | 4.631   | 0.178  | 4.437   | 4.788   | 5.757   | 0.379  | 5.408   | 6.161   |
| 4078 | ENSG00000089094 | KDM2B          | 1.1  | 0.0025399 | 0.0123299 | 27.975  | 1.552  | 26.184  | 28.945  | 25.933  | 1.335  | 25.114  | 27.473  |
| 4079 | ENSG00000066135 | KDM4A          | -1.2 | 3.578E-06 | 5.572E-05 | 61.581  | 3.334  | 57.779  | 64.007  | 73.916  | 1.934  | 72.085  | 75.938  |
| 4082 | ENSG00000236200 | KDM4A-<br>AS1  | -1.8 | 0.0156968 | 0.0522908 | 0.843   | 0.303  | 0.540   | 1.147   | 1.547   | 0.435  | 1.046   | 1.815   |
| 4083 | ENSG00000127663 | KDM4B          | -1.1 | 0.0841458 | 0.1885978 | 10.826  | 0.834  | 10.143  | 11.756  | 11.833  | 0.801  | 10.910  | 12.337  |
| 4085 | ENSG00000073614 | KDM5A          | -1.1 | 0.0445438 | 0.1161711 | 15.767  | 0.276  | 15.459  | 15.995  | 17.186  | 0.391  | 16.770  | 17.545  |
| 4087 | ENSG00000117139 | KDM5B          | -1.1 | 2.617E-06 | 4.298E-05 | 68.707  | 0.581  | 68.316  | 69.374  | 80.238  | 0.888  | 79.242  | 80.945  |
| 4092 | ENSG00000147050 | KDM6A          | 1.4  | 3.00E-11  | 2.228E-09 | 144.149 | 10.191 | 132.382 | 150.058 | 105.801 | 6.517  | 101.590 | 113.307 |
| 4095 | ENSG00000006459 | KDM7A          | -1.1 | 0.0527704 | 0.1324193 | 13.033  | 0.269  | 12.729  | 13.240  | 14.324  | 0.670  | 13.669  | 15.007  |
| 4096 | ENSG00000128052 | KDR            | -1.2 | 0.0051183 | 0.0215178 | 50.377  | 5.467  | 46.123  | 56.543  | 60.329  | 5.163  | 55.108  | 65.432  |
| 4098 | ENSG00000119537 | KDSR           | 1.2  | 7.461E-05 | 0.0007117 | 13.332  | 0.835  | 12.774  | 14.292  | 11.292  | 0.451  | 10.854  | 11.756  |
| 4099 | ENSG00000079999 | KEAP1          | -1.1 | 0.0171026 | 0.0558194 | 30.587  | 1.695  | 29.129  | 32.447  | 34.721  | 2.492  | 32.570  | 37.452  |
| 4100 | ENSG00000197993 | KEL            | -1.3 | 0.0259234 | 0.0770161 | 2.127   | 0.515  | 1.544   | 2.522   | 2.864   | 0.470  | 2.552   | 3.404   |
| 4103 | ENSG00000131773 | KHDRBS3        | 1.2  | 0.0041361 | 0.018255  | 7.104   | 0.381  | 6.802   | 7.532   | 6.249   | 0.249  | 6.018   | 6.513   |
| 4104 | ENSG00000100441 | KHNYN          | -1.1 | 0.0512777 | 0.1294031 | 27.558  | 0.499  | 26.995  | 27.945  | 30.051  | 1.951  | 28.484  | 32.236  |
| 4107 | ENSG00000088247 | KHSRP          | -1.1 | 0.0423516 | 0.1117114 | 160.814 | 2.404  | 158.323 | 163.119 | 173.751 | 6.279  | 167.527 | 180.083 |
| 4108 | ENSG00000235750 | KIAA0040       | 1.3  | 2.582E-05 | 0.0002941 | 17.670  | 0.734  | 16.914  | 18.379  | 14.371  | 1.063  | 13.145  | 15.033  |
| 4109 | ENSG00000081791 | KIAA0141       | -1.1 | 0.0030244 | 0.0141889 | 31.469  | 1.434  | 29.959  | 32.812  | 35.698  | 1.371  | 34.748  | 37.270  |

|      | A               | B         | C    | D         | E         | F       | G     | H       | I       | J       | K     | L       | M       |
|------|-----------------|-----------|------|-----------|-----------|---------|-------|---------|---------|---------|-------|---------|---------|
| 4113 | ENSG00000170871 | KIAA0232  | 1.2  | 1.178E-05 | 0.0001533 | 26.730  | 0.954 | 25.640  | 27.413  | 23.166  | 0.974 | 22.414  | 24.266  |
| 4115 | ENSG00000137261 | KIAA0319  | 1.9  | 0.0013675 | 0.0075164 | 0.723   | 0.222 | 0.535   | 0.968   | 0.391   | 0.057 | 0.326   | 0.433   |
| 4117 | ENSG00000136813 | KIAA0368  | 1.1  | 0.0046313 | 0.0199313 | 67.602  | 3.038 | 65.415  | 71.070  | 63.502  | 3.114 | 59.909  | 65.418  |
| 4118 | ENSG00000100578 | KIAA0586  | -1.1 | 0.0492136 | 0.1255997 | 9.920   | 0.700 | 9.154   | 10.525  | 11.031  | 0.391 | 10.659  | 11.438  |
| 4119 | ENSG00000185261 | KIAA0825  | 1.5  | 5.847E-06 | 8.489E-05 | 3.515   | 0.540 | 2.979   | 4.059   | 2.402   | 0.141 | 2.239   | 2.496   |
| 4121 | ENSG00000196123 | KIAA0895L | -1.2 | 0.0010761 | 0.0062456 | 8.800   | 0.355 | 8.478   | 9.180   | 11.136  | 0.845 | 10.160  | 11.648  |
| 4122 | ENSG00000132680 | KIAA0907  | -1.2 | 3.08E-06  | 4.891E-05 | 32.801  | 1.596 | 31.436  | 34.556  | 40.557  | 1.559 | 39.273  | 42.292  |
| 4124 | ENSG00000100364 | KIAA0930  | 1.1  | 0.0677915 | 0.1598881 | 19.245  | 0.714 | 18.421  | 19.658  | 18.423  | 0.948 | 17.790  | 19.513  |
| 4125 | ENSG00000163807 | KIAA1143  | -1.1 | 0.0303595 | 0.0870437 | 44.364  | 2.298 | 42.622  | 46.969  | 48.957  | 0.949 | 48.123  | 49.990  |
| 4126 | ENSG00000257093 | KIAA1147  | -1.1 | 0.0463207 | 0.1197892 | 31.573  | 0.611 | 31.171  | 32.275  | 34.402  | 1.186 | 33.055  | 35.294  |
| 4129 | ENSG00000109265 | KIAA1211  | 1.1  | 0.0482964 | 0.1236321 | 12.989  | 0.195 | 12.764  | 13.114  | 12.171  | 0.453 | 11.702  | 12.605  |
| 4130 | ENSG00000196872 | KIAA1211L | 2.5  | 4.719E-05 | 0.0004884 | 1.270   | 0.191 | 1.130   | 1.488   | 0.510   | 0.105 | 0.396   | 0.603   |
| 4132 | ENSG00000120549 | KIAA1217  | 1.3  | 5.968E-07 | 1.249E-05 | 9.800   | 0.234 | 9.542   | 10.001  | 7.848   | 0.265 | 7.645   | 8.148   |
| 4133 | ENSG00000150477 | KIAA1328  | -1.3 | 0.0039753 | 0.0176887 | 1.700   | 0.113 | 1.593   | 1.818   | 2.215   | 0.149 | 2.122   | 2.387   |
| 4134 | ENSG00000164944 | KIAA1429  | -1.2 | 5.825E-07 | 1.224E-05 | 20.369  | 0.490 | 19.808  | 20.712  | 24.998  | 1.120 | 23.776  | 25.977  |
| 4135 | ENSG00000165757 | KIAA1462  | -1.3 | 0.0031739 | 0.0147511 | 1.578   | 0.238 | 1.304   | 1.738   | 2.094   | 0.034 | 2.057   | 2.122   |
| 4136 | ENSG00000134444 | KIAA1468  | 1.1  | 0.0064112 | 0.0256524 | 16.796  | 0.464 | 16.449  | 17.324  | 15.429  | 0.706 | 15.001  | 16.243  |
| 4140 | ENSG00000162522 | KIAA1522  | -1.2 | 5.165E-08 | 1.532E-06 | 50.803  | 1.853 | 49.528  | 52.929  | 64.115  | 1.917 | 62.642  | 66.283  |
| 4141 | ENSG00000163507 | KIAA1524  | -1.1 | 0.0912282 | 0.2003821 | 37.066  | 1.555 | 35.595  | 38.693  | 40.467  | 3.046 | 37.845  | 43.808  |
| 4143 | ENSG00000122778 | KIAA1549  | -1.1 | 0.0408253 | 0.1086215 | 7.887   | 0.299 | 7.544   | 8.092   | 8.824   | 0.862 | 7.898   | 9.603   |
| 4145 | ENSG00000174718 | KIAA1551  | -1.1 | 0.0015592 | 0.0083532 | 36.824  | 0.538 | 36.204  | 37.168  | 42.301  | 1.916 | 40.403  | 44.234  |
| 4146 | ENSG00000138944 | KIAA1644  | 1.4  | 1.466E-05 | 0.0001831 | 5.309   | 0.278 | 5.098   | 5.624   | 3.886   | 0.348 | 3.508   | 4.193   |
| 4147 | ENSG00000162929 | KIAA1841  | 1.1  | 0.0718233 | 0.1670674 | 4.972   | 0.444 | 4.623   | 5.472   | 4.526   | 0.251 | 4.239   | 4.703   |
| 4149 | ENSG00000165185 | KIAA1958  | -1.2 | 5.534E-06 | 8.105E-05 | 11.607  | 0.272 | 11.295  | 11.794  | 14.682  | 1.254 | 13.235  | 15.456  |
| 4150 | ENSG00000134313 | KIDINS220 | 1.1  | 0.0993779 | 0.2124073 | 15.840  | 0.639 | 15.168  | 16.440  | 15.345  | 0.737 | 14.552  | 16.008  |
| 4152 | ENSG00000138160 | KIF11     | -1.2 | 5.598E-05 | 0.0005616 | 75.640  | 5.776 | 70.708  | 81.994  | 89.519  | 5.170 | 86.052  | 95.462  |
| 4156 | ENSG00000136883 | KIF12     | -1.5 | 0.0172108 | 0.0560644 | 1.424   | 0.450 | 0.931   | 1.811   | 2.135   | 0.279 | 1.815   | 2.324   |
| 4157 | ENSG00000118193 | KIF14     | -1.2 | 1.684E-05 | 0.0002052 | 31.701  | 2.161 | 30.137  | 34.167  | 38.892  | 2.983 | 35.960  | 41.922  |
| 4159 | ENSG00000163808 | KIF15     | -1.2 | 3.787E-06 | 5.833E-05 | 17.747  | 0.988 | 16.660  | 18.590  | 22.651  | 1.460 | 20.981  | 23.683  |
| 4160 | ENSG00000117245 | KIF17     | -1.3 | 0.0002371 | 0.001833  | 7.369   | 1.077 | 6.144   | 8.164   | 9.839   | 0.475 | 9.296   | 10.180  |
| 4163 | ENSG00000121621 | KIF18A    | -1.1 | 0.0104677 | 0.0378454 | 19.130  | 1.150 | 17.873  | 20.129  | 22.407  | 1.534 | 20.793  | 23.846  |
| 4166 | ENSG00000130294 | KIF1A     | 1.3  | 2.56E-12  | 2.546E-10 | 102.672 | 2.811 | 100.724 | 105.894 | 79.200  | 3.776 | 76.952  | 83.560  |
| 4167 | ENSG00000054523 | KIF1B     | -1.1 | 0.0020389 | 0.0103093 | 33.311  | 1.166 | 32.120  | 34.450  | 37.167  | 0.564 | 36.758  | 37.811  |
| 4168 | ENSG00000129250 | KIF1C     | -1.1 | 0.037132  | 0.1010643 | 37.100  | 2.133 | 34.898  | 39.156  | 40.473  | 1.067 | 39.621  | 41.670  |
| 4169 | ENSG00000112984 | KIF20A    | -1.4 | 1.62E-13  | 2.11E-11  | 93.660  | 4.869 | 90.453  | 99.263  | 133.645 | 4.504 | 128.658 | 137.414 |
| 4170 | ENSG00000116852 | KIF21B    | -1.1 | 0.0314277 | 0.0894842 | 12.956  | 0.254 | 12.699  | 13.206  | 14.360  | 1.076 | 13.689  | 15.601  |
| 4175 | ENSG00000079616 | KIF22     | -1.1 | 0.0015041 | 0.0081065 | 87.485  | 1.598 | 86.217  | 89.280  | 98.392  | 1.156 | 97.350  | 99.635  |
| 4176 | ENSG00000137807 | KIF23     | -1.1 | 0.0020713 | 0.0104321 | 59.392  | 2.666 | 56.819  | 62.142  | 67.208  | 4.348 | 63.342  | 71.916  |
| 4179 | ENSG00000186638 | KIF24     | 1.2  | 0.0063706 | 0.0255139 | 3.929   | 0.225 | 3.669   | 4.072   | 3.224   | 0.346 | 2.913   | 3.597   |
| 4180 | ENSG00000066735 | KIF26A    | -1.4 | 2.696E-09 | 1.181E-07 | 12.681  | 0.441 | 12.304  | 13.165  | 18.616  | 2.184 | 17.267  | 21.136  |

|      | A               | B       | C    | D         | E         | F       | G     | H       | I       | J       | K     | L       | M       |
|------|-----------------|---------|------|-----------|-----------|---------|-------|---------|---------|---------|-------|---------|---------|
| 4181 | ENSG00000142945 | KIF2C   | -1.3 | 5.34E-11  | 3.75E-09  | 119.577 | 0.853 | 118.934 | 120.545 | 158.102 | 8.475 | 148.612 | 164.919 |
| 4182 | ENSG00000101350 | KIF3B   | -1.2 | 0.0001952 | 0.0015633 | 15.186  | 0.312 | 14.878  | 15.501  | 18.217  | 0.834 | 17.431  | 19.092  |
| 4183 | ENSG00000090889 | KIF4A   | -1.2 | 4.251E-07 | 9.435E-06 | 55.082  | 2.641 | 53.369  | 58.123  | 68.124  | 2.195 | 66.520  | 70.626  |
| 4184 | ENSG00000155980 | KIF5A   | -1.1 | 0.0798946 | 0.1810831 | 14.616  | 1.115 | 13.851  | 15.896  | 16.322  | 1.668 | 14.847  | 18.132  |
| 4185 | ENSG00000170759 | KIF5B   | -1.1 | 0.0136866 | 0.046906  | 122.470 | 0.634 | 121.759 | 122.974 | 134.062 | 5.946 | 129.324 | 140.734 |
| 4187 | ENSG00000168280 | KIF5C   | 1.1  | 0.0465158 | 0.1201652 | 32.806  | 0.946 | 31.953  | 33.823  | 31.582  | 0.396 | 31.246  | 32.019  |
| 4188 | ENSG00000088727 | KIF9    | -1.5 | 0.0096075 | 0.0352707 | 0.777   | 0.133 | 0.631   | 0.891   | 1.180   | 0.249 | 0.936   | 1.434   |
| 4189 | ENSG00000237649 | KIFC1   | -1.1 | 0.0074967 | 0.0290607 | 84.363  | 0.451 | 83.967  | 84.854  | 94.044  | 3.585 | 89.907  | 96.224  |
| 4190 | ENSG00000167702 | KIFC2   | -1.2 | 0.003329  | 0.015304  | 7.672   | 0.204 | 7.537   | 7.907   | 9.632   | 1.331 | 8.181   | 10.797  |
| 4191 | ENSG00000140859 | KIFC3   | -1.3 | 0.0530906 | 0.1330057 | 1.123   | 0.324 | 0.816   | 1.461   | 1.449   | 0.206 | 1.278   | 1.678   |
| 4192 | ENSG00000183853 | KIRREL  | 1.2  | 3.68E-06  | 5.711E-05 | 24.522  | 0.764 | 23.903  | 25.376  | 20.630  | 1.533 | 18.953  | 21.957  |
| 4193 | ENSG00000126259 | KIRREL2 | -1.2 | 0.0954539 | 0.2065787 | 3.490   | 0.542 | 2.881   | 3.921   | 4.231   | 0.599 | 3.750   | 4.902   |
| 4194 | ENSG00000116014 | KISS1R  | 1.6  | 0.0652573 | 0.1552595 | 1.293   | 0.310 | 0.967   | 1.583   | 0.818   | 0.269 | 0.596   | 1.117   |
| 4195 | ENSG00000157404 | KIT     | -1.1 | 0.096296  | 0.2077364 | 15.187  | 1.044 | 14.013  | 16.014  | 16.763  | 1.284 | 15.300  | 17.699  |
| 4197 | ENSG00000049130 | KITLG   | -1.2 | 0.0018343 | 0.0095165 | 13.318  | 1.428 | 12.230  | 14.936  | 16.658  | 2.404 | 14.526  | 19.263  |
| 4198 | ENSG00000088970 | KIZ     | -1.2 | 6.956E-05 | 0.0006726 | 21.125  | 0.283 | 20.801  | 21.323  | 25.603  | 0.330 | 25.232  | 25.865  |
| 4200 | ENSG00000126214 | KLC1    | -1.1 | 0.0057604 | 0.0236468 | 4.660   | 0.113 | 4.594   | 4.790   | 5.413   | 0.510 | 4.848   | 5.841   |
| 4201 | ENSG00000174996 | KLC2    | -1.1 | 0.0128574 | 0.0445882 | 16.700  | 0.680 | 16.276  | 17.484  | 19.003  | 0.922 | 18.452  | 20.067  |
| 4202 | ENSG00000155090 | KLF10   | 1.5  | 2.86E-11  | 2.14E-09  | 27.612  | 1.199 | 26.313  | 28.677  | 18.605  | 1.824 | 17.109  | 20.637  |
| 4203 | ENSG00000172059 | KLF11   | 1.9  | 2.63E-11  | 1.99E-09  | 8.286   | 0.522 | 7.754   | 8.798   | 4.357   | 0.477 | 4.056   | 4.907   |
| 4204 | ENSG00000118922 | KLF12   | 1.3  | 2.726E-06 | 4.429E-05 | 7.006   | 0.422 | 6.628   | 7.461   | 5.508   | 0.250 | 5.225   | 5.701   |
| 4205 | ENSG00000169926 | KLF13   | -1.2 | 0.0002448 | 0.0018785 | 20.371  | 1.050 | 19.317  | 21.417  | 23.974  | 1.417 | 22.910  | 25.582  |
| 4206 | ENSG00000109787 | KLF3    | 1.1  | 0.0081061 | 0.030899  | 15.565  | 0.314 | 15.217  | 15.828  | 14.277  | 0.274 | 14.046  | 14.579  |
| 4207 | ENSG00000102554 | KLF5    | 1.6  | 0.0004631 | 0.0031427 | 2.498   | 0.305 | 2.276   | 2.846   | 1.623   | 0.081 | 1.567   | 1.715   |
| 4208 | ENSG00000067082 | KLF6    | -1.1 | 0.0861824 | 0.1918907 | 17.980  | 1.059 | 16.818  | 18.892  | 19.767  | 1.589 | 18.445  | 21.530  |
| 4209 | ENSG00000118263 | KLF7    | 1.3  | 7.923E-07 | 1.567E-05 | 10.234  | 1.117 | 9.294   | 11.469  | 7.759   | 0.320 | 7.396   | 8.000   |
| 4210 | ENSG00000102349 | KLF8    | -1.1 | 0.0481228 | 0.1232622 | 7.367   | 0.345 | 7.070   | 7.745   | 8.312   | 0.312 | 7.953   | 8.494   |
| 4211 | ENSG00000119138 | KLF9    | 1.4  | 5.081E-05 | 0.0005189 | 4.924   | 0.441 | 4.422   | 5.253   | 3.510   | 0.422 | 3.091   | 3.934   |
| 4212 | ENSG00000128607 | KLHDC10 | -1.1 | 0.114211  | 0.2342604 | 14.895  | 0.512 | 14.309  | 15.251  | 16.325  | 1.493 | 15.127  | 17.997  |
| 4214 | ENSG00000124702 | KLHDC3  | -1.1 | 0.0405121 | 0.1080727 | 163.409 | 8.060 | 154.957 | 171.009 | 177.823 | 7.540 | 171.640 | 186.222 |
| 4215 | ENSG00000179023 | KLHDC7A | 1.8  | 3.399E-10 | 1.91E-08  | 12.527  | 2.294 | 10.772  | 15.123  | 7.145   | 0.056 | 7.093   | 7.204   |
| 4216 | ENSG00000162873 | KLHDC8A | 1.4  | 0.006078  | 0.0246161 | 3.072   | 0.521 | 2.750   | 3.673   | 2.203   | 0.455 | 1.874   | 2.722   |
| 4218 | ENSG00000162755 | KLHDC9  | 1.1  | 0.1146899 | 0.235052  | 10.306  | 0.225 | 10.050  | 10.472  | 9.143   | 1.309 | 7.762   | 10.366  |
| 4221 | ENSG00000117153 | KLHL12  | 1.1  | 0.0004043 | 0.0028141 | 66.369  | 2.005 | 64.803  | 68.629  | 59.643  | 3.925 | 56.404  | 64.009  |
| 4222 | ENSG00000187961 | KLHL17  | -1.4 | 5.881E-05 | 0.0005852 | 10.105  | 1.202 | 9.259   | 11.481  | 13.980  | 1.640 | 12.259  | 15.525  |
| 4223 | ENSG00000114648 | KLHL18  | 1.2  | 0.0016938 | 0.0089437 | 7.904   | 0.313 | 7.656   | 8.256   | 6.767   | 0.327 | 6.402   | 7.035   |
| 4224 | ENSG00000109466 | KLHL2   | 1.1  | 0.0122316 | 0.0429287 | 13.727  | 0.773 | 12.907  | 14.442  | 12.202  | 0.767 | 11.511  | 13.027  |
| 4225 | ENSG00000162413 | KLHL21  | 1.2  | 0.0070868 | 0.0277773 | 10.780  | 0.803 | 10.168  | 11.689  | 9.561   | 1.030 | 8.371   | 10.181  |
| 4226 | ENSG00000213160 | KLHL23  | -1.1 | 0.0295317 | 0.0852337 | 49.384  | 1.619 | 47.571  | 50.686  | 54.362  | 2.143 | 52.969  | 56.831  |
| 4228 | ENSG00000183655 | KLHL25  | -1.1 | 0.0999792 | 0.2132344 | 7.928   | 0.496 | 7.429   | 8.420   | 8.910   | 1.110 | 7.895   | 10.096  |
| 4229 | ENSG00000146021 | KLHL3   | 1.1  | 0.1000245 | 0.2132772 | 4.641   | 0.218 | 4.484   | 4.889   | 4.336   | 0.164 | 4.238   | 4.525   |
| 4231 | ENSG00000102271 | KLHL4   | 1.1  | 0.0352258 | 0.0973579 | 36.436  | 4.834 | 32.291  | 41.746  | 33.905  | 0.572 | 33.245  | 34.274  |
| 4233 | ENSG00000087448 | KLHL42  | 1.3  | 5.571E-07 | 1.182E-05 | 23.366  | 0.915 | 22.393  | 24.210  | 19.091  | 0.833 | 18.283  | 19.947  |

|      | A               | B        | C    | D         | E         | F       | G     | H       | I       | J       | K      | L       | M       |
|------|-----------------|----------|------|-----------|-----------|---------|-------|---------|---------|---------|--------|---------|---------|
| 4234 | ENSG00000109790 | KLHL5    | 1.1  | 0.0027127 | 0.0130194 | 27.124  | 0.569 | 26.595  | 27.726  | 24.240  | 1.337  | 22.925  | 25.598  |
| 4235 | ENSG00000167748 | KLK1     | -1.6 | 0.0319092 | 0.0906111 | 0.831   | 0.132 | 0.683   | 0.940   | 1.373   | 0.629  | 0.912   | 2.090   |
| 4237 | ENSG00000164344 | KLKB1    | -1.1 | 0.0299012 | 0.086036  | 10.951  | 0.442 | 10.606  | 11.450  | 12.834  | 0.389  | 12.446  | 13.224  |
| 4242 | ENSG00000256667 | KLRA1P   | -1.8 | 1.113E-07 | 2.989E-06 | 5.043   | 0.889 | 4.266   | 6.013   | 9.305   | 1.180  | 8.530   | 10.664  |
| 4243 | ENSG00000139187 | KLRG1    | 1.3  | 0.0671517 | 0.1588664 | 2.335   | 0.718 | 1.548   | 2.955   | 1.806   | 0.308  | 1.505   | 2.120   |
| 4244 | ENSG00000188883 | KLRG2    | -1.1 | 0.0392258 | 0.1053727 | 18.206  | 0.956 | 17.282  | 19.191  | 21.096  | 1.751  | 19.156  | 22.560  |
| 4245 | ENSG00000118058 | KMT2A    | -1.1 | 0.0103694 | 0.0375622 | 17.511  | 0.356 | 17.292  | 17.922  | 19.315  | 0.256  | 19.021  | 19.485  |
| 4247 | ENSG00000272333 | KMT2B    | -1.2 | 0.0002389 | 0.0018431 | 12.533  | 0.419 | 12.267  | 13.016  | 14.972  | 0.738  | 14.413  | 15.809  |
| 4249 | ENSG00000055609 | KMT2C    | -1.1 | 0.0001296 | 0.0011176 | 10.616  | 0.447 | 10.276  | 11.123  | 12.466  | 0.442  | 12.132  | 12.967  |
| 4252 | ENSG00000167548 | KMT2D    | -1.1 | 0.0043881 | 0.0191032 | 17.509  | 0.921 | 16.491  | 18.283  | 19.978  | 1.623  | 18.764  | 21.822  |
| 4253 | ENSG00000005483 | KMT2E    | -1.1 | 0.0485539 | 0.1241973 | 19.955  | 0.519 | 19.593  | 20.550  | 21.824  | 0.682  | 21.128  | 22.490  |
| 4254 | ENSG00000183955 | KMT5A    | 1.1  | 0.106817  | 0.2236462 | 8.635   | 0.329 | 8.410   | 9.012   | 8.032   | 0.366  | 7.648   | 8.376   |
| 4255 | ENSG00000110066 | KMT5B    | -1.2 | 6.796E-05 | 0.0006594 | 19.058  | 0.978 | 18.250  | 20.145  | 22.768  | 0.482  | 22.363  | 23.300  |
| 4256 | ENSG00000133247 | KMT5C    | -1.2 | 0.0005201 | 0.0034603 | 19.000  | 0.186 | 18.800  | 19.167  | 22.889  | 1.760  | 21.222  | 24.729  |
| 4257 | ENSG00000171798 | KNDC1    | 1.2  | 0.0017201 | 0.0090572 | 10.320  | 0.433 | 9.855   | 10.713  | 8.928   | 0.520  | 8.339   | 9.323   |
| 4258 | ENSG00000137812 | KNL1     | -1.1 | 0.028408  | 0.082754  | 16.563  | 1.659 | 15.073  | 18.351  | 18.485  | 0.876  | 17.477  | 19.058  |
| 4260 | ENSG00000103550 | KNOP1    | -1.1 | 0.030395  | 0.0871033 | 39.675  | 1.244 | 38.528  | 40.997  | 43.251  | 1.048  | 42.442  | 44.435  |
| 4261 | ENSG00000128944 | KNSTRN   | -1.2 | 5.073E-06 | 7.526E-05 | 50.244  | 2.453 | 47.419  | 51.834  | 61.606  | 3.877  | 57.377  | 64.992  |
| 4262 | ENSG00000184445 | KNTC1    | -1.1 | 0.019719  | 0.0623029 | 28.500  | 1.623 | 26.843  | 30.086  | 31.314  | 0.282  | 31.046  | 31.609  |
| 4264 | ENSG00000114030 | KPNA1    | -1.1 | 0.0611623 | 0.1478402 | 27.090  | 0.484 | 26.620  | 27.586  | 29.536  | 1.785  | 27.565  | 31.043  |
| 4265 | ENSG00000182481 | KPNA2    | -1.2 | 5.23E-10  | 2.747E-08 | 671.794 | 9.808 | 661.837 | 681.446 | 837.331 | 40.800 | 794.055 | 875.093 |
| 4268 | ENSG00000102753 | KPNA3    | -1.1 | 0.0048579 | 0.0207009 | 65.795  | 3.293 | 62.171  | 68.603  | 74.014  | 1.621  | 72.589  | 75.778  |
| 4269 | ENSG00000196911 | KPNA5    | -1.3 | 2.738E-07 | 6.495E-06 | 7.288   | 0.378 | 6.900   | 7.656   | 9.988   | 0.997  | 9.018   | 11.009  |
| 4272 | ENSG00000025800 | KPNA6    | -1.1 | 0.0720096 | 0.1674086 | 47.642  | 1.265 | 46.859  | 49.102  | 51.400  | 2.819  | 48.147  | 53.130  |
| 4273 | ENSG00000133703 | KRAS     | -1.2 | 8.068E-06 | 0.0001109 | 61.685  | 0.543 | 61.356  | 62.312  | 73.036  | 2.307  | 71.056  | 75.570  |
| 4274 | ENSG00000131650 | KREMEN2  | 1.4  | 0.0002248 | 0.0017531 | 10.500  | 0.758 | 9.689   | 11.191  | 7.838   | 0.948  | 7.129   | 8.915   |
| 4275 | ENSG00000129347 | KRI1     | -1.1 | 0.0548949 | 0.136535  | 14.615  | 0.950 | 13.573  | 15.432  | 16.470  | 0.931  | 15.871  | 17.543  |
| 4277 | ENSG00000111057 | KRT18    | 1.3  | 3.413E-10 | 1.911E-08 | 229.563 | 9.276 | 223.964 | 240.270 | 184.756 | 6.261  | 180.998 | 191.983 |
| 4278 | ENSG00000214207 | KRT18P10 | 1.4  | 0.0682629 | 0.1607321 | 2.737   | 0.248 | 2.525   | 3.010   | 1.962   | 0.714  | 1.146   | 2.471   |
| 4280 | ENSG00000213943 | KRT18P17 | 1.3  | 0.0719477 | 0.1672879 | 7.036   | 0.940 | 6.057   | 7.932   | 5.638   | 0.916  | 4.748   | 6.577   |
| 4281 | ENSG00000213958 | KRT18P29 | 1.5  | 0.0115197 | 0.0408456 | 4.776   | 0.321 | 4.430   | 5.063   | 3.263   | 0.744  | 2.407   | 3.759   |
| 4282 | ENSG00000171345 | KRT19    | -1.1 | 0.1094183 | 0.2275692 | 78.139  | 3.212 | 75.261  | 81.604  | 85.215  | 2.703  | 82.122  | 87.123  |
| 4283 | ENSG00000135480 | KRT7     | -1.9 | 1.095E-09 | 5.278E-08 | 4.248   | 0.659 | 3.643   | 4.950   | 8.344   | 1.090  | 7.176   | 9.334   |
| 4284 | ENSG00000170421 | KRT8     | 1.1  | 0.0141185 | 0.0480939 | 113.321 | 3.048 | 110.763 | 116.693 | 107.821 | 3.252  | 105.579 | 111.551 |
| 4285 | ENSG00000229320 | KRT8P12  | 1.2  | 0.0717654 | 0.1669556 | 9.264   | 1.029 | 8.083   | 9.971   | 8.044   | 1.046  | 6.848   | 8.786   |
| 4286 | ENSG00000250539 | KRT8P33  | 1.2  | 0.0266685 | 0.0787301 | 10.133  | 0.428 | 9.685   | 10.538  | 8.412   | 0.182  | 8.204   | 8.541   |
| 4287 | ENSG00000213771 | KRT8P37  | 1.3  | 0.1230773 | 0.2475935 | 3.400   | 0.430 | 2.931   | 3.777   | 2.690   | 0.293  | 2.377   | 2.958   |
| 4288 | ENSG00000163463 | KRTCAP2  | -1.3 | 0.0018265 | 0.0094789 | 5.137   | 0.460 | 4.631   | 5.530   | 6.766   | 0.345  | 6.368   | 6.982   |
| 4289 | ENSG00000157992 | KRTCAP3  | 1.1  | 0.1231631 | 0.2476587 | 31.561  | 2.486 | 29.839  | 34.412  | 29.237  | 2.694  | 26.169  | 31.213  |
| 4290 | ENSG00000171435 | KSR2     | -1.6 | 0.0001344 | 0.0011503 | 0.584   | 0.176 | 0.428   | 0.774   | 0.935   | 0.061  | 0.872   | 0.993   |
| 4292 | ENSG00000126777 | KTN1     | 1.1  | 0.0834369 | 0.1875057 | 43.323  | 1.084 | 42.496  | 44.550  | 41.567  | 2.190  | 39.238  | 43.585  |
| 4295 | ENSG00000105700 | KXD1     | -1.1 | 0.0218063 | 0.0674947 | 61.190  | 0.600 | 60.576  | 61.775  | 66.985  | 1.551  | 65.342  | 68.425  |
| 4296 | ENSG00000171097 | KYAT1    | 1.1  | 0.1071968 | 0.2242725 | 22.247  | 1.346 | 20.995  | 23.670  | 21.101  | 0.870  | 20.124  | 21.794  |

|      | A               | B           | C    | D         | E         | F       | G      | H       | I       | J       | K     | L       | M       |
|------|-----------------|-------------|------|-----------|-----------|---------|--------|---------|---------|---------|-------|---------|---------|
| 4297 | ENSG00000137944 | KYAT3       | 1.1  | 0.0470722 | 0.1213247 | 88.869  | 1.568  | 87.068  | 89.934  | 84.693  | 5.847 | 78.335  | 89.839  |
| 4298 | ENSG00000240563 | L1TD1       | 1.2  | 0.00144   | 0.0078211 | 534.219 | 18.868 | 512.464 | 546.121 | 469.492 | 9.517 | 459.737 | 478.753 |
| 4299 | ENSG00000185513 | L3MBTL1     | -1.1 | 0.037675  | 0.1021641 | 6.434   | 0.441  | 5.993   | 6.875   | 7.288   | 0.412 | 6.926   | 7.736   |
| 4300 | ENSG00000100395 | L3MBTL2     | 1.2  | 0.0001504 | 0.0012617 | 12.890  | 0.581  | 12.222  | 13.280  | 10.757  | 0.880 | 9.753   | 11.395  |
| 4302 | ENSG00000154655 | L3MBTL4     | 1.6  | 0.0004704 | 0.0031825 | 1.520   | 0.151  | 1.355   | 1.651   | 0.940   | 0.340 | 0.608   | 1.288   |
| 4304 | ENSG00000103642 | LACTB       | -1.2 | 0.0001066 | 0.0009501 | 10.863  | 0.345  | 10.540  | 11.226  | 13.881  | 0.748 | 13.020  | 14.369  |
| 4306 | ENSG00000147592 | LACTB2      | 1.1  | 0.0171261 | 0.0558745 | 31.708  | 0.829  | 30.833  | 32.482  | 28.439  | 3.059 | 24.946  | 30.642  |
| 4307 | ENSG00000159166 | LAD1        | 1.2  | 0.0065112 | 0.0259544 | 20.247  | 1.729  | 19.081  | 22.233  | 17.683  | 1.375 | 16.814  | 19.269  |
| 4308 | ENSG00000089692 | LAG3        | -1.5 | 0.0086445 | 0.0324035 | 1.649   | 0.308  | 1.305   | 1.901   | 2.508   | 0.222 | 2.287   | 2.730   |
| 4310 | ENSG00000101680 | LAMA1       | -1.1 | 0.0004694 | 0.0031769 | 24.682  | 0.643  | 23.950  | 25.156  | 28.116  | 1.554 | 26.516  | 29.620  |
| 4313 | ENSG00000196569 | LAMA2       | -1.2 | 0.0308937 | 0.0883058 | 2.377   | 0.083  | 2.282   | 2.430   | 2.902   | 0.182 | 2.692   | 3.009   |
| 4314 | ENSG00000112769 | LAMA4       | -1.4 | 0.0437744 | 0.1146595 | 0.341   | 0.044  | 0.296   | 0.383   | 0.472   | 0.013 | 0.461   | 0.486   |
| 4316 | ENSG00000130702 | LAMA5       | -1.2 | 1.655E-05 | 0.0002018 | 38.985  | 1.345  | 37.709  | 40.390  | 47.911  | 4.421 | 44.667  | 52.946  |
| 4319 | ENSG00000091136 | LAMB1       | -1.2 | 1.356E-06 | 2.456E-05 | 34.007  | 1.158  | 33.128  | 35.320  | 41.550  | 0.824 | 40.599  | 42.050  |
| 4320 | ENSG00000135862 | LAMC1       | 1.1  | 2.003E-05 | 0.0002382 | 132.369 | 2.365  | 129.817 | 134.488 | 120.408 | 2.954 | 117.020 | 122.444 |
| 4324 | ENSG00000058085 | LAMC2       | 1.2  | 0.000586  | 0.0038117 | 10.736  | 0.724  | 10.042  | 11.486  | 9.222   | 0.099 | 9.131   | 9.328   |
| 4326 | ENSG00000050555 | LAMC3       | 1.2  | 0.001097  | 0.0063407 | 6.873   | 0.548  | 6.241   | 7.218   | 5.814   | 0.394 | 5.516   | 6.261   |
| 4327 | ENSG00000185896 | LAMP1       | 1.2  | 1.429E-08 | 5.068E-07 | 80.383  | 0.975  | 79.649  | 81.489  | 67.125  | 2.105 | 65.134  | 69.329  |
| 4328 | ENSG00000005893 | LAMP2       | 1.1  | 0.0016701 | 0.008849  | 44.076  | 0.829  | 43.177  | 44.809  | 39.922  | 2.919 | 36.647  | 42.250  |
| 4329 | ENSG00000149357 | LAMTOR1     | 1.2  | 2.016E-06 | 3.409E-05 | 65.065  | 0.721  | 64.356  | 65.797  | 54.896  | 2.554 | 52.866  | 57.763  |
| 4330 | ENSG00000109270 | LAMTOR3     | 1.1  | 0.0253339 | 0.0757153 | 25.287  | 2.098  | 22.915  | 26.902  | 23.336  | 1.684 | 22.233  | 25.274  |
| 4332 | ENSG00000188186 | LAMTOR4     | -1.2 | 0.000207  | 0.0016349 | 70.009  | 1.240  | 68.713  | 71.183  | 83.260  | 4.778 | 77.754  | 86.313  |
| 4334 | ENSG00000224699 | LAMTOR5-AS1 | -1.3 | 0.0153493 | 0.0513964 | 1.180   | 0.112  | 1.057   | 1.278   | 1.508   | 0.024 | 1.482   | 1.527   |
| 4335 | ENSG00000115365 | LANCL1      | 1.1  | 0.0041962 | 0.0184357 | 78.860  | 1.166  | 78.094  | 80.201  | 74.188  | 0.797 | 73.692  | 75.108  |
| 4336 | ENSG00000002549 | LAP3        | 1.2  | 7.896E-07 | 1.564E-05 | 38.745  | 1.440  | 37.558  | 40.346  | 31.666  | 1.889 | 29.784  | 33.563  |
| 4339 | ENSG00000213500 | LAP3P2      | 1.5  | 0.0680112 | 0.1603296 | 1.790   | 0.495  | 1.439   | 2.357   | 1.189   | 0.388 | 0.753   | 1.495   |
| 4340 | ENSG00000104341 | LAPTM4B     | -1.1 | 0.0365224 | 0.099952  | 344.809 | 7.379  | 336.299 | 349.432 | 371.397 | 8.804 | 365.251 | 381.482 |
| 4341 | ENSG00000133424 | LARGE1      | 1.1  | 0.0039853 | 0.0177142 | 21.734  | 0.473  | 21.414  | 22.277  | 19.983  | 1.543 | 18.817  | 21.732  |
| 4343 | ENSG00000165905 | LARGE2      | -1.1 | 0.002437  | 0.0119021 | 54.691  | 2.343  | 52.375  | 57.059  | 62.832  | 2.504 | 61.322  | 65.723  |
| 4346 | ENSG00000155506 | LARP1       | 1.1  | 0.0020159 | 0.0102172 | 185.176 | 9.993  | 173.637 | 191.074 | 173.797 | 4.208 | 170.090 | 178.371 |
| 4348 | ENSG00000161813 | LARP4       | 1.1  | 0.000905  | 0.005378  | 45.742  | 2.513  | 43.454  | 48.432  | 41.507  | 0.197 | 41.288  | 41.670  |
| 4350 | ENSG00000107929 | LARP4B      | -1.1 | 0.0443136 | 0.1157724 | 18.436  | 0.422  | 18.036  | 18.876  | 20.064  | 0.425 | 19.576  | 20.348  |
| 4351 | ENSG00000166173 | LARP6       | 1.3  | 8.988E-05 | 0.0008284 | 11.095  | 0.564  | 10.481  | 11.590  | 8.935   | 0.468 | 8.444   | 9.377   |
| 4352 | ENSG00000174720 | LARP7       | -1.2 | 4.322E-06 | 6.538E-05 | 30.414  | 1.472  | 28.991  | 31.930  | 38.208  | 1.108 | 36.990  | 39.157  |
| 4354 | ENSG00000133706 | LARS        | 1.1  | 0.0004864 | 0.0032776 | 144.490 | 1.206  | 143.489 | 145.829 | 134.960 | 1.267 | 133.954 | 136.382 |
| 4358 | ENSG00000002834 | LASP1       | 1.1  | 6.358E-05 | 0.0006249 | 91.269  | 1.755  | 89.494  | 93.004  | 82.055  | 6.239 | 75.478  | 87.890  |
| 4359 | ENSG00000131023 | LATS1       | -1.1 | 0.055369  | 0.1373707 | 10.876  | 0.228  | 10.618  | 11.052  | 12.073  | 0.330 | 11.871  | 12.454  |
| 4360 | ENSG00000150457 | LATS2       | -1.2 | 0.0002517 | 0.0019199 | 21.544  | 0.156  | 21.394  | 21.705  | 25.658  | 1.634 | 23.777  | 26.721  |
| 4363 | ENSG00000213626 | LBH         | 1.1  | 0.0519049 | 0.130674  | 14.242  | 1.031  | 13.055  | 14.921  | 13.228  | 0.598 | 12.795  | 13.910  |
| 4366 | ENSG00000143815 | LBR         | 1.1  | 0.001255  | 0.0070469 | 65.603  | 2.939  | 62.490  | 68.332  | 60.422  | 1.623 | 58.758  | 62.000  |
| 4368 | ENSG00000157578 | LCA5L       | 1.5  | 0.0647165 | 0.1542488 | 0.473   | 0.056  | 0.408   | 0.506   | 0.319   | 0.095 | 0.214   | 0.399   |
| 4370 | ENSG00000213398 | LCAT        | 1.3  | 0.003416  | 0.0156402 | 8.010   | 0.744  | 7.151   | 8.442   | 6.329   | 0.592 | 5.857   | 6.993   |

|      | A               | B          | C    | D         | E         | F        | G     | H        | I        | J        | K      | L        | M        |
|------|-----------------|------------|------|-----------|-----------|----------|-------|----------|----------|----------|--------|----------|----------|
| 4371 | ENSG00000182866 | LCK        | -1.1 | 0.1081118 | 0.2256797 | 46.964   | 1.749 | 45.043   | 48.463   | 50.771   | 2.154  | 48.732   | 53.023   |
| 4372 | ENSG00000136167 | LCP1       | 5.5  | 4.15E-24  | 7.81E-21  | 15.403   | 1.021 | 14.791   | 16.581   | 2.847    | 0.505  | 2.534    | 3.429    |
| 4373 | ENSG00000188501 | LCTL       | 1.3  | 0.0050452 | 0.021289  | 7.367    | 0.398 | 7.030    | 7.806    | 5.953    | 0.495  | 5.455    | 6.445    |
| 4377 | ENSG00000169744 | LDB2       | -1.2 | 1.432E-05 | 0.0001802 | 24.504   | 2.649 | 22.430   | 27.488   | 30.875   | 1.217  | 29.803   | 32.198   |
| 4378 | ENSG00000122367 | LDB3       | 1.7  | 0.0070677 | 0.0277282 | 0.858    | 0.081 | 0.803    | 0.951    | 0.518    | 0.147  | 0.351    | 0.628    |
| 4379 | ENSG00000134333 | LDHA       | -1.7 | 7.65E-05  | 0.0007254 | 92.526   | 2.258 | 90.666   | 95.038   | 159.270  | 27.947 | 135.135  | 189.890  |
| 4380 | ENSG00000235674 | LDHAP2     | -2   | 0.0040403 | 0.017907  | 1.353    | 0.220 | 1.134    | 1.575    | 2.723    | 0.696  | 1.920    | 3.153    |
| 4381 | ENSG00000236090 | LDHAP3     | -1.9 | 0.0012342 | 0.0069511 | 2.316    | 0.972 | 1.330    | 3.273    | 4.472    | 0.327  | 4.112    | 4.750    |
| 4383 | ENSG00000214110 | LDHAP4     | -1.7 | 1.997E-09 | 9.129E-08 | 26.504   | 1.689 | 24.781   | 28.158   | 45.984   | 7.004  | 39.994   | 53.686   |
| 4384 | ENSG00000235847 | LDHAP7     | -1.9 | 0.0033839 | 0.0155142 | 2.245    | 0.961 | 1.198    | 3.088    | 4.290    | 1.054  | 3.566    | 5.499    |
| 4387 | ENSG00000111716 | LDHB       | -1   | 0.0402933 | 0.107591  | 1130.378 | 3.053 | 1127.339 | 1133.445 | 1210.941 | 37.333 | 1173.383 | 1248.046 |
| 4388 | ENSG00000166816 | LDHD       | 1.2  | 0.0256448 | 0.0764406 | 13.190   | 1.595 | 11.454   | 14.589   | 11.313   | 1.411  | 9.692    | 12.265   |
| 4389 | ENSG00000130164 | LDLR       | 1.6  | 4.37E-16  | 1.09E-13  | 43.168   | 2.154 | 41.703   | 45.641   | 27.809   | 2.291  | 26.169   | 30.427   |
| 4390 | ENSG00000243709 | LEFTY1     | 2.4  | 0.0480881 | 0.1232493 | 0.418    | 0.239 | 0.156    | 0.625    | 0.166    | 0.140  | 0.083    | 0.329    |
| 4392 | ENSG00000143768 | LEFTY2     | 2.3  | 0.0028341 | 0.0134456 | 0.826    | 0.102 | 0.710    | 0.903    | 0.365    | 0.090  | 0.279    | 0.458    |
| 4393 | ENSG00000186007 | LEMD1      | 1.3  | 0.03663   | 0.1002301 | 6.353    | 0.730 | 5.841    | 7.189    | 5.180    | 0.557  | 4.554    | 5.619    |
| 4394 | ENSG00000161904 | LEMD2      | 1.2  | 2.322E-05 | 0.0002701 | 35.704   | 0.946 | 35.008   | 36.781   | 31.017   | 1.759  | 28.987   | 32.084   |
| 4395 | ENSG00000174106 | LEMD3      | 1.1  | 0.1052497 | 0.2211524 | 21.599   | 0.680 | 20.851   | 22.179   | 20.808   | 0.421  | 20.494   | 21.286   |
| 4396 | ENSG00000167615 | LENG8      | -1.3 | 9.369E-09 | 3.521E-07 | 52.743   | 1.463 | 51.473   | 54.343   | 67.973   | 1.387  | 66.713   | 69.460   |
| 4398 | ENSG00000275183 | LENG9      | -1.3 | 0.0584876 | 0.1428035 | 2.860    | 0.350 | 2.545    | 3.236    | 3.823    | 0.368  | 3.566    | 4.245    |
| 4403 | ENSG00000166477 | LEO1       | -1.1 | 0.0021052 | 0.0105652 | 35.464   | 1.524 | 34.174   | 37.145   | 41.554   | 2.092  | 39.767   | 43.855   |
| 4404 | ENSG00000213625 | LEPROT     | 1.4  | 1.013E-08 | 3.79E-07  | 26.954   | 1.097 | 25.831   | 28.023   | 20.219   | 1.311  | 19.442   | 21.733   |
| 4405 | ENSG00000165046 | LETM2      | -1.3 | 0.0733969 | 0.1698402 | 0.808    | 0.082 | 0.749    | 0.902    | 1.069    | 0.131  | 0.921    | 1.168    |
| 4406 | ENSG00000050426 | LETMD1     | -1.2 | 0.0001507 | 0.0012627 | 17.344   | 0.929 | 16.533   | 18.358   | 21.139   | 1.213  | 19.747   | 21.968   |
| 4410 | ENSG00000106003 | LFNG       | 1.1  | 0.009958  | 0.0363209 | 25.395   | 1.222 | 24.233   | 26.669   | 22.800   | 0.609  | 22.118   | 23.291   |
| 4411 | ENSG00000100097 | LGALS1     | 1.2  | 0.0002084 | 0.0016452 | 77.542   | 3.259 | 74.427   | 80.927   | 64.454   | 1.578  | 63.475   | 66.274   |
| 4415 | ENSG00000131981 | LGALS3     | 1.4  | 0.0008656 | 0.0051987 | 6.945    | 1.151 | 6.164    | 8.267    | 5.004    | 0.180  | 4.804    | 5.155    |
| 4416 | ENSG00000108679 | LGALS3BP   | 1.2  | 0.0006341 | 0.0040556 | 39.043   | 1.183 | 37.694   | 39.903   | 33.612   | 3.203  | 31.112   | 37.223   |
| 4418 | ENSG00000116977 | LGALS8     | 1.2  | 7.515E-05 | 0.0007165 | 9.193    | 0.114 | 9.083    | 9.312    | 7.713    | 0.345  | 7.476    | 8.109    |
| 4420 | ENSG00000119862 | LGALSL     | -1.1 | 0.0261358 | 0.0775499 | 30.663   | 0.693 | 29.986   | 31.371   | 34.438   | 2.968  | 31.386   | 37.313   |
| 4421 | ENSG00000153902 | LGI4       | -1.3 | 0.0005176 | 0.0034519 | 7.213    | 0.454 | 6.711    | 7.594    | 9.311    | 0.305  | 9.022    | 9.629    |
| 4425 | ENSG00000205213 | LGR4       | -1.2 | 5.616E-08 | 1.652E-06 | 42.622   | 1.647 | 41.033   | 44.322   | 53.887   | 2.931  | 50.856   | 56.706   |
| 4426 | ENSG00000183722 | LHFP       | 1.3  | 0.0044098 | 0.0191928 | 6.028    | 0.869 | 5.079    | 6.787    | 4.587    | 0.225  | 4.405    | 4.839    |
| 4427 | ENSG00000182508 | LHFPL1     | 1.2  | 0.0691469 | 0.1623153 | 7.280    | 0.502 | 6.749    | 7.747    | 6.220    | 0.186  | 6.103    | 6.435    |
| 4429 | ENSG00000145685 | LHFPL2     | 1.1  | 0.0090717 | 0.0336321 | 18.932   | 0.865 | 18.266   | 19.910   | 17.438   | 0.682  | 16.840   | 18.180   |
| 4430 | ENSG00000226869 | LHFPL3-AS1 | 1.6  | 0.0040632 | 0.0179755 | 1.815    | 0.324 | 1.447    | 2.058    | 1.137    | 0.167  | 0.953    | 1.280    |
| 4432 | ENSG00000156959 | LHFPL4     | 1.2  | 0.0015112 | 0.0081399 | 11.461   | 0.282 | 11.193   | 11.755   | 9.735    | 1.279  | 8.988    | 11.211   |
| 4434 | ENSG00000121454 | LHX4       | -1.7 | 0.0079321 | 0.0304209 | 0.415    | 0.170 | 0.293    | 0.609    | 0.748    | 0.165  | 0.564    | 0.881    |
| 4435 | ENSG00000162624 | LHX8       | 1.8  | 0.0067562 | 0.0267355 | 0.906    | 0.151 | 0.742    | 1.040    | 0.503    | 0.182  | 0.294    | 0.629    |
| 4439 | ENSG00000105486 | LIG1       | 1.1  | 0.0019549 | 0.0099891 | 33.541   | 1.900 | 31.388   | 34.980   | 30.618   | 1.067  | 29.921   | 31.846   |
| 4440 | ENSG00000050405 | LIMA1      | 1.2  | 0.000133  | 0.0011409 | 47.754   | 1.989 | 45.904   | 49.858   | 42.210   | 3.413  | 39.876   | 46.127   |
| 4441 | ENSG00000064042 | LIMCH1     | 1.5  | 1.506E-07 | 3.894E-06 | 4.192    | 0.448 | 3.684    | 4.526    | 2.803    | 0.220  | 2.674    | 3.057    |

|      | A               | B             | C    | D         | E         | F       | G     | H      | I       | J       | K     | L       | M       |
|------|-----------------|---------------|------|-----------|-----------|---------|-------|--------|---------|---------|-------|---------|---------|
| 4442 | ENSG00000144791 | LIMD1         | -1.1 | 0.0409957 | 0.1089163 | 9.716   | 0.471 | 9.425  | 10.259  | 10.733  | 0.378 | 10.428  | 11.156  |
| 4443 | ENSG00000230530 | LIMD1-<br>AS1 | -1.9 | 6.313E-05 | 0.0006211 | 2.856   | 0.321 | 2.504  | 3.132   | 5.442   | 0.781 | 4.609   | 6.157   |
| 4445 | ENSG00000106683 | LIMK1         | 1.1  | 0.0168135 | 0.0551739 | 38.128  | 1.093 | 37.050 | 39.236  | 35.827  | 2.342 | 33.791  | 38.386  |
| 4447 | ENSG00000169756 | LIMS1         | 1.1  | 0.0221077 | 0.0681157 | 18.410  | 0.702 | 17.600 | 18.841  | 17.193  | 1.180 | 16.101  | 18.444  |
| 4448 | ENSG00000187772 | LIN28B        | -1.1 | 5.687E-05 | 0.0005691 | 102.255 | 3.983 | 97.659 | 104.689 | 118.726 | 3.615 | 114.824 | 121.960 |
| 4450 | ENSG00000148943 | LIN7C         | -1.1 | 0.0635529 | 0.1522189 | 19.380  | 1.247 | 17.963 | 20.314  | 22.393  | 2.968 | 19.446  | 25.382  |
| 4452 | ENSG00000183814 | LIN9          | -1.1 | 0.0286881 | 0.0833538 | 12.936  | 0.707 | 12.142 | 13.495  | 14.870  | 1.153 | 13.845  | 16.118  |
| 4457 | ENSG00000236871 | LINC00106     | -1.9 | 0.0015338 | 0.0082512 | 5.331   | 2.498 | 3.020  | 7.981   | 10.317  | 0.969 | 9.444   | 11.360  |
| 4459 | ENSG00000175701 | LINC00116     | 1.1  | 0.0460249 | 0.1191641 | 13.210  | 0.722 | 12.765 | 14.044  | 11.746  | 0.281 | 11.438  | 11.988  |
| 4460 | ENSG00000196668 | LINC00173     | -1.5 | 0.0011207 | 0.006456  | 4.016   | 0.414 | 3.607  | 4.436   | 6.008   | 0.660 | 5.576   | 6.768   |
| 4463 | ENSG00000188185 | LINC00265     | -1.2 | 0.0472164 | 0.1215763 | 7.466   | 0.742 | 6.709  | 8.192   | 8.860   | 0.878 | 7.856   | 9.487   |
| 4465 | ENSG00000181798 | LINC00471     | 1.4  | 0.0161035 | 0.0534353 | 5.470   | 0.490 | 4.952  | 5.927   | 3.930   | 0.258 | 3.645   | 4.148   |
| 4473 | ENSG00000233237 | LINC00472     | 2.2  | 1.471E-05 | 0.0001835 | 2.152   | 0.239 | 1.974  | 2.423   | 1.009   | 0.219 | 0.857   | 1.260   |
| 4475 | ENSG00000225511 | LINC00475     | -1.5 | 0.0512151 | 0.1293389 | 0.639   | 0.382 | 0.270  | 1.033   | 1.006   | 0.227 | 0.765   | 1.216   |
| 4478 | ENSG00000250682 | LINC00491     | -1.4 | 0.0038349 | 0.0171495 | 5.808   | 1.058 | 4.816  | 6.921   | 8.568   | 0.963 | 7.619   | 9.544   |
| 4479 | ENSG00000264575 | LINC00526     | -1.2 | 0.0791146 | 0.1799684 | 7.922   | 1.356 | 6.357  | 8.741   | 9.550   | 0.253 | 9.259   | 9.702   |
| 4480 | ENSG00000236094 | LINC00545     | -1.3 | 0.010309  | 0.0373914 | 33.786  | 9.190 | 25.865 | 43.862  | 44.656  | 2.479 | 41.823  | 46.425  |
| 4481 | ENSG00000253230 | LINC00599     | -1.5 | 2.882E-08 | 9.338E-07 | 35.482  | 4.791 | 32.056 | 40.956  | 53.094  | 3.947 | 49.953  | 57.524  |
| 4483 | ENSG00000260941 | LINC00622     | 1.4  | 0.0949995 | 0.2059905 | 2.590   | 0.450 | 2.070  | 2.868   | 1.875   | 0.518 | 1.559   | 2.473   |
| 4484 | ENSG00000226067 | LINC00623     | 1.4  | 0.0015845 | 0.0084617 | 7.998   | 1.048 | 6.902  | 8.989   | 5.987   | 0.354 | 5.710   | 6.386   |
| 4486 | ENSG00000258441 | LINC00641     | 1.3  | 3.107E-06 | 4.925E-05 | 11.216  | 0.560 | 10.858 | 11.861  | 8.557   | 0.512 | 8.179   | 9.140   |
| 4489 | ENSG00000266904 | LINC00663     | -1.3 | 0.0358857 | 0.0986488 | 2.335   | 0.279 | 2.166  | 2.657   | 3.027   | 0.530 | 2.526   | 3.581   |
| 4491 | ENSG00000268658 | LINC00664     | 1.2  | 0.000753  | 0.0046325 | 12.463  | 0.676 | 11.771 | 13.121  | 10.628  | 0.647 | 9.947   | 11.234  |
| 4496 | ENSG00000263874 | LINC00672     | 1.7  | 0.0027466 | 0.0131523 | 1.257   | 0.154 | 1.080  | 1.361   | 0.749   | 0.029 | 0.715   | 0.768   |

|      | A               | B         | C    | D         | E         | F       | G     | H       | I       | J       | K     | L       | M       |
|------|-----------------|-----------|------|-----------|-----------|---------|-------|---------|---------|---------|-------|---------|---------|
| 4497 | ENSG00000237854 | LINC00674 | 1.7  | 0.0078565 | 0.0302061 | 7.464   | 2.116 | 5.837   | 9.856   | 4.541   | 1.386 | 3.622   | 6.136   |
| 4499 | ENSG00000244342 | LINC00698 | -1.1 | 0.1046254 | 0.22032   | 18.560  | 0.651 | 17.965  | 19.256  | 20.719  | 1.454 | 19.179  | 22.069  |
| 4500 | ENSG00000238266 | LINC00707 | 2    | 1.154E-07 | 3.088E-06 | 5.563   | 0.516 | 4.999   | 6.012   | 2.787   | 0.505 | 2.242   | 3.238   |
| 4502 | ENSG00000240024 | LINC00888 | 1.2  | 0.0017592 | 0.0092137 | 19.366  | 1.027 | 18.317  | 20.370  | 16.168  | 0.884 | 15.192  | 16.916  |
| 4503 | ENSG00000260802 | LINC00890 | 1.3  | 0.0021689 | 0.0107966 | 4.991   | 0.236 | 4.728   | 5.185   | 3.841   | 0.269 | 3.550   | 4.080   |
| 4504 | ENSG00000235703 | LINC00894 | -1.3 | 0.011935  | 0.0420358 | 1.605   | 0.122 | 1.506   | 1.741   | 2.122   | 0.122 | 1.993   | 2.235   |
| 4505 | ENSG00000246100 | LINC00900 | 1.5  | 0.0618482 | 0.148966  | 0.725   | 0.168 | 0.531   | 0.837   | 0.499   | 0.189 | 0.385   | 0.717   |
| 4507 | ENSG00000264247 | LINC00909 | 1.2  | 0.1003805 | 0.2137811 | 4.327   | 0.329 | 4.061   | 4.695   | 3.795   | 0.629 | 3.345   | 4.514   |
| 4508 | ENSG00000226091 | LINC00937 | 1.4  | 0.0186494 | 0.0596365 | 1.248   | 0.261 | 0.951   | 1.444   | 0.878   | 0.112 | 0.796   | 1.005   |
| 4511 | ENSG00000235884 | LINC00941 | 3.7  | 1.077E-09 | 5.206E-08 | 4.672   | 0.885 | 3.762   | 5.529   | 1.283   | 0.560 | 0.770   | 1.881   |
| 4513 | ENSG00000242516 | LINC00960 | 1.3  | 0.0161052 | 0.0534353 | 3.398   | 0.864 | 2.694   | 4.363   | 2.595   | 0.240 | 2.392   | 2.859   |
| 4514 | ENSG00000204054 | LINC00963 | 1.5  | 0.0013838 | 0.0075841 | 0.825   | 0.094 | 0.751   | 0.931   | 0.580   | 0.041 | 0.532   | 0.606   |
| 4517 | ENSG00000214194 | LINC00998 | 1.1  | 0.0350972 | 0.0971521 | 79.302  | 2.903 | 77.441  | 82.648  | 74.340  | 5.005 | 70.253  | 79.923  |
| 4518 | ENSG00000261455 | LINC01003 | 1.4  | 0.0709968 | 0.1655092 | 2.378   | 0.246 | 2.111   | 2.595   | 1.715   | 0.392 | 1.330   | 2.113   |
| 4525 | ENSG00000228393 | LINC01004 | 1.3  | 0.0514099 | 0.1296981 | 8.775   | 0.951 | 7.707   | 9.530   | 7.077   | 0.858 | 6.345   | 8.020   |
| 4526 | ENSG00000244041 | LINC01011 | -1.3 | 0.0147545 | 0.0497794 | 3.550   | 0.755 | 2.679   | 4.028   | 4.834   | 0.596 | 4.451   | 5.521   |
| 4528 | ENSG00000250337 | LINC01021 | -1.2 | 7.971E-05 | 0.0007506 | 130.130 | 8.712 | 122.780 | 139.753 | 158.615 | 9.632 | 149.825 | 168.911 |
| 4529 | ENSG00000212694 | LINC01089 | -1.1 | 0.0990763 | 0.2119769 | 12.157  | 1.337 | 11.120  | 13.665  | 13.655  | 0.973 | 12.642  | 14.583  |
| 4530 | ENSG00000215808 | LINC01139 | 1.7  | 0.0011664 | 0.0066578 | 5.138   | 1.500 | 3.941   | 6.820   | 3.153   | 0.459 | 2.627   | 3.475   |
| 4531 | ENSG00000256124 | LINC01152 | 1.7  | 0.0042622 | 0.0186705 | 1.266   | 0.286 | 0.956   | 1.520   | 0.769   | 0.108 | 0.657   | 0.872   |
| 4532 | ENSG00000232790 | LINC01162 | 1.3  | 0.1113753 | 0.2303926 | 10.940  | 2.614 | 7.932   | 12.665  | 8.559   | 0.902 | 7.643   | 9.447   |



|      | A               | B         | C    | D         | E         | F       | G     | H      | I       | J      | K     | L      | M      |
|------|-----------------|-----------|------|-----------|-----------|---------|-------|--------|---------|--------|-------|--------|--------|
| 4533 | ENSG00000245937 | LINC01184 | 1.3  | 0.0132126 | 0.0456331 | 2.756   | 0.382 | 2.328  | 3.063   | 2.234  | 0.304 | 1.922  | 2.530  |
| 4534 | ENSG00000248131 | LINC01194 | -1.3 | 0.0833825 | 0.1874084 | 2.189   | 0.366 | 1.911  | 2.604   | 2.952  | 0.364 | 2.591  | 3.320  |
| 4535 | ENSG00000269416 | LINC01224 | 1.1  | 0.0978063 | 0.2099236 | 27.987  | 1.481 | 27.101 | 29.698  | 26.555 | 1.435 | 24.912 | 27.564 |
| 4537 | ENSG00000280734 | LINC01232 | 1.4  | 0.0014581 | 0.0079014 | 2.837   | 0.353 | 2.429  | 3.055   | 2.125  | 0.185 | 1.917  | 2.270  |
| 4539 | ENSG00000249550 | LINC01234 | 1.3  | 0.0122935 | 0.043021  | 4.407   | 0.649 | 3.951  | 5.150   | 3.377  | 1.084 | 2.456  | 4.572  |
| 4541 | ENSG00000237940 | LINC01238 | -1.5 | 0.0082587 | 0.0313323 | 1.940   | 0.788 | 1.139  | 2.715   | 3.010  | 0.461 | 2.685  | 3.537  |
| 4543 | ENSG00000231532 | LINC01249 | 1.8  | 0.0050848 | 0.0214246 | 1.131   | 0.222 | 0.962  | 1.382   | 0.636  | 0.056 | 0.601  | 0.700  |
| 4545 | ENSG00000231742 | LINC01273 | 1.4  | 0.0469686 | 0.1210946 | 5.798   | 0.708 | 5.288  | 6.606   | 4.293  | 1.006 | 3.149  | 5.040  |
| 4546 | ENSG00000235437 | LINC01278 | 1.3  | 1.325E-05 | 0.0001695 | 12.848  | 0.106 | 12.775 | 12.970  | 10.367 | 0.317 | 10.126 | 10.726 |
| 4547 | ENSG00000250889 | LINC01336 | 2.1  | 0.0045741 | 0.0197502 | 3.361   | 0.637 | 2.981  | 4.096   | 1.614  | 0.263 | 1.371  | 1.894  |
| 4548 | ENSG00000261326 | LINC01355 | 1.3  | 0.0192055 | 0.0610197 | 2.984   | 0.366 | 2.685  | 3.392   | 2.407  | 0.170 | 2.268  | 2.596  |
| 4551 | ENSG00000215866 | LINC01356 | 1.8  | 2.38E-14  | 3.94E-12  | 104.857 | 6.941 | 97.737 | 111.604 | 60.135 | 5.221 | 54.223 | 64.112 |
| 4552 | ENSG00000253686 | LINC01484 | 2.3  | 0.0006699 | 0.0042306 | 1.386   | 0.383 | 0.944  | 1.627   | 0.623  | 0.025 | 0.607  | 0.652  |
| 4553 | ENSG00000213888 | LINC01521 | 1.5  | 0.0006867 | 0.0043081 | 8.930   | 0.696 | 8.128  | 9.385   | 6.233  | 1.689 | 4.466  | 7.833  |
| 4554 | ENSG00000272888 | LINC01578 | 1.1  | 0.0693292 | 0.1626078 | 27.305  | 1.066 | 26.163 | 28.275  | 26.005 | 0.683 | 25.216 | 26.417 |
| 4556 | ENSG00000250266 | LINC01612 | 4.1  | 1.389E-07 | 3.625E-06 | 13.905  | 3.081 | 11.025 | 17.154  | 3.383  | 1.396 | 2.334  | 4.967  |
| 4559 | ENSG00000233922 | LINC01694 | -1.2 | 0.0411426 | 0.1092377 | 2.486   | 0.401 | 2.144  | 2.927   | 3.076  | 0.414 | 2.805  | 3.553  |
| 4560 | ENSG00000233396 | LINC01719 | 1.2  | 0.0707508 | 0.1651178 | 6.482   | 0.909 | 5.821  | 7.519   | 5.537  | 0.866 | 5.006  | 6.536  |
| 4561 | ENSG00000234546 | LINC01759 | -1.3 | 0.0185299 | 0.0593441 | 5.998   | 1.077 | 5.110  | 7.196   | 7.966  | 0.857 | 7.008  | 8.657  |
| 4564 | ENSG00000225285 | LINC01770 | 1.7  | 0.0005611 | 0.0036783 | 9.747   | 1.213 | 8.507  | 10.930  | 5.752  | 1.342 | 4.227  | 6.752  |
| 4565 | ENSG00000225675 | LINC01771 | 1.8  | 0.0080862 | 0.0308648 | 5.743   | 1.693 | 4.204  | 7.556   | 3.159  | 1.166 | 2.060  | 4.382  |

|      | A               | B         | C    | D         | E         | F       | G     | H       | I       | J       | K     | L       | M       |
|------|-----------------|-----------|------|-----------|-----------|---------|-------|---------|---------|---------|-------|---------|---------|
| 4568 | ENSG00000227403 | LINC01806 | 1.3  | 0.0524776 | 0.1318803 | 2.919   | 0.163 | 2.733   | 3.040   | 2.224   | 0.410 | 1.755   | 2.515   |
| 4570 | ENSG00000236714 | LINC01844 | -1.8 | 3.244E-05 | 0.0003562 | 1.853   | 0.296 | 1.598   | 2.178   | 3.461   | 0.225 | 3.208   | 3.636   |
| 4571 | ENSG00000226383 | LINC01876 | -1.1 | 0.026496  | 0.0783164 | 14.617  | 0.501 | 14.089  | 15.085  | 17.004  | 0.888 | 16.308  | 18.004  |
| 4572 | ENSG00000220804 | LINC01881 | 1.5  | 0.00551   | 0.0227794 | 3.981   | 0.707 | 3.164   | 4.394   | 2.730   | 0.182 | 2.560   | 2.922   |
| 4574 | ENSG00000263146 | LINC01896 | -1.2 | 0.028854  | 0.0837495 | 9.354   | 1.241 | 8.098   | 10.580  | 11.561  | 0.091 | 11.466  | 11.649  |
| 4576 | ENSG00000249846 | LINC02021 | 1.6  | 0.0018419 | 0.0095376 | 3.573   | 0.278 | 3.293   | 3.849   | 2.231   | 0.490 | 1.665   | 2.518   |
| 4577 | ENSG00000220161 | LINC02076 | -1.3 | 0.1050717 | 0.2209471 | 1.992   | 0.151 | 1.831   | 2.131   | 2.640   | 0.114 | 2.532   | 2.759   |
| 4580 | ENSG00000262155 | LINC02175 | -1.5 | 0.0139252 | 0.0475696 | 1.896   | 0.278 | 1.576   | 2.066   | 2.865   | 0.181 | 2.669   | 3.026   |
| 4581 | ENSG00000204650 | LINC02210 | -1.1 | 0.0009701 | 0.0057188 | 7.955   | 0.413 | 7.620   | 8.416   | 9.305   | 0.320 | 8.947   | 9.563   |
| 4583 | ENSG00000259485 | LINC02253 | -1.2 | 0.092624  | 0.202292  | 9.946   | 0.427 | 9.490   | 10.338  | 12.342  | 2.061 | 10.800  | 14.682  |
| 4585 | ENSG00000238042 | LINC02257 | -1.4 | 0.0418528 | 0.1106394 | 3.014   | 0.645 | 2.548   | 3.750   | 4.390   | 0.471 | 3.851   | 4.720   |
| 4586 | ENSG00000261121 | LINC02473 | -2.3 | 0.0008807 | 0.0052689 | 0.674   | 0.200 | 0.475   | 0.875   | 1.624   | 0.126 | 1.496   | 1.749   |
| 4589 | ENSG00000169783 | LINGO1    | -1.2 | 0.000204  | 0.0016189 | 27.590  | 2.096 | 25.240  | 29.265  | 34.972  | 3.728 | 30.708  | 37.616  |
| 4590 | ENSG00000174482 | LINGO2    | -1.2 | 0.1079201 | 0.2254234 | 3.119   | 0.576 | 2.483   | 3.606   | 3.839   | 0.465 | 3.302   | 4.124   |
| 4591 | ENSG00000223784 | LINP1     | 3    | 0.0060499 | 0.0245259 | 1.720   | 1.184 | 0.812   | 3.059   | 0.570   | 0.420 | 0.182   | 1.016   |
| 4593 | ENSG00000107798 | LIPA      | 1.4  | 2.807E-09 | 1.218E-07 | 21.969  | 0.974 | 20.967  | 22.913  | 16.363  | 0.219 | 16.111  | 16.500  |
| 4598 | ENSG00000213904 | LIPE-AS1  | -1.4 | 0.0158695 | 0.0528036 | 1.420   | 0.166 | 1.263   | 1.593   | 2.029   | 0.224 | 1.896   | 2.288   |
| 4601 | ENSG00000101670 | LIPG      | 1.8  | 1.05E-11  | 8.843E-10 | 5.037   | 0.517 | 4.681   | 5.630   | 2.913   | 0.309 | 2.665   | 3.258   |
| 4605 | ENSG00000189067 | LITAF     | -1.1 | 0.0171959 | 0.0560357 | 67.228  | 6.123 | 61.655  | 73.782  | 74.817  | 1.523 | 73.219  | 76.252  |
| 4607 | ENSG00000074695 | LMAN1     | -1.2 | 6.543E-07 | 1.345E-05 | 91.968  | 3.415 | 88.099  | 94.561  | 111.439 | 5.570 | 105.109 | 115.590 |
| 4609 | ENSG00000169223 | LMAN2     | 1.1  | 0.074767  | 0.1721158 | 104.859 | 6.252 | 97.970  | 110.174 | 100.831 | 3.576 | 96.979  | 104.045 |
| 4610 | ENSG00000114988 | LMAN2L    | 1.1  | 0.0594985 | 0.1447287 | 22.544  | 1.304 | 21.474  | 23.996  | 20.921  | 0.288 | 20.695  | 21.246  |
| 4612 | ENSG00000105983 | LMBR1     | 1.1  | 0.0053577 | 0.0222716 | 15.766  | 0.214 | 15.563  | 15.990  | 14.659  | 0.429 | 14.172  | 14.979  |
| 4613 | ENSG00000139636 | LMBR1L    | -1.2 | 2.811E-05 | 0.0003165 | 15.008  | 0.189 | 14.894  | 15.226  | 18.753  | 0.223 | 18.619  | 19.010  |
| 4615 | ENSG00000168216 | LMBRD1    | 1.1  | 0.0334948 | 0.0938377 | 22.487  | 0.930 | 21.575  | 23.434  | 20.320  | 1.715 | 19.037  | 22.268  |
| 4616 | ENSG00000071282 | LMCD1     | 1.3  | 0.0101659 | 0.0369674 | 2.343   | 0.426 | 1.876   | 2.709   | 1.873   | 0.245 | 1.609   | 2.092   |
| 4618 | ENSG00000185621 | LMLN      | 1.2  | 0.0108522 | 0.0389525 | 3.181   | 0.125 | 3.108   | 3.325   | 2.682   | 0.403 | 2.285   | 3.091   |
| 4619 | ENSG00000160789 | LMNA      | 1.6  | 5.11E-14  | 7.65E-12  | 26.155  | 1.657 | 24.358  | 27.623  | 16.682  | 1.274 | 15.563  | 18.069  |
| 4620 | ENSG00000113368 | LMNB1     | 1.1  | 5.524E-05 | 0.0005555 | 180.044 | 4.484 | 175.395 | 184.343 | 163.977 | 2.454 | 161.866 | 166.670 |
| 4621 | ENSG00000176619 | LMNB2     | -1.1 | 0.0220796 | 0.0680575 | 132.642 | 0.306 | 132.291 | 132.858 | 144.197 | 6.710 | 137.345 | 150.756 |
| 4622 | ENSG00000135363 | LMO2      | -1.6 | 0.0045825 | 0.0197716 | 1.430   | 0.375 | 0.998   | 1.677   | 2.305   | 0.227 | 2.148   | 2.566   |

|      | A               | B             | C    | D         | E         | F       | G     | H       | I       | J       | K      | L       | M       |
|------|-----------------|---------------|------|-----------|-----------|---------|-------|---------|---------|---------|--------|---------|---------|
| 4629 | ENSG00000048540 | LMO3          | -2   | 2.169E-07 | 5.279E-06 | 0.678   | 0.187 | 0.547   | 0.892   | 1.410   | 0.115  | 1.317   | 1.538   |
| 4630 | ENSG00000136153 | LMO7          | 1.1  | 0.0591442 | 0.1440858 | 5.498   | 0.626 | 4.895   | 6.145   | 5.085   | 0.394  | 4.659   | 5.436   |
| 4634 | ENSG00000142235 | LMTK3         | -1.2 | 0.0347237 | 0.0963765 | 5.041   | 0.264 | 4.836   | 5.338   | 6.061   | 0.890  | 5.535   | 7.088   |
| 4635 | ENSG00000232301 | LNCPRESS<br>1 | 1.4  | 1.191E-09 | 5.643E-08 | 217.270 | 7.259 | 208.894 | 221.760 | 162.381 | 10.007 | 154.123 | 173.509 |
| 4637 | ENSG00000206535 | LNP1          | 1.1  | 0.0630582 | 0.1514179 | 15.653  | 0.525 | 15.175  | 16.215  | 14.148  | 0.367  | 13.769  | 14.501  |
| 4640 | ENSG00000113441 | LNPEP         | 1.2  | 0.0035767 | 0.0162353 | 3.609   | 0.201 | 3.377   | 3.736   | 3.120   | 0.058  | 3.072   | 3.184   |
| 4644 | ENSG00000072201 | LN1           | 1.2  | 0.0408969 | 0.1087049 | 2.603   | 0.352 | 2.238   | 2.940   | 2.146   | 0.475  | 1.612   | 2.523   |
| 4645 | ENSG00000196365 | LONP1         | 1.1  | 0.0056138 | 0.0231744 | 64.470  | 1.690 | 63.280  | 66.404  | 60.117  | 2.636  | 57.171  | 62.252  |
| 4646 | ENSG00000154359 | LONRF1        | 1.4  | 4.20E-14  | 6.52E-12  | 56.990  | 1.001 | 56.071  | 58.056  | 40.692  | 2.047  | 38.354  | 42.155  |
| 4648 | ENSG00000170500 | LONRF2        | 3.7  | 6.95E-19  | 3.79E-16  | 4.976   | 0.733 | 4.228   | 5.694   | 1.371   | 0.231  | 1.179   | 1.627   |
| 4649 | ENSG00000171517 | LPAR3         | -1.2 | 0.0010642 | 0.006191  | 11.662  | 0.952 | 11.059  | 12.760  | 14.742  | 1.724  | 13.018  | 16.465  |
| 4653 | ENSG00000139679 | LPAR6         | 1.5  | 0.0329996 | 0.0928812 | 1.373   | 0.389 | 0.959   | 1.732   | 0.956   | 0.209  | 0.719   | 1.113   |
| 4654 | ENSG00000153395 | LPCAT1        | -1   | 0.095203  | 0.2061608 | 114.294 | 1.710 | 112.996 | 116.231 | 122.084 | 3.184  | 118.445 | 124.354 |
| 4656 | ENSG00000087253 | LPCAT2        | 1.2  | 0.103944  | 0.219312  | 2.827   | 0.406 | 2.483   | 3.275   | 2.487   | 0.359  | 2.213   | 2.894   |
| 4657 | ENSG00000111684 | LPCAT3        | 1.1  | 0.0034551 | 0.0157852 | 22.047  | 1.402 | 20.856  | 23.592  | 19.651  | 1.320  | 18.755  | 21.167  |
| 4658 | ENSG00000176454 | LPCAT4        | -1.1 | 0.0026661 | 0.0128393 | 21.753  | 1.240 | 20.367  | 22.756  | 25.438  | 1.464  | 24.412  | 27.115  |
| 4661 | ENSG00000123684 | LPGAT1        | 1.2  | 0.0001173 | 0.010291  | 13.354  | 0.714 | 12.811  | 14.163  | 11.477  | 0.526  | 10.869  | 11.797  |
| 4662 | ENSG00000134324 | LPIN1         | 1.2  | 0.0001283 | 0.0011088 | 8.596   | 0.101 | 8.479   | 8.657   | 7.407   | 0.179  | 7.226   | 7.584   |
| 4666 | ENSG00000101577 | LPIN2         | 1.2  | 2.489E-06 | 4.103E-05 | 20.245  | 0.557 | 19.836  | 20.880  | 16.658  | 0.168  | 16.468  | 16.786  |
| 4669 | ENSG00000175445 | LPL           | 1.4  | 3.155E-06 | 4.985E-05 | 9.308   | 0.604 | 8.631   | 9.792   | 6.780   | 0.729  | 5.989   | 7.427   |
| 4672 | ENSG00000145012 | LPP           | 1.2  | 1.691E-06 | 2.933E-05 | 13.916  | 0.911 | 12.933  | 14.731  | 11.441  | 1.042  | 10.322  | 12.384  |
| 4674 | ENSG00000121207 | LRAT          | 1.4  | 9.515E-07 | 1.829E-05 | 7.846   | 0.773 | 7.231   | 8.714   | 5.596   | 0.796  | 4.695   | 6.202   |
| 4676 | ENSG00000198589 | LRBA          | -1   | 0.1220521 | 0.2460976 | 45.329  | 1.101 | 44.100  | 46.225  | 48.173  | 1.138  | 47.144  | 49.395  |
| 4678 | ENSG00000186001 | LRCH3         | 1.2  | 0.0003326 | 0.0023954 | 10.426  | 0.207 | 10.302  | 10.665  | 9.247   | 0.157  | 9.071   | 9.375   |
| 4681 | ENSG00000156564 | LRFN2         | -1.6 | 0.004885  | 0.0207786 | 0.846   | 0.262 | 0.633   | 1.139   | 1.426   | 0.131  | 1.276   | 1.520   |
| 4682 | ENSG00000126243 | LRFN3         | -1.4 | 0.0004151 | 0.0028728 | 4.772   | 0.476 | 4.274   | 5.221   | 6.597   | 1.011  | 5.530   | 7.541   |
| 4685 | ENSG00000173621 | LRFN4         | -1.1 | 0.0552277 | 0.1371006 | 35.530  | 1.705 | 33.644  | 36.963  | 39.593  | 3.721  | 36.738  | 43.801  |
| 4688 | ENSG00000121931 | LRIF1         | 1.2  | 2.498E-05 | 0.0002872 | 29.182  | 0.965 | 28.134  | 30.036  | 23.955  | 1.779  | 22.002  | 25.483  |
| 4689 | ENSG00000144749 | LRIG1         | -1.5 | 1.48E-17  | 5.56E-15  | 50.590  | 0.665 | 49.971  | 51.293  | 79.625  | 4.303  | 75.861  | 84.316  |
| 4690 | ENSG00000198799 | LRIG2         | -1.2 | 0.0001694 | 0.0013939 | 12.667  | 0.755 | 11.889  | 13.396  | 15.016  | 0.483  | 14.502  | 15.460  |
| 4692 | ENSG00000139263 | LRIG3         | 1.3  | 0.0003094 | 0.0022661 | 6.041   | 0.207 | 5.866   | 6.270   | 4.845   | 0.364  | 4.427   | 5.096   |
| 4697 | ENSG00000123384 | LRP1          | 1.1  | 0.081362  | 0.1837217 | 44.975  | 2.476 | 42.163  | 46.827  | 43.225  | 3.611  | 39.922  | 47.080  |
| 4699 | ENSG00000120256 | LRP11         | 1.1  | 0.0494566 | 0.1259918 | 32.347  | 2.687 | 30.063  | 35.308  | 30.392  | 1.532  | 29.382  | 32.156  |
| 4700 | ENSG00000147650 | LRP12         | 1.1  | 0.0371734 | 0.1011363 | 5.566   | 0.535 | 4.968   | 5.999   | 5.072   | 0.105  | 4.988   | 5.189   |
| 4702 | ENSG00000081479 | LRP2          | -1.5 | 6.593E-05 | 0.0006438 | 0.923   | 0.106 | 0.852   | 1.045   | 1.444   | 0.228  | 1.273   | 1.702   |
| 4703 | ENSG00000109771 | LRP2BP        | -2.1 | 0.0229519 | 0.0702217 | 0.114   | 0.081 | 0.020   | 0.162   | 0.245   | 0.027  | 0.227   | 0.276   |
| 4705 | ENSG00000134569 | LRP4          | 1.1  | 0.0331192 | 0.0931092 | 10.222  | 0.562 | 9.895   | 10.871  | 9.438   | 0.716  | 8.870   | 10.242  |
| 4706 | ENSG00000247675 | LRP4-AS1      | -2.4 | 0.0001132 | 0.0009983 | 1.224   | 0.195 | 1.007   | 1.385   | 3.013   | 0.957  | 1.924   | 3.722   |
| 4713 | ENSG00000162337 | LRP5          | 1.1  | 0.0342378 | 0.0953913 | 22.799  | 1.050 | 21.677  | 23.759  | 21.245  | 2.123  | 19.277  | 23.495  |
| 4718 | ENSG00000070018 | LRP6          | -1.1 | 0.0247902 | 0.0745117 | 36.391  | 0.178 | 36.205  | 36.560  | 39.631  | 0.966  | 38.612  | 40.534  |
| 4720 | ENSG00000157193 | LRP8          | 1.4  | 3.49E-13  | 4.19E-11  | 35.074  | 0.281 | 34.788  | 35.351  | 25.997  | 0.881  | 25.103  | 26.864  |

|      | A               | B               | C    | D         | E         | F       | G      | H       | I       | J       | K      | L       | M       |
|------|-----------------|-----------------|------|-----------|-----------|---------|--------|---------|---------|---------|--------|---------|---------|
| 4721 | ENSG00000163956 | LRPAP1          | 1.3  | 1.17E-08  | 4.277E-07 | 23.772  | 0.698  | 23.118  | 24.506  | 18.816  | 1.405  | 17.293  | 20.062  |
| 4722 | ENSG00000137269 | LRRC1           | 1.1  | 0.0753488 | 0.1730075 | 13.914  | 0.573  | 13.305  | 14.442  | 13.062  | 0.879  | 12.495  | 14.075  |
| 4726 | ENSG00000160959 | LRRC14          | -1.1 | 0.0496095 | 0.1263053 | 10.443  | 0.735  | 10.004  | 11.292  | 11.850  | 0.973  | 11.263  | 12.974  |
| 4727 | ENSG00000163827 | LRRC2           | -1.5 | 3.697E-07 | 8.347E-06 | 3.380   | 0.318  | 3.021   | 3.624   | 5.359   | 0.428  | 4.972   | 5.818   |
| 4728 | ENSG00000148814 | LRRC27          | -1.2 | 0.1210423 | 0.2444579 | 0.777   | 0.071  | 0.707   | 0.849   | 0.952   | 0.100  | 0.876   | 1.066   |
| 4729 | ENSG00000168904 | LRRC28          | 1.2  | 0.0085938 | 0.0322584 | 4.108   | 0.197  | 3.949   | 4.328   | 3.549   | 0.082  | 3.481   | 3.641   |
| 4731 | ENSG00000214425 | LRRC37A4<br>P   | 1.1  | 0.0417993 | 0.1105475 | 7.129   | 0.668  | 6.682   | 7.897   | 6.492   | 0.238  | 6.227   | 6.688   |
| 4732 | ENSG00000185158 | LRRC37B         | -1.1 | 0.0681663 | 0.1605929 | 6.998   | 0.236  | 6.742   | 7.209   | 7.978   | 0.257  | 7.682   | 8.130   |
| 4738 | ENSG00000122477 | LRRC39          | -2.7 | 0.000354  | 0.0025273 | 0.669   | 0.266  | 0.374   | 0.890   | 1.858   | 0.642  | 1.482   | 2.598   |
| 4739 | ENSG00000128594 | LRRC4           | 1.5  | 4.331E-05 | 0.000455  | 6.119   | 0.768  | 5.304   | 6.829   | 4.151   | 0.394  | 3.804   | 4.579   |
| 4740 | ENSG00000066557 | LRRC40          | -1.1 | 0.0145279 | 0.0492405 | 69.215  | 0.623  | 68.645  | 69.880  | 77.137  | 1.352  | 76.356  | 78.698  |
| 4742 | ENSG00000116212 | LRRC42          | -1.1 | 0.001123  | 0.0064624 | 52.461  | 1.758  | 50.609  | 54.108  | 61.011  | 3.384  | 57.175  | 63.572  |
| 4755 | ENSG00000137821 | LRRC49          | 1.2  | 0.0063507 | 0.0254585 | 3.227   | 0.022  | 3.209   | 3.251   | 2.729   | 0.221  | 2.589   | 2.984   |
| 4757 | ENSG00000131409 | LRRC4B          | -1.2 | 0.0975447 | 0.2094951 | 2.452   | 0.526  | 1.892   | 2.935   | 3.094   | 0.589  | 2.637   | 3.758   |
| 4760 | ENSG00000183908 | LRRC55          | 1.3  | 0.0554402 | 0.1374667 | 1.461   | 0.261  | 1.310   | 1.762   | 1.167   | 0.075  | 1.080   | 1.214   |
| 4761 | ENSG00000180979 | LRRC57          | 1.1  | 0.0798747 | 0.1810642 | 4.823   | 0.525  | 4.222   | 5.187   | 4.387   | 0.429  | 3.894   | 4.669   |
| 4763 | ENSG00000108829 | LRRC59          | -1.1 | 0.1106472 | 0.2294196 | 67.932  | 1.538  | 66.166  | 68.967  | 72.967  | 3.796  | 68.593  | 75.410  |
| 4765 | ENSG00000175061 | LRRC75A-<br>AS1 | 1.1  | 0.0004135 | 0.0028664 | 427.865 | 13.434 | 412.376 | 436.333 | 395.299 | 14.213 | 380.700 | 409.092 |
| 4766 | ENSG00000178026 | LRRC75B         | -1.2 | 0.0058398 | 0.0239043 | 7.804   | 0.797  | 7.271   | 8.721   | 9.812   | 0.901  | 8.940   | 10.740  |
| 4767 | ENSG00000136802 | LRRC8A          | 1.6  | 1.71E-17  | 6.27E-15  | 80.893  | 2.230  | 79.327  | 83.446  | 52.030  | 1.067  | 51.342  | 53.259  |
| 4769 | ENSG00000197147 | LRRC8B          | 1.2  | 7.178E-05 | 0.0006898 | 20.343  | 0.121  | 20.237  | 20.476  | 17.749  | 1.053  | 16.829  | 18.897  |
| 4770 | ENSG00000171492 | LRRC8D          | 1.4  | 6.47E-11  | 4.397E-09 | 43.943  | 2.824  | 41.034  | 46.673  | 32.465  | 0.592  | 31.976  | 33.123  |
| 4772 | ENSG00000171017 | LRRC8E          | -1.2 | 0.0669659 | 0.1584713 | 1.950   | 0.116  | 1.858   | 2.080   | 2.443   | 0.440  | 1.966   | 2.834   |
| 4776 | ENSG00000133739 | LRRC1           | 1.3  | 7.55E-05  | 0.0007184 | 15.084  | 1.084  | 14.205  | 16.296  | 11.928  | 1.077  | 10.900  | 13.048  |
| 4779 | ENSG00000175928 | LRRN1           | -1.2 | 4.468E-06 | 6.735E-05 | 165.186 | 5.557  | 160.236 | 171.197 | 196.893 | 2.711  | 194.998 | 199.998 |
| 4780 | ENSG00000176204 | LRRTM4          | 1.2  | 0.0565112 | 0.1393257 | 3.424   | 0.647  | 2.797   | 4.090   | 2.925   | 0.350  | 2.587   | 3.287   |
| 4781 | ENSG00000161036 | LRWD1           | -1.1 | 0.0784578 | 0.1787389 | 12.282  | 0.248  | 12.009  | 12.495  | 13.664  | 1.451  | 12.474  | 15.281  |
| 4782 | ENSG00000175324 | LSM1            | -1.1 | 0.0783736 | 0.1785952 | 45.508  | 2.701  | 42.492  | 47.701  | 50.604  | 2.853  | 47.509  | 53.127  |
| 4783 | ENSG00000181817 | LSM10           | 1.1  | 0.0067306 | 0.026653  | 44.492  | 2.012  | 42.169  | 45.695  | 39.607  | 2.141  | 37.741  | 41.945  |
| 4787 | ENSG00000155858 | LSM11           | -1.2 | 0.0006268 | 0.004023  | 7.387   | 0.069  | 7.310   | 7.445   | 9.210   | 0.788  | 8.670   | 10.114  |
| 4788 | ENSG00000232024 | LSM12P1         | -1.1 | 0.0751974 | 0.1728008 | 153.808 | 6.243  | 147.017 | 159.298 | 169.708 | 4.697  | 165.468 | 174.757 |
| 4789 | ENSG00000149657 | LSM14B          | -1.1 | 0.0011236 | 0.0064635 | 65.306  | 0.794  | 64.455  | 66.026  | 74.360  | 0.508  | 73.952  | 74.929  |
| 4791 | ENSG00000130520 | LSM4            | -1.1 | 0.0033277 | 0.0153021 | 142.093 | 3.676  | 137.936 | 144.915 | 158.872 | 5.380  | 155.453 | 165.073 |
| 4793 | ENSG00000130332 | LSM7            | -1.1 | 0.0007962 | 0.0048526 | 95.896  | 1.558  | 94.665  | 97.647  | 110.338 | 1.712  | 108.380 | 111.553 |
| 4794 | ENSG00000160285 | LSS             | 1.7  | 5.84E-18  | 2.35E-15  | 45.321  | 1.085  | 44.149  | 46.290  | 28.017  | 1.912  | 25.948  | 29.718  |
| 4795 | ENSG00000119681 | LTBP2           | 1.4  | 0.016677  | 0.0548113 | 0.695   | 0.082  | 0.617   | 0.780   | 0.489   | 0.073  | 0.422   | 0.568   |
| 4796 | ENSG00000090006 | LTBP4           | -1.1 | 0.003559  | 0.0161636 | 20.762  | 0.936  | 19.812  | 21.683  | 24.402  | 1.792  | 23.234  | 26.465  |
| 4797 | ENSG00000135521 | LTV1            | -1.1 | 0.0263393 | 0.0779897 | 52.120  | 2.869  | 49.769  | 55.317  | 58.606  | 3.026  | 56.503  | 62.074  |
| 4800 | ENSG00000007392 | LUC7L           | -1.4 | 2.09E-12  | 2.14E-10  | 32.797  | 1.700  | 31.014  | 34.401  | 47.123  | 1.898  | 45.991  | 49.315  |
| 4805 | ENSG00000146963 | LUC7L2          | -1.1 | 0.0341939 | 0.0953695 | 13.571  | 0.195  | 13.348  | 13.707  | 15.325  | 0.715  | 14.728  | 16.118  |

|      | A               | B        | C    | D         | E         | F       | G     | H       | I       | J       | K     | L       | M       |
|------|-----------------|----------|------|-----------|-----------|---------|-------|---------|---------|---------|-------|---------|---------|
| 4806 | ENSG00000108848 | LUC7L3   | -1.2 | 1.761E-05 | 0.0002132 | 113.884 | 2.865 | 110.655 | 116.121 | 134.075 | 1.576 | 132.472 | 135.622 |
| 4807 | ENSG00000171357 | LURAP1   | -1.2 | 0.0841277 | 0.1885978 | 6.605   | 0.345 | 6.212   | 6.853   | 7.899   | 0.401 | 7.471   | 8.267   |
| 4809 | ENSG00000169641 | LUZP1    | -1.1 | 0.0006896 | 0.0043212 | 28.315  | 0.550 | 27.752  | 28.850  | 32.289  | 1.446 | 31.086  | 33.893  |
| 4810 | ENSG00000187398 | LUZP2    | 1.9  | 8.189E-07 | 1.612E-05 | 1.701   | 0.167 | 1.535   | 1.869   | 0.918   | 0.095 | 0.842   | 1.025   |
| 4811 | ENSG00000160932 | LY6E     | -1.2 | 0.0005119 | 0.0034235 | 62.713  | 2.210 | 60.176  | 64.222  | 74.371  | 5.148 | 69.002  | 79.266  |
| 4812 | ENSG00000145220 | LYAR     | -1.1 | 0.0097681 | 0.035767  | 47.954  | 1.177 | 46.739  | 49.088  | 54.285  | 1.813 | 52.436  | 56.061  |
| 4813 | ENSG00000254087 | LYN      | 1.2  | 0.0011874 | 0.0067475 | 19.696  | 1.710 | 17.724  | 20.764  | 17.416  | 0.343 | 17.069  | 17.755  |
| 4814 | ENSG00000180155 | LYNX1    | 1.2  | 0.0168992 | 0.0553799 | 9.853   | 1.110 | 8.585   | 10.649  | 8.510   | 1.523 | 7.205   | 10.184  |
| 4815 | ENSG00000150551 | LYPD1    | 1.4  | 0.0079169 | 0.0304018 | 5.693   | 1.173 | 4.346   | 6.486   | 4.186   | 0.984 | 3.219   | 5.187   |
| 4816 | ENSG00000187123 | LYPD6    | -1.2 | 0.0007607 | 0.0046684 | 7.200   | 0.398 | 6.840   | 7.627   | 9.086   | 0.453 | 8.578   | 9.450   |
| 4819 | ENSG00000120992 | LYPLA1   | 1.4  | 3.874E-10 | 2.134E-08 | 145.807 | 1.034 | 145.170 | 147.000 | 109.585 | 6.176 | 104.757 | 116.544 |
| 4820 | ENSG00000218350 | LYPLA1P3 | 1.3  | 3.491E-05 | 0.0003785 | 80.962  | 4.774 | 75.677  | 84.960  | 64.674  | 1.510 | 63.275  | 66.275  |
| 4821 | ENSG00000163155 | LYSMD1   | -1.3 | 0.0029358 | 0.0138231 | 6.888   | 0.782 | 6.000   | 7.476   | 9.042   | 0.752 | 8.359   | 9.848   |
| 4823 | ENSG00000140280 | LYSMD2   | 1.6  | 0.0032447 | 0.014998  | 3.264   | 0.802 | 2.634   | 4.166   | 2.042   | 0.376 | 1.770   | 2.471   |
| 4825 | ENSG00000176018 | LYSMD3   | -1.1 | 0.0141855 | 0.0483028 | 18.742  | 1.364 | 17.341  | 20.066  | 21.576  | 0.537 | 21.220  | 22.194  |
| 4826 | ENSG00000183060 | LYSMD4   | 1.2  | 0.0012197 | 0.0068853 | 8.823   | 0.346 | 8.428   | 9.075   | 7.530   | 0.154 | 7.353   | 7.632   |
| 4830 | ENSG00000163818 | LZTFL1   | 1.2  | 0.0008857 | 0.0052934 | 7.585   | 0.655 | 6.828   | 7.965   | 6.332   | 0.408 | 6.016   | 6.793   |
| 4831 | ENSG00000099949 | LZTR1    | -1.1 | 0.1037401 | 0.219014  | 11.546  | 0.248 | 11.372  | 11.829  | 12.716  | 0.760 | 11.839  | 13.186  |
| 4832 | ENSG00000061337 | LZTS1    | 1.2  | 0.002154  | 0.0107432 | 5.530   | 0.186 | 5.408   | 5.744   | 4.546   | 0.422 | 4.083   | 4.906   |
| 4834 | ENSG00000088899 | LZTS3    | -1.3 | 1.618E-08 | 5.654E-07 | 20.647  | 0.735 | 19.799  | 21.073  | 28.232  | 0.557 | 27.871  | 28.874  |
| 4835 | ENSG00000003056 | M6PR     | 1.2  | 2.211E-06 | 3.68E-05  | 78.547  | 2.572 | 75.813  | 80.917  | 67.610  | 2.870 | 65.315  | 70.829  |
| 4836 | ENSG00000183833 | MAATS1   | -1.2 | 0.0793676 | 0.1802433 | 2.100   | 0.416 | 1.683   | 2.516   | 2.549   | 0.065 | 2.491   | 2.619   |
| 4842 | ENSG00000127603 | MACF1    | 1.1  | 0.0889902 | 0.1964101 | 34.341  | 2.357 | 32.430  | 36.975  | 33.364  | 1.897 | 31.300  | 35.030  |
| 4845 | ENSG00000133315 | MACROD1  | -1.2 | 0.0188936 | 0.0603148 | 21.109  | 1.017 | 20.156  | 22.180  | 25.494  | 3.227 | 22.749  | 29.049  |
| 4846 | ENSG00000002822 | MAD1L1   | -1.1 | 0.0743017 | 0.1712544 | 7.663   | 0.814 | 6.743   | 8.291   | 8.690   | 0.770 | 8.227   | 9.579   |
| 4847 | ENSG00000164109 | MAD2L1   | -1.1 | 0.024298  | 0.0733799 | 69.611  | 3.114 | 66.743  | 72.923  | 76.231  | 2.183 | 73.894  | 78.217  |
| 4849 | ENSG00000116670 | MAD2L2   | -1.2 | 3.744E-06 | 5.777E-05 | 96.016  | 2.488 | 93.322  | 98.226  | 115.227 | 5.832 | 108.719 | 119.981 |
| 4850 | ENSG00000099866 | MADCAM1  | -1.4 | 0.036335  | 0.0996166 | 1.397   | 0.143 | 1.293   | 1.559   | 2.035   | 0.446 | 1.640   | 2.518   |
| 4852 | ENSG00000110514 | MADD     | -1.2 | 1.36E-05  | 0.0001731 | 20.867  | 1.335 | 19.849  | 22.378  | 25.558  | 1.565 | 23.761  | 26.621  |
| 4854 | ENSG00000178573 | MAF      | -1.3 | 0.000462  | 0.0031369 | 3.100   | 0.311 | 2.751   | 3.346   | 4.195   | 0.380 | 3.828   | 4.586   |
| 4856 | ENSG00000179632 | MAF1     | -1.1 | 0.0324335 | 0.091693  | 83.275  | 0.830 | 82.363  | 83.988  | 91.717  | 6.700 | 84.602  | 97.906  |
| 4859 | ENSG00000204103 | MAFB     | -1.9 | 6.497E-08 | 1.866E-06 | 2.851   | 0.490 | 2.371   | 3.351   | 5.704   | 0.819 | 5.117   | 6.640   |
| 4861 | ENSG00000185022 | MAFF     | 2.1  | 2.86E-13  | 3.48E-11  | 6.832   | 0.267 | 6.547   | 7.078   | 3.315   | 0.196 | 3.098   | 3.477   |
| 4866 | ENSG00000197063 | MAFG     | 1.2  | 6.117E-06 | 8.782E-05 | 25.409  | 0.909 | 24.360  | 25.951  | 20.841  | 2.137 | 18.981  | 23.175  |
| 4869 | ENSG00000147381 | MAGEA4   | 1.4  | 0.0737753 | 0.1704359 | 1.667   | 0.389 | 1.246   | 2.014   | 1.247   | 0.464 | 0.711   | 1.517   |
| 4871 | ENSG00000179222 | MAGED1   | -1.2 | 4.319E-05 | 0.000454  | 58.913  | 4.105 | 54.508  | 62.630  | 69.694  | 2.903 | 66.466  | 72.090  |
| 4875 | ENSG00000154545 | MAGED4   | -1.1 | 0.005969  | 0.0242969 | 25.560  | 1.482 | 23.883  | 26.692  | 29.411  | 0.899 | 28.526  | 30.324  |
| 4876 | ENSG00000187243 | MAGED4B  | -1.1 | 0.0020426 | 0.0103215 | 24.644  | 1.528 | 22.954  | 25.927  | 28.753  | 0.770 | 27.916  | 29.431  |
| 4878 | ENSG00000198934 | MAGEE1   | 1.1  | 0.0331784 | 0.0932446 | 12.950  | 0.614 | 12.243  | 13.349  | 11.721  | 0.859 | 11.126  | 12.706  |
| 4881 | ENSG00000177383 | MAGEF1   | -1.1 | 0.0002141 | 0.0016809 | 96.180  | 1.013 | 95.572  | 97.349  | 112.630 | 2.868 | 109.651 | 115.372 |

|      | A               | B         | C    | D         | E         | F       | G     | H       | I       | J       | K     | L       | M       |
|------|-----------------|-----------|------|-----------|-----------|---------|-------|---------|---------|---------|-------|---------|---------|
| 4882 | ENSG00000254585 | MAGEL2    | -1.3 | 0.0023744 | 0.0116635 | 4.618   | 0.143 | 4.466   | 4.749   | 5.925   | 0.317 | 5.591   | 6.222   |
| 4883 | ENSG00000234456 | MAGI2-AS3 | 1.6  | 0.0004885 | 0.0032904 | 0.964   | 0.082 | 0.871   | 1.029   | 0.628   | 0.113 | 0.498   | 0.703   |
| 4884 | ENSG00000111196 | MAGOHB    | 1.2  | 0.0007777 | 0.0047535 | 19.997  | 0.772 | 19.237  | 20.780  | 17.273  | 1.444 | 15.621  | 18.293  |
| 4885 | ENSG00000102158 | MAGT1     | 1.1  | 0.0014301 | 0.0077849 | 40.658  | 0.916 | 39.774  | 41.603  | 36.990  | 2.193 | 35.526  | 39.512  |
| 4887 | ENSG00000162972 | MAIP1     | -1.2 | 0.0071345 | 0.0279383 | 32.324  | 1.906 | 30.658  | 34.402  | 38.361  | 2.961 | 34.959  | 40.355  |
| 4889 | ENSG00000147676 | MAL2      | 1.2  | 5.625E-09 | 2.281E-07 | 136.295 | 2.602 | 133.478 | 138.608 | 112.733 | 1.974 | 110.521 | 114.313 |
| 4891 | ENSG00000144063 | MALL      | 1.5  | 2.567E-05 | 0.0002933 | 5.900   | 0.648 | 5.268   | 6.562   | 3.920   | 0.346 | 3.531   | 4.189   |
| 4892 | ENSG00000156928 | MALSU1    | -1.1 | 0.0174235 | 0.056616  | 20.192  | 0.406 | 19.847  | 20.640  | 23.112  | 1.381 | 21.898  | 24.615  |
| 4896 | ENSG00000172175 | MALT1     | 1.2  | 0.0007184 | 0.0044587 | 9.427   | 0.601 | 8.980   | 10.111  | 8.231   | 0.381 | 7.844   | 8.606   |
| 4898 | ENSG00000177943 | MAMDC4    | -1.4 | 0.000479  | 0.0032317 | 2.771   | 0.267 | 2.588   | 3.078   | 3.864   | 0.221 | 3.720   | 4.118   |
| 4899 | ENSG00000184384 | MAML2     | 1.8  | 5.039E-07 | 1.09E-05  | 2.284   | 0.352 | 1.886   | 2.555   | 1.276   | 0.218 | 1.122   | 1.526   |
| 4900 | ENSG00000176909 | MAMSTR    | -1.5 | 0.0711359 | 0.1657876 | 1.024   | 0.356 | 0.658   | 1.370   | 1.518   | 0.354 | 1.253   | 1.920   |
| 4902 | ENSG00000111885 | MAN1A1    | 1.3  | 0.0001529 | 0.0012769 | 8.251   | 0.304 | 7.934   | 8.539   | 6.561   | 0.519 | 6.207   | 7.156   |
| 4903 | ENSG00000177239 | MAN1B1    | -1.1 | 0.0340333 | 0.0950314 | 11.047  | 0.252 | 10.802  | 11.305  | 12.373  | 1.060 | 11.498  | 13.552  |
| 4907 | ENSG00000117643 | MAN1C1    | 1.2  | 0.035042  | 0.0970468 | 4.252   | 0.474 | 3.730   | 4.655   | 3.726   | 0.210 | 3.495   | 3.906   |
| 4908 | ENSG00000196547 | MAN2A2    | 1.1  | 0.0083373 | 0.0315525 | 9.656   | 0.339 | 9.285   | 9.950   | 8.735   | 0.483 | 8.193   | 9.116   |
| 4911 | ENSG00000104774 | MAN2B1    | -1.1 | 0.0467863 | 0.1206967 | 21.710  | 0.046 | 21.677  | 21.763  | 23.985  | 1.283 | 23.198  | 25.465  |
| 4912 | ENSG0000013288  | MAN2B2    | 1.3  | 0.0034431 | 0.0157342 | 3.796   | 0.324 | 3.586   | 4.169   | 2.955   | 0.640 | 2.279   | 3.551   |
| 4913 | ENSG00000140400 | MAN2C1    | -1.2 | 4.223E-05 | 0.0004455 | 11.905  | 0.305 | 11.571  | 12.169  | 14.773  | 1.035 | 13.582  | 15.459  |
| 4915 | ENSG00000109323 | MANBA     | 1.2  | 2.925E-06 | 4.676E-05 | 16.707  | 0.289 | 16.387  | 16.951  | 14.039  | 0.047 | 13.985  | 14.070  |
| 4916 | ENSG00000101363 | MANBAL    | -1.1 | 0.0257744 | 0.0767441 | 48.358  | 0.652 | 47.719  | 49.022  | 54.441  | 3.154 | 50.858  | 56.799  |
| 4918 | ENSG00000172469 | MANEA     | 1.2  | 0.0051738 | 0.0216808 | 9.994   | 0.331 | 9.737   | 10.368  | 8.681   | 0.500 | 8.111   | 9.041   |
| 4919 | ENSG00000185090 | MANEAL    | 2.3  | 3.66E-12  | 3.436E-10 | 10.081  | 1.380 | 8.561   | 11.255  | 4.423   | 0.213 | 4.220   | 4.645   |
| 4924 | ENSG00000111261 | MANSC1    | 1.2  | 0.0380109 | 0.102877  | 4.671   | 0.135 | 4.516   | 4.765   | 4.082   | 0.482 | 3.614   | 4.578   |
| 4925 | ENSG00000189221 | MAOA      | 1.2  | 0.0234348 | 0.0714021 | 5.536   | 0.667 | 4.824   | 6.147   | 4.657   | 0.275 | 4.470   | 4.973   |
| 4927 | ENSG00000212916 | MAP10     | 1.2  | 0.0623498 | 0.1500246 | 4.285   | 0.620 | 3.611   | 4.831   | 3.620   | 0.360 | 3.381   | 4.035   |
| 4928 | ENSG00000166963 | MAP1A     | 1.2  | 0.1093595 | 0.2275027 | 1.050   | 0.091 | 0.958   | 1.140   | 0.885   | 0.158 | 0.707   | 1.008   |
| 4932 | ENSG00000131711 | MAP1B     | 1.5  | 3.50E-16  | 8.82E-14  | 39.412  | 1.515 | 37.783  | 40.778  | 26.995  | 0.987 | 25.871  | 27.722  |
| 4934 | ENSG00000140941 | MAP1LC3B  | 1.2  | 2.671E-06 | 4.352E-05 | 38.815  | 0.799 | 38.136  | 39.695  | 33.254  | 0.344 | 32.861  | 33.505  |
| 4936 | ENSG00000258102 | MAP1LC3B2 | 1.2  | 0.0154702 | 0.0516834 | 19.661  | 1.520 | 18.438  | 21.362  | 17.163  | 0.467 | 16.744  | 17.666  |
| 4937 | ENSG00000197769 | MAP1LC3C  | -3.7 | 4.48E-09  | 1.853E-07 | 1.836   | 0.749 | 1.134   | 2.625   | 7.054   | 0.694 | 6.438   | 7.807   |
| 4938 | ENSG00000078018 | MAP2      | -1.3 | 0.0006546 | 0.0041617 | 2.640   | 0.140 | 2.478   | 2.722   | 3.442   | 0.158 | 3.274   | 3.587   |
| 4940 | ENSG00000169032 | MAP2K1    | -1.1 | 0.0008033 | 0.0048837 | 61.204  | 3.876 | 57.826  | 65.437  | 70.831  | 5.455 | 65.396  | 76.306  |
| 4944 | ENSG00000126934 | MAP2K2    | -1.1 | 0.0826943 | 0.1861639 | 34.831  | 0.813 | 34.330  | 35.769  | 38.064  | 2.572 | 35.369  | 40.494  |
| 4945 | ENSG00000065559 | MAP2K4    | 1.2  | 0.0004392 | 0.0030077 | 27.331  | 1.375 | 25.748  | 28.234  | 24.255  | 0.886 | 23.605  | 25.264  |
| 4947 | ENSG00000108984 | MAP2K6    | -1.2 | 0.0004608 | 0.0031319 | 9.044   | 0.395 | 8.780   | 9.497   | 11.116  | 0.305 | 10.903  | 11.465  |
| 4951 | ENSG00000076984 | MAP2K7    | -1.1 | 0.0056572 | 0.0233082 | 17.102  | 0.354 | 16.798  | 17.490  | 19.767  | 1.259 | 18.975  | 21.218  |
| 4952 | ENSG00000095015 | MAP3K1    | 1.2  | 1.153E-05 | 0.0001503 | 13.459  | 0.695 | 12.763  | 14.153  | 11.091  | 0.284 | 10.828  | 11.391  |

|      | A                | B            | C    | D         | E         | F       | G     | H       | I       | J       | K     | L       | M       |
|------|------------------|--------------|------|-----------|-----------|---------|-------|---------|---------|---------|-------|---------|---------|
| 4953 | ENSG00000130758  | MAP3K10      | -1.2 | 0.0060867 | 0.0246337 | 7.149   | 0.720 | 6.374   | 7.798   | 8.907   | 0.709 | 8.435   | 9.722   |
| 4954 | ENSG00000173327  | MAP3K11      | -1.1 | 0.0882493 | 0.1951825 | 8.731   | 0.082 | 8.651   | 8.814   | 9.758   | 1.429 | 8.247   | 11.089  |
| 4956 | ENSG00000139625  | MAP3K12      | -1.2 | 0.0013542 | 0.0074579 | 5.995   | 0.851 | 5.375   | 6.965   | 7.513   | 0.603 | 6.972   | 8.162   |
| 4959 | ENSG00000006062  | MAP3K14      | 1.8  | 1.90E-11  | 1.51E-09  | 7.981   | 0.245 | 7.739   | 8.230   | 4.541   | 0.452 | 4.192   | 5.051   |
| 4961 | ENSG000000091436 | MAP3K20      | 1.1  | 0.0015666 | 0.0083824 | 9.463   | 0.757 | 9.004   | 10.336  | 8.463   | 0.223 | 8.266   | 8.705   |
| 4962 | ENSG00000197442  | MAP3K5       | 1.6  | 9.724E-05 | 0.0008828 | 2.346   | 0.385 | 1.922   | 2.673   | 1.470   | 0.312 | 1.259   | 1.829   |
| 4963 | ENSG00000142733  | MAP3K6       | -1.1 | 0.1071794 | 0.2242638 | 4.736   | 0.423 | 4.273   | 5.103   | 5.429   | 0.448 | 4.955   | 5.844   |
| 4964 | ENSG00000006432  | MAP3K9       | -1.1 | 0.0801922 | 0.1816137 | 9.703   | 0.447 | 9.191   | 10.008  | 10.590  | 0.555 | 10.200  | 11.225  |
| 4966 | ENSG00000011566  | MAP4K3       | -1.1 | 0.0217291 | 0.067296  | 35.438  | 2.219 | 33.946  | 37.988  | 39.494  | 1.250 | 38.652  | 40.931  |
| 4968 | ENSG00000071054  | MAP4K4       | 1.1  | 0.0004308 | 0.0029654 | 72.299  | 0.267 | 71.995  | 72.495  | 67.244  | 0.986 | 66.107  | 67.866  |
| 4970 | ENSG00000171533  | MAP6         | -1.8 | 0.0028166 | 0.0134027 | 0.622   | 0.242 | 0.367   | 0.849   | 1.113   | 0.148 | 0.997   | 1.279   |
| 4971 | ENSG00000135525  | MAP7         | -1.1 | 0.0179137 | 0.0578525 | 45.343  | 0.954 | 44.590  | 46.416  | 50.023  | 2.050 | 47.692  | 51.548  |
| 4975 | ENSG00000184368  | MAP7D2       | 2.1  | 8.047E-07 | 1.588E-05 | 2.958   | 0.623 | 2.564   | 3.677   | 1.467   | 0.117 | 1.373   | 1.597   |
| 4976 | ENSG00000164114  | MAP9         | 1.1  | 0.0648124 | 0.1544339 | 9.666   | 0.431 | 9.241   | 10.102  | 9.026   | 0.255 | 8.750   | 9.252   |
| 4977 | ENSG00000156711  | MAPK13       | 1.1  | 0.0858834 | 0.1914267 | 13.468  | 0.613 | 12.760  | 13.836  | 12.780  | 0.510 | 12.429  | 13.365  |
| 4979 | ENSG00000181085  | MAPK15       | -1.4 | 0.0064418 | 0.0257506 | 2.698   | 0.260 | 2.514   | 2.995   | 3.772   | 0.089 | 3.685   | 3.862   |
| 4981 | ENSG00000168175  | MAPK1IP1L    | 1.1  | 0.0394886 | 0.105888  | 36.537  | 1.814 | 34.587  | 38.174  | 34.900  | 0.869 | 34.064  | 35.799  |
| 4983 | ENSG00000102882  | MAPK3        | 1.2  | 0.000422  | 0.0029157 | 25.405  | 1.060 | 24.648  | 26.617  | 21.838  | 0.533 | 21.378  | 22.422  |
| 4984 | ENSG00000141639  | MAPK4        | 1.3  | 0.0290614 | 0.0841925 | 2.001   | 0.262 | 1.709   | 2.215   | 1.626   | 0.116 | 1.537   | 1.757   |
| 4985 | ENSG00000166484  | MAPK7        | -1.2 | 0.0028231 | 0.0134198 | 6.670   | 0.658 | 6.194   | 7.421   | 8.373   | 0.537 | 7.771   | 8.800   |
| 4986 | ENSG00000121653  | MAPK8IP1     | -1.1 | 0.0414192 | 0.1098    | 25.146  | 1.830 | 23.116  | 26.670  | 28.312  | 2.258 | 26.172  | 30.672  |
| 4988 | ENSG00000138834  | MAPK8IP3     | -1.1 | 0.0035818 | 0.0162452 | 16.481  | 0.351 | 16.107  | 16.803  | 18.769  | 0.914 | 18.011  | 19.784  |
| 4989 | ENSG00000114738  | MAPKAPK3     | 1.1  | 0.014342  | 0.0487374 | 45.790  | 2.070 | 43.430  | 47.295  | 42.949  | 1.080 | 41.839  | 43.996  |
| 4990 | ENSG00000089022  | MAPKAPK5     | 1.1  | 0.0100788 | 0.0366822 | 14.443  | 0.300 | 14.116  | 14.704  | 13.516  | 0.425 | 13.178  | 13.993  |
| 4992 | ENSG00000234608  | MAPKAPK5-AS1 | -1.1 | 0.1003371 | 0.2137282 | 46.464  | 1.250 | 45.132  | 47.612  | 51.180  | 5.455 | 45.281  | 56.042  |
| 4994 | ENSG00000137802  | MAPKBP1      | -1.2 | 0.0045214 | 0.0195677 | 3.195   | 0.301 | 2.851   | 3.409   | 3.953   | 0.383 | 3.569   | 4.335   |
| 4995 | ENSG00000084764  | MAPRE3       | -1.2 | 0.117239  | 0.2389567 | 2.569   | 0.365 | 2.326   | 2.988   | 3.201   | 0.535 | 2.847   | 3.816   |
| 4998 | ENSG00000186868  | MAPT         | -1.3 | 0.1177147 | 0.2396088 | 0.371   | 0.090 | 0.277   | 0.455   | 0.482   | 0.100 | 0.367   | 0.548   |
| 4999 | ENSG00000117791  | MARC2        | 1.1  | 0.0846637 | 0.189382  | 14.238  | 0.511 | 13.768  | 14.782  | 13.089  | 0.406 | 12.707  | 13.515  |
| 5000 | ENSG00000144583  | MARCH4       | -1.2 | 0.0404778 | 0.1079983 | 3.197   | 0.226 | 3.023   | 3.453   | 3.917   | 0.162 | 3.763   | 4.086   |
| 5002 | ENSG00000198060  | MARCH5       | -1.2 | 0.0015027 | 0.0081018 | 19.909  | 1.175 | 18.977  | 21.229  | 23.537  | 1.744 | 21.525  | 24.608  |
| 5003 | ENSG00000136536  | MARCH7       | -1.1 | 0.0013952 | 0.0076364 | 66.310  | 0.860 | 65.435  | 67.154  | 75.286  | 3.929 | 72.504  | 79.781  |
| 5004 | ENSG00000277443  | MARCKS       | -1.1 | 0.0001381 | 0.0011736 | 137.518 | 2.275 | 134.935 | 139.227 | 157.246 | 6.073 | 152.755 | 164.155 |
| 5005 | ENSG00000166783  | MARF1        | -1.1 | 0.0149969 | 0.0504359 | 10.415  | 0.346 | 10.074  | 10.766  | 11.710  | 0.634 | 11.249  | 12.433  |
| 5007 | ENSG00000116141  | MARK1        | 1.1  | 0.0909355 | 0.199921  | 17.783  | 0.242 | 17.564  | 18.042  | 16.873  | 0.810 | 15.969  | 17.530  |

|      | A               | B        | C    | D         | E         | F       | G     | H       | I       | J       | K     | L       | M       |
|------|-----------------|----------|------|-----------|-----------|---------|-------|---------|---------|---------|-------|---------|---------|
| 5012 | ENSG00000072518 | MARK2    | -1.1 | 0.0017666 | 0.0092288 | 19.248  | 0.786 | 18.354  | 19.830  | 22.497  | 1.596 | 20.769  | 23.915  |
| 5013 | ENSG00000007047 | MARK4    | -1.3 | 9.543E-08 | 2.624E-06 | 15.727  | 0.128 | 15.610  | 15.864  | 21.343  | 1.863 | 20.053  | 23.479  |
| 5017 | ENSG00000166986 | MARS     | 1.4  | 1.74E-15  | 3.58E-13  | 125.003 | 3.587 | 121.154 | 128.253 | 91.030  | 2.636 | 88.279  | 93.532  |
| 5020 | ENSG00000247626 | MARS2    | -1.3 | 4.885E-06 | 7.285E-05 | 16.728  | 0.641 | 15.989  | 17.128  | 22.319  | 1.129 | 21.091  | 23.312  |
| 5021 | ENSG00000155254 | MARVELD1 | 1.1  | 0.0348258 | 0.0965746 | 37.318  | 0.301 | 37.125  | 37.665  | 34.936  | 2.506 | 32.251  | 37.214  |
| 5023 | ENSG00000140832 | MARVELD3 | 1.2  | 0.0106523 | 0.038357  | 13.427  | 0.627 | 12.895  | 14.118  | 11.892  | 0.347 | 11.525  | 12.215  |
| 5026 | ENSG00000105613 | MAST1    | -1.3 | 0.0005588 | 0.0036661 | 3.938   | 0.296 | 3.618   | 4.204   | 5.276   | 0.745 | 4.612   | 6.081   |
| 5027 | ENSG00000099308 | MAST3    | -1.2 | 0.0297007 | 0.0855901 | 3.267   | 0.235 | 3.009   | 3.469   | 3.973   | 0.699 | 3.417   | 4.758   |
| 5030 | ENSG00000069020 | MAST4    | -1.2 | 0.0134125 | 0.0461913 | 1.655   | 0.119 | 1.543   | 1.781   | 2.008   | 0.100 | 1.905   | 2.104   |
| 5032 | ENSG00000120539 | MASTL    | 1.1  | 0.0355659 | 0.0980324 | 45.611  | 1.296 | 44.472  | 47.022  | 43.409  | 1.412 | 41.915  | 44.721  |
| 5033 | ENSG00000151224 | MAT1A    | 1.8  | 3.91E-12  | 3.595E-10 | 15.027  | 0.828 | 14.164  | 15.815  | 8.628   | 0.406 | 8.186   | 8.986   |
| 5038 | ENSG00000038274 | MAT2B    | 1.1  | 0.060721  | 0.1470258 | 52.022  | 2.841 | 50.250  | 55.299  | 49.873  | 1.576 | 48.853  | 51.689  |
| 5040 | ENSG00000132561 | MATN2    | 1.2  | 0.0078078 | 0.0300533 | 5.734   | 0.675 | 4.962   | 6.210   | 4.926   | 0.411 | 4.525   | 5.346   |
| 5042 | ENSG00000132031 | MATN3    | 1.4  | 0.0015505 | 0.0083168 | 8.138   | 1.479 | 6.866   | 9.761   | 6.073   | 0.361 | 5.674   | 6.375   |
| 5043 | ENSG00000129933 | MAU2     | -1.1 | 0.0541789 | 0.135072  | 8.152   | 0.784 | 7.366   | 8.935   | 9.122   | 0.342 | 8.807   | 9.486   |
| 5045 | ENSG00000125952 | MAX      | 1.2  | 0.0006823 | 0.0042883 | 16.494  | 0.763 | 16.042  | 17.375  | 14.162  | 0.859 | 13.562  | 15.146  |
| 5047 | ENSG00000103495 | MAZ      | -1.1 | 0.0003198 | 0.0023245 | 131.411 | 6.567 | 124.006 | 136.527 | 152.390 | 8.344 | 147.383 | 162.023 |
| 5048 | ENSG00000180611 | MB21D2   | 1.1  | 0.0323109 | 0.0914295 | 14.246  | 1.018 | 13.182  | 15.212  | 12.649  | 1.214 | 11.248  | 13.374  |
| 5050 | ENSG00000134046 | MBD2     | -1.1 | 0.0564443 | 0.1391867 | 7.912   | 0.232 | 7.674   | 8.137   | 9.002   | 0.160 | 8.818   | 9.115   |
| 5051 | ENSG00000129071 | MBD4     | -1.2 | 8.715E-05 | 0.0008077 | 34.821  | 1.103 | 34.006  | 36.075  | 41.962  | 0.613 | 41.555  | 42.667  |
| 5052 | ENSG00000204406 | MBD5     | -1.2 | 0.0002845 | 0.0021215 | 2.213   | 0.010 | 2.205   | 2.223   | 2.777   | 0.094 | 2.676   | 2.862   |
| 5054 | ENSG00000176055 | MBLAC2   | 1.2  | 0.0166217 | 0.0546932 | 8.046   | 0.707 | 7.288   | 8.688   | 7.034   | 0.597 | 6.439   | 7.633   |
| 5055 | ENSG00000152601 | MBNL1    | 1.2  | 0.004886  | 0.0207786 | 4.595   | 0.590 | 3.923   | 5.025   | 3.830   | 0.393 | 3.398   | 4.167   |
| 5058 | ENSG00000076770 | MBNL3    | -1.1 | 0.0450131 | 0.1171962 | 3.441   | 0.328 | 3.074   | 3.706   | 4.018   | 0.276 | 3.857   | 4.337   |
| 5059 | ENSG00000172197 | MBOAT1   | 1.2  | 0.0237952 | 0.072227  | 21.579  | 0.528 | 21.164  | 22.173  | 19.149  | 0.636 | 18.698  | 19.877  |
| 5060 | ENSG00000125505 | MBOAT7   | -1.1 | 0.0013063 | 0.0072508 | 22.727  | 0.847 | 22.041  | 23.674  | 26.698  | 2.427 | 25.150  | 29.495  |
| 5062 | ENSG00000197971 | MBP      | 1.1  | 0.0233836 | 0.0712973 | 5.272   | 0.346 | 5.050   | 5.671   | 4.874   | 0.219 | 4.725   | 5.125   |
| 5063 | ENSG00000011258 | MBTD1    | -1.1 | 0.0004039 | 0.0028141 | 58.064  | 1.075 | 56.834  | 58.821  | 66.068  | 0.335 | 65.756  | 66.421  |
| 5065 | ENSG00000140943 | MBTPS1   | 1.1  | 0.0683705 | 0.1608742 | 24.453  | 0.598 | 23.764  | 24.819  | 23.638  | 0.103 | 23.557  | 23.755  |
| 5067 | ENSG00000012174 | MBTPS2   | 1.2  | 0.0020445 | 0.0103226 | 7.434   | 0.339 | 7.100   | 7.777   | 6.462   | 0.245 | 6.193   | 6.674   |
| 5072 | ENSG00000076706 | MCAM     | 1.3  | 0.0003438 | 0.0024683 | 10.188  | 1.007 | 9.033   | 10.881  | 8.125   | 1.189 | 7.135   | 9.444   |
| 5077 | ENSG00000100294 | MCAT     | -1.2 | 0.0118064 | 0.0416697 | 7.051   | 1.086 | 5.816   | 7.852   | 8.985   | 0.855 | 8.252   | 9.924   |
| 5078 | ENSG00000078070 | MCCC1    | 1.1  | 0.0104411 | 0.037793  | 23.687  | 0.796 | 22.874  | 24.465  | 21.572  | 1.203 | 20.197  | 22.427  |
| 5083 | ENSG00000131844 | MCCC2    | 1.1  | 0.0008579 | 0.0051656 | 60.512  | 1.072 | 59.288  | 61.285  | 55.683  | 2.704 | 53.498  | 58.707  |
| 5084 | ENSG00000126217 | MCF2L    | -1.3 | 1.453E-05 | 0.0001818 | 2.211   | 0.181 | 2.047   | 2.405   | 2.979   | 0.083 | 2.884   | 3.040   |
| 5086 | ENSG00000128285 | MCHR1    | 2    | 0.0220035 | 0.0678844 | 0.768   | 0.255 | 0.499   | 1.006   | 0.399   | 0.231 | 0.158   | 0.620   |
| 5090 | ENSG00000143384 | MCL1     | 1.3  | 8.56E-12  | 7.42E-10  | 330.426 | 8.792 | 320.285 | 335.904 | 265.889 | 4.973 | 262.030 | 271.501 |
| 5092 | ENSG00000073111 | MCM2     | 1.1  | 0.0003256 | 0.0023598 | 84.231  | 3.254 | 80.539  | 86.680  | 76.841  | 3.385 | 73.094  | 79.677  |
| 5094 | ENSG00000112118 | MCM3     | 1.1  | 0.0450534 | 0.117283  | 293.821 | 9.191 | 284.691 | 303.072 | 285.584 | 9.534 | 274.838 | 293.027 |



|      | A               | B          | C    | D         | E         | F       | G     | H       | I       | J       | K     | L       | M       |
|------|-----------------|------------|------|-----------|-----------|---------|-------|---------|---------|---------|-------|---------|---------|
| 5095 | ENSG00000160294 | MCM3AP     | -1.1 | 0.0002961 | 0.002189  | 38.948  | 2.264 | 36.387  | 40.681  | 44.667  | 0.841 | 43.968  | 45.600  |
| 5098 | ENSG00000215424 | MCM3AP-AS1 | -1.1 | 0.1132602 | 0.2330325 | 3.091   | 0.101 | 2.992   | 3.193   | 3.526   | 0.206 | 3.349   | 3.752   |
| 5099 | ENSG00000076003 | MCM6       | 1.1  | 0.0009822 | 0.0057804 | 103.152 | 6.705 | 95.585  | 108.356 | 93.167  | 6.856 | 85.753  | 99.278  |
| 5100 | ENSG00000166508 | MCM7       | 1.1  | 0.0202734 | 0.0637332 | 193.091 | 9.366 | 182.351 | 199.564 | 184.914 | 8.450 | 175.258 | 190.955 |
| 5101 | ENSG00000153898 | MCOLN2     | 1.2  | 0.0367839 | 0.1004778 | 5.737   | 0.420 | 5.454   | 6.220   | 4.927   | 0.209 | 4.692   | 5.091   |
| 5107 | ENSG00000055732 | MCOLN3     | 2.2  | 2.51E-15  | 5.12E-13  | 11.132  | 1.006 | 9.971   | 11.765  | 5.143   | 0.085 | 5.088   | 5.241   |
| 5108 | ENSG00000225663 | MCRIP1     | 1.1  | 0.0110471 | 0.0394843 | 38.577  | 1.471 | 36.955  | 39.825  | 35.422  | 2.698 | 32.677  | 38.071  |
| 5109 | ENSG00000241418 | MCRIP2P1   | -3.2 | 0.0001252 | 0.0010866 | 1.547   | 0.605 | 0.867   | 2.024   | 5.070   | 1.267 | 3.919   | 6.427   |
| 5111 | ENSG00000050393 | MCUR1      | 1.3  | 3.153E-07 | 7.278E-06 | 24.119  | 1.660 | 22.482  | 25.802  | 19.394  | 0.150 | 19.237  | 19.535  |
| 5112 | ENSG00000137337 | MDC1       | -1.1 | 0.0025558 | 0.0123817 | 42.056  | 2.179 | 39.621  | 43.823  | 47.375  | 1.299 | 46.182  | 48.758  |
| 5113 | ENSG00000112559 | MDFI       | -1.2 | 0.007999  | 0.0305871 | 23.578  | 3.026 | 21.022  | 26.919  | 27.863  | 1.496 | 26.283  | 29.259  |
| 5114 | ENSG00000135272 | MDFIC      | 1.6  | 1.719E-10 | 1.069E-08 | 9.938   | 0.365 | 9.671   | 10.354  | 6.260   | 0.482 | 5.747   | 6.705   |
| 5115 | ENSG00000139915 | MDGA2      | -2.1 | 0.0039844 | 0.0177142 | 0.126   | 0.048 | 0.072   | 0.162   | 0.278   | 0.012 | 0.264   | 0.285   |
| 5119 | ENSG00000014641 | MDH1       | 1.1  | 0.0221151 | 0.0681173 | 172.175 | 3.016 | 169.126 | 175.156 | 165.095 | 1.473 | 163.542 | 166.472 |
| 5120 | ENSG00000146701 | MDH2       | -1.1 | 0.0061658 | 0.0249063 | 138.805 | 5.864 | 132.195 | 143.379 | 154.272 | 6.051 | 147.682 | 159.578 |
| 5123 | ENSG00000110492 | MDK        | 1.1  | 0.0300674 | 0.0864112 | 214.895 | 4.445 | 210.979 | 219.726 | 204.985 | 5.464 | 200.097 | 210.885 |
| 5124 | ENSG00000111554 | MDM1       | 1.1  | 0.0413012 | 0.10959   | 8.224   | 0.469 | 7.689   | 8.567   | 7.445   | 1.023 | 6.472   | 8.511   |
| 5125 | ENSG00000198625 | MDM4       | -1.2 | 0.0003713 | 0.0026278 | 8.997   | 0.199 | 8.838   | 9.220   | 10.869  | 0.265 | 10.637  | 11.158  |
| 5127 | ENSG00000065833 | ME1        | 1.7  | 1.13E-11  | 9.456E-10 | 18.305  | 1.522 | 17.148  | 20.029  | 10.819  | 0.401 | 10.439  | 11.238  |
| 5132 | ENSG00000082212 | ME2        | -1.1 | 0.0041745 | 0.0183765 | 18.080  | 0.173 | 17.882  | 18.198  | 20.155  | 0.628 | 19.457  | 20.672  |
| 5134 | ENSG00000151376 | ME3        | 1.5  | 0.0184532 | 0.0591962 | 1.364   | 0.097 | 1.269   | 1.463   | 0.938   | 0.141 | 0.783   | 1.060   |
| 5137 | ENSG00000163875 | MEAF6      | 1.1  | 0.1007648 | 0.2142615 | 27.481  | 0.812 | 26.661  | 28.284  | 26.078  | 1.894 | 24.848  | 28.259  |
| 5143 | ENSG00000169057 | MECP2      | 1.1  | 0.0571284 | 0.1404158 | 6.074   | 0.324 | 5.804   | 6.433   | 5.740   | 0.378 | 5.310   | 6.021   |
| 5144 | ENSG00000116353 | MECR       | 1.2  | 0.0027808 | 0.0132784 | 17.233  | 0.360 | 16.828  | 17.516  | 15.022  | 0.785 | 14.425  | 15.911  |
| 5147 | ENSG00000125686 | MED1       | -1.1 | 0.0039945 | 0.0177507 | 32.944  | 0.856 | 32.249  | 33.900  | 36.905  | 0.543 | 36.383  | 37.467  |
| 5152 | ENSG00000133398 | MED10      | -1.1 | 0.0363937 | 0.099729  | 22.401  | 0.558 | 21.952  | 23.025  | 25.918  | 1.659 | 24.292  | 27.607  |
| 5153 | ENSG00000161920 | MED11      | -1.1 | 0.0973419 | 0.2092455 | 16.413  | 1.295 | 15.104  | 17.693  | 19.137  | 2.288 | 16.508  | 20.677  |
| 5154 | ENSG00000184634 | MED12      | -1.1 | 0.0025456 | 0.0123426 | 18.752  | 1.720 | 17.101  | 20.534  | 21.737  | 0.959 | 20.813  | 22.728  |
| 5157 | ENSG00000108510 | MED13      | -1.2 | 9.302E-06 | 0.0001256 | 19.962  | 0.865 | 19.004  | 20.684  | 24.580  | 2.332 | 22.051  | 26.645  |
| 5158 | ENSG00000123066 | MED13L     | -1.2 | 4.684E-05 | 0.000486  | 15.292  | 0.113 | 15.191  | 15.415  | 18.010  | 0.658 | 17.326  | 18.638  |
| 5159 | ENSG00000130772 | MED18      | -1.2 | 0.0026262 | 0.0126907 | 16.236  | 1.015 | 15.570  | 17.404  | 20.039  | 0.739 | 19.366  | 20.830  |
| 5160 | ENSG00000124641 | MED20      | -1.2 | 0.0003201 | 0.0023256 | 27.674  | 1.986 | 25.403  | 29.088  | 33.509  | 1.743 | 31.505  | 34.671  |
| 5161 | ENSG00000164758 | MED30      | -1.1 | 0.0297496 | 0.0856871 | 20.364  | 0.798 | 19.451  | 20.930  | 23.895  | 0.754 | 23.411  | 24.763  |
| 5162 | ENSG00000136146 | MED4       | -1.1 | 0.0838288 | 0.1881865 | 72.015  | 4.294 | 67.163  | 75.325  | 78.667  | 4.071 | 74.750  | 82.877  |
| 5165 | ENSG00000133997 | MED6       | -1.1 | 0.0315638 | 0.0898263 | 13.646  | 0.220 | 13.403  | 13.832  | 15.493  | 0.797 | 14.828  | 16.376  |
| 5166 | ENSG00000102802 | MEDAG      | -1.2 | 0.0613927 | 0.1481642 | 5.802   | 0.263 | 5.597   | 6.099   | 6.966   | 0.693 | 6.257   | 7.642   |
| 5167 | ENSG00000068305 | MEF2A      | 1.1  | 0.0961545 | 0.2075637 | 11.962  | 0.546 | 11.338  | 12.353  | 11.314  | 0.096 | 11.225  | 11.415  |
| 5170 | ENSG00000145794 | MEGF10     | -1.3 | 1.161E-06 | 2.15E-05  | 10.990  | 0.293 | 10.735  | 11.311  | 14.226  | 0.427 | 13.748  | 14.569  |
| 5171 | ENSG00000162591 | MEGF6      | -1.1 | 0.0995282 | 0.2125673 | 7.785   | 0.197 | 7.598   | 7.992   | 8.724   | 1.233 | 7.350   | 9.732   |
| 5173 | ENSG00000105429 | MEGF8      | -1.1 | 0.1057093 | 0.2217914 | 26.034  | 2.098 | 23.759  | 27.893  | 28.410  | 2.439 | 26.577  | 31.178  |
| 5175 | ENSG00000162039 | MEIOB      | -1.2 | 0.0395774 | 0.1060476 | 10.640  | 1.448 | 9.024   | 11.818  | 13.004  | 0.783 | 12.184  | 13.744  |
| 5178 | ENSG00000105419 | MEIS3      | 1.4  | 4.527E-08 | 1.372E-06 | 15.585  | 0.425 | 15.339  | 16.075  | 11.060  | 0.309 | 10.703  | 11.252  |

|      | A               | B       | C    | D         | E         | F       | G      | H       | I       | J       | K     | L       | M       |
|------|-----------------|---------|------|-----------|-----------|---------|--------|---------|---------|---------|-------|---------|---------|
| 5183 | ENSG00000165304 | MELK    | -1.2 | 3.436E-05 | 0.0003738 | 55.279  | 1.052  | 54.463  | 56.467  | 67.381  | 6.831 | 61.759  | 74.983  |
| 5185 | ENSG00000117899 | MESDC2  | 1.1  | 0.0039971 | 0.0177574 | 19.776  | 1.148  | 18.598  | 20.892  | 17.935  | 1.209 | 16.978  | 19.294  |
| 5186 | ENSG00000106484 | MEST    | -1.1 | 0.0084682 | 0.0319156 | 89.974  | 2.014  | 88.249  | 92.187  | 98.984  | 2.063 | 97.230  | 101.258 |
| 5187 | ENSG00000105976 | MET     | 1.1  | 0.0319377 | 0.0906617 | 7.300   | 0.813  | 6.688   | 8.222   | 6.496   | 0.910 | 5.453   | 7.126   |
| 5188 | ENSG00000176845 | METRNL  | 1.1  | 0.0517498 | 0.130361  | 17.934  | 0.881  | 17.020  | 18.779  | 16.340  | 0.616 | 15.849  | 17.032  |
| 5192 | ENSG00000037897 | METTL1  | 1.3  | 0.0008299 | 0.0050222 | 9.513   | 0.679  | 8.844   | 10.203  | 7.275   | 0.387 | 6.952   | 7.704   |
| 5194 | ENSG00000214756 | METTL12 | -1.3 | 0.0285565 | 0.0830799 | 2.186   | 0.407  | 1.716   | 2.432   | 2.925   | 0.350 | 2.553   | 3.249   |
| 5195 | ENSG00000010165 | METTL13 | -1.1 | 0.0325276 | 0.0919198 | 34.266  | 0.658  | 33.547  | 34.838  | 38.052  | 2.652 | 35.020  | 39.945  |
| 5197 | ENSG00000127804 | METTL16 | -1.2 | 5.64E-07  | 1.192E-05 | 21.412  | 1.155  | 20.079  | 22.126  | 26.868  | 1.274 | 25.553  | 28.097  |
| 5198 | ENSG00000067365 | METTL22 | -1.2 | 0.0003423 | 0.002458  | 9.334   | 0.737  | 8.640   | 10.108  | 11.335  | 0.447 | 10.875  | 11.767  |
| 5200 | ENSG00000181038 | METTL23 | -1.2 | 0.0086611 | 0.0324442 | 26.426  | 0.483  | 25.921  | 26.883  | 31.393  | 2.847 | 28.155  | 33.502  |
| 5202 | ENSG00000130731 | METTL26 | -1.1 | 0.0111472 | 0.0397732 | 35.345  | 1.153  | 34.047  | 36.249  | 41.439  | 3.897 | 38.104  | 45.723  |
| 5207 | ENSG00000165819 | METTL3  | -1.2 | 1.938E-05 | 0.0002317 | 47.745  | 0.904  | 46.713  | 48.397  | 56.204  | 0.680 | 55.432  | 56.714  |
| 5208 | ENSG00000101574 | METTL4  | 1.1  | 0.0311812 | 0.0889171 | 8.969   | 0.589  | 8.303   | 9.421   | 8.133   | 0.557 | 7.705   | 8.763   |
| 5209 | ENSG00000185432 | METTL7A | -1.2 | 0.0581223 | 0.1422404 | 2.624   | 0.470  | 2.171   | 3.110   | 3.254   | 0.118 | 3.119   | 3.333   |
| 5214 | ENSG00000170439 | METTL7B | 2.4  | 1.438E-08 | 5.089E-07 | 13.244  | 2.957  | 10.686  | 16.481  | 5.634   | 1.151 | 4.673   | 6.909   |
| 5218 | ENSG00000123600 | METTL8  | -1.1 | 0.0125231 | 0.0436437 | 13.620  | 1.836  | 12.422  | 15.733  | 15.759  | 1.100 | 14.499  | 16.525  |
| 5220 | ENSG00000254726 | MEX3A   | -1.1 | 0.0001394 | 0.0011827 | 53.833  | 2.395  | 51.304  | 56.066  | 62.211  | 1.694 | 60.334  | 63.626  |
| 5221 | ENSG00000183496 | MEX3B   | -1.1 | 0.0840822 | 0.1885301 | 7.160   | 0.433  | 6.691   | 7.545   | 8.232   | 1.062 | 7.473   | 9.446   |
| 5222 | ENSG00000176624 | MEX3C   | -1.1 | 0.0560492 | 0.1385098 | 41.280  | 2.699  | 38.177  | 43.084  | 44.906  | 1.665 | 43.158  | 46.474  |
| 5226 | ENSG00000117122 | MFAP2   | -1.1 | 0.0228995 | 0.0700869 | 47.670  | 2.290  | 45.534  | 50.088  | 53.295  | 3.204 | 49.847  | 56.180  |
| 5228 | ENSG00000168958 | MFF     | 1.1  | 0.0602721 | 0.146169  | 35.850  | 1.814  | 34.052  | 37.679  | 34.412  | 1.338 | 33.572  | 35.955  |
| 5233 | ENSG00000140545 | MFGE8   | -1.2 | 1.886E-08 | 6.417E-07 | 283.280 | 21.748 | 261.925 | 305.401 | 350.741 | 9.338 | 345.222 | 361.523 |
| 5234 | ENSG00000147324 | MFHAS1  | -1.3 | 7.513E-09 | 2.888E-07 | 34.738  | 1.667  | 33.720  | 36.661  | 46.350  | 4.014 | 42.102  | 50.080  |
| 5236 | ENSG00000171109 | MFN1    | -1.1 | 0.0005869 | 0.0038135 | 31.554  | 1.171  | 30.400  | 32.741  | 36.519  | 1.311 | 35.260  | 37.877  |
| 5239 | ENSG00000116688 | MFN2    | 1.1  | 0.0001834 | 0.0014889 | 57.217  | 0.846  | 56.416  | 58.102  | 51.100  | 2.334 | 48.559  | 53.150  |
| 5244 | ENSG00000100060 | MFNG    | -1.5 | 0.0051865 | 0.0217127 | 2.386   | 0.291  | 2.184   | 2.720   | 3.575   | 1.168 | 2.524   | 4.833   |
| 5245 | ENSG00000118855 | MFSD1   | 1.7  | 1.031E-07 | 2.807E-06 | 5.088   | 0.419  | 4.694   | 5.528   | 3.083   | 0.419 | 2.619   | 3.436   |
| 5247 | ENSG00000161091 | MFSD12  | -1.1 | 0.0542998 | 0.1353534 | 15.501  | 0.687  | 14.709  | 15.930  | 17.413  | 1.361 | 15.951  | 18.642  |
| 5249 | ENSG00000148110 | MFSD14B | 1.1  | 0.000165  | 0.0013661 | 53.997  | 2.495  | 51.415  | 56.394  | 48.109  | 0.253 | 47.856  | 48.361  |
| 5252 | ENSG00000168389 | MFSD2A  | 1.2  | 0.0190634 | 0.0607079 | 7.959   | 0.650  | 7.374   | 8.659   | 6.876   | 1.173 | 5.542   | 7.747   |
| 5256 | ENSG00000167700 | MFSD3   | -1.2 | 0.001294  | 0.0072085 | 52.732  | 4.896  | 47.653  | 57.422  | 64.079  | 5.735 | 60.484  | 70.693  |
| 5259 | ENSG00000173214 | MFSD4B  | 1.1  | 0.1059954 | 0.222254  | 3.699   | 0.290  | 3.378   | 3.943   | 3.329   | 0.277 | 3.027   | 3.571   |
| 5260 | ENSG00000182544 | MFSD5   | 1.2  | 0.0184761 | 0.0592279 | 10.560  | 0.330  | 10.182  | 10.794  | 9.126   | 0.873 | 8.120   | 9.687   |
| 5261 | ENSG00000151690 | MFSD6   | 1.3  | 0.0095663 | 0.0351507 | 2.775   | 0.290  | 2.597   | 3.109   | 2.233   | 0.189 | 2.060   | 2.435   |
| 5265 | ENSG00000185156 | MFSD6L  | -1.7 | 1.2E-05   | 0.0001558 | 3.633   | 0.248  | 3.444   | 3.914   | 6.350   | 0.772 | 5.504   | 7.017   |
| 5271 | ENSG00000174197 | MGA     | 1.2  | 1.628E-06 | 2.841E-05 | 16.574  | 0.247  | 16.395  | 16.856  | 14.149  | 0.805 | 13.322  | 14.931  |
| 5272 | ENSG00000137463 | MGARP   | -2.6 | 6.723E-06 | 9.507E-05 | 1.735   | 0.713  | 1.323   | 2.559   | 4.684   | 0.600 | 4.059   | 5.256   |
| 5274 | ENSG00000128268 | MGAT3   | -1.1 | 0.0424315 | 0.1118529 | 9.439   | 0.964  | 8.333   | 10.102  | 10.910  | 1.278 | 10.074  | 12.381  |
| 5279 | ENSG00000071073 | MGAT4A  | 1.1  | 0.0919799 | 0.2013273 | 3.789   | 0.178  | 3.649   | 3.989   | 3.471   | 0.210 | 3.293   | 3.703   |
| 5280 | ENSG00000161013 | MGAT4B  | 1.1  | 0.0016923 | 0.0089388 | 39.328  | 0.720  | 38.772  | 40.141  | 35.012  | 1.940 | 33.499  | 37.200  |
| 5284 | ENSG00000182050 | MGAT4C  | -1.5 | 0.0176959 | 0.0572511 | 0.130   | 0.016  | 0.112   | 0.144   | 0.193   | 0.034 | 0.162   | 0.229   |
| 5290 | ENSG00000167889 | MGAT5B  | -1.2 | 0.0657776 | 0.1562276 | 3.418   | 0.373  | 3.006   | 3.733   | 4.066   | 0.399 | 3.606   | 4.329   |

|      | A               | B         | C    | D         | E         | F        | G      | H        | I        | J        | K       | L        | M        |
|------|-----------------|-----------|------|-----------|-----------|----------|--------|----------|----------|----------|---------|----------|----------|
| 5292 | ENSG00000198408 | MGEA5     | 1.1  | 0.0093838 | 0.0345771 | 129.730  | 2.467  | 127.985  | 132.552  | 123.911  | 4.385   | 119.034  | 127.527  |
| 5293 | ENSG00000125871 | MGME1     | -1.1 | 0.0192722 | 0.0611769 | 63.874   | 0.546  | 63.245   | 64.224   | 71.301   | 3.709   | 67.279   | 74.585   |
| 5294 | ENSG00000170430 | MGMT      | -1.1 | 0.1197282 | 0.2423945 | 10.688   | 0.271  | 10.508   | 11.000   | 11.922   | 0.455   | 11.448   | 12.355   |
| 5296 | ENSG00000008394 | MGST1     | 1.2  | 2.077E-07 | 5.103E-06 | 91.299   | 4.263  | 88.149   | 96.150   | 78.323   | 0.930   | 77.359   | 79.215   |
| 5297 | ENSG00000085871 | MGST2     | 1.2  | 0.1240192 | 0.2490544 | 4.827    | 0.581  | 4.225    | 5.384    | 4.275    | 0.359   | 3.904    | 4.620    |
| 5298 | ENSG00000232442 | MHENCN    | -1.5 | 0.0020561 | 0.0103715 | 8.941    | 1.219  | 7.557    | 9.858    | 13.304   | 1.184   | 12.084   | 14.449   |
| 5300 | ENSG00000225783 | MIAT      | -1.4 | 2.161E-06 | 3.626E-05 | 26.536   | 1.626  | 24.755   | 27.943   | 37.141   | 3.802   | 34.175   | 41.427   |
| 5301 | ENSG00000101752 | MIB1      | -1.1 | 0.0012016 | 0.0068182 | 54.428   | 0.251  | 54.140   | 54.602   | 61.033   | 2.041   | 58.727   | 62.610   |
| 5304 | ENSG00000197530 | MIB2      | -1.1 | 0.061502  | 0.148301  | 5.407    | 0.250  | 5.123    | 5.591    | 6.249    | 1.255   | 5.385    | 7.689    |
| 5305 | ENSG00000204520 | MICA      | 1.2  | 0.0107978 | 0.0387881 | 20.020   | 1.194  | 18.997   | 21.331   | 17.588   | 1.969   | 15.523   | 19.444   |
| 5306 | ENSG00000135596 | MICAL1    | 1.1  | 0.0989306 | 0.2117456 | 27.277   | 1.737  | 25.443   | 28.897   | 26.192   | 1.462   | 24.527   | 27.263   |
| 5307 | ENSG00000133816 | MICAL2    | 1.7  | 0.0053047 | 0.022087  | 0.259    | 0.053  | 0.215    | 0.318    | 0.151    | 0.050   | 0.109    | 0.206    |
| 5308 | ENSG00000107745 | MICU1     | 1.1  | 0.0030585 | 0.0143168 | 43.665   | 1.661  | 41.883   | 45.168   | 39.887   | 0.657   | 39.227   | 40.541   |
| 5309 | ENSG00000155970 | MICU3     | 1.3  | 0.004819  | 0.0205797 | 6.144    | 0.549  | 5.706    | 6.760    | 4.964    | 0.277   | 4.652    | 5.181    |
| 5311 | ENSG00000101871 | MID1      | 1.2  | 6.147E-06 | 8.816E-05 | 28.078   | 3.033  | 26.239   | 31.578   | 23.540   | 0.981   | 22.790   | 24.650   |
| 5313 | ENSG00000167470 | MIDN      | 1.1  | 0.0544987 | 0.1356891 | 57.366   | 1.680  | 55.482   | 58.708   | 54.467   | 5.871   | 50.925   | 61.244   |
| 5317 | ENSG00000100335 | MIEF1     | -1.2 | 1.217E-06 | 2.229E-05 | 19.319   | 0.331  | 18.990   | 19.653   | 24.612   | 2.017   | 22.283   | 25.801   |
| 5318 | ENSG00000198160 | MIER1     | -1.1 | 0.0134237 | 0.0462113 | 14.325   | 0.455  | 13.858   | 14.767   | 16.280   | 0.888   | 15.280   | 16.976   |
| 5322 | ENSG00000105556 | MIER2     | -1.1 | 0.0457874 | 0.1187732 | 8.498    | 0.353  | 8.220    | 8.895    | 9.518    | 0.126   | 9.375    | 9.614    |
| 5325 | ENSG00000240972 | MIF       | -1.1 | 0.0003209 | 0.0023297 | 389.254  | 10.098 | 378.231  | 398.058  | 442.864  | 8.464   | 434.110  | 451.004  |
| 5326 | ENSG00000125457 | MIF4GD    | 1.1  | 0.0673093 | 0.1591503 | 24.177   | 0.807  | 23.689   | 25.109   | 22.294   | 1.145   | 21.491   | 23.604   |
| 5328 | ENSG00000148343 | MIGA2     | -1.2 | 0.0004257 | 0.0029356 | 9.833    | 0.489  | 9.278    | 10.198   | 12.380   | 0.619   | 11.837   | 13.054   |
| 5329 | ENSG00000116691 | MIIP      | -1.1 | 0.0728345 | 0.1689549 | 27.859   | 1.570  | 26.142   | 29.223   | 31.537   | 4.142   | 28.296   | 36.203   |
| 5330 | ENSG00000141503 | MINK1     | -1.1 | 0.0056651 | 0.0233236 | 20.645   | 1.641  | 19.561   | 22.533   | 23.891   | 1.779   | 22.203   | 25.750   |
| 5331 | ENSG00000107789 | MINPP1    | -1.2 | 0.0031546 | 0.0146819 | 24.862   | 1.553  | 23.069   | 25.766   | 29.610   | 2.518   | 26.930   | 31.928   |
| 5332 | ENSG00000255248 | MIR100HG  | 1.5  | 0.0002482 | 0.0018977 | 1.224    | 0.088  | 1.123    | 1.287    | 0.822    | 0.059   | 0.762    | 0.879    |
| 5335 | ENSG00000283498 | MIR1244-2 | 1.1  | 0.0768182 | 0.1757135 | 4811.022 | 84.361 | 4724.753 | 4893.336 | 4665.037 | 214.466 | 4422.724 | 4830.454 |
| 5336 | ENSG00000230937 | MIR205HG  | -1.7 | 1.305E-07 | 3.437E-06 | 4.492    | 0.848  | 3.528    | 5.120    | 7.995    | 0.894   | 7.335    | 9.013    |
| 5337 | ENSG00000247095 | MIR210HG  | -1.6 | 0.0034086 | 0.0156106 | 1.764    | 0.441  | 1.348    | 2.226    | 2.911    | 0.732   | 2.085    | 3.479    |
| 5338 | ENSG00000270069 | MIR222HG  | 1.2  | 0.055924  | 0.1383215 | 13.955   | 1.767  | 11.928   | 15.172   | 12.366   | 1.461   | 11.175   | 13.996   |
| 5339 | ENSG00000207547 | MIR25     | -1.6 | 0.0028888 | 0.0136439 | 44.072   | 9.224  | 36.935   | 54.488   | 72.475   | 9.559   | 61.589   | 79.499   |
| 5340 | ENSG00000207927 | MIR302A   | -1.5 | 0.0079011 | 0.0303622 | 72.242   | 11.931 | 62.617   | 85.591   | 113.880  | 35.342  | 77.066   | 147.538  |
| 5341 | ENSG00000199102 | MIR302C   | -1.4 | 0.0090404 | 0.0335456 | 110.356  | 4.195  | 107.357  | 115.150  | 155.127  | 19.969  | 142.345  | 178.138  |
| 5342 | ENSG00000199145 | MIR302D   | -1.3 | 0.0156436 | 0.0521547 | 156.749  | 26.525 | 127.076  | 178.157  | 206.363  | 28.075  | 179.158  | 235.233  |
| 5343 | ENSG00000228526 | MIR34AHG  | -1.2 | 0.0169469 | 0.0554942 | 25.383   | 3.420  | 21.881   | 28.715   | 30.546   | 1.974   | 28.267   | 31.718   |

|      | A               | B           | C    | D         | E         | F       | G      | H       | I       | J       | K      | L       | M       |
|------|-----------------|-------------|------|-----------|-----------|---------|--------|---------|---------|---------|--------|---------|---------|
| 5344 | ENSG00000172965 | MIR4435-2HG | 1.7  | 6.326E-08 | 1.82E-06  | 4.360   | 0.633  | 3.952   | 5.089   | 2.684   | 0.243  | 2.421   | 2.899   |
| 5345 | ENSG00000223749 | MIR503HG    | 1.5  | 0.0380967 | 0.1029775 | 2.442   | 0.095  | 2.377   | 2.552   | 1.696   | 0.523  | 1.094   | 2.036   |
| 5347 | ENSG00000207652 | MIR621      | 1.4  | 0.0030609 | 0.0143208 | 135.825 | 24.623 | 107.727 | 153.641 | 95.830  | 17.833 | 76.490  | 111.621 |
| 5350 | ENSG00000255571 | MIR9-3HG    | 1.3  | 0.0641724 | 0.1532977 | 0.829   | 0.088  | 0.732   | 0.902   | 0.635   | 0.162  | 0.495   | 0.812   |
| 5354 | ENSG00000167842 | MIS12       | -1.1 | 0.0028264 | 0.0134277 | 31.747  | 0.464  | 31.383  | 32.270  | 36.765  | 1.266  | 35.910  | 38.220  |
| 5356 | ENSG00000158411 | MITD1       | 1.1  | 0.0406754 | 0.1084058 | 25.562  | 1.984  | 23.954  | 27.780  | 23.893  | 1.098  | 23.215  | 25.159  |
| 5359 | ENSG00000148773 | MKI67       | -1.2 | 3.058E-07 | 7.124E-06 | 86.653  | 1.927  | 84.677  | 88.527  | 103.953 | 4.396  | 99.058  | 107.563 |
| 5361 | ENSG00000128585 | MKLN1       | -1.1 | 0.0633916 | 0.1519906 | 21.537  | 0.628  | 20.963  | 22.207  | 23.399  | 1.531  | 21.707  | 24.687  |
| 5363 | ENSG00000099875 | MKNK2       | -1.1 | 0.0067838 | 0.0267947 | 53.848  | 0.368  | 53.482  | 54.218  | 60.563  | 3.774  | 57.760  | 64.854  |
| 5366 | ENSG00000133606 | MKRN1       | 1.1  | 0.0500289 | 0.1269906 | 62.415  | 2.984  | 59.194  | 65.085  | 59.994  | 0.991  | 58.871  | 60.741  |
| 5367 | ENSG00000110917 | MLEC        | 1.1  | 0.0171682 | 0.0559794 | 169.053 | 3.333  | 165.521 | 172.143 | 162.871 | 6.183  | 157.217 | 169.473 |
| 5368 | ENSG00000076242 | MLH1        | 1.1  | 0.0008872 | 0.0052985 | 42.806  | 1.091  | 41.551  | 43.531  | 38.464  | 1.017  | 37.422  | 39.454  |
| 5370 | ENSG00000130382 | MLLT1       | -1.2 | 0.0006599 | 0.0041836 | 25.122  | 1.172  | 24.171  | 26.431  | 29.694  | 1.142  | 28.483  | 30.752  |
| 5371 | ENSG00000078403 | MLLT10      | 1.1  | 0.1139153 | 0.2338844 | 34.462  | 1.335  | 33.208  | 35.866  | 33.387  | 1.502  | 31.954  | 34.950  |
| 5376 | ENSG00000213190 | MLLT11      | 1.1  | 0.0037047 | 0.0166685 | 25.517  | 0.305  | 25.181  | 25.777  | 23.044  | 0.823  | 22.402  | 23.971  |
| 5377 | ENSG00000171843 | MLLT3       | -1.3 | 0.0007147 | 0.0044391 | 3.134   | 0.199  | 2.926   | 3.324   | 4.107   | 0.416  | 3.706   | 4.537   |
| 5378 | ENSG00000275023 | MLLT6       | -1.2 | 0.0317563 | 0.090283  | 1.671   | 0.218  | 1.470   | 1.902   | 2.034   | 0.262  | 1.742   | 2.249   |
| 5379 | ENSG00000115648 | MLPH        | -1.4 | 7.045E-07 | 1.428E-05 | 5.564   | 0.391  | 5.175   | 5.958   | 7.958   | 0.635  | 7.420   | 8.659   |
| 5380 | ENSG00000108788 | MLX         | -1.1 | 0.0707729 | 0.1651466 | 16.492  | 1.691  | 14.902  | 18.269  | 18.474  | 1.065  | 17.247  | 19.169  |
| 5382 | ENSG00000009950 | MLXIPL      | -1.4 | 2.565E-05 | 0.0002933 | 6.245   | 0.602  | 5.673   | 6.873   | 8.722   | 0.301  | 8.492   | 9.062   |
| 5383 | ENSG00000103150 | MLYCD       | -1.1 | 0.1001437 | 0.2134774 | 1.873   | 0.135  | 1.718   | 1.964   | 2.145   | 0.195  | 1.970   | 2.354   |
| 5384 | ENSG00000139428 | MMAB        | 1.6  | 6.24E-11  | 4.254E-09 | 13.925  | 0.640  | 13.262  | 14.539  | 8.997   | 0.776  | 8.197   | 9.747   |
| 5385 | ENSG00000132763 | MMACHC      | -1.2 | 0.0041372 | 0.0182554 | 3.814   | 0.240  | 3.571   | 4.051   | 4.838   | 0.267  | 4.569   | 5.102   |
| 5386 | ENSG00000168288 | MMADHC      | -1.1 | 5.667E-05 | 0.0005678 | 153.530 | 6.864  | 146.469 | 160.179 | 178.502 | 1.512  | 176.847 | 179.812 |
| 5388 | ENSG00000196549 | MME         | 1.2  | 1.379E-06 | 2.489E-05 | 11.840  | 0.410  | 11.549  | 12.309  | 9.703   | 0.085  | 9.605   | 9.755   |
| 5390 | ENSG00000240666 | MME-AS1     | 3.2  | 2.164E-07 | 5.279E-06 | 8.349   | 1.101  | 7.133   | 9.278   | 2.669   | 1.178  | 1.612   | 3.939   |
| 5391 | ENSG00000142606 | MMEL1       | 1.3  | 0.0600094 | 0.1456363 | 1.721   | 0.375  | 1.460   | 2.151   | 1.318   | 0.351  | 0.955   | 1.656   |
| 5392 | ENSG00000169446 | MMGT1       | -1.1 | 0.0737283 | 0.1703971 | 27.606  | 0.121  | 27.530  | 27.746  | 30.513  | 1.481  | 28.833  | 31.631  |
| 5394 | ENSG00000166670 | MMP10       | 4.5  | 0.0865804 | 0.1925489 | 0.168   | 0.084  | 0.085   | 0.252   | 0.030   | 0.051  | 0.000   | 0.089   |
| 5395 | ENSG00000099953 | MMP11       | -1.3 | 0.0012219 | 0.0068954 | 4.882   | 0.538  | 4.289   | 5.338   | 6.417   | 0.353  | 6.062   | 6.768   |
| 5396 | ENSG00000102996 | MMP15       | -1.2 | 0.0027798 | 0.0132772 | 40.408  | 2.844  | 37.153  | 42.413  | 47.824  | 4.948  | 44.527  | 53.513  |
| 5398 | ENSG00000156103 | MMP16       | -1.7 | 1.124E-06 | 2.103E-05 | 12.109  | 1.385  | 11.043  | 13.674  | 20.970  | 2.574  | 18.318  | 23.459  |
| 5399 | ENSG00000123342 | MMP19       | 1.8  | 0.0001505 | 0.0012619 | 1.785   | 0.425  | 1.531   | 2.275   | 1.026   | 0.197  | 0.803   | 1.179   |
| 5400 | ENSG00000087245 | MMP2        | 1.2  | 6.454E-05 | 0.0006325 | 23.021  | 2.178  | 20.635  | 24.902  | 19.192  | 1.366  | 17.630  | 20.163  |
| 5401 | ENSG00000125966 | MMP24       | 1.8  | 8.786E-09 | 3.324E-07 | 41.944  | 6.216  | 34.854  | 46.457  | 23.651  | 1.401  | 22.060  | 24.696  |
| 5402 | ENSG00000100985 | MMP9        | -1.6 | 0.0130191 | 0.045075  | 1.331   | 0.163  | 1.212   | 1.517   | 2.131   | 0.244  | 1.857   | 2.327   |
| 5403 | ENSG00000155229 | MMS19       | -1.1 | 0.0653097 | 0.1553303 | 65.157  | 1.125  | 64.495  | 66.456  | 70.145  | 0.667  | 69.549  | 70.866  |
| 5405 | ENSG00000146263 | MMS22L      | 1.1  | 0.0950979 | 0.2059927 | 6.275   | 0.272  | 6.037   | 6.572   | 6.037   | 0.101  | 5.971   | 6.153   |
| 5406 | ENSG00000138587 | MNS1        | 1.2  | 0.0639641 | 0.152973  | 7.969   | 0.900  | 7.017   | 8.806   | 6.788   | 1.219  | 5.434   | 7.798   |
| 5408 | ENSG00000070444 | MNT         | 1.1  | 0.0741516 | 0.1710251 | 7.190   | 0.229  | 6.936   | 7.380   | 6.661   | 0.703  | 5.927   | 7.329   |

|      | A               | B             | C    | D         | E         | F       | G      | H       | I       | J       | K      | L       | M       |
|------|-----------------|---------------|------|-----------|-----------|---------|--------|---------|---------|---------|--------|---------|---------|
| 5409 | ENSG00000182208 | MOB2          | -1.1 | 0.1111554 | 0.2301349 | 6.248   | 0.211  | 6.010   | 6.414   | 7.085   | 0.148  | 6.954   | 7.245   |
| 5412 | ENSG00000142961 | MOB3C         | 1.3  | 0.0085944 | 0.0322584 | 3.288   | 0.118  | 3.194   | 3.421   | 2.658   | 0.324  | 2.285   | 2.861   |
| 5416 | ENSG00000075643 | MOCOS         | 1.5  | 4.274E-08 | 1.312E-06 | 8.718   | 0.356  | 8.368   | 9.079   | 5.977   | 0.489  | 5.415   | 6.300   |
| 5417 | ENSG00000164172 | MOCOS2        | 1.2  | 0.0003235 | 0.0023472 | 9.291   | 0.380  | 9.048   | 9.728   | 7.716   | 0.360  | 7.303   | 7.963   |
| 5420 | ENSG00000115275 | MOGS          | -1.1 | 0.0215705 | 0.0669151 | 37.369  | 1.601  | 35.703  | 38.897  | 42.214  | 4.274  | 38.961  | 47.055  |
| 5421 | ENSG00000133131 | MORC4         | 1.3  | 0.0023879 | 0.0117132 | 3.826   | 0.630  | 3.414   | 4.552   | 3.025   | 0.135  | 2.922   | 3.177   |
| 5426 | ENSG00000185787 | MORF4L1       | -1.1 | 0.0023758 | 0.0116674 | 108.746 | 1.167  | 107.510 | 109.829 | 120.907 | 3.043  | 118.236 | 124.220 |
| 5428 | ENSG00000218283 | MORF4L1P<br>1 | -1.1 | 0.0162419 | 0.0537467 | 871.823 | 24.421 | 848.385 | 897.120 | 947.424 | 19.116 | 926.564 | 964.105 |
| 5430 | ENSG00000171160 | MORN4         | 1.2  | 0.0029806 | 0.0140107 | 34.125  | 1.119  | 33.347  | 35.408  | 29.915  | 1.784  | 28.017  | 31.557  |
| 5432 | ENSG00000130150 | MOSPD2        | 1.2  | 1.385E-05 | 0.0001757 | 27.008  | 0.337  | 26.631  | 27.279  | 22.776  | 1.541  | 21.596  | 24.520  |
| 5433 | ENSG00000155363 | MOV10         | -1.1 | 0.0443225 | 0.1157724 | 23.026  | 1.461  | 21.526  | 24.446  | 25.491  | 0.610  | 24.998  | 26.174  |
| 5434 | ENSG00000079931 | MOXD1         | 1.2  | 0.0341521 | 0.0953159 | 6.046   | 0.387  | 5.722   | 6.474   | 5.366   | 0.297  | 5.082   | 5.675   |
| 5441 | ENSG00000060762 | MPC1          | 1.3  | 0.0018494 | 0.0095651 | 13.700  | 0.188  | 13.492  | 13.857  | 10.523  | 0.379  | 10.146  | 10.903  |
| 5442 | ENSG00000143158 | MPC2          | 1.2  | 0.0011396 | 0.0065271 | 31.614  | 0.401  | 31.262  | 32.050  | 27.690  | 1.094  | 26.781  | 28.904  |
| 5444 | ENSG00000129255 | MPDU1         | 1.1  | 0.0928583 | 0.2025032 | 32.780  | 2.066  | 30.748  | 34.879  | 31.257  | 0.172  | 31.060  | 31.375  |
| 5445 | ENSG00000107186 | MPDZ          | 1.1  | 0.0020133 | 0.0102128 | 40.649  | 0.708  | 39.920  | 41.335  | 37.890  | 1.225  | 36.752  | 39.187  |
| 5446 | ENSG00000135698 | MPHOSPH<br>6  | -1.1 | 0.0219488 | 0.067815  | 34.769  | 1.494  | 33.641  | 36.464  | 39.665  | 1.706  | 37.873  | 41.271  |
| 5449 | ENSG00000051825 | MPHOSPH<br>9  | -1.1 | 0.0566798 | 0.1395379 | 13.000  | 0.650  | 12.337  | 13.636  | 14.403  | 0.937  | 13.448  | 15.322  |
| 5451 | ENSG00000178802 | MPI           | -1.2 | 0.0005221 | 0.0034706 | 7.644   | 0.812  | 6.708   | 8.162   | 9.424   | 0.126  | 9.327   | 9.566   |
| 5452 | ENSG00000168303 | MPLKIP        | -1.1 | 0.0206112 | 0.0646148 | 13.470  | 0.660  | 12.755  | 14.056  | 15.165  | 1.088  | 14.473  | 16.419  |
| 5453 | ENSG00000008382 | MPND          | -1.1 | 0.0581699 | 0.1423153 | 20.813  | 2.007  | 18.759  | 22.770  | 23.840  | 1.577  | 22.814  | 25.656  |
| 5454 | ENSG00000130830 | MPP1          | 1.8  | 3.56E-13  | 4.24E-11  | 14.792  | 0.890  | 14.091  | 15.793  | 8.330   | 0.597  | 7.918   | 9.014   |
| 5455 | ENSG00000161647 | MPP3          | -1.2 | 0.0491602 | 0.1254996 | 3.001   | 0.068  | 2.926   | 3.059   | 3.658   | 0.193  | 3.448   | 3.828   |
| 5456 | ENSG00000150054 | MPP7          | 1.2  | 0.0180925 | 0.0583383 | 8.238   | 0.443  | 7.925   | 8.744   | 7.309   | 0.830  | 6.699   | 8.254   |
| 5459 | ENSG00000133030 | MPRIP         | -1   | 0.0885861 | 0.195825  | 23.673  | 0.201  | 23.447  | 23.834  | 25.358  | 0.558  | 24.804  | 25.919  |
| 5460 | ENSG00000128309 | MPST          | -1.1 | 0.0303958 | 0.0871033 | 18.768  | 0.788  | 17.918  | 19.473  | 20.933  | 1.427  | 19.886  | 22.558  |
| 5463 | ENSG00000115204 | MPV17         | 1.2  | 0.000531  | 0.0035163 | 15.290  | 0.336  | 14.991  | 15.654  | 13.074  | 0.322  | 12.876  | 13.445  |
| 5464 | ENSG00000156968 | MPV17L        | 1.2  | 0.0344263 | 0.0957493 | 4.202   | 0.324  | 3.833   | 4.438   | 3.686   | 0.162  | 3.540   | 3.860   |
| 5469 | ENSG00000197965 | MPZL1         | 1.1  | 0.0066367 | 0.026386  | 49.042  | 1.025  | 47.884  | 49.835  | 46.232  | 0.945  | 45.355  | 47.234  |
| 5471 | ENSG00000160588 | MPZL3         | 1.2  | 0.04539   | 0.1179431 | 3.496   | 0.370  | 3.191   | 3.907   | 2.910   | 0.346  | 2.523   | 3.193   |
| 5472 | ENSG00000135324 | MRAP2         | 1.3  | 0.0020085 | 0.010201  | 9.748   | 0.572  | 9.121   | 10.241  | 7.659   | 0.621  | 7.054   | 8.295   |
| 5475 | ENSG00000158186 | MRAS          | 1.1  | 0.0492738 | 0.1256964 | 5.980   | 0.331  | 5.618   | 6.267   | 5.363   | 0.535  | 4.865   | 5.929   |
| 5479 | ENSG00000011028 | MRC2          | 1.2  | 0.0070302 | 0.0276003 | 11.669  | 1.067  | 10.438  | 12.340  | 10.156  | 1.105  | 8.953   | 11.126  |
| 5482 | ENSG00000179010 | MRFAP1        | -1.1 | 0.0039853 | 0.0177142 | 270.955 | 2.174  | 268.491 | 272.606 | 298.437 | 7.165  | 290.770 | 304.963 |
| 5485 | ENSG00000101189 | MRGBP         | -1.2 | 0.0063449 | 0.0254475 | 16.583  | 0.575  | 15.937  | 17.042  | 19.625  | 0.436  | 19.143  | 19.992  |
| 5489 | ENSG00000037757 | MRI1          | -1.1 | 0.0717497 | 0.1669423 | 11.286  | 0.236  | 11.079  | 11.542  | 12.850  | 0.830  | 11.908  | 13.473  |
| 5491 | ENSG00000171861 | MIRM3         | -1.1 | 0.0444161 | 0.1159033 | 15.944  | 1.067  | 14.718  | 16.659  | 18.373  | 0.892  | 17.456  | 19.237  |

|      | A               | B        | C    | D         | E         | F       | G      | H       | I       | J       | K      | L       | M       |
|------|-----------------|----------|------|-----------|-----------|---------|--------|---------|---------|---------|--------|---------|---------|
| 5492 | ENSG00000161010 | MRNIP    | -1.3 | 2.718E-07 | 6.457E-06 | 6.838   | 0.073  | 6.760   | 6.905   | 9.415   | 0.556  | 8.839   | 9.950   |
| 5493 | ENSG00000169288 | MRPL1    | 1.5  | 5.773E-10 | 3.004E-08 | 37.807  | 1.467  | 36.192  | 39.058  | 25.516  | 1.665  | 24.309  | 27.415  |
| 5495 | ENSG00000174547 | MRPL11   | 1.1  | 0.017541  | 0.0568534 | 68.701  | 0.908  | 67.950  | 69.709  | 64.691  | 2.533  | 62.049  | 67.099  |
| 5496 | ENSG00000137547 | MRPL15   | 1.2  | 2.514E-05 | 0.0002887 | 138.911 | 4.531  | 136.226 | 144.142 | 119.023 | 5.303  | 112.921 | 122.519 |
| 5497 | ENSG00000115364 | MRPL19   | -1.1 | 0.0010651 | 0.0061926 | 51.916  | 2.003  | 50.060  | 54.039  | 59.069  | 1.855  | 57.752  | 61.191  |
| 5498 | ENSG00000214026 | MRPL23   | -1.1 | 0.0525743 | 0.1320839 | 15.820  | 0.348  | 15.575  | 16.219  | 17.879  | 0.548  | 17.279  | 18.353  |
| 5501 | ENSG00000086504 | MRPL28   | -1.1 | 0.0002708 | 0.0020387 | 75.338  | 1.524  | 73.747  | 76.786  | 88.112  | 3.601  | 84.575  | 91.774  |
| 5503 | ENSG00000106591 | MRPL32   | -1.2 | 3.375E-06 | 5.285E-05 | 49.820  | 1.420  | 48.536  | 51.346  | 61.145  | 1.169  | 60.143  | 62.429  |
| 5507 | ENSG00000243147 | MRPL33   | -1.1 | 0.0310915 | 0.0887812 | 68.112  | 0.964  | 67.102  | 69.023  | 76.476  | 4.422  | 71.950  | 80.787  |
| 5512 | ENSG00000130312 | MRPL34   | -1.1 | 0.031146  | 0.0888619 | 52.944  | 2.567  | 50.879  | 55.819  | 59.310  | 2.495  | 57.477  | 62.151  |
| 5514 | ENSG00000116221 | MRPL37   | -1.1 | 0.0825053 | 0.1858815 | 96.586  | 3.216  | 92.933  | 98.990  | 104.128 | 1.474  | 102.599 | 105.540 |
| 5520 | ENSG00000105364 | MRPL4    | -1.1 | 0.102054  | 0.2162685 | 34.877  | 0.301  | 34.535  | 35.102  | 37.931  | 1.677  | 36.740  | 39.849  |
| 5522 | ENSG00000198015 | MRPL42   | -1.2 | 0.0001014 | 0.0009146 | 22.696  | 0.618  | 22.294  | 23.408  | 26.732  | 1.680  | 25.654  | 28.668  |
| 5531 | ENSG00000055950 | MRPL43   | -1.2 | 0.0004989 | 0.0033499 | 24.734  | 0.922  | 24.065  | 25.785  | 29.413  | 0.928  | 28.352  | 30.072  |
| 5532 | ENSG00000135900 | MRPL44   | -1.2 | 4.297E-05 | 0.0004523 | 64.653  | 1.433  | 63.518  | 66.263  | 78.525  | 3.515  | 74.621  | 81.439  |
| 5536 | ENSG00000228782 | MRPL45P2 | -1.2 | 0.0915303 | 0.200759  | 5.073   | 0.547  | 4.448   | 5.468   | 6.140   | 0.385  | 5.753   | 6.523   |
| 5537 | ENSG00000259494 | MRPL46   | -1.1 | 0.0503875 | 0.1277666 | 4.399   | 0.212  | 4.155   | 4.540   | 5.127   | 0.081  | 5.034   | 5.179   |
| 5538 | ENSG00000136522 | MRPL47   | -1.1 | 0.0125181 | 0.0436353 | 109.335 | 2.638  | 106.573 | 111.829 | 123.022 | 4.132  | 120.385 | 127.784 |
| 5541 | ENSG00000149792 | MRPL49   | -1.1 | 0.007879  | 0.0302857 | 40.879  | 0.965  | 39.765  | 41.465  | 46.316  | 2.380  | 44.214  | 48.900  |
| 5545 | ENSG00000136897 | MRPL50   | -1.1 | 0.0106385 | 0.0383236 | 47.383  | 1.518  | 45.697  | 48.641  | 53.105  | 0.974  | 51.984  | 53.740  |
| 5549 | ENSG00000143436 | MRPL9    | -1.1 | 0.110075  | 0.2285694 | 73.712  | 3.743  | 69.422  | 76.316  | 79.906  | 1.737  | 78.102  | 81.566  |
| 5556 | ENSG00000048544 | MRPS10   | -1.1 | 0.0152816 | 0.05119   | 50.156  | 1.135  | 49.436  | 51.464  | 56.592  | 2.268  | 54.097  | 58.529  |
| 5561 | ENSG00000181991 | MRPS11   | 1.1  | 0.0861006 | 0.1918096 | 9.111   | 0.161  | 8.983   | 9.292   | 8.503   | 0.287  | 8.172   | 8.675   |
| 5567 | ENSG00000128626 | MRPS12   | -1.2 | 8.969E-05 | 0.0008275 | 27.375  | 1.864  | 25.225  | 28.528  | 34.192  | 0.303  | 33.899  | 34.504  |
| 5569 | ENSG00000122140 | MRPS2    | -1.2 | 0.0003695 | 0.0026159 | 53.700  | 1.712  | 52.165  | 55.547  | 64.445  | 1.483  | 63.283  | 66.116  |
| 5571 | ENSG00000062582 | MRPS24   | 1.4  | 0.1044985 | 0.2201523 | 1.794   | 0.672  | 1.244   | 2.543   | 1.360   | 0.458  | 0.832   | 1.661   |
| 5584 | ENSG00000147586 | MRPS28   | -1.1 | 0.0752292 | 0.1728502 | 14.877  | 1.032  | 13.823  | 15.886  | 17.226  | 0.973  | 16.165  | 18.076  |
| 5585 | ENSG00000112996 | MRPS30   | 1.1  | 0.0534286 | 0.1335643 | 33.874  | 1.102  | 32.622  | 34.696  | 32.398  | 1.482  | 30.866  | 33.824  |
| 5592 | ENSG00000102738 | MRPS31   | -1.1 | 0.0183763 | 0.0590422 | 41.803  | 2.341  | 39.856  | 44.401  | 47.626  | 4.060  | 43.739  | 51.840  |
| 5594 | ENSG00000074071 | MRPS34   | -1.1 | 0.0610326 | 0.1476112 | 199.595 | 15.955 | 185.853 | 217.093 | 219.621 | 11.605 | 211.005 | 232.816 |
| 5598 | ENSG00000144029 | MRPS5    | -1.1 | 0.0051805 | 0.0217019 | 21.462  | 0.710  | 20.732  | 22.150  | 24.292  | 0.553  | 23.946  | 24.930  |
| 5599 | ENSG00000135972 | MRPS9    | -1.1 | 0.0079025 | 0.0303622 | 105.070 | 1.989  | 103.159 | 107.129 | 118.305 | 6.363  | 111.235 | 123.575 |
| 5611 | ENSG00000124532 | MRS2     | 1.7  | 3.90E-20  | 2.54E-17  | 125.044 | 2.418  | 122.275 | 126.743 | 77.333  | 2.215  | 74.970  | 79.363  |
| 5618 | ENSG00000072952 | MRVI1    | 1.2  | 0.0020626 | 0.0103946 | 6.048   | 0.512  | 5.465   | 6.424   | 5.015   | 0.029  | 4.985   | 5.042   |
| 5620 | ENSG00000066697 | MSANTD3  | 1.1  | 0.0869452 | 0.1930661 | 22.084  | 0.194  | 21.936  | 22.304  | 20.890  | 0.629  | 20.241  | 21.496  |
| 5624 | ENSG00000170903 | MSANTD4  | -1.1 | 0.0072514 | 0.028285  | 17.286  | 1.005  | 16.322  | 18.328  | 20.276  | 1.990  | 18.283  | 22.262  |
| 5627 | ENSG00000235531 | MSC-AS1  | 1.6  | 0.0349106 | 0.0967938 | 0.448   | 0.083  | 0.379   | 0.541   | 0.287   | 0.012  | 0.274   | 0.297   |
| 5632 | ENSG00000095002 | MSH2     | -1.1 | 0.0001563 | 0.0013031 | 167.656 | 7.686  | 161.891 | 176.382 | 192.067 | 8.336  | 183.105 | 199.590 |
| 5637 | ENSG00000204410 | MSH5     | -1.2 | 0.0706196 | 0.1648868 | 2.575   | 0.262  | 2.299   | 2.820   | 3.093   | 0.276  | 2.840   | 3.387   |
| 5640 | ENSG00000135097 | MSI1     | -1.2 | 0.0063044 | 0.0253191 | 21.528  | 2.672  | 18.444  | 23.143  | 26.006  | 2.628  | 24.088  | 29.002  |
| 5643 | ENSG00000153944 | MSI2     | -1.2 | 1.773E-05 | 0.0002142 | 18.198  | 1.377  | 16.807  | 19.560  | 21.675  | 0.376  | 21.398  | 22.103  |
| 5645 | ENSG00000188895 | MSL1     | -1.2 | 1.213E-06 | 2.225E-05 | 39.906  | 1.274  | 38.782  | 41.290  | 48.563  | 2.164  | 46.770  | 50.966  |

|      | A               | B        | C    | D         | E         | F         | G        | H         | I         | J         | K       | L         | M         |
|------|-----------------|----------|------|-----------|-----------|-----------|----------|-----------|-----------|-----------|---------|-----------|-----------|
| 5646 | ENSG00000174579 | MSL2     | -1.1 | 0.000653  | 0.0041532 | 27.880    | 0.312    | 27.547    | 28.167    | 32.539    | 0.386   | 32.188    | 32.952    |
| 5659 | ENSG00000052802 | MSMO1    | 2    | 5.04E-24  | 8.53E-21  | 257.609   | 9.659    | 247.912   | 267.229   | 133.502   | 5.975   | 126.731   | 138.034   |
| 5664 | ENSG00000147065 | MSN      | -1   | 0.1193415 | 0.2418722 | 136.605   | 2.719    | 133.686   | 139.067   | 145.289   | 4.103   | 140.838   | 148.921   |
| 5665 | ENSG00000251593 | MSNP1    | -1.2 | 0.1031401 | 0.2179966 | 7.885     | 1.045    | 6.781     | 8.860     | 9.347     | 0.903   | 8.742     | 10.384    |
| 5672 | ENSG00000174099 | MSRB3    | -1.3 | 0.0748437 | 0.1722454 | 0.776     | 0.100    | 0.669     | 0.867     | 1.064     | 0.349   | 0.751     | 1.441     |
| 5678 | ENSG00000166343 | MSS51    | -1.3 | 0.0437114 | 0.11453   | 3.036     | 0.585    | 2.498     | 3.658     | 3.965     | 0.489   | 3.589     | 4.518     |
| 5681 | ENSG00000173531 | MST1     | -1.3 | 0.0118034 | 0.0416697 | 2.249     | 0.128    | 2.141     | 2.391     | 3.020     | 0.216   | 2.880     | 3.269     |
| 5683 | ENSG00000186715 | MST1L    | -1.1 | 0.086514  | 0.1924264 | 3.458     | 0.184    | 3.247     | 3.583     | 4.058     | 0.235   | 3.922     | 4.330     |
| 5689 | ENSG00000125459 | MSTO1    | 1.1  | 0.0698625 | 0.1635864 | 11.249    | 0.185    | 11.038    | 11.381    | 10.432    | 0.139   | 10.327    | 10.590    |
| 5693 | ENSG00000198899 | MT-ATP6  | 1.1  | 0.078408  | 0.1786494 | 16171.083 | 530.230  | 15815.936 | 16780.567 | 15349.943 | 258.103 | 15132.061 | 15634.989 |
| 5703 | ENSG00000228253 | MT-ATP8  | 1.1  | 0.117261  | 0.2389729 | 16226.056 | 477.907  | 15850.054 | 16763.860 | 15150.885 | 155.026 | 15017.158 | 15320.807 |
| 5710 | ENSG00000198804 | MT-CO1   | 1.2  | 2.351E-07 | 5.672E-06 | 21317.612 | 99.504   | 21231.018 | 21426.308 | 18836.398 | 198.766 | 18673.955 | 19058.037 |
| 5719 | ENSG00000198712 | MT-CO2   | 1.1  | 0.0031821 | 0.0147854 | 23732.064 | 450.278  | 23260.420 | 24157.397 | 22061.600 | 796.395 | 21155.917 | 22652.454 |
| 5720 | ENSG00000198727 | MT-CYB   | -1.1 | 0.0837186 | 0.187989  | 3993.415  | 214.917  | 3858.584  | 4241.260  | 4395.081  | 192.882 | 4244.194  | 4612.399  |
| 5724 | ENSG00000198888 | MT-ND1   | 1.3  | 6.02E-13  | 6.74E-11  | 3078.127  | 13.418   | 3065.122  | 3091.922  | 2364.964  | 73.422  | 2290.012  | 2436.753  |
| 5731 | ENSG00000198763 | MT-ND2   | 1.2  | 0.0003558 | 0.002536  | 6317.031  | 92.936   | 6241.455  | 6420.799  | 5348.396  | 174.222 | 5151.835  | 5483.770  |
| 5732 | ENSG00000198840 | MT-ND3   | 1.1  | 2.413E-05 | 0.000279  | 6248.630  | 95.209   | 6161.781  | 6350.430  | 5615.334  | 17.845  | 5598.270  | 5633.870  |
| 5734 | ENSG00000198886 | MT-ND4   | 1.1  | 0.0104548 | 0.037815  | 13424.521 | 76.786   | 13336.762 | 13479.346 | 12548.324 | 288.720 | 12266.460 | 12843.444 |
| 5746 | ENSG00000212907 | MT-ND4L  | 1.1  | 0.0057911 | 0.0237327 | 16382.602 | 170.804  | 16209.834 | 16551.372 | 15386.402 | 477.903 | 14972.280 | 15909.325 |
| 5751 | ENSG00000198786 | MT-ND5   | 1.1  | 0.0021478 | 0.0107217 | 3502.216  | 137.792  | 3350.158  | 3618.808  | 3227.658  | 21.613  | 3205.113  | 3248.199  |
| 5753 | ENSG00000198695 | MT-ND6   | 1.3  | 0.0558236 | 0.1381741 | 882.385   | 83.068   | 816.335   | 975.645   | 672.623   | 38.110  | 640.938   | 714.912   |
| 5762 | ENSG00000211459 | MT-RNR1  | 1.1  | 2.62E-05  | 0.0002981 | 2469.950  | 37.384   | 2446.086  | 2513.034  | 2229.400  | 73.386  | 2145.555  | 2281.951  |
| 5768 | ENSG00000210082 | MT-RNR2  | 1.1  | 1.218E-06 | 2.23E-05  | 20419.823 | 1042.928 | 19228.257 | 21166.690 | 18187.928 | 349.023 | 17825.831 | 18522.214 |
| 5780 | ENSG00000210194 | MT-TE    | 1.7  | 0.0756708 | 0.1736528 | 27.926    | 5.834    | 23.538    | 34.547    | 16.990    | 2.044   | 15.755    | 19.349    |
| 5785 | ENSG00000209082 | MT-TL1   | 1.3  | 0.0087478 | 0.0327038 | 269.937   | 11.121   | 258.052   | 280.092   | 214.111   | 46.946  | 160.211   | 246.068   |
| 5787 | ENSG00000210196 | MT-TP    | 1.9  | 0.0024682 | 0.0120408 | 66.030    | 16.103   | 50.392    | 82.560    | 35.905    | 2.767   | 34.257    | 39.100    |
| 5792 | ENSG00000210151 | MT-TS1   | -1.7 | 0.0047296 | 0.0202717 | 46.868    | 9.267    | 37.470    | 55.998    | 79.813    | 3.549   | 75.933    | 82.894    |
| 5806 | ENSG00000169715 | MT1E     | 2.4  | 0.0329832 | 0.0928504 | 34.497    | 24.587   | 14.540    | 61.963    | 15.019    | 1.994   | 13.040    | 17.027    |
| 5812 | ENSG00000198417 | MT1F     | 1.7  | 0.041785  | 0.1105269 | 4.383     | 2.508    | 1.735     | 6.722     | 2.640     | 0.171   | 2.474     | 2.815     |
| 5817 | ENSG00000125144 | MT1G     | 2.2  | 0.0251183 | 0.0752036 | 39.854    | 23.799   | 21.652    | 66.785    | 18.291    | 3.574   | 14.909    | 22.029    |
| 5818 | ENSG00000205358 | MT1H     | 2.2  | 0.1144081 | 0.2345765 | 17.648    | 15.646   | 4.946     | 35.124    | 8.232     | 1.687   | 6.551     | 9.926     |
| 5821 | ENSG00000187193 | MT1X     | -1.3 | 0.0224912 | 0.069062  | 7.556     | 1.486    | 5.966     | 8.910     | 10.059    | 1.213   | 8.672     | 10.919    |
| 5822 | ENSG00000125148 | MT2A     | 2.5  | 0.0313139 | 0.0892053 | 37.894    | 28.293   | 16.114    | 69.873    | 15.493    | 3.890   | 11.118    | 18.564    |
| 5826 | ENSG00000182979 | MTA1     | -1.2 | 0.0003818 | 0.0026917 | 39.543    | 0.617    | 38.914    | 40.148    | 47.021    | 4.715   | 43.339    | 52.335    |
| 5831 | ENSG00000099810 | MTAP     | 1.2  | 0.0001701 | 0.0013982 | 19.339    | 1.422    | 17.889    | 20.732    | 17.126    | 0.477   | 16.624    | 17.573    |
| 5838 | ENSG00000240409 | MTATP8P1 | 1.5  | 0.0444274 | 0.1159033 | 17.894    | 4.672    | 13.373    | 22.703    | 12.377    | 0.684   | 11.960    | 13.166    |
| 5848 | ENSG00000168502 | MTCL1    | -1.1 | 0.0019033 | 0.0097874 | 10.065    | 0.381    | 9.811     | 10.504    | 11.675    | 0.755   | 11.011    | 12.497    |
| 5856 | ENSG00000237973 | MTCO1P12 | 1.1  | 1.266E-06 | 2.31E-05  | 2544.258  | 19.169   | 2527.244  | 2565.027  | 2268.701  | 21.189  | 2249.293  | 2291.307  |
| 5870 | ENSG00000122085 | MTERF4   | -1.1 | 0.0052513 | 0.0219082 | 9.069     | 0.382    | 8.666     | 9.425     | 10.566    | 0.702   | 9.824     | 11.220    |
| 5903 | ENSG00000103707 | MTFMT    | 1.2  | 0.0019223 | 0.0098604 | 15.467    | 0.618    | 14.799    | 16.018    | 13.296    | 0.716   | 12.534    | 13.956    |

|      | A               | B             | C    | D         | E         | F        | G      | H        | I        | J        | K      | L        | M        |
|------|-----------------|---------------|------|-----------|-----------|----------|--------|----------|----------|----------|--------|----------|----------|
| 5907 | ENSG00000066855 | MTRF1         | -1.1 | 0.0224305 | 0.0689133 | 23.541   | 0.313  | 23.267   | 23.881   | 26.422   | 1.085  | 25.497   | 27.616   |
| 5908 | ENSG00000146410 | MTRF2         | -1.1 | 0.1213348 | 0.2449142 | 9.392    | 0.768  | 8.557    | 10.070   | 10.766   | 0.493  | 10.341   | 11.307   |
| 5910 | ENSG00000120254 | MTHFD1L       | 1.1  | 0.0067134 | 0.0266097 | 53.038   | 1.732  | 51.838   | 55.024   | 49.463   | 3.169  | 45.993   | 52.206   |
| 5933 | ENSG00000065911 | MTHFD2        | 1.3  | 2.02E-12  | 2.081E-10 | 148.591  | 4.679  | 143.522  | 152.745  | 114.263  | 3.707  | 110.145  | 117.335  |
| 5936 | ENSG00000181260 | MTHFD2P7      | 1.4  | 0.0161459 | 0.0535346 | 5.802    | 0.228  | 5.636    | 6.062    | 4.160    | 0.580  | 3.580    | 4.740    |
| 5939 | ENSG00000136371 | MTHFS         | 1.4  | 0.0126093 | 0.043908  | 5.685    | 0.383  | 5.244    | 5.930    | 4.299    | 0.268  | 3.994    | 4.497    |
| 5940 | ENSG00000085760 | MTIF2         | -1.1 | 0.1244881 | 0.2496404 | 51.939   | 1.690  | 50.935   | 53.890   | 55.867   | 1.761  | 54.751   | 57.896   |
| 5942 | ENSG00000171100 | MTM1          | -1.2 | 0.0051813 | 0.0217019 | 10.178   | 0.461  | 9.683    | 10.595   | 12.403   | 0.851  | 11.833   | 13.381   |
| 5955 | ENSG00000063601 | MTMR1         | 1.2  | 0.0009642 | 0.0056897 | 11.798   | 0.369  | 11.535   | 12.220   | 10.326   | 0.052  | 10.267   | 10.364   |
| 5956 | ENSG00000166912 | MTMR10        | 1.1  | 0.0646014 | 0.1541093 | 12.506   | 0.385  | 12.107   | 12.876   | 11.842   | 0.622  | 11.246   | 12.488   |
| 5963 | ENSG00000150712 | MTMR12        | 1.1  | 0.0193822 | 0.061457  | 34.965   | 1.748  | 32.964   | 36.196   | 32.807   | 1.535  | 31.703   | 34.561   |
| 5968 | ENSG00000100330 | MTMR3         | -1.2 | 0.0003826 | 0.0026965 | 13.213   | 0.171  | 13.016   | 13.329   | 15.620   | 1.005  | 14.851   | 16.756   |
| 5973 | ENSG00000108389 | MTMR4         | -1.1 | 0.0367161 | 0.1003684 | 17.629   | 0.275  | 17.314   | 17.816   | 19.428   | 0.611  | 18.761   | 19.959   |
| 5976 | ENSG00000139505 | MTMR6         | 1.1  | 0.0052439 | 0.0218934 | 14.217   | 0.379  | 13.831   | 14.588   | 12.646   | 1.137  | 11.421   | 13.667   |
| 5978 | ENSG00000104643 | MTMR9         | 1.2  | 4.034E-05 | 0.0004294 | 19.887   | 0.344  | 19.579   | 20.258   | 17.420   | 0.517  | 17.036   | 18.008   |
| 5984 | ENSG00000225972 | MTND1P23      | 1.2  | 0.0006008 | 0.0038845 | 148.928  | 3.660  | 144.980  | 152.209  | 124.782  | 4.638  | 119.481  | 128.092  |
| 5993 | ENSG00000225630 | MTND2P28      | 1.2  | 5.937E-05 | 0.0005899 | 1355.161 | 46.501 | 1316.011 | 1406.561 | 1149.167 | 27.635 | 1117.289 | 1166.357 |
| 6001 | ENSG00000247627 | MTND4P12      | 1.2  | 0.0659968 | 0.1566603 | 22.192   | 3.405  | 19.349   | 25.966   | 19.627   | 3.151  | 16.526   | 22.825   |
| 6010 | ENSG00000198793 | MTOR          | 1    | 0.1032589 | 0.2182204 | 37.796   | 0.331  | 37.548   | 38.171   | 36.898   | 1.632  | 35.597   | 38.729   |
| 6022 | ENSG00000120662 | MTRF1         | -1.2 | 0.0017608 | 0.0092141 | 9.860    | 0.262  | 9.693    | 10.162   | 12.506   | 1.278  | 11.321   | 13.860   |
| 6057 | ENSG00000269028 | MTRNR2L1<br>2 | 1.1  | 0.1118982 | 0.2312327 | 18.357   | 1.525  | 16.599   | 19.320   | 16.439   | 1.293  | 15.071   | 17.640   |
| 6085 | ENSG00000132613 | MTSS1L        | -1.2 | 1.181E-05 | 0.0001535 | 17.885   | 0.765  | 17.196   | 18.708   | 22.797   | 2.058  | 20.566   | 24.622   |
| 6119 | ENSG00000129422 | MTUS1         | 1.3  | 0.0028292 | 0.013436  | 2.507    | 0.220  | 2.270    | 2.705    | 2.048    | 0.176  | 1.940    | 2.251    |
| 6125 | ENSG00000132938 | MTUS2         | 1.3  | 0.1134032 | 0.2332184 | 0.503    | 0.104  | 0.385    | 0.582    | 0.390    | 0.046  | 0.352    | 0.441    |
| 6148 | ENSG00000177034 | MTX3          | -1.1 | 0.0057618 | 0.0236468 | 36.095   | 0.489  | 35.535   | 36.437   | 40.830   | 3.699  | 37.295   | 44.673   |
| 6170 | ENSG00000181143 | MUC16         | 1.5  | 0.0014439 | 0.0078395 | 0.243    | 0.040  | 0.201    | 0.280    | 0.166    | 0.013  | 0.152    | 0.178    |
| 6265 | ENSG00000169894 | MUC3A         | -1.1 | 0.0966422 | 0.208145  | 3.828    | 0.284  | 3.585    | 4.141    | 4.326    | 0.406  | 3.919    | 4.730    |
| 6349 | ENSG00000145113 | MUC4          | -1.3 | 0.0346795 | 0.0962952 | 0.383    | 0.070  | 0.312    | 0.451    | 0.518    | 0.136  | 0.438    | 0.675    |
| 6365 | ENSG00000160953 | MUM1          | -1.4 | 1.133E-09 | 5.431E-08 | 10.328   | 0.108  | 10.243   | 10.450   | 14.327   | 0.543  | 13.712   | 14.744   |
| 6376 | ENSG00000172732 | MUS81         | -1.1 | 0.0248223 | 0.0745948 | 8.258    | 0.413  | 7.863    | 8.687    | 9.595    | 0.894  | 9.018    | 10.625   |
| 6467 | ENSG00000146085 | MUT           | 1.1  | 0.0993677 | 0.2124073 | 27.042   | 1.627  | 25.284   | 28.494   | 25.787   | 0.060  | 25.730   | 25.849   |
| 6532 | ENSG00000132781 | MUTYH         | -1.1 | 0.0991851 | 0.2121023 | 24.251   | 0.295  | 23.962   | 24.551   | 26.561   | 1.798  | 24.548   | 28.009   |
| 6591 | ENSG00000141971 | MVB12A        | -1.2 | 0.0018609 | 0.0095983 | 11.537   | 0.407  | 11.074   | 11.836   | 14.238   | 0.672  | 13.794   | 15.011   |



|      | A               | B       | C    | D         | E         | F       | G      | H       | I       | J       | K     | L       | M       |
|------|-----------------|---------|------|-----------|-----------|---------|--------|---------|---------|---------|-------|---------|---------|
| 6593 | ENSG00000196814 | MVB12B  | 1.3  | 0.00144   | 0.0078211 | 4.290   | 0.020  | 4.271   | 4.310   | 3.469   | 0.285 | 3.152   | 3.704   |
| 6682 | ENSG00000167508 | MVD     | 1.3  | 2.085E-09 | 9.452E-08 | 27.636  | 0.712  | 27.200  | 28.458  | 21.136  | 1.226 | 20.017  | 22.447  |
| 6800 | ENSG00000110921 | MVK     | 1.4  | 1.393E-05 | 0.0001762 | 5.769   | 0.306  | 5.537   | 6.116   | 4.100   | 0.714 | 3.667   | 4.924   |
| 6877 | ENSG0000013364  | MVP     | -1.2 | 0.0049499 | 0.0209817 | 6.336   | 0.580  | 5.698   | 6.832   | 7.851   | 0.946 | 7.229   | 8.939   |
| 6891 | ENSG00000157601 | MX1     | 1.2  | 0.0082888 | 0.0314181 | 2.488   | 0.067  | 2.420   | 2.553   | 2.042   | 0.102 | 1.924   | 2.109   |
| 6933 | ENSG00000059728 | MXD1    | 1.6  | 1.951E-05 | 0.0002329 | 2.861   | 0.571  | 2.278   | 3.420   | 1.790   | 0.228 | 1.551   | 2.005   |
| 6983 | ENSG00000213347 | MXD3    | -1.3 | 0.002042  | 0.0103215 | 3.650   | 0.356  | 3.239   | 3.859   | 4.942   | 0.439 | 4.476   | 5.348   |
| 7002 | ENSG00000123933 | MXD4    | -1.2 | 0.0006342 | 0.0040556 | 7.735   | 0.677  | 7.114   | 8.457   | 9.604   | 0.676 | 8.955   | 10.304  |
| 7026 | ENSG00000119950 | MXI1    | 1.2  | 0.002789  | 0.0133059 | 13.319  | 0.701  | 12.547  | 13.918  | 11.578  | 0.776 | 10.686  | 12.099  |
| 7041 | ENSG00000182534 | MXRA7   | 1.2  | 0.0021868 | 0.010865  | 8.691   | 0.136  | 8.586   | 8.844   | 7.689   | 0.354 | 7.316   | 8.019   |
| 7213 | ENSG00000179820 | MYADM   | 1.4  | 2.72E-10  | 1.587E-08 | 74.806  | 6.630  | 67.173  | 79.134  | 55.984  | 0.665 | 55.220  | 56.429  |
| 7260 | ENSG00000118513 | MYB     | -1.5 | 0.0001018 | 0.0009171 | 2.463   | 0.473  | 2.016   | 2.959   | 3.786   | 0.216 | 3.585   | 4.015   |
| 7275 | ENSG00000132382 | MYBBP1A | -1.1 | 0.0020158 | 0.0102172 | 34.513  | 0.724  | 33.870  | 35.297  | 39.318  | 1.862 | 37.504  | 41.224  |
| 7282 | ENSG00000086967 | MYBPC2  | 1.2  | 0.0799044 | 0.1810831 | 4.049   | 0.618  | 3.345   | 4.500   | 3.466   | 0.378 | 3.141   | 3.880   |
| 7306 | ENSG00000136997 | MYC     | 1.3  | 1.63E-07  | 4.179E-06 | 44.472  | 3.145  | 41.228  | 47.507  | 34.585  | 2.662 | 32.833  | 37.648  |
| 7335 | ENSG00000214114 | MYCBP   | -1.2 | 0.0005349 | 0.0035352 | 13.468  | 1.104  | 12.437  | 14.633  | 17.079  | 0.522 | 16.557  | 17.601  |
| 7363 | ENSG00000005810 | MYCBP2  | -1.2 | 3.557E-07 | 8.074E-06 | 14.867  | 0.754  | 14.240  | 15.704  | 18.743  | 1.168 | 17.395  | 19.451  |
| 7371 | ENSG00000116990 | MYCL    | -1.1 | 0.0221709 | 0.0682397 | 17.466  | 0.143  | 17.351  | 17.626  | 19.702  | 1.036 | 18.657  | 20.728  |
| 7407 | ENSG00000134323 | MYCN    | 1.1  | 0.0004415 | 0.0030182 | 81.278  | 3.852  | 76.830  | 83.522  | 72.868  | 2.793 | 70.231  | 75.795  |
| 7690 | ENSG00000172936 | MYD88   | 1.1  | 0.1004899 | 0.2138749 | 18.010  | 1.222  | 16.630  | 18.951  | 17.022  | 0.693 | 16.312  | 17.697  |
| 7770 | ENSG00000074842 | MYDGF   | -1.1 | 0.0337634 | 0.0944026 | 43.543  | 1.638  | 41.819  | 45.079  | 49.567  | 4.611 | 44.702  | 53.873  |
| 7818 | ENSG00000104177 | MYEF2   | 1.1  | 0.0241159 | 0.0729123 | 39.115  | 0.795  | 38.202  | 39.653  | 37.153  | 2.320 | 34.755  | 39.388  |
| 8279 | ENSG00000133026 | MYH10   | 1.1  | 0.0493068 | 0.125729  | 188.974 | 13.858 | 173.041 | 198.221 | 182.751 | 5.142 | 178.036 | 188.234 |
| 8288 | ENSG00000100345 | MYH9    | 1.3  | 5.289E-10 | 2.769E-08 | 231.053 | 12.394 | 216.844 | 239.642 | 184.832 | 8.078 | 179.479 | 194.124 |
| 8310 | ENSG00000101608 | MYL12A  | 1.1  | 6.122E-05 | 0.0006052 | 163.246 | 5.448  | 157.119 | 167.543 | 148.158 | 4.410 | 144.268 | 152.950 |
| 8329 | ENSG00000118680 | MYL12B  | 1.1  | 2.673E-05 | 0.0003028 | 273.288 | 9.230  | 264.045 | 282.504 | 244.751 | 8.927 | 237.189 | 254.599 |
| 8394 | ENSG00000092841 | MYL6    | 1.1  | 0.0012505 | 0.0070289 | 207.726 | 3.781  | 204.124 | 211.663 | 195.029 | 3.956 | 192.324 | 199.569 |
| 8400 | ENSG00000106631 | MYL7    | 2.3  | 4.646E-05 | 0.0004833 | 4.336   | 0.862  | 3.342   | 4.864   | 1.924   | 0.325 | 1.602   | 2.253   |
| 8465 | ENSG00000101335 | MYL9    | 1.6  | 1.93E-14  | 3.27E-12  | 114.375 | 8.042  | 107.031 | 122.968 | 72.820  | 2.477 | 70.355  | 75.309  |
| 8499 | ENSG00000007944 | MYLIP   | -1.1 | 0.0082424 | 0.0312904 | 35.457  | 0.989  | 34.319  | 36.104  | 40.787  | 2.246 | 39.287  | 43.369  |
| 8507 | ENSG00000065534 | MYLK    | 1.1  | 0.0635032 | 0.1522189 | 3.672   | 0.322  | 3.317   | 3.945   | 3.417   | 0.297 | 3.200   | 3.755   |
| 8666 | ENSG00000180209 | MYLPF   | -1.6 | 0.0112745 | 0.0401365 | 2.781   | 0.710  | 1.979   | 3.329   | 4.423   | 0.376 | 4.025   | 4.772   |
| 8706 | ENSG00000085274 | MYNN    | -1.1 | 0.1123367 | 0.2317861 | 13.511  | 0.128  | 13.416  | 13.656  | 14.807  | 0.666 | 14.039  | 15.232  |
| 8713 | ENSG00000145555 | MYO10   | -1.2 | 2.581E-05 | 0.0002941 | 43.373  | 2.639  | 40.557  | 45.788  | 51.018  | 1.931 | 48.788  | 52.141  |
| 8772 | ENSG00000266714 | MYO15B  | -1.2 | 0.012726  | 0.0442142 | 2.334   | 0.289  | 2.084   | 2.650   | 2.846   | 0.107 | 2.759   | 2.966   |
| 9022 | ENSG00000041515 | MYO16   | 1.5  | 0.0599296 | 0.1455044 | 0.375   | 0.093  | 0.305   | 0.481   | 0.251   | 0.097 | 0.186   | 0.362   |
| 9042 | ENSG00000133454 | MYO18B  | 1.6  | 0.0037525 | 0.0168525 | 0.722   | 0.127  | 0.599   | 0.852   | 0.458   | 0.102 | 0.395   | 0.576   |
| 9054 | ENSG00000197879 | MYO1C   | 1.2  | 6.511E-08 | 1.866E-06 | 39.929  | 1.937  | 37.708  | 41.267  | 32.818  | 2.168 | 31.300  | 35.301  |
| 9136 | ENSG00000157483 | MYO1E   | -1.2 | 4.694E-05 | 0.0004864 | 21.852  | 1.648  | 20.105  | 23.379  | 26.245  | 1.000 | 25.273  | 27.270  |
| 9179 | ENSG00000095777 | MYO3A   | -1.4 | 0.0001743 | 0.0014279 | 1.780   | 0.334  | 1.587   | 2.165   | 2.635   | 0.031 | 2.617   | 2.670   |
| 9208 | ENSG00000197535 | MYO5A   | 1.1  | 0.0216793 | 0.0671543 | 17.274  | 0.211  | 17.063  | 17.484  | 16.336  | 0.606 | 15.638  | 16.728  |
| 9239 | ENSG00000128833 | MYO5C   | 1.2  | 8.316E-05 | 0.0007771 | 11.491  | 0.375  | 11.198  | 11.913  | 9.874   | 0.258 | 9.684   | 10.168  |
| 9257 | ENSG00000196586 | MYO6    | 1.1  | 0.0003901 | 0.0027413 | 37.875  | 1.838  | 36.241  | 39.865  | 34.345  | 1.613 | 33.111  | 36.170  |

|       | A               | B       | C    | D         | E         | F       | G     | H       | I       | J       | K     | L       | M       |
|-------|-----------------|---------|------|-----------|-----------|---------|-------|---------|---------|---------|-------|---------|---------|
| 9263  | ENSG00000137474 | MYO7A   | -1.4 | 0.012041  | 0.0423818 | 0.419   | 0.006 | 0.411   | 0.422   | 0.613   | 0.042 | 0.566   | 0.647   |
| 9324  | ENSG00000066933 | MYO9A   | -1.1 | 0.1182788 | 0.2403451 | 7.522   | 0.330 | 7.246   | 7.888   | 8.161   | 0.544 | 7.576   | 8.652   |
| 9327  | ENSG00000099331 | MYO9B   | -1.1 | 0.0335417 | 0.0939222 | 18.488  | 0.343 | 18.148  | 18.834  | 20.469  | 1.655 | 18.562  | 21.523  |
| 9387  | ENSG00000141052 | MYOCD   | 1.7  | 0.0028321 | 0.0134434 | 0.634   | 0.058 | 0.588   | 0.699   | 0.383   | 0.029 | 0.350   | 0.405   |
| 9411  | ENSG00000138119 | MYOF    | 2    | 0.0020446 | 0.0103226 | 5.403   | 1.803 | 3.956   | 7.423   | 2.773   | 0.328 | 2.566   | 3.151   |
| 9488  | ENSG00000101605 | MYOM1   | 1.3  | 0.0561915 | 0.13876   | 1.186   | 0.096 | 1.088   | 1.280   | 0.952   | 0.075 | 0.904   | 1.039   |
| 9503  | ENSG00000176182 | MYPOP   | -1.3 | 0.0266842 | 0.07875   | 3.527   | 0.095 | 3.437   | 3.626   | 4.773   | 0.677 | 4.273   | 5.544   |
| 9594  | ENSG00000170011 | MYRIP   | 1.6  | 0.0001012 | 0.0009133 | 2.840   | 0.572 | 2.233   | 3.369   | 1.851   | 0.245 | 1.613   | 2.103   |
| 9603  | ENSG00000196132 | MYT1    | -1.7 | 8.337E-05 | 0.0007782 | 0.812   | 0.143 | 0.660   | 0.943   | 1.449   | 0.064 | 1.412   | 1.523   |
| 9630  | ENSG00000204899 | MZT1    | -1.1 | 0.0574837 | 0.1410891 | 68.894  | 5.310 | 63.620  | 74.240  | 78.361  | 4.812 | 75.444  | 83.915  |
| 9743  | ENSG00000078177 | N4BP2   | 1.1  | 0.0483801 | 0.1238276 | 27.067  | 0.638 | 26.343  | 27.547  | 25.950  | 0.113 | 25.881  | 26.081  |
| 9759  | ENSG00000139597 | N4BP2L1 | 1.4  | 9.293E-05 | 0.0008519 | 4.520   | 0.229 | 4.293   | 4.750   | 3.341   | 0.311 | 3.002   | 3.612   |
| 9787  | ENSG00000244754 | N4BP2L2 | 1.1  | 0.0004078 | 0.0028335 | 16.507  | 0.324 | 16.140  | 16.751  | 14.887  | 0.470 | 14.614  | 15.429  |
| 9817  | ENSG00000156239 | N6AMT1  | 1.1  | 0.0417805 | 0.1105269 | 15.893  | 0.479 | 15.387  | 16.338  | 14.685  | 0.465 | 14.167  | 15.067  |
| 9975  | ENSG00000102030 | NAA10   | -1.2 | 0.0162024 | 0.0536629 | 9.569   | 0.224 | 9.316   | 9.740   | 11.263  | 0.400 | 11.016  | 11.724  |
| 10003 | ENSG00000164134 | NAA15   | -1.1 | 0.0794023 | 0.1802592 | 55.092  | 3.347 | 51.390  | 57.906  | 59.998  | 3.713 | 55.711  | 62.170  |
| 10070 | ENSG00000172766 | NAA16   | 1.1  | 0.0650195 | 0.1547967 | 18.860  | 0.697 | 18.055  | 19.274  | 17.840  | 1.182 | 17.061  | 19.200  |
| 10123 | ENSG00000139977 | NAA30   | -1.1 | 0.0531875 | 0.1331498 | 17.556  | 0.847 | 16.583  | 18.124  | 19.325  | 0.875 | 18.345  | 20.028  |
| 10175 | ENSG00000135040 | NAA35   | -1.1 | 0.0088689 | 0.0330685 | 34.478  | 2.504 | 32.326  | 37.225  | 39.324  | 2.465 | 37.321  | 42.077  |
| 10261 | ENSG00000121579 | NAA50   | 1.1  | 0.0030562 | 0.0143107 | 104.735 | 1.496 | 103.567 | 106.421 | 98.628  | 1.444 | 97.178  | 100.066 |
| 10427 | ENSG00000122390 | NAA60   | 1.1  | 0.0551922 | 0.1370325 | 15.092  | 0.932 | 14.029  | 15.772  | 14.101  | 0.408 | 13.673  | 14.486  |
| 10432 | ENSG00000077616 | NAALAD2 | 1.2  | 0.0624767 | 0.1502658 | 3.131   | 0.378 | 2.748   | 3.503   | 2.719   | 0.299 | 2.508   | 3.061   |
| 10616 | ENSG00000138386 | NAB1    | 1.5  | 4.22E-11  | 3.022E-09 | 49.177  | 2.796 | 46.375  | 51.967  | 33.630  | 2.463 | 32.096  | 36.471  |
| 10621 | ENSG00000166886 | NAB2    | 1.3  | 6.155E-06 | 8.816E-05 | 73.813  | 7.355 | 65.336  | 78.502  | 59.131  | 3.405 | 55.258  | 61.654  |
| 10622 | ENSG00000139579 | NABP2   | -1.3 | 1.767E-05 | 0.0002137 | 28.428  | 2.040 | 26.111  | 29.955  | 36.502  | 1.891 | 34.340  | 37.847  |
| 10624 | ENSG00000196531 | NACA    | -1.1 | 0.0002279 | 0.0017726 | 185.497 | 3.572 | 182.910 | 189.572 | 208.358 | 5.800 | 202.182 | 213.689 |
| 10626 | ENSG00000253506 | NACA2   | -1.1 | 0.0831664 | 0.1870221 | 55.626  | 2.829 | 53.428  | 58.817  | 62.641  | 3.345 | 58.928  | 65.418  |
| 10627 | ENSG00000136274 | NACAD   | -1.2 | 0.0384077 | 0.1036029 | 2.662   | 0.223 | 2.432   | 2.878   | 3.311   | 0.222 | 3.055   | 3.443   |
| 10628 | ENSG00000008130 | NADK    | -1.1 | 0.0016179 | 0.0086133 | 31.379  | 0.759 | 30.635  | 32.153  | 36.045  | 1.731 | 34.786  | 38.019  |
| 10629 | ENSG00000152620 | NADK2   | 1.2  | 3.628E-05 | 0.0003908 | 17.082  | 0.267 | 16.774  | 17.262  | 14.073  | 0.555 | 13.631  | 14.695  |
| 10632 | ENSG00000172890 | NADSYN1 | 1.2  | 1.69E-05  | 0.0002058 | 7.547   | 0.202 | 7.320   | 7.708   | 6.292   | 0.428 | 5.890   | 6.741   |
| 10633 | ENSG00000159593 | NAE1    | 1    | 0.0840009 | 0.1884227 | 99.528  | 0.458 | 99.026  | 99.922  | 97.120  | 1.904 | 95.899  | 99.314  |
| 10636 | ENSG00000198951 | NAGA    | 1.1  | 0.0079488 | 0.0304571 | 27.806  | 1.242 | 26.374  | 28.583  | 25.260  | 0.849 | 24.308  | 25.939  |
| 10637 | ENSG00000108784 | NAGLU   | 1.1  | 0.0497404 | 0.1264786 | 18.158  | 1.079 | 17.061  | 19.217  | 16.615  | 0.390 | 16.333  | 17.060  |
| 10642 | ENSG00000103174 | NAGPA   | 1.2  | 0.1153381 | 0.2359354 | 2.756   | 0.288 | 2.505   | 3.070   | 2.384   | 0.399 | 2.008   | 2.804   |
| 10643 | ENSG00000171169 | NAIF1   | -1.2 | 0.0635588 | 0.1522189 | 6.068   | 0.166 | 5.912   | 6.243   | 7.218   | 1.449 | 6.038   | 8.835   |
| 10644 | ENSG00000237886 | NALT1   | -1.3 | 0.0105526 | 0.0380789 | 15.518  | 1.024 | 14.801  | 16.691  | 20.444  | 3.128 | 17.486  | 23.719  |
| 10645 | ENSG00000105835 | NAMPT   | 1.1  | 0.0427116 | 0.1123815 | 35.363  | 1.702 | 34.302  | 37.326  | 33.778  | 1.584 | 32.762  | 35.603  |
| 10646 | ENSG00000176654 | NANOGP1 | -1.2 | 0.0840399 | 0.1884603 | 4.247   | 0.341 | 3.900   | 4.581   | 5.210   | 0.043 | 5.165   | 5.250   |
| 10647 | ENSG00000170191 | NANP    | 1.2  | 0.0027499 | 0.0131641 | 8.743   | 0.442 | 8.386   | 9.237   | 7.296   | 0.245 | 7.130   | 7.578   |
| 10649 | ENSG00000186462 | NAP1L2  | 1.1  | 0.0697425 | 0.1634121 | 34.936  | 2.083 | 32.945  | 37.100  | 32.889  | 0.846 | 32.016  | 33.705  |
| 10650 | ENSG00000186310 | NAP1L3  | 1.1  | 0.0094498 | 0.0347821 | 138.460 | 4.561 | 135.199 | 143.672 | 129.474 | 7.197 | 122.737 | 137.057 |

|       | A                | B        | C    | D         | E         | F       | G     | H       | I       | J       | K     | L       | M       |
|-------|------------------|----------|------|-----------|-----------|---------|-------|---------|---------|---------|-------|---------|---------|
| 10651 | ENSG00000205531  | NAP1L4   | -1   | 0.0956307 | 0.2068553 | 90.516  | 0.606 | 89.836  | 91.002  | 96.589  | 1.229 | 95.494  | 97.918  |
| 10652 | ENSG00000177432  | NAP1L5   | 1.5  | 0.0010478 | 0.0061019 | 4.980   | 0.858 | 4.071   | 5.777   | 3.482   | 0.126 | 3.346   | 3.595   |
| 10653 | ENSG00000204118  | NAP1L6   | -1.2 | 0.0380105 | 0.102877  | 7.630   | 0.951 | 6.560   | 8.379   | 9.521   | 1.389 | 8.282   | 11.022  |
| 10655 | ENSG00000105402  | NAPA     | 1.1  | 0.0106982 | 0.0384813 | 13.716  | 0.520 | 13.149  | 14.169  | 12.388  | 0.481 | 11.861  | 12.803  |
| 10658 | ENSG00000125814  | NAPB     | -1.1 | 0.070925  | 0.1653646 | 9.028   | 0.612 | 8.327   | 9.450   | 10.253  | 0.503 | 9.853   | 10.817  |
| 10659 | ENSG00000147813  | NAPRT    | -1.2 | 0.0004143 | 0.0028694 | 16.054  | 0.597 | 15.690  | 16.742  | 20.350  | 0.968 | 19.267  | 21.131  |
| 10660 | ENSG00000141562  | NARF     | -1.4 | 2.503E-10 | 1.47E-08  | 15.621  | 0.741 | 14.789  | 16.207  | 22.112  | 1.515 | 20.814  | 23.777  |
| 10661 | ENSG00000103245  | NARFL    | -1.2 | 0.0043456 | 0.0189672 | 5.083   | 0.392 | 4.650   | 5.413   | 6.208   | 0.194 | 6.020   | 6.407   |
| 10662 | ENSG00000134440  | NARS     | 1.1  | 0.0028979 | 0.0136715 | 236.859 | 8.120 | 229.326 | 245.461 | 223.467 | 7.925 | 215.649 | 231.495 |
| 10663 | ENSG00000090971  | NAT14    | -1.1 | 0.0187861 | 0.0599942 | 32.871  | 0.607 | 32.171  | 33.242  | 37.800  | 4.617 | 34.032  | 42.950  |
| 10665 | ENSG00000167011  | NAT16    | 1.6  | 0.0082229 | 0.0312527 | 1.570   | 0.276 | 1.373   | 1.886   | 1.030   | 0.094 | 0.923   | 1.091   |
| 10666 | ENSG00000243477  | NAT6     | -1.2 | 0.063961  | 0.152973  | 7.223   | 0.665 | 6.685   | 7.967   | 8.621   | 0.218 | 8.375   | 8.792   |
| 10668 | ENSG00000109065  | NAT9     | -1.2 | 9.397E-05 | 0.0008596 | 24.437  | 0.704 | 23.775  | 25.177  | 29.907  | 0.341 | 29.572  | 30.253  |
| 10669 | ENSG00000134369  | NAV1     | -1.1 | 0.062705  | 0.1507505 | 7.992   | 0.584 | 7.325   | 8.416   | 8.810   | 0.831 | 8.252   | 9.766   |
| 10671 | ENSG00000166833  | NAV2     | 1.1  | 0.0105445 | 0.0380579 | 28.503  | 1.826 | 26.746  | 30.392  | 26.888  | 0.996 | 25.739  | 27.499  |
| 10673 | ENSG00000151779  | NBAS     | -1.2 | 8.731E-06 | 0.0001187 | 24.183  | 0.663 | 23.792  | 24.948  | 28.857  | 0.464 | 28.411  | 29.338  |
| 10675 | ENSG00000260455  | NBAT1    | -1.4 | 0.04163   | 0.1102045 | 1.781   | 0.443 | 1.447   | 2.283   | 2.622   | 0.815 | 1.935   | 3.522   |
| 10676 | ENSG00000172915  | NBEA     | -1.2 | 6.978E-07 | 1.42E-05  | 27.007  | 1.038 | 26.290  | 28.197  | 33.117  | 1.356 | 31.582  | 34.155  |
| 10678 | ENSG00000160796  | NBEAL2   | -1.3 | 6.532E-07 | 1.344E-05 | 12.367  | 0.733 | 11.706  | 13.155  | 16.341  | 1.610 | 15.041  | 18.142  |
| 10679 | ENSG00000104320  | NBN      | 1.1  | 0.0322053 | 0.0911669 | 26.653  | 0.281 | 26.375  | 26.936  | 25.063  | 1.590 | 23.562  | 26.730  |
| 10680 | ENSG00000263956  | NBPF11   | -1.1 | 0.0511849 | 0.1293234 | 11.090  | 0.740 | 10.261  | 11.684  | 12.581  | 0.855 | 11.594  | 13.123  |
| 10681 | ENSG00000268043  | NBPF12   | -1.1 | 0.008743  | 0.0327004 | 10.093  | 0.287 | 9.766   | 10.301  | 11.772  | 0.747 | 11.135  | 12.594  |
| 10683 | ENSG00000270629  | NBPF14   | 1.2  | 0.0345556 | 0.0960142 | 2.467   | 0.180 | 2.260   | 2.591   | 2.167   | 0.114 | 2.065   | 2.291   |
| 10685 | ENSG00000266338  | NBPF15   | 1.4  | 3.152E-06 | 4.985E-05 | 9.984   | 0.512 | 9.556   | 10.551  | 7.402   | 0.776 | 6.515   | 7.951   |
| 10686 | ENSG00000272150  | NBPF25P  | 1.2  | 0.0929124 | 0.2025169 | 3.074   | 0.287 | 2.746   | 3.277   | 2.638   | 0.285 | 2.320   | 2.867   |
| 10687 | ENSG00000227001  | NBPF2P   | 1.4  | 0.0195074 | 0.0617729 | 8.592   | 0.544 | 8.041   | 9.128   | 6.151   | 0.965 | 5.169   | 7.098   |
| 10690 | ENSG00000142794  | NBPF3    | 1.1  | 0.0481391 | 0.1232853 | 9.213   | 0.290 | 8.911   | 9.489   | 8.530   | 0.178 | 8.338   | 8.690   |
| 10692 | ENSG00000269713  | NBPF9    | 1.2  | 0.010068  | 0.0366507 | 3.062   | 0.278 | 2.876   | 3.382   | 2.571   | 0.209 | 2.403   | 2.805   |
| 10693 | ENSG00000188554  | NBR1     | -1.2 | 2.509E-08 | 8.287E-07 | 32.647  | 0.935 | 31.889  | 33.692  | 40.982  | 0.898 | 39.969  | 41.682  |
| 10695 | ENSG00000198496  | NBR2     | 1.2  | 0.1204444 | 0.2435289 | 4.968   | 0.703 | 4.194   | 5.565   | 4.193   | 1.112 | 2.910   | 4.890   |
| 10696 | ENSG00000149294  | NCAM1    | -1.1 | 0.1240887 | 0.2491349 | 1.268   | 0.052 | 1.218   | 1.322   | 1.472   | 0.174 | 1.297   | 1.646   |
| 10697 | ENSG00000130287  | NCAN     | -1.4 | 0.0083991 | 0.0317228 | 0.937   | 0.136 | 0.834   | 1.090   | 1.361   | 0.120 | 1.246   | 1.484   |
| 10699 | ENSG00000010292  | NCAPD2   | -1.2 | 1.771E-10 | 1.089E-08 | 145.550 | 2.892 | 142.228 | 147.504 | 183.546 | 4.617 | 178.258 | 186.777 |
| 10702 | ENSG00000151503  | NCAPD3   | -1.1 | 0.0594246 | 0.1445697 | 33.475  | 1.544 | 31.991  | 35.073  | 36.206  | 0.663 | 35.442  | 36.640  |
| 10704 | ENSG000000109805 | NCAPG    | -1.2 | 2.294E-06 | 3.807E-05 | 58.722  | 3.997 | 56.358  | 63.336  | 71.501  | 1.803 | 70.302  | 73.575  |
| 10705 | ENSG00000146918  | NCAPG2   | -1.3 | 4.10E-11  | 2.974E-09 | 74.226  | 0.979 | 73.527  | 75.345  | 96.219  | 3.110 | 92.806  | 98.895  |
| 10706 | ENSG00000121152  | NCAPH    | -1.1 | 0.0043397 | 0.018946  | 50.546  | 1.587 | 49.495  | 52.371  | 57.163  | 1.637 | 55.632  | 58.889  |
| 10707 | ENSG00000114503  | NCBP2    | -1.1 | 0.0563066 | 0.1389833 | 66.962  | 1.483 | 65.998  | 68.670  | 72.289  | 2.178 | 70.544  | 74.730  |
| 10709 | ENSG00000270170  | NBP2-AS2 | -1.3 | 0.0015717 | 0.0084069 | 42.443  | 2.315 | 40.395  | 44.955  | 54.411  | 7.380 | 47.085  | 61.844  |
| 10710 | ENSG00000188505  | NCCRP1   | -1.3 | 0.1018056 | 0.2159315 | 2.322   | 0.272 | 2.017   | 2.538   | 3.022   | 0.502 | 2.447   | 3.376   |
| 10712 | ENSG00000071051  | NCK2     | -1.1 | 0.0137687 | 0.0471398 | 47.860  | 3.338 | 44.098  | 50.466  | 53.813  | 1.553 | 52.355  | 55.446  |
| 10714 | ENSG00000167566  | NCKAP5L  | -1.1 | 0.0534132 | 0.1335568 | 7.707   | 0.344 | 7.366   | 8.054   | 8.797   | 1.009 | 8.120   | 9.956   |

|       | A               | B       | C    | D         | E         | F       | G     | H       | I       | J       | K      | L       | M       |
|-------|-----------------|---------|------|-----------|-----------|---------|-------|---------|---------|---------|--------|---------|---------|
| 10716 | ENSG00000140396 | NCOA2   | 1.1  | 0.0679    | 0.1600994 | 15.661  | 0.552 | 15.035  | 16.078  | 14.935  | 0.661  | 14.199  | 15.475  |
| 10718 | ENSG00000124160 | NCOA5   | 1.2  | 0.0145251 | 0.0492405 | 10.655  | 0.871 | 9.901   | 11.608  | 9.185   | 0.700  | 8.549   | 9.935   |
| 10720 | ENSG00000111912 | NCOA7   | 1.2  | 0.0017264 | 0.009079  | 4.438   | 0.146 | 4.344   | 4.607   | 3.626   | 0.469  | 3.222   | 4.140   |
| 10721 | ENSG00000141027 | NCOR1   | -1.1 | 0.0341729 | 0.0953424 | 31.961  | 0.552 | 31.463  | 32.555  | 34.575  | 0.528  | 34.066  | 35.120  |
| 10726 | ENSG00000196498 | NCOR2   | -1.2 | 0.0005231 | 0.0034739 | 25.975  | 0.432 | 25.525  | 26.387  | 30.791  | 3.128  | 27.882  | 34.100  |
| 10727 | ENSG00000189430 | NCR1    | -3.7 | 0.0006562 | 0.0041674 | 0.235   | 0.137 | 0.156   | 0.394   | 0.916   | 0.497  | 0.529   | 1.477   |
| 10728 | ENSG00000188211 | NCR3LG1 | 2.2  | 7.64E-11  | 5.09E-09  | 4.727   | 0.784 | 4.174   | 5.623   | 2.199   | 0.306  | 1.996   | 2.551   |
| 10729 | ENSG00000107130 | NCS1    | 1.1  | 0.0039065 | 0.0174422 | 25.711  | 2.104 | 23.365  | 27.431  | 23.117  | 2.030  | 21.898  | 25.460  |
| 10730 | ENSG00000162736 | NCSTN   | 1.2  | 4.101E-05 | 0.0004349 | 42.363  | 2.420 | 39.678  | 44.375  | 36.343  | 1.826  | 35.016  | 38.425  |
| 10732 | ENSG00000080986 | NDC80   | -1.2 | 2.317E-05 | 0.0002697 | 39.136  | 2.238 | 37.122  | 41.546  | 49.985  | 5.644  | 44.735  | 55.953  |
| 10733 | ENSG00000072864 | NDE1    | -1.1 | 0.0083242 | 0.0315141 | 15.308  | 0.268 | 15.136  | 15.616  | 17.715  | 1.226  | 16.341  | 18.699  |
| 10734 | ENSG00000166579 | NDEL1   | -1.1 | 0.1132714 | 0.2330325 | 9.762   | 0.264 | 9.458   | 9.930   | 10.716  | 0.460  | 10.405  | 11.245  |
| 10735 | ENSG00000131507 | NDFIP1  | 1.1  | 0.001532  | 0.0082438 | 33.006  | 0.414 | 32.549  | 33.354  | 30.183  | 0.778  | 29.492  | 31.025  |
| 10736 | ENSG00000173376 | NDNF    | -1.4 | 0.0060098 | 0.0243983 | 2.139   | 0.388 | 1.703   | 2.450   | 3.087   | 0.419  | 2.683   | 3.520   |
| 10737 | ENSG00000104419 | NDRG1   | 1.9  | 3.148E-10 | 1.804E-08 | 2.961   | 0.103 | 2.886   | 3.079   | 1.584   | 0.076  | 1.534   | 1.672   |
| 10740 | ENSG00000165795 | NDRG2   | -1.2 | 0.0013482 | 0.00743   | 9.069   | 0.615 | 8.505   | 9.725   | 10.908  | 0.461  | 10.433  | 11.354  |
| 10741 | ENSG00000101079 | NDRG3   | -1.1 | 0.0973815 | 0.2092774 | 35.697  | 0.244 | 35.422  | 35.889  | 39.008  | 1.519  | 37.263  | 40.035  |
| 10743 | ENSG00000164100 | NDST3   | 1.8  | 0.0036954 | 0.0166446 | 0.514   | 0.062 | 0.442   | 0.553   | 0.295   | 0.013  | 0.286   | 0.310   |
| 10744 | ENSG00000125356 | NDUFA1  | -1.1 | 0.0972605 | 0.2091047 | 201.246 | 8.425 | 191.522 | 206.362 | 218.358 | 11.464 | 208.464 | 230.922 |
| 10745 | ENSG00000184752 | NDUFA12 | 1.1  | 0.0643039 | 0.1535467 | 70.754  | 0.495 | 70.347  | 71.306  | 66.863  | 6.712  | 59.113  | 70.801  |
| 10748 | ENSG00000170906 | NDUFA3  | 1.1  | 0.0768759 | 0.1757981 | 41.439  | 1.792 | 39.636  | 43.221  | 39.232  | 1.208  | 38.300  | 40.597  |
| 10750 | ENSG00000189043 | NDUFA4  | -1.1 | 0.042712  | 0.1123815 | 161.306 | 3.921 | 157.029 | 164.732 | 174.373 | 6.220  | 167.567 | 179.763 |
| 10751 | ENSG00000128609 | NDUFA5  | 1.1  | 0.0553803 | 0.1373785 | 24.022  | 0.137 | 23.865  | 24.115  | 22.481  | 1.485  | 20.790  | 23.574  |
| 10752 | ENSG00000164182 | NDUFAF2 | 1.1  | 0.0164382 | 0.054237  | 54.287  | 3.279 | 52.299  | 58.071  | 48.358  | 4.427  | 43.906  | 52.759  |
| 10754 | ENSG00000178057 | NDUFAF3 | -1.1 | 0.0641842 | 0.1533042 | 17.021  | 0.969 | 15.903  | 17.628  | 19.361  | 0.982  | 18.503  | 20.432  |
| 10755 | ENSG00000156170 | NDUFAF6 | 1.2  | 0.0144498 | 0.0490153 | 8.330   | 0.368 | 7.907   | 8.574   | 7.393   | 0.563  | 6.885   | 7.998   |
| 10756 | ENSG00000003509 | NDUFAF7 | 1.2  | 0.000164  | 0.00136   | 34.808  | 1.554 | 33.443  | 36.500  | 29.656  | 2.654  | 27.245  | 32.500  |
| 10757 | ENSG00000224877 | NDUFAF8 | -1.2 | 0.0041251 | 0.0182211 | 25.946  | 1.494 | 24.250  | 27.069  | 32.329  | 4.793  | 29.229  | 37.849  |
| 10758 | ENSG00000183648 | NDUFB1  | -1.1 | 0.0121706 | 0.0427766 | 41.119  | 2.232 | 38.579  | 42.767  | 46.749  | 0.974  | 46.048  | 47.861  |
| 10760 | ENSG00000119013 | NDUFB3  | -1.1 | 0.1012524 | 0.214961  | 71.803  | 2.619 | 69.056  | 74.272  | 79.075  | 3.470  | 75.505  | 82.437  |
| 10761 | ENSG00000151366 | NDUFC2  | 1.1  | 0.0257044 | 0.0765791 | 28.918  | 1.745 | 27.130  | 30.617  | 26.346  | 2.107  | 24.297  | 28.507  |
| 10762 | ENSG00000158864 | NDUFS2  | -1.1 | 0.1010405 | 0.2146047 | 96.200  | 1.263 | 95.114  | 97.586  | 103.396 | 4.017  | 99.834  | 107.750 |
| 10763 | ENSG00000110717 | NDUFS8  | -1.1 | 0.0128244 | 0.0445012 | 35.204  | 0.087 | 35.114  | 35.287  | 39.283  | 0.813  | 38.595  | 40.180  |
| 10764 | ENSG00000178127 | NDUFV2  | -1.6 | 0.0003973 | 0.0027834 | 2.259   | 0.402 | 1.797   | 2.528   | 3.787   | 0.433  | 3.288   | 4.063   |
| 10765 | ENSG00000245532 | NEAT1   | 1.5  | 0.00287   | 0.0135738 | 7.152   | 1.649 | 5.942   | 9.030   | 4.767   | 0.529  | 4.222   | 5.278   |
| 10768 | ENSG00000183091 | NEB     | -1.4 | 0.0001868 | 0.0015111 | 0.480   | 0.058 | 0.435   | 0.546   | 0.684   | 0.041  | 0.660   | 0.732   |
| 10770 | ENSG00000078114 | NEBL    | 1.4  | 8.073E-10 | 4.076E-08 | 9.614   | 0.474 | 9.067   | 9.922   | 7.025   | 0.138  | 6.907   | 7.177   |
| 10771 | ENSG00000123119 | NECAB1  | 2.1  | 1.37E-14  | 2.46E-12  | 14.051  | 0.827 | 13.136  | 14.746  | 6.743   | 0.225  | 6.492   | 6.928   |
| 10772 | ENSG00000110400 | NECTIN1 | 1.1  | 0.009899  | 0.0361525 | 48.252  | 1.411 | 46.780  | 49.592  | 45.178  | 3.830  | 42.561  | 49.574  |
| 10773 | ENSG00000130202 | NECTIN2 | 1.1  | 0.0010747 | 0.0062399 | 94.466  | 2.725 | 91.593  | 97.015  | 86.689  | 5.499  | 82.107  | 92.788  |
| 10774 | ENSG00000177707 | NECTIN3 | 1.1  | 0.0419699 | 0.1109294 | 20.990  | 3.344 | 18.238  | 24.711  | 18.716  | 0.322  | 18.412  | 19.053  |
| 10775 | ENSG00000143217 | NECTIN4 | -1.5 | 0.0204665 | 0.0642326 | 1.198   | 0.235 | 0.936   | 1.391   | 1.793   | 0.565  | 1.197   | 2.322   |
| 10776 | ENSG00000069869 | NEDD4   | 1.9  | 2.30E-11  | 1.768E-09 | 5.803   | 0.710 | 5.355   | 6.622   | 3.130   | 0.080  | 3.056   | 3.215   |

|       | A               | B       | C    | D         | E         | F       | G      | H       | I       | J       | K     | L       | M       |
|-------|-----------------|---------|------|-----------|-----------|---------|--------|---------|---------|---------|-------|---------|---------|
| 10777 | ENSG00000049759 | NEDD4L  | 1.1  | 0.0527572 | 0.1324058 | 16.993  | 0.617  | 16.431  | 17.653  | 16.409  | 0.251 | 16.120  | 16.566  |
| 10778 | ENSG00000129559 | NEDD8   | -1.1 | 0.1192868 | 0.2417902 | 31.841  | 0.814  | 30.983  | 32.603  | 34.587  | 2.098 | 32.477  | 36.673  |
| 10780 | ENSG00000111859 | NEDD9   | 1.5  | 0.0063874 | 0.0255755 | 0.791   | 0.059  | 0.741   | 0.856   | 0.540   | 0.261 | 0.285   | 0.806   |
| 10781 | ENSG00000100285 | NEFH    | -1.2 | 0.0854168 | 0.1905625 | 3.056   | 0.759  | 2.186   | 3.584   | 3.801   | 0.746 | 3.000   | 4.475   |
| 10782 | ENSG00000277586 | NEFL    | -1.3 | 0.0002963 | 0.0021894 | 9.914   | 0.836  | 9.038   | 10.703  | 12.656  | 0.887 | 11.835  | 13.596  |
| 10783 | ENSG00000104722 | NEFM    | -1.1 | 0.0939819 | 0.2043605 | 15.419  | 0.579  | 15.040  | 16.085  | 16.947  | 0.555 | 16.306  | 17.278  |
| 10785 | ENSG00000140398 | NEIL1   | -1.2 | 0.0156937 | 0.0522908 | 2.711   | 0.436  | 2.342   | 3.192   | 3.404   | 0.147 | 3.271   | 3.562   |
| 10786 | ENSG00000154328 | NEIL2   | 1.1  | 0.0175775 | 0.0569299 | 17.806  | 1.286  | 16.674  | 19.204  | 15.865  | 1.836 | 14.324  | 17.896  |
| 10787 | ENSG00000137601 | NEK1    | 1.2  | 0.0028783 | 0.0136056 | 11.180  | 0.724  | 10.403  | 11.836  | 9.789   | 1.069 | 8.660   | 10.786  |
| 10788 | ENSG00000114670 | NEK11   | -1.3 | 0.0662608 | 0.1571987 | 0.839   | 0.140  | 0.689   | 0.966   | 1.118   | 0.145 | 0.966   | 1.256   |
| 10789 | ENSG00000117650 | NEK2    | -1.2 | 6.831E-06 | 9.619E-05 | 46.152  | 2.340  | 44.642  | 48.847  | 58.300  | 3.361 | 55.282  | 61.922  |
| 10790 | ENSG00000119408 | NEK6    | 1.2  | 0.0001661 | 0.0013734 | 14.704  | 0.212  | 14.467  | 14.878  | 12.291  | 0.763 | 11.457  | 12.954  |
| 10791 | ENSG00000151414 | NEK7    | -1.1 | 0.0160399 | 0.0532869 | 13.748  | 0.821  | 12.894  | 14.532  | 15.829  | 0.868 | 14.856  | 16.521  |
| 10792 | ENSG00000160602 | NEK8    | 1.2  | 0.001708  | 0.009007  | 8.801   | 0.368  | 8.460   | 9.192   | 7.364   | 0.340 | 7.080   | 7.740   |
| 10793 | ENSG00000185049 | NELFA   | -1.2 | 0.0012149 | 0.0068676 | 15.942  | 1.190  | 14.628  | 16.944  | 19.168  | 1.503 | 17.743  | 20.739  |
| 10794 | ENSG00000188986 | NELFB   | -1.2 | 7.031E-05 | 0.0006776 | 73.432  | 5.206  | 69.828  | 79.401  | 87.538  | 3.466 | 84.742  | 91.416  |
| 10795 | ENSG00000101158 | NELFCD  | -1.2 | 0.0001061 | 0.0009471 | 17.254  | 0.262  | 16.961  | 17.465  | 20.643  | 0.683 | 20.033  | 21.381  |
| 10796 | ENSG00000165525 | NEMF    | 1.1  | 0.0017191 | 0.0090547 | 22.864  | 0.664  | 22.258  | 23.573  | 20.881  | 0.556 | 20.375  | 21.476  |
| 10798 | ENSG00000166881 | NEMP1   | 1.2  | 1.223E-07 | 3.248E-06 | 91.240  | 2.526  | 88.721  | 93.774  | 77.997  | 2.338 | 76.575  | 80.695  |
| 10799 | ENSG00000189362 | NEMP2   | 1.3  | 0.0001224 | 0.0010669 | 4.868   | 0.117  | 4.798   | 5.004   | 3.681   | 0.410 | 3.276   | 4.096   |
| 10800 | ENSG00000067141 | NEO1    | 1.1  | 6.057E-05 | 0.0006004 | 34.825  | 0.628  | 34.105  | 35.259  | 31.175  | 1.141 | 29.894  | 32.081  |
| 10801 | ENSG00000163608 | NEPRO   | -1.1 | 0.0356035 | 0.0980743 | 23.758  | 0.592  | 23.387  | 24.441  | 26.335  | 1.221 | 25.108  | 27.549  |
| 10803 | ENSG00000132688 | NES     | 1.2  | 6.728E-07 | 1.376E-05 | 232.101 | 10.183 | 220.431 | 239.180 | 202.808 | 3.797 | 198.445 | 205.362 |
| 10804 | ENSG00000173848 | NET1    | -1.2 | 2.986E-06 | 4.769E-05 | 44.323  | 2.780  | 41.544  | 47.105  | 54.743  | 1.272 | 53.324  | 55.779  |
| 10805 | ENSG00000166342 | NETO1   | 1.4  | 7.811E-05 | 0.0007393 | 3.872   | 0.102  | 3.755   | 3.940   | 2.790   | 0.178 | 2.593   | 2.938   |
| 10809 | ENSG00000171208 | NETO2   | 1.5  | 1.538E-06 | 2.723E-05 | 3.603   | 0.312  | 3.286   | 3.910   | 2.451   | 0.131 | 2.300   | 2.533   |
| 10810 | ENSG00000204386 | NEU1    | 1.6  | 4.41E-15  | 8.87E-13  | 36.751  | 3.041  | 34.265  | 40.141  | 22.804  | 0.469 | 22.351  | 23.288  |
| 10811 | ENSG00000162139 | NEU3    | -1.1 | 0.0440677 | 0.1153092 | 13.497  | 0.111  | 13.424  | 13.625  | 14.986  | 0.879 | 13.976  | 15.586  |
| 10812 | ENSG00000107954 | NEURL1  | 1.5  | 0.0041502 | 0.0182984 | 1.373   | 0.178  | 1.261   | 1.578   | 0.921   | 0.033 | 0.883   | 0.942   |
| 10813 | ENSG00000214357 | NEURL1B | -1.2 | 0.0010884 | 0.0063013 | 6.805   | 0.920  | 5.861   | 7.700   | 8.628   | 0.796 | 7.808   | 9.398   |
| 10814 | ENSG00000215041 | NEURL4  | -1.1 | 0.0108682 | 0.038985  | 11.116  | 0.289  | 10.792  | 11.349  | 12.827  | 0.748 | 12.334  | 13.688  |
| 10815 | ENSG00000162614 | NEXN    | 1.2  | 0.0680497 | 0.1603628 | 6.580   | 0.750  | 5.858   | 7.355   | 5.523   | 0.675 | 5.112   | 6.302   |
| 10816 | ENSG00000163531 | NFASC   | -1.5 | 2.835E-07 | 6.688E-06 | 0.952   | 0.081  | 0.861   | 1.016   | 1.475   | 0.051 | 1.420   | 1.522   |
| 10817 | ENSG00000102908 | NFAT5   | 1.2  | 2.063E-05 | 0.000244  | 13.370  | 1.501  | 11.655  | 14.439  | 10.985  | 0.689 | 10.327  | 11.702  |
| 10818 | ENSG00000100968 | NFATC4  | -1.3 | 1.211E-07 | 3.225E-06 | 14.109  | 0.068  | 14.044  | 14.180  | 18.327  | 0.680 | 17.684  | 19.038  |
| 10819 | ENSG00000123405 | NFE2    | -1.5 | 0.0168208 | 0.0551872 | 1.499   | 0.209  | 1.267   | 1.674   | 2.316   | 0.425 | 1.960   | 2.787   |
| 10820 | ENSG00000082641 | NFE2L1  | 1.4  | 1.17E-13  | 1.59E-11  | 140.262 | 8.118  | 130.891 | 145.136 | 105.030 | 2.950 | 101.627 | 106.870 |
| 10821 | ENSG00000116044 | NFE2L2  | 1.4  | 6.286E-10 | 3.242E-08 | 23.092  | 0.934  | 22.299  | 24.121  | 17.036  | 0.470 | 16.753  | 17.578  |
| 10822 | ENSG00000050344 | NFE2L3  | 1.2  | 1.69E-06  | 2.933E-05 | 87.037  | 4.854  | 81.670  | 91.121  | 75.633  | 0.702 | 74.822  | 76.066  |
| 10823 | ENSG00000147862 | NFIB    | 1.3  | 2.697E-05 | 0.0003051 | 4.003   | 0.196  | 3.843   | 4.222   | 3.158   | 0.190 | 2.944   | 3.308   |
| 10824 | ENSG00000141905 | NFIC    | -1.3 | 0.0946782 | 0.205531  | 0.592   | 0.062  | 0.522   | 0.638   | 0.760   | 0.105 | 0.696   | 0.881   |
| 10825 | ENSG00000109320 | NFKB1   | 1.5  | 4.831E-08 | 1.454E-06 | 6.882   | 0.261  | 6.654   | 7.167   | 4.575   | 0.427 | 4.161   | 5.014   |
| 10827 | ENSG00000077150 | NFKB2   | -1.1 | 0.0394291 | 0.1057844 | 15.790  | 0.730  | 15.048  | 16.507  | 18.132  | 2.220 | 16.174  | 20.544  |

|       | A               | B             | C    | D         | E         | F       | G     | H       | I       | J       | K     | L       | M       |
|-------|-----------------|---------------|------|-----------|-----------|---------|-------|---------|---------|---------|-------|---------|---------|
| 10828 | ENSG00000100906 | NFKBIA        | -1.2 | 0.0052843 | 0.0220255 | 11.610  | 0.945 | 10.584  | 12.444  | 14.475  | 1.566 | 13.222  | 16.230  |
| 10829 | ENSG00000104825 | NFKBIB        | 1.1  | 0.0209843 | 0.0655174 | 21.653  | 1.181 | 20.915  | 23.014  | 19.331  | 0.698 | 18.776  | 20.114  |
| 10834 | ENSG00000146232 | NFKBIE        | 1.3  | 4.136E-05 | 0.0004383 | 17.710  | 2.169 | 16.278  | 20.206  | 13.497  | 0.543 | 13.117  | 14.119  |
| 10835 | ENSG00000204498 | NFKBIL1       | -1.2 | 0.0421059 | 0.1112317 | 12.127  | 0.935 | 11.460  | 13.196  | 14.848  | 2.321 | 12.664  | 17.285  |
| 10836 | ENSG00000170448 | NFXL1         | -1.1 | 0.0573677 | 0.1408829 | 27.078  | 0.907 | 26.045  | 27.744  | 29.826  | 0.298 | 29.613  | 30.166  |
| 10837 | ENSG00000120837 | NFYB          | 1.1  | 0.118215  | 0.240309  | 50.870  | 0.849 | 49.915  | 51.541  | 49.062  | 2.816 | 46.532  | 52.096  |
| 10838 | ENSG00000272145 | NFYC-AS1      | -1.2 | 0.0407091 | 0.1084613 | 8.662   | 0.384 | 8.390   | 9.102   | 10.751  | 0.561 | 10.291  | 11.376  |
| 10841 | ENSG00000129460 | NGDN          | -1.1 | 0.0065701 | 0.0261643 | 18.809  | 0.182 | 18.599  | 18.920  | 21.592  | 0.401 | 21.156  | 21.946  |
| 10842 | ENSG00000064300 | NGFR          | 1.1  | 0.0382539 | 0.1032805 | 14.051  | 0.100 | 13.946  | 14.145  | 12.687  | 1.569 | 11.526  | 14.472  |
| 10843 | ENSG00000151092 | NGLY1         | 1.2  | 9.609E-05 | 0.0008752 | 11.283  | 0.578 | 10.736  | 11.889  | 9.570   | 0.480 | 9.017   | 9.882   |
| 10846 | ENSG00000182768 | NGRN          | 1.2  | 5.482E-05 | 0.0005519 | 17.087  | 0.458 | 16.595  | 17.501  | 14.440  | 1.197 | 13.625  | 15.815  |
| 10850 | ENSG00000177551 | NHLH2         | -1.5 | 0.000189  | 0.0015261 | 2.199   | 0.159 | 2.055   | 2.369   | 3.271   | 0.428 | 2.821   | 3.674   |
| 10851 | ENSG00000196865 | NHLRC2        | -1.2 | 5.007E-06 | 7.441E-05 | 13.475  | 0.336 | 13.116  | 13.783  | 16.983  | 1.121 | 15.761  | 17.963  |
| 10853 | ENSG00000188811 | NHLRC3        | 1.2  | 0.0001098 | 0.000973  | 20.187  | 0.895 | 19.351  | 21.131  | 17.324  | 0.986 | 16.720  | 18.462  |
| 10855 | ENSG00000145912 | NHP2          | -1.1 | 0.1112927 | 0.2303063 | 123.215 | 3.090 | 120.951 | 126.736 | 133.259 | 4.171 | 129.639 | 137.820 |
| 10856 | ENSG00000188158 | NHS           | -1.1 | 0.0208111 | 0.0650968 | 13.082  | 0.091 | 12.981  | 13.158  | 14.789  | 0.603 | 14.189  | 15.395  |
| 10857 | ENSG00000135540 | NHSL1         | 1.2  | 0.0008757 | 0.005247  | 5.238   | 0.593 | 4.662   | 5.846   | 4.282   | 0.507 | 3.873   | 4.849   |
| 10858 | ENSG00000204131 | NHSL2         | 1.3  | 4.968E-07 | 1.077E-05 | 7.618   | 0.449 | 7.346   | 8.135   | 6.076   | 0.411 | 5.693   | 6.510   |
| 10860 | ENSG00000116962 | NID1          | 1.1  | 0.0003316 | 0.0023906 | 58.854  | 2.859 | 55.971  | 61.688  | 53.017  | 1.358 | 51.939  | 54.542  |
| 10861 | ENSG00000170113 | NIPA1         | 1.1  | 0.0293209 | 0.0847051 | 16.070  | 0.163 | 15.910  | 16.237  | 15.145  | 0.265 | 14.894  | 15.423  |
| 10862 | ENSG00000140157 | NIPA2         | 1.1  | 0.0047713 | 0.020409  | 69.771  | 1.981 | 67.737  | 71.695  | 64.947  | 0.514 | 64.565  | 65.532  |
| 10863 | ENSG00000104361 | NIPAL2        | 1.7  | 1.836E-05 | 0.0002212 | 2.178   | 0.307 | 1.979   | 2.532   | 1.311   | 0.107 | 1.193   | 1.401   |
| 10864 | ENSG00000164190 | NIPBL         | -1.1 | 0.0063156 | 0.0253478 | 30.793  | 0.898 | 29.810  | 31.570  | 34.190  | 0.873 | 33.182  | 34.703  |
| 10865 | ENSG00000146729 | NIPSNAP2      | -1.1 | 0.0164041 | 0.054135  | 33.325  | 0.540 | 32.737  | 33.799  | 36.917  | 0.440 | 36.441  | 37.308  |
| 10866 | ENSG00000136783 | NIPSNAP3<br>A | 1.3  | 0.0022607 | 0.0111764 | 15.303  | 0.234 | 15.136  | 15.571  | 12.460  | 2.138 | 10.628  | 14.809  |
| 10867 | ENSG00000010322 | NISCH         | 1.1  | 0.0226243 | 0.0694202 | 29.680  | 3.018 | 26.206  | 31.657  | 27.858  | 1.143 | 26.834  | 29.091  |
| 10868 | ENSG00000084628 | NKAIN1        | -1.1 | 0.0119163 | 0.0419789 | 29.938  | 1.587 | 28.125  | 31.074  | 34.156  | 1.923 | 32.182  | 36.024  |
| 10870 | ENSG00000197885 | NKIRAS1       | 1.1  | 0.1208323 | 0.2441329 | 6.467   | 0.622 | 6.083   | 7.185   | 5.801   | 0.843 | 4.999   | 6.679   |
| 10872 | ENSG00000186416 | NKRF          | -1.2 | 0.005881  | 0.0240313 | 9.297   | 0.898 | 8.555   | 10.295  | 11.247  | 0.511 | 10.666  | 11.629  |
| 10873 | ENSG00000073536 | NLE1          | -1.1 | 0.0428046 | 0.1125727 | 19.521  | 0.338 | 19.228  | 19.891  | 21.684  | 1.759 | 20.254  | 23.647  |
| 10875 | ENSG00000169760 | NLGN1         | -1.3 | 0.0019411 | 0.0099362 | 6.947   | 1.011 | 6.056   | 8.046   | 8.987   | 1.125 | 7.820   | 10.065  |
| 10876 | ENSG00000169992 | NLGN2         | -1.1 | 0.0029038 | 0.0136953 | 42.839  | 1.572 | 41.154  | 44.266  | 48.652  | 1.334 | 47.625  | 50.160  |
| 10877 | ENSG00000146938 | NLGN4X        | 1.1  | 0.0795903 | 0.1805649 | 83.254  | 4.473 | 80.119  | 88.377  | 80.700  | 2.640 | 78.072  | 83.353  |
| 10879 | ENSG00000140853 | NLRCS         | 2    | 1.415E-05 | 0.0001787 | 0.729   | 0.092 | 0.662   | 0.834   | 0.364   | 0.138 | 0.249   | 0.518   |
| 10880 | ENSG00000022556 | NLRP2         | 1.2  | 4.911E-06 | 7.319E-05 | 37.277  | 1.444 | 35.705  | 38.544  | 32.132  | 0.978 | 31.009  | 32.796  |
| 10882 | ENSG00000169251 | NMD3          | -1.2 | 4.388E-06 | 6.627E-05 | 43.622  | 0.652 | 42.869  | 44.012  | 53.719  | 2.306 | 51.766  | 56.263  |
| 10885 | ENSG00000123009 | NME2P1        | -1.3 | 0.1123696 | 0.2318138 | 9.957   | 0.512 | 9.536   | 10.527  | 12.926  | 2.627 | 11.144  | 15.943  |
| 10887 | ENSG00000103024 | NME3          | -1.2 | 0.0039701 | 0.0176702 | 38.398  | 3.157 | 36.086  | 41.994  | 46.741  | 5.952 | 42.155  | 53.468  |
| 10888 | ENSG00000172113 | NME6          | -1.3 | 0.0051272 | 0.0215443 | 3.381   | 0.221 | 3.222   | 3.634   | 4.497   | 0.847 | 3.524   | 5.060   |
| 10890 | ENSG00000143156 | NME7          | 1.1  | 0.0566105 | 0.1394892 | 9.448   | 1.001 | 8.830   | 10.603  | 8.608   | 0.798 | 8.116   | 9.529   |
| 10892 | ENSG00000123609 | NMI           | 1.3  | 0.0187592 | 0.059926  | 4.071   | 0.850 | 3.352   | 5.010   | 3.104   | 0.263 | 2.831   | 3.357   |

|       | A               | B         | C    | D         | E         | F       | G      | H       | I       | J       | K      | L       | M       |
|-------|-----------------|-----------|------|-----------|-----------|---------|--------|---------|---------|---------|--------|---------|---------|
| 10893 | ENSG00000157064 | NMNAT2    | -1.1 | 0.0250683 | 0.075094  | 9.966   | 0.643  | 9.582   | 10.709  | 11.392  | 0.522  | 10.859  | 11.902  |
| 10894 | ENSG00000153406 | NMRAL1    | 1.2  | 0.0013562 | 0.0074669 | 23.162  | 0.935  | 22.099  | 23.856  | 20.113  | 1.909  | 17.909  | 21.289  |
| 10895 | ENSG00000077009 | NMRK2     | 1.8  | 6.66E-19  | 3.75E-16  | 236.271 | 1.417  | 235.399 | 237.906 | 131.966 | 4.398  | 127.261 | 135.975 |
| 10896 | ENSG00000152465 | NMT2      | 1.2  | 0.0046925 | 0.0201433 | 11.115  | 0.177  | 10.932  | 11.285  | 9.590   | 0.974  | 8.912   | 10.706  |
| 10897 | ENSG00000053438 | NNAT      | -1.2 | 0.0039339 | 0.0175504 | 21.286  | 2.010  | 19.706  | 23.548  | 26.525  | 2.565  | 24.546  | 29.423  |
| 10898 | ENSG00000112992 | NNT       | 1.2  | 0.0012674 | 0.007098  | 13.980  | 1.110  | 12.786  | 14.980  | 12.338  | 0.544  | 11.740  | 12.804  |
| 10899 | ENSG00000084092 | NOA1      | -1.3 | 2.092E-08 | 7.035E-07 | 35.360  | 1.197  | 33.985  | 36.167  | 46.667  | 0.683  | 46.203  | 47.452  |
| 10900 | ENSG00000141101 | NOB1      | -1.3 | 3.483E-09 | 1.495E-07 | 68.821  | 2.396  | 66.088  | 70.558  | 90.706  | 2.609  | 87.696  | 92.334  |
| 10901 | ENSG00000188976 | NOC2L     | -1.1 | 0.0081487 | 0.0310474 | 50.422  | 0.689  | 49.633  | 50.903  | 56.021  | 2.256  | 54.168  | 58.533  |
| 10903 | ENSG00000184967 | NOC4L     | -1.2 | 0.0249299 | 0.0748252 | 18.141  | 1.691  | 16.383  | 19.756  | 21.520  | 3.132  | 19.518  | 25.129  |
| 10904 | ENSG00000151014 | NOCT      | 1.3  | 5.695E-06 | 8.324E-05 | 19.369  | 1.072  | 18.147  | 20.149  | 14.792  | 0.962  | 13.769  | 15.677  |
| 10905 | ENSG00000156574 | NODAL     | -1.6 | 0.036415  | 0.0997667 | 1.137   | 0.226  | 0.880   | 1.308   | 1.852   | 0.283  | 1.559   | 2.125   |
| 10907 | ENSG00000115761 | NOL10     | -1.1 | 0.0028038 | 0.0133581 | 27.371  | 0.495  | 27.000  | 27.933  | 31.673  | 0.947  | 30.581  | 32.251  |
| 10908 | ENSG00000273899 | NOL12     | -1.3 | 0.0121992 | 0.0428415 | 3.317   | 0.432  | 2.921   | 3.778   | 4.392   | 0.435  | 4.053   | 4.882   |
| 10909 | ENSG00000165271 | NOL6      | -1.1 | 0.0968651 | 0.2084324 | 28.243  | 1.615  | 26.437  | 29.549  | 30.649  | 1.810  | 28.820  | 32.440  |
| 10913 | ENSG00000198000 | NOL8      | 1.2  | 8.745E-05 | 0.00081   | 18.733  | 1.253  | 17.957  | 20.178  | 16.016  | 0.690  | 15.298  | 16.675  |
| 10914 | ENSG00000166197 | NOLC1     | 1.1  | 0.0083442 | 0.0315679 | 185.448 | 2.398  | 182.835 | 187.550 | 177.342 | 3.236  | 175.168 | 181.060 |
| 10915 | ENSG00000147140 | NONO      | -1   | 0.1240444 | 0.2490754 | 255.122 | 6.391  | 247.944 | 260.194 | 270.433 | 3.034  | 268.098 | 273.863 |
| 10917 | ENSG00000182117 | NOP10     | 1.1  | 0.0219653 | 0.0678289 | 343.562 | 10.426 | 333.348 | 354.187 | 324.869 | 6.945  | 316.904 | 329.661 |
| 10918 | ENSG00000249673 | NOP14-AS1 | -1.2 | 0.0413999 | 0.1097658 | 2.518   | 0.286  | 2.278   | 2.834   | 3.017   | 0.172  | 2.913   | 3.216   |
| 10919 | ENSG00000111641 | NOP2      | -1.2 | 0.000146  | 0.00123   | 26.596  | 1.301  | 25.843  | 28.099  | 31.757  | 1.066  | 30.550  | 32.568  |
| 10920 | ENSG00000101361 | NOP56     | -1.1 | 0.0763381 | 0.1747715 | 97.913  | 4.332  | 94.461  | 102.774 | 105.386 | 5.288  | 99.350  | 109.201 |
| 10921 | ENSG00000055044 | NOP58     | 1.2  | 2.634E-07 | 6.284E-06 | 119.681 | 3.754  | 116.943 | 123.960 | 97.834  | 7.369  | 93.434  | 106.342 |
| 10922 | ENSG00000260032 | NORAD     | -1.1 | 3.879E-05 | 0.0004144 | 225.245 | 2.245  | 223.076 | 227.559 | 260.113 | 11.954 | 249.786 | 273.209 |
| 10924 | ENSG00000089250 | NOS1      | -1.3 | 0.0015919 | 0.0084958 | 1.691   | 0.177  | 1.509   | 1.863   | 2.247   | 0.229  | 2.011   | 2.469   |
| 10926 | ENSG00000164867 | NOS3      | 1.3  | 0.0212881 | 0.0662213 | 3.177   | 0.810  | 2.553   | 4.092   | 2.520   | 0.371  | 2.286   | 2.948   |
| 10927 | ENSG00000148400 | NOTCH1    | -1.3 | 6.571E-07 | 1.349E-05 | 30.493  | 1.806  | 28.681  | 32.294  | 40.262  | 3.973  | 36.593  | 44.482  |
| 10928 | ENSG00000134250 | NOTCH2    | -1.1 | 0.0059777 | 0.0243032 | 20.016  | 1.247  | 18.639  | 21.069  | 22.434  | 1.091  | 21.628  | 23.676  |
| 10929 | ENSG00000264343 | NOTCH2NL  | 1.2  | 0.0667257 | 0.1580134 | 1.697   | 0.126  | 1.561   | 1.810   | 1.426   | 0.021  | 1.403   | 1.442   |
| 10930 | ENSG00000074181 | NOTCH3    | -1.2 | 1.858E-05 | 0.0002235 | 36.926  | 0.763  | 36.303  | 37.776  | 45.327  | 4.755  | 41.809  | 50.737  |
| 10933 | ENSG00000104967 | NOVA2     | -1.4 | 7.23E-07  | 1.461E-05 | 5.710   | 0.486  | 5.169   | 6.108   | 7.991   | 0.451  | 7.514   | 8.411   |
| 10934 | ENSG00000086991 | NOX4      | 1.5  | 0.0723211 | 0.1679943 | 0.397   | 0.119  | 0.318   | 0.533   | 0.260   | 0.060  | 0.192   | 0.306   |
| 10936 | ENSG00000130751 | NPAS1     | 1.3  | 0.0013888 | 0.0076063 | 10.079  | 0.858  | 9.092   | 10.643  | 7.892   | 0.825  | 7.398   | 8.844   |
| 10937 | ENSG00000141458 | NPC1      | 1.3  | 1.069E-08 | 3.957E-07 | 17.518  | 0.415  | 17.093  | 17.923  | 13.924  | 0.603  | 13.375  | 14.569  |
| 10938 | ENSG00000119655 | NPC2      | 1.3  | 4.418E-10 | 2.364E-08 | 126.378 | 2.690  | 123.717 | 129.095 | 100.183 | 2.533  | 98.226  | 103.043 |
| 10939 | ENSG00000215440 | NPEPL1    | -1.3 | 3.545E-05 | 0.0003833 | 5.052   | 0.164  | 4.875   | 5.198   | 6.797   | 0.671  | 6.219   | 7.532   |
| 10940 | ENSG00000056291 | NPFFR2    | 2.7  | 0.0002868 | 0.0021351 | 1.297   | 0.353  | 1.010   | 1.691   | 0.492   | 0.125  | 0.354   | 0.597   |
| 10941 | ENSG00000161270 | NPHS1     | -1.5 | 0.0071977 | 0.0281207 | 0.896   | 0.167  | 0.703   | 1.001   | 1.368   | 0.194  | 1.192   | 1.576   |
| 10944 | ENSG00000183426 | NPIPA1    | -1.2 | 0.0038487 | 0.0171975 | 4.321   | 0.308  | 4.079   | 4.668   | 5.319   | 0.101  | 5.240   | 5.432   |
| 10946 | ENSG00000214967 | NPIPA7    | -1.3 | 0.0082442 | 0.0312904 | 10.377  | 0.621  | 9.709   | 10.938  | 13.382  | 0.907  | 12.402  | 14.192  |

|       | A               | B       | C     | D         | E         | F        | G      | H        | I        | J        | K      | L        | M        |
|-------|-----------------|---------|-------|-----------|-----------|----------|--------|----------|----------|----------|--------|----------|----------|
| 10948 | ENSG00000214940 | NPIPA8  | -1.2  | 0.0251264 | 0.0752147 | 9.138    | 0.237  | 8.984    | 9.411    | 11.319   | 0.616  | 10.850   | 12.017   |
| 10950 | ENSG00000196436 | NPIPB15 | -1.5  | 0.0006918 | 0.0043318 | 4.265    | 0.904  | 3.437    | 5.229    | 6.741    | 0.522  | 6.141    | 7.087    |
| 10951 | ENSG00000198156 | NPIPB6  | 1.4   | 0.0737887 | 0.1704436 | 1.679    | 0.271  | 1.417    | 1.958    | 1.217    | 0.275  | 1.034    | 1.533    |
| 10952 | ENSG00000188599 | NPIPP1  | -1.2  | 0.0173048 | 0.0563055 | 11.506   | 0.452  | 11.110   | 11.999   | 14.334   | 0.532  | 13.814   | 14.877   |
| 10954 | ENSG00000135838 | NPL     | 1.4   | 0.0010446 | 0.0060865 | 3.257    | 0.551  | 2.701    | 3.803    | 2.370    | 0.187  | 2.216    | 2.578    |
| 10955 | ENSG00000182446 | NPLOC4  | -1.1  | 0.0584206 | 0.142743  | 24.652   | 0.417  | 24.181   | 24.976   | 26.762   | 1.711  | 25.467   | 28.702   |
| 10956 | ENSG00000181163 | NPM1    | -1.1  | 0.0006782 | 0.0042687 | 993.183  | 14.796 | 976.215  | 1003.398 | 1101.812 | 19.619 | 1089.762 | 1124.450 |
| 10957 | ENSG00000215086 | NPM1P24 | -1.1  | 0.1129155 | 0.2325547 | 133.669  | 11.436 | 121.518  | 144.223  | 146.722  | 6.419  | 141.004  | 153.665  |
| 10958 | ENSG00000249353 | NPM1P27 | -1.1  | 0.017109  | 0.0558295 | 2833.588 | 71.726 | 2783.940 | 2915.823 | 3067.380 | 53.124 | 3034.511 | 3128.669 |
| 10959 | ENSG00000225159 | NPM1P39 | -1.1  | 0.0112876 | 0.0401657 | 178.532  | 9.340  | 169.343  | 188.017  | 200.417  | 7.178  | 193.656  | 207.949  |
| 10961 | ENSG00000258925 | NPM1P5  | -1.1  | 0.0873607 | 0.1937267 | 24.178   | 2.552  | 22.225   | 27.066   | 28.161   | 1.783  | 26.151   | 29.552   |
| 10964 | ENSG00000213881 | NPM1P6  | -1.1  | 0.0062304 | 0.0250891 | 382.142  | 13.374 | 369.229  | 395.934  | 425.231  | 5.092  | 420.498  | 430.618  |
| 10965 | ENSG00000107833 | NPM3    | -1.1  | 0.0681493 | 0.1605752 | 157.907  | 3.587  | 154.745  | 161.805  | 172.668  | 4.509  | 169.357  | 177.803  |
| 10968 | ENSG00000120937 | NPPB    | 3     | 0.1008666 | 0.2144149 | 0.497    | 0.245  | 0.215    | 0.639    | 0.150    | 0.130  | 0.000    | 0.225    |
| 10969 | ENSG00000169418 | NPR1    | 1.2   | 0.0016861 | 0.0089144 | 11.112   | 0.246  | 10.869   | 11.362   | 9.403    | 1.306  | 8.606    | 10.910   |
| 10970 | ENSG00000114388 | NPRL2   | -1.1  | 0.0169472 | 0.0554942 | 12.879   | 0.624  | 12.215   | 13.452   | 15.090   | 1.038  | 14.036   | 16.112   |
| 10971 | ENSG00000103148 | NPRL3   | -1.1  | 0.0901542 | 0.1985387 | 9.654    | 0.748  | 8.981    | 10.460   | 10.755   | 0.250  | 10.504   | 11.004   |
| 10972 | ENSG00000156642 | NPTN    | 1.1   | 0.0012305 | 0.0069371 | 57.531   | 1.754  | 55.586   | 58.993   | 52.076   | 2.654  | 49.030   | 53.891   |
| 10973 | ENSG00000171246 | NPTX1   | -33.6 | 1.57E-29  | 2.65E-25  | 1.394    | 0.583  | 1.057    | 2.067    | 47.936   | 1.168  | 46.870   | 49.185   |
| 10974 | ENSG00000106236 | NPTX2   | 1.4   | 1.64E-06  | 2.859E-05 | 24.777   | 2.892  | 21.833   | 27.614   | 18.084   | 2.419  | 15.911   | 20.691   |
| 10975 | ENSG00000221890 | NPTXR   | 1.2   | 0.008709  | 0.0326163 | 9.674    | 1.526  | 7.913    | 10.600   | 8.101    | 0.456  | 7.762    | 8.619    |
| 10976 | ENSG00000164128 | NPY1R   | 2.3   | 9.52E-14  | 1.35E-11  | 9.261    | 0.588  | 8.589    | 9.678    | 4.184    | 0.387  | 3.742    | 4.458    |
| 10977 | ENSG00000164129 | NPY5R   | 3     | 1.859E-08 | 6.366E-07 | 2.716    | 0.539  | 2.110    | 3.140    | 0.937    | 0.117  | 0.808    | 1.038    |
| 10980 | ENSG00000181019 | NQO1    | 1.7   | 1.79E-11  | 1.429E-09 | 52.645   | 6.690  | 45.419   | 58.622   | 32.498   | 0.561  | 31.881   | 32.977   |
| 10981 | ENSG00000124588 | NQO2    | 1.4   | 4.81E-13  | 5.54E-11  | 17.114   | 0.224  | 16.905   | 17.350   | 12.184   | 0.279  | 11.996   | 12.504   |
| 10982 | ENSG00000174738 | NR1D2   | 1.1   | 0.0141059 | 0.0480607 | 32.549   | 0.902  | 31.717   | 33.508   | 30.265   | 2.085  | 27.991   | 32.087   |
| 10983 | ENSG00000131408 | NR1H2   | -1.1  | 0.0159489 | 0.0530263 | 18.158   | 1.179  | 16.849   | 19.134   | 21.029   | 0.963  | 20.235   | 22.100   |
| 10986 | ENSG00000120798 | NR2C1   | -1.1  | 0.0075577 | 0.0292701 | 16.947   | 0.260  | 16.757   | 17.243   | 19.378   | 0.899  | 18.529   | 20.321   |
| 10987 | ENSG00000177463 | NR2C2   | -1.2  | 1.753E-06 | 3.025E-05 | 17.450   | 0.153  | 17.335   | 17.623   | 21.419   | 1.336  | 19.877   | 22.193   |
| 10989 | ENSG00000184162 | NR2C2AP | 1.1   | 0.0791998 | 0.1800897 | 15.165   | 1.161  | 13.918   | 16.213   | 13.650   | 0.702  | 12.985   | 14.385   |
| 10990 | ENSG00000113580 | NR3C1   | 1.1   | 0.0878344 | 0.1944683 | 3.391    | 0.147  | 3.249    | 3.541    | 3.076    | 0.079  | 2.997    | 3.155    |
| 10991 | ENSG00000151623 | NR3C2   | -1.3  | 0.0970404 | 0.2087035 | 0.643    | 0.132  | 0.492    | 0.737    | 0.854    | 0.071  | 0.799    | 0.935    |
| 10992 | ENSG00000123358 | NR4A1   | 1.2   | 0.0027242 | 0.0130634 | 9.198    | 0.173  | 9.012    | 9.354    | 7.732    | 0.676  | 6.983    | 8.297    |
| 10993 | ENSG00000116833 | NR5A2   | 1.1   | 0.1005518 | 0.2139429 | 3.774    | 0.520  | 3.213    | 4.239    | 3.393    | 0.587  | 2.753    | 3.908    |
| 10995 | ENSG00000198435 | NRARP   | -1.2  | 0.0043725 | 0.01906   | 20.838   | 0.725  | 20.033   | 21.438   | 25.494   | 1.964  | 24.128   | 27.745   |
| 10996 | ENSG00000115216 | NRBP1   | 1.1   | 0.0022162 | 0.0109886 | 84.838   | 2.247  | 82.813   | 87.255   | 79.473   | 0.842  | 78.508   | 80.054   |
| 10998 | ENSG00000091129 | NRCAM   | 1.3   | 0.0001727 | 0.0014169 | 4.295    | 0.399  | 3.837    | 4.562    | 3.331    | 0.234  | 3.071    | 3.524    |
| 10999 | ENSG00000106459 | NRF1    | -1.1  | 0.077402  | 0.1768099 | 12.173   | 0.131  | 12.026   | 12.280   | 13.651   | 0.924  | 12.664   | 14.495   |
| 11000 | ENSG00000157168 | NRG1    | 2.1   | 5.57E-07  | 1.182E-05 | 1.208    | 0.110  | 1.095    | 1.315    | 0.594    | 0.155  | 0.494    | 0.773    |
| 11001 | ENSG00000175352 | NRIP3   | 1.3   | 0.0034285 | 0.0156875 | 7.007    | 0.863  | 6.016    | 7.597    | 5.697    | 0.532  | 5.262    | 6.290    |
| 11004 | ENSG00000123572 | NRK     | -1.4  | 0.0001388 | 0.0011782 | 1.753    | 0.248  | 1.510    | 2.005    | 2.484    | 0.072  | 2.406    | 2.547    |
| 11006 | ENSG00000118257 | NRP2    | 1.6   | 7.816E-10 | 3.981E-08 | 12.052   | 1.654  | 10.861   | 13.940   | 7.663    | 0.599  | 7.253    | 8.351    |
| 11007 | ENSG00000174004 | NRROS   | -1.3  | 0.0147674 | 0.0498126 | 4.037    | 0.215  | 3.789    | 4.163    | 5.237    | 0.284  | 4.998    | 5.550    |



|       | A               | B         | C    | D         | E         | F       | G     | H       | I       | J       | K     | L       | M       |
|-------|-----------------|-----------|------|-----------|-----------|---------|-------|---------|---------|---------|-------|---------|---------|
| 11010 | ENSG00000225377 | NRSN2-AS1 | -1.3 | 0.0289365 | 0.0839026 | 10.491  | 2.630 | 8.684   | 13.508  | 13.769  | 0.927 | 13.160  | 14.836  |
| 11011 | ENSG00000171119 | NRTN      | -1.4 | 0.0684578 | 0.1609882 | 3.025   | 0.973 | 2.284   | 4.127   | 4.390   | 1.948 | 3.081   | 6.628   |
| 11012 | ENSG00000179915 | NRXN1     | -1.3 | 7.644E-07 | 1.528E-05 | 2.335   | 0.162 | 2.179   | 2.503   | 3.200   | 0.243 | 3.008   | 3.472   |
| 11014 | ENSG00000110076 | NRXN2     | -1.4 | 6.925E-05 | 0.00067   | 1.798   | 0.280 | 1.577   | 2.112   | 2.651   | 0.261 | 2.363   | 2.871   |
| 11015 | ENSG00000164346 | NSA2      | -1.1 | 0.0835801 | 0.1877528 | 43.087  | 0.399 | 42.632  | 43.378  | 46.635  | 1.789 | 45.088  | 48.594  |
| 11016 | ENSG00000147548 | NSD3      | -1.1 | 0.0002003 | 0.001598  | 20.241  | 0.679 | 19.839  | 21.025  | 23.369  | 1.054 | 22.218  | 24.287  |
| 11017 | ENSG00000147383 | NSDHL     | 1.3  | 1.452E-07 | 3.778E-06 | 41.799  | 1.768 | 39.933  | 43.449  | 31.987  | 1.988 | 30.344  | 34.197  |
| 11019 | ENSG00000073969 | NSF       | 1.1  | 0.0051865 | 0.0217127 | 19.669  | 1.201 | 18.601  | 20.969  | 17.676  | 1.133 | 16.420  | 18.621  |
| 11023 | ENSG00000035681 | NSMAF     | 1.1  | 0.0103441 | 0.0374783 | 15.337  | 0.239 | 15.136  | 15.601  | 14.017  | 0.597 | 13.502  | 14.672  |
| 11024 | ENSG00000165802 | NSMF      | -1.2 | 9.533E-05 | 0.0008697 | 30.191  | 1.264 | 29.368  | 31.646  | 36.422  | 2.699 | 34.294  | 39.458  |
| 11025 | ENSG00000037474 | NSUN2     | -1.1 | 0.0888271 | 0.196127  | 54.934  | 4.244 | 50.749  | 59.235  | 59.417  | 2.550 | 56.496  | 61.196  |
| 11026 | ENSG00000223705 | NSUN5P1   | -1.3 | 7.051E-07 | 1.428E-05 | 24.057  | 1.817 | 22.869  | 26.149  | 31.242  | 1.874 | 29.499  | 33.224  |
| 11027 | ENSG00000106133 | NSUN5P2   | -1.1 | 0.0676161 | 0.1596081 | 31.116  | 0.942 | 30.034  | 31.752  | 34.631  | 1.620 | 32.770  | 35.730  |
| 11028 | ENSG00000241058 | NSUN6     | -1.1 | 0.0302121 | 0.0867533 | 12.774  | 0.134 | 12.650  | 12.916  | 14.772  | 0.669 | 14.173  | 15.494  |
| 11029 | ENSG00000076685 | NT5C2     | 1.5  | 1.17E-14  | 2.15E-12  | 64.492  | 4.187 | 60.854  | 69.069  | 43.154  | 2.670 | 40.873  | 46.091  |
| 11030 | ENSG00000122643 | NT5C3A    | 1.1  | 0.1068181 | 0.2236462 | 17.196  | 1.987 | 14.992  | 18.852  | 16.067  | 1.199 | 15.005  | 17.367  |
| 11031 | ENSG00000141698 | NT5C3B    | 1.1  | 0.0180835 | 0.0583284 | 50.199  | 3.772 | 46.619  | 54.137  | 46.500  | 3.065 | 44.371  | 50.013  |
| 11032 | ENSG00000178425 | NT5DC1    | 1.1  | 0.0001034 | 0.0009277 | 42.648  | 2.226 | 41.155  | 45.207  | 38.120  | 0.968 | 37.047  | 38.926  |
| 11033 | ENSG00000168268 | NT5DC2    | -1.1 | 0.0067899 | 0.0268061 | 91.524  | 3.047 | 88.042  | 93.704  | 101.023 | 2.279 | 99.092  | 103.537 |
| 11034 | ENSG00000185652 | NTF3      | -1.7 | 0.0122982 | 0.0430283 | 0.779   | 0.216 | 0.607   | 1.021   | 1.363   | 0.262 | 1.170   | 1.661   |
| 11036 | ENSG00000225950 | NTF4      | -1.7 | 0.0023376 | 0.0115097 | 2.389   | 0.744 | 1.910   | 3.245   | 4.111   | 0.422 | 3.635   | 4.440   |
| 11037 | ENSG00000065320 | NTN1      | -1.3 | 0.0021626 | 0.0107768 | 3.513   | 0.324 | 3.146   | 3.758   | 4.578   | 0.366 | 4.209   | 4.942   |
| 11038 | ENSG00000074527 | NTN4      | 1.3  | 0.0376592 | 0.1021376 | 2.370   | 0.382 | 2.074   | 2.802   | 1.862   | 0.509 | 1.502   | 2.444   |
| 11039 | ENSG00000162631 | NTNG1     | 1.9  | 8.144E-06 | 0.0001118 | 1.216   | 0.124 | 1.141   | 1.358   | 0.660   | 0.113 | 0.565   | 0.785   |
| 11040 | ENSG00000133636 | NTS       | -1.6 | 1.028E-07 | 2.804E-06 | 15.809  | 2.018 | 14.536  | 18.135  | 25.163  | 0.878 | 24.470  | 26.150  |
| 11041 | ENSG00000013374 | NUB1      | 1.1  | 0.0230752 | 0.0705095 | 30.174  | 0.813 | 29.571  | 31.099  | 28.350  | 1.196 | 27.141  | 29.533  |
| 11042 | ENSG00000103274 | NUBP1     | 1.1  | 0.0968299 | 0.2083834 | 23.214  | 1.448 | 21.901  | 24.767  | 21.454  | 0.622 | 21.000  | 22.163  |
| 11043 | ENSG00000095906 | NUBP2     | -1.2 | 0.0042256 | 0.0185425 | 17.569  | 0.405 | 17.137  | 17.939  | 20.759  | 1.720 | 19.525  | 22.724  |
| 11045 | ENSG00000090273 | NUDC      | 1.1  | 0.1058196 | 0.2219678 | 111.901 | 2.754 | 108.891 | 114.295 | 108.693 | 4.912 | 103.506 | 113.274 |
| 11046 | ENSG00000120526 | NUDCD1    | -1.1 | 0.0014394 | 0.0078211 | 49.315  | 2.427 | 47.327  | 52.020  | 56.482  | 2.617 | 53.737  | 58.950  |
| 11047 | ENSG00000170584 | NUDCD2    | -1.1 | 0.0672997 | 0.1591503 | 20.419  | 0.517 | 20.057  | 21.011  | 22.274  | 1.389 | 21.143  | 23.825  |
| 11048 | ENSG00000015676 | NUDCD3    | 1.1  | 0.0097596 | 0.0357436 | 19.331  | 1.354 | 17.768  | 20.139  | 18.012  | 0.193 | 17.789  | 18.125  |
| 11049 | ENSG00000112874 | NUDT12    | -1.2 | 5.084E-05 | 0.0005189 | 28.587  | 2.789 | 25.745  | 31.320  | 35.696  | 2.218 | 33.449  | 37.883  |
| 11050 | ENSG00000136159 | NUDT15    | 1.1  | 0.1165883 | 0.2379459 | 93.226  | 8.878 | 87.461  | 103.450 | 89.900  | 3.889 | 87.347  | 94.376  |
| 11053 | ENSG00000198585 | NUDT16    | -1.1 | 0.0003302 | 0.0023819 | 26.746  | 1.695 | 24.870  | 28.169  | 31.216  | 0.965 | 30.652  | 32.330  |
| 11054 | ENSG00000246082 | NUDT16P1  | -1.1 | 0.0146012 | 0.0493998 | 32.825  | 2.497 | 30.142  | 35.082  | 37.988  | 0.938 | 36.944  | 38.762  |
| 11057 | ENSG00000186364 | NUDT17    | 1.7  | 0.0004151 | 0.0028728 | 5.604   | 0.689 | 5.079   | 6.384   | 3.427   | 0.467 | 3.020   | 3.936   |
| 11058 | ENSG00000167005 | NUDT21    | 1.1  | 0.001576  | 0.0084245 | 175.744 | 2.727 | 172.982 | 178.434 | 164.052 | 3.104 | 162.230 | 167.637 |
| 11059 | ENSG00000149761 | NUDT22    | -1.1 | 0.0471663 | 0.12153   | 10.183  | 0.899 | 9.410   | 11.170  | 11.954  | 0.896 | 11.394  | 12.988  |
| 11060 | ENSG00000177144 | NUDT4P1   | -1.1 | 0.0931961 | 0.2029915 | 25.435  | 1.158 | 24.118  | 26.292  | 28.959  | 1.338 | 27.538  | 30.194  |
| 11064 | ENSG00000165609 | NUDT5     | 1.1  | 0.0691175 | 0.1622688 | 67.384  | 3.980 | 64.043  | 71.787  | 65.141  | 1.480 | 63.757  | 66.701  |

|       | A               | B      | C    | D         | E         | F       | G      | H       | I       | J       | K     | L       | M       |
|-------|-----------------|--------|------|-----------|-----------|---------|--------|---------|---------|---------|-------|---------|---------|
| 11066 | ENSG00000170917 | NUDT6  | -1.2 | 0.0100338 | 0.03655   | 3.094   | 0.313  | 2.780   | 3.405   | 3.917   | 0.401 | 3.464   | 4.229   |
| 11072 | ENSG00000140876 | NUDT7  | 1.2  | 0.009595  | 0.0352323 | 22.092  | 1.085  | 21.465  | 23.346  | 18.857  | 1.616 | 16.996  | 19.910  |
| 11073 | ENSG00000170502 | NUDT9  | 1.1  | 0.0453483 | 0.1178875 | 32.084  | 0.223  | 31.903  | 32.333  | 30.016  | 1.536 | 28.244  | 30.977  |
| 11074 | ENSG00000143228 | NUF2   | -1.1 | 0.0244021 | 0.0736036 | 59.582  | 4.275  | 55.349  | 63.897  | 66.410  | 3.983 | 62.290  | 70.239  |
| 11075 | ENSG00000108256 | NUFIP2 | -1.2 | 3.521E-06 | 5.489E-05 | 89.855  | 2.882  | 87.242  | 92.947  | 111.164 | 7.373 | 105.432 | 119.482 |
| 11076 | ENSG00000124789 | NUP153 | 1.1  | 0.0076427 | 0.0295208 | 73.844  | 1.869  | 72.392  | 75.952  | 69.946  | 1.017 | 68.803  | 70.748  |
| 11078 | ENSG00000113569 | NUP155 | -1.1 | 0.0087468 | 0.0327038 | 37.495  | 0.541  | 36.871  | 37.827  | 41.358  | 0.990 | 40.351  | 42.331  |
| 11079 | ENSG00000030066 | NUP160 | -1.3 | 3.947E-10 | 2.16E-08  | 63.015  | 1.734  | 61.072  | 64.405  | 81.409  | 5.117 | 75.603  | 85.266  |
| 11082 | ENSG00000095319 | NUP188 | 1.2  | 4.16E-08  | 1.279E-06 | 51.908  | 2.275  | 49.282  | 53.287  | 42.972  | 2.583 | 40.015  | 44.788  |
| 11083 | ENSG00000155561 | NUP205 | -1.1 | 0.0146151 | 0.0494369 | 123.903 | 1.210  | 122.957 | 125.266 | 134.632 | 2.684 | 131.920 | 137.288 |
| 11084 | ENSG00000132182 | NUP210 | 1.2  | 3.323E-05 | 0.0003631 | 53.198  | 1.439  | 51.916  | 54.754  | 46.846  | 3.546 | 43.608  | 50.636  |
| 11085 | ENSG00000163002 | NUP35  | -1.1 | 0.0828395 | 0.1863915 | 27.319  | 1.082  | 26.107  | 28.190  | 29.875  | 0.889 | 28.956  | 30.731  |
| 11088 | ENSG00000093000 | NUP50  | -1.1 | 0.0046919 | 0.0201433 | 41.645  | 2.296  | 39.957  | 44.260  | 46.814  | 1.040 | 45.615  | 47.470  |
| 11089 | ENSG00000125450 | NUP85  | -1.1 | 0.045563  | 0.1183365 | 27.043  | 1.937  | 24.817  | 28.346  | 29.840  | 0.746 | 29.033  | 30.504  |
| 11091 | ENSG00000108559 | NUP88  | -1.2 | 5.808E-05 | 0.0005798 | 29.577  | 0.534  | 29.127  | 30.167  | 35.152  | 1.022 | 34.117  | 36.160  |
| 11093 | ENSG00000102900 | NUP93  | -1.1 | 0.03692   | 0.1006602 | 39.661  | 0.310  | 39.320  | 39.927  | 42.926  | 0.812 | 42.297  | 43.842  |
| 11096 | ENSG00000110713 | NUP98  | -1.1 | 0.0013179 | 0.0073006 | 40.715  | 1.718  | 38.987  | 42.423  | 45.899  | 2.241 | 43.509  | 47.954  |
| 11099 | ENSG00000137804 | NUSAP1 | -1.2 | 9.206E-07 | 1.786E-05 | 187.425 | 10.345 | 179.703 | 199.179 | 226.265 | 9.560 | 217.544 | 236.486 |
| 11100 | ENSG00000143748 | NVL    | 1.2  | 0.006566  | 0.0041679 | 25.361  | 0.692  | 24.680  | 26.064  | 22.316  | 0.971 | 21.394  | 23.329  |
| 11101 | ENSG00000162231 | NXF1   | -1.1 | 0.0618314 | 0.1489466 | 10.922  | 0.673  | 10.209  | 11.546  | 12.195  | 0.660 | 11.747  | 12.953  |
| 11103 | ENSG00000167693 | NXN    | 1.1  | 0.0017572 | 0.0092098 | 36.491  | 1.895  | 34.325  | 37.839  | 32.753  | 1.851 | 31.325  | 34.844  |
| 11105 | ENSG00000130045 | NXNL2  | 1.5  | 0.0041924 | 0.0184355 | 3.115   | 0.533  | 2.722   | 3.722   | 2.065   | 0.212 | 1.908   | 2.306   |
| 11106 | ENSG00000144815 | NXPE3  | 1.3  | 1.869E-08 | 6.387E-07 | 14.872  | 0.428  | 14.482  | 15.330  | 11.565  | 0.474 | 11.193  | 12.099  |
| 11107 | ENSG00000144227 | NXPH2  | 1.4  | 0.066125  | 0.1569425 | 5.165   | 1.446  | 3.509   | 6.179   | 3.716   | 1.431 | 2.697   | 5.352   |
| 11108 | ENSG00000182575 | NXPH3  | -1.2 | 0.0926652 | 0.2023559 | 1.110   | 0.196  | 0.967   | 1.334   | 1.411   | 0.226 | 1.182   | 1.634   |
| 11109 | ENSG00000182379 | NXPH4  | 1.7  | 0.0154413 | 0.0516125 | 1.654   | 0.255  | 1.373   | 1.871   | 1.023   | 0.391 | 0.795   | 1.475   |
| 11110 | ENSG00000205978 | NYNRIN | -1.1 | 0.0750795 | 0.1725767 | 25.237  | 1.407  | 23.757  | 26.558  | 27.539  | 1.479 | 25.993  | 28.940  |
| 11113 | ENSG00000111331 | OAS3   | 1.2  | 0.1017038 | 0.2157968 | 1.586   | 0.169  | 1.396   | 1.719   | 1.353   | 0.232 | 1.092   | 1.535   |
| 11114 | ENSG00000065154 | OAT    | 1.1  | 0.001134  | 0.0065039 | 109.071 | 6.169  | 104.634 | 116.116 | 100.599 | 2.043 | 98.369  | 102.379 |
| 11115 | ENSG00000180304 | OAZ2   | -1.1 | 0.056707  | 0.1395643 | 82.937  | 2.275  | 80.318  | 84.434  | 89.124  | 3.625 | 86.130  | 93.154  |
| 11118 | ENSG00000154358 | OBSCN  | -1.1 | 0.0010645 | 0.006191  | 4.569   | 0.219  | 4.347   | 4.785   | 5.329   | 0.218 | 5.161   | 5.575   |
| 11119 | ENSG00000124006 | OBSL1  | -1.2 | 0.0017    | 0.008971  | 28.687  | 0.597  | 28.005  | 29.112  | 34.305  | 2.259 | 32.349  | 36.777  |
| 11120 | ENSG00000145247 | OCIAD2 | 1.4  | 3.224E-10 | 1.836E-08 | 72.263  | 5.856  | 66.362  | 78.074  | 53.000  | 2.123 | 51.146  | 55.315  |
| 11121 | ENSG00000197822 | OCLN   | 1.2  | 8.484E-05 | 0.0007893 | 15.909  | 0.286  | 15.579  | 16.092  | 13.683  | 0.549 | 13.078  | 14.149  |
| 11123 | ENSG00000122126 | OCRL   | 1.2  | 6.19E-05  | 0.0006108 | 51.572  | 2.429  | 48.874  | 53.584  | 45.656  | 1.950 | 43.870  | 47.736  |
| 11124 | ENSG00000136811 | ODF2   | 1.1  | 0.1208735 | 0.2441869 | 14.825  | 1.189  | 14.088  | 16.197  | 14.143  | 0.661 | 13.749  | 14.906  |
| 11125 | ENSG00000105953 | OGDH   | 1.1  | 0.0001719 | 0.0014116 | 49.444  | 1.117  | 48.717  | 50.729  | 44.595  | 0.102 | 44.525  | 44.712  |
| 11132 | ENSG00000197444 | OGDHL  | 1.4  | 1.879E-08 | 6.406E-07 | 14.154  | 0.367  | 13.821  | 14.548  | 10.320  | 0.362 | 9.942   | 10.663  |
| 11134 | ENSG00000181396 | OGFOD3 | 1.1  | 0.0540246 | 0.1348264 | 8.306   | 0.712  | 7.508   | 8.877   | 7.529   | 0.516 | 7.096   | 8.100   |
| 11135 | ENSG00000060491 | OGFR   | -1.3 | 1.133E-05 | 0.0001482 | 12.495  | 0.415  | 12.191  | 12.968  | 16.485  | 1.451 | 15.061  | 17.962  |
| 11136 | ENSG00000119900 | OGFRL1 | 1.6  | 1.102E-10 | 7.036E-09 | 9.984   | 0.647  | 9.383   | 10.668  | 6.502   | 0.742 | 6.031   | 7.357   |
| 11140 | ENSG00000147162 | OGT    | -1.1 | 0.0146684 | 0.0495577 | 98.126  | 3.045  | 94.708  | 100.548 | 108.458 | 2.002 | 106.843 | 110.698 |
| 11141 | ENSG00000104147 | OIP5   | -1.2 | 0.002003  | 0.0101842 | 55.361  | 1.935  | 54.001  | 57.577  | 65.859  | 4.526 | 61.190  | 70.228  |

|       | A               | B         | C    | D          | E         | F       | G     | H       | I       | J       | K     | L       | M       |
|-------|-----------------|-----------|------|------------|-----------|---------|-------|---------|---------|---------|-------|---------|---------|
| 11142 | ENSG00000138430 | OLA1      | -1.1 | 0.0018541  | 0.0095724 | 58.182  | 0.992 | 57.070  | 58.975  | 65.327  | 1.644 | 63.718  | 67.004  |
| 11143 | ENSG00000213790 | OLA1P1    | -1.1 | 0.1090288  | 0.2270382 | 32.281  | 0.795 | 31.541  | 33.121  | 36.361  | 3.599 | 32.205  | 38.443  |
| 11144 | ENSG00000105088 | OLFM2     | -1.1 | 0.0008805  | 0.0052689 | 74.308  | 5.791 | 67.621  | 77.711  | 86.267  | 3.393 | 83.176  | 89.898  |
| 11145 | ENSG00000118733 | OLFM3     | -1.5 | 0.0871876  | 0.1934668 | 0.319   | 0.105 | 0.199   | 0.395   | 0.499   | 0.102 | 0.381   | 0.558   |
| 11146 | ENSG00000185585 | OLFML2A   | 1.5  | 3.976E-09  | 1.665E-07 | 11.871  | 0.322 | 11.534  | 12.177  | 8.086   | 0.384 | 7.758   | 8.509   |
| 11150 | ENSG00000162745 | OLFML2B   | -1.3 | 0.0002662  | 0.0020127 | 9.399   | 0.701 | 8.609   | 9.947   | 12.344  | 0.734 | 11.869  | 13.190  |
| 11152 | ENSG00000116774 | OLFML3    | 1.2  | 1.874E-05  | 0.0002249 | 117.534 | 6.926 | 109.805 | 123.178 | 102.783 | 4.065 | 100.097 | 107.460 |
| 11153 | ENSG00000235823 | OLMALINC  | 1.7  | 1.67E-15   | 3.49E-13  | 48.186  | 0.231 | 47.924  | 48.357  | 28.364  | 1.822 | 26.299  | 29.747  |
| 11154 | ENSG00000162600 | OMA1      | 1.1  | 0.0851285  | 0.190031  | 12.667  | 0.663 | 11.901  | 13.073  | 11.708  | 0.315 | 11.400  | 12.030  |
| 11155 | ENSG00000169856 | ONECUT1   | -1.7 | 0.000233   | 0.0018048 | 1.219   | 0.238 | 0.998   | 1.471   | 2.094   | 0.227 | 1.951   | 2.356   |
| 11156 | ENSG00000119547 | ONECUT2   | -1.5 | 5.39E-05   | 0.0005439 | 0.998   | 0.071 | 0.919   | 1.056   | 1.511   | 0.115 | 1.387   | 1.614   |
| 11157 | ENSG00000125741 | OPA3      | 1.1  | 0.0604282  | 0.1465221 | 6.001   | 0.455 | 5.733   | 6.526   | 5.521   | 0.556 | 5.188   | 6.163   |
| 11158 | ENSG00000183715 | OPCML     | -1.6 | 2.46E-05   | 0.0002834 | 1.205   | 0.181 | 1.032   | 1.393   | 2.004   | 0.099 | 1.893   | 2.079   |
| 11160 | ENSG00000054277 | OPN3      | 1.2  | 0.0006461  | 0.0041191 | 19.640  | 1.855 | 17.601  | 21.231  | 16.493  | 1.470 | 15.212  | 18.098  |
| 11161 | ENSG00000116329 | OPRD1     | 1.2  | 0.0083862  | 0.0316933 | 2.610   | 0.230 | 2.354   | 2.798   | 2.138   | 0.312 | 1.911   | 2.494   |
| 11162 | ENSG00000188770 | OPTC      | -1.5 | 0.0230368  | 0.0704283 | 1.743   | 0.281 | 1.425   | 1.957   | 2.746   | 0.387 | 2.514   | 3.193   |
| 11163 | ENSG00000123240 | OPTN      | 1.4  | 2.987E-07  | 6.987E-06 | 17.234  | 1.662 | 15.402  | 18.645  | 12.688  | 0.365 | 12.302  | 13.028  |
| 11164 | ENSG00000276045 | ORAI1     | 1.3  | 0.0001302  | 0.0011222 | 21.560  | 1.911 | 19.693  | 23.513  | 17.058  | 0.994 | 16.305  | 18.184  |
| 11168 | ENSG00000149716 | ORAOV1    | -1.2 | 0.00228105 | 0.0698831 | 4.260   | 0.344 | 4.032   | 4.656   | 5.056   | 0.463 | 4.537   | 5.425   |
| 11169 | ENSG00000085840 | ORC1      | -1.1 | 0.0641194  | 0.1532578 | 44.067  | 3.553 | 40.734  | 47.805  | 48.286  | 0.708 | 47.470  | 48.739  |
| 11171 | ENSG00000115942 | ORC2      | -1.1 | 0.0023601  | 0.0116104 | 36.002  | 1.494 | 35.082  | 37.726  | 40.923  | 1.536 | 39.337  | 42.403  |
| 11174 | ENSG00000135506 | OS9       | 1.2  | 4.668E-05  | 0.000485  | 51.796  | 2.120 | 49.790  | 54.014  | 45.139  | 2.670 | 42.198  | 47.410  |
| 11177 | ENSG00000110048 | OSBP      | -1.2 | 8.337E-07  | 1.636E-05 | 37.510  | 1.578 | 35.701  | 38.603  | 46.560  | 2.320 | 44.254  | 48.893  |
| 11179 | ENSG00000144645 | OSBPL10   | -1.1 | 0.0008095  | 0.0049177 | 11.512  | 0.523 | 10.948  | 11.980  | 13.346  | 0.504 | 12.877  | 13.879  |
| 11180 | ENSG00000144909 | OSBPL11   | -1.2 | 0.0012667  | 0.0070961 | 20.462  | 0.940 | 19.741  | 21.525  | 24.274  | 0.776 | 23.436  | 24.967  |
| 11181 | ENSG00000130703 | OSBPL2    | -1.1 | 0.0350762  | 0.0971182 | 10.501  | 0.276 | 10.296  | 10.815  | 11.677  | 0.639 | 11.288  | 12.415  |
| 11183 | ENSG00000006025 | OSBPL7    | -1.2 | 0.0264077  | 0.0781344 | 2.817   | 0.407 | 2.518   | 3.280   | 3.571   | 0.559 | 3.213   | 4.215   |
| 11184 | ENSG00000091039 | OSBPL8    | 1.1  | 0.0034626  | 0.0158109 | 55.036  | 3.197 | 52.435  | 58.605  | 50.869  | 2.634 | 47.883  | 52.862  |
| 11185 | ENSG00000117859 | OSBPL9    | 1.2  | 1.108E-05  | 0.0001455 | 40.816  | 1.934 | 38.893  | 42.760  | 36.072  | 1.024 | 35.365  | 37.247  |
| 11187 | ENSG00000170909 | OSCAR     | -1.4 | 0.0184449  | 0.0591962 | 2.724   | 0.247 | 2.481   | 2.976   | 3.925   | 0.765 | 3.204   | 4.728   |
| 11188 | ENSG00000116885 | OSCP1     | 1.3  | 0.0846232  | 0.1893414 | 2.091   | 0.436 | 1.642   | 2.512   | 1.658   | 0.091 | 1.560   | 1.739   |
| 11189 | ENSG00000223891 | OSER1-AS1 | -1.2 | 0.0258979  | 0.076979  | 6.370   | 0.445 | 5.880   | 6.747   | 8.042   | 0.952 | 7.104   | 9.009   |
| 11190 | ENSG00000092094 | OSGEP     | 1.1  | 0.0225424  | 0.0691941 | 14.754  | 0.680 | 14.255  | 15.529  | 13.594  | 0.156 | 13.443  | 13.755  |
| 11191 | ENSG00000128694 | OSGEPL1   | -1.2 | 0.0013607  | 0.0074841 | 17.365  | 1.424 | 15.759  | 18.473  | 21.638  | 1.986 | 20.155  | 23.894  |
| 11192 | ENSG00000164823 | OSGIN2    | 1.2  | 0.0021666  | 0.0107936 | 22.551  | 1.595 | 21.070  | 24.239  | 19.782  | 1.943 | 17.949  | 21.819  |
| 11193 | ENSG00000145623 | OSMR      | 1.8  | 1.754E-08  | 6.029E-07 | 3.648   | 0.237 | 3.398   | 3.869   | 2.085   | 0.334 | 1.700   | 2.303   |
| 11195 | ENSG00000228474 | OST4      | -1.1 | 0.0001757  | 0.0014381 | 227.435 | 4.387 | 223.007 | 231.781 | 265.263 | 7.431 | 256.713 | 270.163 |
| 11196 | ENSG00000081087 | OSTM1     | 1.2  | 0.0003493  | 0.0024987 | 16.080  | 0.965 | 15.444  | 17.191  | 13.754  | 0.884 | 13.007  | 14.730  |
| 11197 | ENSG00000167770 | OTUB1     | -1.1 | 0.1074799  | 0.2248093 | 40.204  | 0.442 | 39.761  | 40.645  | 43.214  | 1.581 | 41.532  | 44.669  |
| 11198 | ENSG00000089723 | OTUB2     | -1.2 | 0.0422902  | 0.111602  | 3.600   | 0.329 | 3.229   | 3.854   | 4.431   | 0.428 | 3.945   | 4.749   |
| 11199 | ENSG00000165312 | OTUD1     | -1.2 | 0.0069793  | 0.0274577 | 8.249   | 0.290 | 7.954   | 8.534   | 10.378  | 0.284 | 10.078  | 10.643  |

|       | A               | B        | C    | D         | E         | F       | G      | H       | I       | J       | K      | L       | M       |
|-------|-----------------|----------|------|-----------|-----------|---------|--------|---------|---------|---------|--------|---------|---------|
| 11200 | ENSG00000169914 | OTUD3    | -1.2 | 0.0006156 | 0.0039634 | 15.512  | 0.989  | 14.487  | 16.462  | 18.561  | 0.544  | 17.969  | 19.039  |
| 11202 | ENSG00000164164 | OTUD4    | 1.1  | 0.1150889 | 0.2357106 | 32.366  | 1.310  | 31.288  | 33.825  | 31.392  | 1.943  | 29.410  | 33.295  |
| 11203 | ENSG00000154124 | OTULIN   | 1.1  | 0.0028408 | 0.0134623 | 13.350  | 0.182  | 13.181  | 13.543  | 12.006  | 0.740  | 11.348  | 12.806  |
| 11204 | ENSG00000165588 | OTX2     | -1.7 | 1.128E-09 | 5.419E-08 | 24.358  | 2.778  | 21.208  | 26.459  | 41.573  | 5.129  | 35.703  | 45.185  |
| 11208 | ENSG00000085465 | OVGP1    | -1.5 | 1.319E-05 | 0.0001689 | 4.905   | 0.116  | 4.777   | 5.004   | 7.686   | 0.633  | 6.957   | 8.103   |
| 11209 | ENSG00000172818 | OVOL1    | -1.3 | 0.0040806 | 0.0180386 | 4.360   | 0.424  | 3.948   | 4.795   | 5.867   | 1.137  | 4.559   | 6.623   |
| 11210 | ENSG00000155463 | OXA1L    | 1.1  | 0.0175547 | 0.056867  | 77.268  | 1.208  | 75.967  | 78.354  | 73.242  | 3.468  | 70.173  | 77.005  |
| 11212 | ENSG00000083720 | OXCT1    | 1.2  | 0.0001507 | 0.0012627 | 35.850  | 1.000  | 34.746  | 36.696  | 30.975  | 2.502  | 29.247  | 33.844  |
| 11215 | ENSG00000151093 | OXSM     | 1.3  | 0.0296225 | 0.0854082 | 4.111   | 0.716  | 3.447   | 4.870   | 3.232   | 0.228  | 3.061   | 3.491   |
| 11216 | ENSG00000083454 | P2RX5    | -1.3 | 0.0546598 | 0.1360301 | 1.555   | 0.150  | 1.446   | 1.727   | 2.061   | 0.200  | 1.832   | 2.202   |
| 11218 | ENSG00000089041 | P2RX7    | 1.4  | 0.0850685 | 0.189961  | 0.605   | 0.105  | 0.510   | 0.719   | 0.440   | 0.016  | 0.421   | 0.451   |
| 11219 | ENSG00000169860 | P2RY1    | -1.2 | 0.0024105 | 0.0117924 | 12.925  | 1.031  | 11.759  | 13.713  | 15.288  | 1.036  | 14.420  | 16.435  |
| 11220 | ENSG00000244165 | P2RY11   | 1.5  | 0.0027937 | 0.0133173 | 4.323   | 0.731  | 3.765   | 5.150   | 2.949   | 0.541  | 2.327   | 3.316   |
| 11221 | ENSG00000175591 | P2RY2    | -1.8 | 0.0051498 | 0.0216179 | 0.707   | 0.361  | 0.365   | 1.084   | 1.321   | 0.129  | 1.203   | 1.458   |
| 11223 | ENSG00000090530 | P3H2     | -1.2 | 0.0048613 | 0.0207102 | 20.114  | 2.391  | 18.527  | 22.865  | 23.837  | 2.323  | 21.821  | 26.377  |
| 11225 | ENSG00000141696 | P3H4     | -1.2 | 0.0001003 | 0.0009065 | 16.203  | 0.605  | 15.623  | 16.831  | 20.311  | 0.433  | 19.991  | 20.804  |
| 11226 | ENSG00000122884 | P4HA1    | -1.3 | 1.596E-07 | 4.103E-06 | 35.728  | 1.135  | 34.630  | 36.897  | 46.824  | 3.893  | 44.406  | 51.315  |
| 11229 | ENSG00000072682 | P4HA2    | -1.4 | 8.164E-05 | 0.000765  | 2.799   | 0.157  | 2.622   | 2.919   | 3.941   | 0.344  | 3.631   | 4.311   |
| 11233 | ENSG00000170515 | PA2G4    | -1.1 | 0.0065645 | 0.0261545 | 119.654 | 2.003  | 117.381 | 121.157 | 132.194 | 2.709  | 129.089 | 134.074 |
| 11234 | ENSG00000175575 | PAAF1    | 1.1  | 0.0386827 | 0.1041921 | 10.376  | 0.349  | 10.107  | 10.771  | 9.589   | 0.424  | 9.231   | 10.057  |
| 11235 | ENSG00000070756 | PABPC1   | -1.1 | 1.641E-05 | 0.0002004 | 781.720 | 14.564 | 765.011 | 791.726 | 890.025 | 17.641 | 869.660 | 900.611 |
| 11236 | ENSG00000101104 | PABPC1L  | 1.1  | 0.0960046 | 0.2073195 | 21.925  | 1.190  | 20.559  | 22.736  | 20.768  | 0.805  | 19.926  | 21.531  |
| 11239 | ENSG00000230673 | PABPC1P3 | -1.2 | 0.0650875 | 0.1549147 | 18.091  | 0.811  | 17.315  | 18.933  | 22.569  | 0.714  | 21.815  | 23.234  |
| 11240 | ENSG00000151846 | PABPC3   | -1.1 | 0.0101825 | 0.0369979 | 19.021  | 0.708  | 18.320  | 19.736  | 22.058  | 0.209  | 21.818  | 22.200  |
| 11242 | ENSG00000090621 | PABPC4   | 1.1  | 0.0021565 | 0.0107525 | 83.167  | 2.052  | 80.811  | 84.555  | 78.232  | 1.203  | 76.861  | 79.110  |
| 11243 | ENSG00000174740 | PABPC5   | -1.3 | 0.0449921 | 0.1171595 | 3.906   | 0.868  | 3.212   | 4.879   | 5.020   | 1.228  | 4.006   | 6.385   |
| 11245 | ENSG00000179364 | PACS2    | -1.1 | 0.1129481 | 0.2325935 | 10.344  | 0.233  | 10.091  | 10.552  | 11.264  | 0.935  | 10.367  | 12.233  |
| 11246 | ENSG00000165912 | PACSIN3  | 1.1  | 0.0508946 | 0.1287594 | 37.675  | 0.804  | 37.138  | 38.599  | 35.193  | 2.087  | 32.868  | 36.906  |
| 11248 | ENSG00000142619 | PADI3    | 1.3  | 0.0018505 | 0.0095651 | 5.372   | 0.280  | 5.093   | 5.652   | 4.100   | 0.098  | 3.993   | 4.187   |
| 11249 | ENSG00000006712 | PAF1     | -1.2 | 0.0018392 | 0.009536  | 21.409  | 1.406  | 20.433  | 23.021  | 25.977  | 1.858  | 24.389  | 28.021  |
| 11250 | ENSG00000007168 | PAFAH1B1 | 1.1  | 0.0677336 | 0.1598185 | 55.761  | 1.703  | 53.906  | 57.251  | 54.179  | 0.857  | 53.226  | 54.888  |
| 11251 | ENSG00000168092 | PAFAH1B2 | -1.1 | 0.0040709 | 0.0180051 | 41.260  | 0.791  | 40.392  | 41.941  | 46.254  | 2.574  | 43.984  | 49.051  |
| 11252 | ENSG00000158006 | PAFAH2   | 1.1  | 0.0843378 | 0.1889109 | 13.390  | 0.345  | 13.021  | 13.706  | 12.472  | 0.899  | 11.532  | 13.323  |
| 11254 | ENSG00000076641 | PAG1     | 4.8  | 2.422E-05 | 0.0002795 | 0.188   | 0.046  | 0.135   | 0.214   | 0.039   | 0.022  | 0.014   | 0.056   |
| 11255 | ENSG00000280789 | PAGR1    | -1.2 | 0.0238865 | 0.0724001 | 9.776   | 0.643  | 9.282   | 10.503  | 12.091  | 0.988  | 11.178  | 13.140  |
| 11256 | ENSG00000171759 | PAH      | 1.8  | 4.029E-08 | 1.243E-06 | 4.885   | 0.537  | 4.545   | 5.504   | 2.830   | 0.454  | 2.547   | 3.355   |
| 11257 | ENSG00000128050 | PAICS    | -1.1 | 8.422E-05 | 0.0007843 | 242.590 | 2.545  | 239.655 | 244.206 | 273.560 | 3.613  | 269.469 | 276.314 |
| 11258 | ENSG00000254244 | PAICSP4  | -1.1 | 0.0416899 | 0.110328  | 39.894  | 0.946  | 38.920  | 40.809  | 45.239  | 2.737  | 43.287  | 48.368  |
| 11260 | ENSG00000172239 | PAIP1    | 1.1  | 0.0099966 | 0.036438  | 44.581  | 1.270  | 43.115  | 45.333  | 41.306  | 1.896  | 39.765  | 43.424  |
| 11261 | ENSG00000120727 | PAIP2    | 1.1  | 0.0112303 | 0.039997  | 164.091 | 5.860  | 157.330 | 167.702 | 155.223 | 7.721  | 146.345 | 160.365 |
| 11262 | ENSG00000124374 | PAIP2B   | 1.1  | 0.0037352 | 0.0167923 | 37.366  | 1.303  | 35.992  | 38.585  | 34.673  | 0.414  | 34.401  | 35.150  |

|       | A               | B          | C    | D         | E         | F       | G     | H       | I       | J       | K      | L       | M       |
|-------|-----------------|------------|------|-----------|-----------|---------|-------|---------|---------|---------|--------|---------|---------|
| 11263 | ENSG00000149269 | PAK1       | -1.1 | 0.0485632 | 0.1242023 | 67.733  | 1.111 | 66.451  | 68.402  | 73.001  | 0.847  | 72.091  | 73.767  |
| 11264 | ENSG00000077264 | PAK3       | -1.6 | 9.811E-10 | 4.796E-08 | 4.262   | 0.394 | 3.851   | 4.638   | 6.835   | 0.207  | 6.672   | 7.068   |
| 11265 | ENSG00000130669 | PAK4       | -1.2 | 0.0036989 | 0.0166472 | 17.780  | 2.159 | 15.543  | 19.851  | 21.183  | 1.004  | 20.386  | 22.311  |
| 11266 | ENSG00000083093 | PALB2      | 1.1  | 0.0109236 | 0.039167  | 23.464  | 0.328 | 23.234  | 23.840  | 21.431  | 0.823  | 20.480  | 21.910  |
| 11267 | ENSG00000129116 | PALLD      | 1.5  | 2.77E-12  | 2.726E-10 | 16.781  | 1.258 | 15.328  | 17.515  | 11.248  | 0.605  | 10.610  | 11.814  |
| 11268 | ENSG00000243444 | PALM2      | 1.6  | 0.0516032 | 0.1300692 | 0.529   | 0.105 | 0.418   | 0.627   | 0.343   | 0.087  | 0.283   | 0.443   |
| 11271 | ENSG00000187867 | PALM3      | -1.1 | 0.0104365 | 0.0377891 | 31.953  | 1.957 | 30.096  | 33.997  | 36.953  | 1.659  | 35.117  | 38.343  |
| 11272 | ENSG00000135473 | PAN2       | -1.2 | 8.822E-06 | 0.0001198 | 22.489  | 1.195 | 21.555  | 23.836  | 27.813  | 1.143  | 26.494  | 28.490  |
| 11275 | ENSG00000125779 | PANK2      | 1.1  | 0.0014545 | 0.007887  | 21.429  | 0.389 | 20.999  | 21.757  | 19.319  | 0.816  | 18.549  | 20.174  |
| 11276 | ENSG00000110218 | PANX1      | -1.2 | 6.808E-05 | 0.0006602 | 26.765  | 0.774 | 25.877  | 27.300  | 32.985  | 0.586  | 32.546  | 33.651  |
| 11277 | ENSG00000121274 | PAPD5      | -1.1 | 0.0424668 | 0.1118768 | 8.973   | 0.104 | 8.901   | 9.092   | 10.008  | 0.117  | 9.878   | 10.103  |
| 11278 | ENSG00000112941 | PAPD7      | -1.2 | 0.000132  | 0.0011342 | 16.531  | 0.751 | 15.788  | 17.289  | 20.073  | 1.115  | 18.837  | 21.005  |
| 11279 | ENSG00000100767 | PAPLN      | -1.5 | 2.172E-07 | 5.279E-06 | 7.075   | 1.047 | 5.887   | 7.868   | 10.772  | 1.257  | 9.321   | 11.498  |
| 11280 | ENSG00000090060 | PAPOLA     | -1.2 | 4.306E-07 | 9.507E-06 | 63.021  | 3.277 | 59.969  | 66.484  | 76.450  | 3.852  | 73.793  | 80.868  |
| 11283 | ENSG00000198682 | PAPSS2     | -1.3 | 2.118E-07 | 5.185E-06 | 17.803  | 0.843 | 17.151  | 18.755  | 24.037  | 1.853  | 22.807  | 26.169  |
| 11284 | ENSG00000163291 | PAQR3      | 1.3  | 2.916E-07 | 6.85E-06  | 13.633  | 0.441 | 13.189  | 14.070  | 10.967  | 0.305  | 10.697  | 11.298  |
| 11285 | ENSG00000162073 | PAQR4      | 1.2  | 0.0077965 | 0.0300164 | 19.177  | 1.983 | 17.189  | 21.155  | 16.840  | 0.612  | 16.199  | 17.419  |
| 11291 | ENSG00000137819 | PAQR5      | 1.1  | 0.0878833 | 0.1945511 | 7.114   | 0.690 | 6.607   | 7.899   | 6.550   | 0.295  | 6.328   | 6.885   |
| 11293 | ENSG00000160781 | PAQR6      | 1.2  | 0.0554676 | 0.1374942 | 4.696   | 0.863 | 3.935   | 5.633   | 3.860   | 0.455  | 3.334   | 4.139   |
| 11295 | ENSG00000182749 | PAQR7      | 1.2  | 0.036023  | 0.0989525 | 8.776   | 0.290 | 8.469   | 9.046   | 7.704   | 0.084  | 7.631   | 7.795   |
| 11297 | ENSG00000148498 | PARD3      | -1.1 | 0.0210803 | 0.0657806 | 35.701  | 1.801 | 34.107  | 37.654  | 39.467  | 1.577  | 38.270  | 41.254  |
| 11303 | ENSG00000116117 | PARD3B     | 1.3  | 0.0021991 | 0.0109201 | 2.401   | 0.075 | 2.325   | 2.474   | 1.885   | 0.274  | 1.586   | 2.124   |
| 11304 | ENSG00000267270 | PARD6G-AS1 | -1.6 | 0.0008512 | 0.0051307 | 1.216   | 0.151 | 1.062   | 1.364   | 2.013   | 0.458  | 1.557   | 2.473   |
| 11305 | ENSG00000175193 | PARL       | -1.2 | 0.0374425 | 0.1016802 | 8.857   | 1.366 | 7.686   | 10.357  | 10.654  | 0.203  | 10.522  | 10.887  |
| 11306 | ENSG00000140694 | PARN       | 1.1  | 0.0093339 | 0.034423  | 40.583  | 0.766 | 39.847  | 41.376  | 37.929  | 1.370  | 36.940  | 39.494  |
| 11307 | ENSG00000143799 | PARP1      | -1.1 | 0.0053823 | 0.0223553 | 285.501 | 9.431 | 274.695 | 292.068 | 312.876 | 10.244 | 301.358 | 320.964 |
| 11308 | ENSG00000111224 | PARP11     | 1.2  | 0.0120554 | 0.042407  | 8.778   | 0.545 | 8.364   | 9.396   | 7.722   | 0.817  | 6.786   | 8.291   |
| 11310 | ENSG00000173193 | PARP14     | 1.2  | 0.0005056 | 0.0033894 | 16.057  | 1.145 | 14.735  | 16.741  | 14.171  | 0.698  | 13.367  | 14.629  |
| 11311 | ENSG00000138617 | PARP16     | -1.3 | 0.0004349 | 0.0029859 | 6.301   | 0.344 | 6.081   | 6.697   | 8.329   | 0.443  | 7.817   | 8.588   |
| 11312 | ENSG00000129484 | PARP2      | -1.1 | 0.0584554 | 0.1427662 | 29.968  | 0.412 | 29.522  | 30.335  | 32.875  | 0.868  | 31.883  | 33.491  |
| 11314 | ENSG00000041880 | PARP3      | -1.5 | 0.0274267 | 0.0804487 | 0.961   | 0.177 | 0.757   | 1.069   | 1.466   | 0.168  | 1.311   | 1.644   |
| 11315 | ENSG00000102699 | PARP4      | 1.2  | 7.744E-07 | 1.546E-05 | 52.689  | 2.340 | 50.605  | 55.221  | 44.993  | 1.476  | 44.110  | 46.696  |
| 11317 | ENSG00000137817 | PARP6      | -1.1 | 0.0683703 | 0.1608742 | 10.656  | 0.143 | 10.501  | 10.782  | 11.842  | 0.426  | 11.361  | 12.173  |
| 11319 | ENSG00000151883 | PARP8      | 1.1  | 0.0223851 | 0.0687989 | 7.592   | 0.583 | 6.934   | 8.046   | 6.942   | 0.418  | 6.486   | 7.305   |
| 11320 | ENSG00000185480 | PARPBP     | 1.1  | 0.0384162 | 0.1036093 | 31.960  | 1.538 | 30.331  | 33.387  | 30.114  | 0.510  | 29.614  | 30.634  |
| 11321 | ENSG00000197702 | PARVA      | 1.3  | 0.0001347 | 0.0011523 | 6.470   | 0.364 | 6.234   | 6.889   | 5.249   | 0.206  | 5.018   | 5.413   |
| 11323 | ENSG00000188677 | PARVB      | 1.2  | 0.0119493 | 0.0420716 | 6.164   | 0.621 | 5.485   | 6.702   | 5.343   | 0.203  | 5.140   | 5.546   |
| 11325 | ENSG00000166889 | PATL1      | 1.1  | 0.0194921 | 0.061736  | 35.404  | 0.373 | 34.984  | 35.697  | 33.296  | 0.903  | 32.291  | 34.037  |
| 11326 | ENSG00000100105 | PATZ1      | -1.1 | 0.0021124 | 0.0105892 | 34.173  | 1.710 | 32.211  | 35.345  | 39.242  | 1.932  | 37.024  | 40.564  |
| 11327 | ENSG00000177425 | PAWR       | 1.3  | 6.78E-09  | 2.661E-07 | 130.288 | 2.772 | 127.879 | 133.318 | 106.482 | 7.859  | 98.906  | 114.595 |
| 11329 | ENSG00000159086 | PAXBP1     | -1.2 | 3.114E-07 | 7.223E-06 | 40.982  | 0.636 | 40.248  | 41.378  | 50.590  | 1.353  | 49.032  | 51.461  |

|       | A               | B          | C    | D         | E         | F       | G      | H       | I       | J       | K      | L       | M       |
|-------|-----------------|------------|------|-----------|-----------|---------|--------|---------|---------|---------|--------|---------|---------|
| 11330 | ENSG00000273344 | PAXIP1-AS1 | -1.1 | 0.1075624 | 0.2248965 | 14.837  | 0.400  | 14.463  | 15.259  | 17.033  | 1.266  | 16.246  | 18.494  |
| 11331 | ENSG00000102390 | PBDC1      | 1.1  | 0.0213287 | 0.0663111 | 70.057  | 3.678  | 65.812  | 72.286  | 63.827  | 5.984  | 60.163  | 70.732  |
| 11333 | ENSG00000108187 | PBLD       | 1.2  | 0.0993772 | 0.2124073 | 2.063   | 0.435  | 1.770   | 2.564   | 1.728   | 0.316  | 1.387   | 2.012   |
| 11334 | ENSG00000185630 | PBX1       | 1.1  | 0.0168834 | 0.0553389 | 32.590  | 1.123  | 31.302  | 33.370  | 31.043  | 1.314  | 29.747  | 32.373  |
| 11336 | ENSG00000204304 | PBX2       | -1.1 | 0.1179732 | 0.2399905 | 97.906  | 6.784  | 90.290  | 103.302 | 105.138 | 5.333  | 99.809  | 110.475 |
| 11338 | ENSG00000167081 | PBX3       | -1.1 | 0.0808042 | 0.1826938 | 22.054  | 1.018  | 21.027  | 23.063  | 24.335  | 1.265  | 23.551  | 25.794  |
| 11339 | ENSG00000163346 | PBXIP1     | 1.1  | 0.0072128 | 0.0281601 | 40.239  | 1.424  | 38.895  | 41.731  | 37.017  | 2.555  | 34.235  | 39.259  |
| 11341 | ENSG00000173599 | PC         | 1.2  | 0.0027791 | 0.0132772 | 7.456   | 0.486  | 6.900   | 7.802   | 6.273   | 0.776  | 5.434   | 6.966   |
| 11342 | ENSG00000228288 | PCAT6      | -1.5 | 9.397E-05 | 0.0008596 | 12.314  | 0.714  | 11.718  | 13.106  | 18.904  | 2.349  | 16.228  | 20.626  |
| 11343 | ENSG00000166228 | PCBD1      | 1.1  | 0.0133202 | 0.0459295 | 44.666  | 1.223  | 43.543  | 45.969  | 40.221  | 1.059  | 39.162  | 41.280  |
| 11344 | ENSG00000132570 | PCBD2      | 1.1  | 0.0478052 | 0.1226978 | 4.628   | 0.338  | 4.244   | 4.882   | 4.138   | 0.205  | 4.013   | 4.375   |
| 11347 | ENSG00000169564 | PCBP1      | -1.2 | 1.165E-07 | 3.112E-06 | 440.141 | 23.664 | 415.261 | 462.365 | 533.329 | 13.099 | 521.806 | 547.575 |
| 11349 | ENSG00000179818 | PCBP1-AS1  | -1.2 | 0.0212334 | 0.0661158 | 1.713   | 0.042  | 1.687   | 1.762   | 2.018   | 0.133  | 1.864   | 2.097   |
| 11351 | ENSG00000197111 | PCBP2      | -1.1 | 1.939E-05 | 0.0002317 | 63.467  | 3.273  | 59.861  | 66.250  | 74.098  | 0.936  | 73.030  | 74.772  |
| 11352 | ENSG00000090097 | PCBP4      | -1.4 | 2.782E-06 | 4.493E-05 | 9.710   | 0.463  | 9.407   | 10.243  | 13.448  | 0.388  | 13.004  | 13.724  |
| 11355 | ENSG00000175198 | PCCA       | -1.1 | 0.0512773 | 0.1294031 | 17.674  | 0.534  | 17.062  | 18.046  | 19.471  | 1.112  | 18.791  | 20.754  |
| 11357 | ENSG00000156453 | PCDH1      | -1.2 | 3.361E-07 | 7.724E-06 | 42.485  | 3.401  | 40.169  | 46.389  | 53.499  | 3.540  | 50.465  | 57.388  |
| 11358 | ENSG00000138650 | PCDH10     | 1.6  | 6.362E-07 | 1.314E-05 | 8.248   | 1.469  | 7.287   | 9.939   | 5.429   | 0.521  | 4.921   | 5.962   |
| 11359 | ENSG00000102290 | PCDH11X    | -1.3 | 1.229E-07 | 3.257E-06 | 9.941   | 0.788  | 9.031   | 10.410  | 13.423  | 0.446  | 13.055  | 13.919  |
| 11360 | ENSG00000099715 | PCDH11Y    | -1.4 | 0.0001674 | 0.0013801 | 1.557   | 0.103  | 1.458   | 1.663   | 2.171   | 0.035  | 2.140   | 2.209   |
| 11361 | ENSG00000189184 | PCDH18     | -1.1 | 0.00705   | 0.0276652 | 44.754  | 1.800  | 43.252  | 46.749  | 50.194  | 3.825  | 46.502  | 54.140  |
| 11362 | ENSG00000165194 | PCDH19     | -1.7 | 0.005208  | 0.0217756 | 0.269   | 0.139  | 0.166   | 0.428   | 0.478   | 0.065  | 0.411   | 0.541   |
| 11364 | ENSG00000249158 | PCDHA11    | 1.3  | 0.0956739 | 0.2068694 | 0.970   | 0.150  | 0.830   | 1.128   | 0.764   | 0.078  | 0.675   | 0.821   |
| 11365 | ENSG00000251664 | PCDHA12    | 1.4  | 0.001915  | 0.0098293 | 3.878   | 0.933  | 3.141   | 4.927   | 2.880   | 0.387  | 2.565   | 3.312   |
| 11366 | ENSG00000239389 | PCDHA13    | 1.4  | 0.0180363 | 0.0582041 | 1.569   | 0.353  | 1.315   | 1.972   | 1.140   | 0.263  | 0.909   | 1.426   |
| 11367 | ENSG00000243232 | PCDHAC2    | 1.3  | 0.0045431 | 0.0196414 | 4.711   | 0.347  | 4.339   | 5.024   | 3.841   | 0.556  | 3.434   | 4.474   |
| 11368 | ENSG00000120327 | PCDHB14    | 1.4  | 0.0011593 | 0.0066243 | 3.042   | 0.159  | 2.860   | 3.152   | 2.238   | 0.264  | 1.997   | 2.520   |
| 11371 | ENSG00000113248 | PCDHB15    | 1.2  | 0.0022322 | 0.011052  | 8.734   | 0.265  | 8.451   | 8.977   | 7.200   | 0.546  | 6.850   | 7.829   |
| 11373 | ENSG00000272674 | PCDHB16    | 1.3  | 0.0619453 | 0.1491572 | 1.792   | 0.304  | 1.484   | 2.092   | 1.430   | 0.201  | 1.206   | 1.592   |
| 11374 | ENSG00000112852 | PCDHB2     | 1.2  | 0.0007989 | 0.0048616 | 16.378  | 0.829  | 15.820  | 17.331  | 13.989  | 0.657  | 13.435  | 14.715  |
| 11375 | ENSG00000177839 | PCDHB9     | 1.7  | 0.0036556 | 0.0165094 | 0.998   | 0.074  | 0.915   | 1.060   | 0.594   | 0.035  | 0.555   | 0.623   |
| 11376 | ENSG00000204956 | PCDHGA1    | 1.6  | 0.0654858 | 0.1556437 | 0.471   | 0.024  | 0.449   | 0.496   | 0.305   | 0.105  | 0.240   | 0.425   |
| 11377 | ENSG00000253873 | PCDHGA11   | 1.2  | 0.0466984 | 0.1205265 | 4.177   | 0.467  | 3.639   | 4.472   | 3.653   | 0.196  | 3.497   | 3.873   |
| 11378 | ENSG00000253159 | PCDHGA12   | -1.4 | 0.1163849 | 0.2376743 | 0.446   | 0.160  | 0.337   | 0.629   | 0.649   | 0.072  | 0.572   | 0.715   |
| 11379 | ENSG00000262576 | PCDHGA4    | 1.6  | 0.0537582 | 0.1342605 | 0.616   | 0.184  | 0.453   | 0.816   | 0.386   | 0.188  | 0.171   | 0.512   |
| 11380 | ENSG00000254221 | PCDHGB1    | 1.3  | 0.0923774 | 0.20191   | 1.105   | 0.283  | 0.794   | 1.346   | 0.858   | 0.181  | 0.670   | 1.030   |
| 11381 | ENSG00000253910 | PCDHGB2    | 1.7  | 0.0007686 | 0.004708  | 1.810   | 0.147  | 1.642   | 1.911   | 1.116   | 0.186  | 0.951   | 1.317   |
| 11382 | ENSG00000253953 | PCDHGB4    | 1.2  | 0.0272889 | 0.0801517 | 2.294   | 0.097  | 2.229   | 2.405   | 1.902   | 0.198  | 1.706   | 2.102   |
| 11384 | ENSG00000253305 | PCDHGB6    | 1.3  | 0.002882  | 0.0136193 | 3.697   | 0.284  | 3.501   | 4.023   | 2.932   | 0.334  | 2.660   | 3.305   |

|       | A               | B          | C    | D         | E         | F       | G     | H       | I       | J       | K      | L       | M       |
|-------|-----------------|------------|------|-----------|-----------|---------|-------|---------|---------|---------|--------|---------|---------|
| 11385 | ENSG00000240184 | PCDHGC3    | 1.2  | 0.0420252 | 0.1110583 | 4.419   | 0.597 | 3.781   | 4.964   | 3.772   | 0.781  | 3.116   | 4.636   |
| 11387 | ENSG00000242419 | PCDHGC4    | -1.4 | 0.0440701 | 0.1153092 | 0.695   | 0.170 | 0.594   | 0.890   | 1.021   | 0.211  | 0.805   | 1.226   |
| 11388 | ENSG00000165494 | PCF11      | 1.1  | 0.0824343 | 0.1857463 | 24.124  | 1.605 | 22.757  | 25.891  | 23.107  | 0.720  | 22.322  | 23.737  |
| 11390 | ENSG00000185619 | PCGF3      | -1.1 | 0.0063505 | 0.0254585 | 29.660  | 0.717 | 29.180  | 30.483  | 33.363  | 1.064  | 32.575  | 34.574  |
| 11391 | ENSG00000100982 | PCIF1      | -1.4 | 1.22E-08  | 4.409E-07 | 24.388  | 0.880 | 23.530  | 25.289  | 33.716  | 1.265  | 32.973  | 35.176  |
| 11392 | ENSG00000100889 | PCK2       | 1.9  | 1.81E-19  | 1.09E-16  | 78.579  | 3.999 | 75.038  | 82.916  | 43.218  | 1.550  | 42.115  | 44.989  |
| 11394 | ENSG00000186472 | PCLO       | 1.2  | 0.0122927 | 0.043021  | 1.851   | 0.299 | 1.537   | 2.132   | 1.558   | 0.069  | 1.501   | 1.634   |
| 11397 | ENSG00000168300 | PCMTD1     | -1.2 | 0.0004241 | 0.0029274 | 19.115  | 0.198 | 18.912  | 19.307  | 22.744  | 0.969  | 21.690  | 23.594  |
| 11398 | ENSG00000160299 | PCNT       | -1.2 | 9.287E-05 | 0.0008518 | 12.585  | 0.065 | 12.511  | 12.633  | 14.940  | 0.304  | 14.599  | 15.184  |
| 11399 | ENSG00000100731 | PCNX1      | -1.1 | 0.0079666 | 0.0305046 | 17.938  | 0.956 | 16.837  | 18.549  | 20.018  | 0.856  | 19.502  | 21.007  |
| 11400 | ENSG00000197136 | PCNX3      | 1.1  | 0.0559094 | 0.1383056 | 13.158  | 1.233 | 11.760  | 14.091  | 12.178  | 1.264  | 11.074  | 13.556  |
| 11402 | ENSG00000126773 | PCNX4      | 1.1  | 0.0089736 | 0.0333488 | 8.390   | 0.258 | 8.131   | 8.646   | 7.824   | 0.359  | 7.550   | 8.230   |
| 11404 | ENSG00000224729 | PCOLCE-AS1 | -1.7 | 1.68E-08  | 5.821E-07 | 6.134   | 0.193 | 5.949   | 6.334   | 10.807  | 0.537  | 10.241  | 11.310  |
| 11407 | ENSG00000175426 | PCSK1      | 1.5  | 0.0010082 | 0.0059124 | 2.820   | 0.514 | 2.253   | 3.257   | 1.947   | 0.209  | 1.756   | 2.170   |
| 11408 | ENSG00000099139 | PCSK5      | 1.1  | 0.0819517 | 0.1849791 | 3.654   | 0.218 | 3.417   | 3.846   | 3.394   | 0.230  | 3.129   | 3.533   |
| 11410 | ENSG00000169174 | PCSK9      | 1.7  | 3.66E-17  | 1.24E-14  | 39.056  | 1.339 | 37.556  | 40.131  | 23.456  | 1.087  | 22.324  | 24.491  |
| 11412 | ENSG00000116005 | PCYOX1     | 1.2  | 5.983E-06 | 8.627E-05 | 49.502  | 1.811 | 47.411  | 50.556  | 43.089  | 1.223  | 41.695  | 43.982  |
| 11413 | ENSG00000161217 | PCYT1A     | 1.2  | 0.0001196 | 0.0010469 | 11.296  | 0.273 | 11.043  | 11.585  | 9.594   | 0.391  | 9.246   | 10.018  |
| 11415 | ENSG00000102230 | PCYT1B     | 1.2  | 5.488E-05 | 0.0005522 | 31.310  | 1.826 | 30.213  | 33.418  | 27.147  | 1.934  | 24.935  | 28.521  |
| 11416 | ENSG00000185813 | PCYT2      | 1.8  | 2.24E-11  | 1.733E-09 | 9.545   | 1.296 | 8.049   | 10.346  | 5.523   | 0.495  | 5.044   | 6.032   |
| 11418 | ENSG00000188389 | PDCD1      | 1.5  | 0.007754  | 0.0299003 | 3.062   | 0.928 | 2.095   | 3.947   | 2.038   | 0.174  | 1.837   | 2.145   |
| 11419 | ENSG00000148843 | PDCD11     | 1.1  | 0.060241  | 0.1461144 | 54.082  | 2.114 | 52.182  | 56.358  | 52.363  | 2.326  | 50.527  | 54.979  |
| 11420 | ENSG00000071994 | PDCD2      | -1.2 | 7.652E-05 | 0.0007254 | 27.777  | 0.667 | 27.273  | 28.533  | 32.795  | 0.196  | 32.676  | 33.022  |
| 11421 | ENSG00000126249 | PDCD2L     | 1.1  | 0.0357055 | 0.0982729 | 29.666  | 2.071 | 27.277  | 30.973  | 26.590  | 2.606  | 23.876  | 29.072  |
| 11422 | ENSG00000136940 | PDCL       | -1.2 | 0.000864  | 0.005191  | 22.655  | 0.474 | 22.253  | 23.177  | 27.232  | 0.851  | 26.688  | 28.212  |
| 11423 | ENSG00000244119 | PDCL3P4    | 1.8  | 1.906E-06 | 3.262E-05 | 18.322  | 0.440 | 18.057  | 18.830  | 10.167  | 1.802  | 9.052   | 12.245  |
| 11424 | ENSG00000184588 | PDE4B      | 1.7  | 0.000622  | 0.0039969 | 0.651   | 0.068 | 0.581   | 0.717   | 0.379   | 0.095  | 0.270   | 0.449   |
| 11426 | ENSG00000105650 | PDE4C      | -1.3 | 0.0033303 | 0.0153058 | 1.333   | 0.124 | 1.196   | 1.436   | 1.801   | 0.143  | 1.638   | 1.906   |
| 11427 | ENSG00000113448 | PDE4D      | 1.9  | 6.31E-06  | 9E-05     | 0.687   | 0.090 | 0.598   | 0.779   | 0.377   | 0.100  | 0.305   | 0.491   |
| 11428 | ENSG00000178104 | PDE4DIP    | -1.1 | 0.0696036 | 0.1631608 | 4.681   | 0.102 | 4.583   | 4.787   | 5.141   | 0.377  | 4.707   | 5.384   |
| 11429 | ENSG00000138735 | PDE5A      | -1.1 | 0.0185088 | 0.0592898 | 12.932  | 0.393 | 12.521  | 13.306  | 14.507  | 0.675  | 13.806  | 15.152  |
| 11430 | ENSG00000156973 | PDE6D      | 1.1  | 0.0325421 | 0.0919452 | 29.864  | 1.825 | 28.667  | 31.964  | 27.549  | 1.717  | 25.737  | 29.153  |
| 11431 | ENSG00000113231 | PDE8B      | 1.4  | 0.0302339 | 0.0868011 | 0.803   | 0.227 | 0.644   | 1.063   | 0.581   | 0.043  | 0.553   | 0.631   |
| 11432 | ENSG00000160191 | PDE9A      | 1.1  | 0.006307  | 0.0253191 | 15.320  | 0.440 | 14.888  | 15.767  | 13.797  | 0.510  | 13.215  | 14.167  |
| 11433 | ENSG00000197461 | PDGFA      | 1.2  | 6.488E-06 | 9.229E-05 | 31.486  | 2.106 | 29.202  | 33.349  | 25.921  | 0.855  | 25.066  | 26.776  |
| 11434 | ENSG00000100311 | PDGFB      | 2.2  | 1.146E-09 | 5.46E-08  | 13.074  | 0.469 | 12.557  | 13.474  | 6.163   | 1.594  | 4.418   | 7.543   |
| 11436 | ENSG00000145431 | PDGFC      | 1.3  | 0.0155147 | 0.0518067 | 2.920   | 0.571 | 2.291   | 3.405   | 2.307   | 0.385  | 1.916   | 2.685   |
| 11437 | ENSG00000113721 | PDGFRB     | 1.2  | 0.0063424 | 0.0254432 | 7.479   | 0.385 | 7.054   | 7.804   | 6.537   | 0.450  | 6.267   | 7.056   |
| 11438 | ENSG00000168291 | PDHB       | 1.1  | 0.018487  | 0.0592517 | 108.187 | 1.407 | 107.330 | 109.810 | 103.536 | 1.628  | 102.071 | 105.289 |
| 11439 | ENSG00000110435 | PDHX       | -1.1 | 0.066817  | 0.1581853 | 34.141  | 0.477 | 33.752  | 34.673  | 37.488  | 2.166  | 35.065  | 39.236  |
| 11440 | ENSG00000167004 | PDIA3      | 1    | 0.0820322 | 0.1850867 | 322.309 | 8.497 | 316.014 | 331.974 | 315.795 | 1.210  | 314.684 | 317.085 |
| 11442 | ENSG00000180867 | PDIA3P1    | 1.1  | 0.0866904 | 0.1926921 | 306.007 | 8.328 | 296.523 | 312.129 | 296.933 | 14.311 | 280.417 | 305.646 |

|       | A               | B      | C    | D         | E         | F       | G      | H       | I       | J       | K      | L       | M       |
|-------|-----------------|--------|------|-----------|-----------|---------|--------|---------|---------|---------|--------|---------|---------|
| 11445 | ENSG00000155660 | PDIA4  | 1.1  | 1.391E-05 | 0.0001762 | 289.774 | 15.159 | 278.921 | 307.094 | 259.546 | 10.582 | 251.834 | 271.610 |
| 11446 | ENSG00000065485 | PDIA5  | -1.2 | 0.0022088 | 0.0109619 | 17.778  | 0.308  | 17.512  | 18.115  | 20.973  | 1.450  | 19.576  | 22.470  |
| 11447 | ENSG00000143870 | PDIA6  | 1    | 0.08224   | 0.185432  | 345.931 | 8.249  | 339.276 | 355.161 | 339.454 | 6.386  | 334.380 | 346.625 |
| 11450 | ENSG00000152256 | PDK1   | -1.2 | 0.0149004 | 0.0501912 | 4.857   | 0.175  | 4.685   | 5.035   | 5.716   | 0.997  | 5.091   | 6.866   |
| 11451 | ENSG00000005882 | PDK2   | -1.1 | 0.0934081 | 0.2033358 | 8.569   | 0.805  | 7.979   | 9.487   | 9.722   | 1.541  | 8.769   | 11.500  |
| 11452 | ENSG00000067992 | PDK3   | -1.3 | 9.879E-05 | 0.0008954 | 24.348  | 2.407  | 21.873  | 26.680  | 31.176  | 1.412  | 30.157  | 32.789  |
| 11453 | ENSG00000107438 | PDLIM1 | -1.2 | 1.749E-08 | 6.025E-07 | 159.198 | 2.220  | 157.866 | 161.761 | 200.063 | 3.468  | 196.708 | 203.633 |
| 11454 | ENSG00000120913 | PDLIM2 | 1.2  | 0.001265  | 0.0070892 | 3.846   | 0.307  | 3.635   | 4.198   | 3.226   | 0.159  | 3.046   | 3.346   |
| 11455 | ENSG00000131435 | PDLIM4 | 1.3  | 0.0041473 | 0.0182903 | 7.320   | 1.273  | 5.967   | 8.495   | 5.761   | 0.277  | 5.449   | 5.978   |
| 11457 | ENSG00000163110 | PDLIM5 | 1.2  | 6.711E-06 | 9.498E-05 | 16.200  | 1.524  | 14.458  | 17.290  | 13.543  | 0.452  | 13.051  | 13.940  |
| 11460 | ENSG00000164951 | PDP1   | 2.8  | 3.73E-19  | 2.18E-16  | 44.808  | 5.696  | 38.529  | 49.645  | 16.360  | 0.437  | 16.048  | 16.860  |
| 11461 | ENSG00000140992 | PDPK1  | -1.1 | 0.0235372 | 0.0715979 | 8.483   | 0.300  | 8.154   | 8.743   | 9.591   | 0.646  | 8.855   | 10.068  |
| 11462 | ENSG00000162493 | PDPN   | -1.2 | 9.01E-05  | 0.00083   | 67.920  | 6.221  | 61.017  | 73.093  | 80.551  | 1.540  | 78.874  | 81.902  |
| 11465 | ENSG00000083642 | PDS5B  | -1.2 | 1.832E-06 | 3.152E-05 | 11.869  | 0.344  | 11.473  | 12.091  | 14.804  | 0.728  | 14.047  | 15.499  |
| 11466 | ENSG00000164494 | PDSS2  | -1.2 | 0.0004359 | 0.0029907 | 14.489  | 0.439  | 14.036  | 14.914  | 18.045  | 0.359  | 17.761  | 18.449  |
| 11467 | ENSG00000160209 | PDXK   | 1.1  | 0.0246495 | 0.0741351 | 18.191  | 0.296  | 17.978  | 18.529  | 17.205  | 0.890  | 16.301  | 18.079  |
| 11473 | ENSG00000241360 | PDXP   | -1.3 | 0.1152157 | 0.2357705 | 1.682   | 0.187  | 1.541   | 1.894   | 2.284   | 0.922  | 1.621   | 3.337   |
| 11474 | ENSG00000067840 | PDZD4  | 1    | 0.1153792 | 0.2359908 | 79.793  | 3.917  | 76.882  | 84.247  | 77.746  | 2.953  | 74.390  | 79.947  |
| 11475 | ENSG00000186862 | PDZD7  | -1.3 | 0.0673475 | 0.1591798 | 0.806   | 0.138  | 0.717   | 0.964   | 1.081   | 0.202  | 0.887   | 1.290   |
| 11476 | ENSG00000165650 | PDZD8  | -1.1 | 0.0012823 | 0.0071599 | 18.391  | 0.715  | 17.566  | 18.827  | 21.209  | 1.639  | 19.520  | 22.793  |
| 11477 | ENSG00000121440 | PDZRN3 | -1.5 | 7.57E-07  | 1.521E-05 | 4.851   | 0.425  | 4.589   | 5.342   | 7.211   | 0.852  | 6.251   | 7.876   |
| 11479 | ENSG00000162734 | PEA15  | 1.4  | 1.98E-13  | 2.52E-11  | 103.006 | 4.946  | 97.377  | 106.656 | 72.623  | 1.146  | 71.451  | 73.741  |
| 11480 | ENSG00000173517 | PEAK1  | -1.2 | 7.866E-06 | 0.0001089 | 7.794   | 0.311  | 7.534   | 8.138   | 9.505   | 0.577  | 9.103   | 10.166  |
| 11481 | ENSG00000187800 | PEAR1  | 1.4  | 0.0262717 | 0.0778438 | 1.000   | 0.046  | 0.961   | 1.051   | 0.715   | 0.175  | 0.562   | 0.905   |
| 11483 | ENSG00000115425 | PECR   | 1.1  | 0.094757  | 0.2056493 | 11.185  | 0.695  | 10.488  | 11.878  | 10.313  | 0.629  | 9.732   | 10.981  |
| 11484 | ENSG00000242265 | PEG10  | 1.3  | 1.22E-11  | 9.954E-10 | 74.498  | 4.687  | 69.463  | 78.736  | 57.651  | 0.499  | 57.191  | 58.182  |
| 11487 | ENSG00000282164 | PEG13  | 1.5  | 0.0053709 | 0.0223135 | 1.857   | 0.470  | 1.355   | 2.287   | 1.298   | 0.163  | 1.151   | 1.472   |
| 11491 | ENSG00000139946 | PELI2  | -1.1 | 0.0389065 | 0.1046147 | 15.975  | 0.547  | 15.485  | 16.564  | 18.001  | 1.745  | 16.104  | 19.538  |
| 11492 | ENSG00000174516 | PELI3  | 1.4  | 0.0033249 | 0.0153016 | 3.168   | 0.384  | 2.732   | 3.460   | 2.318   | 0.439  | 1.870   | 2.749   |
| 11496 | ENSG00000141456 | PELP1  | -1.1 | 0.004015  | 0.0178228 | 41.151  | 1.689  | 39.397  | 42.768  | 46.592  | 4.100  | 43.974  | 51.317  |
| 11497 | ENSG00000124299 | PEPD   | 1.3  | 9.358E-07 | 1.807E-05 | 38.767  | 1.867  | 36.700  | 40.330  | 31.716  | 1.449  | 30.055  | 32.719  |
| 11498 | ENSG00000049246 | PER3   | 1.2  | 0.0061225 | 0.0247511 | 9.141   | 1.588  | 7.310   | 10.142  | 7.872   | 0.378  | 7.604   | 8.304   |
| 11499 | ENSG00000112378 | PERP   | 1.3  | 1.207E-08 | 4.381E-07 | 69.630  | 3.240  | 66.088  | 72.446  | 56.306  | 2.979  | 54.034  | 59.680  |
| 11500 | ENSG00000127980 | PEX1   | -1.1 | 0.021149  | 0.0659222 | 26.211  | 0.618  | 25.663  | 26.880  | 28.914  | 0.868  | 28.373  | 29.916  |
| 11501 | ENSG00000157911 | PEX10  | 1.2  | 0.0052049 | 0.0217737 | 17.487  | 1.061  | 16.639  | 18.677  | 15.358  | 1.432  | 13.742  | 16.470  |
| 11502 | ENSG00000108733 | PEX12  | -1.2 | 0.0580273 | 0.1421516 | 7.560   | 0.599  | 6.868   | 7.915   | 9.024   | 0.914  | 8.091   | 9.916   |
| 11505 | ENSG00000164751 | PEX2   | -1.1 | 0.0956585 | 0.2068626 | 19.564  | 1.258  | 18.285  | 20.799  | 21.637  | 0.705  | 20.836  | 22.167  |
| 11508 | ENSG00000215193 | PEX26  | -1.1 | 0.0012171 | 0.0068756 | 5.830   | 0.226  | 5.664   | 6.088   | 6.790   | 0.316  | 6.506   | 7.131   |
| 11509 | ENSG00000124587 | PEX6   | -1.1 | 0.035826  | 0.0985565 | 14.438  | 0.709  | 13.798  | 15.201  | 16.488  | 0.643  | 15.835  | 17.119  |
| 11511 | ENSG00000112357 | PEX7   | 1.2  | 0.0333986 | 0.0936921 | 17.945  | 0.987  | 17.299  | 19.081  | 15.882  | 1.235  | 15.064  | 17.302  |
| 11514 | ENSG00000178921 | PFAS   | 1.2  | 1.248E-06 | 2.28E-05  | 39.779  | 1.494  | 38.196  | 41.166  | 32.690  | 3.461  | 28.859  | 35.591  |
| 11515 | ENSG00000143256 | PFDN2  | -1.2 | 0.0007966 | 0.0048526 | 163.663 | 2.880  | 160.833 | 166.590 | 194.744 | 18.480 | 178.239 | 214.710 |
| 11519 | ENSG00000123836 | PFKFB2 | 1.3  | 3.746E-09 | 1.596E-07 | 18.680  | 0.724  | 18.027  | 19.458  | 14.243  | 1.020  | 13.570  | 15.417  |



|       | A               | B       | C    | D         | E         | F       | G      | H       | I       | J       | K      | L       | M       |
|-------|-----------------|---------|------|-----------|-----------|---------|--------|---------|---------|---------|--------|---------|---------|
| 11520 | ENSG00000170525 | PFKFB3  | 1.1  | 0.1169427 | 0.2384966 | 7.914   | 0.183  | 7.703   | 8.023   | 7.492   | 0.273  | 7.206   | 7.751   |
| 11521 | ENSG00000141959 | PFKL    | -1.1 | 0.0531464 | 0.1330667 | 26.604  | 1.897  | 24.414  | 27.757  | 29.358  | 1.981  | 27.222  | 31.136  |
| 11524 | ENSG00000067057 | PFKP    | 1.1  | 0.0046141 | 0.0198792 | 68.770  | 1.095  | 67.699  | 69.887  | 64.316  | 2.310  | 62.324  | 66.848  |
| 11525 | ENSG00000108518 | PFN1    | 1    | 0.1143867 | 0.2345765 | 745.065 | 16.252 | 726.455 | 756.466 | 730.160 | 40.215 | 704.748 | 776.524 |
| 11526 | ENSG00000070087 | PFN2    | 1.1  | 0.0099653 | 0.0363395 | 193.224 | 10.224 | 182.324 | 202.602 | 182.766 | 10.158 | 176.494 | 194.485 |
| 11528 | ENSG00000171314 | PGAM1   | -1.2 | 2.771E-06 | 4.484E-05 | 273.364 | 4.819  | 269.081 | 278.582 | 327.259 | 22.780 | 307.384 | 352.119 |
| 11531 | ENSG00000257150 | PGAM1P5 | -1.4 | 0.0946653 | 0.2055293 | 1.147   | 0.153  | 1.007   | 1.310   | 1.589   | 0.181  | 1.410   | 1.771   |
| 11532 | ENSG00000226784 | PGAM4   | -1.1 | 0.0167692 | 0.0550712 | 65.832  | 2.713  | 63.047  | 68.467  | 76.436  | 8.379  | 67.739  | 84.454  |
| 11534 | ENSG00000197121 | PGAP1   | 1.1  | 0.0014991 | 0.0080877 | 15.243  | 0.778  | 14.664  | 16.127  | 13.699  | 0.400  | 13.286  | 14.085  |
| 11535 | ENSG00000148985 | PGAP2   | -1.1 | 0.0123198 | 0.0430773 | 15.252  | 0.118  | 15.161  | 15.385  | 17.688  | 1.135  | 16.508  | 18.771  |
| 11536 | ENSG00000161395 | PGAP3   | 1.2  | 0.0009863 | 0.0058002 | 10.281  | 0.568  | 9.698   | 10.832  | 8.467   | 0.091  | 8.369   | 8.550   |
| 11537 | ENSG00000177614 | PGBD5   | 1.2  | 0.0022099 | 0.0109637 | 5.557   | 0.449  | 5.042   | 5.865   | 4.809   | 0.137  | 4.680   | 4.953   |
| 11538 | ENSG00000142657 | PGD     | 1.1  | 0.0091489 | 0.0338591 | 287.605 | 5.521  | 282.800 | 293.636 | 274.933 | 7.666  | 266.957 | 282.246 |
| 11539 | ENSG00000142102 | PGGHG   | -1.5 | 1.066E-09 | 5.168E-08 | 15.457  | 1.325  | 14.587  | 16.982  | 23.938  | 1.756  | 22.209  | 25.720  |
| 11540 | ENSG00000164219 | PGGT1B  | -1.1 | 0.0801531 | 0.1815493 | 12.464  | 0.669  | 11.925  | 13.213  | 13.696  | 0.637  | 13.240  | 14.424  |
| 11547 | ENSG00000102144 | PGK1    | -1.4 | 2.85E-05  | 0.0003199 | 183.788 | 1.621  | 181.919 | 184.803 | 257.316 | 32.354 | 227.740 | 291.871 |
| 11549 | ENSG00000213290 | PGK1P2  | -1.3 | 0.1091426 | 0.2271912 | 5.306   | 0.681  | 4.663   | 6.020   | 6.952   | 1.092  | 5.774   | 7.931   |
| 11551 | ENSG00000169299 | PGM2    | 1.1  | 0.0051023 | 0.0214718 | 30.605  | 0.371  | 30.215  | 30.952  | 27.988  | 1.032  | 26.988  | 29.050  |
| 11552 | ENSG00000165434 | PGM2L1  | -1.1 | 0.0706324 | 0.1648868 | 12.387  | 0.452  | 11.909  | 12.806  | 13.728  | 1.436  | 12.096  | 14.797  |
| 11554 | ENSG00000013375 | PGM3    | -1.1 | 0.0017384 | 0.009128  | 35.252  | 0.361  | 34.843  | 35.525  | 40.095  | 2.330  | 37.506  | 42.023  |
| 11555 | ENSG00000130517 | PGPEP1  | 1.4  | 8.177E-10 | 4.116E-08 | 14.136  | 0.413  | 13.674  | 14.470  | 10.083  | 0.597  | 9.396   | 10.475  |
| 11557 | ENSG00000101856 | PGRMC1  | 1.2  | 3.97E-09  | 1.665E-07 | 405.940 | 4.973  | 401.849 | 411.475 | 340.715 | 15.366 | 324.642 | 355.260 |
| 11559 | ENSG00000112137 | PHACTR1 | -1.2 | 0.033739  | 0.0943498 | 1.914   | 0.241  | 1.714   | 2.182   | 2.324   | 0.012  | 2.310   | 2.332   |
| 11561 | ENSG00000164902 | PHAX    | -1.1 | 0.0049811 | 0.0210823 | 26.906  | 1.347  | 25.354  | 27.776  | 30.843  | 0.627  | 30.128  | 31.299  |
| 11563 | ENSG00000111752 | PHC1    | -1.2 | 1.067E-08 | 3.956E-07 | 222.432 | 13.281 | 211.716 | 237.290 | 275.915 | 11.021 | 265.820 | 287.673 |
| 11564 | ENSG00000179899 | PHC1P1  | -1.2 | 2.034E-07 | 5.036E-06 | 420.596 | 18.015 | 404.832 | 440.233 | 505.020 | 19.098 | 486.267 | 524.447 |
| 11567 | ENSG00000130024 | PHF10   | -1.1 | 0.0133459 | 0.0460007 | 31.680  | 0.847  | 31.148  | 32.656  | 35.383  | 0.500  | 34.931  | 35.920  |
| 11568 | ENSG00000136147 | PHF11   | 1.1  | 0.1121167 | 0.2315574 | 4.671   | 0.931  | 3.904   | 5.707   | 4.174   | 0.246  | 3.896   | 4.363   |
| 11572 | ENSG00000109118 | PHF12   | -1.1 | 0.0189335 | 0.0603965 | 9.668   | 0.059  | 9.626   | 9.736   | 10.844  | 0.593  | 10.237  | 11.423  |
| 11573 | ENSG00000116273 | PHF13   | 1.1  | 0.0865968 | 0.1925601 | 43.283  | 0.786  | 42.797  | 44.189  | 41.553  | 2.607  | 39.670  | 44.528  |
| 11574 | ENSG00000106443 | PHF14   | -1.1 | 0.113509  | 0.2333205 | 25.942  | 0.756  | 25.119  | 26.608  | 27.961  | 1.422  | 26.476  | 29.311  |
| 11576 | ENSG00000119403 | PHF19   | 1.2  | 0.0091031 | 0.0337339 | 9.716   | 0.815  | 8.903   | 10.532  | 8.506   | 0.344  | 8.257   | 8.898   |
| 11577 | ENSG00000025293 | PHF20   | -1   | 0.1177748 | 0.2397022 | 39.168  | 1.553  | 37.642  | 40.746  | 42.016  | 1.199  | 40.728  | 43.100  |
| 11578 | ENSG00000129292 | PHF20L1 | 1.1  | 0.002837  | 0.0134517 | 6.209   | 0.193  | 5.990   | 6.352   | 5.612   | 0.327  | 5.390   | 5.987   |
| 11579 | ENSG00000040633 | PHF23   | 1.1  | 0.0868553 | 0.1929826 | 31.385  | 0.333  | 31.089  | 31.746  | 29.678  | 2.130  | 28.043  | 32.087  |
| 11580 | ENSG00000122733 | PHF24   | 1.6  | 0.004044  | 0.0179187 | 1.249   | 0.356  | 0.838   | 1.461   | 0.787   | 0.138  | 0.641   | 0.915   |
| 11581 | ENSG00000100410 | PHF5A   | -1.1 | 0.0413268 | 0.1096237 | 125.415 | 3.854  | 121.123 | 128.576 | 137.634 | 1.381  | 136.327 | 139.078 |
| 11582 | ENSG00000156531 | PHF6    | -1.1 | 0.0170328 | 0.0556669 | 48.868  | 0.604  | 48.343  | 49.528  | 53.493  | 1.093  | 52.835  | 54.755  |
| 11583 | ENSG00000010318 | PHF7    | -1.1 | 0.0745871 | 0.1717484 | 10.545  | 1.305  | 9.039   | 11.328  | 12.186  | 0.370  | 11.762  | 12.441  |
| 11584 | ENSG00000172943 | PHF8    | -1.1 | 0.0501231 | 0.1271725 | 13.484  | 0.444  | 13.004  | 13.881  | 14.963  | 0.818  | 14.040  | 15.597  |
| 11585 | ENSG00000092621 | PHGDH   | 1.2  | 2.996E-06 | 4.773E-05 | 277.923 | 16.328 | 259.232 | 289.411 | 244.351 | 10.939 | 235.408 | 256.548 |
| 11586 | ENSG00000067177 | PHKA1   | 1.3  | 6.901E-06 | 9.703E-05 | 12.520  | 0.406  | 12.250  | 12.986  | 9.676   | 1.230  | 8.266   | 10.529  |
| 11587 | ENSG00000232882 | PHKA1P1 | 1.3  | 0.0672414 | 0.1590566 | 13.364  | 3.424  | 9.516   | 16.074  | 10.511  | 2.088  | 8.197   | 12.254  |

|       | A               | B          | C    | D         | E         | F      | G     | H      | I      | J      | K     | L      | M      |
|-------|-----------------|------------|------|-----------|-----------|--------|-------|--------|--------|--------|-------|--------|--------|
| 11589 | ENSG00000044446 | PHKA2      | 1.1  | 0.0836286 | 0.1878367 | 18.272 | 0.663 | 17.775 | 19.025 | 17.537 | 0.549 | 17.190 | 18.171 |
| 11591 | ENSG00000102893 | PHKB       | 1.2  | 8.19E-05  | 0.000767  | 15.671 | 0.712 | 14.849 | 16.109 | 13.551 | 0.916 | 12.493 | 14.089 |
| 11593 | ENSG00000156873 | PHKG2      | -1.1 | 0.0626603 | 0.1506643 | 5.457  | 0.263 | 5.178  | 5.702  | 6.179  | 0.164 | 6.023  | 6.349  |
| 11595 | ENSG00000139289 | PHLDA1     | 1.2  | 0.0007562 | 0.0046506 | 39.717 | 2.870 | 37.075 | 42.771 | 32.601 | 4.363 | 27.580 | 35.470 |
| 11596 | ENSG00000181649 | PHLDA2     | 2.7  | 5.77E-10  | 3.004E-08 | 16.744 | 3.525 | 14.040 | 20.730 | 6.353  | 0.715 | 5.529  | 6.815  |
| 11598 | ENSG00000176531 | PHLDB3     | -1.4 | 0.0007978 | 0.004857  | 2.223  | 0.016 | 2.207  | 2.238  | 3.291  | 0.543 | 2.763  | 3.847  |
| 11599 | ENSG00000081913 | PHLPP1     | -1.1 | 0.1103098 | 0.2289165 | 25.386 | 0.681 | 24.984 | 26.173 | 27.331 | 1.091 | 26.178 | 28.348 |
| 11600 | ENSG00000070047 | PHRF1      | -1.2 | 0.0001201 | 0.0010496 | 19.682 | 1.010 | 18.852 | 20.807 | 23.762 | 1.392 | 22.182 | 24.806 |
| 11601 | ENSG00000116793 | PHTF1      | 1.4  | 6.887E-10 | 3.54E-08  | 14.190 | 0.860 | 13.506 | 15.156 | 9.998  | 0.740 | 9.147  | 10.492 |
| 11603 | ENSG00000006576 | PHTF2      | -1.2 | 2.57E-05  | 0.0002933 | 11.814 | 0.556 | 11.415 | 12.449 | 14.682 | 0.975 | 13.687 | 15.635 |
| 11604 | ENSG00000107537 | PHYH       | 1.1  | 0.0011875 | 0.0067475 | 41.518 | 0.279 | 41.267 | 41.818 | 37.396 | 0.501 | 36.823 | 37.747 |
| 11606 | ENSG00000175287 | PHYHD1     | 1.3  | 0.0002062 | 0.0016303 | 11.060 | 0.162 | 10.937 | 11.244 | 8.539  | 1.005 | 7.385  | 9.228  |
| 11607 | ENSG00000168490 | PHYHIP     | -1.3 | 0.0170609 | 0.0557371 | 4.404  | 0.457 | 4.072  | 4.925  | 5.646  | 0.956 | 4.544  | 6.243  |
| 11608 | ENSG00000175309 | PHYKPL     | -1.1 | 0.0769299 | 0.1758977 | 5.212  | 0.207 | 5.078  | 5.451  | 5.884  | 0.053 | 5.822  | 5.919  |
| 11609 | ENSG00000137558 | PI15       | -1.3 | 0.0353947 | 0.0977197 | 1.731  | 0.273 | 1.416  | 1.898  | 2.219  | 0.173 | 2.062  | 2.404  |
| 11610 | ENSG00000155252 | PI4K2A     | 1.1  | 0.0084159 | 0.0317579 | 17.350 | 0.769 | 16.636 | 18.163 | 15.469 | 0.715 | 14.829 | 16.241 |
| 11611 | ENSG00000241973 | PI4KA      | 1.3  | 7.871E-07 | 1.561E-05 | 12.673 | 0.476 | 12.134 | 13.037 | 10.133 | 0.719 | 9.623  | 10.955 |
| 11612 | ENSG00000274602 | PI4KAP1    | -1.1 | 0.0559342 | 0.1383265 | 14.333 | 0.899 | 13.429 | 15.228 | 16.108 | 1.171 | 14.996 | 17.331 |
| 11613 | ENSG00000078043 | PIAS2      | 1.1  | 0.1003872 | 0.2137811 | 10.662 | 0.125 | 10.580 | 10.806 | 10.269 | 0.488 | 9.923  | 10.826 |
| 11614 | ENSG00000105229 | PIAS4      | -1.1 | 0.0411125 | 0.1091803 | 20.140 | 1.406 | 18.559 | 21.249 | 22.839 | 2.285 | 20.488 | 25.051 |
| 11617 | ENSG00000073921 | PICALM     | 1.2  | 1.393E-05 | 0.0001762 | 57.581 | 1.686 | 56.473 | 59.521 | 50.893 | 2.337 | 48.802 | 53.416 |
| 11618 | ENSG00000153823 | PID1       | 1.5  | 0.001419  | 0.0077367 | 2.716  | 0.188 | 2.502  | 2.855  | 1.860  | 0.282 | 1.687  | 2.185  |
| 11620 | ENSG00000177595 | PIDD1      | -1.1 | 0.0219725 | 0.0678389 | 14.738 | 1.234 | 13.694 | 16.100 | 16.909 | 1.702 | 14.950 | 18.028 |
| 11626 | ENSG00000103335 | PIEZO1     | 1.2  | 2.733E-05 | 0.0003086 | 14.398 | 0.918 | 13.425 | 15.248 | 11.807 | 0.863 | 10.854 | 12.535 |
| 11628 | ENSG00000140451 | PIF1       | -1.2 | 2.874E-06 | 4.607E-05 | 51.891 | 4.212 | 49.056 | 56.730 | 65.131 | 4.827 | 59.571 | 68.257 |
| 11632 | ENSG00000173947 | PIFO       | 1.2  | 0.0003107 | 0.0022723 | 12.455 | 0.508 | 12.063 | 13.028 | 10.294 | 0.429 | 9.874  | 10.732 |
| 11633 | ENSG00000174227 | PIGG       | -1.3 | 2.263E-06 | 3.763E-05 | 9.255  | 0.711 | 8.820  | 10.075 | 11.851 | 0.503 | 11.418 | 12.403 |
| 11636 | ENSG00000142892 | PIGK       | 1.1  | 0.0061822 | 0.0249424 | 21.977 | 1.069 | 21.037 | 23.139 | 19.967 | 0.502 | 19.493 | 20.494 |
| 11637 | ENSG00000108474 | PIGL       | -1.2 | 0.0010777 | 0.0062505 | 9.070  | 0.093 | 8.970  | 9.153  | 11.120 | 0.270 | 10.838 | 11.375 |
| 11640 | ENSG00000197563 | PIGN       | 1.1  | 0.002057  | 0.0103725 | 5.909  | 0.294 | 5.569  | 6.080  | 5.309  | 0.071 | 5.227  | 5.353  |
| 11641 | ENSG00000185808 | PIGP       | 1.1  | 0.1132116 | 0.2330228 | 3.795  | 0.288 | 3.578  | 4.121  | 3.470  | 0.133 | 3.391  | 3.623  |
| 11642 | ENSG00000007541 | PIGQ       | -1.1 | 0.0571738 | 0.1404882 | 4.790  | 0.562 | 4.411  | 5.436  | 5.541  | 0.402 | 5.089  | 5.855  |
| 11643 | ENSG00000087111 | PIGS       | 1.1  | 0.0482003 | 0.1234235 | 16.675 | 1.371 | 15.405 | 18.128 | 15.610 | 0.818 | 14.850 | 16.475 |
| 11645 | ENSG00000101464 | PIGU       | -1.2 | 0.000203  | 0.0016147 | 26.475 | 0.084 | 26.382 | 26.544 | 32.807 | 1.950 | 31.462 | 35.043 |
| 11647 | ENSG00000060642 | PIGV       | -1.1 | 0.0246256 | 0.0740959 | 12.836 | 0.919 | 12.136 | 13.876 | 14.951 | 0.090 | 14.853 | 15.029 |
| 11649 | ENSG00000163964 | PIGX       | 1.3  | 4.875E-06 | 7.278E-05 | 13.880 | 0.836 | 13.358 | 14.844 | 10.569 | 0.355 | 10.323 | 10.975 |
| 11650 | ENSG00000011405 | PIK3C2A    | 1    | 0.1002144 | 0.2135648 | 59.782 | 1.367 | 58.451 | 61.182 | 58.221 | 3.100 | 55.614 | 61.649 |
| 11652 | ENSG00000078142 | PIK3C3     | 1.1  | 0.0377477 | 0.1022956 | 8.303  | 0.390 | 7.921  | 8.700  | 7.822  | 0.343 | 7.522  | 8.195  |
| 11653 | ENSG00000051382 | PIK3CB     | -1.1 | 0.0631724 | 0.1516245 | 25.534 | 0.700 | 24.730 | 26.012 | 28.031 | 2.448 | 26.035 | 30.762 |
| 11654 | ENSG00000231789 | PIK3CD-AS2 | -1.3 | 0.0177384 | 0.0573741 | 10.729 | 0.775 | 10.070 | 11.582 | 14.127 | 1.659 | 12.825 | 15.996 |
| 11655 | ENSG00000145675 | PIK3R1     | -1.2 | 0.0030908 | 0.0144564 | 2.935  | 0.091 | 2.852  | 3.032  | 3.610  | 0.218 | 3.428  | 3.851  |
| 11656 | ENSG00000141506 | PIK3R5     | -1.2 | 0.0692362 | 0.1625023 | 2.532  | 0.131 | 2.422  | 2.677  | 3.006  | 0.328 | 2.752  | 3.376  |

|       | A               | B          | C    | D         | E         | F       | G     | H       | I       | J       | K      | L       | M       |
|-------|-----------------|------------|------|-----------|-----------|---------|-------|---------|---------|---------|--------|---------|---------|
| 11657 | ENSG00000115020 | PIKFYVE    | 1.1  | 0.0014714 | 0.0079633 | 31.318  | 0.231 | 31.153  | 31.582  | 29.049  | 0.784  | 28.151  | 29.599  |
| 11660 | ENSG00000121716 | PILRB      | -1.2 | 0.031655  | 0.0900708 | 3.507   | 0.662 | 2.997   | 4.255   | 4.296   | 0.261  | 4.015   | 4.531   |
| 11663 | ENSG00000137193 | PIM1       | 1.4  | 3.60E-13  | 4.26E-11  | 154.817 | 6.986 | 149.033 | 162.578 | 111.439 | 6.091  | 104.594 | 116.262 |
| 11665 | ENSG00000102096 | PIM2       | -1.1 | 0.0167433 | 0.054997  | 107.307 | 3.717 | 104.918 | 111.590 | 118.431 | 6.206  | 112.487 | 124.870 |
| 11666 | ENSG00000129195 | PIMREG     | -1.1 | 0.0792615 | 0.1801573 | 91.513  | 3.868 | 87.054  | 93.966  | 99.130  | 1.058  | 97.927  | 99.917  |
| 11668 | ENSG00000127445 | PIN1       | -1.1 | 0.0888056 | 0.196127  | 21.355  | 1.251 | 19.919  | 22.209  | 23.437  | 1.035  | 22.792  | 24.631  |
| 11669 | ENSG00000102309 | PIN4       | -1.1 | 0.0321987 | 0.0911669 | 18.930  | 1.109 | 17.686  | 19.816  | 21.401  | 1.409  | 19.940  | 22.752  |
| 11670 | ENSG00000158828 | PINK1      | 1.2  | 0.0048395 | 0.0206432 | 21.516  | 1.880 | 19.417  | 23.044  | 19.011  | 1.212  | 18.014  | 20.360  |
| 11672 | ENSG00000234465 | PINLYP     | -1.4 | 0.0033464 | 0.0153674 | 3.042   | 0.352 | 2.754   | 3.435   | 4.205   | 0.647  | 3.785   | 4.950   |
| 11673 | ENSG00000150867 | PIP4K2A    | -1.1 | 0.0616192 | 0.1485268 | 20.070  | 0.756 | 19.542  | 20.936  | 22.138  | 1.365  | 21.091  | 23.682  |
| 11674 | ENSG00000276293 | PIP4K2B    | 1.1  | 0.1174733 | 0.2393189 | 51.190  | 1.935 | 49.383  | 53.232  | 49.783  | 2.820  | 46.678  | 52.184  |
| 11676 | ENSG00000166908 | PIP4K2C    | 1.3  | 1.008E-05 | 0.0001343 | 29.971  | 1.868 | 27.954  | 31.641  | 24.352  | 1.522  | 22.596  | 25.268  |
| 11677 | ENSG00000143398 | PIP5K1A    | -1.1 | 0.0067517 | 0.0267241 | 54.602  | 0.888 | 53.661  | 55.425  | 60.660  | 3.039  | 57.523  | 63.590  |
| 11678 | ENSG00000107242 | PIP5K1B    | 1.8  | 4.126E-07 | 9.183E-06 | 3.806   | 0.220 | 3.665   | 4.059   | 2.149   | 0.280  | 1.895   | 2.449   |
| 11679 | ENSG00000186111 | PIP5K1C    | -1.1 | 0.098862  | 0.2116255 | 14.075  | 0.514 | 13.634  | 14.640  | 15.538  | 0.596  | 15.033  | 16.195  |
| 11680 | ENSG00000167103 | PIP5K1L    | 1.2  | 0.0124452 | 0.0434169 | 6.266   | 0.242 | 6.014   | 6.496   | 5.244   | 0.369  | 4.974   | 5.664   |
| 11682 | ENSG00000241878 | PISD       | 1.2  | 0.0008328 | 0.0050361 | 23.933  | 0.975 | 22.815  | 24.604  | 21.244  | 0.771  | 20.552  | 22.075  |
| 11683 | ENSG00000174238 | PITPNA     | 1.2  | 3.49E-05  | 0.0003785 | 43.591  | 1.595 | 42.572  | 45.429  | 38.173  | 1.417  | 36.663  | 39.474  |
| 11685 | ENSG00000236618 | PITPNA-AS1 | -1.1 | 0.110701  | 0.229503  | 42.712  | 4.074 | 38.483  | 46.612  | 49.267  | 4.732  | 43.861  | 52.653  |
| 11686 | ENSG00000154217 | PITPNC1    | -1.1 | 0.0537917 | 0.1343243 | 10.381  | 0.574 | 9.882   | 11.009  | 11.586  | 0.978  | 10.487  | 12.362  |
| 11687 | ENSG00000090975 | PITPNM2    | 1.3  | 0.0431205 | 0.1132624 | 0.938   | 0.138 | 0.806   | 1.081   | 0.736   | 0.191  | 0.576   | 0.947   |
| 11688 | ENSG00000091622 | PITPNM3    | 1.2  | 0.0017759 | 0.0092589 | 5.232   | 0.579 | 4.579   | 5.682   | 4.380   | 0.251  | 4.090   | 4.541   |
| 11690 | ENSG00000107959 | PITRM1     | 1.2  | 0.000997  | 0.0058548 | 17.472  | 0.776 | 16.779  | 18.311  | 15.484  | 0.193  | 15.261  | 15.599  |
| 11692 | ENSG00000181191 | PJA1       | 1.1  | 0.0017602 | 0.0092137 | 47.308  | 3.330 | 43.957  | 50.618  | 42.528  | 2.011  | 41.195  | 44.841  |
| 11693 | ENSG00000198961 | PJA2       | -1.1 | 0.0002245 | 0.0017516 | 74.527  | 0.574 | 73.879  | 74.969  | 85.641  | 3.305  | 82.308  | 88.917  |
| 11694 | ENSG00000008710 | PKD1       | -1.1 | 0.0090922 | 0.0337007 | 7.476   | 0.221 | 7.339   | 7.731   | 8.705   | 0.885  | 8.186   | 9.727   |
| 11695 | ENSG00000166473 | PKD1L2     | 1.3  | 6.922E-06 | 9.723E-05 | 4.213   | 0.103 | 4.096   | 4.293   | 3.197   | 0.426  | 2.775   | 3.627   |
| 11696 | ENSG00000244257 | PKD1P1     | -1.4 | 0.0025802 | 0.0124828 | 1.704   | 0.123 | 1.606   | 1.842   | 2.358   | 0.210  | 2.177   | 2.588   |
| 11697 | ENSG00000254681 | PKD1P5     | -1.3 | 1.337E-05 | 0.0001707 | 4.346   | 0.096 | 4.268   | 4.454   | 5.903   | 0.534  | 5.422   | 6.477   |
| 11698 | ENSG00000250251 | PKD1P6     | -1.2 | 0.0029308 | 0.0138054 | 14.819  | 0.073 | 14.768  | 14.902  | 17.721  | 1.602  | 15.880  | 18.804  |
| 11699 | ENSG00000118762 | PKD2       | 1.2  | 8.02E-06  | 0.0001105 | 27.642  | 0.831 | 26.774  | 28.430  | 23.114  | 0.178  | 22.928  | 23.282  |
| 11702 | ENSG00000171033 | PKIA       | 1.2  | 0.0011754 | 0.0066937 | 13.596  | 0.227 | 13.393  | 13.842  | 11.763  | 0.303  | 11.574  | 12.113  |
| 11705 | ENSG00000135549 | PKIB       | 1.3  | 1.501E-05 | 0.0001861 | 18.081  | 1.021 | 17.321  | 19.242  | 14.094  | 1.543  | 12.806  | 15.804  |
| 11706 | ENSG00000168734 | PKIG       | 1.3  | 0.0003274 | 0.0023683 | 20.869  | 1.120 | 19.710  | 21.946  | 17.014  | 1.339  | 15.579  | 18.230  |
| 11707 | ENSG00000143627 | PKLR       | 1.2  | 0.0936733 | 0.2037942 | 5.207   | 0.712 | 4.568   | 5.975   | 4.437   | 0.966  | 3.322   | 5.018   |
| 11708 | ENSG00000067225 | PKM        | -1.1 | 0.0002534 | 0.0019311 | 318.493 | 4.817 | 314.143 | 323.671 | 358.999 | 17.060 | 343.714 | 377.404 |
| 11713 | ENSG00000065243 | PKN2       | -1.1 | 0.0282264 | 0.0823803 | 29.881  | 1.136 | 28.640  | 30.869  | 32.921  | 1.342  | 31.704  | 34.360  |
| 11715 | ENSG00000160199 | PKNOX1     | 1.1  | 0.04648   | 0.1201095 | 10.542  | 0.472 | 10.016  | 10.928  | 9.861   | 0.146  | 9.748   | 10.026  |
| 11716 | ENSG00000165495 | PKNOX2     | -1.5 | 0.0019155 | 0.0098293 | 0.960   | 0.166 | 0.813   | 1.139   | 1.498   | 0.164  | 1.316   | 1.634   |
| 11717 | ENSG00000057294 | PKP2       | 1.2  | 4.2E-05   | 0.0004437 | 25.505  | 0.809 | 24.887  | 26.420  | 22.113  | 1.661  | 20.540  | 23.849  |
| 11718 | ENSG00000184363 | PKP3       | -1.2 | 0.0741745 | 0.1710544 | 3.885   | 0.226 | 3.698   | 4.135   | 4.725   | 1.274  | 3.349   | 5.864   |
| 11719 | ENSG00000103066 | PLA2G15    | 1.2  | 0.02615   | 0.0775786 | 6.437   | 0.189 | 6.241   | 6.619   | 5.595   | 0.366  | 5.197   | 5.914   |

|       | A               | B       | C    | D         | E         | F       | G     | H       | I       | J      | K     | L      | M      |
|-------|-----------------|---------|------|-----------|-----------|---------|-------|---------|---------|--------|-------|--------|--------|
| 11720 | ENSG00000176485 | PLA2G16 | 2.2  | 3.19E-22  | 3.00E-19  | 110.616 | 3.899 | 106.753 | 114.550 | 51.640 | 3.378 | 49.640 | 55.540 |
| 11722 | ENSG00000100078 | PLA2G3  | 1.5  | 1.033E-10 | 6.644E-09 | 31.252  | 0.941 | 30.273  | 32.150  | 21.132 | 1.939 | 19.348 | 23.196 |
| 11723 | ENSG00000105499 | PLA2G4C | 1.3  | 0.0001653 | 0.0013671 | 5.106   | 0.346 | 4.826   | 5.492   | 4.010  | 0.246 | 3.735  | 4.210  |
| 11725 | ENSG00000184381 | PLA2G6  | -1.1 | 0.1215636 | 0.2453174 | 7.973   | 0.609 | 7.450   | 8.642   | 8.883  | 0.327 | 8.679  | 9.261  |
| 11726 | ENSG00000146070 | PLA2G7  | 1.2  | 0.0502948 | 0.1275699 | 8.753   | 1.274 | 7.943   | 10.222  | 7.493  | 0.805 | 6.870  | 8.402  |
| 11727 | ENSG00000104368 | PLAT    | 2.5  | 5.926E-09 | 2.37E-07  | 2.550   | 0.559 | 2.161   | 3.190   | 1.039  | 0.187 | 0.832  | 1.197  |
| 11728 | ENSG00000122861 | PLAU    | 1.5  | 4.417E-09 | 1.831E-07 | 43.577  | 2.624 | 41.362  | 46.475  | 30.622 | 3.314 | 26.954 | 33.400 |
| 11729 | ENSG00000011422 | PLAUR   | 1.2  | 0.0428152 | 0.1125829 | 6.302   | 0.293 | 5.983   | 6.559   | 5.584  | 0.465 | 5.053  | 5.916  |
| 11730 | ENSG00000151176 | PLBD2   | 1.2  | 7.381E-05 | 0.0007061 | 27.466  | 1.109 | 26.301  | 28.509  | 23.558 | 1.023 | 22.675 | 24.679 |
| 11733 | ENSG00000101333 | PLCB4   | 1.2  | 5.624E-05 | 0.0005638 | 11.665  | 0.354 | 11.412  | 12.070  | 9.697  | 0.163 | 9.543  | 9.868  |
| 11734 | ENSG00000187091 | PLCD1   | -1.1 | 0.0358504 | 0.0985914 | 11.548  | 0.219 | 11.336  | 11.773  | 13.334 | 0.637 | 12.780 | 14.030 |
| 11735 | ENSG00000197943 | PLCG2   | 1.1  | 0.1204122 | 0.2435289 | 3.742   | 0.217 | 3.520   | 3.953   | 3.472  | 0.322 | 3.110  | 3.727  |
| 11736 | ENSG00000114805 | PLCH1   | -1.1 | 0.1056447 | 0.2217109 | 8.108   | 0.410 | 7.683   | 8.501   | 9.008  | 0.171 | 8.812  | 9.120  |
| 11737 | ENSG00000154822 | PLCL2   | -1.4 | 1.519E-08 | 5.352E-07 | 19.520  | 2.110 | 17.805  | 21.877  | 28.136 | 0.427 | 27.644 | 28.409 |
| 11739 | ENSG00000182378 | PLCXD1  | -1.1 | 3.994E-05 | 0.0004256 | 41.596  | 1.263 | 40.256  | 42.763  | 48.602 | 1.082 | 47.851 | 49.843 |
| 11740 | ENSG00000240891 | PLCXD2  | -1.2 | 0.0132576 | 0.0457698 | 1.953   | 0.156 | 1.776   | 2.074   | 2.435  | 0.161 | 2.248  | 2.529  |
| 11741 | ENSG00000105223 | PLD3    | 1.1  | 0.001745  | 0.0091572 | 70.883  | 4.211 | 66.246  | 74.468  | 64.803 | 4.085 | 62.196 | 69.511 |
| 11742 | ENSG00000052126 | PLEKHA5 | -1.1 | 0.0104421 | 0.037793  | 20.360  | 0.717 | 19.551  | 20.917  | 22.537 | 0.835 | 22.047 | 23.501 |
| 11743 | ENSG00000143850 | PLEKHA6 | 1.2  | 0.0031907 | 0.0147971 | 4.620   | 0.290 | 4.295   | 4.852   | 3.913  | 0.174 | 3.802  | 4.113  |
| 11744 | ENSG00000166689 | PLEKHA7 | 1.3  | 8.027E-06 | 0.0001105 | 7.281   | 0.240 | 7.046   | 7.526   | 5.775  | 0.259 | 5.555  | 6.061  |
| 11745 | ENSG00000021300 | PLEKHB1 | -1.3 | 0.0010886 | 0.0063013 | 6.099   | 1.036 | 5.238   | 7.248   | 7.932  | 0.302 | 7.736  | 8.280  |
| 11750 | ENSG00000115762 | PLEKHB2 | -1.1 | 0.0033126 | 0.0152567 | 50.718  | 1.204 | 49.510  | 51.918  | 56.717 | 1.822 | 54.810 | 58.440 |
| 11751 | ENSG00000175895 | PLEKHF2 | 1.2  | 0.0209424 | 0.065435  | 11.518  | 1.064 | 10.401  | 12.519  | 10.124 | 0.828 | 9.223  | 10.853 |
| 11752 | ENSG00000090924 | PLEKHG2 | 1.1  | 0.0415481 | 0.1100725 | 12.975  | 0.449 | 12.534  | 13.432  | 12.124 | 0.855 | 11.464 | 13.090 |
| 11754 | ENSG00000126822 | PLEKHG3 | 1.1  | 0.0021182 | 0.0106062 | 13.912  | 0.999 | 12.762  | 14.561  | 12.647 | 0.406 | 12.179 | 12.905 |
| 11756 | ENSG00000196155 | PLEKHG4 | 1.2  | 0.0184306 | 0.0591718 | 8.753   | 0.825 | 7.878   | 9.516   | 7.763  | 0.870 | 6.787  | 8.456  |
| 11757 | ENSG00000171680 | PLEKHG5 | -1.3 | 5.476E-07 | 1.168E-05 | 9.739   | 0.745 | 8.882   | 10.224  | 13.164 | 0.398 | 12.839 | 13.608 |
| 11759 | ENSG00000008323 | PLEKHG6 | -1.3 | 1.01E-05  | 0.0001345 | 10.280  | 0.355 | 9.988   | 10.675  | 14.059 | 0.987 | 12.942 | 14.808 |
| 11760 | ENSG00000054690 | PLEKHH1 | 1.1  | 0.0306042 | 0.0875967 | 14.962  | 0.185 | 14.834  | 15.174  | 14.144 | 0.513 | 13.797 | 14.733 |
| 11761 | ENSG00000068137 | PLEKHH3 | -1.3 | 2.2E-05   | 0.0002582 | 12.663  | 0.730 | 12.128  | 13.495  | 16.537 | 0.440 | 16.122 | 16.998 |
| 11762 | ENSG00000104886 | PLEKHJ1 | -1.1 | 0.0016999 | 0.008971  | 33.058  | 0.866 | 32.069  | 33.684  | 37.967 | 0.955 | 37.032 | 38.940 |
| 11763 | ENSG00000225190 | PLEKHM1 | -1.1 | 0.104273  | 0.2197319 | 2.652   | 0.026 | 2.630   | 2.680   | 3.041  | 0.368 | 2.632  | 3.345  |
| 11767 | ENSG00000116786 | PLEKHM2 | -1.1 | 0.0015491 | 0.008315  | 38.158  | 1.268 | 36.867  | 39.401  | 44.500 | 3.773 | 40.614 | 48.149 |
| 11768 | ENSG00000023902 | PLEKHO1 | 1.2  | 0.0051076 | 0.0214812 | 8.986   | 0.464 | 8.669   | 9.519   | 7.787  | 1.049 | 6.931  | 8.958  |
| 11770 | ENSG00000241839 | PLEKHO2 | 1.1  | 0.0611761 | 0.1478525 | 16.881  | 0.208 | 16.674  | 17.090  | 15.767 | 0.446 | 15.321 | 16.213 |
| 11772 | ENSG00000107020 | PLGRKT  | 1.2  | 0.0059125 | 0.0241233 | 32.971  | 0.102 | 32.853  | 33.030  | 28.587 | 0.778 | 27.721 | 29.227 |
| 11773 | ENSG00000166851 | PLK1    | -1.5 | 2.18E-13  | 2.73E-11  | 56.849  | 4.210 | 52.082  | 60.058  | 85.279 | 4.337 | 80.292 | 88.177 |
| 11774 | ENSG00000142731 | PLK4    | -1.1 | 0.0013408 | 0.007406  | 37.524  | 1.940 | 35.303  | 38.892  | 43.458 | 2.558 | 40.644 | 45.643 |
| 11775 | ENSG00000083444 | PLOD1   | 1.2  | 1.104E-06 | 2.074E-05 | 35.968  | 1.426 | 35.052  | 37.610  | 30.169 | 0.938 | 29.516 | 31.244 |
| 11776 | ENSG00000152952 | PLOD2   | 1.1  | 0.0040781 | 0.018032  | 17.697  | 1.313 | 16.907  | 19.214  | 16.096 | 0.685 | 15.607 | 16.879 |
| 11778 | ENSG00000106397 | PLOD3   | 1.1  | 0.0268726 | 0.0791393 | 14.835  | 0.790 | 14.042  | 15.621  | 13.441 | 1.440 | 12.405 | 15.086 |
| 11779 | ENSG00000123560 | PLP1    | -1.2 | 0.003154  | 0.0146819 | 39.413  | 4.535 | 34.227  | 42.635  | 48.561 | 4.685 | 43.905 | 53.274 |
| 11781 | ENSG00000067113 | PLPP1   | 1.4  | 5.551E-09 | 2.257E-07 | 79.336  | 3.973 | 74.921  | 82.622  | 59.504 | 3.803 | 56.466 | 63.770 |

|       | A               | B       | C    | D         | E         | F       | G      | H       | I       | J       | K     | L       | M       |
|-------|-----------------|---------|------|-----------|-----------|---------|--------|---------|---------|---------|-------|---------|---------|
| 11782 | ENSG00000141934 | PLPP2   | 1.1  | 0.0169145 | 0.0554192 | 9.155   | 0.260  | 8.979   | 9.454   | 8.264   | 0.177 | 8.065   | 8.404   |
| 11784 | ENSG00000162407 | PLPP3   | -1.2 | 1.17E-06  | 2.161E-05 | 29.144  | 0.666  | 28.378  | 29.594  | 37.014  | 1.379 | 35.475  | 38.138  |
| 11785 | ENSG00000147535 | PLPP5   | -1.2 | 0.0002606 | 0.0019756 | 24.656  | 1.715  | 23.072  | 26.477  | 30.286  | 0.431 | 29.854  | 30.717  |
| 11788 | ENSG00000205808 | PLPP6   | 1.1  | 0.1097494 | 0.2280614 | 24.653  | 0.268  | 24.389  | 24.925  | 23.280  | 0.332 | 22.897  | 23.474  |
| 11789 | ENSG00000160539 | PLPP7   | -1.2 | 0.0526612 | 0.1322236 | 4.431   | 0.415  | 4.013   | 4.844   | 5.564   | 0.978 | 4.985   | 6.694   |
| 11790 | ENSG00000105520 | PLPPR2  | -1.5 | 6.639E-05 | 0.0006472 | 4.390   | 0.289  | 4.060   | 4.597   | 6.641   | 0.706 | 6.017   | 7.407   |
| 11791 | ENSG00000129951 | PLPPR3  | -1.3 | 0.0003166 | 0.002309  | 21.886  | 0.416  | 21.438  | 22.261  | 28.745  | 4.617 | 25.146  | 33.950  |
| 11792 | ENSG00000117600 | PLPPR4  | 1.2  | 0.1084873 | 0.226217  | 1.088   | 0.099  | 0.986   | 1.183   | 0.893   | 0.036 | 0.869   | 0.934   |
| 11793 | ENSG00000102024 | PLS3    | 1.2  | 5.575E-07 | 1.182E-05 | 434.217 | 11.747 | 420.786 | 442.570 | 382.646 | 8.831 | 373.389 | 390.978 |
| 11796 | ENSG00000188313 | PLSCR1  | 1.2  | 0.0004061 | 0.0028243 | 24.763  | 0.891  | 23.755  | 25.447  | 21.346  | 1.568 | 19.568  | 22.534  |
| 11800 | ENSG00000114698 | PLSCR4  | 1.2  | 0.0269355 | 0.0793106 | 3.575   | 0.245  | 3.318   | 3.807   | 2.951   | 0.391 | 2.664   | 3.395   |
| 11801 | ENSG00000161381 | PLXDC1  | 1.4  | 0.0527805 | 0.132425  | 0.501   | 0.114  | 0.382   | 0.610   | 0.365   | 0.090 | 0.306   | 0.469   |
| 11802 | ENSG00000120594 | PLXDC2  | 1.2  | 5.294E-06 | 7.813E-05 | 15.693  | 0.943  | 14.843  | 16.707  | 13.158  | 0.833 | 12.345  | 14.010  |
| 11804 | ENSG00000130827 | PLXNA3  | -1.2 | 0.0008921 | 0.0053163 | 3.348   | 0.160  | 3.230   | 3.530   | 4.190   | 0.247 | 3.919   | 4.403   |
| 11807 | ENSG00000221866 | PLXNA4  | -1.4 | 0.0322885 | 0.0913814 | 0.199   | 0.030  | 0.164   | 0.217   | 0.296   | 0.050 | 0.247   | 0.347   |
| 11808 | ENSG00000164050 | PLXNB1  | -1.1 | 0.0026847 | 0.0129067 | 26.708  | 1.308  | 25.682  | 28.181  | 30.590  | 2.678 | 28.206  | 33.488  |
| 11809 | ENSG00000198753 | PLXNB3  | -1.4 | 0.0802617 | 0.1817258 | 0.408   | 0.078  | 0.319   | 0.464   | 0.583   | 0.056 | 0.548   | 0.647   |
| 11810 | ENSG00000004399 | PLXND1  | 1.2  | 8.114E-05 | 0.0007611 | 25.851  | 0.827  | 25.183  | 26.776  | 22.444  | 2.327 | 20.891  | 25.119  |
| 11812 | ENSG00000185664 | PMEL    | 1.9  | 1.34E-22  | 1.51E-19  | 183.789 | 7.867  | 174.706 | 188.399 | 101.429 | 2.023 | 99.294  | 103.317 |
| 11814 | ENSG00000140464 | PML     | -1.2 | 0.0084633 | 0.0319082 | 5.559   | 0.132  | 5.459   | 5.708   | 6.552   | 0.739 | 5.951   | 7.377   |
| 11815 | ENSG00000109099 | PMP22   | -1.4 | 0.0493224 | 0.1257447 | 1.587   | 0.135  | 1.465   | 1.732   | 2.283   | 0.621 | 1.593   | 2.796   |
| 11817 | ENSG00000122512 | PMS2    | 1.1  | 0.0574678 | 0.1410876 | 14.024  | 0.527  | 13.456  | 14.498  | 12.833  | 1.194 | 12.020  | 14.204  |
| 11818 | ENSG00000078319 | PMS2P1  | -1.2 | 0.0494774 | 0.1260257 | 17.629  | 1.970  | 15.434  | 19.246  | 20.825  | 1.301 | 19.430  | 22.004  |
| 11819 | ENSG00000127957 | PMS2P3  | -1.3 | 0.018801  | 0.0600305 | 5.347   | 0.528  | 4.943   | 5.944   | 7.088   | 0.514 | 6.519   | 7.517   |
| 11820 | ENSG00000130822 | PNCK    | -1.3 | 0.0206671 | 0.0647182 | 1.913   | 0.579  | 1.428   | 2.554   | 2.604   | 0.286 | 2.360   | 2.918   |
| 11821 | ENSG00000132424 | PNISR   | -1.1 | 0.0026348 | 0.0127158 | 125.621 | 1.720  | 124.376 | 127.583 | 143.831 | 8.148 | 135.407 | 151.672 |
| 11823 | ENSG00000240694 | PNMA2   | 1.9  | 2.038E-10 | 1.231E-08 | 6.313   | 1.014  | 5.213   | 7.210   | 3.355   | 0.282 | 3.081   | 3.644   |
| 11825 | ENSG00000183837 | PNMA3   | 1.4  | 0.0003492 | 0.0024987 | 6.273   | 1.005  | 5.160   | 7.115   | 4.592   | 0.411 | 4.252   | 5.049   |
| 11826 | ENSG00000235961 | PNMA6A  | 1.3  | 0.0663593 | 0.1574102 | 3.376   | 0.372  | 3.041   | 3.777   | 2.613   | 0.791 | 1.700   | 3.080   |
| 11827 | ENSG00000182013 | PNMA8A  | 1.1  | 0.0510655 | 0.1290603 | 41.429  | 1.141  | 40.387  | 42.648  | 39.380  | 1.502 | 37.974  | 40.962  |
| 11828 | ENSG00000100941 | PNN     | 1.1  | 0.0034235 | 0.0156701 | 273.709 | 3.237  | 270.582 | 277.046 | 257.183 | 7.133 | 251.065 | 265.018 |
| 11829 | ENSG00000115946 | PNO1    | 1.1  | 0.0131123 | 0.0453328 | 47.577  | 2.518  | 45.854  | 50.466  | 44.031  | 2.923 | 41.410  | 47.183  |
| 11830 | ENSG00000198805 | PNP     | 1.3  | 1.546E-08 | 5.436E-07 | 45.200  | 0.457  | 44.768  | 45.678  | 36.351  | 1.027 | 35.482  | 37.483  |
| 11833 | ENSG00000177666 | PNPLA2  | -1.1 | 0.0596275 | 0.1450007 | 20.040  | 0.897  | 19.190  | 20.977  | 22.642  | 2.668 | 21.014  | 25.721  |
| 11834 | ENSG00000100344 | PNPLA3  | 1.6  | 4.985E-09 | 2.041E-07 | 16.134  | 1.423  | 14.527  | 17.233  | 10.584  | 0.698 | 9.837   | 11.220  |
| 11838 | ENSG00000006757 | PNPLA4  | 1.1  | 0.0054231 | 0.022486  | 25.400  | 1.302  | 23.899  | 26.238  | 22.838  | 0.854 | 22.226  | 23.813  |
| 11840 | ENSG00000032444 | PNPLA6  | -1.2 | 0.0013572 | 0.0074695 | 26.844  | 1.219  | 26.080  | 28.250  | 31.687  | 3.758 | 28.991  | 35.980  |
| 11841 | ENSG00000108439 | PNPO    | 1.2  | 0.0283484 | 0.0826364 | 14.325  | 0.741  | 13.469  | 14.769  | 12.626  | 1.491 | 11.083  | 14.059  |
| 11842 | ENSG00000189266 | PNRC2   | -1.1 | 0.0877029 | 0.1943044 | 137.515 | 5.675  | 132.734 | 143.787 | 147.741 | 3.384 | 144.438 | 151.201 |
| 11843 | ENSG00000228217 | PNRC2P1 | -1.2 | 0.0242002 | 0.0731149 | 33.033  | 0.694  | 32.362  | 33.747  | 41.126  | 1.864 | 39.195  | 42.914  |
| 11844 | ENSG00000132000 | PODNL1  | -1.4 | 0.1187336 | 0.2409559 | 0.604   | 0.107  | 0.496   | 0.709   | 0.838   | 0.191 | 0.681   | 1.051   |
| 11845 | ENSG00000186866 | POFUT2  | -1.1 | 0.0159682 | 0.0530799 | 19.010  | 0.365  | 18.689  | 19.406  | 21.464  | 0.606 | 20.982  | 22.145  |
| 11846 | ENSG00000143442 | POGZ    | -1.1 | 0.002793  | 0.0133173 | 34.834  | 1.686  | 33.160  | 36.532  | 39.088  | 1.624 | 37.237  | 40.272  |

|       | A               | B        | C    | D         | E         | F       | G      | H       | I       | J       | K     | L       | M       |
|-------|-----------------|----------|------|-----------|-----------|---------|--------|---------|---------|---------|-------|---------|---------|
| 11851 | ENSG00000101868 | POLA1    | 1.1  | 0.0308623 | 0.0882459 | 49.605  | 0.652  | 48.909  | 50.203  | 47.389  | 2.332 | 45.883  | 50.075  |
| 11853 | ENSG00000004142 | POLDIP2  | 1.1  | 0.0406734 | 0.1084058 | 95.921  | 2.738  | 92.791  | 97.873  | 91.474  | 3.768 | 87.653  | 95.186  |
| 11855 | ENSG00000177084 | POLE     | 1.1  | 0.0998839 | 0.2130847 | 14.932  | 0.494  | 14.392  | 15.362  | 14.417  | 0.917 | 13.394  | 15.166  |
| 11857 | ENSG00000140521 | POLG     | -1.2 | 1.088E-07 | 2.927E-06 | 33.452  | 1.760  | 31.554  | 35.029  | 42.459  | 2.288 | 40.928  | 45.089  |
| 11859 | ENSG00000256525 | POLG2    | -1.2 | 0.0009095 | 0.0054008 | 22.603  | 1.104  | 21.498  | 23.707  | 27.283  | 1.628 | 25.440  | 28.529  |
| 11861 | ENSG00000170734 | POLH     | -1.3 | 0.0002241 | 0.0017487 | 15.703  | 1.400  | 14.565  | 17.267  | 20.180  | 2.311 | 17.548  | 21.874  |
| 11863 | ENSG00000166169 | POLL     | -1.1 | 0.0399697 | 0.1069294 | 15.115  | 0.978  | 14.002  | 15.833  | 16.929  | 0.811 | 16.390  | 17.862  |
| 11864 | ENSG00000122678 | POLM     | -1.3 | 0.000369  | 0.0026159 | 7.295   | 0.287  | 7.039   | 7.606   | 9.676   | 1.495 | 8.514   | 11.363  |
| 11865 | ENSG00000130997 | POLN     | -1.4 | 0.121051  | 0.2444579 | 0.211   | 0.069  | 0.153   | 0.287   | 0.310   | 0.032 | 0.282   | 0.344   |
| 11866 | ENSG00000051341 | POLQ     | -1.2 | 6.458E-05 | 0.0006325 | 13.205  | 0.635  | 12.644  | 13.894  | 15.925  | 0.540 | 15.332  | 16.387  |
| 11867 | ENSG00000068654 | POLR1A   | 1.1  | 0.0038302 | 0.0171377 | 17.056  | 0.437  | 16.611  | 17.485  | 15.844  | 0.328 | 15.530  | 16.185  |
| 11869 | ENSG00000186184 | POLR1D   | -1.1 | 0.0001978 | 0.0015817 | 26.749  | 0.315  | 26.385  | 26.940  | 30.693  | 0.557 | 30.052  | 31.060  |
| 11870 | ENSG00000137054 | POLR1E   | -1.1 | 0.093974  | 0.2043605 | 31.507  | 0.681  | 30.760  | 32.092  | 34.571  | 1.012 | 33.484  | 35.486  |
| 11871 | ENSG00000181222 | POLR2A   | -1.2 | 4.616E-07 | 1.01E-05  | 64.667  | 3.083  | 61.108  | 66.495  | 78.315  | 3.586 | 75.424  | 82.327  |
| 11872 | ENSG00000047315 | POLR2B   | -1.1 | 0.0001436 | 0.0012153 | 101.752 | 3.385  | 99.424  | 105.636 | 116.520 | 4.422 | 113.402 | 121.581 |
| 11873 | ENSG00000144231 | POLR2D   | -1.1 | 0.0354565 | 0.097784  | 28.784  | 1.086  | 27.535  | 29.506  | 31.817  | 2.160 | 29.746  | 34.057  |
| 11874 | ENSG00000099817 | POLR2E   | -1.1 | 0.0037372 | 0.0167971 | 53.547  | 1.438  | 51.899  | 54.541  | 60.145  | 2.808 | 57.683  | 63.203  |
| 11875 | ENSG00000163882 | POLR2H   | -1.2 | 0.0001888 | 0.0015246 | 48.052  | 2.004  | 46.726  | 50.357  | 56.570  | 0.961 | 55.584  | 57.503  |
| 11876 | ENSG00000168255 | POLR2J3  | 1.1  | 0.091951  | 0.2013162 | 2.643   | 0.178  | 2.464   | 2.821   | 2.385   | 0.070 | 2.323   | 2.460   |
| 11877 | ENSG00000255529 | POLR2M   | 1.1  | 0.0497783 | 0.1265254 | 14.810  | 0.572  | 14.323  | 15.440  | 13.775  | 0.144 | 13.608  | 13.861  |
| 11878 | ENSG00000148606 | POLR3A   | -1.1 | 0.0997759 | 0.212908  | 21.468  | 0.512  | 20.879  | 21.804  | 23.173  | 1.276 | 22.234  | 24.625  |
| 11879 | ENSG00000013503 | POLR3B   | 1.1  | 0.033843  | 0.09457   | 8.610   | 0.692  | 7.811   | 9.032   | 7.676   | 0.561 | 7.248   | 8.312   |
| 11880 | ENSG00000186141 | POLR3C   | 1.1  | 0.1086706 | 0.2265433 | 19.062  | 1.706  | 17.339  | 20.750  | 17.711  | 1.437 | 16.312  | 19.183  |
| 11881 | ENSG00000168495 | POLR3D   | -1.3 | 3.008E-08 | 9.689E-07 | 25.996  | 1.138  | 24.682  | 26.685  | 34.373  | 0.502 | 33.794  | 34.703  |
| 11882 | ENSG00000132664 | POLR3F   | 1.1  | 0.0443907 | 0.1158968 | 19.405  | 1.313  | 18.063  | 20.688  | 17.684  | 1.917 | 16.452  | 19.892  |
| 11883 | ENSG00000113356 | POLR3G   | 1.4  | 0.0002108 | 0.0016617 | 125.769 | 12.371 | 118.105 | 140.040 | 90.982  | 4.518 | 88.295  | 96.198  |
| 11885 | ENSG00000121851 | POLR3GL  | 1.3  | 0.0103725 | 0.0375655 | 12.222  | 2.615  | 10.594  | 15.238  | 9.781   | 1.111 | 8.520   | 10.618  |
| 11887 | ENSG00000268295 | POLR3GP1 | 1.7  | 0.0008956 | 0.0053334 | 19.260  | 1.941  | 18.017  | 21.496  | 11.251  | 0.464 | 10.761  | 11.685  |
| 11889 | ENSG00000266984 | POLR3GP2 | 1.5  | 0.0380798 | 0.1029775 | 4.899   | 1.256  | 3.680   | 6.189   | 3.269   | 1.004 | 2.209   | 4.205   |
| 11891 | ENSG00000161980 | POLR3K   | -1.1 | 0.0468582 | 0.1208283 | 31.500  | 1.992  | 29.232  | 32.968  | 35.513  | 1.866 | 33.366  | 36.752  |
| 11892 | ENSG00000099821 | POLRMT   | -1.2 | 0.0010326 | 0.0060325 | 29.801  | 0.285  | 29.472  | 29.981  | 35.082  | 3.386 | 32.763  | 38.968  |
| 11894 | ENSG00000185900 | POMK     | -1.3 | 0.0007095 | 0.0044142 | 8.442   | 0.439  | 7.937   | 8.737   | 11.654  | 0.937 | 10.756  | 12.625  |
| 11895 | ENSG00000146707 | POMZP3   | 1.2  | 0.0042853 | 0.0187571 | 19.069  | 1.902  | 16.899  | 20.442  | 15.834  | 1.132 | 14.729  | 16.990  |
| 11896 | ENSG00000104356 | POP1     | 1.1  | 0.0318828 | 0.0905514 | 7.795   | 0.431  | 7.394   | 8.252   | 7.002   | 0.387 | 6.742   | 7.446   |
| 11898 | ENSG00000127948 | POR      | -1.2 | 3.199E-06 | 5.032E-05 | 34.568  | 0.817  | 33.626  | 35.077  | 42.544  | 2.031 | 41.230  | 44.883  |
| 11899 | ENSG00000133110 | POSTN    | 1.3  | 0.1053584 | 0.2212473 | 0.642   | 0.064  | 0.568   | 0.682   | 0.488   | 0.054 | 0.455   | 0.550   |
| 11901 | ENSG00000188219 | POTEE    | 1.4  | 0.001951  | 0.0099747 | 4.323   | 0.574  | 3.896   | 4.975   | 3.167   | 0.164 | 2.987   | 3.309   |
| 11903 | ENSG00000222038 | POTEJ    | 1.3  | 0.0907956 | 0.1997432 | 1.596   | 0.151  | 1.426   | 1.714   | 1.266   | 0.168 | 1.119   | 1.449   |
| 11904 | ENSG00000143190 | POU2F1   | 1.1  | 0.0407989 | 0.108598  | 28.262  | 1.022  | 27.236  | 29.280  | 27.197  | 0.683 | 26.460  | 27.809  |
| 11905 | ENSG00000137709 | POU2F3   | 1.4  | 0.0324365 | 0.091693  | 0.706   | 0.081  | 0.622   | 0.785   | 0.503   | 0.046 | 0.452   | 0.541   |
| 11907 | ENSG00000185668 | POU3F1   | -1.7 | 1.713E-06 | 2.965E-05 | 5.201   | 0.699  | 4.397   | 5.662   | 9.014   | 1.034 | 7.822   | 9.668   |

|       | A               | B            | C    | D         | E         | F       | G      | H       | I       | J       | K      | L       | M       |
|-------|-----------------|--------------|------|-----------|-----------|---------|--------|---------|---------|---------|--------|---------|---------|
| 11908 | ENSG00000196767 | POU3F4       | -8.3 | 1.728E-07 | 4.408E-06 | 0.076   | 0.000  | 0.076   | 0.077   | 0.682   | 0.144  | 0.559   | 0.841   |
| 11909 | ENSG00000204531 | POU5F1       | 1.1  | 0.009028  | 0.033507  | 765.553 | 16.267 | 755.096 | 784.295 | 734.767 | 27.795 | 706.133 | 761.639 |
| 11910 | ENSG00000212993 | POU5F1B      | 1.1  | 0.0028436 | 0.0134716 | 97.302  | 3.512  | 93.270  | 99.689  | 91.286  | 2.354  | 88.643  | 93.156  |
| 11911 | ENSG00000235602 | POU5F1P3     | 1.1  | 0.0357749 | 0.0984318 | 417.565 | 15.407 | 407.734 | 435.322 | 400.660 | 15.082 | 386.088 | 416.206 |
| 11912 | ENSG00000106536 | POU6F2       | -1.2 | 0.0363675 | 0.099676  | 1.350   | 0.145  | 1.221   | 1.507   | 1.714   | 0.155  | 1.585   | 1.886   |
| 11914 | ENSG00000180817 | PPA1         | -1.1 | 0.0011715 | 0.0066822 | 49.911  | 2.093  | 47.496  | 51.195  | 56.967  | 1.679  | 55.050  | 58.177  |
| 11915 | ENSG00000155846 | PPARGC1B     | 1.1  | 0.0176323 | 0.0570747 | 3.850   | 0.126  | 3.725   | 3.976   | 3.457   | 0.096  | 3.385   | 3.567   |
| 11916 | ENSG00000128059 | PPAT         | -1.1 | 0.0062994 | 0.0253077 | 65.881  | 0.852  | 65.244  | 66.848  | 73.263  | 1.403  | 72.032  | 74.791  |
| 11917 | ENSG00000241293 | PPATP1       | -1.2 | 0.0441951 | 0.1155647 | 11.218  | 0.613  | 10.689  | 11.890  | 13.467  | 1.237  | 12.190  | 14.659  |
| 11920 | ENSG00000127125 | PPCS         | 1.2  | 0.0007409 | 0.0045734 | 38.522  | 1.458  | 37.045  | 39.961  | 33.735  | 0.656  | 33.218  | 34.473  |
| 11921 | ENSG00000125534 | PPDPF        | -1.1 | 0.1126408 | 0.2321654 | 107.326 | 6.323  | 100.814 | 113.441 | 119.575 | 11.128 | 111.360 | 132.239 |
| 11922 | ENSG00000177380 | PPFIA3       | -1.2 | 0.0011423 | 0.0065379 | 7.170   | 0.392  | 6.721   | 7.443   | 8.758   | 0.211  | 8.589   | 8.995   |
| 11923 | ENSG00000143847 | PPFIA4       | -1.7 | 1.096E-08 | 4.046E-07 | 2.142   | 0.261  | 1.840   | 2.302   | 3.757   | 0.450  | 3.438   | 4.272   |
| 11924 | ENSG00000166387 | PPFIBP2      | -1.3 | 0.0004666 | 0.0031614 | 3.249   | 0.143  | 3.129   | 3.408   | 4.188   | 0.373  | 3.973   | 4.619   |
| 11925 | ENSG00000134283 | PPHLN1       | -1.1 | 0.0175527 | 0.056867  | 13.724  | 0.495  | 13.201  | 14.184  | 15.248  | 0.580  | 14.578  | 15.583  |
| 11927 | ENSG00000166794 | PPIB         | 1.1  | 0.0393584 | 0.105645  | 337.604 | 2.365  | 335.526 | 340.178 | 327.442 | 4.879  | 322.334 | 332.053 |
| 11928 | ENSG00000171497 | PPID         | 1.1  | 0.0145841 | 0.0493718 | 63.898  | 1.561  | 62.141  | 65.126  | 59.446  | 3.074  | 56.164  | 62.258  |
| 11930 | ENSG00000084072 | PPIE         | -1.1 | 0.0051423 | 0.0215971 | 12.819  | 0.954  | 11.722  | 13.454  | 14.879  | 0.211  | 14.640  | 15.037  |
| 11931 | ENSG00000137168 | PPIL1        | 1.1  | 0.0367339 | 0.1004008 | 144.612 | 3.293  | 141.527 | 148.080 | 138.696 | 1.457  | 137.290 | 140.199 |
| 11932 | ENSG00000185250 | PPIL6        | 1.9  | 0.0008616 | 0.0051802 | 1.036   | 0.242  | 0.758   | 1.197   | 0.541   | 0.150  | 0.372   | 0.658   |
| 11933 | ENSG00000118898 | PPL          | 1.2  | 0.000104  | 0.0009321 | 29.991  | 0.660  | 29.425  | 30.717  | 26.293  | 2.054  | 24.489  | 28.529  |
| 11934 | ENSG00000138032 | PPM1B        | 1.3  | 2.148E-10 | 1.288E-08 | 101.897 | 3.995  | 97.366  | 104.913 | 81.297  | 1.132  | 80.324  | 82.539  |
| 11935 | ENSG00000170836 | PPM1D        | -1.2 | 0.0004342 | 0.0029832 | 11.743  | 1.649  | 10.663  | 13.640  | 14.935  | 1.399  | 13.547  | 16.345  |
| 11936 | ENSG00000175175 | PPM1E        | -1.2 | 0.0007364 | 0.0045539 | 16.876  | 0.662  | 16.137  | 17.412  | 19.913  | 0.873  | 18.967  | 20.689  |
| 11938 | ENSG00000100034 | PPM1F        | -1.1 | 0.0485363 | 0.1241711 | 9.880   | 0.409  | 9.427   | 10.221  | 10.988  | 0.809  | 10.273  | 11.866  |
| 11942 | ENSG00000111110 | PPM1H        | -1.1 | 0.1030281 | 0.217852  | 29.087  | 0.376  | 28.722  | 29.473  | 31.508  | 1.710  | 29.574  | 32.817  |
| 11943 | ENSG00000155367 | PPM1J        | -1.3 | 4.552E-05 | 0.000474  | 15.305  | 2.095  | 13.622  | 17.651  | 20.613  | 2.264  | 18.913  | 23.182  |
| 11946 | ENSG00000163644 | PPM1K        | -1.1 | 0.0467291 | 0.1205873 | 4.853   | 0.304  | 4.520   | 5.116   | 5.600   | 0.395  | 5.213   | 6.003   |
| 11948 | ENSG00000214517 | PPME1        | 1.1  | 0.0243702 | 0.0735368 | 16.462  | 0.574  | 15.864  | 17.008  | 15.389  | 0.422  | 15.093  | 15.873  |
| 11949 | ENSG00000213639 | PPP1CB       | 1.1  | 0.0002828 | 0.0021119 | 93.101  | 0.768  | 92.509  | 93.969  | 84.488  | 2.368  | 81.838  | 86.399  |
| 11952 | ENSG00000186298 | PPP1CC       | -1.2 | 9.718E-10 | 4.764E-08 | 203.252 | 1.568  | 201.883 | 204.962 | 250.286 | 5.450  | 244.013 | 253.859 |
| 11954 | ENSG00000204569 | PPP1R10      | -1.1 | 0.0345088 | 0.0959    | 29.768  | 2.475  | 27.197  | 32.134  | 33.049  | 0.765  | 32.193  | 33.666  |
| 11958 | ENSG00000257557 | PPP1R12A-AS1 | 1.8  | 5.118E-05 | 0.0005215 | 2.854   | 0.303  | 2.626   | 3.198   | 1.643   | 0.043  | 1.596   | 1.681   |
| 11960 | ENSG00000125503 | PPP1R12C     | -1.1 | 0.1017696 | 0.2159093 | 12.009  | 0.248  | 11.741  | 12.230  | 13.119  | 0.285  | 12.844  | 13.414  |
| 11962 | ENSG00000088808 | PPP1R13B     | 1.3  | 0.0022484 | 0.0111254 | 3.353   | 0.567  | 2.714   | 3.794   | 2.632   | 0.360  | 2.273   | 2.992   |
| 11963 | ENSG00000104881 | PPP1R13L     | -1.2 | 0.0018798 | 0.0096871 | 5.082   | 0.159  | 4.944   | 5.255   | 6.466   | 0.237  | 6.203   | 6.666   |
| 11965 | ENSG00000167641 | PPP1R14A     | -1.3 | 0.0030147 | 0.0141513 | 8.489   | 1.222  | 7.087   | 9.330   | 11.494  | 0.380  | 11.118  | 11.878  |
| 11967 | ENSG00000179967 | PPP1R14B P3  | -1.1 | 0.0312313 | 0.08903   | 237.221 | 14.569 | 223.326 | 252.381 | 265.025 | 8.945  | 258.366 | 275.192 |

|       | A               | B        | C    | D         | E         | F       | G     | H       | I       | J       | K     | L       | M       |
|-------|-----------------|----------|------|-----------|-----------|---------|-------|---------|---------|---------|-------|---------|---------|
| 11968 | ENSG00000087074 | PPP1R15A | 1.3  | 1.946E-05 | 0.0002324 | 22.684  | 0.823 | 21.767  | 23.357  | 18.271  | 0.785 | 17.373  | 18.831  |
| 11971 | ENSG00000158615 | PPP1R15B | -1.1 | 0.0030943 | 0.0144687 | 44.620  | 2.239 | 42.991  | 47.174  | 50.894  | 3.732 | 46.854  | 54.214  |
| 11972 | ENSG00000160972 | PPP1R16A | -1.3 | 0.0005676 | 0.0037106 | 5.963   | 0.255 | 5.669   | 6.113   | 7.705   | 0.683 | 7.286   | 8.493   |
| 11973 | ENSG00000101445 | PPP1R16B | -1.1 | 0.0429728 | 0.112927  | 7.483   | 0.245 | 7.272   | 7.751   | 8.525   | 0.662 | 7.797   | 9.091   |
| 11976 | ENSG00000135447 | PPP1R1A  | -1.5 | 0.0001227 | 0.0010684 | 3.646   | 0.391 | 3.228   | 4.003   | 5.461   | 0.420 | 5.113   | 5.928   |
| 11977 | ENSG00000131771 | PPP1R1B  | -2.4 | 2.435E-09 | 1.078E-07 | 1.985   | 0.394 | 1.653   | 2.421   | 4.790   | 0.716 | 4.141   | 5.559   |
| 11978 | ENSG00000196422 | PPP1R26  | -1.1 | 0.0124    | 0.0433041 | 29.517  | 1.144 | 28.208  | 30.326  | 33.201  | 2.321 | 31.473  | 35.839  |
| 11981 | ENSG00000162148 | PPP1R32  | -1.2 | 0.0652657 | 0.1552595 | 3.723   | 0.682 | 3.199   | 4.494   | 4.675   | 0.295 | 4.335   | 4.868   |
| 11984 | ENSG00000160813 | PPP1R35  | -1.1 | 0.0594128 | 0.1445617 | 41.588  | 4.608 | 38.584  | 46.893  | 47.641  | 2.464 | 45.923  | 50.464  |
| 11985 | ENSG00000173281 | PPP1R3B  | -1.2 | 9.501E-05 | 0.0008672 | 42.415  | 1.922 | 41.027  | 44.608  | 50.014  | 0.692 | 49.403  | 50.765  |
| 11986 | ENSG00000235194 | PPP1R3E  | 1.2  | 0.0697784 | 0.1634121 | 3.454   | 0.524 | 2.849   | 3.786   | 3.008   | 0.214 | 2.771   | 3.185   |
| 11987 | ENSG00000049769 | PPP1R3F  | -1.2 | 0.0470518 | 0.1212904 | 4.673   | 0.463 | 4.356   | 5.204   | 5.656   | 1.081 | 4.912   | 6.896   |
| 11988 | ENSG00000115685 | PPP1R7   | 1.2  | 0.0007215 | 0.0044762 | 34.754  | 1.623 | 33.582  | 36.606  | 30.658  | 2.142 | 29.121  | 33.105  |
| 11989 | ENSG00000158528 | PPP1R9A  | 1.1  | 0.0484332 | 0.1239447 | 11.592  | 0.481 | 11.109  | 12.070  | 10.964  | 0.443 | 10.701  | 11.476  |
| 11990 | ENSG00000108819 | PPP1R9B  | -1.1 | 0.0494086 | 0.1258884 | 11.061  | 0.618 | 10.572  | 11.756  | 12.726  | 1.512 | 11.338  | 14.337  |
| 11994 | ENSG00000105568 | PPP2R1A  | -1.1 | 0.0033325 | 0.0153118 | 97.930  | 4.805 | 92.494  | 101.612 | 109.367 | 3.890 | 106.725 | 113.835 |
| 11995 | ENSG00000137713 | PPP2R1B  | 1.1  | 0.0218355 | 0.0675391 | 36.524  | 0.756 | 35.660  | 37.065  | 34.729  | 1.442 | 33.700  | 36.377  |
| 11996 | ENSG00000221914 | PPP2R2A  | -1.1 | 0.0991126 | 0.2120279 | 33.635  | 0.577 | 33.096  | 34.244  | 36.211  | 1.948 | 33.963  | 37.367  |
| 11997 | ENSG00000074211 | PPP2R2C  | 1.3  | 0.0002535 | 0.0019311 | 4.327   | 0.337 | 3.949   | 4.594   | 3.388   | 0.139 | 3.265   | 3.538   |
| 11999 | ENSG00000175470 | PPP2R2D  | -1.1 | 0.0148069 | 0.0499262 | 9.701   | 0.643 | 9.124   | 10.394  | 11.152  | 0.879 | 10.392  | 12.114  |
| 12000 | ENSG00000167393 | PPP2R3B  | -1.2 | 0.0004285 | 0.0029523 | 11.567  | 0.207 | 11.370  | 11.783  | 14.017  | 1.314 | 12.662  | 15.284  |
| 12001 | ENSG00000066027 | PPP2R5A  | 1.1  | 0.002322  | 0.0114462 | 54.842  | 1.098 | 53.577  | 55.542  | 50.528  | 1.225 | 49.655  | 51.929  |
| 12003 | ENSG00000112640 | PPP2R5D  | -1.2 | 3.701E-05 | 0.0003975 | 58.136  | 0.597 | 57.650  | 58.803  | 68.562  | 2.179 | 67.178  | 71.073  |
| 12004 | ENSG00000154001 | PPP2R5E  | -1.1 | 0.0039841 | 0.0177142 | 29.473  | 0.779 | 28.574  | 29.929  | 32.967  | 1.041 | 32.291  | 34.166  |
| 12005 | ENSG00000138814 | PPP3CA   | -1.1 | 0.0043166 | 0.018855  | 23.518  | 0.300 | 23.324  | 23.864  | 26.809  | 1.536 | 25.561  | 28.524  |
| 12008 | ENSG00000107758 | PPP3CB   | -1.1 | 0.024552  | 0.073914  | 27.183  | 1.633 | 25.738  | 28.955  | 30.273  | 0.292 | 29.999  | 30.580  |
| 12009 | ENSG00000120910 | PPP3CC   | 1.3  | 0.0024111 | 0.0117924 | 5.927   | 0.367 | 5.504   | 6.162   | 4.510   | 0.821 | 3.803   | 5.411   |
| 12012 | ENSG00000154845 | PPP4R1   | 1.1  | 0.0084032 | 0.0317309 | 33.853  | 0.089 | 33.760  | 33.938  | 31.696  | 2.353 | 28.981  | 33.142  |
| 12013 | ENSG00000163605 | PPP4R2   | -1.1 | 0.01385   | 0.0473607 | 51.558  | 2.382 | 48.954  | 53.626  | 57.782  | 4.207 | 54.030  | 62.331  |
| 12014 | ENSG00000100796 | PPP4R3A  | -1.2 | 9.824E-05 | 0.0008909 | 69.029  | 5.346 | 65.118  | 75.121  | 83.140  | 5.516 | 77.124  | 87.960  |
| 12015 | ENSG00000275052 | PPP4R3B  | -1.1 | 0.0777312 | 0.1773701 | 31.609  | 1.047 | 30.952  | 32.816  | 34.148  | 1.184 | 33.188  | 35.471  |
| 12018 | ENSG00000119698 | PPP4R4   | 1.2  | 5.883E-05 | 0.0005852 | 14.720  | 0.271 | 14.407  | 14.881  | 12.190  | 0.603 | 11.791  | 12.884  |
| 12019 | ENSG00000100239 | PPP6R2   | -1.2 | 0.0001496 | 0.0012567 | 22.425  | 1.447 | 21.005  | 23.898  | 26.970  | 1.206 | 26.217  | 28.362  |
| 12020 | ENSG00000110075 | PPP6R3   | -1.2 | 2.096E-05 | 0.0002474 | 64.275  | 3.011 | 61.514  | 67.485  | 75.977  | 3.310 | 72.199  | 78.370  |
| 12021 | ENSG00000131238 | PPT1     | 1.1  | 0.0005694 | 0.0037196 | 160.229 | 6.122 | 154.258 | 166.491 | 147.646 | 3.290 | 144.354 | 150.935 |
| 12022 | ENSG00000196850 | PPTC7    | -1.1 | 0.1231511 | 0.2476587 | 20.842  | 1.024 | 19.910  | 21.938  | 22.695  | 1.348 | 21.628  | 24.210  |
| 12024 | ENSG00000113593 | PPWD1    | -1.1 | 0.1233101 | 0.2478659 | 34.848  | 0.680 | 34.081  | 35.377  | 37.720  | 0.746 | 37.027  | 38.510  |
| 12025 | ENSG00000102103 | PQBP1    | -1.2 | 0.0038138 | 0.0170759 | 37.278  | 1.695 | 35.387  | 38.662  | 44.019  | 3.535 | 40.428  | 47.496  |
| 12026 | ENSG00000040487 | PQLC2    | 1.3  | 0.0007275 | 0.0045103 | 11.139  | 1.104 | 10.121  | 12.313  | 8.687   | 1.097 | 7.516   | 9.693   |
| 12027 | ENSG00000162976 | PQLC3    | 1.2  | 0.0099517 | 0.0363182 | 21.100  | 2.218 | 18.561  | 22.659  | 18.497  | 0.424 | 18.022  | 18.837  |
| 12030 | ENSG00000243279 | PRAF2    | -1.3 | 0.0113797 | 0.0404255 | 5.461   | 0.088 | 5.362   | 5.528   | 7.398   | 0.774 | 6.888   | 8.288   |
| 12031 | ENSG00000275342 | PRAG1    | 1.1  | 0.1207637 | 0.2440322 | 20.554  | 2.419 | 17.763  | 22.056  | 18.738  | 1.664 | 17.117  | 20.443  |
| 12032 | ENSG00000198901 | PRC1     | -1.2 | 5.66E-06  | 8.282E-05 | 57.745  | 1.830 | 56.235  | 59.779  | 70.371  | 5.519 | 65.240  | 76.209  |



|       | A               | B        | C    | D         | E         | F       | G      | H       | I       | J       | K      | L       | M       |
|-------|-----------------|----------|------|-----------|-----------|---------|--------|---------|---------|---------|--------|---------|---------|
| 12033 | ENSG00000143294 | PRCC     | -1.1 | 0.0800273 | 0.1812886 | 28.711  | 1.215  | 27.853  | 30.102  | 31.472  | 2.472  | 28.693  | 33.427  |
| 12037 | ENSG00000170325 | PRDM10   | -1.3 | 1.56E-05  | 0.0001924 | 7.855   | 0.482  | 7.536   | 8.409   | 10.225  | 0.656  | 9.469   | 10.654  |
| 12039 | ENSG00000019485 | PRDM11   | 1.1  | 0.0725088 | 0.1682826 | 2.915   | 0.297  | 2.584   | 3.158   | 2.659   | 0.060  | 2.610   | 2.726   |
| 12040 | ENSG00000147596 | PRDM14   | -1.5 | 4.20E-11  | 3.022E-09 | 28.777  | 1.184  | 27.870  | 30.116  | 44.905  | 4.163  | 42.445  | 49.711  |
| 12041 | ENSG00000141956 | PRDM15   | -1.2 | 0.0009502 | 0.0056111 | 4.348   | 0.322  | 4.090   | 4.709   | 5.317   | 0.220  | 5.064   | 5.454   |
| 12044 | ENSG00000138738 | PRDM5    | -1.1 | 0.0318266 | 0.0904373 | 15.733  | 0.953  | 15.138  | 16.832  | 17.680  | 1.531  | 15.975  | 18.939  |
| 12045 | ENSG00000123131 | PRDX4    | -1.1 | 0.0002126 | 0.0016724 | 176.680 | 7.619  | 171.364 | 185.409 | 202.843 | 3.790  | 198.937 | 206.506 |
| 12046 | ENSG00000126432 | PRDX5    | 1.1  | 4.794E-05 | 0.000495  | 493.446 | 12.664 | 485.095 | 508.017 | 440.926 | 16.668 | 425.237 | 458.425 |
| 12048 | ENSG00000117592 | PRDX6    | 1.2  | 1.905E-07 | 4.773E-06 | 433.249 | 12.598 | 421.086 | 446.240 | 380.071 | 4.799  | 377.276 | 385.612 |
| 12049 | ENSG00000138073 | PREB     | -1.2 | 0.0009007 | 0.0053567 | 32.807  | 1.864  | 30.685  | 34.182  | 38.639  | 2.104  | 36.209  | 39.865  |
| 12050 | ENSG00000169230 | PRELID1  | -1.1 | 0.0031065 | 0.014507  | 137.208 | 0.765  | 136.325 | 137.680 | 154.140 | 3.530  | 151.400 | 158.123 |
| 12051 | ENSG00000186314 | PRELID2  | 1.4  | 0.0010845 | 0.0062815 | 3.731   | 0.860  | 2.747   | 4.343   | 2.733   | 0.186  | 2.546   | 2.918   |
| 12052 | ENSG00000101166 | PRELID3B | -1.1 | 0.0596507 | 0.1450362 | 64.612  | 2.370  | 62.828  | 67.301  | 71.119  | 1.819  | 69.929  | 73.213  |
| 12053 | ENSG00000138078 | PREPL    | 1.2  | 1.311E-08 | 4.696E-07 | 44.764  | 0.535  | 44.432  | 45.382  | 36.900  | 0.857  | 36.382  | 37.889  |
| 12054 | ENSG00000124126 | PREX1    | -1.1 | 0.0332261 | 0.0933194 | 15.580  | 0.483  | 15.268  | 16.136  | 17.473  | 1.398  | 16.427  | 19.061  |
| 12056 | ENSG00000046889 | PREX2    | -1.2 | 1.355E-05 | 0.0001726 | 11.415  | 0.456  | 11.108  | 11.938  | 13.793  | 0.162  | 13.678  | 13.979  |
| 12059 | ENSG00000139174 | PRICKLE1 | -1.3 | 2.374E-07 | 5.719E-06 | 10.082  | 0.346  | 9.727   | 10.419  | 13.553  | 0.909  | 12.504  | 14.091  |
| 12062 | ENSG00000164306 | PRIMPOL  | 1.3  | 0.0059734 | 0.0242972 | 8.389   | 0.908  | 7.379   | 9.140   | 6.754   | 0.896  | 5.721   | 7.320   |
| 12063 | ENSG00000132356 | PRKAA1   | -1.1 | 0.0743524 | 0.1713246 | 17.855  | 0.264  | 17.582  | 18.110  | 19.654  | 0.329  | 19.376  | 20.018  |
| 12064 | ENSG00000111725 | PRKAB1   | -1.1 | 0.0846534 | 0.189382  | 13.565  | 0.351  | 13.222  | 13.923  | 14.938  | 0.685  | 14.321  | 15.675  |
| 12066 | ENSG00000131791 | PRKAB2   | -1.1 | 0.074984  | 0.1724744 | 51.719  | 3.882  | 48.665  | 56.088  | 56.411  | 4.444  | 52.648  | 61.314  |
| 12069 | ENSG00000142875 | PRKACB   | 1.1  | 0.0060197 | 0.0244265 | 16.931  | 0.481  | 16.618  | 17.485  | 15.392  | 0.422  | 15.102  | 15.876  |
| 12071 | ENSG00000181929 | PRKAG1   | 1.1  | 0.0144107 | 0.0489119 | 28.973  | 1.826  | 27.272  | 30.902  | 26.708  | 1.436  | 25.060  | 27.692  |
| 12072 | ENSG00000106617 | PRKAG2   | 1.3  | 6.943E-06 | 9.745E-05 | 11.750  | 0.605  | 11.201  | 12.399  | 9.302   | 0.946  | 8.226   | 10.003  |
| 12073 | ENSG00000108946 | PRKAR1A  | 1.1  | 0.0147546 | 0.0497794 | 67.913  | 1.045  | 66.733  | 68.726  | 64.672  | 1.860  | 62.527  | 65.845  |
| 12074 | ENSG00000188191 | PRKAR1B  | 1.3  | 0.001418  | 0.007734  | 14.085  | 0.666  | 13.545  | 14.829  | 11.432  | 1.688  | 9.699   | 13.071  |
| 12082 | ENSG00000005249 | PRKAR2B  | 1.2  | 8.257E-08 | 2.308E-06 | 45.747  | 0.726  | 45.199  | 46.571  | 37.566  | 1.293  | 36.214  | 38.792  |
| 12083 | ENSG00000166501 | PRKCB    | 1.2  | 0.0058968 | 0.0240724 | 9.465   | 0.508  | 8.885   | 9.833   | 8.242   | 1.252  | 6.967   | 9.469   |
| 12084 | ENSG00000171132 | PRKCE    | -1.5 | 0.0297428 | 0.085682  | 0.289   | 0.069  | 0.224   | 0.361   | 0.433   | 0.042  | 0.387   | 0.470   |
| 12085 | ENSG00000126583 | PRKCG    | -1.2 | 0.0354582 | 0.097784  | 9.264   | 0.409  | 8.792   | 9.518   | 10.926  | 1.167  | 9.600   | 11.797  |
| 12086 | ENSG00000130175 | PRKCSH   | -1.1 | 0.0264498 | 0.0782073 | 97.420  | 3.829  | 93.343  | 100.938 | 106.558 | 3.867  | 103.472 | 110.896 |
| 12087 | ENSG00000067606 | PRKCZ    | -1.1 | 0.0443547 | 0.1158206 | 10.960  | 0.212  | 10.757  | 11.180  | 12.192  | 0.173  | 12.084  | 12.392  |
| 12088 | ENSG00000184304 | PRKD1    | -1.3 | 0.0119008 | 0.0419417 | 1.599   | 0.145  | 1.509   | 1.766   | 2.149   | 0.283  | 1.946   | 2.472   |
| 12090 | ENSG00000105287 | PRKD2    | -1.1 | 0.0221504 | 0.0681905 | 21.312  | 0.835  | 20.572  | 22.218  | 23.966  | 1.343  | 23.014  | 25.502  |
| 12091 | ENSG00000253729 | PRKDC    | -1.1 | 0.0045094 | 0.0195357 | 148.479 | 1.981  | 146.221 | 149.925 | 162.046 | 1.750  | 160.295 | 163.794 |
| 12092 | ENSG00000185532 | PRKG1    | -1.1 | 0.0180951 | 0.0583383 | 14.480  | 0.444  | 13.984  | 14.839  | 16.300  | 0.216  | 16.167  | 16.550  |
| 12093 | ENSG00000138669 | PRKG2    | 1.3  | 0.0102432 | 0.0371767 | 3.821   | 0.162  | 3.640   | 3.954   | 3.111   | 0.350  | 2.903   | 3.516   |
| 12094 | ENSG00000180228 | PRKRA    | -1.1 | 0.097931  | 0.2100822 | 39.108  | 1.350  | 37.577  | 40.124  | 42.624  | 3.781  | 39.800  | 46.920  |
| 12095 | ENSG00000183943 | PRKX     | -1   | 0.1141848 | 0.2342562 | 85.927  | 0.779  | 85.150  | 86.708  | 91.608  | 1.906  | 89.468  | 93.122  |
| 12096 | ENSG00000126457 | PRMT1    | -1.1 | 0.000738  | 0.0045612 | 172.515 | 4.081  | 168.379 | 176.539 | 192.745 | 6.629  | 186.337 | 199.575 |
| 12097 | ENSG00000185238 | PRMT3    | 1.2  | 1.352E-06 | 2.452E-05 | 28.246  | 1.527  | 27.252  | 30.004  | 23.342  | 0.452  | 23.017  | 23.859  |
| 12098 | ENSG00000198890 | PRMT6    | 1.2  | 0.0003303 | 0.0023819 | 37.063  | 1.739  | 35.424  | 38.887  | 32.219  | 0.313  | 31.897  | 32.523  |
| 12100 | ENSG00000132600 | PRMT7    | 1.1  | 0.0063268 | 0.0253867 | 9.021   | 0.423  | 8.544   | 9.351   | 8.075   | 0.738  | 7.234   | 8.615   |

|       | A               | B       | C    | D         | E         | F       | G      | H       | I       | J       | K      | L       | M       |
|-------|-----------------|---------|------|-----------|-----------|---------|--------|---------|---------|---------|--------|---------|---------|
| 12104 | ENSG00000164169 | PRMT9   | 1.1  | 0.1030335 | 0.217852  | 15.086  | 0.287  | 14.842  | 15.403  | 14.232  | 0.877  | 13.640  | 15.239  |
| 12105 | ENSG00000171867 | PRNP    | 1.7  | 1.63E-14  | 2.84E-12  | 49.255  | 4.876  | 44.366  | 54.117  | 29.112  | 2.009  | 27.018  | 31.024  |
| 12108 | ENSG00000101000 | PROCR   | 1.1  | 0.0506398 | 0.1282719 | 36.765  | 0.896  | 35.753  | 37.458  | 33.887  | 2.295  | 32.232  | 36.507  |
| 12109 | ENSG00000100033 | PRODH   | 1.2  | 8.29E-06  | 0.0001136 | 22.692  | 1.847  | 20.559  | 23.764  | 18.906  | 1.210  | 17.528  | 19.793  |
| 12110 | ENSG00000163421 | PROK2   | 1.3  | 0.1131759 | 0.2329776 | 3.403   | 0.906  | 2.748   | 4.436   | 2.687   | 0.838  | 1.843   | 3.520   |
| 12111 | ENSG00000007062 | PROM1   | 1.2  | 8.328E-08 | 2.324E-06 | 30.392  | 0.343  | 30.089  | 30.764  | 25.207  | 1.062  | 24.191  | 26.310  |
| 12113 | ENSG00000155066 | PROM2   | -1.2 | 0.0109522 | 0.0392279 | 3.639   | 0.647  | 3.244   | 4.386   | 4.648   | 0.652  | 4.175   | 5.391   |
| 12114 | ENSG00000162997 | PRORS1P | -1.2 | 0.0635139 | 0.1522189 | 4.770   | 0.326  | 4.394   | 4.960   | 5.913   | 0.637  | 5.225   | 6.483   |
| 12117 | ENSG00000184500 | PROS1   | 1.5  | 0.0004032 | 0.0028134 | 3.416   | 0.370  | 2.994   | 3.684   | 2.293   | 0.585  | 1.624   | 2.713   |
| 12118 | ENSG00000148426 | PROSER2 | 1.2  | 0.0771557 | 0.1763186 | 3.896   | 0.459  | 3.386   | 4.275   | 3.379   | 0.034  | 3.349   | 3.416   |
| 12119 | ENSG00000117707 | PROX1   | -2   | 6.423E-05 | 0.0006298 | 0.382   | 0.076  | 0.298   | 0.447   | 0.791   | 0.206  | 0.661   | 1.028   |
| 12120 | ENSG00000110107 | PRPF19  | 1.1  | 0.0341104 | 0.0952152 | 91.289  | 4.630  | 86.813  | 96.058  | 86.683  | 5.230  | 80.976  | 91.247  |
| 12121 | ENSG00000117360 | PRPF3   | -1.2 | 6.086E-05 | 0.0006027 | 27.779  | 1.296  | 26.820  | 29.254  | 33.542  | 2.128  | 31.433  | 35.688  |
| 12122 | ENSG00000185246 | PRPF39  | 1.3  | 7.943E-09 | 3.039E-07 | 43.449  | 1.827  | 41.432  | 44.993  | 33.072  | 2.835  | 31.232  | 36.337  |
| 12123 | ENSG00000136875 | PRPF4   | -1.1 | 0.0005966 | 0.0038672 | 34.712  | 0.581  | 34.326  | 35.380  | 40.427  | 0.543  | 39.825  | 40.879  |
| 12124 | ENSG00000110844 | PRPF40B | -1.2 | 0.0004335 | 0.0029801 | 8.233   | 0.414  | 7.951   | 8.708   | 10.040  | 0.411  | 9.787   | 10.514  |
| 12125 | ENSG00000101161 | PRPF6   | 1.1  | 0.10784   | 0.2253952 | 85.337  | 1.124  | 84.596  | 86.631  | 82.901  | 4.451  | 79.003  | 87.751  |
| 12126 | ENSG00000174231 | PRPF8   | -1.1 | 0.0048002 | 0.0205171 | 117.628 | 5.922  | 110.912 | 122.101 | 130.302 | 6.816  | 124.691 | 137.887 |
| 12127 | ENSG00000147224 | PRPS1   | -1.1 | 1.268E-05 | 0.0001635 | 183.081 | 0.875  | 182.572 | 184.091 | 213.169 | 0.902  | 212.583 | 214.208 |
| 12128 | ENSG00000161542 | PRPSAP1 | -1.1 | 0.0239985 | 0.0726353 | 15.007  | 0.628  | 14.286  | 15.437  | 16.890  | 1.284  | 15.443  | 17.894  |
| 12129 | ENSG00000068489 | PRR11   | -1.2 | 2.574E-08 | 8.466E-07 | 55.734  | 3.027  | 53.085  | 59.034  | 71.059  | 2.704  | 67.944  | 72.795  |
| 12133 | ENSG00000126464 | PRR12   | -1.3 | 7.178E-05 | 0.0006898 | 16.256  | 0.548  | 15.924  | 16.888  | 21.066  | 3.241  | 19.082  | 24.806  |
| 12134 | ENSG00000156858 | PRR14   | -1.3 | 0.0116481 | 0.0412537 | 4.032   | 0.720  | 3.598   | 4.863   | 5.182   | 0.314  | 4.886   | 5.510   |
| 12135 | ENSG00000183530 | PRR14L  | -1.1 | 0.0028688 | 0.013572  | 24.877  | 0.571  | 24.318  | 25.459  | 28.149  | 1.417  | 27.007  | 29.734  |
| 12138 | ENSG00000176532 | PRR15   | 1.4  | 0.0025423 | 0.0123345 | 9.213   | 1.197  | 7.968   | 10.354  | 6.869   | 0.808  | 6.062   | 7.679   |
| 12139 | ENSG00000183248 | PRR36   | -1.2 | 0.0964716 | 0.2078766 | 9.819   | 0.579  | 9.211   | 10.365  | 12.205  | 2.852  | 10.262  | 15.478  |
| 12142 | ENSG00000186654 | PRR5    | -1.3 | 0.0182982 | 0.0588806 | 2.465   | 0.103  | 2.357   | 2.562   | 3.200   | 0.647  | 2.457   | 3.636   |
| 12143 | ENSG00000135362 | PRR5L   | 1.7  | 6.152E-08 | 1.773E-06 | 5.554   | 0.947  | 4.463   | 6.163   | 3.431   | 0.229  | 3.168   | 3.582   |
| 12144 | ENSG00000164244 | PRRC1   | -1.1 | 0.0234402 | 0.0714055 | 31.252  | 1.440  | 29.817  | 32.697  | 34.486  | 0.970  | 33.411  | 35.296  |
| 12146 | ENSG00000204469 | PRRC2A  | -1.1 | 0.001613  | 0.0085953 | 122.356 | 5.464  | 116.091 | 126.134 | 139.439 | 10.498 | 133.338 | 151.560 |
| 12148 | ENSG00000130723 | PRRC2B  | -1.2 | 2.38E-05  | 0.0002757 | 66.371  | 4.316  | 61.417  | 69.318  | 78.751  | 4.245  | 74.684  | 83.155  |
| 12149 | ENSG00000117523 | PRRC2C  | -1.1 | 0.0149277 | 0.0502433 | 85.959  | 1.723  | 84.922  | 87.948  | 93.627  | 0.801  | 93.018  | 94.534  |
| 12152 | ENSG00000130962 | PRRG1   | -1.2 | 9.167E-05 | 0.0008422 | 9.340   | 0.213  | 9.150   | 9.571   | 11.925  | 0.235  | 11.693  | 12.163  |
| 12153 | ENSG00000135378 | PRRG4   | 1.2  | 0.0566447 | 0.1395125 | 2.447   | 0.131  | 2.296   | 2.538   | 2.067   | 0.113  | 1.938   | 2.143   |
| 12154 | ENSG00000167371 | PRRT2   | -1.4 | 8.931E-06 | 0.000121  | 5.392   | 0.279  | 5.115   | 5.674   | 7.945   | 0.319  | 7.734   | 8.311   |
| 12155 | ENSG00000150687 | PRSS23  | 1.8  | 6.75E-09  | 2.655E-07 | 2.479   | 0.268  | 2.224   | 2.758   | 1.408   | 0.135  | 1.281   | 1.550   |
| 12157 | ENSG00000206549 | PRSS50  | 1.5  | 0.0515145 | 0.1298845 | 1.701   | 0.143  | 1.560   | 1.847   | 1.196   | 0.130  | 1.049   | 1.297   |
| 12158 | ENSG00000151006 | PRSS53  | -1.9 | 0.0005816 | 0.0037888 | 0.422   | 0.082  | 0.349   | 0.510   | 0.839   | 0.187  | 0.706   | 1.052   |
| 12159 | ENSG00000052344 | PRSS8   | 1.1  | 0.0003128 | 0.0022846 | 113.071 | 2.520  | 110.169 | 114.707 | 102.670 | 3.603  | 100.520 | 106.829 |
| 12160 | ENSG00000106772 | PRUNE2  | 2    | 5.37E-17  | 1.65E-14  | 8.322   | 0.474  | 7.777   | 8.641   | 4.275   | 0.512  | 3.688   | 4.623   |
| 12161 | ENSG00000197746 | PSAP    | 1.1  | 0.0023795 | 0.0116821 | 560.561 | 7.523  | 551.879 | 565.142 | 532.164 | 13.891 | 521.270 | 547.807 |
| 12162 | ENSG00000135069 | PSAT1   | 1.8  | 1.99E-22  | 2.10E-19  | 571.533 | 20.470 | 548.809 | 588.528 | 328.796 | 17.383 | 309.428 | 343.041 |

|       | A               | B       | C    | D         | E         | F       | G      | H       | I       | J       | K      | L       | M       |
|-------|-----------------|---------|------|-----------|-----------|---------|--------|---------|---------|---------|--------|---------|---------|
| 12163 | ENSG00000230787 | PSAT1P3 | 1.7  | 0.0050968 | 0.0214595 | 4.015   | 0.066  | 3.967   | 4.090   | 2.344   | 1.100  | 1.427   | 3.564   |
| 12166 | ENSG00000059915 | PSD     | -1.4 | 0.0003721 | 0.0026322 | 2.322   | 0.177  | 2.168   | 2.515   | 3.334   | 0.169  | 3.234   | 3.529   |
| 12167 | ENSG00000156011 | PSD3    | -1.1 | 0.0726318 | 0.1685077 | 6.517   | 0.414  | 6.056   | 6.856   | 7.266   | 0.263  | 7.094   | 7.569   |
| 12168 | ENSG00000125637 | PSD4    | 1.8  | 0.0001472 | 0.0012381 | 0.705   | 0.138  | 0.571   | 0.846   | 0.406   | 0.099  | 0.337   | 0.520   |
| 12169 | ENSG00000080815 | PSEN1   | 1.1  | 0.0057805 | 0.0237065 | 18.106  | 0.597  | 17.494  | 18.688  | 16.770  | 0.560  | 16.123  | 17.112  |
| 12170 | ENSG00000143801 | PSEN2   | 1.5  | 5.713E-08 | 1.672E-06 | 16.898  | 1.465  | 15.308  | 18.192  | 11.783  | 0.992  | 10.675  | 12.589  |
| 12171 | ENSG00000164985 | PSIP1   | 1.1  | 0.0278605 | 0.0814951 | 272.123 | 2.417  | 270.195 | 274.834 | 262.114 | 10.161 | 253.857 | 273.461 |
| 12172 | ENSG00000159792 | PSKH1   | -1.1 | 0.0083451 | 0.0315679 | 20.271  | 1.124  | 19.614  | 21.569  | 23.467  | 1.229  | 22.336  | 24.775  |
| 12173 | ENSG00000229083 | PSMA6P2 | 1.4  | 0.0089442 | 0.0332777 | 10.973  | 1.281  | 9.882   | 12.383  | 7.794   | 0.836  | 6.840   | 8.393   |
| 12174 | ENSG00000008018 | PSMB1   | -1.1 | 0.0331917 | 0.0932665 | 209.028 | 7.359  | 202.015 | 216.690 | 226.431 | 3.205  | 223.992 | 230.061 |
| 12175 | ENSG00000126067 | PSMB2   | -1.1 | 0.0501039 | 0.1271428 | 76.446  | 2.146  | 74.908  | 78.898  | 82.621  | 1.980  | 81.154  | 84.874  |
| 12177 | ENSG00000277791 | PSMB3   | -1.1 | 0.0371173 | 0.1010643 | 196.595 | 6.140  | 189.801 | 201.748 | 214.132 | 1.213  | 213.042 | 215.438 |
| 12180 | ENSG00000100804 | PSMB5   | -1.1 | 0.0630632 | 0.1514179 | 212.185 | 1.437  | 210.885 | 213.728 | 228.279 | 7.007  | 223.524 | 236.326 |
| 12182 | ENSG00000142507 | PSMB6   | -1.1 | 0.036801  | 0.1004784 | 253.870 | 8.532  | 244.103 | 259.871 | 275.700 | 3.516  | 273.151 | 279.711 |
| 12185 | ENSG00000204264 | PSMB8   | 1.2  | 0.0004978 | 0.0033452 | 27.316  | 1.801  | 25.994  | 29.367  | 22.753  | 1.308  | 21.522  | 24.126  |
| 12189 | ENSG00000240065 | PSMB9   | 1.4  | 0.0195896 | 0.0619752 | 2.412   | 0.252  | 2.164   | 2.667   | 1.738   | 0.340  | 1.466   | 2.119   |
| 12190 | ENSG00000241506 | PSMC1P1 | 1.1  | 0.0069902 | 0.0274815 | 181.283 | 6.432  | 175.192 | 188.009 | 169.262 | 4.659  | 166.296 | 174.632 |
| 12192 | ENSG00000165916 | PSMC3   | 1    | 0.1185881 | 0.2408016 | 121.937 | 0.514  | 121.450 | 122.475 | 119.168 | 3.413  | 116.748 | 123.071 |
| 12193 | ENSG00000013275 | PSMC4   | 1.1  | 0.0005133 | 0.0034307 | 92.456  | 0.949  | 91.501  | 93.399  | 84.140  | 2.705  | 81.031  | 85.964  |
| 12194 | ENSG00000100519 | PSMC6   | -1.1 | 0.061458  | 0.1482432 | 28.345  | 1.791  | 26.935  | 30.360  | 30.963  | 1.330  | 29.428  | 31.796  |
| 12199 | ENSG00000185627 | PSMD13  | -1.1 | 0.0263356 | 0.0779897 | 60.008  | 1.040  | 59.288  | 61.201  | 65.497  | 1.702  | 64.374  | 67.455  |
| 12201 | ENSG00000175166 | PSMD2   | 1.1  | 0.0135745 | 0.0465973 | 131.616 | 3.250  | 128.570 | 135.037 | 125.733 | 5.687  | 119.174 | 129.310 |
| 12209 | ENSG00000108344 | PSMD3   | -1.1 | 0.0006011 | 0.0038845 | 79.264  | 0.723  | 78.433  | 79.745  | 89.658  | 2.738  | 86.597  | 91.873  |
| 12210 | ENSG00000159352 | PSMD4   | 1.1  | 0.0125373 | 0.0436842 | 109.555 | 0.508  | 109.063 | 110.078 | 103.556 | 4.460  | 99.129  | 108.048 |
| 12211 | ENSG00000163636 | PSMD6   | -1.1 | 0.0984974 | 0.2110053 | 31.161  | 0.396  | 30.865  | 31.611  | 33.448  | 0.120  | 33.327  | 33.568  |
| 12213 | ENSG00000103035 | PSMD7   | -1.1 | 0.038632  | 0.1040916 | 169.956 | 10.725 | 162.850 | 182.293 | 184.619 | 2.488  | 182.199 | 187.169 |
| 12214 | ENSG00000099341 | PSMD8   | 1.1  | 0.0112912 | 0.0401699 | 93.713  | 2.109  | 91.654  | 95.869  | 88.257  | 3.614  | 86.102  | 92.429  |
| 12217 | ENSG00000092010 | PSME1   | 1.1  | 0.0383943 | 0.1035832 | 76.075  | 1.769  | 74.113  | 77.546  | 71.637  | 4.017  | 67.654  | 75.688  |
| 12220 | ENSG00000131467 | PSME3   | 1    | 0.1247055 | 0.2499875 | 68.537  | 1.748  | 67.523  | 70.555  | 67.080  | 1.505  | 65.472  | 68.455  |
| 12221 | ENSG00000183527 | PSMG1   | 1.2  | 5.137E-05 | 0.0005231 | 52.092  | 3.172  | 48.457  | 54.303  | 44.528  | 0.717  | 43.717  | 45.077  |
| 12222 | ENSG00000128789 | PSMG2   | -1.1 | 0.034267  | 0.0954137 | 43.087  | 1.494  | 41.375  | 44.126  | 47.492  | 1.251  | 46.090  | 48.496  |
| 12224 | ENSG00000121390 | PSPC1   | 1.2  | 6.821E-05 | 0.0006611 | 28.868  | 1.156  | 27.565  | 29.771  | 25.047  | 1.015  | 24.416  | 26.218  |
| 12226 | ENSG00000227879 | PSPC1P1 | 1.3  | 0.11853   | 0.240801  | 6.184   | 1.259  | 4.967   | 7.480   | 4.815   | 0.929  | 4.017   | 5.835   |
| 12227 | ENSG00000146733 | PSPH    | 1.6  | 4.65E-13  | 5.38E-11  | 42.777  | 0.407  | 42.532  | 43.247  | 28.067  | 1.527  | 26.764  | 29.748  |
| 12228 | ENSG00000134222 | PSRC1   | -1.2 | 0.0005315 | 0.003518  | 50.616  | 3.110  | 47.970  | 54.042  | 59.547  | 3.466  | 56.082  | 63.014  |
| 12230 | ENSG00000152229 | PSTPIP2 | 1.2  | 0.0060211 | 0.0244265 | 7.850   | 0.224  | 7.669   | 8.100   | 6.578   | 0.428  | 6.093   | 6.898   |
| 12231 | ENSG00000169403 | PTAFR   | 1.2  | 0.058729  | 0.1432501 | 3.220   | 0.254  | 2.976   | 3.482   | 2.777   | 0.044  | 2.739   | 2.825   |
| 12233 | ENSG00000188647 | PTAR1   | 1.1  | 0.09455   | 0.2053318 | 82.953  | 3.633  | 79.220  | 86.476  | 79.510  | 6.927  | 73.704  | 87.178  |
| 12234 | ENSG00000011304 | PTBP1   | -1.4 | 3.43E-14  | 5.42E-12  | 123.155 | 2.041  | 120.879 | 124.821 | 175.943 | 12.526 | 162.565 | 187.392 |
| 12235 | ENSG00000117569 | PTBP2   | -1.7 | 2.26E-16  | 6.17E-14  | 12.846  | 0.704  | 12.128  | 13.535  | 22.788  | 2.138  | 20.767  | 25.026  |
| 12236 | ENSG00000119314 | PTBP3   | -1.1 | 0.0379596 | 0.1028038 | 82.363  | 2.766  | 80.342  | 85.515  | 89.347  | 3.821  | 84.935  | 91.611  |
| 12237 | ENSG00000106246 | PTCD1   | -1.3 | 0.0058467 | 0.0239149 | 1.828   | 0.190  | 1.617   | 1.984   | 2.473   | 0.223  | 2.220   | 2.640   |
| 12238 | ENSG00000049883 | PTCD2   | 1.1  | 0.110448  | 0.2291189 | 6.912   | 0.325  | 6.622   | 7.263   | 6.539   | 0.110  | 6.419   | 6.635   |

|       | A               | B         | C    | D         | E         | F        | G       | H        | I        | J        | K       | L        | M        |
|-------|-----------------|-----------|------|-----------|-----------|----------|---------|----------|----------|----------|---------|----------|----------|
| 12242 | ENSG00000165186 | PTCHD1    | -1.5 | 1.606E-06 | 2.809E-05 | 1.854    | 0.289   | 1.662    | 2.185    | 2.860    | 0.295   | 2.525    | 3.079    |
| 12245 | ENSG00000171862 | PTEN      | -1.1 | 0.0019497 | 0.0099713 | 12.034   | 0.566   | 11.662   | 12.685   | 14.033   | 0.644   | 13.336   | 14.605   |
| 12247 | ENSG00000237984 | PTENP1    | -1.2 | 0.0161005 | 0.0534353 | 8.743    | 0.416   | 8.411    | 9.209    | 10.425   | 0.504   | 9.883    | 10.879   |
| 12249 | ENSG00000148334 | PTGES2    | -1.1 | 0.122818  | 0.2471998 | 33.617   | 1.122   | 32.377   | 34.562   | 36.777   | 3.918   | 34.102   | 41.274   |
| 12251 | ENSG00000110958 | PTGES3    | -1.1 | 0.0080951 | 0.0308716 | 380.299  | 1.172   | 379.296  | 381.587  | 417.092  | 17.905  | 399.793  | 435.547  |
| 12254 | ENSG00000267060 | PTGES3L   | 1.3  | 0.1242047 | 0.2492494 | 1.313    | 0.281   | 1.043    | 1.604    | 1.009    | 0.191   | 0.870    | 1.227    |
| 12255 | ENSG00000234518 | PTGES3P1  | -1.1 | 0.0534111 | 0.1335568 | 345.608  | 13.131  | 336.709  | 360.689  | 378.771  | 24.200  | 356.026  | 404.202  |
| 12256 | ENSG00000124212 | PTGIS     | -1.1 | 0.0467721 | 0.1206798 | 38.303   | 1.339   | 37.106   | 39.750   | 42.078   | 3.315   | 38.679   | 45.302   |
| 12257 | ENSG00000106853 | PTGR1     | 1.1  | 0.0700764 | 0.164019  | 45.184   | 1.586   | 43.415   | 46.480   | 43.136   | 1.446   | 42.253   | 44.805   |
| 12258 | ENSG00000095303 | PTGS1     | -1.6 | 0.0082741 | 0.0313839 | 0.605    | 0.152   | 0.463    | 0.765    | 0.979    | 0.181   | 0.865    | 1.189    |
| 12259 | ENSG00000169398 | PTK2      | -1.1 | 0.0351483 | 0.0972777 | 42.655   | 1.757   | 41.019   | 44.513   | 46.082   | 0.573   | 45.711   | 46.742   |
| 12261 | ENSG00000187514 | PTMA      | 1.1  | 0.0154335 | 0.0516067 | 1446.324 | 137.896 | 1290.869 | 1553.895 | 1362.753 | 25.081  | 1341.157 | 1390.262 |
| 12263 | ENSG00000197744 | PTMAP2    | 1.1  | 0.0444987 | 0.1160715 | 2450.028 | 251.281 | 2175.805 | 2669.257 | 2283.167 | 106.426 | 2195.660 | 2401.642 |
| 12264 | ENSG00000214182 | PTMAP5    | 1.1  | 0.0248939 | 0.0747333 | 641.074  | 73.700  | 560.939  | 705.952  | 575.465  | 23.820  | 552.058  | 599.678  |
| 12265 | ENSG00000104960 | PTOV1     | -1.1 | 0.0543257 | 0.1353773 | 51.773   | 2.505   | 48.885   | 53.339   | 56.517   | 1.901   | 55.066   | 58.669   |
| 12266 | ENSG00000268006 | PTOV1-AS1 | -1.2 | 0.1136955 | 0.2335924 | 2.984    | 0.364   | 2.566    | 3.226    | 3.613    | 0.462   | 3.237    | 4.129    |
| 12267 | ENSG00000112245 | PTP4A1    | 1.1  | 0.04154   | 0.1100684 | 84.512   | 4.640   | 79.909   | 89.188   | 79.831   | 4.213   | 75.124   | 83.249   |
| 12268 | ENSG00000184007 | PTP4A2    | 1.2  | 1.01E-09  | 4.908E-08 | 95.352   | 0.597   | 94.723   | 95.912   | 78.205   | 2.234   | 75.708   | 80.012   |
| 12269 | ENSG00000196396 | PTPN1     | -1.1 | 0.0006032 | 0.003897  | 32.943   | 1.330   | 31.422   | 33.882   | 38.523   | 0.888   | 37.547   | 39.284   |
| 12271 | ENSG00000127947 | PTPN12    | 1.1  | 0.0292977 | 0.0847028 | 74.491   | 4.053   | 71.149   | 78.999   | 70.863   | 5.270   | 66.073   | 76.509   |
| 12272 | ENSG00000163629 | PTPN13    | 1.1  | 0.0070915 | 0.0277894 | 44.898   | 1.368   | 43.569   | 46.302   | 42.430   | 0.360   | 42.014   | 42.641   |
| 12273 | ENSG00000070778 | PTPN21    | 1.3  | 3.872E-06 | 5.953E-05 | 8.746    | 0.261   | 8.564    | 9.045    | 6.743    | 0.510   | 6.154    | 7.040    |
| 12275 | ENSG00000076201 | PTPN23    | -1.1 | 0.0175438 | 0.0568534 | 22.135   | 0.814   | 21.564   | 23.066   | 25.077   | 2.725   | 22.616   | 28.006   |
| 12276 | ENSG00000228196 | PTPN2P1   | -1.3 | 0.0835496 | 0.1877092 | 4.605    | 0.488   | 4.272    | 5.165    | 5.965    | 0.250   | 5.682    | 6.157    |
| 12277 | ENSG00000070159 | PTPN3     | 1.3  | 0.0013031 | 0.0072475 | 3.236    | 0.231   | 2.971    | 3.399    | 2.626    | 0.064   | 2.564    | 2.691    |
| 12278 | ENSG00000088179 | PTPN4     | 1.3  | 4.195E-09 | 1.748E-07 | 24.699   | 1.218   | 23.375   | 25.771   | 19.869   | 0.537   | 19.367   | 20.435   |
| 12279 | ENSG00000110786 | PTPN5     | -1.2 | 0.0003272 | 0.0023677 | 6.566    | 0.088   | 6.504    | 6.667    | 8.366    | 0.424   | 8.052    | 8.848    |
| 12281 | ENSG00000169410 | PTPN9     | 1.1  | 0.0195236 | 0.0618125 | 20.201   | 0.517   | 19.693   | 20.727   | 18.848   | 1.677   | 17.038   | 20.347   |
| 12282 | ENSG00000153707 | PTPRD     | 1.1  | 0.0551126 | 0.1368951 | 19.545   | 1.098   | 18.711   | 20.788   | 18.735   | 0.485   | 18.305   | 19.261   |
| 12283 | ENSG00000132334 | PTPRE     | -1.6 | 0.0031199 | 0.0145485 | 0.365    | 0.054   | 0.302    | 0.398    | 0.593    | 0.067   | 0.543    | 0.668    |
| 12285 | ENSG00000142949 | PTPRF     | -1.2 | 1.171E-06 | 2.161E-05 | 89.294   | 4.143   | 84.559   | 92.253   | 107.187  | 4.996   | 102.450  | 112.408  |
| 12286 | ENSG00000144724 | PTPRG     | -1.1 | 0.027062  | 0.0796277 | 44.561   | 4.774   | 41.613   | 50.069   | 49.890   | 2.987   | 46.858   | 52.830   |
| 12287 | ENSG00000080031 | PTPRH     | 1.6  | 0.0437407 | 0.1145891 | 0.750    | 0.093   | 0.646    | 0.823    | 0.478    | 0.105   | 0.358    | 0.540    |
| 12290 | ENSG00000149177 | PTPRJ     | -1.1 | 0.0261633 | 0.0776045 | 11.789   | 0.135   | 11.634   | 11.871   | 13.140   | 0.614   | 12.624   | 13.819   |
| 12293 | ENSG00000152894 | PTPRK     | -1.1 | 0.0059173 | 0.0241273 | 25.798   | 0.869   | 25.063   | 26.757   | 28.854   | 1.013   | 27.971   | 29.959   |
| 12294 | ENSG00000173482 | PTPRM     | 1.3  | 5.046E-05 | 0.000517  | 5.282    | 0.209   | 5.059    | 5.473    | 4.130    | 0.376   | 3.791    | 4.535    |
| 12296 | ENSG00000105426 | PTPRS     | -1.2 | 4.709E-07 | 1.029E-05 | 41.092   | 1.088   | 39.837   | 41.778   | 50.474   | 2.562   | 48.498   | 53.369   |
| 12297 | ENSG00000196090 | PTPRT     | -2   | 1.339E-06 | 2.432E-05 | 0.374    | 0.053   | 0.320    | 0.426    | 0.768    | 0.028   | 0.744    | 0.799    |
| 12298 | ENSG00000060656 | PTPRU     | 1.1  | 0.003023  | 0.0141863 | 26.387   | 1.269   | 25.101   | 27.638   | 24.230   | 0.159   | 24.125   | 24.412   |
| 12300 | ENSG00000106278 | PTPRZ1    | -1.1 | 0.0023431 | 0.0115332 | 172.074  | 10.064  | 164.279  | 183.436  | 191.447  | 2.722   | 189.281  | 194.502  |
| 12302 | ENSG00000164611 | PTTG1     | -1.1 | 0.027262  | 0.0801058 | 273.908  | 4.957   | 269.021  | 278.933  | 299.283  | 12.498  | 285.527  | 309.939  |
| 12303 | ENSG00000183255 | PTTG1IP   | 1.1  | 0.0091097 | 0.0337506 | 130.477  | 3.278   | 126.938  | 133.410  | 123.772  | 4.127   | 120.174  | 128.276  |

|       | A               | B          | C    | D         | E         | F       | G     | H       | I       | J       | K      | L       | M       |
|-------|-----------------|------------|------|-----------|-----------|---------|-------|---------|---------|---------|--------|---------|---------|
| 12304 | ENSG00000163661 | PTX3       | 1.5  | 0.0686668 | 0.1614347 | 1.502   | 0.241 | 1.294   | 1.766   | 1.040   | 0.008  | 1.032   | 1.048   |
| 12307 | ENSG00000130021 | PUDP       | 1.1  | 0.0096102 | 0.0352728 | 50.620  | 1.267 | 49.386  | 51.918  | 46.818  | 2.520  | 45.073  | 49.708  |
| 12312 | ENSG00000134644 | PUM1       | -1.1 | 0.0017285 | 0.0090876 | 64.962  | 1.839 | 62.840  | 66.094  | 72.498  | 1.090  | 71.633  | 73.723  |
| 12315 | ENSG00000146676 | PURB       | -1.2 | 4.744E-05 | 0.0004904 | 39.712  | 1.408 | 38.633  | 41.305  | 47.749  | 2.768  | 44.728  | 50.164  |
| 12318 | ENSG00000172733 | PURG       | -1.1 | 0.0694675 | 0.1628645 | 6.965   | 0.218 | 6.716   | 7.126   | 8.120   | 0.788  | 7.619   | 9.028   |
| 12319 | ENSG00000177192 | PUS1       | 1.1  | 0.0948057 | 0.2057285 | 12.144  | 0.649 | 11.514  | 12.810  | 11.432  | 1.088  | 10.512  | 12.633  |
| 12321 | ENSG00000110060 | PUS3       | -1.2 | 0.0020138 | 0.0102128 | 17.610  | 0.616 | 16.900  | 17.996  | 21.894  | 2.451  | 20.011  | 24.666  |
| 12322 | ENSG00000091127 | PUS7       | -1.1 | 0.0249545 | 0.0748724 | 30.395  | 1.421 | 29.049  | 31.881  | 33.777  | 0.994  | 32.950  | 34.880  |
| 12323 | ENSG00000129317 | PUS7L      | 1.1  | 0.0029599 | 0.0139253 | 12.994  | 0.675 | 12.530  | 13.768  | 11.801  | 0.417  | 11.342  | 12.159  |
| 12325 | ENSG00000169972 | PUSL1      | -1.1 | 0.0459251 | 0.1190371 | 20.531  | 1.574 | 18.876  | 22.007  | 23.696  | 3.019  | 20.216  | 25.613  |
| 12328 | ENSG00000100362 | PVALB      | -1.6 | 0.0001865 | 0.0015096 | 6.678   | 0.184 | 6.468   | 6.811   | 11.221  | 1.605  | 9.980   | 13.033  |
| 12329 | ENSG00000073008 | PVR        | 1.3  | 0.0005382 | 0.0035514 | 10.597  | 1.397 | 9.188   | 11.981  | 8.392   | 0.049  | 8.347   | 8.444   |
| 12331 | ENSG00000242242 | PVRL3-AS1  | 1.4  | 0.0754475 | 0.1732107 | 2.639   | 0.139 | 2.483   | 2.751   | 1.893   | 0.522  | 1.306   | 2.305   |
| 12333 | ENSG00000279192 | PWAR5      | -1.2 | 0.0007147 | 0.0044391 | 81.984  | 2.999 | 78.522  | 83.719  | 99.626  | 10.938 | 93.151  | 112.255 |
| 12334 | ENSG00000257151 | PWAR6      | 1.3  | 1.532E-07 | 3.955E-06 | 128.406 | 9.051 | 120.757 | 138.398 | 102.804 | 3.247  | 100.620 | 106.536 |
| 12335 | ENSG00000136045 | PWP1       | -1.1 | 0.0840388 | 0.1884603 | 65.321  | 1.753 | 63.622  | 67.123  | 70.538  | 0.423  | 70.097  | 70.940  |
| 12338 | ENSG00000241945 | PWP2       | -1.1 | 0.0227861 | 0.0698281 | 12.580  | 0.172 | 12.387  | 12.716  | 14.191  | 0.900  | 13.170  | 14.865  |
| 12340 | ENSG00000171813 | PWWP2B     | -1.2 | 0.0022944 | 0.0113201 | 13.166  | 0.524 | 12.757  | 13.756  | 16.584  | 2.396  | 15.172  | 19.351  |
| 12344 | ENSG00000168994 | PXDC1      | 1.2  | 0.0779679 | 0.1778144 | 5.590   | 0.532 | 5.255   | 6.203   | 4.684   | 1.125  | 3.778   | 5.942   |
| 12347 | ENSG00000130508 | PXDN       | 1.1  | 0.0003804 | 0.002684  | 57.793  | 0.766 | 57.042  | 58.574  | 53.248  | 1.649  | 51.992  | 55.115  |
| 12350 | ENSG00000176894 | PXMP2      | 1.3  | 0.0948879 | 0.2058278 | 4.240   | 1.042 | 3.280   | 5.348   | 3.361   | 0.679  | 2.647   | 3.999   |
| 12353 | ENSG00000101417 | PXMP4      | -1.2 | 0.048111  | 0.1232622 | 4.185   | 0.218 | 4.001   | 4.426   | 4.923   | 0.239  | 4.666   | 5.138   |
| 12354 | ENSG00000089159 | PXN        | 1.2  | 4.581E-05 | 0.0004767 | 55.786  | 0.483 | 55.320  | 56.284  | 49.386  | 3.137  | 46.611  | 52.790  |
| 12355 | ENSG00000255857 | PXN-AS1    | -1.5 | 0.0001637 | 0.0013586 | 5.953   | 0.874 | 5.152   | 6.886   | 8.854   | 0.612  | 8.352   | 9.536   |
| 12356 | ENSG00000103490 | PYCARD     | 1.2  | 0.0033349 | 0.0153187 | 26.456  | 0.380 | 26.061  | 26.819  | 22.435  | 0.662  | 21.785  | 23.109  |
| 12358 | ENSG00000261359 | PYCARD-AS1 | -1.3 | 0.0940856 | 0.2045333 | 2.705   | 0.221 | 2.449   | 2.833   | 3.730   | 0.195  | 3.505   | 3.856   |
| 12362 | ENSG00000143811 | PYCR2      | 1.1  | 0.0202099 | 0.0635688 | 24.408  | 1.330 | 22.872  | 25.184  | 22.456  | 1.032  | 21.544  | 23.577  |
| 12363 | ENSG00000169900 | PYDC1      | 1.4  | 0.0209623 | 0.0654839 | 7.621   | 2.261 | 5.710   | 10.117  | 5.424   | 0.463  | 5.086   | 5.952   |
| 12364 | ENSG00000100994 | PYGB       | 1.1  | 0.003603  | 0.0163209 | 35.680  | 0.715 | 34.915  | 36.331  | 32.521  | 2.604  | 30.789  | 35.517  |
| 12365 | ENSG00000068976 | PYGM       | -1.4 | 0.0001094 | 0.0009706 | 3.617   | 0.429 | 3.260   | 4.093   | 5.323   | 0.356  | 4.925   | 5.612   |
| 12366 | ENSG00000171016 | PYGO1      | 1.5  | 0.0009045 | 0.0053773 | 1.287   | 0.083 | 1.203   | 1.370   | 0.858   | 0.109  | 0.777   | 0.983   |
| 12367 | ENSG00000163348 | PYGO2      | -1.2 | 0.0010447 | 0.0060865 | 27.843  | 0.861 | 26.862  | 28.471  | 32.999  | 2.323  | 31.492  | 35.674  |
| 12368 | ENSG00000151552 | QDPR       | 1.3  | 0.0001185 | 0.0010385 | 24.662  | 0.327 | 24.374  | 25.018  | 20.169  | 0.685  | 19.377  | 20.568  |
| 12369 | ENSG00000112531 | QKI        | -1.1 | 0.0474526 | 0.1219907 | 46.855  | 0.102 | 46.794  | 46.973  | 50.628  | 1.617  | 48.965  | 52.195  |
| 12370 | ENSG00000115828 | QPCT       | 1.5  | 0.0001168 | 0.001026  | 6.476   | 1.140 | 5.684   | 7.783   | 4.388   | 0.293  | 4.110   | 4.694   |
| 12371 | ENSG00000011478 | QPCTL      | -1.1 | 0.0967636 | 0.2083731 | 14.959  | 0.434 | 14.550  | 15.415  | 16.978  | 1.722  | 15.491  | 18.864  |
| 12373 | ENSG00000103485 | QPRT       | 1.1  | 0.0011125 | 0.0064198 | 121.462 | 6.202 | 114.402 | 126.036 | 111.661 | 1.611  | 110.192 | 113.383 |
| 12374 | ENSG00000198218 | QRICH1     | -1.1 | 0.0074704 | 0.0289854 | 53.980  | 1.235 | 53.142  | 55.399  | 59.986  | 1.372  | 58.431  | 61.031  |
| 12375 | ENSG00000130348 | QRSL1      | -1.1 | 0.0550842 | 0.1368812 | 15.562  | 0.784 | 14.699  | 16.229  | 17.290  | 0.756  | 16.635  | 18.118  |
| 12377 | ENSG00000060749 | QSER1      | -1.1 | 0.0012879 | 0.0071863 | 66.889  | 0.999 | 65.941  | 67.932  | 74.759  | 1.014  | 74.125  | 75.928  |
| 12378 | ENSG00000165661 | QSOX2      | -1.1 | 0.0223852 | 0.0687989 | 29.052  | 2.354 | 27.199  | 31.700  | 32.713  | 1.981  | 30.477  | 34.249  |

|       | A               | B        | C    | D         | E         | F       | G     | H       | I       | J       | K     | L       | M       |
|-------|-----------------|----------|------|-----------|-----------|---------|-------|---------|---------|---------|-------|---------|---------|
| 12381 | ENSG00000213339 | QTRT1    | -1.1 | 0.0530872 | 0.1330057 | 23.418  | 0.528 | 22.847  | 23.890  | 26.261  | 1.187 | 24.993  | 27.344  |
| 12382 | ENSG00000151576 | QTRT2    | 1.1  | 0.053432  | 0.1335643 | 17.769  | 1.106 | 16.630  | 18.839  | 16.824  | 0.802 | 16.245  | 17.740  |
| 12384 | ENSG00000104679 | R3HCC1   | -1.1 | 0.0458427 | 0.1188985 | 12.972  | 0.540 | 12.631  | 13.594  | 15.018  | 1.264 | 13.770  | 16.298  |
| 12386 | ENSG00000048991 | R3HDM1   | -1.1 | 0.0196091 | 0.0620019 | 24.807  | 0.644 | 24.070  | 25.265  | 27.382  | 0.958 | 26.368  | 28.272  |
| 12387 | ENSG00000084733 | RAB10    | 1.1  | 0.0610147 | 0.1475889 | 121.416 | 1.973 | 119.627 | 123.532 | 117.517 | 0.482 | 117.073 | 118.030 |
| 12391 | ENSG00000103769 | RAB11A   | -1.1 | 0.0321974 | 0.0911669 | 81.963  | 2.470 | 80.471  | 84.814  | 89.112  | 0.989 | 88.109  | 90.086  |
| 12394 | ENSG00000185236 | RAB11B   | 1.1  | 0.000938  | 0.0055491 | 56.224  | 2.448 | 53.924  | 58.797  | 50.267  | 1.430 | 48.647  | 51.352  |
| 12395 | ENSG00000143545 | RAB13    | 1.2  | 1.114E-05 | 0.000146  | 74.750  | 4.999 | 69.293  | 79.109  | 63.581  | 3.615 | 59.804  | 67.009  |
| 12396 | ENSG00000119396 | RAB14    | -1.1 | 0.115336  | 0.2359354 | 44.358  | 0.935 | 43.650  | 45.419  | 47.829  | 1.709 | 45.915  | 49.202  |
| 12397 | ENSG00000139998 | RAB15    | 1.2  | 0.0002676 | 0.0020189 | 41.224  | 1.053 | 40.081  | 42.154  | 36.559  | 2.641 | 33.842  | 39.117  |
| 12399 | ENSG00000099246 | RAB18    | 1.1  | 0.0308842 | 0.0882935 | 37.860  | 0.367 | 37.516  | 38.246  | 35.751  | 1.329 | 34.381  | 37.035  |
| 12400 | ENSG00000139832 | RAB20    | 1.4  | 6.341E-07 | 1.311E-05 | 29.107  | 1.118 | 27.873  | 30.054  | 20.758  | 1.771 | 18.926  | 22.460  |
| 12401 | ENSG00000112210 | RAB23    | 1.1  | 0.0866365 | 0.1925976 | 17.862  | 0.337 | 17.474  | 18.085  | 16.801  | 1.194 | 15.811  | 18.128  |
| 12403 | ENSG00000169228 | RAB24    | -1.3 | 0.0187612 | 0.059926  | 6.705   | 0.760 | 6.060   | 7.543   | 8.758   | 1.850 | 6.693   | 10.264  |
| 12405 | ENSG00000132698 | RAB25    | -1.3 | 5.197E-07 | 1.118E-05 | 37.779  | 0.264 | 37.478  | 37.976  | 51.429  | 5.231 | 45.970  | 56.398  |
| 12406 | ENSG00000069974 | RAB27A   | 1.2  | 0.0067101 | 0.0266029 | 5.452   | 0.140 | 5.369   | 5.614   | 4.606   | 0.361 | 4.295   | 5.002   |
| 12407 | ENSG00000041353 | RAB27B   | 1.7  | 0.008378  | 0.0316712 | 0.505   | 0.128 | 0.358   | 0.581   | 0.299   | 0.046 | 0.247   | 0.334   |
| 12408 | ENSG00000157869 | RAB28    | 1.1  | 0.0859724 | 0.1915746 | 41.753  | 1.267 | 40.843  | 43.200  | 39.502  | 2.071 | 37.251  | 41.327  |
| 12411 | ENSG00000117280 | RAB29    | 1.2  | 0.0135941 | 0.0466458 | 15.336  | 1.359 | 14.354  | 16.887  | 13.547  | 1.500 | 11.841  | 14.660  |
| 12413 | ENSG00000104388 | RAB2A    | 1.1  | 0.0017966 | 0.0093445 | 43.301  | 1.273 | 42.029  | 44.575  | 39.796  | 1.680 | 37.896  | 41.087  |
| 12414 | ENSG00000129472 | RAB2B    | -1.1 | 0.0380853 | 0.1029775 | 24.704  | 1.087 | 23.818  | 25.918  | 27.886  | 2.606 | 25.474  | 30.650  |
| 12416 | ENSG00000137502 | RAB30    | 1.2  | 0.0155933 | 0.0520121 | 2.316   | 0.233 | 2.071   | 2.535   | 1.980   | 0.004 | 1.975   | 1.983   |
| 12417 | ENSG00000168461 | RAB31    | 1.1  | 0.0019126 | 0.0098261 | 29.334  | 2.072 | 27.506  | 31.585  | 26.628  | 0.429 | 26.189  | 27.046  |
| 12418 | ENSG00000118508 | RAB32    | 1.3  | 0.0114568 | 0.0406393 | 15.380  | 1.379 | 14.194  | 16.894  | 11.920  | 3.364 | 8.039   | 14.008  |
| 12422 | ENSG00000134594 | RAB33A   | 1.3  | 0.096812  | 0.2083834 | 4.946   | 0.141 | 4.812   | 5.092   | 4.023   | 0.429 | 3.703   | 4.510   |
| 12424 | ENSG00000172007 | RAB33B   | -1.1 | 0.0872088 | 0.1934884 | 11.565  | 0.764 | 11.070  | 12.445  | 12.964  | 0.848 | 12.411  | 13.940  |
| 12428 | ENSG00000109113 | RAB34    | 1.1  | 0.0001357 | 0.0011579 | 94.946  | 1.578 | 93.742  | 96.732  | 85.750  | 3.920 | 81.538  | 89.290  |
| 12430 | ENSG00000111737 | RAB35    | 1.1  | 0.0747963 | 0.1721597 | 23.776  | 0.935 | 23.003  | 24.815  | 22.525  | 1.356 | 21.535  | 24.070  |
| 12431 | ENSG00000172794 | RAB37    | -1.8 | 3.815E-09 | 1.621E-07 | 3.085   | 0.106 | 2.997   | 3.203   | 5.701   | 0.432 | 5.203   | 5.980   |
| 12432 | ENSG00000123892 | RAB38    | 1.1  | 0.0783353 | 0.1785318 | 37.854  | 1.919 | 36.684  | 40.068  | 35.137  | 4.181 | 31.166  | 39.500  |
| 12433 | ENSG00000155961 | RAB39B   | 1.1  | 0.0459522 | 0.119045  | 12.787  | 1.552 | 11.562  | 14.533  | 11.509  | 0.867 | 10.798  | 12.475  |
| 12436 | ENSG00000105649 | RAB3A    | -1.3 | 0.0149785 | 0.0503941 | 5.489   | 1.310 | 4.063   | 6.638   | 7.400   | 0.930 | 6.518   | 8.371   |
| 12437 | ENSG00000169213 | RAB3B    | 1.2  | 1.278E-05 | 0.0001643 | 42.577  | 3.114 | 38.983  | 44.484  | 37.448  | 1.139 | 36.252  | 38.518  |
| 12438 | ENSG00000152932 | RAB3C    | -1.3 | 5.281E-05 | 0.0005348 | 4.366   | 0.231 | 4.104   | 4.541   | 5.803   | 0.415 | 5.442   | 6.257   |
| 12439 | ENSG00000105514 | RAB3D    | -1.2 | 0.0055596 | 0.0229674 | 9.779   | 1.100 | 9.006   | 11.038  | 11.949  | 0.719 | 11.146  | 12.535  |
| 12441 | ENSG00000115839 | RAB3GAP1 | 1.1  | 0.0154448 | 0.0516139 | 39.245  | 0.341 | 38.868  | 39.533  | 37.173  | 1.966 | 34.930  | 38.598  |
| 12442 | ENSG00000127328 | RAB3IP   | 1.1  | 0.0017665 | 0.0092288 | 11.544  | 0.204 | 11.364  | 11.765  | 10.441  | 0.389 | 10.097  | 10.864  |
| 12444 | ENSG00000167578 | RAB4B    | 1.2  | 0.0953317 | 0.2063405 | 3.453   | 0.288 | 3.184   | 3.756   | 2.974   | 0.060 | 2.904   | 3.014   |
| 12446 | ENSG00000111540 | RAB5B    | 1.1  | 0.0076173 | 0.0294539 | 42.630  | 0.785 | 41.730  | 43.171  | 39.947  | 1.447 | 39.037  | 41.616  |
| 12447 | ENSG00000108774 | RAB5C    | 1.1  | 0.0733482 | 0.1697507 | 25.015  | 1.138 | 23.958  | 26.220  | 23.392  | 1.007 | 22.658  | 24.540  |
| 12449 | ENSG00000154917 | RAB6B    | -1.3 | 0.0004635 | 0.0031447 | 7.280   | 1.034 | 6.270   | 8.336   | 9.614   | 1.415 | 8.032   | 10.758  |

|       | A               | B              | C    | D         | E          | F       | G     | H       | I       | J       | K      | L       | M       |
|-------|-----------------|----------------|------|-----------|------------|---------|-------|---------|---------|---------|--------|---------|---------|
| 12451 | ENSG00000075785 | RAB7A          | 1.2  | 5.481E-07 | 1.168E-05  | 210.375 | 1.075 | 209.138 | 211.088 | 182.387 | 6.110  | 177.525 | 189.245 |
| 12452 | ENSG00000276600 | RAB7B          | 5.6  | 3.352E-07 | 7.714E-06  | 1.059   | 0.331 | 0.761   | 1.415   | 0.188   | 0.091  | 0.084   | 0.255   |
| 12453 | ENSG00000167461 | RAB8A          | -1.1 | 0.0089295 | 0.0332508  | 23.059  | 1.651 | 21.175  | 24.252  | 26.257  | 0.739  | 25.729  | 27.102  |
| 12455 | ENSG00000123570 | RAB9B          | 1.3  | 0.0722317 | 0.1678097  | 1.949   | 0.362 | 1.695   | 2.364   | 1.523   | 0.401  | 1.106   | 1.906   |
| 12456 | ENSG00000105404 | RABAC1         | -1.2 | 0.0021154 | 0.010601   | 39.173  | 0.322 | 38.801  | 39.367  | 46.562  | 2.113  | 44.438  | 48.664  |
| 12457 | ENSG00000152061 | RABGAP1L       | -1.4 | 5.41E-14  | 8.03E-12   | 17.874  | 0.202 | 17.641  | 18.003  | 26.083  | 0.470  | 25.760  | 26.622  |
| 12458 | ENSG00000137955 | RABGGTB        | -1.1 | 0.0793428 | 0.1802293  | 49.845  | 5.086 | 45.807  | 55.557  | 54.732  | 3.192  | 51.504  | 57.887  |
| 12459 | ENSG00000144134 | RABL2A         | 1.2  | 0.0031883 | 0.0147931  | 4.453   | 0.228 | 4.190   | 4.600   | 3.653   | 0.300  | 3.345   | 3.944   |
| 12463 | ENSG00000079974 | RABL2B         | 1.3  | 4.054E-05 | 0.0004306  | 7.782   | 0.216 | 7.533   | 7.920   | 6.116   | 0.263  | 5.885   | 6.402   |
| 12464 | ENSG00000144840 | RABL3          | 1.2  | 0.0004044 | 0.0028141  | 19.787  | 1.718 | 17.872  | 21.196  | 16.911  | 0.751  | 16.094  | 17.572  |
| 12465 | ENSG00000169750 | RAC3           | -1.2 | 5.796E-06 | 8.429E-05  | 64.117  | 0.280 | 63.912  | 64.437  | 80.000  | 1.516  | 78.921  | 81.733  |
| 12466 | ENSG00000161800 | RACGAP1        | -1.3 | 1.854E-07 | 4.675E-06  | 52.726  | 3.556 | 49.573  | 56.580  | 68.949  | 5.649  | 65.207  | 75.447  |
| 12468 | ENSG00000204628 | RACK1          | -1.1 | 0.0072942 | 0.0284188  | 519.609 | 2.827 | 516.647 | 522.278 | 565.198 | 17.183 | 546.715 | 580.687 |
| 12469 | ENSG00000164754 | RAD21          | -1.1 | 3.178E-05 | 0.0003504  | 181.214 | 6.065 | 175.368 | 187.477 | 208.435 | 6.497  | 201.686 | 214.646 |
| 12470 | ENSG00000179262 | RAD23A         | -1.2 | 0.0007968 | 0.0048526  | 58.086  | 2.303 | 55.465  | 59.784  | 68.397  | 1.634  | 66.521  | 69.508  |
| 12472 | ENSG00000119318 | RAD23B         | -1.1 | 0.0235663 | 0.071671   | 197.627 | 3.040 | 195.265 | 201.057 | 214.259 | 1.477  | 212.875 | 215.814 |
| 12473 | ENSG00000051180 | RAD51          | 1.2  | 0.001925  | 0.0098688  | 28.470  | 2.706 | 25.448  | 30.668  | 24.962  | 0.911  | 23.927  | 25.645  |
| 12474 | ENSG00000108384 | RAD51C         | 1.2  | 0.016465  | 0.0543125  | 5.225   | 0.498 | 4.869   | 5.794   | 4.479   | 0.452  | 3.960   | 4.786   |
| 12475 | ENSG00000185379 | RAD51D         | 1.3  | 8.656E-05 | 0.0008031  | 4.456   | 0.323 | 4.101   | 4.732   | 3.582   | 0.036  | 3.545   | 3.617   |
| 12477 | ENSG00000002016 | RAD52          | -1.4 | 1.534E-05 | 0.0001898  | 5.809   | 0.222 | 5.642   | 6.061   | 8.250   | 0.424  | 7.876   | 8.710   |
| 12478 | ENSG00000197275 | RAD54B         | -1.1 | 0.0304254 | 0.0871587  | 6.143   | 0.263 | 5.840   | 6.309   | 7.201   | 0.324  | 6.829   | 7.424   |
| 12480 | ENSG00000085999 | RAD54L         | -1.1 | 0.003784  | 0.0169622  | 32.374  | 0.506 | 31.875  | 32.886  | 37.136  | 1.799  | 35.682  | 39.148  |
| 12482 | ENSG00000157927 | RADIL          | -1.5 | 0.0001459 | 0.00123    | 1.622   | 0.209 | 1.382   | 1.761   | 2.464   | 0.319  | 2.177   | 2.808   |
| 12483 | ENSG00000166349 | RAG1           | 1.4  | 0.0037952 | 0.0170035  | 2.174   | 0.132 | 2.097   | 2.326   | 1.634   | 0.419  | 1.212   | 2.050   |
| 12484 | ENSG00000039560 | RAI14          | 1.2  | 7.854E-07 | 1.561E-05  | 73.314  | 2.972 | 71.150  | 76.703  | 63.772  | 0.955  | 62.831  | 64.740  |
| 12485 | ENSG00000006451 | RALA           | -1   | 0.1160041 | 0.2370682  | 93.006  | 2.359 | 90.982  | 95.596  | 99.538  | 3.448  | 96.400  | 103.229 |
| 12486 | ENSG00000017797 | RALBP1         | -1.1 | 0.0012722 | 0.0071223  | 37.437  | 0.797 | 36.796  | 38.329  | 42.214  | 1.314  | 40.703  | 43.091  |
| 12487 | ENSG00000229419 | RALGAPA1<br>P1 | 1.1  | 0.0088291 | 0.0329565  | 10.750  | 0.409 | 10.363  | 11.178  | 9.606   | 0.635  | 8.926   | 10.184  |
| 12488 | ENSG00000136828 | RALGPS1        | -1.1 | 0.0256131 | 0.0763608  | 11.705  | 0.021 | 11.684  | 11.727  | 13.048  | 0.528  | 12.444  | 13.421  |
| 12489 | ENSG00000131477 | RAMP2          | -1.2 | 0.0452633 | 0.1177207  | 14.792  | 1.335 | 14.016  | 16.334  | 17.838  | 1.356  | 16.718  | 19.346  |
| 12491 | ENSG00000204764 | RANBP17        | -1.1 | 0.0903879 | 0.1989693  | 6.300   | 0.384 | 5.884   | 6.643   | 6.978   | 0.257  | 6.756   | 7.260   |
| 12492 | ENSG00000137040 | RANBP6         | -1.1 | 0.0091733 | 0.03939343 | 43.317  | 0.987 | 42.683  | 44.454  | 48.718  | 1.969  | 46.458  | 50.063  |
| 12493 | ENSG00000100401 | RANGAP1        | -1.1 | 0.0002716 | 0.0020432  | 96.986  | 1.489 | 96.115  | 98.705  | 111.024 | 7.336  | 102.594 | 115.954 |
| 12494 | ENSG00000116473 | RAP1A          | 1.1  | 0.0687992 | 0.1616562  | 24.106  | 1.100 | 23.021  | 25.221  | 22.918  | 1.371  | 22.024  | 24.496  |
| 12496 | ENSG00000132359 | RAP1GAP2       | -1.1 | 0.0009965 | 0.0058539  | 25.663  | 0.370 | 25.325  | 26.058  | 29.402  | 0.669  | 28.791  | 30.117  |
| 12497 | ENSG00000181467 | RAP2B          | -1.1 | 0.0427254 | 0.1123992  | 12.412  | 1.082 | 11.375  | 13.534  | 13.972  | 1.468  | 12.283  | 14.945  |
| 12498 | ENSG00000232160 | RAP2C-<br>AS1  | -1.2 | 0.0819336 | 0.184963   | 2.443   | 0.170 | 2.298   | 2.631   | 3.079   | 0.745  | 2.360   | 3.848   |
| 12499 | ENSG00000109756 | RAPGEF2        | 1.1  | 0.0219806 | 0.0678516  | 19.898  | 1.379 | 18.851  | 21.461  | 18.819  | 0.539  | 18.227  | 19.281  |

|       | A               | B          | C    | D         | E         | F      | G     | H      | I      | J      | K     | L      | M      |
|-------|-----------------|------------|------|-----------|-----------|--------|-------|--------|--------|--------|-------|--------|--------|
| 12500 | ENSG00000136237 | RAPGEF5    | 1.2  | 0.0008475 | 0.0051132 | 4.048  | 0.131 | 3.941  | 4.194  | 3.342  | 0.304 | 3.030  | 3.638  |
| 12504 | ENSG00000172819 | RARG       | -1.4 | 6.83E-11  | 4.6E-09   | 26.144 | 1.061 | 25.339 | 27.346 | 37.812 | 1.572 | 36.833 | 39.626 |
| 12505 | ENSG00000106538 | RARRES2    | -1.1 | 0.0295471 | 0.0852636 | 68.243 | 1.486 | 66.636 | 69.568 | 75.615 | 3.065 | 72.714 | 78.822 |
| 12506 | ENSG00000133321 | RARRES3    | 3.1  | 7.448E-06 | 0.0001037 | 3.116  | 0.162 | 2.982  | 3.296  | 1.019  | 0.156 | 0.899  | 1.196  |
| 12507 | ENSG00000113643 | RARS       | -1.1 | 0.006605  | 0.0262847 | 80.397 | 2.332 | 78.129 | 82.788 | 89.493 | 1.552 | 87.977 | 91.078 |
| 12509 | ENSG00000146282 | RARS2      | 1.1  | 0.0031406 | 0.0146326 | 52.491 | 1.954 | 50.462 | 54.359 | 47.670 | 1.481 | 46.742 | 49.378 |
| 12510 | ENSG00000145715 | RASA1      | -1.1 | 0.0160152 | 0.0532256 | 42.899 | 2.037 | 40.945 | 45.010 | 47.435 | 1.424 | 46.028 | 48.875 |
| 12511 | ENSG00000155903 | RASA2      | 1.3  | 1.091E-06 | 2.057E-05 | 26.089 | 1.659 | 25.104 | 28.005 | 21.302 | 0.895 | 20.434 | 22.222 |
| 12512 | ENSG00000075391 | RASAL2     | 1.3  | 6.834E-09 | 2.664E-07 | 16.105 | 0.711 | 15.517 | 16.896 | 12.857 | 0.761 | 12.129 | 13.647 |
| 12514 | ENSG00000224687 | RASAL2-AS1 | 1.4  | 0.105293  | 0.2211925 | 2.011  | 0.555 | 1.567  | 2.634  | 1.507  | 0.562 | 0.996  | 2.109  |
| 12517 | ENSG00000100302 | RASD2      | -1.2 | 0.0665768 | 0.1577712 | 2.865  | 0.124 | 2.728  | 2.969  | 3.545  | 0.628 | 3.095  | 4.263  |
| 12518 | ENSG00000165105 | RASEF      | 1.2  | 0.0048235 | 0.0205853 | 4.196  | 0.201 | 4.019  | 4.414  | 3.482  | 0.045 | 3.439  | 3.528  |
| 12520 | ENSG00000113319 | RASGRF2    | 1.6  | 0.0001167 | 0.0010254 | 4.297  | 1.047 | 3.570  | 5.497  | 2.799  | 0.353 | 2.478  | 3.177  |
| 12522 | ENSG00000068831 | RASGRP2    | -1.3 | 1.728E-05 | 0.0002098 | 6.242  | 0.367 | 5.974  | 6.661  | 8.561  | 0.974 | 7.543  | 9.486  |
| 12523 | ENSG00000270885 | RASL10B    | -1.2 | 0.0026741 | 0.012874  | 18.572 | 1.298 | 17.201 | 19.782 | 22.364 | 1.587 | 21.153 | 24.161 |
| 12524 | ENSG00000122035 | RASL11A    | -1.8 | 0.0067758 | 0.0267818 | 0.912  | 0.160 | 0.727  | 1.009  | 1.738  | 0.338 | 1.348  | 1.952  |
| 12525 | ENSG00000128045 | RASL11B    | -1.3 | 0.0024243 | 0.011847  | 22.990 | 4.537 | 18.169 | 27.176 | 29.891 | 2.448 | 27.072 | 31.475 |
| 12526 | ENSG00000068028 | RASSF1     | -1.2 | 0.0613739 | 0.1481399 | 6.729  | 0.864 | 6.053  | 7.702  | 7.968  | 1.143 | 6.662  | 8.791  |
| 12527 | ENSG00000101265 | RASSF2     | 1.3  | 9.307E-05 | 0.0008527 | 12.981 | 0.412 | 12.537 | 13.349 | 10.604 | 0.217 | 10.409 | 10.838 |
| 12528 | ENSG00000107551 | RASSF4     | -1.3 | 0.0004914 | 0.0033061 | 4.141  | 0.160 | 4.018  | 4.321  | 5.323  | 0.439 | 4.841  | 5.700  |
| 12529 | ENSG00000246695 | RASSF8-AS1 | -1.2 | 0.0981244 | 0.2103661 | 4.190  | 0.552 | 3.555  | 4.562  | 5.011  | 0.838 | 4.252  | 5.911  |
| 12530 | ENSG00000198774 | RASSF9     | 2.9  | 0.0335579 | 0.0939444 | 0.139  | 0.015 | 0.130  | 0.156  | 0.046  | 0.015 | 0.029  | 0.055  |
| 12531 | ENSG00000249485 | RBBP4P1    | -1.1 | 0.025456  | 0.0760397 | 39.978 | 6.080 | 35.986 | 46.976 | 46.769 | 2.470 | 44.381 | 49.313 |
| 12532 | ENSG00000117222 | RBBP5      | -1.1 | 0.0064825 | 0.0258579 | 18.240 | 0.566 | 17.835 | 18.887 | 21.106 | 1.017 | 19.970 | 21.934 |
| 12533 | ENSG00000101773 | RBBP8      | 1.2  | 9.901E-06 | 0.0001325 | 28.483 | 0.542 | 27.946 | 29.030 | 24.321 | 0.870 | 23.405 | 25.136 |
| 12534 | ENSG00000089050 | RBBP9      | 1.1  | 0.0082865 | 0.0314165 | 22.109 | 0.272 | 21.879 | 22.409 | 19.817 | 1.537 | 18.651 | 21.559 |
| 12535 | ENSG00000078328 | RBFOX1     | -2   | 0.0014085 | 0.0076943 | 0.198  | 0.001 | 0.198  | 0.200  | 0.412  | 0.075 | 0.325  | 0.457  |
| 12538 | ENSG00000167281 | RBFOX3     | -1.1 | 0.1061339 | 0.2224891 | 3.211  | 0.083 | 3.125  | 3.292  | 3.659  | 0.203 | 3.431  | 3.822  |
| 12539 | ENSG00000182872 | RBM10      | -1.2 | 0.0001647 | 0.0013641 | 42.812 | 0.735 | 42.217 | 43.634 | 50.613 | 3.186 | 48.749 | 54.291 |
| 12541 | ENSG00000185272 | RBM11      | 1.2  | 0.0566223 | 0.1394979 | 6.551  | 0.726 | 6.068  | 7.386  | 5.633  | 0.377 | 5.199  | 5.869  |
| 12542 | ENSG00000244462 | RBM12      | 1.1  | 0.0015463 | 0.0083025 | 88.521 | 5.480 | 82.414 | 93.010 | 81.643 | 2.028 | 79.883 | 83.860 |
| 12545 | ENSG00000162775 | RBM15      | -1.2 | 0.0002758 | 0.0020703 | 13.385 | 0.937 | 12.457 | 14.331 | 16.605 | 0.516 | 16.010 | 16.927 |
| 12547 | ENSG00000259956 | RBM15B     | -1.2 | 4.469E-05 | 0.0004672 | 44.838 | 0.854 | 43.959 | 45.665 | 52.935 | 3.846 | 48.828 | 56.451 |
| 12549 | ENSG00000134453 | RBM17      | -1.1 | 0.0329635 | 0.0928413 | 40.559 | 2.949 | 38.195 | 43.863 | 44.603 | 1.588 | 42.823 | 45.875 |
| 12550 | ENSG00000119446 | RBM18      | 1.2  | 0.0021274 | 0.010639  | 11.732 | 0.148 | 11.562 | 11.827 | 10.161 | 0.254 | 9.869  | 10.330 |
| 12551 | ENSG00000203867 | RBM20      | 3.1  | 3.387E-07 | 7.745E-06 | 0.677  | 0.083 | 0.584  | 0.742  | 0.221  | 0.023 | 0.204  | 0.247  |
| 12554 | ENSG00000086589 | RBM22      | -1.1 | 0.1118026 | 0.231107  | 28.386 | 1.516 | 26.997 | 30.003 | 30.937 | 0.348 | 30.544 | 31.208 |
| 12556 | ENSG00000100461 | RBM23      | 1.1  | 0.0983255 | 0.2106638 | 8.179  | 0.254 | 8.011  | 8.471  | 7.833  | 0.334 | 7.451  | 8.063  |
| 12557 | ENSG00000139746 | RBM26      | -1.1 | 0.0238751 | 0.0723784 | 42.389 | 1.502 | 40.737 | 43.672 | 46.564 | 2.051 | 44.617 | 48.704 |
| 12558 | ENSG00000106344 | RBM28      | -1.2 | 0.000368  | 0.002611  | 10.330 | 0.723 | 9.533  | 10.944 | 12.183 | 0.256 | 11.888 | 12.345 |
| 12559 | ENSG00000102317 | RBM3       | 1.1  | 0.0311355 | 0.0888618 | 89.187 | 7.988 | 80.372 | 95.946 | 84.511 | 1.923 | 82.957 | 86.661 |



|       | A               | B       | C    | D         | E         | F       | G      | H       | I       | J       | K      | L       | M       |
|-------|-----------------|---------|------|-----------|-----------|---------|--------|---------|---------|---------|--------|---------|---------|
| 12560 | ENSG00000184863 | RBM33   | -1.3 | 2.952E-08 | 9.547E-07 | 17.319  | 0.950  | 16.224  | 17.922  | 22.166  | 0.122  | 22.069  | 22.303  |
| 12561 | ENSG00000131051 | RBM39   | 1.2  | 9.882E-06 | 0.0001323 | 75.821  | 3.722  | 71.955  | 79.379  | 67.092  | 3.015  | 64.847  | 70.520  |
| 12563 | ENSG00000089682 | RBM41   | -1.1 | 0.0956024 | 0.2068206 | 15.197  | 0.516  | 14.701  | 15.730  | 16.721  | 0.491  | 16.418  | 17.288  |
| 12566 | ENSG00000126254 | RBM42   | -1.1 | 0.0668156 | 0.1581853 | 49.575  | 1.691  | 47.885  | 51.267  | 54.357  | 1.824  | 52.447  | 56.080  |
| 12567 | ENSG00000177483 | RBM44   | 1.2  | 0.0472905 | 0.1217019 | 1.893   | 0.126  | 1.749   | 1.977   | 1.557   | 0.113  | 1.463   | 1.683   |
| 12568 | ENSG00000155636 | RBM45   | 1.1  | 0.0338607 | 0.0945962 | 8.141   | 1.002  | 7.443   | 9.290   | 7.246   | 0.492  | 6.947   | 7.813   |
| 12569 | ENSG00000163694 | RBM47   | 1.2  | 3.352E-06 | 5.254E-05 | 20.501  | 1.405  | 19.591  | 22.119  | 17.040  | 0.695  | 16.530  | 17.831  |
| 12570 | ENSG00000127993 | RBM48   | -1.2 | 0.0062402 | 0.0251168 | 4.988   | 0.735  | 4.141   | 5.464   | 6.304   | 0.453  | 6.019   | 6.827   |
| 12572 | ENSG00000173914 | RBM4B   | 1.1  | 0.0440488 | 0.115289  | 12.615  | 0.661  | 11.948  | 13.271  | 11.455  | 1.288  | 10.534  | 12.927  |
| 12574 | ENSG00000003756 | RBM5    | -1.2 | 2.625E-06 | 4.302E-05 | 26.240  | 0.815  | 25.348  | 26.946  | 31.465  | 0.696  | 30.921  | 32.249  |
| 12575 | ENSG00000004534 | RBM6    | -1.2 | 1.601E-06 | 2.807E-05 | 40.525  | 0.629  | 40.113  | 41.248  | 49.300  | 2.699  | 46.620  | 52.018  |
| 12576 | ENSG00000076053 | RBM7    | 1.1  | 0.1018896 | 0.2160284 | 16.554  | 0.360  | 16.226  | 16.939  | 15.860  | 0.297  | 15.619  | 16.191  |
| 12578 | ENSG00000265241 | RBM8A   | 1.1  | 0.0054489 | 0.0225764 | 57.165  | 1.023  | 56.529  | 58.345  | 53.187  | 3.652  | 50.308  | 57.295  |
| 12582 | ENSG00000153250 | RBMS1   | -1.1 | 0.005664  | 0.0233236 | 30.110  | 1.757  | 28.406  | 31.915  | 34.083  | 1.671  | 32.433  | 35.775  |
| 12583 | ENSG00000225422 | RBMS1P1 | -1.1 | 0.0586788 | 0.1431877 | 36.466  | 5.447  | 30.461  | 41.089  | 42.214  | 3.247  | 39.564  | 45.836  |
| 12584 | ENSG00000076067 | RBMS2   | 1.1  | 0.1035524 | 0.218704  | 8.020   | 0.470  | 7.493   | 8.395   | 7.553   | 0.576  | 6.956   | 8.106   |
| 12585 | ENSG00000147274 | RBMX    | -1.3 | 3.30E-14  | 5.37E-12  | 158.530 | 2.547  | 155.740 | 160.730 | 215.477 | 6.102  | 209.460 | 221.660 |
| 12587 | ENSG00000215210 | RBMXP2  | -1.5 | 1.134E-06 | 2.114E-05 | 18.232  | 0.798  | 17.709  | 19.151  | 27.693  | 1.183  | 26.326  | 28.386  |
| 12590 | ENSG00000249465 | RBMXP4  | -1.3 | 0.1175431 | 0.2393747 | 3.702   | 0.417  | 3.430   | 4.182   | 4.825   | 1.321  | 3.609   | 6.231   |
| 12591 | ENSG00000114115 | RBP1    | 1.2  | 0.0103421 | 0.0374783 | 13.871  | 0.547  | 13.242  | 14.231  | 12.301  | 0.729  | 11.795  | 13.137  |
| 12592 | ENSG00000162444 | RBP7    | 1.3  | 0.0288509 | 0.0837495 | 11.352  | 1.087  | 10.382  | 12.526  | 8.772   | 0.484  | 8.356   | 9.304   |
| 12593 | ENSG00000157110 | RBPMS   | 1.1  | 0.0925053 | 0.2021344 | 67.656  | 2.501  | 65.267  | 70.255  | 65.818  | 3.646  | 62.582  | 69.768  |
| 12595 | ENSG00000166831 | RBPMS2  | 1.1  | 0.0001344 | 0.0011503 | 145.303 | 6.436  | 137.923 | 149.753 | 129.352 | 5.088  | 123.959 | 134.067 |
| 12596 | ENSG00000131381 | RBSN    | -1.1 | 0.0116626 | 0.0412917 | 14.110  | 0.336  | 13.737  | 14.389  | 15.890  | 0.486  | 15.499  | 16.434  |
| 12599 | ENSG00000159200 | RCAN1   | 1.3  | 0.0026346 | 0.0127158 | 3.327   | 0.321  | 3.044   | 3.675   | 2.619   | 0.365  | 2.200   | 2.864   |
| 12600 | ENSG00000172348 | RCAN2   | 1.3  | 0.0002051 | 0.0016246 | 13.341  | 0.539  | 12.856  | 13.921  | 10.776  | 0.985  | 9.832   | 11.797  |
| 12601 | ENSG00000117602 | RCAN3   | 1.1  | 0.0130361 | 0.0451246 | 9.488   | 0.334  | 9.185   | 9.847   | 8.586   | 0.273  | 8.361   | 8.890   |
| 12603 | ENSG00000136144 | RCBTB1  | 1.2  | 1.621E-05 | 0.0001984 | 55.670  | 0.650  | 55.264  | 56.420  | 48.802  | 0.874  | 47.908  | 49.654  |
| 12604 | ENSG00000136161 | RCBTB2  | 1.1  | 0.1058879 | 0.2220836 | 13.132  | 0.595  | 12.566  | 13.753  | 12.282  | 0.510  | 11.863  | 12.850  |
| 12608 | ENSG00000180198 | RCC1    | -1.1 | 0.0002747 | 0.0020629 | 62.225  | 1.331  | 60.873  | 63.534  | 71.405  | 1.972  | 69.821  | 73.614  |
| 12610 | ENSG00000179051 | RCC2    | 1.1  | 2.005E-06 | 3.401E-05 | 419.710 | 12.232 | 406.041 | 429.624 | 373.751 | 17.395 | 355.666 | 390.363 |
| 12611 | ENSG00000166965 | RCCD1   | -1.1 | 0.004313  | 0.0188442 | 14.487  | 0.574  | 13.855  | 14.975  | 17.008  | 0.943  | 15.987  | 17.846  |
| 12613 | ENSG00000049449 | RCN1    | 1.2  | 1.2E-07   | 3.2E-06   | 71.372  | 0.408  | 71.035  | 71.826  | 61.597  | 1.837  | 59.705  | 63.375  |
| 12614 | ENSG00000214455 | RCN1P2  | 1.2  | 3.782E-06 | 5.83E-05  | 136.359 | 6.644  | 130.193 | 143.395 | 113.164 | 2.530  | 110.315 | 115.149 |
| 12615 | ENSG00000142552 | RCN3    | -1.3 | 0.0003912 | 0.0027462 | 12.502  | 0.755  | 11.859  | 13.332  | 16.545  | 0.576  | 15.991  | 17.140  |
| 12616 | ENSG00000167771 | RCOR2   | -1.4 | 4.152E-10 | 2.236E-08 | 38.229  | 0.354  | 37.981  | 38.635  | 54.474  | 3.480  | 50.712  | 57.579  |
| 12620 | ENSG00000117625 | RCOR3   | 1.1  | 0.0776711 | 0.1773047 | 8.427   | 0.318  | 8.177   | 8.785   | 7.926   | 0.087  | 7.838   | 8.011   |
| 12625 | ENSG00000072042 | RDH11   | 1.2  | 4.867E-08 | 1.462E-06 | 78.679  | 2.293  | 76.032  | 80.055  | 66.510  | 2.277  | 64.000  | 68.442  |
| 12629 | ENSG00000139988 | RDH12   | 1.4  | 0.0706295 | 0.1648868 | 1.740   | 0.149  | 1.568   | 1.834   | 1.304   | 0.195  | 1.133   | 1.516   |
| 12631 | ENSG00000160439 | RDH13   | -1.3 | 0.0005192 | 0.003456  | 2.872   | 0.065  | 2.808   | 2.938   | 3.759   | 0.324  | 3.415   | 4.059   |
| 12632 | ENSG00000139547 | RDH16   | -1.7 | 0.0011607 | 0.0066299 | 1.283   | 0.177  | 1.108   | 1.462   | 2.199   | 0.430  | 1.704   | 2.483   |
| 12635 | ENSG00000137710 | RDX     | 1.1  | 0.0234831 | 0.0714977 | 55.375  | 1.259  | 54.416  | 56.800  | 52.772  | 0.759  | 52.125  | 53.608  |
| 12637 | ENSG00000100918 | REC8    | 1.4  | 3.669E-05 | 0.0003947 | 13.049  | 0.821  | 12.483  | 13.990  | 9.816   | 1.606  | 8.119   | 11.311  |

|       | A               | B      | C    | D         | E         | F      | G     | H      | I      | J      | K     | L      | M      |
|-------|-----------------|--------|------|-----------|-----------|--------|-------|--------|--------|--------|-------|--------|--------|
| 12639 | ENSG00000122707 | RECK   | -1.1 | 0.0395978 | 0.1060856 | 7.473  | 0.657 | 6.941  | 8.207  | 8.592  | 0.298 | 8.272  | 8.862  |
| 12640 | ENSG00000004700 | RECQL  | 1.1  | 0.0073512 | 0.0285687 | 58.633 | 0.218 | 58.404 | 58.837 | 54.412 | 2.376 | 52.279 | 56.973 |
| 12641 | ENSG00000160957 | RECQL4 | -1.1 | 0.0255663 | 0.076248  | 26.607 | 0.904 | 25.605 | 27.361 | 30.079 | 3.487 | 27.342 | 34.005 |
| 12642 | ENSG00000108469 | RECQL5 | -1.1 | 0.054081  | 0.1348875 | 8.150  | 0.623 | 7.579  | 8.814  | 9.164  | 0.453 | 8.662  | 9.545  |
| 12645 | ENSG00000068615 | REEP1  | 1.6  | 0.0072121 | 0.0281601 | 0.917  | 0.120 | 0.803  | 1.043  | 0.603  | 0.042 | 0.577  | 0.651  |
| 12646 | ENSG00000165476 | REEP3  | 1.1  | 0.0424317 | 0.1118529 | 25.352 | 1.493 | 24.329 | 27.064 | 23.849 | 0.354 | 23.468 | 24.169 |
| 12647 | ENSG00000168476 | REEP4  | -1.2 | 0.0033005 | 0.0152103 | 12.722 | 1.301 | 11.769 | 14.204 | 16.121 | 0.686 | 15.420 | 16.792 |
| 12648 | ENSG00000129625 | REEP5  | 1.3  | 2.749E-08 | 8.924E-07 | 62.331 | 0.421 | 61.890 | 62.729 | 50.894 | 2.828 | 48.093 | 53.749 |
| 12649 | ENSG00000162924 | REL    | 1.3  | 0.0031587 | 0.014697  | 2.598  | 0.389 | 2.151  | 2.859  | 2.050  | 0.266 | 1.766  | 2.293  |
| 12650 | ENSG00000102032 | RENBP  | 1.5  | 1.973E-07 | 4.914E-06 | 18.780 | 0.779 | 17.926 | 19.451 | 12.523 | 0.153 | 12.413 | 12.697 |
| 12651 | ENSG00000214022 | REPIN1 | 1.1  | 0.0143386 | 0.0487358 | 47.029 | 0.864 | 46.050 | 47.685 | 43.988 | 2.880 | 42.072 | 47.300 |
| 12653 | ENSG00000135597 | REPS1  | -1.2 | 6.967E-08 | 1.977E-06 | 19.024 | 0.351 | 18.712 | 19.405 | 24.188 | 1.258 | 22.870 | 25.375 |
| 12654 | ENSG00000169891 | REPS2  | 1.1  | 0.0962607 | 0.2076868 | 3.851  | 0.183 | 3.709  | 4.057  | 3.553  | 0.328 | 3.246  | 3.899  |
| 12656 | ENSG00000084093 | REST   | 1.1  | 0.0260412 | 0.077337  | 38.481 | 0.384 | 38.109 | 38.876 | 36.625 | 1.123 | 35.333 | 37.371 |
| 12657 | ENSG00000165731 | RET    | -1.1 | 0.055531  | 0.1375908 | 4.337  | 0.316 | 3.974  | 4.549  | 5.077  | 0.335 | 4.843  | 5.461  |
| 12658 | ENSG00000042445 | RETSAT | -1.3 | 2.014E-05 | 0.0002385 | 14.483 | 1.755 | 13.280 | 16.497 | 19.314 | 1.718 | 17.411 | 20.751 |
| 12659 | ENSG00000135945 | REV1   | 1.2  | 7.578E-05 | 0.0007205 | 16.872 | 0.566 | 16.492 | 17.522 | 14.388 | 1.160 | 13.468 | 15.692 |
| 12660 | ENSG00000009413 | REV3L  | -1.1 | 0.0575066 | 0.1411009 | 5.920  | 0.474 | 5.600  | 6.464  | 6.684  | 0.509 | 6.124  | 7.119  |
| 12661 | ENSG00000079313 | REXO1  | -1.1 | 0.0304607 | 0.0872451 | 18.254 | 0.397 | 18.016 | 18.713 | 20.804 | 2.418 | 18.490 | 23.314 |
| 12663 | ENSG00000076043 | REXO2  | 1.1  | 0.0021061 | 0.0105665 | 50.280 | 2.377 | 48.088 | 52.807 | 45.887 | 2.076 | 43.973 | 48.094 |
| 12667 | ENSG00000148300 | REXO4  | -1.2 | 4.981E-05 | 0.0005121 | 29.014 | 1.120 | 27.722 | 29.707 | 36.539 | 2.812 | 34.474 | 39.741 |
| 12672 | ENSG00000035928 | RFC1   | -1.1 | 0.0046885 | 0.0201361 | 55.919 | 2.007 | 53.827 | 57.829 | 61.937 | 1.113 | 60.858 | 63.081 |
| 12674 | ENSG00000049541 | RFC2   | 1.1  | 0.0891484 | 0.1966813 | 73.684 | 4.833 | 68.981 | 78.637 | 70.602 | 3.584 | 66.574 | 73.435 |
| 12676 | ENSG00000133119 | RFC3   | 1.2  | 4.198E-05 | 0.0004437 | 75.011 | 1.871 | 73.257 | 76.981 | 65.150 | 5.123 | 60.241 | 70.463 |
| 12679 | ENSG00000163918 | RFC4   | -1.1 | 0.0122908 | 0.043021  | 72.261 | 2.427 | 69.462 | 73.796 | 80.335 | 1.942 | 78.404 | 82.287 |
| 12682 | ENSG00000178882 | RFLNA  | -1.7 | 0.0001181 | 0.0010355 | 2.100  | 0.401 | 1.831  | 2.561  | 3.596  | 0.222 | 3.419  | 3.845  |
| 12685 | ENSG00000183688 | RFLNB  | 1.3  | 8.958E-06 | 0.0001213 | 26.145 | 2.148 | 23.935 | 28.225 | 21.134 | 0.228 | 20.878 | 21.316 |
| 12687 | ENSG00000169733 | RFNG   | -1.2 | 0.0113359 | 0.0403036 | 11.997 | 0.822 | 11.085 | 12.682 | 14.181 | 0.952 | 13.099 | 14.891 |
| 12688 | ENSG00000205853 | RFPL3S | -1.6 | 0.0133612 | 0.0460428 | 1.491  | 0.369 | 1.238  | 1.914  | 2.398  | 0.220 | 2.144  | 2.534  |
| 12689 | ENSG00000163933 | RFT1   | 1.1  | 0.1039662 | 0.2193315 | 11.928 | 0.538 | 11.348 | 12.410 | 11.165 | 0.728 | 10.552 | 11.970 |
| 12691 | ENSG00000162944 | RFTN2  | -2.1 | 8.675E-05 | 0.0008044 | 0.526  | 0.084 | 0.446  | 0.614  | 1.119  | 0.276 | 0.801  | 1.306  |
| 12693 | ENSG00000080298 | RFX3   | -1.8 | 2.39E-12  | 2.418E-10 | 3.846  | 0.093 | 3.743  | 3.926  | 7.065  | 0.982 | 6.368  | 8.188  |
| 12695 | ENSG00000133111 | RFXAP  | 1.1  | 0.040827  | 0.1086215 | 23.171 | 1.221 | 22.231 | 24.551 | 21.134 | 0.575 | 20.553 | 21.703 |
| 12700 | ENSG00000143344 | RGL1   | 1.4  | 0.0044581 | 0.0193481 | 2.112  | 0.161 | 1.938  | 2.256  | 1.565  | 0.132 | 1.434  | 1.699  |
| 12702 | ENSG00000237441 | RGL2   | -1.1 | 0.0116667 | 0.0412974 | 30.888 | 0.396 | 30.447 | 31.213 | 34.871 | 3.169 | 32.047 | 38.299 |
| 12704 | ENSG00000205517 | RGL3   | -1.2 | 0.0076406 | 0.0295208 | 13.529 | 0.659 | 12.772 | 13.982 | 16.047 | 1.207 | 14.667 | 16.903 |
| 12705 | ENSG00000182175 | RGMA   | -1.3 | 3.239E-06 | 5.091E-05 | 6.726  | 0.525 | 6.123  | 7.083  | 8.855  | 0.594 | 8.382  | 9.521  |
| 12706 | ENSG00000107185 | RGP1   | -1.1 | 0.0098155 | 0.0359171 | 22.351 | 0.698 | 21.620 | 23.009 | 25.055 | 1.050 | 23.851 | 25.781 |
| 12707 | ENSG00000148908 | RGS10  | -1.3 | 0.0049591 | 0.0210155 | 17.317 | 1.682 | 15.566 | 18.921 | 22.363 | 3.450 | 19.350 | 26.126 |
| 12708 | ENSG00000169220 | RGS14  | -1.2 | 0.0068387 | 0.0269666 | 12.635 | 1.348 | 11.143 | 13.765 | 15.121 | 0.652 | 14.372 | 15.570 |
| 12709 | ENSG00000143333 | RGS16  | -1.2 | 0.0134614 | 0.0463033 | 8.155  | 0.882 | 7.244  | 9.003  | 10.392 | 2.362 | 7.807  | 12.437 |
| 12710 | ENSG00000171700 | RGS19  | -1.2 | 0.1023947 | 0.2166919 | 6.210  | 1.091 | 4.951  | 6.848  | 7.525  | 1.194 | 6.170  | 8.424  |
| 12712 | ENSG00000147509 | RGS20  | 1.8  | 0.0030495 | 0.0142942 | 1.454  | 0.225 | 1.296  | 1.711  | 0.820  | 0.208 | 0.637  | 1.046  |

|       | A               | B          | C    | D         | E         | F       | G     | H       | I       | J       | K     | L       | M       |
|-------|-----------------|------------|------|-----------|-----------|---------|-------|---------|---------|---------|-------|---------|---------|
| 12716 | ENSG00000138835 | RGS3       | 1.1  | 0.0297083 | 0.0855972 | 4.789   | 0.127 | 4.645   | 4.881   | 4.348   | 0.499 | 3.772   | 4.638   |
| 12717 | ENSG00000143248 | RGS5       | 1.7  | 2.40E-16  | 6.45E-14  | 40.607  | 2.922 | 37.274  | 42.723  | 24.982  | 0.599 | 24.516  | 25.658  |
| 12718 | ENSG00000182732 | RGS6       | 1.2  | 0.0871149 | 0.1933616 | 1.011   | 0.113 | 0.934   | 1.140   | 0.837   | 0.109 | 0.765   | 0.963   |
| 12719 | ENSG00000186479 | RGS7BP     | -1.3 | 0.0336802 | 0.0942166 | 1.206   | 0.102 | 1.113   | 1.315   | 1.633   | 0.199 | 1.448   | 1.844   |
| 12723 | ENSG00000108370 | RGS9       | 1.3  | 7.888E-05 | 0.0007453 | 6.760   | 0.218 | 6.632   | 7.012   | 5.409   | 0.365 | 5.014   | 5.732   |
| 12724 | ENSG00000144468 | RHBDD1     | 1.3  | 1.721E-06 | 2.973E-05 | 14.899  | 0.419 | 14.539  | 15.358  | 11.865  | 0.978 | 10.795  | 12.713  |
| 12726 | ENSG00000007384 | RHBDF1     | 1.1  | 0.0258878 | 0.0769626 | 20.836  | 1.316 | 20.023  | 22.354  | 19.131  | 2.013 | 17.635  | 21.420  |
| 12727 | ENSG00000141314 | RHBDL3     | -1.2 | 0.0460296 | 0.1191641 | 6.127   | 0.769 | 5.273   | 6.766   | 7.279   | 1.395 | 5.837   | 8.621   |
| 12728 | ENSG00000167550 | RHEBL1     | 1.2  | 0.0373326 | 0.1014797 | 11.060  | 0.730 | 10.625  | 11.903  | 9.321   | 0.594 | 8.788   | 9.961   |
| 12729 | ENSG00000067560 | RHOA       | -1.1 | 0.0209659 | 0.0654839 | 406.131 | 2.547 | 404.141 | 409.002 | 438.799 | 3.973 | 434.742 | 442.683 |
| 12733 | ENSG00000164292 | RHOBTB3    | 1.1  | 0.0751038 | 0.1726091 | 11.756  | 1.244 | 10.564  | 13.047  | 10.762  | 1.571 | 9.037   | 12.111  |
| 12734 | ENSG00000155366 | RHOC       | -1.1 | 0.1078612 | 0.2254117 | 13.680  | 0.658 | 12.939  | 14.194  | 15.254  | 0.382 | 14.988  | 15.692  |
| 12736 | ENSG00000139725 | RHOF       | -1.2 | 0.0085339 | 0.0320815 | 5.664   | 0.151 | 5.494   | 5.784   | 6.763   | 0.397 | 6.345   | 7.135   |
| 12737 | ENSG00000177105 | RHOG       | -1.3 | 0.0004913 | 0.0033061 | 16.677  | 1.097 | 15.801  | 17.908  | 21.674  | 1.366 | 20.306  | 23.038  |
| 12738 | ENSG00000119729 | RHOQ       | 1.1  | 0.0248712 | 0.0747151 | 44.785  | 0.467 | 44.247  | 45.076  | 42.196  | 2.600 | 39.337  | 44.420  |
| 12741 | ENSG00000258568 | RHOQP1     | -1.3 | 0.100185  | 0.2135386 | 6.423   | 1.789 | 4.721   | 8.287   | 8.569   | 0.712 | 8.104   | 9.388   |
| 12742 | ENSG00000232742 | RHOQP2     | 1.3  | 0.0677706 | 0.159861  | 15.736  | 1.509 | 14.182  | 17.196  | 12.673  | 3.942 | 8.239   | 15.779  |
| 12743 | ENSG00000230756 | RHOQP3     | 1.3  | 0.0380507 | 0.1029519 | 11.623  | 0.955 | 10.646  | 12.555  | 8.972   | 1.837 | 6.883   | 10.336  |
| 12744 | ENSG00000126858 | RHOT1      | -1.1 | 0.0021264 | 0.0106372 | 30.099  | 0.175 | 29.940  | 30.286  | 34.397  | 1.923 | 32.971  | 36.584  |
| 12750 | ENSG00000242756 | RHOT1P3    | -1.3 | 0.1101676 | 0.2287323 | 15.839  | 3.182 | 12.454  | 18.770  | 20.298  | 3.255 | 17.480  | 23.861  |
| 12751 | ENSG00000140983 | RHOT2      | -1.1 | 0.0135555 | 0.0465608 | 38.381  | 0.200 | 38.152  | 38.528  | 42.633  | 1.263 | 41.241  | 43.705  |
| 12752 | ENSG00000116574 | RHOU       | -1.2 | 0.003189  | 0.0147931 | 8.109   | 0.138 | 7.970   | 8.245   | 10.056  | 1.321 | 8.774   | 11.413  |
| 12753 | ENSG00000104140 | RHOV       | -1.3 | 0.0709029 | 0.1653358 | 2.782   | 0.558 | 2.338   | 3.408   | 3.682   | 0.203 | 3.552   | 3.915   |
| 12757 | ENSG00000258545 | RHOXF1-AS1 | 1.5  | 0.000304  | 0.0022328 | 6.866   | 0.569 | 6.454   | 7.515   | 4.676   | 0.822 | 3.761   | 5.351   |
| 12759 | ENSG00000158106 | RHPN1      | -1.3 | 0.0005368 | 0.0035451 | 9.633   | 1.148 | 8.464   | 10.758  | 12.476  | 1.318 | 11.200  | 13.833  |
| 12761 | ENSG00000131941 | RHPN2      | -1.2 | 1.959E-06 | 3.33E-05  | 20.184  | 0.047 | 20.151  | 20.238  | 25.595  | 0.387 | 25.148  | 25.829  |
| 12762 | ENSG00000107036 | RIC1       | 1.1  | 0.0022379 | 0.011077  | 21.651  | 0.444 | 21.379  | 22.163  | 19.873  | 0.663 | 19.252  | 20.572  |
| 12763 | ENSG00000177963 | RIC8A      | 1.1  | 0.0979423 | 0.2100822 | 17.358  | 0.099 | 17.250  | 17.443  | 16.568  | 1.260 | 15.428  | 17.921  |
| 12764 | ENSG00000132541 | RIDA       | -1.1 | 0.0067225 | 0.0266273 | 54.669  | 2.464 | 51.855  | 56.439  | 63.412  | 1.351 | 61.881  | 64.433  |
| 12770 | ENSG00000080345 | RIF1       | -1.1 | 0.0635497 | 0.1522189 | 35.764  | 0.284 | 35.436  | 35.934  | 38.511  | 0.436 | 38.062  | 38.934  |
| 12771 | ENSG00000188026 | RILPL1     | 1.1  | 0.1010545 | 0.2146076 | 3.696   | 0.336 | 3.389   | 4.056   | 3.379   | 0.344 | 3.139   | 3.773   |
| 12773 | ENSG00000060709 | RIMBP2     | 2.3  | 0.0336411 | 0.0941382 | 0.167   | 0.111 | 0.087   | 0.294   | 0.073   | 0.079 | 0.020   | 0.164   |
| 12775 | ENSG00000177181 | RIMKLA     | -1.4 | 3.129E-05 | 0.0003456 | 2.392   | 0.426 | 1.907   | 2.704   | 3.468   | 0.138 | 3.309   | 3.549   |
| 12776 | ENSG00000166532 | RIMKLB     | -1.1 | 0.0014477 | 0.0078529 | 74.585  | 2.330 | 71.984  | 76.480  | 83.730  | 3.050 | 80.441  | 86.464  |
| 12778 | ENSG00000117016 | RIMS3      | 1.1  | 0.0443485 | 0.1158206 | 29.382  | 2.844 | 26.162  | 31.549  | 27.755  | 0.827 | 27.103  | 28.686  |
| 12779 | ENSG00000101098 | RIMS4      | -1.3 | 6.201E-06 | 8.873E-05 | 22.921  | 2.281 | 21.072  | 25.470  | 29.593  | 1.800 | 27.793  | 31.394  |
| 12781 | ENSG00000132669 | RIN2       | -1.4 | 0.1136856 | 0.2335924 | 0.508   | 0.073 | 0.438   | 0.585   | 0.710   | 0.202 | 0.495   | 0.898   |
| 12783 | ENSG00000100599 | RIN3       | 1.3  | 0.1088303 | 0.2267086 | 0.751   | 0.055 | 0.697   | 0.806   | 0.612   | 0.020 | 0.594   | 0.634   |
| 12785 | ENSG00000204227 | RING1      | -1.1 | 0.0375899 | 0.1019986 | 24.364  | 0.984 | 23.648  | 25.486  | 28.011  | 0.468 | 27.539  | 28.475  |
| 12787 | ENSG00000135249 | RINT1      | -1.2 | 0.0001816 | 0.001478  | 17.299  | 1.532 | 15.530  | 18.190  | 21.731  | 1.376 | 20.353  | 23.104  |
| 12788 | ENSG00000124784 | RIOK1      | -1.3 | 1.428E-06 | 2.557E-05 | 21.004  | 1.946 | 18.941  | 22.806  | 28.814  | 2.509 | 26.531  | 31.501  |
| 12792 | ENSG00000058729 | RIOK2      | -1.1 | 0.0158864 | 0.052839  | 19.941  | 0.819 | 18.999  | 20.488  | 22.719  | 0.370 | 22.385  | 23.117  |

|       | A               | B           | C    | D         | E         | F      | G     | H      | I      | J      | K     | L      | M      |
|-------|-----------------|-------------|------|-----------|-----------|--------|-------|--------|--------|--------|-------|--------|--------|
| 12794 | ENSG00000101782 | RIOK3       | -1.2 | 0.0019916 | 0.0101426 | 13.877 | 0.720 | 13.108 | 14.534 | 16.454 | 1.240 | 15.287 | 17.755 |
| 12795 | ENSG00000170854 | RIOX2       | 1.4  | 1.97E-06  | 3.346E-05 | 7.375  | 0.600 | 6.713  | 7.881  | 5.246  | 0.187 | 5.034  | 5.385  |
| 12796 | ENSG00000137275 | RIPK1       | 1.3  | 3.471E-06 | 5.418E-05 | 17.791 | 1.878 | 16.057 | 19.786 | 13.772 | 0.582 | 13.160 | 14.318 |
| 12799 | ENSG00000183421 | RIPK4       | -1.4 | 0.0012233 | 0.0069012 | 3.978  | 0.526 | 3.590  | 4.576  | 5.542  | 0.763 | 4.759  | 6.282  |
| 12800 | ENSG00000039523 | RIPOR1      | 1.3  | 0.0001311 | 0.0011277 | 6.686  | 0.538 | 6.166  | 7.240  | 5.182  | 0.739 | 4.408  | 5.880  |
| 12802 | ENSG00000111913 | RIPOR2      | 1.6  | 1.00E-11  | 8.568E-10 | 16.292 | 1.672 | 14.580 | 17.921 | 10.335 | 0.855 | 9.435  | 11.136 |
| 12803 | ENSG00000042062 | RIPOR3      | -1.3 | 0.0101916 | 0.0370213 | 1.618  | 0.071 | 1.537  | 1.671  | 2.227  | 0.431 | 1.833  | 2.688  |
| 12807 | ENSG00000183145 | RIPPLY3     | 1.3  | 0.01575   | 0.0524577 | 4.940  | 0.527 | 4.332  | 5.268  | 3.795  | 0.589 | 3.348  | 4.462  |
| 12810 | ENSG00000152214 | RIT2        | -1.4 | 0.0381795 | 0.1031518 | 2.322  | 0.126 | 2.177  | 2.405  | 3.319  | 0.118 | 3.183  | 3.396  |
| 12812 | ENSG00000117000 | RLF         | -1.2 | 8.109E-06 | 0.0001114 | 16.836 | 0.885 | 16.203 | 17.847 | 21.017 | 0.966 | 20.280 | 22.110 |
| 12814 | ENSG00000131263 | RLIM        | -1.2 | 4.324E-08 | 1.322E-06 | 27.505 | 0.751 | 27.018 | 28.370 | 34.838 | 1.414 | 33.723 | 36.429 |
| 12818 | ENSG00000107018 | RLN1        | 1.5  | 0.0633168 | 0.1518974 | 3.109  | 0.698 | 2.412  | 3.808  | 2.079  | 1.049 | 0.909  | 2.934  |
| 12821 | ENSG00000107014 | RLN2        | 1.2  | 0.0664587 | 0.1575219 | 11.411 | 0.435 | 10.917 | 11.736 | 9.753  | 1.553 | 8.771  | 11.544 |
| 12822 | ENSG00000176623 | RMDN1       | 1.1  | 0.0376471 | 0.1021211 | 19.869 | 0.129 | 19.743 | 20.002 | 18.607 | 1.102 | 17.784 | 19.859 |
| 12823 | ENSG00000115841 | RMDN2       | 1.6  | 0.0011464 | 0.0065592 | 1.597  | 0.124 | 1.477  | 1.724  | 1.016  | 0.131 | 0.918  | 1.165  |
| 12824 | ENSG00000175643 | RMI2        | -1.1 | 0.0215702 | 0.0669151 | 59.058 | 4.268 | 55.975 | 63.930 | 66.056 | 2.522 | 63.822 | 68.790 |
| 12826 | ENSG00000155906 | RMND1       | 1.2  | 0.0028182 | 0.0134037 | 23.673 | 2.079 | 22.351 | 26.070 | 20.038 | 1.164 | 18.916 | 21.239 |
| 12828 | ENSG00000129538 | RNASE1      | 1.7  | 0.0011144 | 0.0064285 | 4.916  | 0.497 | 4.353  | 5.294  | 2.914  | 0.837 | 2.372  | 3.879  |
| 12829 | ENSG00000172602 | RND1        | -1.2 | 0.0124542 | 0.0434396 | 6.547  | 0.323 | 6.298  | 6.913  | 8.141  | 0.799 | 7.223  | 8.680  |
| 12833 | ENSG00000108830 | RND2        | -1.1 | 0.0110525 | 0.0394952 | 50.015 | 3.300 | 46.671 | 53.268 | 57.852 | 6.673 | 50.147 | 61.756 |
| 12834 | ENSG00000115963 | RND3        | 1.4  | 6.86E-09  | 2.667E-07 | 29.684 | 1.408 | 28.354 | 31.159 | 22.289 | 1.271 | 21.000 | 23.542 |
| 12835 | ENSG00000128482 | RNF112      | -1.4 | 0.005498  | 0.0227355 | 2.055  | 0.385 | 1.658  | 2.427  | 2.979  | 0.342 | 2.698  | 3.359  |
| 12837 | ENSG00000125352 | RNF113A     | -1.2 | 0.0196053 | 0.0620017 | 16.021 | 1.666 | 14.195 | 17.460 | 19.558 | 1.364 | 18.033 | 20.661 |
| 12838 | ENSG00000124226 | RNF114      | 1.1  | 0.0019406 | 0.0099362 | 46.784 | 1.453 | 45.170 | 47.988 | 43.024 | 1.367 | 41.530 | 44.212 |
| 12839 | ENSG00000070423 | RNF126      | -1.2 | 0.0584648 | 0.1427685 | 19.356 | 2.119 | 17.004 | 21.116 | 22.998 | 3.057 | 20.861 | 26.499 |
| 12840 | ENSG00000082996 | RNF13       | 1.1  | 0.1009088 | 0.2144425 | 24.187 | 1.451 | 22.727 | 25.630 | 23.030 | 0.671 | 22.280 | 23.575 |
| 12841 | ENSG00000113269 | RNF130      | 1.2  | 1.281E-05 | 0.0001646 | 20.757 | 0.765 | 19.939 | 21.455 | 18.026 | 0.556 | 17.636 | 18.662 |
| 12842 | ENSG00000181481 | RNF135      | 1.2  | 0.0045809 | 0.0197697 | 10.912 | 0.789 | 10.234 | 11.777 | 9.175  | 1.089 | 8.018  | 10.179 |
| 12843 | ENSG00000250853 | RNF138P1    | 1.3  | 0.0559603 | 0.1383353 | 12.617 | 1.210 | 11.222 | 13.394 | 9.892  | 1.338 | 8.558  | 11.235 |
| 12845 | ENSG00000170881 | RNF139      | 1.1  | 0.1048301 | 0.220631  | 31.821 | 1.531 | 30.076 | 32.940 | 30.214 | 0.649 | 29.507 | 30.781 |
| 12849 | ENSG00000013561 | RNF14       | 1.1  | 0.0243009 | 0.0733799 | 14.542 | 0.678 | 13.772 | 15.049 | 13.318 | 0.934 | 12.674 | 14.390 |
| 12853 | ENSG00000110315 | RNF141      | 1.2  | 3.143E-05 | 0.0003468 | 20.437 | 0.763 | 19.758 | 21.264 | 17.581 | 0.161 | 17.476 | 17.766 |
| 12855 | ENSG00000228203 | RNF144A-AS1 | 1.5  | 0.0209343 | 0.0654217 | 1.210  | 0.256 | 0.930  | 1.429  | 0.809  | 0.082 | 0.718  | 0.875  |
| 12857 | ENSG00000145860 | RNF145      | -1.2 | 3.156E-06 | 4.985E-05 | 46.542 | 1.601 | 44.703 | 47.615 | 56.140 | 1.873 | 54.745 | 58.268 |
| 12858 | ENSG00000163162 | RNF149      | -1.1 | 0.057883  | 0.1418393 | 18.061 | 0.496 | 17.585 | 18.574 | 20.218 | 1.945 | 18.658 | 22.397 |
| 12859 | ENSG00000141576 | RNF157      | 1.2  | 0.0137405 | 0.0470623 | 7.026  | 1.070 | 5.791  | 7.669  | 6.002  | 0.198 | 5.873  | 6.230  |
| 12860 | ENSG00000141622 | RNF165      | -1.2 | 0.0183137 | 0.0589081 | 1.639  | 0.222 | 1.474  | 1.892  | 2.054  | 0.107 | 1.986  | 2.178  |
| 12861 | ENSG00000158717 | RNF166      | -1.2 | 0.00091   | 0.0054019 | 9.234  | 0.653 | 8.511  | 9.778  | 11.519 | 0.590 | 11.027 | 12.173 |
| 12862 | ENSG00000108523 | RNF167      | -1.1 | 0.0002903 | 0.0021545 | 67.495 | 0.822 | 66.720 | 68.357 | 78.362 | 1.930 | 76.449 | 80.308 |
| 12864 | ENSG00000166439 | RNF169      | -1.3 | 5.319E-06 | 7.836E-05 | 11.324 | 1.139 | 10.078 | 12.313 | 15.128 | 1.522 | 13.440 | 16.394 |
| 12865 | ENSG00000120925 | RNF170      | 1.1  | 0.0591675 | 0.1440892 | 13.119 | 0.537 | 12.770 | 13.737 | 12.079 | 1.202 | 10.942 | 13.337 |

|       | A               | B       | C    | D         | E         | F        | G      | H        | I        | J        | K      | L        | M        |
|-------|-----------------|---------|------|-----------|-----------|----------|--------|----------|----------|----------|--------|----------|----------|
| 12867 | ENSG00000180537 | RNF182  | 1.1  | 0.0883879 | 0.1954123 | 7.702    | 0.114  | 7.617    | 7.832    | 6.928    | 0.314  | 6.577    | 7.181    |
| 12868 | ENSG00000138942 | RNF185  | 1.1  | 0.0999995 | 0.2132507 | 29.571   | 2.176  | 27.388   | 31.739   | 28.187   | 0.907  | 27.508   | 29.217   |
| 12871 | ENSG00000168159 | RNF187  | 1.4  | 2.936E-09 | 1.267E-07 | 47.537   | 1.684  | 46.396   | 49.471   | 35.770   | 2.602  | 32.869   | 37.898   |
| 12873 | ENSG00000034677 | RNF19A  | 1.4  | 1.931E-08 | 6.559E-07 | 14.816   | 0.763  | 14.081   | 15.604   | 10.813   | 0.852  | 9.888    | 11.566   |
| 12874 | ENSG00000116514 | RNF19B  | -1.1 | 0.0571986 | 0.1405287 | 23.435   | 1.420  | 22.433   | 25.060   | 26.400   | 1.084  | 25.229   | 27.367   |
| 12877 | ENSG00000158286 | RNF207  | -1.7 | 5.576E-05 | 0.0005597 | 1.087    | 0.148  | 0.920    | 1.199    | 1.890    | 0.236  | 1.622    | 2.066    |
| 12878 | ENSG00000178222 | RNF212  | 1.7  | 0.0062961 | 0.0253056 | 1.027    | 0.224  | 0.856    | 1.281    | 0.628    | 0.225  | 0.375    | 0.807    |
| 12880 | ENSG00000173821 | RNF213  | 1.1  | 0.0415699 | 0.1101131 | 14.840   | 0.205  | 14.630   | 15.039   | 14.217   | 0.337  | 14.008   | 14.605   |
| 12881 | ENSG00000099999 | RNF215  | -1.2 | 0.0056382 | 0.0232527 | 3.527    | 0.211  | 3.338    | 3.755    | 4.327    | 0.211  | 4.093    | 4.505    |
| 12882 | ENSG00000146373 | RNF217  | 1.2  | 0.0183463 | 0.0589682 | 2.971    | 0.212  | 2.821    | 3.214    | 2.609    | 0.236  | 2.338    | 2.766    |
| 12883 | ENSG00000187147 | RNF220  | -1.1 | 0.005571  | 0.0230036 | 22.366   | 1.165  | 21.094   | 23.380   | 25.110   | 0.488  | 24.601   | 25.574   |
| 12884 | ENSG00000173456 | RNF26   | -1.1 | 0.0002372 | 0.001833  | 95.114   | 0.374  | 94.726   | 95.472   | 110.776  | 6.995  | 104.202  | 118.127  |
| 12887 | ENSG00000092098 | RNF31   | -1.1 | 0.0873496 | 0.1937267 | 6.641    | 0.409  | 6.283    | 7.087    | 7.651    | 1.076  | 6.901    | 8.884    |
| 12888 | ENSG00000170633 | RNF34   | -1.2 | 0.0001078 | 0.0009596 | 21.985   | 0.910  | 21.070   | 22.889   | 26.662   | 1.121  | 25.781   | 27.924   |
| 12889 | ENSG00000137075 | RNF38   | 1.1  | 0.0804127 | 0.1819669 | 31.402   | 1.223  | 30.453   | 32.783   | 30.072   | 2.384  | 28.054   | 32.702   |
| 12891 | ENSG00000204618 | RNF39   | -1.5 | 0.064394  | 0.1536782 | 1.031    | 0.386  | 0.602    | 1.351    | 1.572    | 0.308  | 1.276    | 1.891    |
| 12895 | ENSG00000103549 | RNF40   | -1.2 | 0.0002764 | 0.002073  | 17.599   | 0.347  | 17.361   | 17.998   | 20.910   | 0.871  | 19.975   | 21.699   |
| 12896 | ENSG00000114125 | RNF7    | 1.1  | 0.0361079 | 0.0991386 | 56.751   | 2.510  | 55.021   | 59.630   | 53.590   | 0.673  | 52.852   | 54.171   |
| 12897 | ENSG00000112130 | RNF8    | -1.1 | 0.0012111 | 0.0068551 | 16.601   | 0.734  | 16.020   | 17.425   | 19.417   | 0.126  | 19.291   | 19.544   |
| 12898 | ENSG00000189050 | RNFT1   | 1.4  | 0.0048997 | 0.0208159 | 5.024    | 0.677  | 4.252    | 5.517    | 3.749    | 1.024  | 2.577    | 4.468    |
| 12899 | ENSG00000111880 | RNGTT   | -1.1 | 0.0036403 | 0.0164622 | 32.971   | 0.897  | 32.337   | 33.998   | 37.401   | 1.896  | 35.224   | 38.686   |
| 12900 | ENSG00000176393 | RNPEP   | -1.1 | 0.0067174 | 0.0266135 | 47.667   | 1.052  | 46.464   | 48.411   | 53.681   | 2.238  | 51.692   | 56.104   |
| 12901 | ENSG00000205937 | RNPS1   | -1.1 | 9.989E-05 | 0.0009035 | 45.144   | 1.640  | 43.302   | 46.446   | 52.744   | 3.582  | 50.524   | 56.877   |
| 12903 | ENSG00000250896 | RNPS1P1 | -1.1 | 0.0575375 | 0.1411562 | 79.364   | 3.340  | 75.511   | 81.434   | 89.056   | 2.233  | 86.625   | 91.014   |
| 12905 | ENSG00000169855 | ROBO1   | -1.1 | 0.0254896 | 0.0760729 | 63.654   | 3.948  | 59.663   | 67.557   | 69.464   | 2.317  | 67.404   | 71.972   |
| 12912 | ENSG00000185008 | ROBO2   | -2.1 | 8.34E-11  | 5.486E-09 | 0.853    | 0.092  | 0.751    | 0.930    | 1.804    | 0.207  | 1.566    | 1.924    |
| 12913 | ENSG00000067900 | ROCK1   | -1.1 | 0.0206964 | 0.0647866 | 36.725   | 0.325  | 36.420   | 37.067   | 40.237   | 1.671  | 38.325   | 41.416   |
| 12918 | ENSG00000134318 | ROCK2   | 1.2  | 6.061E-07 | 1.264E-05 | 19.150   | 0.360  | 18.753   | 19.458   | 16.129   | 0.549  | 15.568   | 16.665   |
| 12920 | ENSG00000069667 | RORA    | -1.5 | 1.035E-07 | 2.814E-06 | 2.162    | 0.153  | 2.003    | 2.308    | 3.340    | 0.341  | 2.946    | 3.545    |
| 12921 | ENSG00000198963 | RORB    | -1.2 | 0.0191201 | 0.0608398 | 1.909    | 0.252  | 1.693    | 2.186    | 2.391    | 0.335  | 2.006    | 2.610    |
| 12922 | ENSG00000132383 | RPA1    | -1.1 | 0.0165474 | 0.0544911 | 85.891   | 0.497  | 85.544   | 86.459   | 93.921   | 1.701  | 92.225   | 95.628   |
| 12923 | ENSG00000129197 | RPAIN   | -1.1 | 0.0005134 | 0.0034307 | 24.435   | 0.938  | 23.404   | 25.237   | 28.318   | 0.899  | 27.298   | 28.996   |
| 12925 | ENSG00000103932 | RPAP1   | -1.2 | 1.039E-05 | 0.0001376 | 30.929   | 0.534  | 30.533   | 31.536   | 37.273   | 2.673  | 35.386   | 40.332   |
| 12931 | ENSG00000235376 | RPEL1   | -1.2 | 0.0477473 | 0.1226161 | 4.878    | 0.495  | 4.512    | 5.441    | 6.177    | 1.354  | 4.662    | 7.269    |
| 12932 | ENSG00000117133 | RPF1    | 1.1  | 0.0309932 | 0.0885452 | 59.199   | 1.588  | 58.025   | 61.006   | 55.401   | 2.694  | 52.314   | 57.271   |
| 12933 | ENSG00000142676 | RPL11   | -1.1 | 0.033516  | 0.0938815 | 1207.600 | 26.993 | 1176.490 | 1224.812 | 1297.421 | 34.278 | 1266.896 | 1334.505 |
| 12935 | ENSG00000197958 | RPL12   | -1.1 | 0.0009727 | 0.0057322 | 350.931  | 5.664  | 345.651  | 356.912  | 392.969  | 8.058  | 384.899  | 401.016  |
| 12938 | ENSG00000185834 | RPL12P4 | -1.1 | 0.0413805 | 0.1097317 | 1339.678 | 48.957 | 1293.799 | 1391.221 | 1445.207 | 40.887 | 1407.921 | 1488.931 |
| 12939 | ENSG00000219932 | RPL12P8 | -1.2 | 0.0341612 | 0.0953257 | 21.100   | 0.775  | 20.317   | 21.867   | 26.268   | 0.824  | 25.326   | 26.857   |
| 12940 | ENSG00000167526 | RPL13   | -1.1 | 0.0630132 | 0.1513623 | 258.786  | 13.212 | 250.750  | 274.035  | 284.531  | 16.269 | 270.055  | 302.138  |
| 12943 | ENSG00000240370 | RPL13P5 | 1.4  | 0.0056542 | 0.0233013 | 6.370    | 0.642  | 5.631    | 6.795    | 4.660    | 0.721  | 3.832    | 5.148    |
| 12944 | ENSG00000265681 | RPL17   | -1.1 | 0.0129206 | 0.0447801 | 98.626   | 2.783  | 96.604   | 101.800  | 109.460  | 2.437  | 108.004  | 112.273  |
| 12947 | ENSG00000063177 | RPL18   | -1.1 | 0.013809  | 0.0472682 | 332.748  | 7.675  | 326.334  | 341.251  | 362.923  | 7.484  | 357.921  | 371.527  |

|       | A               | B         | C    | D         | E         | F        | G      | H        | I        | J        | K      | L        | M        |
|-------|-----------------|-----------|------|-----------|-----------|----------|--------|----------|----------|----------|--------|----------|----------|
| 12953 | ENSG00000220749 | RPL21P28  | -1.1 | 0.0550339 | 0.1368002 | 196.797  | 5.654  | 190.367  | 200.991  | 217.470  | 7.290  | 212.094  | 225.767  |
| 12955 | ENSG00000116251 | RPL22     | 1    | 0.1140843 | 0.2341352 | 234.620  | 4.329  | 229.703  | 237.859  | 229.277  | 11.241 | 222.672  | 242.256  |
| 12956 | ENSG00000163584 | RPL22L1   | -1.3 | 2.361E-09 | 1.054E-07 | 62.061   | 4.050  | 57.419   | 64.872   | 84.211   | 4.231  | 79.786   | 88.218   |
| 12958 | ENSG00000243422 | RPL23AP49 | 1.5  | 0.0859238 | 0.1914916 | 2.472    | 0.595  | 2.077    | 3.157    | 1.683    | 0.288  | 1.365    | 1.924    |
| 12960 | ENSG00000243964 | RPL23AP65 | -1.1 | 0.0589496 | 0.1436828 | 139.140  | 8.391  | 131.975  | 148.371  | 158.239  | 18.000 | 141.611  | 177.352  |
| 12961 | ENSG00000184319 | RPL23AP82 | 1.3  | 0.0024871 | 0.0121188 | 7.351    | 1.145  | 6.273    | 8.552    | 5.921    | 0.678  | 5.486    | 6.702    |
| 12962 | ENSG00000114391 | RPL24     | -1.1 | 0.0033727 | 0.0154756 | 434.072  | 11.185 | 421.644  | 443.329  | 480.001  | 14.127 | 463.851  | 490.064  |
| 12963 | ENSG00000181524 | RPL24P4   | -1.1 | 0.0923595 | 0.20191   | 1067.692 | 26.586 | 1037.487 | 1087.545 | 1146.566 | 36.888 | 1105.629 | 1177.225 |
| 12964 | ENSG00000236801 | RPL24P8   | -1.2 | 6.356E-05 | 0.0006249 | 240.549  | 4.267  | 236.000  | 244.464  | 292.429  | 6.565  | 286.419  | 299.435  |
| 12965 | ENSG00000236264 | RPL26P30  | -1.2 | 0.0327094 | 0.092287  | 32.760   | 1.101  | 31.876   | 33.993   | 39.307   | 5.726  | 35.318   | 45.868   |
| 12967 | ENSG00000131469 | RPL27     | -1.1 | 0.0019145 | 0.0098293 | 697.721  | 10.241 | 687.653  | 708.126  | 769.258  | 10.213 | 758.180  | 778.299  |
| 12968 | ENSG00000108107 | RPL28     | -1.1 | 0.049832  | 0.1266239 | 155.278  | 2.026  | 152.939  | 156.493  | 166.902  | 2.610  | 164.131  | 169.314  |
| 12969 | ENSG00000162244 | RPL29     | -1.1 | 0.0011411 | 0.0065335 | 351.495  | 6.610  | 345.888  | 358.784  | 395.995  | 16.236 | 379.746  | 412.218  |
| 12972 | ENSG00000224858 | RPL29P11  | -1.1 | 0.0628363 | 0.1510448 | 159.971  | 11.805 | 151.321  | 173.420  | 181.346  | 12.437 | 167.341  | 191.102  |
| 12973 | ENSG00000100316 | RPL3      | -1.1 | 0.0328701 | 0.0927017 | 1064.730 | 10.757 | 1052.615 | 1073.163 | 1143.402 | 19.694 | 1124.223 | 1163.574 |
| 12974 | ENSG00000071082 | RPL31     | -1.1 | 0.0010394 | 0.0060641 | 288.939  | 1.028  | 287.830  | 289.862  | 323.947  | 6.933  | 316.012  | 328.830  |
| 12976 | ENSG00000251474 | RPL32P3   | -1.1 | 0.0195972 | 0.0619875 | 12.209   | 0.502  | 11.632   | 12.541   | 14.075   | 0.459  | 13.554   | 14.420   |
| 12978 | ENSG00000109475 | RPL34     | -1.1 | 3.1E-05   | 0.0003429 | 250.949  | 2.542  | 248.388  | 253.472  | 294.381  | 11.839 | 280.727  | 301.788  |
| 12979 | ENSG00000136942 | RPL35     | -1   | 0.1084842 | 0.226217  | 677.457  | 19.293 | 657.153  | 695.549  | 722.839  | 25.266 | 694.184  | 741.914  |
| 12981 | ENSG00000182899 | RPL35A    | -1.1 | 2.207E-05 | 0.0002587 | 416.921  | 8.878  | 407.835  | 425.576  | 481.348  | 13.215 | 471.088  | 496.259  |
| 12982 | ENSG00000145592 | RPL37     | -1.1 | 0.0474768 | 0.1220146 | 250.432  | 4.895  | 245.723  | 255.493  | 269.173  | 8.675  | 259.239  | 275.255  |
| 12984 | ENSG00000172809 | RPL38     | -1.1 | 0.0532955 | 0.1333808 | 220.087  | 1.495  | 218.479  | 221.436  | 237.575  | 11.657 | 224.734  | 247.490  |
| 12985 | ENSG00000198918 | RPL39     | -1.1 | 0.025728  | 0.0766358 | 104.108  | 5.236  | 98.208   | 108.205  | 115.255  | 3.339  | 113.029  | 119.095  |
| 12986 | ENSG00000163923 | RPL39L    | 1.1  | 0.0031384 | 0.0146266 | 156.497  | 3.889  | 152.276  | 159.937  | 143.113  | 8.035  | 135.011  | 151.080  |
| 12988 | ENSG00000227939 | RPL3P2    | -1.1 | 0.0822855 | 0.1855098 | 19.452   | 1.152  | 18.679   | 20.776   | 22.800   | 0.830  | 21.924   | 23.574   |
| 12989 | ENSG00000232573 | RPL3P4    | -1.1 | 0.016388  | 0.0540998 | 3244.633 | 87.722 | 3184.804 | 3345.333 | 3550.674 | 79.296 | 3459.451 | 3603.122 |
| 12994 | ENSG00000229117 | RPL41     | -1.1 | 0.0165377 | 0.0544803 | 546.188  | 6.963  | 538.681  | 552.436  | 596.611  | 14.563 | 583.223  | 612.117  |
| 12999 | ENSG00000234009 | RPL5P34   | 1.1  | 0.0387092 | 0.1042293 | 264.597  | 11.005 | 251.904  | 271.467  | 247.947  | 20.877 | 223.979  | 262.162  |
| 13001 | ENSG00000089009 | RPL6      | -1   | 0.0740076 | 0.1708093 | 257.519  | 8.706  | 250.508  | 267.264  | 275.110  | 7.242  | 270.329  | 283.442  |
| 13003 | ENSG00000148303 | RPL7A     | -1.1 | 0.0334046 | 0.0936937 | 642.929  | 9.955  | 635.287  | 654.187  | 694.084  | 21.984 | 668.700  | 706.870  |
| 13004 | ENSG00000213609 | RPL7AP50  | -1.1 | 0.0373646 | 0.1015504 | 107.942  | 2.323  | 106.072  | 110.543  | 122.453  | 12.434 | 109.008  | 133.538  |
| 13005 | ENSG00000242071 | RPL7AP6   | -1.1 | 0.0556601 | 0.1378502 | 1704.030 | 60.250 | 1663.731 | 1773.292 | 1836.005 | 39.677 | 1809.919 | 1881.665 |
| 13008 | ENSG00000146223 | RPL7L1    | -1.1 | 0.0687742 | 0.1616198 | 47.110   | 1.839  | 45.234   | 48.909   | 50.682   | 1.037  | 49.929   | 51.864   |
| 13009 | ENSG00000214485 | RPL7P1    | -1.1 | 0.0581775 | 0.1423153 | 1746.897 | 15.703 | 1731.023 | 1762.422 | 1875.282 | 16.323 | 1865.771 | 1894.130 |
| 13010 | ENSG00000231579 | RPL7P21   | -1.2 | 0.05653   | 0.1393518 | 22.907   | 1.270  | 21.449   | 23.774   | 27.692   | 1.764  | 26.108   | 29.592   |
| 13013 | ENSG00000161016 | RPL8      | -1   | 0.0970013 | 0.208646  | 1442.116 | 18.252 | 1430.386 | 1463.145 | 1529.765 | 10.430 | 1523.109 | 1541.786 |
| 13014 | ENSG00000163682 | RPL9      | -1.1 | 0.0019662 | 0.0100373 | 49.717   | 1.915  | 48.186   | 51.864   | 57.114   | 0.716  | 56.294   | 57.616   |

|       | A               | B        | C    | D         | E         | F        | G      | H        | I        | J        | K      | L        | M        |
|-------|-----------------|----------|------|-----------|-----------|----------|--------|----------|----------|----------|--------|----------|----------|
| 13017 | ENSG00000238103 | RPL9P7   | -1.1 | 0.0349186 | 0.0968002 | 2225.995 | 17.481 | 2205.971 | 2238.208 | 2398.493 | 37.645 | 2355.622 | 2426.150 |
| 13019 | ENSG00000237550 | RPL9P9   | -1.1 | 0.0165294 | 0.0544742 | 2743.516 | 27.274 | 2713.425 | 2766.611 | 2973.402 | 12.727 | 2961.800 | 2987.015 |
| 13020 | ENSG00000177600 | RPLP2    | -1.1 | 0.0079309 | 0.0304209 | 533.023  | 6.931  | 525.563  | 539.262  | 586.161  | 24.114 | 560.074  | 607.636  |
| 13022 | ENSG00000163902 | RPN1     | 1    | 0.0827878 | 0.1863193 | 137.642  | 4.458  | 132.527  | 140.692  | 134.207  | 3.061  | 130.674  | 136.076  |
| 13026 | ENSG00000118705 | RPN2     | -1.1 | 0.0307155 | 0.0878557 | 303.417  | 7.788  | 295.433  | 310.992  | 327.432  | 2.432  | 325.143  | 329.985  |
| 13028 | ENSG00000163684 | RPP14    | -1.3 | 7.65E-05  | 0.0007254 | 5.980    | 0.130  | 5.836    | 6.089    | 7.804    | 0.827  | 7.209    | 8.749    |
| 13033 | ENSG00000241370 | RPP21    | 1.3  | 0.0563626 | 0.139081  | 5.103    | 0.368  | 4.824    | 5.520    | 4.061    | 0.358  | 3.741    | 4.448    |
| 13036 | ENSG00000124787 | RPP40    | 1.2  | 0.0210869 | 0.0657892 | 15.321   | 1.483  | 13.896   | 16.856   | 13.278   | 0.951  | 12.190   | 13.950   |
| 13037 | ENSG00000141425 | RPRD1A   | -1.1 | 0.00455   | 0.0196662 | 77.115   | 3.984  | 74.622   | 81.710   | 85.707   | 0.192  | 85.536   | 85.915   |
| 13039 | ENSG00000177519 | RPRM     | 1.5  | 0.0002194 | 0.0017204 | 11.108   | 1.896  | 9.642    | 13.249   | 7.618    | 0.725  | 6.968    | 8.399    |
| 13044 | ENSG00000110700 | RPS13    | -1.1 | 0.0165204 | 0.0544562 | 508.153  | 18.565 | 489.199  | 526.302  | 553.723  | 9.391  | 543.702  | 562.321  |
| 13045 | ENSG00000228929 | RPS13P2  | -1.1 | 0.0882897 | 0.1952208 | 238.711  | 5.800  | 232.427  | 243.857  | 261.775  | 13.993 | 247.774  | 275.760  |
| 13046 | ENSG00000164587 | RPS14    | -1.1 | 0.0024031 | 0.011767  | 404.726  | 3.992  | 401.375  | 409.142  | 448.173  | 9.322  | 437.582  | 455.137  |
| 13047 | ENSG00000134419 | RPS15A   | -1.1 | 0.0031067 | 0.014507  | 76.656   | 1.907  | 75.232   | 78.822   | 85.135   | 1.727  | 83.158   | 86.346   |
| 13048 | ENSG00000231500 | RPS18    | -1.1 | 0.0070781 | 0.0277562 | 1373.022 | 12.428 | 1358.899 | 1382.290 | 1511.356 | 36.911 | 1480.843 | 1552.383 |
| 13049 | ENSG00000220848 | RPS18P9  | -1.3 | 0.0263009 | 0.077903  | 21.264   | 3.271  | 18.785   | 24.971   | 27.287   | 1.135  | 26.303   | 28.528   |
| 13051 | ENSG00000140988 | RPS2     | -1   | 0.0610476 | 0.1476262 | 1079.411 | 17.965 | 1066.546 | 1099.936 | 1158.033 | 65.642 | 1091.050 | 1222.247 |
| 13053 | ENSG00000233971 | RPS20P10 | -1.5 | 0.013442  | 0.0462552 | 14.800   | 1.299  | 13.323   | 15.767   | 22.719   | 5.398  | 17.150   | 27.929   |
| 13056 | ENSG00000223803 | RPS20P14 | -1.1 | 0.1119318 | 0.2312327 | 130.192  | 11.805 | 116.620  | 138.077  | 146.054  | 5.373  | 139.912  | 149.888  |
| 13057 | ENSG00000239218 | RPS20P22 | -1.3 | 0.0298514 | 0.0859219 | 7.604    | 0.405  | 7.348    | 8.071    | 9.728    | 1.499  | 8.484    | 11.392   |
| 13059 | ENSG00000171858 | RPS21    | -1.1 | 0.0073143 | 0.0284645 | 593.357  | 19.015 | 579.920  | 615.114  | 655.934  | 14.628 | 640.630  | 669.776  |
| 13060 | ENSG00000186468 | RPS23    | 1    | 0.094986  | 0.2059876 | 502.674  | 4.758  | 497.192  | 505.737  | 493.401  | 10.704 | 486.119  | 505.690  |
| 13061 | ENSG00000197728 | RPS26    | -1.1 | 0.0071933 | 0.0281165 | 29.202   | 1.809  | 27.628   | 31.178   | 34.221   | 0.414  | 33.752   | 34.536   |
| 13062 | ENSG00000223416 | RPS26P15 | -1.2 | 0.058917  | 0.1436239 | 49.654   | 1.834  | 47.945   | 51.591   | 59.134   | 2.116  | 56.912   | 61.126   |
| 13063 | ENSG00000212829 | RPS26P3  | -1.2 | 0.1099637 | 0.2283944 | 39.469   | 2.109  | 37.139   | 41.247   | 46.598   | 3.480  | 42.988   | 49.931   |
| 13064 | ENSG00000234354 | RPS26P47 | -1.2 | 0.0210457 | 0.0656849 | 95.545   | 2.733  | 92.936   | 98.387   | 113.405  | 4.821  | 110.031  | 118.926  |
| 13065 | ENSG00000177954 | RPS27    | -1.1 | 0.0577504 | 0.1416171 | 155.284  | 10.736 | 147.459  | 167.524  | 170.801  | 5.968  | 165.337  | 177.170  |
| 13067 | ENSG00000143947 | RPS27A   | -1.1 | 0.0218013 | 0.0674947 | 272.832  | 12.388 | 262.969  | 286.736  | 296.215  | 8.089  | 287.467  | 303.425  |
| 13069 | ENSG00000185088 | RPS27L   | 1.1  | 0.0447659 | 0.1166425 | 43.924   | 1.947  | 42.294   | 46.079   | 42.014   | 2.142  | 40.355   | 44.432   |
| 13070 | ENSG00000233927 | RPS28    | -1.1 | 0.0839547 | 0.188364  | 43.267   | 1.156  | 41.969   | 44.185   | 47.920   | 2.849  | 44.721   | 50.185   |
| 13072 | ENSG00000227097 | RPS28P7  | -1.1 | 0.0677448 | 0.1598226 | 2663.827 | 35.326 | 2625.475 | 2695.034 | 2868.231 | 93.509 | 2796.270 | 2973.927 |
| 13074 | ENSG00000213741 | RPS29    | -1.2 | 0.0218092 | 0.0674947 | 55.889   | 1.747  | 53.875   | 56.985   | 65.762   | 6.364  | 60.936   | 72.974   |
| 13075 | ENSG00000196183 | RPS2P4   | -1.2 | 0.0382105 | 0.1031975 | 19.004   | 1.561  | 17.619   | 20.696   | 23.473   | 4.060  | 19.862   | 27.869   |
| 13076 | ENSG00000216866 | RPS2P55  | -1.1 | 0.1203853 | 0.2435289 | 421.142  | 16.910 | 404.343  | 438.160  | 452.325  | 1.886  | 450.432  | 454.204  |
| 13078 | ENSG00000145425 | RPS3A    | -1.1 | 0.0566095 | 0.1394892 | 416.836  | 19.859 | 402.680  | 439.537  | 449.721  | 12.604 | 440.075  | 463.983  |
| 13079 | ENSG00000234335 | RPS4XP11 | 1.2  | 0.0920539 | 0.2014372 | 20.800   | 4.889  | 15.277   | 24.576   | 17.850   | 2.071  | 15.601   | 19.680   |
| 13081 | ENSG00000137154 | RPS6     | 1.1  | 0.0022075 | 0.0109585 | 1347.735 | 17.675 | 1336.201 | 1368.084 | 1273.889 | 56.576 | 1230.222 | 1337.803 |
| 13082 | ENSG00000071242 | RPS6KA2  | 1.2  | 0.0017757 | 0.0092589 | 9.098    | 0.183  | 8.892    | 9.242    | 7.741    | 0.561  | 7.367    | 8.386    |
| 13085 | ENSG00000177189 | RPS6KA3  | 1.1  | 0.0258608 | 0.0769365 | 21.247   | 0.796  | 20.530   | 22.104   | 19.913   | 0.963  | 19.008   | 20.925   |
| 13086 | ENSG00000100784 | RPS6KA5  | -1.2 | 0.0244932 | 0.0737632 | 0.865    | 0.064  | 0.817    | 0.938    | 1.056    | 0.141  | 0.952    | 1.216    |
| 13090 | ENSG00000072133 | RPS6KA6  | 1.1  | 0.0495272 | 0.1261146 | 10.540   | 0.353  | 10.183   | 10.888   | 9.862    | 0.334  | 9.498    | 10.154   |
| 13091 | ENSG00000136643 | RPS6KC1  | -1.1 | 0.061263  | 0.147999  | 15.313   | 1.383  | 14.297   | 16.887   | 16.957   | 0.493  | 16.508   | 17.484   |
| 13095 | ENSG00000198208 | RPS6KL1  | 1.5  | 5.91E-06  | 8.551E-05 | 5.174    | 0.556  | 4.555    | 5.633    | 3.654    | 0.573  | 3.142    | 4.272    |

|       | A               | B       | C    | D         | E         | F        | G      | H        | I        | J        | K      | L        | M        |
|-------|-----------------|---------|------|-----------|-----------|----------|--------|----------|----------|----------|--------|----------|----------|
| 13096 | ENSG00000170889 | RPS9    | -1.1 | 0.0003102 | 0.0022701 | 331.642  | 7.063  | 325.939  | 339.542  | 375.406  | 14.508 | 360.920  | 389.936  |
| 13101 | ENSG00000225178 | RPSAP58 | -1.1 | 0.0083736 | 0.0316616 | 1846.607 | 44.677 | 1798.442 | 1886.695 | 2036.698 | 85.122 | 1947.640 | 2117.244 |
| 13106 | ENSG00000141564 | RPTOR   | -1.1 | 0.1066458 | 0.2233685 | 7.572    | 0.253  | 7.359    | 7.852    | 8.335    | 0.530  | 7.724    | 8.679    |
| 13107 | ENSG00000007376 | RPUSD1  | -1.2 | 0.011636  | 0.0412233 | 14.065   | 1.079  | 12.859   | 14.939   | 16.652   | 0.760  | 15.791   | 17.227   |
| 13108 | ENSG00000165526 | RPUSD4  | -1.3 | 3.03E-08  | 9.723E-07 | 25.258   | 1.322  | 24.046   | 26.668   | 33.897   | 1.426  | 32.368   | 35.192   |
| 13109 | ENSG00000155876 | RRAGA   | -1.1 | 0.0607573 | 0.1470926 | 49.552   | 2.688  | 47.068   | 52.405   | 54.946   | 3.522  | 51.253   | 58.268   |
| 13110 | ENSG00000083750 | RRAGB   | 1.5  | 2.095E-06 | 3.533E-05 | 9.801    | 0.391  | 9.513    | 10.247   | 6.651    | 0.151  | 6.497    | 6.798    |
| 13112 | ENSG00000025039 | RRAGD   | 1.5  | 4.62E-11  | 3.284E-09 | 22.325   | 1.526  | 20.581   | 23.411   | 15.215   | 0.456  | 14.850   | 15.726   |
| 13115 | ENSG00000133818 | RRAS2   | 1.1  | 0.0088908 | 0.0331356 | 151.433  | 3.348  | 149.023  | 155.256  | 143.756  | 6.663  | 136.163  | 148.626  |
| 13117 | ENSG00000125844 | RRBP1   | -1.1 | 0.0071432 | 0.0279661 | 58.270   | 1.631  | 57.212   | 60.149   | 64.672   | 1.942  | 62.523   | 66.302   |
| 13118 | ENSG00000257122 | RRN3P3  | 1.3  | 0.0908493 | 0.1998004 | 1.372    | 0.202  | 1.140    | 1.514    | 1.055    | 0.098  | 0.942    | 1.115    |
| 13121 | ENSG00000189306 | RRP7A   | -1.1 | 0.0104817 | 0.0378877 | 24.014   | 0.475  | 23.658   | 24.554   | 27.367   | 1.423  | 26.080   | 28.895   |
| 13122 | ENSG00000136444 | RSAD1   | -1.2 | 0.0007444 | 0.004588  | 23.700   | 0.428  | 23.248   | 24.097   | 27.925   | 1.484  | 26.561   | 29.506   |
| 13123 | ENSG00000081019 | RSBN1   | -1.1 | 0.0031857 | 0.0147931 | 12.858   | 0.622  | 12.388   | 13.563   | 15.088   | 1.199  | 13.961   | 16.349   |
| 13128 | ENSG00000048649 | RSF1    | -1.1 | 0.0767152 | 0.1755183 | 18.395   | 0.187  | 18.263   | 18.609   | 19.900   | 0.296  | 19.703   | 20.240   |
| 13130 | ENSG00000171490 | RSL1D1  | -1   | 0.0976426 | 0.2096255 | 80.549   | 1.965  | 78.718   | 82.626   | 86.361   | 4.986  | 83.354   | 92.117   |
| 13131 | ENSG00000137876 | RSL24D1 | 1.1  | 0.0028403 | 0.0134623 | 152.332  | 4.030  | 149.888  | 156.984  | 142.653  | 3.357  | 138.983  | 145.566  |
| 13134 | ENSG00000130363 | RSPH3   | 1.3  | 0.0011316 | 0.0064918 | 4.063    | 0.063  | 3.997    | 4.121    | 3.148    | 0.071  | 3.078    | 3.219    |
| 13138 | ENSG00000148484 | RSU1    | 1.2  | 9.083E-07 | 1.768E-05 | 40.467   | 1.506  | 39.024   | 42.028   | 33.725   | 1.094  | 32.616   | 34.803   |
| 13140 | ENSG00000100220 | RTCB    | -1.1 | 0.0221509 | 0.0681905 | 120.323  | 1.400  | 118.897  | 121.695  | 131.689  | 6.478  | 126.589  | 138.978  |
| 13142 | ENSG00000182010 | RTKN2   | -1.2 | 2.55E-05  | 0.000292  | 14.115   | 1.195  | 13.400   | 15.494   | 17.744   | 0.889  | 16.769   | 18.510   |
| 13143 | ENSG00000242732 | RTL5    | 2.3  | 1.193E-06 | 2.199E-05 | 2.323    | 0.565  | 1.902    | 2.966    | 1.014    | 0.233  | 0.747    | 1.178    |
| 13144 | ENSG00000243978 | RTL9    | 1.7  | 0.0734438 | 0.1699021 | 0.295    | 0.055  | 0.240    | 0.350    | 0.174    | 0.053  | 0.113    | 0.211    |
| 13146 | ENSG00000115310 | RTN4    | 1.1  | 4.363E-05 | 0.0004578 | 132.468  | 3.057  | 128.938  | 134.264  | 120.441  | 4.885  | 115.446  | 125.209  |
| 13147 | ENSG00000040608 | RTN4R   | 1.3  | 0.0003553 | 0.0025334 | 16.873   | 1.449  | 15.255   | 18.053   | 13.555   | 1.827  | 11.814   | 15.457   |
| 13155 | ENSG00000102445 | RUBCNL  | 1.2  | 0.0204769 | 0.0642535 | 3.599    | 0.159  | 3.434    | 3.751    | 3.007    | 0.584  | 2.442    | 3.608    |
| 13156 | ENSG00000176783 | RUFY1   | 1.3  | 2.588E-06 | 4.259E-05 | 16.562   | 0.713  | 15.929   | 17.335   | 13.279   | 0.195  | 13.157   | 13.504   |
| 13157 | ENSG00000018189 | RUFY3   | 1.1  | 0.0089486 | 0.0332778 | 17.905   | 0.132  | 17.776   | 18.039   | 16.553   | 0.400  | 16.124   | 16.916   |
| 13158 | ENSG00000105784 | RUNDC3B | 1.5  | 0.1175407 | 0.2393747 | 0.483    | 0.129  | 0.345    | 0.601    | 0.323    | 0.165  | 0.142    | 0.465    |
| 13160 | ENSG00000079102 | RUNX1T1 | 1.2  | 0.0005446 | 0.0035852 | 3.673    | 0.413  | 3.401    | 4.148    | 3.001    | 0.212  | 2.762    | 3.167    |
| 13164 | ENSG00000160753 | RUSC1   | -1.1 | 0.0069583 | 0.0273942 | 16.377   | 0.768  | 15.490   | 16.828   | 18.938   | 1.044  | 18.328   | 20.144   |
| 13165 | ENSG00000122481 | RWDD3   | 1.2  | 0.1140191 | 0.2340298 | 6.949    | 0.363  | 6.540    | 7.230    | 5.990    | 1.543  | 4.210    | 6.944    |
| 13167 | ENSG00000186350 | RXRA    | -1.1 | 0.0098572 | 0.0360231 | 8.534    | 0.313  | 8.219    | 8.845    | 9.834    | 0.943  | 8.920    | 10.804   |
| 13168 | ENSG00000204231 | RXRB    | -1.3 | 0.000103  | 0.0009254 | 13.466   | 0.371  | 13.145   | 13.872   | 17.445   | 0.752  | 16.987   | 18.313   |
| 13169 | ENSG00000163785 | RYK     | 1.2  | 6.581E-07 | 1.349E-05 | 35.266   | 2.171  | 33.687   | 37.741   | 29.856   | 0.666  | 29.115   | 30.403   |
| 13170 | ENSG00000196218 | RYR1    | -1.3 | 1.141E-06 | 2.124E-05 | 4.141    | 0.221  | 4.013    | 4.396    | 5.550    | 0.383  | 5.194    | 5.956    |
| 13176 | ENSG00000197747 | S100A10 | 1.2  | 1.781E-05 | 0.000215  | 79.724   | 7.061  | 74.444   | 87.745   | 67.105   | 1.861  | 65.760   | 69.229   |
| 13179 | ENSG00000189171 | S100A13 | -1.2 | 0.00344   | 0.0157294 | 19.122   | 1.887  | 17.467   | 21.178   | 23.628   | 2.044  | 22.302   | 25.982   |
| 13180 | ENSG00000196154 | S100A4  | -1.1 | 0.049725  | 0.1264659 | 34.772   | 3.694  | 32.575   | 39.036   | 40.419   | 2.790  | 37.773   | 43.334   |
| 13181 | ENSG00000166788 | SAAL1   | 1.1  | 0.0171898 | 0.0560284 | 44.621   | 2.264  | 43.071   | 47.219   | 41.273   | 2.864  | 39.482   | 44.576   |
| 13183 | ENSG00000211456 | SACM1L  | -1.3 | 3.93E-09  | 1.653E-07 | 38.165   | 0.408  | 37.719   | 38.518   | 49.783   | 1.680  | 47.992   | 51.324   |
| 13184 | ENSG00000142230 | SAE1    | 1.1  | 3.938E-06 | 6.038E-05 | 249.134  | 5.798  | 242.727  | 254.020  | 223.023  | 5.069  | 217.602  | 227.645  |
| 13185 | ENSG00000160633 | SAFB    | -1.5 | 6.60E-16  | 1.53E-13  | 42.410   | 1.612  | 40.778   | 44.001   | 63.950   | 2.257  | 61.349   | 65.393   |



|       | A               | B        | C    | D         | E         | F       | G      | H       | I       | J       | K     | L       | M       |
|-------|-----------------|----------|------|-----------|-----------|---------|--------|---------|---------|---------|-------|---------|---------|
| 13186 | ENSG00000130254 | SAFB2    | -1.3 | 4.477E-08 | 1.36E-06  | 21.029  | 1.429  | 19.874  | 22.628  | 28.144  | 2.013 | 26.058  | 30.076  |
| 13187 | ENSG00000165821 | SALL2    | -1.2 | 0.0012617 | 0.0070824 | 242.403 | 24.975 | 214.033 | 261.070 | 286.280 | 5.733 | 280.346 | 291.788 |
| 13190 | ENSG00000256463 | SALL3    | -1.2 | 0.0006735 | 0.0042489 | 9.355   | 1.192  | 8.044   | 10.373  | 11.529  | 0.443 | 11.033  | 11.883  |
| 13194 | ENSG00000101115 | SALL4    | -1.1 | 9.229E-05 | 0.0008473 | 79.060  | 6.439  | 72.236  | 85.030  | 92.824  | 3.898 | 88.359  | 95.541  |
| 13195 | ENSG00000177570 | SAMD12   | 1.1  | 0.0400335 | 0.1070662 | 4.837   | 0.255  | 4.543   | 4.997   | 4.389   | 0.225 | 4.129   | 4.537   |
| 13196 | ENSG00000167100 | SAMD14   | -1.2 | 0.0637753 | 0.1526293 | 2.900   | 0.146  | 2.736   | 3.015   | 3.470   | 0.204 | 3.235   | 3.608   |
| 13201 | ENSG00000164483 | SAMD3    | -1.4 | 0.0848986 | 0.1897246 | 0.329   | 0.066  | 0.257   | 0.385   | 0.474   | 0.174 | 0.363   | 0.675   |
| 13203 | ENSG0000020577  | SAMD4A   | 1.9  | 1.28E-14  | 2.34E-12  | 6.255   | 0.301  | 5.986   | 6.580   | 3.354   | 0.041 | 3.318   | 3.399   |
| 13205 | ENSG00000179134 | SAMD4B   | -1.2 | 2.858E-07 | 6.722E-06 | 29.697  | 0.272  | 29.430  | 29.975  | 37.238  | 1.881 | 35.466  | 39.211  |
| 13210 | ENSG00000156671 | SAMD8    | -1.1 | 0.0268587 | 0.079138  | 21.729  | 0.659  | 20.975  | 22.199  | 24.203  | 1.792 | 22.841  | 26.233  |
| 13211 | ENSG00000101347 | SAMHD1   | -1.3 | 1.086E-07 | 2.923E-06 | 28.755  | 2.309  | 26.317  | 30.909  | 37.806  | 1.170 | 36.736  | 39.056  |
| 13213 | ENSG00000161526 | SAP30BP  | 1.1  | 0.0826255 | 0.1860779 | 16.387  | 0.558  | 15.742  | 16.722  | 15.703  | 0.584 | 15.118  | 16.287  |
| 13214 | ENSG00000186193 | SAPCD2   | -1.1 | 0.0090522 | 0.033582  | 26.988  | 1.270  | 25.938  | 28.399  | 31.124  | 3.077 | 28.029  | 34.182  |
| 13216 | ENSG00000152700 | SAR1B    | 1.2  | 5.718E-05 | 0.0005719 | 8.178   | 0.377  | 7.746   | 8.444   | 6.726   | 0.786 | 6.177   | 7.627   |
| 13217 | ENSG00000123453 | SARDH    | -1.2 | 0.0146637 | 0.0495577 | 5.929   | 0.411  | 5.500   | 6.319   | 7.106   | 0.560 | 6.584   | 7.698   |
| 13219 | ENSG00000004139 | SARM1    | 1.2  | 0.1046081 | 0.22032   | 1.241   | 0.007  | 1.234   | 1.246   | 1.090   | 0.140 | 0.948   | 1.227   |
| 13220 | ENSG00000031698 | SARS     | 1.3  | 3.41E-12  | 3.24E-10  | 121.639 | 2.015  | 120.163 | 123.934 | 93.941  | 1.198 | 92.580  | 94.834  |
| 13223 | ENSG00000175467 | SART1    | -1.1 | 0.1117309 | 0.230987  | 35.601  | 1.825  | 33.526  | 36.954  | 38.574  | 1.125 | 37.828  | 39.869  |
| 13224 | ENSG00000075856 | SART3    | -1.1 | 0.0012314 | 0.0069402 | 44.886  | 0.459  | 44.450  | 45.366  | 50.593  | 1.153 | 49.702  | 51.895  |
| 13228 | ENSG00000111961 | SASH1    | -1.3 | 4.788E-07 | 1.044E-05 | 11.405  | 0.177  | 11.258  | 11.601  | 14.633  | 0.919 | 13.714  | 15.551  |
| 13230 | ENSG00000130066 | SAT1     | -1.1 | 0.0009747 | 0.00574   | 84.336  | 3.398  | 81.204  | 87.948  | 96.703  | 3.680 | 93.938  | 100.880 |
| 13231 | ENSG00000141504 | SAT2     | 1.2  | 5.08E-05  | 0.0005189 | 73.920  | 3.474  | 71.577  | 77.911  | 61.597  | 5.089 | 55.968  | 65.872  |
| 13233 | ENSG00000182568 | SATB1    | -1.1 | 0.0845336 | 0.189216  | 12.866  | 0.365  | 12.464  | 13.177  | 13.951  | 0.465 | 13.458  | 14.381  |
| 13234 | ENSG00000126524 | SBDS     | 1.1  | 0.1101868 | 0.2287323 | 56.555  | 0.886  | 55.740  | 57.498  | 53.887  | 4.058 | 50.071  | 58.150  |
| 13237 | ENSG00000225648 | SBDSP1   | 1.2  | 0.0103383 | 0.0374734 | 19.308  | 0.681  | 18.530  | 19.794  | 16.085  | 2.228 | 13.633  | 17.987  |
| 13240 | ENSG00000100241 | SBF1     | -1.1 | 0.0015924 | 0.0084962 | 29.393  | 0.963  | 28.326  | 30.198  | 33.593  | 1.865 | 32.313  | 35.733  |
| 13241 | ENSG00000246273 | SBF2-AS1 | 1.3  | 0.0109563 | 0.0392344 | 3.391   | 0.519  | 2.970   | 3.971   | 2.627   | 0.364 | 2.304   | 3.021   |
| 13243 | ENSG00000188322 | SBK1     | -1.1 | 0.0783069 | 0.1784912 | 40.832  | 1.523  | 39.100  | 41.962  | 45.082  | 5.209 | 40.719  | 50.848  |
| 13246 | ENSG00000187550 | SBK2     | -1.6 | 0.0037565 | 0.0168612 | 3.527   | 0.407  | 3.110   | 3.923   | 5.852   | 0.768 | 4.978   | 6.419   |
| 13247 | ENSG00000139697 | SBNO1    | -1.2 | 1.778E-06 | 3.063E-05 | 17.513  | 0.362  | 17.291  | 17.931  | 21.411  | 1.092 | 20.215  | 22.355  |
| 13248 | ENSG00000064932 | SBNO2    | -1.1 | 0.035448  | 0.097784  | 13.843  | 0.684  | 13.109  | 14.461  | 15.710  | 0.932 | 14.719  | 16.570  |
| 13249 | ENSG00000164764 | SBSPON   | 1.4  | 0.1091926 | 0.2272395 | 0.811   | 0.185  | 0.646   | 1.011   | 0.581   | 0.194 | 0.393   | 0.780   |
| 13251 | ENSG00000109929 | SC5D     | 1.4  | 2.208E-06 | 3.679E-05 | 71.611  | 6.811  | 65.392  | 78.889  | 50.601  | 5.130 | 46.651  | 56.399  |
| 13252 | ENSG00000156304 | SCAF4    | -1.1 | 0.0009488 | 0.0056051 | 31.971  | 0.541  | 31.350  | 32.342  | 36.806  | 1.284 | 35.687  | 38.208  |
| 13254 | ENSG00000213079 | SCAF8    | -1.1 | 0.0191784 | 0.0609706 | 37.173  | 1.868  | 35.207  | 38.925  | 41.078  | 0.184 | 40.943  | 41.288  |
| 13255 | ENSG00000173611 | SCAI     | -1.1 | 0.072984  | 0.1692088 | 8.920   | 0.052  | 8.872   | 8.975   | 9.826   | 0.674 | 9.248   | 10.567  |
| 13256 | ENSG00000140497 | SCAMP2   | 1.1  | 0.0856621 | 0.1909838 | 18.891  | 0.418  | 18.426  | 19.236  | 18.003  | 0.274 | 17.757  | 18.299  |
| 13257 | ENSG00000227500 | SCAMP4   | 1.2  | 0.008945  | 0.0332777 | 13.438  | 0.907  | 12.911  | 14.485  | 11.897  | 0.553 | 11.281  | 12.349  |
| 13258 | ENSG00000198794 | SCAMP5   | 1.2  | 0.000149  | 0.0012528 | 30.595  | 1.163  | 29.259  | 31.379  | 26.773  | 1.300 | 25.377  | 27.949  |
| 13260 | ENSG00000171222 | SCAND1   | -1.2 | 0.0081614 | 0.0310889 | 22.307  | 1.984  | 20.601  | 24.484  | 27.295  | 3.331 | 24.431  | 30.951  |
| 13261 | ENSG00000114650 | SCAP     | -1.1 | 0.0001852 | 0.001502  | 36.354  | 1.660  | 34.970  | 38.195  | 42.714  | 2.669 | 41.160  | 45.795  |
| 13262 | ENSG00000168077 | SCARA3   | 1.2  | 0.0048993 | 0.0208159 | 9.239   | 0.964  | 8.607   | 10.349  | 7.818   | 0.403 | 7.369   | 8.148   |
| 13263 | ENSG00000168079 | SCARA5   | 2    | 0.0306501 | 0.0877131 | 0.334   | 0.116  | 0.200   | 0.403   | 0.167   | 0.015 | 0.151   | 0.176   |

|       | A               | B        | C    | D         | E         | F        | G      | H        | I        | J       | K      | L       | M       |
|-------|-----------------|----------|------|-----------|-----------|----------|--------|----------|----------|---------|--------|---------|---------|
| 13264 | ENSG00000073060 | SCARB1   | 1.2  | 0.0001524 | 0.0012739 | 19.529   | 0.299  | 19.353   | 19.874   | 17.286  | 0.765  | 16.622  | 18.123  |
| 13265 | ENSG00000138760 | SCARB2   | 1.1  | 0.0142459 | 0.0484888 | 21.448   | 0.446  | 21.153   | 21.961   | 20.357  | 1.056  | 19.287  | 21.399  |
| 13266 | ENSG00000074660 | SCARF1   | 1.3  | 0.1230005 | 0.2475083 | 1.005    | 0.046  | 0.953    | 1.042    | 0.814   | 0.079  | 0.725   | 0.877   |
| 13268 | ENSG00000244486 | SCARF2   | -1.2 | 0.0569398 | 0.1400325 | 2.718    | 0.391  | 2.363    | 3.138    | 3.429   | 0.517  | 3.114   | 4.026   |
| 13269 | ENSG00000252481 | SCARNA13 | -1.9 | 0.0028171 | 0.0134027 | 6.738    | 1.719  | 5.372    | 8.668    | 13.289  | 1.524  | 11.530  | 14.218  |
| 13273 | ENSG00000143653 | SCCPDH   | 1.2  | 0.0001359 | 0.0011589 | 37.967   | 2.808  | 36.130   | 41.199   | 32.006  | 2.235  | 30.404  | 34.559  |
| 13274 | ENSG00000099194 | SCD      | 1.8  | 2.63E-25  | 1.11E-21  | 1034.501 | 25.446 | 1013.118 | 1062.645 | 591.373 | 13.521 | 581.194 | 606.715 |
| 13275 | ENSG00000145284 | SCD5     | -1.6 | 0.002397  | 0.0117405 | 0.921    | 0.125  | 0.791    | 1.041    | 1.524   | 0.154  | 1.348   | 1.633   |
| 13276 | ENSG00000226549 | SCDP1    | 2    | 3.024E-08 | 9.723E-07 | 13.948   | 1.074  | 12.747   | 14.816   | 7.292   | 0.285  | 6.968   | 7.499   |
| 13278 | ENSG00000171951 | SCG2     | 3.1  | 2.87E-10  | 1.668E-08 | 3.867    | 0.270  | 3.562    | 4.073    | 1.256   | 0.300  | 0.914   | 1.473   |
| 13280 | ENSG00000104112 | SCG3     | 1.1  | 0.0023229 | 0.0114476 | 55.289   | 0.848  | 54.372   | 56.044   | 50.592  | 2.319  | 47.927  | 52.141  |
| 13283 | ENSG00000166922 | SCG5     | 1.2  | 0.0010103 | 0.0059228 | 32.563   | 2.560  | 29.852   | 34.940   | 27.767  | 2.077  | 25.459  | 29.485  |
| 13284 | ENSG00000164265 | SCGB3A2  | -1.1 | 0.038203  | 0.1031975 | 54.538   | 1.446  | 53.412   | 56.168   | 61.945  | 3.782  | 59.625  | 66.309  |
| 13289 | ENSG00000006747 | SCIN     | 1.8  | 0.0253281 | 0.0757137 | 0.349    | 0.135  | 0.241    | 0.500    | 0.204   | 0.139  | 0.067   | 0.345   |
| 13290 | ENSG00000047634 | SCML1    | 1.6  | 3.996E-06 | 6.104E-05 | 3.423    | 0.309  | 3.171    | 3.767    | 2.165   | 0.122  | 2.034   | 2.276   |
| 13291 | ENSG00000007314 | SCN4A    | 1.3  | 0.0067795 | 0.0267839 | 4.212    | 0.967  | 3.117    | 4.947    | 3.351   | 0.372  | 2.996   | 3.738   |
| 13294 | ENSG00000177098 | SCN4B    | -1.3 | 0.0182061 | 0.0586401 | 2.054    | 0.309  | 1.830    | 2.406    | 2.659   | 0.105  | 2.541   | 2.741   |
| 13295 | ENSG00000163156 | SCNM1    | 1.1  | 0.080572  | 0.1822961 | 10.585   | 0.329  | 10.310   | 10.950   | 9.682   | 0.858  | 8.814   | 10.529  |
| 13297 | ENSG00000111319 | SCNN1A   | -1.1 | 0.0748899 | 0.1723137 | 52.219   | 2.337  | 49.575   | 54.006   | 56.279  | 1.228  | 55.070  | 57.525  |
| 13298 | ENSG00000162572 | SCNN1D   | -1.4 | 0.0028259 | 0.0134277 | 2.294    | 0.404  | 1.909    | 2.714    | 3.329   | 0.226  | 3.070   | 3.483   |
| 13299 | ENSG00000133028 | SCO1     | -1.1 | 0.0017424 | 0.0091463 | 25.576   | 1.349  | 24.219   | 26.917   | 28.966  | 0.195  | 28.810  | 29.185  |
| 13304 | ENSG00000116171 | SCP2     | 1.1  | 0.0833814 | 0.1874084 | 20.700   | 0.918  | 19.782   | 21.617   | 19.811  | 1.019  | 18.887  | 20.903  |
| 13305 | ENSG00000121064 | SCPEP1   | 1.1  | 0.0100193 | 0.0365127 | 29.522   | 0.625  | 28.962   | 30.196   | 27.180  | 0.275  | 26.912  | 27.461  |
| 13307 | ENSG00000180900 | SCRIB    | -1.1 | 0.0505867 | 0.1281757 | 44.613   | 1.217  | 43.353   | 45.781   | 48.907  | 4.272  | 45.672  | 53.750  |
| 13309 | ENSG00000136193 | SCRN1    | 1.2  | 2.198E-09 | 9.941E-08 | 100.993  | 0.154  | 100.823  | 101.124  | 84.638  | 2.237  | 82.284  | 86.736  |
| 13310 | ENSG00000159307 | SCUBE1   | -1.6 | 6.835E-05 | 0.0006621 | 0.968    | 0.237  | 0.730    | 1.205    | 1.540   | 0.194  | 1.320   | 1.688   |
| 13311 | ENSG00000146197 | SCUBE3   | -1.6 | 0.0066763 | 0.026505  | 0.732    | 0.205  | 0.522    | 0.932    | 1.159   | 0.172  | 1.021   | 1.351   |
| 13312 | ENSG00000142186 | SCYL1    | -1.1 | 0.036665  | 0.1002936 | 32.302   | 1.892  | 30.170   | 33.784   | 35.743  | 0.579  | 35.319  | 36.402  |
| 13315 | ENSG00000136021 | SCYL2    | 1.1  | 0.0002761 | 0.0020714 | 31.566   | 0.521  | 31.088   | 32.120   | 28.415  | 0.820  | 27.785  | 29.342  |
| 13316 | ENSG00000000457 | SCYL3    | -1.2 | 0.0321318 | 0.0910905 | 4.004    | 0.452  | 3.499    | 4.372    | 4.747   | 0.078  | 4.658   | 4.806   |
| 13319 | ENSG00000198301 | SDAD1    | 1.1  | 0.0002527 | 0.001927  | 71.098   | 1.829  | 69.009   | 72.406   | 64.284  | 1.486  | 63.174  | 65.972  |
| 13320 | ENSG00000115884 | SDC1     | -1.1 | 0.0359887 | 0.0988963 | 28.422   | 1.884  | 26.942   | 30.543   | 31.787  | 2.089  | 30.453  | 34.195  |
| 13324 | ENSG00000169439 | SDC2     | 1.1  | 0.0071958 | 0.02812   | 83.669   | 5.326  | 79.321   | 89.609   | 77.596  | 6.231  | 71.042  | 83.443  |
| 13325 | ENSG00000124145 | SDC4     | 1.1  | 0.040376  | 0.1077606 | 104.827  | 4.468  | 101.538  | 109.914  | 100.086 | 5.466  | 93.886  | 104.206 |
| 13328 | ENSG00000137575 | SDCBP    | 1.3  | 1.54E-10  | 9.648E-09 | 108.579  | 3.348  | 105.518  | 112.155  | 83.013  | 1.546  | 81.241  | 84.084  |
| 13330 | ENSG00000165689 | SDCCAG3  | -1.1 | 0.0133126 | 0.0459127 | 52.450   | 3.853  | 49.419   | 56.786   | 59.142  | 3.172  | 55.889  | 62.225  |
| 13332 | ENSG00000132581 | SDF2     | -1.2 | 0.0021184 | 0.0106062 | 17.263   | 0.238  | 17.026   | 17.503   | 20.687  | 0.766  | 19.809  | 21.216  |
| 13333 | ENSG00000128228 | SDF2L1   | -1.2 | 0.0473567 | 0.121835  | 20.521   | 3.657  | 17.217   | 24.451   | 24.952  | 4.910  | 20.066  | 29.885  |
| 13334 | ENSG00000073578 | SDHA     | -1.1 | 0.0009373 | 0.0055468 | 30.537   | 1.123  | 29.339   | 31.565   | 34.901  | 1.149  | 34.052  | 36.209  |
| 13338 | ENSG00000205138 | SDHAF1   | -1.3 | 0.0056371 | 0.0232527 | 12.283   | 2.237  | 10.537   | 14.804   | 16.827  | 3.701  | 13.069  | 20.469  |
| 13340 | ENSG00000167985 | SDHAF2   | -1.6 | 5.304E-05 | 0.0005365 | 4.120    | 0.911  | 3.439    | 5.155    | 6.670   | 0.540  | 6.151   | 7.229   |
| 13342 | ENSG00000185485 | SDHAP1   | -1.1 | 0.0426003 | 0.1121687 | 11.772   | 0.872  | 11.016   | 12.727   | 13.554  | 0.728  | 12.841  | 14.297  |

|       | A               | B         | C    | D         | E         | F       | G     | H       | I       | J       | K     | L      | M       |
|-------|-----------------|-----------|------|-----------|-----------|---------|-------|---------|---------|---------|-------|--------|---------|
| 13343 | ENSG00000227073 | SDHDP2    | -1.4 | 0.0424218 | 0.1118529 | 9.252   | 1.525 | 8.010   | 10.954  | 12.909  | 1.008 | 12.247 | 14.069  |
| 13346 | ENSG00000146555 | SDK1      | -1.2 | 0.0123938 | 0.0432914 | 3.001   | 0.211 | 2.779   | 3.199   | 3.581   | 0.136 | 3.438  | 3.708   |
| 13348 | ENSG00000100445 | SDR39U1   | -1.1 | 0.0249604 | 0.0748768 | 22.708  | 1.391 | 21.630  | 24.278  | 26.018  | 1.294 | 25.257 | 27.512  |
| 13349 | ENSG00000184860 | SDR42E1   | -1.2 | 0.0361289 | 0.0991801 | 1.904   | 0.188 | 1.703   | 2.076   | 2.275   | 0.087 | 2.190  | 2.364   |
| 13353 | ENSG00000139410 | SDSL      | 1.7  | 0.0166329 | 0.0547089 | 1.515   | 0.202 | 1.333   | 1.732   | 0.930   | 0.348 | 0.706  | 1.332   |
| 13357 | ENSG00000157020 | SEC13     | -1.1 | 0.0003909 | 0.0027455 | 41.772  | 1.538 | 40.205  | 43.278  | 48.109  | 2.070 | 46.710 | 50.486  |
| 13359 | ENSG00000121542 | SEC22A    | 1.2  | 0.0762313 | 0.1746072 | 4.774   | 0.649 | 4.059   | 5.327   | 4.170   | 0.143 | 4.050  | 4.328   |
| 13361 | ENSG00000093183 | SEC22C    | -1.1 | 0.0138597 | 0.0473842 | 14.226  | 0.432 | 13.786  | 14.649  | 16.029  | 0.470 | 15.589 | 16.524  |
| 13366 | ENSG00000107651 | SEC23IP   | -1.1 | 0.0001666 | 0.0013754 | 32.281  | 1.155 | 31.267  | 33.538  | 37.675  | 0.752 | 36.915 | 38.418  |
| 13367 | ENSG00000138802 | SEC24B    | -1.1 | 0.0455086 | 0.1182133 | 28.979  | 0.920 | 28.025  | 29.860  | 32.070  | 2.714 | 29.161 | 34.535  |
| 13372 | ENSG00000176986 | SEC24C    | -1.1 | 0.0791011 | 0.1799684 | 52.359  | 1.715 | 50.837  | 54.216  | 56.538  | 2.331 | 54.056 | 58.683  |
| 13373 | ENSG00000138674 | SEC31A    | -1.1 | 0.004543  | 0.0196414 | 37.922  | 0.453 | 37.609  | 38.441  | 42.203  | 1.482 | 40.502 | 43.214  |
| 13375 | ENSG00000058262 | SEC61A1   | 1    | 0.1211783 | 0.2446566 | 108.365 | 1.147 | 107.441 | 109.649 | 105.911 | 5.972 | 99.488 | 111.297 |
| 13377 | ENSG00000065665 | SEC61A2   | -1.2 | 0.0044606 | 0.0193541 | 14.598  | 0.715 | 13.772  | 15.015  | 17.382  | 1.406 | 15.942 | 18.751  |
| 13379 | ENSG00000132432 | SEC61G    | -1.2 | 9.778E-06 | 0.0001311 | 77.386  | 0.849 | 76.517  | 78.213  | 95.350  | 2.999 | 92.039 | 97.884  |
| 13380 | ENSG00000138593 | SECISBP2L | 1.1  | 0.111016  | 0.2299588 | 26.487  | 0.550 | 26.050  | 27.105  | 25.640  | 1.030 | 24.649 | 26.705  |
| 13383 | ENSG00000085415 | SEH1L     | 1.1  | 0.1077193 | 0.2251708 | 18.914  | 0.219 | 18.665  | 19.076  | 18.348  | 0.989 | 17.395 | 19.369  |
| 13385 | ENSG00000071537 | SEL1L     | 1.1  | 0.0390869 | 0.1050428 | 18.804  | 0.756 | 17.970  | 19.446  | 17.878  | 0.548 | 17.245 | 18.209  |
| 13387 | ENSG00000091490 | SEL1L3    | 1.5  | 2.65E-16  | 6.89E-14  | 56.494  | 3.035 | 53.605  | 59.656  | 37.376  | 1.785 | 35.499 | 39.053  |
| 13388 | ENSG00000143416 | SELENBP1  | -1.1 | 0.0527347 | 0.1323887 | 10.951  | 0.830 | 10.239  | 11.863  | 12.559  | 0.921 | 11.526 | 13.296  |
| 13390 | ENSG00000211450 | SELENOH   | -1.1 | 0.0151942 | 0.0509576 | 58.249  | 2.489 | 55.663  | 60.628  | 65.386  | 2.367 | 63.035 | 67.768  |
| 13391 | ENSG00000138018 | SELENOI   | 1.2  | 1.378E-05 | 0.0001751 | 44.175  | 2.667 | 41.358  | 46.661  | 38.605  | 1.780 | 36.664 | 40.161  |
| 13395 | ENSG00000113811 | SELENOK   | 1.2  | 0.0134762 | 0.0463353 | 30.017  | 2.308 | 27.664  | 32.278  | 26.608  | 0.585 | 26.016 | 27.186  |
| 13399 | ENSG00000250722 | SELENOP   | -1.4 | 8.293E-06 | 0.0001136 | 4.479   | 0.080 | 4.416   | 4.568   | 6.530   | 0.743 | 5.751  | 7.232   |
| 13403 | ENSG00000198843 | SELENOT   | 1.1  | 0.098662  | 0.2112777 | 40.521  | 1.758 | 38.841  | 42.347  | 38.824  | 2.047 | 37.615 | 41.187  |
| 13406 | ENSG00000186838 | SELENOV   | -1.2 | 0.0397805 | 0.1064737 | 11.157  | 1.227 | 10.327  | 12.566  | 13.400  | 0.427 | 12.919 | 13.733  |
| 13408 | ENSG00000075213 | SEMA3A    | 1.1  | 0.0367918 | 0.1004778 | 7.633   | 0.583 | 7.059   | 8.224   | 7.078   | 0.216 | 6.843  | 7.266   |
| 13409 | ENSG00000012171 | SEMA3B    | 1.2  | 0.0524296 | 0.1318183 | 3.159   | 0.118 | 3.022   | 3.229   | 2.743   | 0.137 | 2.662  | 2.901   |
| 13410 | ENSG00000075223 | SEMA3C    | -2.1 | 1.748E-05 | 0.0002119 | 0.543   | 0.062 | 0.495   | 0.613   | 1.182   | 0.211 | 0.948  | 1.358   |
| 13412 | ENSG00000153993 | SEMA3D    | 1.6  | 0.0002205 | 0.0017278 | 1.457   | 0.267 | 1.209   | 1.740   | 0.915   | 0.153 | 0.776  | 1.079   |
| 13415 | ENSG00000170381 | SEMA3E    | 1.6  | 0.0300434 | 0.086357  | 0.446   | 0.067 | 0.372   | 0.503   | 0.293   | 0.048 | 0.253  | 0.346   |
| 13418 | ENSG00000001617 | SEMA3F    | -1.5 | 5.50E-12  | 4.948E-10 | 19.694  | 0.089 | 19.610  | 19.789  | 29.475  | 0.846 | 28.737 | 30.398  |
| 13421 | ENSG00000196189 | SEMA4A    | 2    | 1.98E-13  | 2.52E-11  | 12.393  | 1.143 | 11.081  | 13.169  | 6.210   | 0.463 | 5.675  | 6.488   |
| 13422 | ENSG00000185033 | SEMA4B    | -1.2 | 0.0001696 | 0.001395  | 13.164  | 0.238 | 12.927  | 13.403  | 16.253  | 1.869 | 14.563 | 18.261  |
| 13429 | ENSG00000168758 | SEMA4C    | -1.1 | 0.0006312 | 0.0040485 | 37.911  | 0.550 | 37.289  | 38.333  | 43.834  | 1.558 | 42.447 | 45.520  |
| 13431 | ENSG00000187764 | SEMA4D    | -1.2 | 8.702E-07 | 1.701E-05 | 10.985  | 0.544 | 10.395  | 11.467  | 13.898  | 0.769 | 13.024 | 14.469  |
| 13432 | ENSG00000095539 | SEMA4G    | -1.4 | 7.41E-05  | 0.0007081 | 3.638   | 0.143 | 3.485   | 3.769   | 5.136   | 0.360 | 4.819  | 5.528   |
| 13433 | ENSG00000112902 | SEMA5A    | 1.1  | 0.0311661 | 0.088904  | 6.664   | 0.257 | 6.367   | 6.823   | 6.161   | 0.333 | 5.777  | 6.361   |
| 13434 | ENSG00000082684 | SEMA5B    | -1.1 | 0.0113608 | 0.0403752 | 13.393  | 0.983 | 12.288  | 14.171  | 15.653  | 1.244 | 14.452 | 16.937  |
| 13440 | ENSG00000092421 | SEMA6A    | 1.4  | 5.37E-15  | 1.07E-12  | 125.082 | 5.663 | 119.062 | 130.304 | 91.885  | 2.947 | 89.734 | 95.244  |
| 13443 | ENSG00000167680 | SEMA6B    | -1.2 | 0.0032756 | 0.0151158 | 30.510  | 2.038 | 28.177  | 31.945  | 35.947  | 3.124 | 33.589 | 39.490  |
| 13445 | ENSG00000143434 | SEMA6C    | -1.3 | 0.0003533 | 0.0025258 | 7.363   | 0.620 | 6.994   | 8.079   | 9.538   | 1.469 | 8.217  | 11.119  |

|       | A               | B           | C    | D         | E         | F       | G      | H       | I       | J       | K      | L       | M       |
|-------|-----------------|-------------|------|-----------|-----------|---------|--------|---------|---------|---------|--------|---------|---------|
| 13453 | ENSG00000137872 | SEMA6D      | -1.5 | 0.0041302 | 0.0182385 | 0.710   | 0.107  | 0.621   | 0.829   | 1.102   | 0.133  | 0.956   | 1.216   |
| 13454 | ENSG00000138623 | SEMA7A      | -1.1 | 0.0965629 | 0.2080205 | 8.848   | 0.651  | 8.326   | 9.577   | 9.938   | 0.451  | 9.479   | 10.381  |
| 13455 | ENSG00000124233 | SEMG1       | 1.5  | 0.0002866 | 0.0021341 | 10.636  | 1.995  | 8.445   | 12.348  | 7.225   | 0.588  | 6.634   | 7.811   |
| 13456 | ENSG00000163904 | SENP2       | -1.1 | 0.0423792 | 0.1117666 | 27.019  | 0.534  | 26.423  | 27.453  | 29.567  | 0.540  | 29.146  | 30.176  |
| 13461 | ENSG00000112701 | SENP6       | 1.1  | 0.0080957 | 0.0308716 | 34.462  | 0.413  | 34.211  | 34.939  | 32.606  | 0.730  | 32.077  | 33.439  |
| 13463 | ENSG00000086475 | SEPHS1      | 1.1  | 0.0059135 | 0.0241233 | 354.950 | 9.341  | 347.000 | 365.238 | 339.252 | 5.947  | 332.465 | 343.551 |
| 13466 | ENSG00000230146 | SEPHS1P4    | -1.1 | 0.0558988 | 0.1382996 | 34.008  | 0.206  | 33.794  | 34.206  | 38.416  | 2.033  | 36.258  | 40.297  |
| 13472 | ENSG00000179918 | SEPHS2      | 1.1  | 0.0092684 | 0.0342113 | 57.756  | 3.883  | 53.455  | 61.003  | 53.404  | 0.328  | 53.056  | 53.707  |
| 13473 | ENSG00000186522 | SEPT10      | 1.1  | 0.0008101 | 0.0049197 | 82.272  | 1.583  | 80.744  | 83.906  | 76.029  | 1.888  | 73.984  | 77.707  |
| 13474 | ENSG00000138758 | SEPT11      | 1.3  | 1.95E-11  | 1.534E-09 | 55.345  | 2.090  | 52.975  | 56.925  | 43.474  | 0.837  | 42.779  | 44.403  |
| 13478 | ENSG00000168385 | SEPT2       | 1.1  | 0.0001306 | 0.0011244 | 177.813 | 3.629  | 174.247 | 181.501 | 164.940 | 1.084  | 163.687 | 165.575 |
| 13485 | ENSG00000100167 | SEPT3       | -1.1 | 0.0163561 | 0.0540083 | 24.913  | 1.174  | 23.832  | 26.162  | 28.102  | 2.007  | 26.888  | 30.419  |
| 13488 | ENSG00000184702 | SEPT5       | 1.4  | 3.341E-05 | 0.0003648 | 4.952   | 0.299  | 4.644   | 5.240   | 3.619   | 0.148  | 3.493   | 3.782   |
| 13489 | ENSG00000125354 | SEPT6       | -1.2 | 0.0041325 | 0.0182442 | 8.395   | 0.638  | 8.015   | 9.132   | 10.063  | 0.638  | 9.326   | 10.444  |
| 13490 | ENSG00000214765 | SEPT7P2     | 1.1  | 0.0981591 | 0.2104137 | 10.094  | 0.399  | 9.726   | 10.518  | 9.317   | 0.669  | 8.778   | 10.066  |
| 13493 | ENSG00000184640 | SEPT9       | -1.1 | 0.0114013 | 0.0404765 | 55.597  | 1.390  | 54.028  | 56.676  | 62.237  | 5.305  | 56.560  | 67.070  |
| 13494 | ENSG00000122335 | SERAC1      | 1.1  | 0.0897421 | 0.1977712 | 8.619   | 0.428  | 8.311   | 9.108   | 8.134   | 0.385  | 7.876   | 8.577   |
| 13503 | ENSG00000142864 | SERBP1      | -1   | 0.1195291 | 0.2421651 | 244.490 | 5.086  | 241.043 | 250.332 | 258.964 | 1.849  | 256.833 | 260.154 |
| 13505 | ENSG00000213740 | SERBP1P1    | -1.1 | 0.0196633 | 0.0621502 | 157.595 | 6.542  | 150.245 | 162.782 | 174.799 | 3.965  | 171.915 | 179.320 |
| 13508 | ENSG00000172058 | SERF1A      | 1.1  | 0.0959422 | 0.2072434 | 10.489  | 0.678  | 9.706   | 10.899  | 9.645   | 0.670  | 8.916   | 10.235  |
| 13510 | ENSG00000205572 | SERF1B      | 1.1  | 0.0911463 | 0.2002802 | 11.237  | 0.566  | 10.596  | 11.670  | 10.329  | 0.526  | 9.791   | 10.842  |
| 13512 | ENSG00000129158 | SERGEF      | 1.1  | 0.0356808 | 0.0982209 | 9.362   | 0.531  | 8.811   | 9.872   | 8.316   | 0.787  | 7.860   | 9.224   |
| 13520 | ENSG00000120742 | SERP1       | 1.1  | 0.0010443 | 0.0060865 | 82.610  | 1.355  | 81.427  | 84.089  | 76.787  | 2.710  | 73.691  | 78.730  |
| 13527 | ENSG00000021355 | SERPINB1    | -1.1 | 0.0198638 | 0.0626667 | 19.882  | 0.445  | 19.454  | 20.342  | 23.039  | 1.440  | 22.090  | 24.695  |
| 13529 | ENSG00000206073 | SERPINB4    | 3.5  | 1.437E-05 | 0.0001804 | 1.879   | 0.586  | 1.505   | 2.555   | 0.541   | 0.278  | 0.233   | 0.773   |
| 13532 | ENSG00000124570 | SERPINB6    | 1.2  | 0.0001365 | 0.001162  | 18.023  | 0.726  | 17.328  | 18.777  | 15.265  | 0.413  | 14.982  | 15.739  |
| 13534 | ENSG00000166401 | SERPINB8    | 3.2  | 0.0002736 | 0.0020575 | 0.370   | 0.143  | 0.252   | 0.529   | 0.119   | 0.047  | 0.080   | 0.171   |
| 13544 | ENSG00000170542 | SERPINB9    | 2.3  | 7.27E-23  | 1.03E-19  | 239.058 | 17.582 | 223.730 | 258.251 | 106.414 | 5.435  | 100.693 | 111.509 |
| 13547 | ENSG00000106366 | SERPINE1    | 12   | 3.41E-08  | 1.064E-06 | 40.054  | 7.294  | 33.814  | 48.073  | 3.420   | 0.380  | 2.991   | 3.714   |
| 13549 | ENSG00000135919 | SERPINE2    | 1.4  | 9.125E-05 | 0.0008401 | 28.510  | 4.748  | 24.917  | 33.893  | 20.216  | 0.923  | 19.266  | 21.109  |
| 13556 | ENSG00000132386 | SERPINF1    | -1.2 | 0.0191012 | 0.0608052 | 12.407  | 1.172  | 11.113  | 13.398  | 14.685  | 0.876  | 14.065  | 15.687  |
| 13559 | ENSG00000167711 | SERPINF2    | -1.3 | 0.109388  | 0.227534  | 1.830   | 0.290  | 1.510   | 2.075   | 2.371   | 0.427  | 2.117   | 2.864   |
| 13561 | ENSG00000149257 | SERPINH1    | 1.1  | 0.0003143 | 0.0022946 | 227.823 | 6.268  | 222.714 | 234.817 | 209.447 | 13.152 | 195.601 | 221.772 |
| 13570 | ENSG00000163536 | SERPINI1    | -1.5 | 3.092E-06 | 4.905E-05 | 7.370   | 1.431  | 6.232   | 8.976   | 11.541  | 0.286  | 11.368  | 11.871  |
| 13571 | ENSG00000197019 | SERTAD1     | 1.5  | 2.275E-05 | 0.0002658 | 12.308  | 0.989  | 11.524  | 13.418  | 8.550   | 1.374  | 7.126   | 9.868   |
| 13574 | ENSG00000179833 | SERTAD2     | -1.3 | 0.0008537 | 0.0051422 | 5.446   | 0.348  | 5.063   | 5.742   | 7.087   | 1.143  | 5.767   | 7.753   |
| 13582 | ENSG00000167565 | SERTAD3     | 1.2  | 0.0064864 | 0.0258676 | 15.670  | 1.100  | 14.844  | 16.919  | 13.232  | 0.469  | 12.904  | 13.769  |
| 13583 | ENSG00000082497 | SERTAD4     | 1.9  | 9.561E-10 | 4.701E-08 | 6.131   | 0.452  | 5.723   | 6.617   | 3.354   | 0.180  | 3.147   | 3.466   |
| 13589 | ENSG00000203706 | SERTAD4-AS1 | 1.7  | 0.0079283 | 0.0304209 | 4.327   | 1.396  | 2.943   | 5.735   | 2.652   | 0.544  | 2.025   | 2.992   |
| 13590 | ENSG00000080546 | SESN1       | -1.1 | 0.0202978 | 0.0637981 | 43.572  | 4.965  | 39.870  | 49.215  | 51.264  | 5.455  | 46.187  | 57.030  |
| 13594 | ENSG00000130766 | SESN2       | 1.3  | 3.721E-06 | 5.764E-05 | 32.682  | 1.960  | 31.152  | 34.891  | 26.339  | 2.305  | 24.556  | 28.943  |
| 13596 | ENSG00000149212 | SESN3       | -1.5 | 2.79E-13  | 3.42E-11  | 20.424  | 1.373  | 19.592  | 22.008  | 30.870  | 0.433  | 30.434  | 31.301  |

|       | A               | B       | C    | D         | E         | F       | G      | H       | I       | J       | K      | L       | M       |
|-------|-----------------|---------|------|-----------|-----------|---------|--------|---------|---------|---------|--------|---------|---------|
| 13605 | ENSG00000187231 | SESTD1  | 1.2  | 0.0002031 | 0.0016151 | 10.384  | 0.105  | 10.317  | 10.505  | 9.079   | 0.272  | 8.771   | 9.288   |
| 13607 | ENSG00000099381 | SETD1A  | -1.2 | 0.0007844 | 0.0047909 | 10.298  | 0.428  | 10.027  | 10.791  | 12.480  | 0.672  | 11.820  | 13.163  |
| 13616 | ENSG00000185917 | SETD4   | 1.6  | 1.403E-09 | 6.611E-08 | 9.107   | 0.565  | 8.456   | 9.470   | 5.980   | 0.431  | 5.729   | 6.478   |
| 13618 | ENSG00000168137 | SETD5   | -1.2 | 5.149E-09 | 2.103E-07 | 77.803  | 1.317  | 76.309  | 78.791  | 95.230  | 1.194  | 94.016  | 96.404  |
| 13619 | ENSG00000103037 | SETD6   | -1.1 | 0.0043817 | 0.0190849 | 12.222  | 0.308  | 11.870  | 12.440  | 14.337  | 0.788  | 13.737  | 15.230  |
| 13624 | ENSG00000145391 | SETD7   | 1.3  | 0.0001231 | 0.0010707 | 2.501   | 0.225  | 2.313   | 2.750   | 1.949   | 0.072  | 1.886   | 2.027   |
| 13627 | ENSG00000279730 | SETD8P1 | 1.3  | 0.0230402 | 0.0704283 | 9.087   | 0.145  | 8.931   | 9.217   | 7.278   | 0.886  | 6.515   | 8.250   |
| 13630 | ENSG00000143379 | SETDB1  | -1.1 | 0.002337  | 0.0115097 | 18.431  | 1.945  | 16.507  | 20.395  | 21.546  | 0.927  | 20.517  | 22.314  |
| 13635 | ENSG00000266648 | SETP3   | 1.2  | 0.1051817 | 0.221096  | 9.701   | 1.441  | 8.169   | 11.031  | 8.023   | 0.364  | 7.673   | 8.400   |
| 13640 | ENSG00000213526 | SETP8   | 1.2  | 0.1223115 | 0.2464445 | 19.143  | 1.591  | 17.908  | 20.938  | 16.169  | 3.031  | 13.997  | 19.632  |
| 13644 | ENSG00000107290 | SETX    | 1.1  | 0.0928212 | 0.2025032 | 26.534  | 2.309  | 24.152  | 28.763  | 25.631  | 1.002  | 24.613  | 26.616  |
| 13648 | ENSG00000099995 | SF3A1   | -1.2 | 4.753E-05 | 0.000491  | 45.683  | 3.092  | 42.178  | 48.022  | 54.442  | 2.710  | 51.996  | 57.355  |
| 13655 | ENSG00000104897 | SF3A2   | -1.2 | 0.0001265 | 0.0010966 | 39.376  | 1.976  | 37.594  | 41.501  | 48.304  | 3.081  | 45.689  | 51.700  |
| 13656 | ENSG00000115524 | SF3B1   | -1.1 | 2.486E-05 | 0.0002862 | 196.910 | 2.360  | 194.287 | 198.863 | 224.158 | 2.426  | 221.442 | 226.110 |
| 13657 | ENSG00000087365 | SF3B2   | -1.1 | 0.0006273 | 0.0040249 | 65.910  | 2.538  | 63.655  | 68.659  | 74.394  | 0.765  | 73.638  | 75.168  |
| 13662 | ENSG00000189091 | SF3B3   | -1.1 | 5.038E-06 | 7.481E-05 | 60.515  | 1.172  | 59.776  | 61.866  | 70.586  | 2.801  | 67.977  | 73.546  |
| 13670 | ENSG00000143368 | SF3B4   | -1.1 | 0.000807  | 0.0049045 | 55.388  | 1.699  | 53.928  | 57.253  | 64.843  | 3.604  | 62.673  | 69.004  |
| 13673 | ENSG00000163935 | SFMBT1  | 1.3  | 0.0001114 | 0.0009847 | 10.273  | 0.440  | 9.963   | 10.776  | 8.382   | 0.245  | 8.126   | 8.615   |
| 13676 | ENSG00000175793 | SFN     | 1.9  | 1.551E-07 | 3.999E-06 | 11.449  | 1.121  | 10.290  | 12.528  | 5.984   | 0.495  | 5.436   | 6.398   |
| 13678 | ENSG00000116560 | SFPQ    | -1.1 | 0.0014398 | 0.0078211 | 155.041 | 10.250 | 143.529 | 163.178 | 174.075 | 6.684  | 168.417 | 181.450 |
| 13679 | ENSG00000156384 | SFR1    | -1.3 | 0.0020533 | 0.0103602 | 15.011  | 0.702  | 14.224  | 15.573  | 19.314  | 2.457  | 16.917  | 21.828  |
| 13689 | ENSG00000104332 | SFRP1   | -1.1 | 0.0008344 | 0.0050434 | 457.582 | 22.421 | 431.708 | 471.302 | 515.114 | 30.850 | 479.909 | 537.426 |
| 13691 | ENSG00000061936 | SFSWAP  | -1.2 | 8.977E-05 | 0.0008279 | 16.531  | 0.498  | 15.974  | 16.935  | 19.568  | 0.683  | 18.894  | 20.259  |
| 13697 | ENSG00000213064 | SFT2D2  | 1.5  | 2.05E-10  | 1.234E-08 | 8.247   | 0.491  | 7.697   | 8.644   | 5.686   | 0.214  | 5.450   | 5.868   |
| 13703 | ENSG00000173349 | SFT2D3  | -1.1 | 0.0284481 | 0.0828443 | 15.241  | 1.059  | 14.508  | 16.455  | 17.443  | 0.564  | 16.798  | 17.838  |
| 13704 | ENSG00000156398 | SFXN2   | 1.2  | 0.016857  | 0.055274  | 3.413   | 0.234  | 3.143   | 3.549   | 2.885   | 0.421  | 2.410   | 3.209   |
| 13708 | ENSG00000107819 | SFXN3   | 1.3  | 0.0099067 | 0.0361726 | 2.238   | 0.239  | 1.962   | 2.393   | 1.696   | 0.129  | 1.621   | 1.844   |
| 13710 | ENSG00000183605 | SFXN4   | 1.2  | 0.013005  | 0.0450378 | 23.572  | 1.352  | 22.013  | 24.423  | 20.316  | 2.821  | 17.064  | 22.114  |
| 13711 | ENSG00000163069 | SGCB    | 1.2  | 0.0005072 | 0.0033974 | 29.604  | 1.620  | 28.609  | 31.473  | 26.077  | 1.139  | 24.863  | 27.122  |
| 13713 | ENSG00000127990 | SGCE    | 1.2  | 0.0132736 | 0.0458055 | 25.121  | 0.539  | 24.509  | 25.522  | 22.352  | 2.215  | 20.878  | 24.899  |
| 13714 | ENSG00000118473 | SGIP1   | 2.3  | 0.0011365 | 0.0065157 | 0.309   | 0.040  | 0.263   | 0.338   | 0.139   | 0.090  | 0.044   | 0.223   |
| 13718 | ENSG00000118515 | SGK1    | -1.2 | 0.0093228 | 0.0343972 | 2.426   | 0.256  | 2.261   | 2.721   | 3.026   | 0.222  | 2.839   | 3.271   |
| 13719 | ENSG00000104205 | SGK3    | 1.4  | 0.0045789 | 0.019766  | 1.693   | 0.261  | 1.513   | 1.992   | 1.215   | 0.139  | 1.086   | 1.361   |
| 13722 | ENSG00000164023 | SGMS2   | 1.6  | 0.0051592 | 0.0216305 | 1.171   | 0.291  | 0.870   | 1.451   | 0.753   | 0.270  | 0.468   | 1.004   |
| 13724 | ENSG00000163535 | SGO2    | -1.4 | 0.0034686 | 0.0158168 | 29.609  | 3.345  | 27.281  | 33.442  | 41.467  | 5.189  | 36.904  | 47.112  |
| 13727 | ENSG00000166224 | SGPL1   | 1.1  | 0.0003778 | 0.0026692 | 20.650  | 0.536  | 20.236  | 21.255  | 18.487  | 0.460  | 17.965  | 18.838  |
| 13735 | ENSG00000126821 | SGPP1   | 1.4  | 4.823E-07 | 1.048E-05 | 20.674  | 1.060  | 19.928  | 21.888  | 15.340  | 0.916  | 14.639  | 16.376  |
| 13736 | ENSG00000167037 | SGSM1   | -1.1 | 0.069705  | 0.163376  | 3.244   | 0.513  | 2.676   | 3.673   | 3.788   | 0.079  | 3.742   | 3.879   |
| 13737 | ENSG00000100359 | SGSM3   | -1.3 | 0.0076433 | 0.0295208 | 2.350   | 0.137  | 2.230   | 2.499   | 3.149   | 0.524  | 2.735   | 3.738   |
| 13748 | ENSG00000197860 | SGTB    | 1.1  | 0.0113487 | 0.0403406 | 12.486  | 1.196  | 11.327  | 13.716  | 11.154  | 0.731  | 10.483  | 11.933  |
| 13751 | ENSG00000178188 | SH2B1   | -1.2 | 0.0001674 | 0.0013801 | 10.690  | 0.329  | 10.380  | 11.035  | 13.346  | 0.268  | 13.057  | 13.585  |
| 13752 | ENSG00000111252 | SH2B3   | 1.7  | 4.94E-16  | 1.19E-13  | 35.318  | 2.808  | 32.338  | 37.915  | 21.303  | 0.612  | 20.827  | 21.993  |
| 13754 | ENSG00000125731 | SH2D3A  | 1.3  | 0.0004478 | 0.0030541 | 7.264   | 0.548  | 6.824   | 7.878   | 5.891   | 0.045  | 5.839   | 5.923   |

|       | A               | B        | C    | D         | E         | F       | G     | H       | I       | J       | K     | L       | M       |
|-------|-----------------|----------|------|-----------|-----------|---------|-------|---------|---------|---------|-------|---------|---------|
| 13756 | ENSG00000104611 | SH2D4A   | 1.3  | 0.0145375 | 0.0492533 | 3.952   | 0.255 | 3.669   | 4.165   | 3.190   | 0.470 | 2.696   | 3.632   |
| 13763 | ENSG00000185437 | SH3BGR   | 1.3  | 0.0003454 | 0.0024775 | 29.891  | 1.271 | 28.461  | 30.893  | 24.293  | 0.732 | 23.852  | 25.139  |
| 13768 | ENSG00000198478 | SH3BGRL2 | 1.1  | 0.109465  | 0.2276322 | 26.694  | 1.890 | 25.551  | 28.875  | 25.591  | 0.544 | 24.965  | 25.949  |
| 13769 | ENSG00000087266 | SH3BP2   | -1.1 | 0.0948595 | 0.2057925 | 9.292   | 0.781 | 8.414   | 9.909   | 10.179  | 0.595 | 9.499   | 10.604  |
| 13775 | ENSG00000175137 | SH3BP5L  | -1.1 | 0.0565403 | 0.1393567 | 16.104  | 0.588 | 15.425  | 16.444  | 17.797  | 0.287 | 17.513  | 18.087  |
| 13782 | ENSG00000109686 | SH3D19   | 1.2  | 1.579E-07 | 4.066E-06 | 39.696  | 0.045 | 39.662  | 39.747  | 33.433  | 1.253 | 32.228  | 34.728  |
| 13786 | ENSG00000107295 | SH3GL2   | 1.4  | 0.0002639 | 0.0019968 | 13.706  | 2.803 | 11.285  | 16.776  | 10.127  | 0.637 | 9.583   | 10.828  |
| 13787 | ENSG00000140600 | SH3GL3   | 1.1  | 0.0299001 | 0.086036  | 15.397  | 1.722 | 14.354  | 17.385  | 13.843  | 0.696 | 13.069  | 14.417  |
| 13790 | ENSG00000147010 | SH3KBP1  | 1.1  | 0.0974226 | 0.2093391 | 19.154  | 1.040 | 17.957  | 19.847  | 18.206  | 0.559 | 17.615  | 18.727  |
| 13798 | ENSG00000107957 | SH3PXD2A | -1.2 | 1.989E-07 | 4.934E-06 | 14.141  | 0.105 | 14.041  | 14.251  | 17.892  | 0.877 | 17.253  | 18.891  |
| 13799 | ENSG00000174705 | SH3PXD2B | 1.1  | 0.0811194 | 0.1832718 | 46.901  | 1.320 | 45.405  | 47.901  | 45.390  | 2.942 | 42.377  | 48.256  |
| 13804 | ENSG00000154447 | SH3RF1   | 1.1  | 0.0658362 | 0.1563447 | 8.376   | 0.493 | 7.823   | 8.769   | 7.744   | 0.386 | 7.318   | 8.071   |
| 13806 | ENSG00000035115 | SH3YL1   | 1.1  | 0.0118118 | 0.0416801 | 8.075   | 0.276 | 7.767   | 8.300   | 7.224   | 0.665 | 6.696   | 7.970   |
| 13807 | ENSG00000162105 | SHANK2   | -1.2 | 0.0003874 | 0.0027247 | 6.048   | 0.115 | 5.916   | 6.127   | 7.223   | 0.574 | 6.871   | 7.886   |
| 13809 | ENSG00000251322 | SHANK3   | -1.2 | 0.004002  | 0.0177698 | 5.921   | 0.121 | 5.803   | 6.044   | 7.184   | 0.705 | 6.708   | 7.993   |
| 13813 | ENSG00000179526 | SHARPIN  | -1.1 | 0.0490275 | 0.1252192 | 16.978  | 0.163 | 16.810  | 17.136  | 19.391  | 2.290 | 17.450  | 21.917  |
| 13814 | ENSG00000160691 | SHC1     | 1.1  | 0.0260818 | 0.0774168 | 131.805 | 2.521 | 129.572 | 134.539 | 126.507 | 7.971 | 121.033 | 135.651 |
| 13815 | ENSG00000129946 | SHC2     | 1.5  | 7.245E-05 | 0.0006946 | 5.355   | 0.059 | 5.293   | 5.410   | 3.579   | 0.833 | 2.626   | 4.165   |
| 13819 | ENSG00000148082 | SHC3     | 1.4  | 0.0017698 | 0.0092383 | 2.788   | 0.668 | 2.221   | 3.524   | 2.070   | 0.196 | 1.877   | 2.269   |
| 13820 | ENSG00000171241 | SHCBP1   | -1.1 | 0.0364193 | 0.0997667 | 11.030  | 0.706 | 10.238  | 11.594  | 12.619  | 0.423 | 12.136  | 12.921  |
| 13823 | ENSG00000105251 | SHD      | -1.5 | 0.0047625 | 0.0203817 | 2.390   | 0.283 | 2.153   | 2.703   | 3.550   | 0.867 | 2.818   | 4.507   |
| 13825 | ENSG00000169291 | SHE      | 1.4  | 0.0122403 | 0.0429325 | 1.065   | 0.213 | 0.822   | 1.218   | 0.769   | 0.057 | 0.704   | 0.811   |
| 13832 | ENSG00000180730 | SHISA2   | -1.5 | 4.163E-05 | 0.0004406 | 6.873   | 0.803 | 6.199   | 7.762   | 10.708  | 2.443 | 8.519   | 13.343  |
| 13834 | ENSG00000198892 | SHISA4   | 1.4  | 0.0011052 | 0.0063841 | 11.510  | 0.745 | 10.655  | 12.015  | 8.300   | 1.060 | 7.471   | 9.495   |
| 13838 | ENSG00000188803 | SHISA6   | 1.5  | 0.0005689 | 0.0037177 | 1.807   | 0.191 | 1.610   | 1.992   | 1.244   | 0.065 | 1.174   | 1.302   |
| 13844 | ENSG00000187902 | SHISA7   | -1.4 | 0.0897678 | 0.1977712 | 0.374   | 0.076 | 0.291   | 0.441   | 0.531   | 0.075 | 0.466   | 0.613   |
| 13846 | ENSG00000176974 | SHMT1    | 1.2  | 0.0005613 | 0.0036783 | 16.276  | 0.592 | 15.634  | 16.799  | 14.229  | 0.538 | 13.707  | 14.781  |
| 13859 | ENSG00000182199 | SHMT2    | 1.5  | 4.91E-17  | 1.54E-14  | 154.098 | 2.165 | 152.773 | 156.596 | 106.246 | 5.273 | 101.436 | 111.884 |
| 13864 | ENSG00000108061 | SHOC2    | -1.1 | 0.0368354 | 0.1005182 | 24.023  | 0.393 | 23.617  | 24.402  | 26.801  | 1.180 | 25.948  | 28.147  |
| 13866 | ENSG00000146414 | SHPRH    | 1.1  | 0.0043665 | 0.0190434 | 12.504  | 0.348 | 12.198  | 12.883  | 11.635  | 0.105 | 11.528  | 11.737  |
| 13876 | ENSG00000138771 | SHROOM3  | -1.1 | 0.0184686 | 0.0592264 | 15.542  | 0.180 | 15.338  | 15.681  | 17.256  | 1.032 | 16.094  | 18.066  |
| 13884 | ENSG00000158352 | SHROOM4  | -1.1 | 0.0701123 | 0.1640777 | 2.546   | 0.142 | 2.422   | 2.701   | 2.946   | 0.339 | 2.724   | 3.337   |
| 13891 | ENSG00000187164 | SHTN1    | 1.4  | 5.10E-11  | 3.593E-09 | 14.753  | 0.619 | 14.054  | 15.229  | 10.402  | 0.322 | 10.051  | 10.685  |
| 13904 | ENSG00000110013 | SIAE     | 1.4  | 0.000651  | 0.0041437 | 1.965   | 0.164 | 1.776   | 2.068   | 1.386   | 0.323 | 1.153   | 1.755   |
| 13910 | ENSG00000181788 | SIAH2    | 1.4  | 6.897E-07 | 1.407E-05 | 18.168  | 0.060 | 18.104  | 18.223  | 13.277  | 1.597 | 12.308  | 15.120  |
| 13913 | ENSG00000185187 | SIGIRR   | -1.2 | 0.0013049 | 0.0072498 | 15.623  | 0.957 | 14.664  | 16.578  | 19.112  | 0.263 | 18.951  | 19.416  |
| 13917 | ENSG00000197046 | SIGLEC15 | -1.7 | 0.0062388 | 0.0251168 | 0.646   | 0.238 | 0.451   | 0.911   | 1.148   | 0.168 | 1.020   | 1.338   |
| 13920 | ENSG00000142178 | SIK1     | 1.4  | 0.0003283 | 0.0023706 | 4.037   | 0.573 | 3.495   | 4.636   | 2.963   | 0.058 | 2.903   | 3.020   |

|       | A               | B           | C    | D         | E         | F       | G     | H       | I       | J       | K      | L       | M       |
|-------|-----------------|-------------|------|-----------|-----------|---------|-------|---------|---------|---------|--------|---------|---------|
| 13923 | ENSG00000105738 | SIPA1L3     | -1.1 | 0.0680412 | 0.1603628 | 8.031   | 0.250 | 7.743   | 8.188   | 9.006   | 0.890  | 8.475   | 10.033  |
| 13925 | ENSG00000096717 | SIRT1       | -1.2 | 1.193E-08 | 4.341E-07 | 59.091  | 2.989 | 57.066  | 62.524  | 75.195  | 0.922  | 74.331  | 76.165  |
| 13937 | ENSG00000068903 | SIRT2       | 1.3  | 0.0033509 | 0.0153838 | 4.894   | 0.106 | 4.795   | 5.005   | 3.955   | 0.248  | 3.700   | 4.196   |
| 13938 | ENSG00000089163 | SIRT4       | -1.3 | 0.057136  | 0.1404158 | 4.728   | 0.263 | 4.473   | 4.999   | 6.192   | 0.867  | 5.375   | 7.102   |
| 13943 | ENSG00000124523 | SIRT5       | 1.4  | 2.678E-06 | 4.36E-05  | 12.222  | 0.859 | 11.494  | 13.169  | 9.153   | 1.412  | 7.874   | 10.668  |
| 13950 | ENSG00000077463 | SIRT6       | -1.3 | 0.0019616 | 0.0100172 | 7.314   | 0.926 | 6.415   | 8.264   | 9.614   | 0.611  | 9.162   | 10.309  |
| 13970 | ENSG00000184990 | SIVA1       | -1.1 | 0.0300869 | 0.0864378 | 19.240  | 0.589 | 18.560  | 19.599  | 21.957  | 2.060  | 19.952  | 24.069  |
| 13978 | ENSG00000154839 | SKA1        | 1.1  | 0.0301743 | 0.0866742 | 22.437  | 0.578 | 21.834  | 22.987  | 20.645  | 0.373  | 20.305  | 21.045  |
| 13980 | ENSG00000165480 | SKA3        | 1.3  | 1.263E-08 | 4.545E-07 | 51.206  | 4.208 | 46.387  | 54.156  | 38.858  | 2.671  | 36.534  | 41.776  |
| 13982 | ENSG00000005020 | SKAP2       | 1.2  | 0.0238355 | 0.0723363 | 2.684   | 0.217 | 2.436   | 2.835   | 2.200   | 0.140  | 2.056   | 2.335   |
| 13987 | ENSG00000136603 | SKIL        | -1.2 | 0.0012192 | 0.006885  | 17.190  | 1.471 | 16.082  | 18.859  | 21.751  | 0.157  | 21.585  | 21.896  |
| 13993 | ENSG00000039123 | SKIV2L2     | -1.1 | 0.0001511 | 0.0012642 | 64.171  | 1.102 | 62.942  | 65.069  | 73.426  | 1.244  | 72.031  | 74.419  |
| 13996 | ENSG00000145604 | SKP2        | 1.1  | 0.0098416 | 0.0359892 | 44.189  | 0.391 | 43.741  | 44.459  | 41.338  | 0.801  | 40.596  | 42.187  |
| 13999 | ENSG00000120519 | SLC10A7     | 1.2  | 0.0487856 | 0.1247145 | 1.942   | 0.083 | 1.872   | 2.033   | 1.619   | 0.265  | 1.380   | 1.904   |
| 14001 | ENSG00000074803 | SLC12A1     | -1.7 | 0.0061711 | 0.0249155 | 0.214   | 0.051 | 0.178   | 0.272   | 0.367   | 0.032  | 0.338   | 0.401   |
| 14003 | ENSG00000124067 | SLC12A4     | 1.1  | 0.0019849 | 0.0101114 | 20.168  | 0.971 | 19.409  | 21.262  | 18.153  | 1.564  | 16.451  | 19.526  |
| 14005 | ENSG00000140199 | SLC12A6     | 1.1  | 0.0043091 | 0.0188319 | 8.936   | 0.550 | 8.428   | 9.520   | 7.974   | 0.546  | 7.536   | 8.585   |
| 14008 | ENSG00000113504 | SLC12A7     | -1.1 | 0.004447  | 0.0193099 | 19.225  | 0.282 | 18.900  | 19.406  | 22.454  | 2.241  | 20.918  | 25.025  |
| 14014 | ENSG00000221955 | SLC12A8     | 1.1  | 0.0927285 | 0.2024681 | 4.757   | 0.648 | 4.018   | 5.228   | 4.271   | 0.434  | 3.914   | 4.754   |
| 14016 | ENSG00000158296 | SLC13A3     | 1.1  | 0.0116792 | 0.0413244 | 11.208  | 0.423 | 10.753  | 11.590  | 10.011  | 0.994  | 8.875   | 10.719  |
| 14018 | ENSG00000088386 | SLC15A1     | 1.7  | 0.0004715 | 0.0031885 | 1.850   | 0.168 | 1.691   | 2.026   | 1.135   | 0.197  | 0.916   | 1.297   |
| 14052 | ENSG00000110446 | SLC15A3     | -1.2 | 0.0600048 | 0.1456363 | 4.230   | 0.333 | 3.960   | 4.603   | 4.979   | 0.840  | 4.341   | 5.931   |
| 14060 | ENSG00000139370 | SLC15A4     | 1.1  | 0.0146227 | 0.0494529 | 11.120  | 0.432 | 10.626  | 11.425  | 10.096  | 0.218  | 9.890   | 10.324  |
| 14064 | ENSG00000155380 | SLC16A1     | -1.2 | 8.51E-08  | 2.363E-06 | 359.982 | 6.346 | 352.690 | 364.248 | 431.397 | 11.357 | 418.285 | 438.183 |
| 14065 | ENSG00000226419 | SLC16A1-AS1 | -1.2 | 0.008743  | 0.0327004 | 3.394   | 0.483 | 2.971   | 3.920   | 4.127   | 0.103  | 4.050   | 4.243   |
| 14066 | ENSG00000112394 | SLC16A10    | 1.3  | 0.00012   | 0.0010494 | 3.366   | 0.128 | 3.232   | 3.487   | 2.658   | 0.090  | 2.557   | 2.728   |
| 14067 | ENSG00000174327 | SLC16A13    | 1.6  | 0.0004012 | 0.0028017 | 4.046   | 0.194 | 3.823   | 4.174   | 2.541   | 0.462  | 2.232   | 3.073   |
| 14068 | ENSG00000163053 | SLC16A14    | 1.2  | 0.0122864 | 0.043021  | 5.131   | 0.292 | 4.940   | 5.466   | 4.282   | 0.601  | 3.644   | 4.838   |
| 14069 | ENSG00000147100 | SLC16A2     | 1.2  | 0.0045638 | 0.0197107 | 35.371  | 5.199 | 29.399  | 38.882  | 30.044  | 2.405  | 27.789  | 32.576  |
| 14070 | ENSG00000141526 | SLC16A3     | -2.1 | 3.915E-07 | 8.769E-06 | 0.584   | 0.184 | 0.460   | 0.795   | 1.238   | 0.086  | 1.150   | 1.321   |
| 14071 | ENSG00000170190 | SLC16A5     | 1.2  | 0.0113755 | 0.0404189 | 19.279  | 1.266 | 17.828  | 20.160  | 17.120  | 1.290  | 16.138  | 18.582  |
| 14072 | ENSG00000118596 | SLC16A7     | 1.3  | 0.0017571 | 0.0092098 | 1.539   | 0.103 | 1.428   | 1.633   | 1.204   | 0.032  | 1.172   | 1.236   |
| 14073 | ENSG00000165449 | SLC16A9     | 1.5  | 4.018E-09 | 1.678E-07 | 18.208  | 2.287 | 15.568  | 19.581  | 12.084  | 1.239  | 10.814  | 13.289  |
| 14074 | ENSG00000119899 | SLC17A5     | 1.3  | 2.213E-05 | 0.0002592 | 25.941  | 1.918 | 23.770  | 27.407  | 20.488  | 3.078  | 16.935  | 22.349  |
| 14075 | ENSG00000101194 | SLC17A9     | -1.2 | 0.0030978 | 0.0144772 | 11.845  | 1.572 | 10.470  | 13.558  | 14.322  | 0.594  | 13.693  | 14.872  |
| 14076 | ENSG00000165646 | SLC18A2     | -1.2 | 0.0011682 | 0.006666  | 9.434   | 0.726 | 8.698   | 10.149  | 11.821  | 1.049  | 10.767  | 12.865  |
| 14077 | ENSG00000146409 | SLC18B1     | 1.2  | 0.0006395 | 0.0040847 | 34.848  | 0.732 | 34.253  | 35.665  | 30.468  | 1.196  | 29.226  | 31.613  |
| 14079 | ENSG00000117479 | SLC19A2     | 1.3  | 3.583E-09 | 1.534E-07 | 46.319  | 0.619 | 45.657  | 46.886  | 36.085  | 1.441  | 34.436  | 37.096  |
| 14080 | ENSG00000135917 | SLC19A3     | 1.2  | 0.0314438 | 0.0895059 | 3.952   | 0.481 | 3.438   | 4.391   | 3.315   | 0.310  | 3.111   | 3.672   |
| 14081 | ENSG00000115902 | SLC1A4      | 5.5  | 3.027E-06 | 4.817E-05 | 0.341   | 0.092 | 0.277   | 0.447   | 0.062   | 0.015  | 0.045   | 0.072   |
| 14083 | ENSG00000105281 | SLC1A5      | 1.5  | 6.50E-11  | 4.399E-09 | 191.898 | 9.253 | 181.277 | 198.215 | 132.395 | 10.755 | 122.861 | 144.054 |
| 14084 | ENSG00000144136 | SLC20A1     | 1.6  | 1.38E-15  | 2.92E-13  | 35.703  | 0.741 | 35.102  | 36.531  | 23.381  | 0.876  | 22.413  | 24.117  |

|       | A               | B            | C    | D         | E         | F       | G      | H       | I       | J       | K      | L       | M       |
|-------|-----------------|--------------|------|-----------|-----------|---------|--------|---------|---------|---------|--------|---------|---------|
| 14085 | ENSG00000168575 | SLC20A2      | 1.1  | 0.0379298 | 0.1027396 | 16.377  | 0.458  | 15.973  | 16.874  | 15.352  | 1.056  | 14.358  | 16.460  |
| 14086 | ENSG00000163393 | SLC22A15     | -1.1 | 0.1053693 | 0.2212473 | 4.252   | 0.660  | 3.547   | 4.855   | 4.927   | 0.403  | 4.607   | 5.379   |
| 14087 | ENSG00000197847 | SLC22A20     | -1.4 | 0.0024265 | 0.0118541 | 2.541   | 0.212  | 2.383   | 2.781   | 3.528   | 0.195  | 3.327   | 3.716   |
| 14088 | ENSG00000137266 | SLC22A23     | 1.2  | 8.905E-05 | 0.0008221 | 9.526   | 0.893  | 8.933   | 10.553  | 7.886   | 0.614  | 7.522   | 8.595   |
| 14089 | ENSG00000259803 | SLC22A31     | -1.2 | 0.0823944 | 0.1857157 | 3.340   | 0.691  | 2.547   | 3.818   | 4.151   | 0.474  | 3.645   | 4.584   |
| 14090 | ENSG00000089057 | SLC23A2      | 1.2  | 0.0002985 | 0.0022021 | 11.392  | 0.469  | 10.911  | 11.847  | 9.791   | 0.218  | 9.553   | 9.981   |
| 14091 | ENSG00000074621 | SLC24A1      | 1.3  | 0.0008742 | 0.0052413 | 6.080   | 1.059  | 5.120   | 7.216   | 4.863   | 0.365  | 4.501   | 5.231   |
| 14092 | ENSG00000155886 | SLC24A2      | 1.3  | 0.0011086 | 0.0063991 | 2.770   | 0.020  | 2.747   | 2.786   | 2.216   | 0.156  | 2.080   | 2.386   |
| 14093 | ENSG00000140090 | SLC24A4      | -1.4 | 0.1037345 | 0.219014  | 0.147   | 0.044  | 0.113   | 0.196   | 0.219   | 0.069  | 0.140   | 0.266   |
| 14094 | ENSG00000004864 | SLC25A13     | 1.2  | 2.783E-06 | 4.493E-05 | 84.355  | 2.028  | 82.564  | 86.557  | 72.990  | 3.806  | 69.994  | 77.272  |
| 14096 | ENSG00000102078 | SLC25A14     | 1.2  | 0.0169934 | 0.0555881 | 6.724   | 0.986  | 5.595   | 7.414   | 5.594   | 0.115  | 5.491   | 5.717   |
| 14097 | ENSG00000102743 | SLC25A15     | 1.3  | 1.419E-05 | 0.000179  | 35.221  | 1.019  | 34.145  | 36.172  | 27.927  | 1.441  | 26.391  | 29.251  |
| 14098 | ENSG00000122912 | SLC25A16     | 1.3  | 0.0013683 | 0.0075185 | 3.677   | 0.385  | 3.346   | 4.100   | 2.917   | 0.320  | 2.642   | 3.267   |
| 14099 | ENSG00000100372 | SLC25A17     | 1.1  | 0.063023  | 0.1513643 | 25.358  | 1.132  | 24.202  | 26.464  | 23.830  | 2.051  | 21.685  | 25.771  |
| 14100 | ENSG00000125454 | SLC25A19     | -1.3 | 0.0009867 | 0.0058006 | 6.299   | 0.366  | 5.881   | 6.560   | 8.372   | 1.111  | 7.493   | 9.622   |
| 14101 | ENSG00000183032 | SLC25A21     | 1.4  | 7.42E-05  | 0.0007086 | 6.452   | 0.432  | 5.955   | 6.738   | 4.620   | 0.531  | 4.011   | 4.991   |
| 14102 | ENSG00000258708 | SLC25A21-AS1 | -1.2 | 0.0433082 | 0.1136497 | 11.142  | 1.572  | 9.982   | 12.932  | 13.440  | 0.832  | 12.915  | 14.399  |
| 14103 | ENSG00000125648 | SLC25A23     | 1.1  | 0.0197584 | 0.0623806 | 27.161  | 1.750  | 25.266  | 28.715  | 25.156  | 0.885  | 24.306  | 26.072  |
| 14104 | ENSG00000085491 | SLC25A24     | 1.4  | 7.93E-12  | 6.983E-10 | 23.140  | 0.998  | 22.450  | 24.284  | 16.349  | 0.744  | 15.740  | 17.178  |
| 14105 | ENSG00000148339 | SLC25A25     | 1.1  | 0.101259  | 0.214961  | 12.003  | 0.182  | 11.875  | 12.212  | 11.027  | 1.551  | 9.659   | 12.713  |
| 14106 | ENSG00000197119 | SLC25A29     | -1.2 | 2.642E-05 | 0.0002998 | 47.753  | 1.198  | 46.388  | 48.629  | 56.142  | 2.959  | 53.795  | 59.466  |
| 14107 | ENSG00000114120 | SLC25A36     | 1.1  | 0.0067175 | 0.0266135 | 62.086  | 0.302  | 61.751  | 62.335  | 58.607  | 1.464  | 56.966  | 59.779  |
| 14108 | ENSG00000147454 | SLC25A37     | -1.3 | 2.169E-07 | 5.279E-06 | 20.741  | 1.468  | 19.047  | 21.615  | 26.783  | 1.896  | 24.647  | 28.269  |
| 14109 | ENSG00000144659 | SLC25A38     | -1.2 | 0.002368  | 0.0116457 | 31.841  | 1.488  | 30.202  | 33.108  | 37.939  | 1.873  | 36.155  | 39.890  |
| 14111 | ENSG00000075303 | SLC25A40     | 1.1  | 0.022882  | 0.0700459 | 17.346  | 0.678  | 16.574  | 17.842  | 15.973  | 1.145  | 15.130  | 17.277  |
| 14112 | ENSG00000181035 | SLC25A42     | -1.4 | 1.769E-05 | 0.0002139 | 4.273   | 0.423  | 3.790   | 4.577   | 6.304   | 0.524  | 5.711   | 6.701   |
| 14113 | ENSG00000160785 | SLC25A44     | 1.2  | 0.0015662 | 0.0083824 | 12.247  | 0.260  | 11.952  | 12.441  | 10.773  | 0.294  | 10.477  | 11.066  |
| 14114 | ENSG00000164209 | SLC25A46     | 1.2  | 1.043E-05 | 0.0001378 | 13.275  | 0.559  | 12.664  | 13.761  | 10.899  | 0.872  | 9.900   | 11.505  |
| 14115 | ENSG00000005022 | SLC25A5      | -1.1 | 0.0370898 | 0.1010144 | 622.744 | 16.685 | 604.681 | 637.579 | 671.435 | 1.731  | 669.662 | 673.120 |
| 14117 | ENSG00000181045 | SLC26A11     | -1.2 | 0.00593   | 0.0241673 | 5.952   | 0.202  | 5.725   | 6.113   | 7.308   | 0.475  | 6.763   | 7.624   |
| 14118 | ENSG00000225697 | SLC26A6      | -1.2 | 2.528E-05 | 0.0002899 | 14.194  | 0.628  | 13.469  | 14.572  | 18.024  | 1.546  | 16.717  | 19.731  |
| 14119 | ENSG00000147606 | SLC26A7      | -3.2 | 1.53E-05  | 0.0001894 | 0.189   | 0.064  | 0.141   | 0.261   | 0.630   | 0.148  | 0.520   | 0.798   |
| 14120 | ENSG00000140284 | SLC27A2      | 1.3  | 0.0064536 | 0.0257792 | 6.646   | 0.755  | 6.060   | 7.497   | 5.200   | 0.533  | 4.646   | 5.709   |
| 14121 | ENSG00000113396 | SLC27A6      | 1.2  | 0.0191902 | 0.0609944 | 8.270   | 0.396  | 7.867   | 8.658   | 7.008   | 0.383  | 6.671   | 7.425   |
| 14122 | ENSG00000174669 | SLC29A2      | 1.3  | 2.704E-05 | 0.0003057 | 30.789  | 1.889  | 29.602  | 32.967  | 24.878  | 1.229  | 23.806  | 26.220  |
| 14123 | ENSG00000198246 | SLC29A3      | 1.2  | 0.0127428 | 0.0442544 | 8.756   | 0.084  | 8.659   | 8.807   | 7.324   | 1.038  | 6.404   | 8.449   |
| 14124 | ENSG00000164638 | SLC29A4      | -1.3 | 0.0006996 | 0.0043712 | 4.007   | 0.329  | 3.633   | 4.256   | 5.402   | 0.491  | 4.944   | 5.921   |
| 14125 | ENSG00000117394 | SLC2A1       | 1.3  | 3.878E-09 | 1.64E-07  | 115.565 | 3.058  | 112.125 | 117.979 | 93.515  | 8.034  | 84.380  | 99.484  |
| 14126 | ENSG00000197496 | SLC2A10      | 1.2  | 2.114E-05 | 0.0002493 | 17.588  | 0.583  | 16.920  | 17.995  | 14.445  | 0.946  | 13.718  | 15.515  |
| 14127 | ENSG00000146411 | SLC2A12      | 1.2  | 0.021946  | 0.067815  | 17.937  | 3.614  | 15.005  | 21.975  | 15.589  | 0.615  | 14.981  | 16.211  |
| 14128 | ENSG00000173262 | SLC2A14      | 1.1  | 0.0765037 | 0.1750889 | 16.860  | 0.597  | 16.435  | 17.542  | 15.933  | 1.054  | 15.301  | 17.150  |
| 14129 | ENSG00000059804 | SLC2A3       | 1.2  | 4.907E-10 | 2.594E-08 | 527.030 | 11.337 | 515.780 | 538.451 | 442.026 | 15.400 | 427.304 | 458.025 |



|       | A               | B        | C    | D         | E         | F       | G      | H       | I       | J       | K     | L       | M       |
|-------|-----------------|----------|------|-----------|-----------|---------|--------|---------|---------|---------|-------|---------|---------|
| 14130 | ENSG00000181856 | SLC2A4   | -1.2 | 0.044239  | 0.1156615 | 4.476   | 0.680  | 3.719   | 5.036   | 5.459   | 0.730 | 4.836   | 6.262   |
| 14131 | ENSG00000160326 | SLC2A6   | 1.2  | 0.0097918 | 0.0358382 | 7.974   | 1.118  | 6.818   | 9.051   | 6.679   | 0.609 | 6.034   | 7.246   |
| 14132 | ENSG00000170385 | SLC30A1  | 1.2  | 0.0001384 | 0.001176  | 30.733  | 2.889  | 28.932  | 34.066  | 26.405  | 0.407 | 26.016  | 26.828  |
| 14133 | ENSG00000115194 | SLC30A3  | 1.4  | 0.0001194 | 0.0010459 | 5.619   | 0.981  | 4.643   | 6.604   | 4.118   | 0.186 | 3.908   | 4.260   |
| 14134 | ENSG00000152683 | SLC30A6  | -1.1 | 0.0089205 | 0.0332245 | 21.189  | 0.805  | 20.296  | 21.860  | 23.996  | 0.808 | 23.185  | 24.802  |
| 14135 | ENSG00000162695 | SLC30A7  | 1.1  | 0.0975999 | 0.2095871 | 8.756   | 0.252  | 8.467   | 8.925   | 8.192   | 0.768 | 7.379   | 8.906   |
| 14136 | ENSG0000014824  | SLC30A9  | 1.1  | 0.0852505 | 0.1902165 | 49.623  | 1.117  | 48.335  | 50.324  | 48.253  | 1.105 | 47.515  | 49.524  |
| 14137 | ENSG00000169359 | SLC33A1  | -1.1 | 0.1079763 | 0.2254851 | 9.085   | 0.110  | 8.984   | 9.202   | 10.000  | 0.653 | 9.268   | 10.523  |
| 14138 | ENSG00000157765 | SLC34A2  | 1.4  | 0.1047989 | 0.2205928 | 0.620   | 0.162  | 0.440   | 0.754   | 0.453   | 0.052 | 0.397   | 0.499   |
| 14139 | ENSG00000164414 | SLC35A1  | 1.4  | 0.0002277 | 0.0017714 | 10.057  | 1.601  | 8.298   | 11.432  | 7.186   | 0.454 | 6.902   | 7.710   |
| 14140 | ENSG00000117620 | SLC35A3  | 1.2  | 0.007267  | 0.0283262 | 3.952   | 0.084  | 3.872   | 4.040   | 3.494   | 0.177 | 3.372   | 3.697   |
| 14141 | ENSG00000121073 | SLC35B1  | 1.2  | 0.0001572 | 0.0013087 | 16.315  | 0.496  | 16.000  | 16.887  | 13.643  | 1.510 | 12.208  | 15.218  |
| 14142 | ENSG00000157593 | SLC35B2  | 1.2  | 1.475E-05 | 0.0001837 | 45.110  | 0.379  | 44.765  | 45.516  | 37.510  | 0.875 | 37.001  | 38.521  |
| 14146 | ENSG00000124786 | SLC35B3  | -1.2 | 0.0048683 | 0.0207347 | 15.961  | 1.396  | 14.641  | 17.422  | 19.761  | 2.232 | 17.369  | 21.788  |
| 14147 | ENSG00000205060 | SLC35B4  | 1.2  | 3.245E-05 | 0.0003562 | 33.170  | 0.615  | 32.586  | 33.812  | 29.209  | 1.471 | 27.897  | 30.800  |
| 14148 | ENSG00000181830 | SLC35C1  | -1.1 | 0.0250627 | 0.0750905 | 8.810   | 0.456  | 8.334   | 9.242   | 10.199  | 0.230 | 9.997   | 10.450  |
| 14149 | ENSG00000130958 | SLC35D2  | 1.2  | 0.0077651 | 0.0299322 | 23.239  | 1.179  | 22.466  | 24.596  | 20.450  | 0.650 | 19.736  | 21.007  |
| 14151 | ENSG00000182747 | SLC35D3  | 1.8  | 0.0007248 | 0.0044953 | 2.492   | 0.555  | 2.003   | 3.095   | 1.374   | 0.270 | 1.119   | 1.657   |
| 14152 | ENSG00000189339 | SLC35E2B | -1.1 | 0.0356043 | 0.0980743 | 19.320  | 1.023  | 18.405  | 20.425  | 21.343  | 0.346 | 20.958  | 21.625  |
| 14153 | ENSG00000100036 | SLC35E4  | -1.3 | 0.0090704 | 0.0336321 | 1.643   | 0.205  | 1.416   | 1.815   | 2.217   | 0.091 | 2.142   | 2.319   |
| 14154 | ENSG00000183780 | SLC35F3  | 1.3  | 0.0752742 | 0.1729008 | 2.735   | 0.475  | 2.449   | 3.283   | 2.213   | 0.253 | 1.944   | 2.448   |
| 14155 | ENSG00000151812 | SLC35F4  | 5.2  | 0.0380461 | 0.1029519 | 0.082   | 0.021  | 0.070   | 0.105   | 0.012   | 0.021 | 0.000   | 0.037   |
| 14156 | ENSG00000115084 | SLC35F5  | 1.1  | 0.0029067 | 0.0137055 | 15.076  | 0.732  | 14.367  | 15.829  | 13.457  | 0.110 | 13.340  | 13.559  |
| 14157 | ENSG00000213699 | SLC35F6  | 1.4  | 6.067E-06 | 8.726E-05 | 9.592   | 0.258  | 9.308   | 9.813   | 7.058   | 0.312 | 6.734   | 7.356   |
| 14158 | ENSG00000176273 | SLC35G1  | 1.3  | 0.0002257 | 0.0017586 | 5.134   | 0.589  | 4.454   | 5.476   | 3.926   | 0.396 | 3.470   | 4.184   |
| 14159 | ENSG00000168917 | SLC35G2  | 1.2  | 0.0613256 | 0.1480446 | 3.697   | 0.269  | 3.478   | 3.998   | 3.182   | 0.396 | 2.789   | 3.581   |
| 14160 | ENSG00000180773 | SLC36A4  | -1.1 | 0.0292454 | 0.0846239 | 13.350  | 0.345  | 12.953  | 13.553  | 14.913  | 1.053 | 13.758  | 15.819  |
| 14161 | ENSG00000160190 | SLC37A1  | -1.1 | 0.0212012 | 0.0660528 | 7.905   | 0.310  | 7.627   | 8.239   | 9.126   | 0.716 | 8.327   | 9.709   |
| 14163 | ENSG00000157800 | SLC37A3  | -1.1 | 0.003697  | 0.0166472 | 15.904  | 0.574  | 15.309  | 16.455  | 18.009  | 0.333 | 17.799  | 18.393  |
| 14164 | ENSG00000137700 | SLC37A4  | -1.1 | 0.0169639 | 0.0555384 | 27.877  | 1.772  | 26.040  | 29.575  | 31.055  | 0.918 | 30.054  | 31.856  |
| 14165 | ENSG00000111371 | SLC38A1  | 1.3  | 2.48E-12  | 2.492E-10 | 117.551 | 5.812  | 111.155 | 122.509 | 91.037  | 1.953 | 89.401  | 93.199  |
| 14166 | ENSG00000157637 | SLC38A10 | 1.3  | 5.433E-05 | 0.0005473 | 10.424  | 0.411  | 9.950   | 10.665  | 8.473   | 0.596 | 7.786   | 8.856   |
| 14167 | ENSG00000134294 | SLC38A2  | 1.3  | 1.936E-06 | 3.301E-05 | 248.708 | 21.631 | 226.276 | 269.437 | 201.090 | 7.459 | 193.148 | 207.948 |
| 14168 | ENSG00000139974 | SLC38A6  | 1.3  | 0.0086503 | 0.0324181 | 3.204   | 0.120  | 3.069   | 3.300   | 2.587   | 0.229 | 2.325   | 2.746   |
| 14169 | ENSG00000103042 | SLC38A7  | 1.3  | 1.089E-06 | 2.057E-05 | 11.681  | 0.408  | 11.444  | 12.151  | 9.046   | 0.621 | 8.522   | 9.732   |
| 14170 | ENSG00000177058 | SLC38A9  | 1.2  | 0.0001749 | 0.0014318 | 10.022  | 0.875  | 9.376   | 11.018  | 8.428   | 0.546 | 7.802   | 8.801   |
| 14171 | ENSG00000133195 | SLC39A11 | 1.2  | 0.0069726 | 0.0274377 | 5.856   | 0.432  | 5.554   | 6.351   | 4.982   | 0.374 | 4.566   | 5.291   |
| 14172 | ENSG00000104635 | SLC39A14 | 1.1  | 0.0106562 | 0.0383627 | 74.853  | 5.059  | 71.209  | 80.628  | 70.203  | 5.653 | 65.189  | 76.330  |
| 14173 | ENSG00000141424 | SLC39A6  | 1.1  | 0.0170807 | 0.0557854 | 55.738  | 1.470  | 54.180  | 57.101  | 52.675  | 0.696 | 52.076  | 53.438  |
| 14174 | ENSG00000112473 | SLC39A7  | -1.1 | 0.0034011 | 0.0155845 | 109.342 | 2.506  | 106.463 | 111.025 | 122.474 | 6.831 | 114.960 | 128.308 |
| 14175 | ENSG00000138821 | SLC39A8  | 1.4  | 2.361E-08 | 7.891E-07 | 10.772  | 0.973  | 10.162  | 11.894  | 7.747   | 0.309 | 7.391   | 7.957   |
| 14176 | ENSG00000168003 | SLC3A2   | 1.3  | 2.43E-13  | 3.03E-11  | 159.214 | 5.455  | 152.934 | 162.776 | 121.730 | 2.778 | 118.919 | 124.473 |
| 14177 | ENSG00000136052 | SLC41A2  | 1.7  | 0.0002107 | 0.0016617 | 1.619   | 0.209  | 1.417   | 1.834   | 0.952   | 0.144 | 0.814   | 1.102   |

|       | A               | B        | C    | D         | E         | F       | G      | H       | I       | J       | K      | L       | M       |
|-------|-----------------|----------|------|-----------|-----------|---------|--------|---------|---------|---------|--------|---------|---------|
| 14178 | ENSG00000114544 | SLC41A3  | 1.1  | 0.0977268 | 0.2097796 | 12.713  | 0.733  | 11.960  | 13.425  | 12.004  | 0.634  | 11.365  | 12.633  |
| 14179 | ENSG00000149150 | SLC43A1  | 1.4  | 6.557E-08 | 1.877E-06 | 17.855  | 1.419  | 16.261  | 18.982  | 12.652  | 0.484  | 12.143  | 13.107  |
| 14180 | ENSG00000167703 | SLC43A2  | 1.1  | 0.095699  | 0.2068972 | 2.118   | 0.245  | 1.894   | 2.380   | 1.896   | 0.228  | 1.636   | 2.064   |
| 14181 | ENSG00000070214 | SLC44A1  | 1.1  | 0.0139146 | 0.0475491 | 37.692  | 0.826  | 36.851  | 38.501  | 35.917  | 1.268  | 34.620  | 37.153  |
| 14182 | ENSG00000129353 | SLC44A2  | -1.1 | 0.0043692 | 0.0190503 | 52.433  | 1.365  | 50.866  | 53.363  | 59.028  | 4.264  | 54.168  | 62.138  |
| 14185 | ENSG00000143036 | SLC44A3  | 1.2  | 0.0980709 | 0.210278  | 4.559   | 0.744  | 3.999   | 5.404   | 3.888   | 0.704  | 3.083   | 4.385   |
| 14186 | ENSG00000204385 | SLC44A4  | 1.2  | 0.0912529 | 0.2004104 | 3.793   | 0.887  | 2.874   | 4.645   | 3.199   | 0.144  | 3.110   | 3.365   |
| 14187 | ENSG00000137968 | SLC44A5  | -1.2 | 0.0950277 | 0.2059927 | 3.307   | 0.397  | 2.909   | 3.703   | 3.919   | 0.580  | 3.378   | 4.531   |
| 14188 | ENSG00000022567 | SLC45A4  | 1.2  | 0.0013058 | 0.0072505 | 8.059   | 0.265  | 7.770   | 8.290   | 7.023   | 0.462  | 6.514   | 7.415   |
| 14189 | ENSG00000076351 | SLC46A1  | 1.4  | 7.654E-06 | 0.0001061 | 4.530   | 0.291  | 4.201   | 4.752   | 3.199   | 0.491  | 2.893   | 3.765   |
| 14190 | ENSG00000139508 | SLC46A3  | 2    | 0.0008471 | 0.0051132 | 1.112   | 0.286  | 0.783   | 1.302   | 0.563   | 0.025  | 0.535   | 0.580   |
| 14191 | ENSG00000211584 | SLC48A1  | 1.3  | 0.0001817 | 0.0014781 | 9.563   | 0.298  | 9.337   | 9.900   | 7.541   | 0.878  | 6.817   | 8.518   |
| 14192 | ENSG00000033867 | SLC4A7   | 1.2  | 5.147E-07 | 1.109E-05 | 57.111  | 1.975  | 55.358  | 59.251  | 48.682  | 2.940  | 46.157  | 51.909  |
| 14193 | ENSG00000169241 | SLC50A1  | 1.1  | 0.0356038 | 0.0980743 | 36.673  | 2.512  | 33.946  | 38.892  | 34.080  | 0.792  | 33.306  | 34.889  |
| 14194 | ENSG00000198743 | SLC5A3   | 1.1  | 0.0079708 | 0.0305102 | 25.540  | 2.255  | 24.003  | 28.129  | 23.454  | 1.412  | 21.881  | 24.609  |
| 14195 | ENSG00000072041 | SLC6A15  | 1.2  | 0.0004375 | 0.0029988 | 10.988  | 0.594  | 10.307  | 11.402  | 9.473   | 0.335  | 9.091   | 9.712   |
| 14196 | ENSG00000063127 | SLC6A16  | 1.3  | 0.0572669 | 0.1406556 | 1.853   | 0.539  | 1.231   | 2.176   | 1.402   | 0.114  | 1.295   | 1.521   |
| 14198 | ENSG00000131389 | SLC6A6   | -1.2 | 5.802E-07 | 1.221E-05 | 74.120  | 4.586  | 70.070  | 79.099  | 89.740  | 3.007  | 86.493  | 92.430  |
| 14199 | ENSG00000130821 | SLC6A8   | -1.2 | 0.0033014 | 0.0152103 | 39.119  | 1.695  | 37.225  | 40.493  | 46.607  | 6.071  | 39.610  | 50.476  |
| 14200 | ENSG00000196517 | SLC6A9   | 1.4  | 6.771E-05 | 0.0006573 | 7.169   | 0.599  | 6.496   | 7.646   | 5.289   | 0.673  | 4.626   | 5.972   |
| 14201 | ENSG00000139514 | SLC7A1   | 1.6  | 2.53E-18  | 1.12E-15  | 62.832  | 3.347  | 59.023  | 65.304  | 39.366  | 1.648  | 37.838  | 41.113  |
| 14202 | ENSG00000151012 | SLC7A11  | 4.2  | 2.89E-24  | 6.98E-21  | 34.250  | 2.750  | 31.743  | 37.192  | 8.376   | 0.755  | 7.552   | 9.032   |
| 14203 | ENSG00000013293 | SLC7A14  | 2.1  | 1.368E-06 | 2.474E-05 | 0.954   | 0.081  | 0.862   | 1.016   | 0.463   | 0.109  | 0.342   | 0.553   |
| 14204 | ENSG00000003989 | SLC7A2   | 1.1  | 0.0027903 | 0.0133084 | 24.180  | 1.029  | 22.992  | 24.803  | 21.952  | 1.610  | 20.157  | 23.265  |
| 14205 | ENSG00000165349 | SLC7A3   | 1.1  | 0.0064565 | 0.02578   | 237.651 | 16.924 | 219.609 | 253.176 | 223.279 | 5.948  | 219.682 | 230.145 |
| 14206 | ENSG00000103257 | SLC7A5   | 2    | 5.785E-09 | 2.329E-07 | 145.464 | 7.345  | 136.982 | 149.717 | 74.104  | 10.743 | 65.900  | 86.264  |
| 14207 | ENSG00000103061 | SLC7A6OS | 1.1  | 0.0584532 | 0.1427662 | 17.421  | 0.109  | 17.295  | 17.489  | 16.412  | 0.823  | 15.792  | 17.346  |
| 14208 | ENSG00000092068 | SLC7A8   | 1.3  | 8.43E-12  | 7.348E-10 | 94.676  | 3.173  | 91.234  | 97.483  | 73.163  | 3.762  | 69.557  | 77.064  |
| 14209 | ENSG00000090020 | SLC9A1   | -1.2 | 0.0044145 | 0.0192032 | 7.877   | 0.397  | 7.419   | 8.130   | 9.500   | 0.728  | 8.735   | 10.184  |
| 14212 | ENSG00000109062 | SLC9A3R1 | -1.1 | 0.0288599 | 0.0837521 | 66.675  | 3.368  | 62.821  | 69.052  | 74.665  | 7.272  | 69.855  | 83.030  |
| 14213 | ENSG00000135740 | SLC9A5   | -1.3 | 0.0019686 | 0.0100469 | 4.528   | 0.262  | 4.250   | 4.771   | 5.880   | 0.403  | 5.531   | 6.321   |
| 14214 | ENSG00000198689 | SLC9A6   | 1.1  | 0.0118185 | 0.0416865 | 9.191   | 0.435  | 8.693   | 9.500   | 8.198   | 0.637  | 7.544   | 8.816   |
| 14215 | ENSG00000065923 | SLC9A7   | -1.1 | 0.0093274 | 0.0344067 | 9.711   | 0.341  | 9.355   | 10.036  | 11.057  | 0.644  | 10.340  | 11.587  |
| 14217 | ENSG00000197818 | SLC9A8   | 1.2  | 0.0012101 | 0.006854  | 5.786   | 0.168  | 5.620   | 5.956   | 4.784   | 0.439  | 4.277   | 5.044   |
| 14218 | ENSG00000164038 | SLC9B2   | 1.4  | 9.374E-05 | 0.0008584 | 5.576   | 0.384  | 5.157   | 5.911   | 4.209   | 0.375  | 3.901   | 4.627   |
| 14219 | ENSG00000174640 | SLC02A1  | 1.5  | 0.0156669 | 0.0522219 | 1.272   | 0.219  | 1.035   | 1.466   | 0.880   | 0.200  | 0.663   | 1.058   |
| 14220 | ENSG00000173930 | SLC04C1  | 1.6  | 8.316E-09 | 3.161E-07 | 7.964   | 0.235  | 7.709   | 8.171   | 5.075   | 0.470  | 4.615   | 5.554   |
| 14221 | ENSG00000137571 | SLC05A1  | -1.2 | 0.0512217 | 0.1293389 | 1.625   | 0.132  | 1.521   | 1.774   | 1.950   | 0.141  | 1.787   | 2.035   |
| 14222 | ENSG00000119906 | SLF2     | 1.3  | 3.087E-08 | 9.819E-07 | 13.464  | 0.187  | 13.282  | 13.656  | 10.522  | 0.465  | 10.054  | 10.984  |
| 14223 | ENSG00000172716 | SLFN11   | 1.4  | 0.0326746 | 0.0922118 | 1.075   | 0.233  | 0.809   | 1.243   | 0.780   | 0.073  | 0.725   | 0.863   |
| 14225 | ENSG00000172123 | SLFN12   | 1.8  | 5.031E-10 | 2.651E-08 | 10.883  | 1.437  | 9.374   | 12.235  | 6.207   | 0.659  | 5.584   | 6.897   |
| 14226 | ENSG00000154760 | SLFN13   | 1.4  | 2.337E-09 | 1.046E-07 | 17.022  | 0.839  | 16.333  | 17.956  | 12.235  | 1.035  | 11.045  | 12.934  |
| 14227 | ENSG00000119705 | SLIRP    | -1.1 | 0.0102609 | 0.037233  | 74.095  | 1.544  | 72.522  | 75.609  | 82.528  | 1.558  | 80.748  | 83.639  |

|       | A               | B            | C    | D         | E         | F       | G     | H       | I       | J       | K     | L       | M       |
|-------|-----------------|--------------|------|-----------|-----------|---------|-------|---------|---------|---------|-------|---------|---------|
| 14228 | ENSG00000187122 | SLIT1        | -1.6 | 0.0003077 | 0.0022565 | 0.618   | 0.074 | 0.551   | 0.698   | 1.036   | 0.143 | 0.887   | 1.173   |
| 14229 | ENSG00000178235 | SLITRK1      | -2.3 | 5.265E-05 | 0.0005339 | 0.486   | 0.201 | 0.256   | 0.632   | 1.148   | 0.072 | 1.077   | 1.222   |
| 14230 | ENSG00000121871 | SLITRK3      | -1.2 | 0.1172788 | 0.2389803 | 2.463   | 0.227 | 2.233   | 2.688   | 2.926   | 0.257 | 2.661   | 3.175   |
| 14231 | ENSG00000165300 | SLITRK5      | -1.1 | 0.0356273 | 0.0981055 | 1.794   | 0.133 | 1.666   | 1.931   | 2.095   | 0.183 | 1.891   | 2.246   |
| 14232 | ENSG00000065613 | SLK          | 1.2  | 5.628E-08 | 1.653E-06 | 38.594  | 0.563 | 37.994  | 39.112  | 31.750  | 1.832 | 29.662  | 33.089  |
| 14233 | ENSG00000163681 | SLMAP        | 1.1  | 0.0016752 | 0.0088708 | 15.510  | 0.084 | 15.456  | 15.607  | 14.185  | 1.014 | 13.377  | 15.323  |
| 14234 | ENSG00000137776 | SLTM         | -1.2 | 1.888E-05 | 0.0002261 | 55.074  | 5.132 | 50.630  | 60.691  | 70.074  | 4.822 | 65.551  | 75.147  |
| 14236 | ENSG00000164609 | SLU7         | 1.1  | 0.002103  | 0.0105576 | 22.755  | 0.766 | 21.920  | 23.424  | 20.383  | 0.814 | 19.506  | 21.116  |
| 14237 | ENSG00000149346 | SLX4IP       | -1.1 | 0.1006365 | 0.2140218 | 4.167   | 0.117 | 4.085   | 4.301   | 4.753   | 0.348 | 4.378   | 5.064   |
| 14239 | ENSG00000170365 | SMAD1        | 1.2  | 0.0005504 | 0.0036167 | 9.039   | 0.174 | 8.871   | 9.218   | 7.603   | 0.479 | 7.273   | 8.152   |
| 14240 | ENSG00000141646 | SMAD4        | -1.1 | 0.0003191 | 0.0023205 | 20.500  | 0.276 | 20.186  | 20.702  | 23.984  | 0.274 | 23.668  | 24.163  |
| 14241 | ENSG00000113658 | SMAD5        | -1.1 | 0.0034753 | 0.0158432 | 39.953  | 0.743 | 39.312  | 40.767  | 44.605  | 2.155 | 42.120  | 45.947  |
| 14243 | ENSG00000120693 | SMAD9        | 1.6  | 0.002683  | 0.012905  | 0.975   | 0.051 | 0.937   | 1.033   | 0.599   | 0.171 | 0.408   | 0.738   |
| 14244 | ENSG00000170545 | SMAGP        | 1.3  | 0.0057425 | 0.0235851 | 4.925   | 0.284 | 4.606   | 5.149   | 3.883   | 0.640 | 3.361   | 4.597   |
| 14246 | ENSG00000084070 | SMAP2        | 1.4  | 0.0017669 | 0.0092288 | 4.379   | 0.143 | 4.229   | 4.513   | 3.228   | 0.551 | 2.800   | 3.849   |
| 14247 | ENSG00000102038 | SMARCA1      | 1.1  | 0.0011166 | 0.0064364 | 141.304 | 6.249 | 136.453 | 148.355 | 131.319 | 3.793 | 127.650 | 135.224 |
| 14248 | ENSG00000080503 | SMARCA2      | -1.6 | 1.63E-08  | 5.683E-07 | 1.758   | 0.228 | 1.540   | 1.995   | 2.850   | 0.256 | 2.565   | 3.060   |
| 14249 | ENSG00000127616 | SMARCA4      | -1.1 | 0.0045859 | 0.0197759 | 63.856  | 1.502 | 62.636  | 65.534  | 70.985  | 1.937 | 69.336  | 73.119  |
| 14250 | ENSG00000153147 | SMARCA5      | -1.1 | 0.0022222 | 0.0110155 | 137.601 | 3.144 | 134.326 | 140.596 | 151.886 | 2.724 | 148.752 | 153.681 |
| 14251 | ENSG00000163104 | SMARCA5<br>1 | 1.1  | 6.128E-05 | 0.0006054 | 49.689  | 1.798 | 48.143  | 51.663  | 44.382  | 0.596 | 43.739  | 44.915  |
| 14252 | ENSG00000099956 | SMARCB1      | -1.1 | 0.0841598 | 0.1886041 | 104.592 | 6.098 | 97.656  | 109.112 | 113.218 | 3.388 | 109.307 | 115.238 |
| 14253 | ENSG00000139613 | SMARCC2      | -1.1 | 0.000532  | 0.0035204 | 25.072  | 1.125 | 23.816  | 25.990  | 28.995  | 0.945 | 28.208  | 30.043  |
| 14254 | ENSG00000073584 | SMARCE1      | -1   | 0.1204093 | 0.2435289 | 20.888  | 0.116 | 20.763  | 20.992  | 22.376  | 0.280 | 22.209  | 22.699  |
| 14255 | ENSG00000072501 | SMC1A        | 1.1  | 0.0117977 | 0.0416651 | 59.879  | 1.001 | 59.299  | 61.035  | 57.144  | 2.611 | 54.377  | 59.563  |
| 14257 | ENSG00000136824 | SMC2         | 1.1  | 0.0192465 | 0.0611069 | 32.532  | 1.005 | 31.764  | 33.670  | 30.646  | 0.203 | 30.498  | 30.877  |
| 14258 | ENSG00000270332 | SMC2-AS1     | -1.4 | 0.1180646 | 0.2400898 | 0.343   | 0.106 | 0.274   | 0.465   | 0.481   | 0.046 | 0.448   | 0.534   |
| 14259 | ENSG00000108055 | SMC3         | -1.1 | 0.0705423 | 0.1647447 | 124.474 | 4.603 | 120.843 | 129.651 | 134.461 | 4.238 | 129.779 | 138.038 |
| 14261 | ENSG00000113810 | SMC4         | -1.1 | 0.0011747 | 0.0066923 | 86.436  | 3.886 | 83.204  | 90.748  | 99.070  | 5.373 | 95.288  | 105.219 |
| 14263 | ENSG00000183172 | SMDT1        | 1.1  | 0.1063335 | 0.2228292 | 16.773  | 1.697 | 14.927  | 18.265  | 15.326  | 0.670 | 14.558  | 15.790  |
| 14264 | ENSG00000157106 | SMG1         | -1.1 | 0.0720693 | 0.1675245 | 23.865  | 0.674 | 23.152  | 24.492  | 25.671  | 0.388 | 25.226  | 25.935  |
| 14267 | ENSG00000261556 | SMG1P7       | -1.3 | 0.0003276 | 0.0023688 | 6.944   | 0.130 | 6.850   | 7.092   | 9.079   | 1.021 | 7.961   | 9.963   |
| 14268 | ENSG00000198952 | SMG5         | -1.1 | 0.0106846 | 0.0384404 | 72.303  | 0.607 | 71.707  | 72.920  | 80.129  | 5.241 | 74.107  | 83.655  |
| 14269 | ENSG00000070366 | SMG6         | 1.2  | 0.0005434 | 0.0035805 | 12.701  | 0.598 | 12.157  | 13.341  | 11.152  | 0.450 | 10.658  | 11.536  |
| 14270 | ENSG00000116698 | SMG7         | -1.1 | 0.0326465 | 0.0921633 | 34.696  | 1.797 | 32.628  | 35.880  | 38.086  | 0.913 | 37.084  | 38.869  |
| 14272 | ENSG00000167447 | SMG8         | -1.1 | 0.0929818 | 0.2026025 | 16.635  | 0.683 | 15.947  | 17.313  | 18.425  | 0.542 | 17.799  | 18.750  |
| 14273 | ENSG00000105771 | SMG9         | -1.1 | 0.1216152 | 0.2453923 | 7.580   | 0.180 | 7.394   | 7.753   | 8.356   | 0.474 | 8.021   | 8.898   |
| 14274 | ENSG00000256537 | SMIM10L1     | 1.2  | 0.0003016 | 0.0022186 | 15.931  | 0.474 | 15.457  | 16.405  | 13.621  | 0.466 | 13.085  | 13.928  |

|       | A               | B             | C    | D         | E         | F       | G      | H       | I       | J       | K     | L       | M       |
|-------|-----------------|---------------|------|-----------|-----------|---------|--------|---------|---------|---------|-------|---------|---------|
| 14275 | ENSG00000178947 | SMIM10L2<br>A | 1.4  | 5.821E-06 | 8.457E-05 | 16.946  | 2.364  | 14.228  | 18.531  | 12.271  | 1.124 | 11.041  | 13.244  |
| 14276 | ENSG00000196972 | SMIM10L2<br>B | 1.4  | 0.0076278 | 0.0294809 | 6.902   | 0.645  | 6.316   | 7.594   | 5.176   | 1.028 | 4.085   | 6.128   |
| 14277 | ENSG00000188725 | SMIM15        | 1.1  | 0.0199574 | 0.0629171 | 49.876  | 2.368  | 47.559  | 52.292  | 46.529  | 1.925 | 44.337  | 47.946  |
| 14278 | ENSG00000235453 | SMIM27        | -1.2 | 0.0738434 | 0.1705415 | 5.145   | 0.553  | 4.734   | 5.773   | 6.451   | 1.252 | 5.015   | 7.314   |
| 14279 | ENSG00000186577 | SMIM29        | 1.2  | 0.0201831 | 0.0635202 | 8.772   | 0.140  | 8.616   | 8.890   | 7.324   | 1.162 | 6.061   | 8.350   |
| 14280 | ENSG00000214046 | SMIM7         | 1.1  | 0.0369084 | 0.1006502 | 11.385  | 0.684  | 10.595  | 11.780  | 10.507  | 0.381 | 10.080  | 10.812  |
| 14281 | ENSG00000172062 | SMN1          | -1.1 | 0.0083724 | 0.0316616 | 31.365  | 1.402  | 30.344  | 32.964  | 35.922  | 1.109 | 34.643  | 36.616  |
| 14282 | ENSG00000205571 | SMN2          | -1.2 | 0.002085  | 0.0104889 | 23.780  | 1.252  | 22.950  | 25.220  | 28.332  | 1.228 | 27.062  | 29.514  |
| 14283 | ENSG00000119953 | SMNDC1        | 1.1  | 0.0641608 | 0.1532916 | 32.848  | 0.474  | 32.481  | 33.383  | 31.359  | 0.855 | 30.373  | 31.908  |
| 14285 | ENSG00000112562 | SMOC2         | -2.1 | 1.667E-09 | 7.766E-08 | 3.187   | 0.866  | 2.563   | 4.175   | 6.812   | 0.141 | 6.663   | 6.943   |
| 14286 | ENSG00000136699 | SMPD4         | -1.1 | 0.0072103 | 0.0281601 | 36.483  | 0.112  | 36.356  | 36.569  | 41.043  | 3.521 | 38.107  | 44.947  |
| 14289 | ENSG00000204791 | SMPD5         | 1.5  | 0.0038508 | 0.0172024 | 4.791   | 0.187  | 4.603   | 4.977   | 3.337   | 0.600 | 2.770   | 3.966   |
| 14290 | ENSG00000130768 | SMPDL3B       | 1.1  | 0.0463204 | 0.1197892 | 34.119  | 2.420  | 31.630  | 36.465  | 31.766  | 2.558 | 28.815  | 33.330  |
| 14291 | ENSG00000102172 | SMS           | 1.1  | 0.000316  | 0.0023057 | 326.497 | 21.248 | 305.454 | 347.945 | 298.675 | 8.262 | 290.466 | 306.989 |
| 14292 | ENSG00000183963 | SMTN          | -1.2 | 0.0212482 | 0.0661458 | 4.561   | 0.302  | 4.270   | 4.873   | 5.413   | 0.480 | 4.867   | 5.768   |
| 14293 | ENSG00000188176 | SMTNL2        | -1.6 | 0.0006959 | 0.0043517 | 2.660   | 0.439  | 2.273   | 3.137   | 4.243   | 0.579 | 3.581   | 4.653   |
| 14294 | ENSG00000122692 | SMU1          | -1.1 | 0.0054932 | 0.0227268 | 34.620  | 0.568  | 34.244  | 35.273  | 38.903  | 0.237 | 38.640  | 39.100  |
| 14295 | ENSG00000108854 | SMURF2        | 1.1  | 0.0020961 | 0.0105351 | 17.841  | 0.240  | 17.593  | 18.072  | 16.122  | 0.848 | 15.215  | 16.896  |
| 14296 | ENSG00000143499 | SMYD2         | 1.4  | 0.0014877 | 0.0080361 | 2.756   | 0.223  | 2.499   | 2.899   | 2.045   | 0.092 | 1.983   | 2.151   |
| 14297 | ENSG00000185669 | SNAI3         | -1.2 | 0.0486986 | 0.1245108 | 10.319  | 1.831  | 8.530   | 12.190  | 12.562  | 0.635 | 12.044  | 13.270  |
| 14298 | ENSG00000260630 | SNAI3-<br>AS1 | 1.4  | 0.0520268 | 0.1309417 | 0.990   | 0.152  | 0.821   | 1.115   | 0.729   | 0.237 | 0.466   | 0.925   |
| 14299 | ENSG00000099940 | SNAP29        | 1.1  | 0.0533736 | 0.1335366 | 8.413   | 1.290  | 7.273   | 9.814   | 7.529   | 0.620 | 6.884   | 8.121   |
| 14300 | ENSG00000023608 | SNAPC1        | 1.2  | 0.0073697 | 0.028621  | 29.723  | 0.738  | 29.259  | 30.574  | 26.337  | 3.377 | 22.804  | 29.532  |
| 14301 | ENSG00000104976 | SNAPC2        | -1.2 | 0.0110581 | 0.039507  | 13.898  | 0.447  | 13.558  | 14.405  | 16.915  | 1.172 | 15.604  | 17.859  |
| 14302 | ENSG00000164975 | SNAPC3        | -1.1 | 0.0276456 | 0.0809505 | 29.151  | 1.423  | 27.517  | 30.119  | 32.481  | 2.701 | 29.845  | 35.243  |
| 14303 | ENSG00000165684 | SNAPC4        | -1.3 | 0.0002739 | 0.0020587 | 7.073   | 0.890  | 6.054   | 7.697   | 9.596   | 1.409 | 8.188   | 11.005  |
| 14304 | ENSG00000174446 | SNAPC5        | 1.1  | 0.0882661 | 0.1951941 | 21.098  | 1.545  | 19.314  | 22.030  | 19.600  | 0.212 | 19.356  | 19.745  |
| 14305 | ENSG00000145335 | SNCA          | 1.3  | 0.000665  | 0.0042027 | 9.054   | 0.674  | 8.276   | 9.459   | 7.259   | 0.882 | 6.332   | 8.086   |
| 14306 | ENSG00000173267 | SNCG          | -1.4 | 0.0004226 | 0.0029183 | 12.435  | 0.737  | 11.848  | 13.262  | 17.667  | 1.000 | 16.932  | 18.805  |
| 14307 | ENSG00000197157 | SND1          | -1.1 | 0.0027434 | 0.0131404 | 129.983 | 1.555  | 128.292 | 131.352 | 143.772 | 2.925 | 140.878 | 146.726 |
| 14308 | ENSG00000162804 | SNED1         | 1.4  | 0.0183086 | 0.0589032 | 0.614   | 0.107  | 0.511   | 0.723   | 0.453   | 0.045 | 0.414   | 0.503   |
| 14309 | ENSG00000255717 | SNHG1         | -1.1 | 0.0259753 | 0.0771549 | 192.085 | 6.034  | 187.032 | 198.766 | 208.933 | 1.027 | 208.253 | 210.114 |
| 14310 | ENSG00000247092 | SNHG10        | -1.3 | 0.0023828 | 0.0116949 | 11.372  | 0.546  | 11.030  | 12.001  | 14.693  | 1.018 | 13.733  | 15.761  |
| 14311 | ENSG00000197989 | SNHG12        | -1.4 | 2.921E-06 | 4.673E-05 | 11.006  | 2.312  | 9.318   | 13.641  | 16.279  | 1.300 | 14.946  | 17.544  |
| 14312 | ENSG00000224078 | SNHG14        | 1.2  | 2.262E-07 | 5.478E-06 | 70.031  | 4.766  | 64.551  | 73.207  | 60.711  | 0.824 | 59.771  | 61.308  |
| 14313 | ENSG00000232956 | SNHG15        | -1.2 | 1.483E-05 | 0.0001846 | 25.939  | 0.557  | 25.319  | 26.395  | 32.314  | 0.844 | 31.346  | 32.892  |
| 14314 | ENSG00000163597 | SNHG16        | -1.3 | 1.425E-08 | 5.064E-07 | 33.410  | 0.139  | 33.286  | 33.560  | 43.403  | 1.533 | 41.741  | 44.762  |
| 14315 | ENSG00000196756 | SNHG17        | -1.1 | 0.0597213 | 0.1451453 | 18.518  | 0.571  | 17.953  | 19.094  | 20.546  | 1.478 | 19.336  | 22.193  |

|       | A               | B          | C    | D         | E         | F       | G      | H       | I       | J       | K      | L       | M       |
|-------|-----------------|------------|------|-----------|-----------|---------|--------|---------|---------|---------|--------|---------|---------|
| 14316 | ENSG00000250786 | SNHG18     | -1.4 | 0.000204  | 0.0016189 | 8.604   | 0.160  | 8.476   | 8.784   | 12.487  | 1.152  | 11.544  | 13.771  |
| 14317 | ENSG00000260260 | SNHG19     | -1.3 | 0.0026113 | 0.0126258 | 84.884  | 1.171  | 83.641  | 85.966  | 109.126 | 8.122  | 103.533 | 118.443 |
| 14318 | ENSG00000250988 | SNHG21     | 1.3  | 0.0793465 | 0.1802293 | 4.923   | 1.195  | 3.788   | 6.169   | 3.723   | 0.609  | 3.328   | 4.424   |
| 14319 | ENSG00000266402 | SNHG25     | -1.9 | 0.0043062 | 0.0188241 | 5.687   | 1.140  | 4.780   | 6.967   | 10.903  | 0.437  | 10.614  | 11.406  |
| 14320 | ENSG00000228649 | SNHG26     | -1.4 | 0.0002602 | 0.0019735 | 5.479   | 0.566  | 4.890   | 6.018   | 7.895   | 1.070  | 6.668   | 8.631   |
| 14322 | ENSG00000242125 | SNHG3      | -1.1 | 0.0005146 | 0.0034359 | 76.803  | 4.961  | 73.363  | 82.490  | 87.946  | 1.546  | 86.999  | 89.730  |
| 14323 | ENSG00000281398 | SNHG4      | -1.2 | 0.0001439 | 0.001217  | 43.554  | 4.632  | 39.296  | 48.487  | 54.257  | 1.630  | 52.458  | 55.637  |
| 14324 | ENSG00000203875 | SNHG5      | -1.1 | 0.0143283 | 0.0487202 | 198.550 | 5.545  | 194.203 | 204.795 | 217.041 | 1.389  | 215.448 | 218.001 |
| 14325 | ENSG00000233016 | SNHG7      | -1.1 | 0.0683286 | 0.1608633 | 13.680  | 2.305  | 11.452  | 16.056  | 15.582  | 0.839  | 14.654  | 16.288  |
| 14326 | ENSG00000184602 | SNN        | -1.2 | 0.000145  | 0.0012246 | 62.325  | 1.627  | 61.222  | 64.193  | 73.452  | 4.274  | 70.040  | 78.247  |
| 14327 | ENSG00000200087 | SNORA73B   | -1.4 | 0.0960233 | 0.2073259 | 12.591  | 1.888  | 10.863  | 14.606  | 18.043  | 3.043  | 15.225  | 21.270  |
| 14328 | ENSG00000207063 | SNORD116-1 | 1.3  | 0.1023491 | 0.2166495 | 50.602  | 5.179  | 46.625  | 56.458  | 39.676  | 1.119  | 38.647  | 40.868  |
| 14329 | ENSG00000207001 | SNORD116-2 | 2    | 0.0020012 | 0.0101823 | 41.645  | 6.188  | 34.502  | 45.364  | 20.890  | 5.268  | 15.530  | 26.061  |
| 14330 | ENSG00000201785 | SNORD117   | -1.4 | 0.1110705 | 0.2300153 | 36.378  | 4.012  | 33.026  | 40.823  | 50.728  | 15.920 | 36.781  | 68.072  |
| 14331 | ENSG00000263934 | SNORD3A    | -1.5 | 0.0827077 | 0.1861639 | 2.639   | 0.384  | 2.304   | 3.059   | 3.957   | 0.533  | 3.588   | 4.567   |
| 14332 | ENSG00000144028 | SNRNP200   | -1.1 | 5.366E-05 | 0.0005421 | 120.188 | 3.245  | 116.443 | 122.136 | 136.784 | 3.587  | 132.642 | 138.875 |
| 14333 | ENSG00000060688 | SNRNP40    | -1.1 | 0.0010369 | 0.0060516 | 56.083  | 1.124  | 55.276  | 57.368  | 64.008  | 2.327  | 62.624  | 66.695  |
| 14334 | ENSG00000168566 | SNRNP48    | -1.2 | 3.446E-06 | 5.386E-05 | 19.443  | 0.413  | 19.012  | 19.836  | 24.855  | 1.832  | 22.965  | 26.623  |
| 14335 | ENSG00000125835 | SNRPB      | -1.1 | 0.0002985 | 0.0022021 | 445.927 | 9.903  | 434.501 | 452.026 | 507.373 | 22.260 | 482.182 | 524.389 |
| 14336 | ENSG00000125743 | SNRPD2     | -1.1 | 0.0740418 | 0.1708416 | 332.593 | 9.545  | 323.502 | 342.536 | 357.108 | 5.044  | 352.189 | 362.269 |
| 14337 | ENSG00000100028 | SNRPD3     | -1   | 0.0954731 | 0.2065938 | 143.205 | 2.350  | 141.606 | 145.904 | 153.581 | 5.506  | 149.391 | 159.817 |
| 14338 | ENSG00000182004 | SNRPE      | -1.1 | 0.0049687 | 0.021042  | 119.311 | 6.804  | 113.929 | 126.959 | 136.056 | 4.637  | 130.703 | 138.846 |
| 14339 | ENSG00000256968 | SNRPEP2    | -1.2 | 0.0025727 | 0.0124519 | 260.594 | 7.326  | 252.148 | 265.215 | 306.336 | 15.244 | 296.166 | 323.863 |
| 14341 | ENSG00000233270 | SNRPEP4    | -1.1 | 0.0213087 | 0.0662731 | 280.482 | 32.089 | 248.485 | 312.663 | 324.066 | 26.285 | 294.484 | 344.737 |
| 14342 | ENSG00000172164 | SNTB1      | 1.3  | 6.261E-07 | 1.299E-05 | 10.375  | 0.649  | 9.738   | 11.036  | 7.895   | 0.231  | 7.696   | 8.148   |
| 14343 | ENSG00000168807 | SNTB2      | -1.1 | 0.0963108 | 0.2077407 | 12.306  | 0.447  | 11.916  | 12.794  | 13.377  | 0.235  | 13.179  | 13.636  |
| 14344 | ENSG00000172554 | SNTG2      | -1.2 | 0.0839636 | 0.188364  | 3.324   | 0.573  | 2.867   | 3.967   | 4.028   | 0.094  | 3.958   | 4.135   |
| 14345 | ENSG00000169371 | SNUPN      | 1.2  | 0.0027019 | 0.0129783 | 12.133  | 0.191  | 11.975  | 12.346  | 10.313  | 0.469  | 10.015  | 10.854  |
| 14346 | ENSG00000273173 | SNURF      | -1.4 | 0.0092165 | 0.0340494 | 4.835   | 0.969  | 3.898   | 5.833   | 7.092   | 0.429  | 6.818   | 7.587   |
| 14347 | ENSG00000100603 | SNW1       | -1.1 | 0.0373865 | 0.1015687 | 94.261  | 3.478  | 90.606  | 97.529  | 102.934 | 2.255  | 100.354 | 104.523 |
| 14348 | ENSG0000028528  | SNX1       | 1.2  | 2.866E-05 | 0.0003214 | 28.039  | 1.491  | 26.353  | 29.180  | 24.409  | 0.892  | 23.873  | 25.439  |
| 14349 | ENSG00000002919 | SNX11      | 1.2  | 0.0012807 | 0.0071558 | 14.048  | 0.109  | 13.962  | 14.171  | 11.974  | 0.383  | 11.671  | 12.404  |
| 14350 | ENSG00000135317 | SNX14      | 1.1  | 0.0898307 | 0.1978779 | 13.455  | 0.398  | 13.142  | 13.902  | 12.720  | 0.818  | 11.777  | 13.236  |
| 14351 | ENSG00000115234 | SNX17      | -1.1 | 0.0225994 | 0.0693566 | 41.889  | 1.118  | 40.823  | 43.053  | 46.562  | 1.323  | 45.249  | 47.896  |

|       | A               | B         | C    | D         | E         | F       | G      | H       | I       | J       | K     | L       | M       |
|-------|-----------------|-----------|------|-----------|-----------|---------|--------|---------|---------|---------|-------|---------|---------|
| 14352 | ENSG00000178996 | SNX18     | 1.1  | 0.0137501 | 0.0470856 | 12.462  | 0.748  | 11.689  | 13.182  | 11.336  | 0.810 | 10.411  | 11.915  |
| 14353 | ENSG00000225345 | SNX18P3   | -1.5 | 0.0135614 | 0.046562  | 2.290   | 0.475  | 1.741   | 2.572   | 3.551   | 0.369 | 3.125   | 3.766   |
| 14354 | ENSG00000124104 | SNX21     | -1.3 | 0.0001524 | 0.0012738 | 8.256   | 1.293  | 7.194   | 9.695   | 11.142  | 0.574 | 10.578  | 11.726  |
| 14355 | ENSG00000064652 | SNX24     | 1.1  | 0.0543552 | 0.1353916 | 13.740  | 0.896  | 13.184  | 14.774  | 12.594  | 0.371 | 12.380  | 13.022  |
| 14356 | ENSG00000112335 | SNX3      | 1.1  | 0.0257905 | 0.0767678 | 125.408 | 3.517  | 121.474 | 128.250 | 119.123 | 3.572 | 116.264 | 123.127 |
| 14358 | ENSG00000148158 | SNX30     | 1.2  | 8.052E-05 | 0.0007566 | 18.434  | 0.539  | 17.874  | 18.949  | 16.214  | 1.087 | 15.010  | 17.124  |
| 14359 | ENSG00000173548 | SNX33     | -1.1 | 0.0777543 | 0.177399  | 13.275  | 0.357  | 12.906  | 13.619  | 14.644  | 1.541 | 13.233  | 16.288  |
| 14360 | ENSG00000114520 | SNX4      | 1.1  | 0.0091329 | 0.0338267 | 49.569  | 1.989  | 47.682  | 51.646  | 45.394  | 1.544 | 43.626  | 46.475  |
| 14361 | ENSG00000162627 | SNX7      | 1.2  | 0.0022315 | 0.0110516 | 35.610  | 0.395  | 35.318  | 36.059  | 31.231  | 2.044 | 29.490  | 33.482  |
| 14362 | ENSG00000106266 | SNX8      | 1.1  | 0.0016293 | 0.0086685 | 19.142  | 0.699  | 18.336  | 19.577  | 17.048  | 0.621 | 16.363  | 17.576  |
| 14363 | ENSG00000130340 | SNX9      | 1.4  | 4.36E-11  | 3.113E-09 | 36.769  | 0.787  | 36.075  | 37.624  | 27.064  | 0.365 | 26.646  | 27.317  |
| 14364 | ENSG00000057252 | SOAT1     | 1.3  | 0.0051521 | 0.0216223 | 2.277   | 0.055  | 2.215   | 2.318   | 1.754   | 0.248 | 1.525   | 2.017   |
| 14365 | ENSG00000120833 | SOCS2     | 1.3  | 1.436E-05 | 0.0001804 | 9.427   | 0.799  | 8.961   | 10.350  | 7.502   | 0.124 | 7.386   | 7.632   |
| 14366 | ENSG00000246985 | SOCS2-AS1 | 1.4  | 0.0110233 | 0.0394244 | 2.407   | 0.173  | 2.207   | 2.515   | 1.772   | 0.365 | 1.356   | 2.035   |
| 14367 | ENSG00000184557 | SOCS3     | 1.6  | 1.928E-10 | 1.173E-08 | 24.774  | 1.463  | 23.868  | 26.462  | 15.861  | 1.635 | 14.712  | 17.734  |
| 14368 | ENSG00000171150 | SOCS5     | -1.1 | 0.0028369 | 0.0134517 | 16.259  | 0.884  | 15.375  | 17.143  | 19.032  | 0.771 | 18.202  | 19.725  |
| 14369 | ENSG00000274211 | SOCS7     | -1.1 | 0.0480322 | 0.1231608 | 17.912  | 1.010  | 17.299  | 19.079  | 19.815  | 1.747 | 17.888  | 21.294  |
| 14370 | ENSG00000109610 | SOD3      | -1.4 | 0.0343938 | 0.0956905 | 2.879   | 0.716  | 2.220   | 3.641   | 4.132   | 1.526 | 3.065   | 5.880   |
| 14371 | ENSG00000149639 | SOGA1     | -1.1 | 0.0008472 | 0.0051132 | 11.593  | 0.542  | 10.977  | 11.995  | 13.521  | 0.932 | 12.488  | 14.298  |
| 14372 | ENSG00000120669 | SOHLH2    | 1.4  | 0.0098929 | 0.0361378 | 4.501   | 0.640  | 3.770   | 4.955   | 3.374   | 0.074 | 3.290   | 3.427   |
| 14373 | ENSG00000159140 | SON       | -1.1 | 0.0386108 | 0.1040676 | 87.681  | 3.957  | 84.409  | 92.079  | 94.548  | 3.206 | 91.749  | 98.046  |
| 14374 | ENSG00000095637 | SORBS1    | -1.1 | 0.0003057 | 0.0022433 | 13.157  | 0.240  | 12.891  | 13.358  | 15.408  | 0.341 | 15.015  | 15.626  |
| 14375 | ENSG00000154556 | SORBS2    | -1.2 | 0.0703174 | 0.1644012 | 1.068   | 0.269  | 0.891   | 1.377   | 1.283   | 0.136 | 1.127   | 1.377   |
| 14376 | ENSG00000184985 | SORCS2    | -1.4 | 0.062229  | 0.149755  | 0.539   | 0.068  | 0.472   | 0.608   | 0.755   | 0.134 | 0.668   | 0.910   |
| 14377 | ENSG00000140263 | SORD      | -1.1 | 0.0003038 | 0.0022324 | 25.995  | 0.555  | 25.511  | 26.601  | 30.146  | 0.370 | 29.837  | 30.556  |
| 14378 | ENSG00000259479 | SORD2P    | -1.1 | 0.0291691 | 0.0844466 | 13.456  | 0.867  | 12.956  | 14.457  | 15.541  | 0.370 | 15.132  | 15.852  |
| 14379 | ENSG00000229692 | SOS1-IT1  | 1.4  | 0.0007397 | 0.0045678 | 10.826  | 0.326  | 10.455  | 11.067  | 7.642   | 0.975 | 6.521   | 8.297   |
| 14380 | ENSG00000100485 | SOS2      | 1.3  | 1.031E-05 | 0.0001367 | 10.368  | 0.188  | 10.157  | 10.519  | 8.286   | 0.295 | 7.957   | 8.528   |
| 14381 | ENSG00000198142 | SOWAHC    | 1.3  | 1.31E-06  | 2.385E-05 | 17.865  | 0.163  | 17.722  | 18.043  | 14.322  | 0.536 | 13.706  | 14.676  |
| 14382 | ENSG00000100146 | SOX10     | -1.2 | 0.0566382 | 0.1395125 | 2.502   | 0.182  | 2.308   | 2.668   | 3.170   | 0.618 | 2.744   | 3.878   |
| 14383 | ENSG00000176887 | SOX11     | -1.1 | 0.0050237 | 0.0212202 | 44.037  | 1.944  | 41.792  | 45.179  | 48.916  | 1.012 | 47.775  | 49.705  |
| 14384 | ENSG00000168875 | SOX14     | 3.4  | 0.011824  | 0.041697  | 0.456   | 0.109  | 0.362   | 0.575   | 0.132   | 0.097 | 0.076   | 0.244   |
| 14385 | ENSG00000181449 | SOX2      | -1.2 | 2.063E-07 | 5.086E-06 | 315.969 | 10.843 | 308.997 | 328.461 | 385.110 | 8.768 | 375.003 | 390.687 |
| 14386 | ENSG00000242808 | SOX2-OT   | 1.4  | 0.010505  | 0.0379417 | 0.815   | 0.137  | 0.684   | 0.958   | 0.606   | 0.090 | 0.510   | 0.689   |
| 14387 | ENSG00000125285 | SOX21     | -2.7 | 4.688E-10 | 2.493E-08 | 2.700   | 0.768  | 2.092   | 3.563   | 7.428   | 1.330 | 6.188   | 8.833   |
| 14388 | ENSG00000227640 | SOX21-AS1 | -2.1 | 7.494E-07 | 1.51E-05  | 2.104   | 0.348  | 1.707   | 2.357   | 4.554   | 0.272 | 4.377   | 4.866   |
| 14389 | ENSG00000124766 | SOX4      | 1.1  | 0.0382148 | 0.1031975 | 156.353 | 4.956  | 151.278 | 161.180 | 150.582 | 9.817 | 139.271 | 156.877 |
| 14390 | ENSG00000134532 | SOX5      | 1.6  | 0.0037135 | 0.0167038 | 0.656   | 0.087  | 0.565   | 0.738   | 0.411   | 0.119 | 0.319   | 0.546   |
| 14391 | ENSG00000005513 | SOX8      | 1.6  | 2.803E-06 | 4.515E-05 | 5.971   | 0.342  | 5.597   | 6.267   | 3.790   | 0.840 | 2.943   | 4.623   |
| 14392 | ENSG00000125398 | SOX9      | -1.4 | 8.618E-05 | 0.0008    | 6.841   | 0.806  | 6.003   | 7.610   | 9.561   | 0.616 | 9.076   | 10.254  |
| 14393 | ENSG00000185591 | SP1       | -1.1 | 0.0060725 | 0.0245996 | 49.454  | 1.243  | 48.186  | 50.669  | 54.646  | 0.688 | 53.908  | 55.271  |

|       | A               | B        | C     | D         | E         | F       | G     | H       | I       | J       | K     | L       | M       |
|-------|-----------------|----------|-------|-----------|-----------|---------|-------|---------|---------|---------|-------|---------|---------|
| 14394 | ENSG00000135899 | SP110    | 1.6   | 0.0001082 | 0.0009619 | 2.185   | 0.524 | 1.628   | 2.669   | 1.354   | 0.327 | 1.021   | 1.674   |
| 14395 | ENSG00000079263 | SP140    | 3.3   | 6.738E-05 | 0.0006549 | 0.583   | 0.157 | 0.427   | 0.741   | 0.180   | 0.054 | 0.125   | 0.232   |
| 14396 | ENSG00000185404 | SP140L   | 1.3   | 0.0908996 | 0.199868  | 0.858   | 0.223 | 0.601   | 1.006   | 0.658   | 0.037 | 0.623   | 0.696   |
| 14397 | ENSG00000167182 | SP2      | -1.2  | 0.0060423 | 0.0245009 | 7.849   | 0.176 | 7.715   | 8.048   | 9.650   | 0.965 | 8.892   | 10.737  |
| 14398 | ENSG00000172845 | SP3      | -1.1  | 0.0302663 | 0.0868794 | 31.890  | 0.504 | 31.428  | 32.428  | 35.142  | 1.375 | 34.182  | 36.717  |
| 14399 | ENSG00000204335 | SP5      | -17.6 | 0.0085432 | 0.0321015 | 0.000   | 0.000 | 0.000   | 0.000   | 0.151   | 0.151 | 0.000   | 0.302   |
| 14400 | ENSG00000164651 | SP8      | 1.2   | 0.0008609 | 0.0051782 | 14.610  | 0.851 | 13.700  | 15.387  | 12.191  | 0.492 | 11.654  | 12.620  |
| 14402 | ENSG00000104450 | SPAG1    | 1.5   | 0.0003916 | 0.0027482 | 2.949   | 0.587 | 2.543   | 3.622   | 1.954   | 0.441 | 1.475   | 2.344   |
| 14403 | ENSG00000144451 | SPAG16   | 1.2   | 0.0008489 | 0.0051185 | 7.523   | 0.233 | 7.318   | 7.777   | 6.331   | 0.614 | 5.682   | 6.903   |
| 14404 | ENSG00000155761 | SPAG17   | -1.4  | 0.0999568 | 0.2132135 | 0.243   | 0.017 | 0.232   | 0.263   | 0.360   | 0.146 | 0.246   | 0.524   |
| 14405 | ENSG00000076382 | SPAG5    | -1.2  | 1.1E-05   | 0.0001447 | 81.797  | 1.565 | 80.101  | 83.185  | 96.439  | 4.673 | 91.358  | 100.553 |
| 14406 | ENSG00000091640 | SPAG7    | 1.1   | 0.0110903 | 0.0396053 | 68.376  | 2.280 | 65.836  | 70.243  | 63.827  | 1.565 | 62.040  | 64.950  |
| 14407 | ENSG00000008294 | SPAG9    | -1.1  | 0.0007944 | 0.0048432 | 32.634  | 1.700 | 31.446  | 34.582  | 37.315  | 2.108 | 34.882  | 38.600  |
| 14409 | ENSG00000113140 | SPARC    | 1.3   | 3.59E-12  | 3.389E-10 | 250.401 | 5.726 | 246.252 | 256.934 | 199.504 | 2.756 | 196.964 | 202.434 |
| 14410 | ENSG00000152583 | SPARCL1  | 1.5   | 0.0344598 | 0.095811  | 0.966   | 0.174 | 0.765   | 1.071   | 0.656   | 0.051 | 0.624   | 0.715   |
| 14411 | ENSG00000021574 | SPAST    | -1.1  | 0.0361563 | 0.0992231 | 22.769  | 0.799 | 21.879  | 23.423  | 25.557  | 2.654 | 23.192  | 28.428  |
| 14412 | ENSG00000182957 | SPATA13  | 1.3   | 1.001E-06 | 1.905E-05 | 7.962   | 0.414 | 7.559   | 8.387   | 6.184   | 0.265 | 5.896   | 6.416   |
| 14413 | ENSG00000163071 | SPATA18  | 1.4   | 3.488E-05 | 0.0003785 | 7.134   | 0.647 | 6.548   | 7.829   | 5.298   | 0.124 | 5.201   | 5.438   |
| 14414 | ENSG00000170469 | SPATA24  | -1.4  | 0.0034932 | 0.0159159 | 9.226   | 0.674 | 8.590   | 9.933   | 12.870  | 2.193 | 10.396  | 14.575  |
| 14416 | ENSG00000158792 | SPATA2L  | 1.4   | 0.0015501 | 0.0083168 | 6.763   | 0.071 | 6.722   | 6.845   | 5.017   | 0.533 | 4.505   | 5.569   |
| 14417 | ENSG00000167523 | SPATA33  | 1.3   | 0.0050905 | 0.0214433 | 2.560   | 0.287 | 2.256   | 2.826   | 1.947   | 0.309 | 1.606   | 2.207   |
| 14418 | ENSG00000171763 | SPATA5L1 | 1.1   | 0.0637533 | 0.1525984 | 8.453   | 0.936 | 7.374   | 9.055   | 7.540   | 0.352 | 7.154   | 7.842   |
| 14419 | ENSG00000132122 | SPATA6   | 1.4   | 5.176E-06 | 7.652E-05 | 6.616   | 0.383 | 6.221   | 6.986   | 4.815   | 0.331 | 4.445   | 5.083   |
| 14420 | ENSG00000160284 | SPATC1L  | -1.1  | 0.1156979 | 0.2365569 | 7.250   | 0.596 | 6.582   | 7.727   | 8.398   | 0.226 | 8.226   | 8.654   |
| 14421 | ENSG00000196141 | SPATS2L  | 1.4   | 3.27E-12  | 3.12E-10  | 36.563  | 3.096 | 34.131  | 40.048  | 26.703  | 1.431 | 25.295  | 28.157  |
| 14422 | ENSG00000118363 | SPCS2    | 1.1   | 0.0110402 | 0.0394681 | 36.015  | 0.680 | 35.275  | 36.614  | 32.932  | 2.263 | 30.431  | 34.838  |
| 14423 | ENSG00000228589 | SPCS2P4  | 1.1   | 0.0099287 | 0.0362453 | 152.633 | 7.952 | 145.679 | 161.303 | 140.181 | 3.075 | 138.271 | 143.729 |
| 14424 | ENSG00000129128 | SPCS3    | 1.2   | 2.201E-05 | 0.0002582 | 71.796  | 2.794 | 70.120  | 75.022  | 63.458  | 2.165 | 61.154  | 65.450  |
| 14426 | ENSG00000040275 | SPDL1    | -1.1  | 0.0490127 | 0.1252003 | 34.484  | 2.123 | 32.591  | 36.780  | 38.012  | 0.786 | 37.160  | 38.709  |
| 14427 | ENSG00000128487 | SPECC1   | -1.2  | 9.829E-07 | 1.876E-05 | 15.849  | 1.018 | 14.674  | 16.458  | 19.587  | 0.234 | 19.333  | 19.793  |
| 14428 | ENSG00000072195 | SPEG     | -1.2  | 0.0011935 | 0.0067761 | 5.059   | 0.128 | 4.971   | 5.205   | 6.050   | 0.350 | 5.647   | 6.261   |
| 14429 | ENSG00000104133 | SPG11    | 1.2   | 5.761E-06 | 8.393E-05 | 21.630  | 1.015 | 20.540  | 22.549  | 18.441  | 1.197 | 17.529  | 19.797  |
| 14430 | ENSG00000133104 | SPG20    | 1.2   | 1.028E-05 | 0.0001364 | 36.993  | 1.391 | 35.456  | 38.167  | 32.118  | 1.229 | 31.246  | 33.524  |
| 14431 | ENSG00000090487 | SPG21    | 1.3   | 7.545E-08 | 2.12E-06  | 61.672  | 2.207 | 59.160  | 63.297  | 50.246  | 0.522 | 49.848  | 50.838  |
| 14432 | ENSG00000176170 | SPHK1    | 1.3   | 0.059867  | 0.1454367 | 2.796   | 0.169 | 2.608   | 2.935   | 2.279   | 0.390 | 1.829   | 2.515   |
| 14434 | ENSG00000063176 | SPHK2    | -1.1  | 0.0174181 | 0.056616  | 12.732  | 1.298 | 11.679  | 14.182  | 14.871  | 1.822 | 13.109  | 16.747  |
| 14435 | ENSG00000269404 | SPIB     | 1.9   | 0.0003272 | 0.0023677 | 1.384   | 0.147 | 1.288   | 1.553   | 0.757   | 0.222 | 0.544   | 0.986   |
| 14436 | ENSG00000164808 | SPIDR    | 1.1   | 0.0153855 | 0.0515045 | 20.120  | 0.190 | 20.005  | 20.339  | 18.828  | 0.891 | 18.008  | 19.776  |
| 14438 | ENSG00000106723 | SPIN1    | 1.1   | 0.0169978 | 0.0555881 | 106.896 | 0.711 | 106.182 | 107.603 | 102.358 | 3.717 | 99.235  | 106.469 |
| 14440 | ENSG00000204271 | SPIN3    | 1.1   | 0.0286261 | 0.0832307 | 5.461   | 0.116 | 5.372   | 5.592   | 5.005   | 0.059 | 4.952   | 5.068   |
| 14442 | ENSG00000134278 | SPIRE1   | 1.2   | 0.0042439 | 0.0186048 | 8.012   | 0.112 | 7.892   | 8.115   | 6.988   | 0.081 | 6.919   | 7.077   |
| 14443 | ENSG00000204991 | SPIRE2   | -1.2  | 0.0026836 | 0.012905  | 3.294   | 0.062 | 3.242   | 3.363   | 4.125   | 0.321 | 3.756   | 4.343   |
| 14445 | ENSG00000197471 | SPN      | 1.6   | 0.0006618 | 0.0041924 | 1.334   | 0.037 | 1.292   | 1.361   | 0.879   | 0.044 | 0.842   | 0.927   |

|       | A               | B         | C    | D         | E         | F       | G     | H       | I       | J       | K     | L       | M       |
|-------|-----------------|-----------|------|-----------|-----------|---------|-------|---------|---------|---------|-------|---------|---------|
| 14446 | ENSG00000183018 | SPNS2     | -1.3 | 0.0460607 | 0.1192081 | 1.502   | 0.247 | 1.221   | 1.689   | 2.070   | 0.115 | 1.964   | 2.192   |
| 14447 | ENSG00000152377 | SPOCK1    | -1.1 | 0.028074  | 0.0820772 | 7.078   | 0.382 | 6.692   | 7.456   | 8.217   | 0.824 | 7.588   | 9.150   |
| 14448 | ENSG00000107742 | SPOCK2    | -1.3 | 0.0195582 | 0.0618873 | 1.290   | 0.261 | 0.989   | 1.452   | 1.736   | 0.155 | 1.601   | 1.905   |
| 14449 | ENSG00000198917 | SPOUT1    | 1.1  | 0.006122  | 0.0247511 | 32.447  | 1.556 | 30.763  | 33.832  | 29.704  | 1.621 | 27.833  | 30.668  |
| 14452 | ENSG00000118785 | SPP1      | 1.9  | 9.533E-10 | 4.7E-08   | 36.996  | 6.391 | 30.811  | 43.575  | 20.188  | 0.827 | 19.270  | 20.876  |
| 14453 | ENSG00000138600 | SPPL2A    | 1.3  | 2.31E-05  | 0.0002691 | 9.534   | 0.878 | 8.690   | 10.442  | 7.603   | 0.249 | 7.387   | 7.876   |
| 14454 | ENSG00000005206 | SPPL2B    | -1.2 | 0.0033133 | 0.0152567 | 9.750   | 0.125 | 9.608   | 9.842   | 11.696  | 1.217 | 10.411  | 12.832  |
| 14455 | ENSG00000157837 | SPPL3     | 1.2  | 1.315E-05 | 0.0001685 | 19.505  | 0.580 | 18.980  | 20.128  | 16.510  | 0.505 | 16.008  | 17.018  |
| 14456 | ENSG00000116096 | SPR       | 1.2  | 0.0358349 | 0.0985649 | 11.712  | 0.669 | 11.280  | 12.483  | 9.920   | 1.559 | 8.185   | 11.202  |
| 14457 | ENSG00000166068 | SPRED1    | 1.3  | 5.591E-07 | 1.183E-05 | 28.482  | 1.372 | 27.366  | 30.013  | 23.052  | 1.651 | 21.208  | 24.393  |
| 14458 | ENSG00000188766 | SPRED3    | 1.3  | 0.0391112 | 0.1050815 | 2.215   | 0.231 | 1.964   | 2.419   | 1.784   | 0.399 | 1.338   | 2.107   |
| 14459 | ENSG00000164056 | SPRY1     | -1.1 | 0.0761173 | 0.1743933 | 17.032  | 0.439 | 16.664  | 17.519  | 18.949  | 0.660 | 18.193  | 19.413  |
| 14460 | ENSG00000136158 | SPRY2     | 1.1  | 0.0058299 | 0.0238743 | 32.162  | 0.466 | 31.778  | 32.680  | 29.329  | 0.677 | 28.895  | 30.109  |
| 14461 | ENSG00000168939 | SPRY3     | -1.2 | 0.0126339 | 0.0439488 | 3.411   | 0.332 | 3.029   | 3.620   | 4.119   | 0.338 | 3.904   | 4.509   |
| 14462 | ENSG00000187678 | SPRY4     | 1.4  | 1.82E-14  | 3.12E-12  | 93.982  | 4.421 | 88.960  | 97.289  | 66.273  | 3.418 | 62.617  | 69.391  |
| 14463 | ENSG00000167778 | SPRYD3    | -1.2 | 0.0434182 | 0.1139029 | 6.997   | 0.210 | 6.795   | 7.215   | 8.284   | 1.015 | 7.544   | 9.441   |
| 14464 | ENSG0000011671  | SPSB2     | 1.2  | 0.0007052 | 0.0043993 | 26.062  | 1.825 | 24.688  | 28.132  | 21.924  | 1.418 | 20.584  | 23.409  |
| 14465 | ENSG00000197694 | SPTAN1    | 1.1  | 0.0518325 | 0.1305305 | 62.220  | 1.862 | 60.100  | 63.591  | 60.227  | 2.703 | 57.387  | 62.768  |
| 14466 | ENSG00000070182 | SPTB      | 1.3  | 0.0317175 | 0.090203  | 1.712   | 0.348 | 1.329   | 2.010   | 1.382   | 0.169 | 1.277   | 1.577   |
| 14467 | ENSG00000115306 | SPTBN1    | -1.1 | 0.0001361 | 0.0011605 | 56.557  | 0.990 | 55.510  | 57.480  | 63.872  | 1.739 | 61.933  | 65.293  |
| 14468 | ENSG00000173898 | SPTBN2    | 1.2  | 0.0003751 | 0.0026513 | 15.511  | 1.288 | 14.561  | 16.978  | 13.449  | 0.864 | 12.475  | 14.122  |
| 14469 | ENSG00000137877 | SPTBN5    | -1.3 | 0.0604687 | 0.1465252 | 0.628   | 0.065 | 0.575   | 0.700   | 0.806   | 0.167 | 0.649   | 0.982   |
| 14470 | ENSG00000090054 | SPTLC1    | 1.1  | 0.0479216 | 0.1229516 | 59.097  | 1.693 | 57.549  | 60.904  | 56.707  | 1.762 | 55.354  | 58.699  |
| 14471 | ENSG00000230397 | SPTLC1P1  | 1.3  | 0.0729265 | 0.1691219 | 30.281  | 7.971 | 21.109  | 35.537  | 24.427  | 2.928 | 22.393  | 27.783  |
| 14472 | ENSG00000100596 | SPTLC2    | -1.1 | 0.0190422 | 0.0606519 | 23.012  | 0.992 | 21.998  | 23.980  | 25.528  | 1.249 | 24.103  | 26.430  |
| 14473 | ENSG00000196542 | SPTSSB    | -1.2 | 0.0076206 | 0.0294601 | 12.987  | 0.622 | 12.269  | 13.367  | 15.361  | 0.311 | 15.095  | 15.703  |
| 14474 | ENSG00000134548 | SPX       | 2.5  | 2.823E-05 | 0.0003177 | 1.278   | 0.240 | 1.064   | 1.538   | 0.522   | 0.021 | 0.509   | 0.547   |
| 14475 | ENSG00000104549 | SQLE      | 1.5  | 7.25E-17  | 2.11E-14  | 109.606 | 4.165 | 104.826 | 112.457 | 75.239  | 2.108 | 73.985  | 77.673  |
| 14476 | ENSG00000161011 | SQSTM1    | 1.7  | 4.25E-17  | 1.41E-14  | 51.503  | 1.782 | 49.616  | 53.159  | 31.883  | 2.069 | 30.131  | 34.165  |
| 14477 | ENSG00000068784 | SRBD1     | 1.2  | 9.153E-05 | 0.0008418 | 22.266  | 0.712 | 21.465  | 22.828  | 18.932  | 1.500 | 17.360  | 20.347  |
| 14478 | ENSG00000277363 | SRCIN1    | -1.3 | 0.0869327 | 0.1930661 | 0.916   | 0.346 | 0.545   | 1.229   | 1.216   | 0.201 | 0.995   | 1.389   |
| 14479 | ENSG00000145545 | SRD5A1    | 1.2  | 0.0011748 | 0.0066923 | 13.497  | 0.876 | 12.523  | 14.219  | 11.719  | 1.050 | 10.513  | 12.427  |
| 14480 | ENSG00000072310 | SREBF1    | 1.6  | 5.194E-05 | 0.0005279 | 16.979  | 1.804 | 14.912  | 18.233  | 10.551  | 2.190 | 8.625   | 12.933  |
| 14481 | ENSG00000198911 | SREBF2    | 1.1  | 0.0013813 | 0.0075752 | 127.696 | 7.346 | 119.237 | 132.471 | 117.049 | 9.154 | 109.690 | 127.301 |
| 14482 | ENSG00000153914 | SREK1     | 1.1  | 0.037297  | 0.1013993 | 10.904  | 0.429 | 10.410  | 11.178  | 10.328  | 0.227 | 10.072  | 10.504  |
| 14483 | ENSG00000112658 | SRF       | 1.1  | 0.0092096 | 0.0340333 | 68.938  | 6.299 | 61.665  | 72.684  | 61.396  | 6.072 | 54.588  | 66.252  |
| 14484 | ENSG00000196935 | SRGAP1    | -1.2 | 0.0070471 | 0.0276601 | 1.377   | 0.059 | 1.309   | 1.415   | 1.670   | 0.034 | 1.632   | 1.698   |
| 14486 | ENSG00000266028 | SRGAP2    | -1.1 | 0.0730419 | 0.1692965 | 10.283  | 0.119 | 10.189  | 10.417  | 11.213  | 0.745 | 10.544  | 12.016  |
| 14487 | ENSG00000196220 | SRGAP3    | -1.6 | 2.059E-07 | 5.084E-06 | 1.033   | 0.080 | 0.960   | 1.118   | 1.666   | 0.042 | 1.623   | 1.707   |
| 14488 | ENSG00000116649 | SRM       | -1.2 | 0.0017462 | 0.0091605 | 62.144  | 2.522 | 60.209  | 64.996  | 73.420  | 5.372 | 69.877  | 79.600  |
| 14489 | ENSG00000248508 | SRP14-AS1 | -1.3 | 0.0407721 | 0.1085779 | 3.232   | 0.707 | 2.490   | 3.898   | 4.172   | 0.201 | 3.997   | 4.391   |



|       | A               | B         | C    | D         | E         | F        | G      | H        | I        | J        | K      | L       | M        |
|-------|-----------------|-----------|------|-----------|-----------|----------|--------|----------|----------|----------|--------|---------|----------|
| 14490 | ENSG00000258704 | SRP54-AS1 | -1.7 | 0.0066409 | 0.0263965 | 1.548    | 0.193  | 1.351    | 1.736    | 2.777    | 0.200  | 2.554   | 2.942    |
| 14491 | ENSG00000174780 | SRP72     | -1   | 0.1223591 | 0.2465109 | 92.774   | 0.876  | 91.956   | 93.699   | 98.872   | 2.062  | 97.247  | 101.191  |
| 14492 | ENSG00000180581 | SRP9P1    | 1.1  | 0.019846  | 0.0626224 | 1056.729 | 29.718 | 1025.780 | 1085.039 | 1002.685 | 26.956 | 983.738 | 1033.545 |
| 14493 | ENSG00000135250 | SRPK2     | -1.1 | 0.0028329 | 0.0134437 | 30.611   | 0.667  | 30.149   | 31.375   | 34.806   | 2.342  | 33.186  | 37.491   |
| 14494 | ENSG00000101955 | SRPX      | 1.3  | 0.003377  | 0.0154884 | 10.063   | 0.328  | 9.747    | 10.403   | 7.962    | 0.993  | 7.005   | 8.987    |
| 14495 | ENSG00000133226 | SRRM1     | -1.1 | 0.000127  | 0.0011005 | 70.568   | 2.142  | 68.273   | 72.513   | 81.386   | 1.262  | 80.596  | 82.841   |
| 14496 | ENSG00000167978 | SRRM2     | -1.1 | 5.794E-05 | 0.0005788 | 181.350  | 9.317  | 170.894  | 188.775  | 212.070  | 8.442  | 204.765 | 221.312  |
| 14498 | ENSG00000177679 | SRRM3     | -1.2 | 0.0005432 | 0.0035804 | 6.558    | 0.128  | 6.416    | 6.664    | 8.239    | 0.946  | 7.503   | 9.307    |
| 14499 | ENSG00000087087 | SRRT      | 1.2  | 0.0001098 | 0.000973  | 50.651   | 2.493  | 48.207   | 53.190   | 43.666   | 3.827  | 39.248  | 45.952   |
| 14500 | ENSG00000136450 | SRSF1     | -1.1 | 3.62E-05  | 0.0003902 | 349.884  | 1.466  | 348.689  | 351.520  | 400.163  | 5.914  | 394.107 | 405.925  |
| 14501 | ENSG00000188529 | SRSF10    | 1.1  | 0.000347  | 0.0024858 | 64.671   | 1.416  | 63.644   | 66.287   | 59.149   | 2.427  | 57.356  | 61.911   |
| 14502 | ENSG00000116754 | SRSF11    | -1.1 | 0.003632  | 0.0164288 | 109.266  | 1.501  | 107.576  | 110.443  | 120.719  | 3.224  | 118.836 | 124.441  |
| 14503 | ENSG00000161547 | SRSF2     | -1.1 | 0.0216718 | 0.067149  | 223.048  | 2.709  | 220.046  | 225.309  | 242.238  | 7.479  | 235.174 | 250.072  |
| 14504 | ENSG00000112081 | SRSF3     | 1.8  | 6.603E-06 | 9.369E-05 | 239.792  | 9.112  | 229.878  | 247.800  | 137.863  | 20.342 | 118.049 | 158.696  |
| 14505 | ENSG00000116350 | SRSF4     | -1.1 | 0.0063696 | 0.0255139 | 41.754   | 1.282  | 40.818   | 43.216   | 46.455   | 1.392  | 44.863  | 47.441   |
| 14507 | ENSG00000115875 | SRSF7     | 2.1  | 1.091E-06 | 2.057E-05 | 203.892  | 16.434 | 185.204  | 216.093  | 100.215  | 14.663 | 87.342  | 116.177  |
| 14508 | ENSG00000263465 | SRSF8     | 1.1  | 0.0189714 | 0.0604717 | 11.354   | 1.064  | 10.630   | 12.576   | 10.100   | 0.509  | 9.513   | 10.410   |
| 14510 | ENSG00000111786 | SRSF9     | -1.1 | 0.0758032 | 0.1738858 | 104.243  | 1.958  | 102.235  | 106.148  | 112.673  | 9.148  | 106.132 | 123.127  |
| 14511 | ENSG00000141380 | SS18      | 1.1  | 0.0017348 | 0.0091151 | 63.205   | 3.600  | 60.986   | 67.358   | 57.927   | 2.288  | 55.315  | 59.577   |
| 14512 | ENSG00000184402 | SS18L1    | -1.3 | 1.291E-07 | 3.407E-06 | 20.848   | 1.212  | 19.664   | 22.086   | 27.888   | 1.690  | 26.188  | 29.567   |
| 14513 | ENSG00000008324 | SS18L2    | -1.1 | 0.0364387 | 0.0998033 | 49.100   | 2.292  | 46.486   | 50.764   | 55.533   | 2.025  | 53.242  | 57.086   |
| 14514 | ENSG00000145687 | SSBP2     | -1.1 | 0.0049438 | 0.0209667 | 8.739    | 0.516  | 8.191    | 9.216    | 10.162   | 0.577  | 9.730   | 10.818   |
| 14515 | ENSG00000179954 | SSC5D     | -1.5 | 0.0423351 | 0.1116851 | 0.385    | 0.053  | 0.343    | 0.444    | 0.577    | 0.166  | 0.388   | 0.701    |
| 14516 | ENSG00000138434 | SSFA2     | 1.2  | 0.0088463 | 0.0330062 | 6.194    | 0.446  | 5.686    | 6.522    | 5.441    | 0.151  | 5.267   | 5.539    |
| 14517 | ENSG00000084112 | SSH1      | 1.3  | 2.349E-06 | 3.891E-05 | 8.500    | 0.291  | 8.189    | 8.765    | 6.905    | 0.401  | 6.442   | 7.144    |
| 14518 | ENSG00000141298 | SSH2      | 1.2  | 0.0003011 | 0.0022173 | 5.581    | 0.155  | 5.422    | 5.731    | 4.675    | 0.317  | 4.381   | 5.012    |
| 14519 | ENSG00000176101 | SSNA1     | -1.1 | 0.0424673 | 0.1118768 | 64.696   | 1.582  | 63.526   | 66.495   | 72.513   | 2.650  | 70.112  | 75.357   |
| 14520 | ENSG00000123096 | SSPN      | 1.4  | 0.0026769 | 0.0128802 | 2.085    | 0.271  | 1.775    | 2.272    | 1.542    | 0.190  | 1.366   | 1.743    |
| 14521 | ENSG00000197558 | SSPO      | -1.4 | 0.0285474 | 0.0830734 | 0.266    | 0.068  | 0.223    | 0.345    | 0.371    | 0.035  | 0.347   | 0.411    |
| 14522 | ENSG00000124783 | SSR1      | -1.1 | 0.0015735 | 0.0084138 | 33.139   | 1.035  | 31.946   | 33.799   | 37.521   | 2.203  | 35.961  | 40.042   |
| 14523 | ENSG00000163479 | SSR2      | -1.1 | 0.0002473 | 0.0018935 | 42.884   | 0.542  | 42.404   | 43.471   | 49.664   | 1.864  | 47.642  | 51.313   |
| 14524 | ENSG00000149136 | SSRP1     | -1.1 | 0.013609  | 0.0466683 | 131.954  | 6.826  | 125.228  | 138.877  | 144.512  | 3.157  | 140.916 | 146.827  |
| 14525 | ENSG00000173465 | SSSCA1    | -1.2 | 0.0131284 | 0.0453793 | 22.718   | 0.491  | 22.259   | 23.235   | 26.837   | 0.681  | 26.064  | 27.344   |
| 14526 | ENSG00000180616 | SSTR2     | -1.7 | 0.0004008 | 0.0028004 | 0.654    | 0.030  | 0.621    | 0.677    | 1.125    | 0.214  | 0.893   | 1.315    |
| 14527 | ENSG00000117155 | SSX2IP    | 1.1  | 0.1122902 | 0.2317466 | 13.597   | 0.258  | 13.382   | 13.883   | 12.976   | 1.234  | 12.134  | 14.392   |
| 14528 | ENSG00000225259 | ST13P6    | 1.1  | 0.012634  | 0.0439488 | 121.772  | 3.482  | 118.189  | 125.143  | 112.248  | 5.891  | 106.882 | 118.552  |
| 14529 | ENSG00000149418 | ST14      | 1.4  | 2.335E-05 | 0.0002712 | 14.541   | 0.529  | 13.984   | 15.036   | 10.952   | 1.204  | 9.745   | 12.152   |
| 14530 | ENSG00000008513 | ST3GAL1   | 1.5  | 0.0004989 | 0.0033499 | 2.965    | 0.464  | 2.436    | 3.300    | 2.056    | 0.483  | 1.512   | 2.437    |
| 14532 | ENSG00000157350 | ST3GAL2   | 1.1  | 0.0874756 | 0.1939024 | 10.064   | 0.130  | 9.940    | 10.198   | 9.509    | 0.842  | 8.632   | 10.312   |
| 14533 | ENSG00000126091 | ST3GAL3   | 1.2  | 0.0371999 | 0.1011839 | 5.788    | 0.458  | 5.265    | 6.114    | 5.030    | 0.573  | 4.369   | 5.371    |
| 14534 | ENSG00000110080 | ST3GAL4   | -1.2 | 0.0132606 | 0.0457707 | 5.020    | 0.071  | 4.938    | 5.063    | 6.213    | 0.759  | 5.356   | 6.803    |
| 14535 | ENSG00000144057 | ST6GAL2   | -1.2 | 0.0007306 | 0.0045244 | 5.343    | 0.132  | 5.233    | 5.489    | 6.656    | 0.470  | 6.322   | 7.193    |

|       | A               | B              | C    | D         | E         | F       | G     | H       | I       | J       | K     | L       | M       |
|-------|-----------------|----------------|------|-----------|-----------|---------|-------|---------|---------|---------|-------|---------|---------|
| 14536 | ENSG00000160408 | ST6GALNA<br>C6 | -1.1 | 0.0838747 | 0.1882644 | 14.467  | 1.035 | 13.410  | 15.478  | 16.137  | 1.715 | 14.429  | 17.859  |
| 14537 | ENSG00000007341 | ST7L           | -1.1 | 0.0360482 | 0.0989905 | 4.272   | 0.276 | 4.023   | 4.569   | 4.987   | 0.420 | 4.647   | 5.457   |
| 14538 | ENSG00000177511 | ST8SIA3        | 1.1  | 0.1165833 | 0.2379459 | 3.298   | 0.205 | 3.095   | 3.506   | 3.041   | 0.214 | 2.812   | 3.236   |
| 14539 | ENSG00000101638 | ST8SIA5        | -2.5 | 1.29E-05  | 0.0001657 | 0.131   | 0.009 | 0.123   | 0.140   | 0.334   | 0.038 | 0.295   | 0.370   |
| 14540 | ENSG0000010327  | STAB1          | -1.4 | 0.0697723 | 0.1634121 | 0.387   | 0.079 | 0.307   | 0.464   | 0.539   | 0.102 | 0.443   | 0.646   |
| 14541 | ENSG00000185482 | STAC3          | 1.4  | 0.012426  | 0.0433589 | 3.534   | 0.375 | 3.101   | 3.767   | 2.524   | 0.393 | 2.070   | 2.761   |
| 14542 | ENSG00000118007 | STAG1          | -1.1 | 0.0339132 | 0.0947118 | 10.176  | 0.328 | 9.829   | 10.482  | 11.423  | 0.349 | 11.065  | 11.761  |
| 14544 | ENSG00000101972 | STAG2          | -1.1 | 0.0018421 | 0.0095376 | 83.649  | 0.900 | 82.618  | 84.273  | 93.027  | 1.251 | 92.265  | 94.471  |
| 14545 | ENSG00000066923 | STAG3          | -1.2 | 0.0401651 | 0.1073129 | 3.177   | 0.459 | 2.659   | 3.532   | 3.763   | 0.232 | 3.592   | 4.027   |
| 14546 | ENSG00000106610 | STAG3L4        | 1.2  | 0.006972  | 0.0274377 | 14.698  | 0.695 | 13.912  | 15.231  | 12.504  | 1.248 | 11.581  | 13.924  |
| 14547 | ENSG00000124356 | STAMP          | 1.2  | 1.278E-06 | 2.328E-05 | 20.916  | 0.354 | 20.522  | 21.207  | 17.241  | 1.295 | 15.913  | 18.500  |
| 14548 | ENSG00000138134 | STAMPBPL1      | 1.2  | 0.0913059 | 0.2004746 | 2.507   | 0.151 | 2.360   | 2.663   | 2.184   | 0.103 | 2.078   | 2.284   |
| 14549 | ENSG00000147465 | STAR           | -1.3 | 0.0892346 | 0.1967989 | 1.075   | 0.222 | 0.862   | 1.305   | 1.436   | 0.229 | 1.246   | 1.690   |
| 14550 | ENSG00000214530 | STARD10        | -1.2 | 0.0062074 | 0.0250203 | 9.932   | 0.962 | 9.146   | 11.004  | 12.249  | 1.284 | 10.768  | 13.043  |
| 14552 | ENSG00000133121 | STARD13        | 2    | 1.748E-08 | 6.025E-07 | 2.084   | 0.090 | 1.989   | 2.167   | 1.071   | 0.073 | 0.988   | 1.129   |
| 14554 | ENSG00000010270 | STARD3NL       | 1.2  | 0.0001806 | 0.0014717 | 26.504  | 0.281 | 26.215  | 26.775  | 23.044  | 1.282 | 21.654  | 24.181  |
| 14555 | ENSG00000164211 | STARD4         | 1.6  | 1.63E-13  | 2.11E-11  | 83.246  | 2.149 | 81.832  | 85.719  | 51.867  | 3.300 | 48.251  | 54.714  |
| 14556 | ENSG00000130052 | STARD8         | -1.1 | 0.1194556 | 0.2420744 | 2.870   | 0.211 | 2.630   | 3.029   | 3.367   | 0.514 | 2.878   | 3.903   |
| 14557 | ENSG00000115415 | STAT1          | 1.1  | 0.0200534 | 0.0631588 | 66.692  | 1.957 | 64.487  | 68.224  | 63.455  | 2.865 | 60.165  | 65.398  |
| 14559 | ENSG00000170581 | STAT2          | -1.1 | 0.0880603 | 0.1948665 | 17.522  | 0.759 | 16.808  | 18.320  | 19.248  | 1.137 | 18.522  | 20.558  |
| 14560 | ENSG00000168610 | STAT3          | -1.1 | 0.0120521 | 0.0424041 | 30.387  | 1.151 | 29.070  | 31.201  | 33.672  | 0.971 | 33.010  | 34.787  |
| 14562 | ENSG00000173757 | STAT5B         | 1.1  | 0.0074847 | 0.0290275 | 43.022  | 1.706 | 41.142  | 44.474  | 40.278  | 0.853 | 39.437  | 41.144  |
| 14563 | ENSG00000166888 | STAT6          | 1.2  | 3.295E-06 | 5.17E-05  | 24.497  | 0.286 | 24.293  | 24.823  | 20.697  | 0.591 | 20.043  | 21.195  |
| 14564 | ENSG00000118804 | STBD1          | 1.4  | 0.1091109 | 0.2271532 | 1.054   | 0.167 | 0.863   | 1.176   | 0.778   | 0.084 | 0.681   | 0.830   |
| 14565 | ENSG00000159167 | STC1           | -8.6 | 6.648E-08 | 1.899E-06 | 5.604   | 1.197 | 4.629   | 6.939   | 49.252  | 9.234 | 39.864  | 58.324  |
| 14568 | ENSG00000113739 | STC2           | 1.8  | 1.38E-18  | 6.66E-16  | 54.081  | 4.146 | 49.801  | 58.078  | 31.414  | 1.373 | 29.854  | 32.435  |
| 14569 | ENSG00000164647 | STEAP1         | 1.2  | 0.0139518 | 0.0476508 | 11.502  | 0.647 | 10.774  | 12.010  | 9.506   | 1.252 | 8.229   | 10.732  |
| 14570 | ENSG00000105889 | STEAP1B        | 1.6  | 5.681E-05 | 0.0005689 | 5.255   | 0.107 | 5.135   | 5.339   | 3.398   | 0.282 | 3.073   | 3.567   |
| 14571 | ENSG00000157214 | STEAP2         | 1.1  | 0.0321864 | 0.0911669 | 20.999  | 0.257 | 20.838  | 21.295  | 19.764  | 1.908 | 18.554  | 21.964  |
| 14572 | ENSG00000115107 | STEAP3         | 1.1  | 0.0558343 | 0.1381806 | 18.884  | 1.265 | 17.844  | 20.292  | 17.554  | 0.722 | 17.021  | 18.376  |
| 14574 | ENSG00000168439 | STIP1          | -1.1 | 1.345E-05 | 0.0001714 | 153.134 | 3.150 | 151.229 | 156.770 | 177.314 | 1.645 | 175.424 | 178.426 |
| 14575 | ENSG00000072786 | STK10          | 1.1  | 0.0068138 | 0.0268816 | 7.078   | 0.145 | 6.945   | 7.234   | 6.305   | 0.389 | 6.078   | 6.754   |
| 14576 | ENSG00000118046 | STK11          | -1.2 | 4.668E-05 | 0.000485  | 20.418  | 1.210 | 19.505  | 21.790  | 24.723  | 1.844 | 23.208  | 26.776  |
| 14577 | ENSG00000115694 | STK25          | -1.1 | 0.0224668 | 0.069009  | 37.579  | 0.724 | 36.779  | 38.189  | 41.258  | 1.601 | 39.719  | 42.915  |
| 14578 | ENSG00000134602 | STK26          | -1.1 | 0.0405411 | 0.1081331 | 270.172 | 8.912 | 260.725 | 278.430 | 292.798 | 6.349 | 288.177 | 300.038 |
| 14579 | ENSG00000104375 | STK3           | -1.2 | 0.0002666 | 0.002014  | 6.630   | 0.315 | 6.269   | 6.850   | 8.333   | 0.695 | 7.711   | 9.083   |
| 14580 | ENSG00000165752 | STK32C         | -1.2 | 0.0264148 | 0.0781344 | 9.772   | 1.154 | 8.626   | 10.933  | 11.545  | 1.207 | 10.269  | 12.668  |
| 14581 | ENSG00000130413 | STK33          | 1.2  | 0.0004043 | 0.0028141 | 7.825   | 0.508 | 7.519   | 8.411   | 6.478   | 0.125 | 6.391   | 6.622   |
| 14582 | ENSG00000163482 | STK36          | 1.2  | 0.0007582 | 0.0046597 | 10.886  | 0.429 | 10.428  | 11.278  | 9.117   | 0.619 | 8.476   | 9.711   |

|       | A               | B                | C    | D         | E         | F       | G     | H       | I       | J       | K     | L       | M       |
|-------|-----------------|------------------|------|-----------|-----------|---------|-------|---------|---------|---------|-------|---------|---------|
| 14583 | ENSG00000112079 | STK38            | -1.1 | 0.0464674 | 0.1200952 | 22.919  | 0.509 | 22.460  | 23.466  | 25.640  | 1.946 | 23.495  | 27.291  |
| 14584 | ENSG00000211455 | STK38L           | 1.1  | 0.0828419 | 0.1863915 | 30.081  | 1.632 | 28.861  | 31.935  | 28.965  | 0.585 | 28.383  | 29.552  |
| 14585 | ENSG00000196182 | STK40            | 1.4  | 7.651E-08 | 2.146E-06 | 13.691  | 0.982 | 12.704  | 14.668  | 9.719   | 1.179 | 9.001   | 11.079  |
| 14586 | ENSG00000104435 | STMN2            | -1.6 | 0.0583543 | 0.1426117 | 0.877   | 0.373 | 0.505   | 1.250   | 1.425   | 0.304 | 1.183   | 1.766   |
| 14588 | ENSG00000107960 | STN1             | -1.2 | 0.0166583 | 0.0547603 | 30.326  | 2.983 | 26.953  | 32.616  | 35.768  | 1.840 | 33.659  | 37.052  |
| 14589 | ENSG00000148175 | STOM             | 1.2  | 0.0022247 | 0.0110244 | 33.244  | 2.728 | 30.148  | 35.295  | 29.332  | 0.979 | 28.218  | 30.058  |
| 14590 | ENSG00000243244 | STON1            | -1.1 | 0.1038577 | 0.2191571 | 13.094  | 0.974 | 12.047  | 13.973  | 14.395  | 0.633 | 13.739  | 15.002  |
| 14593 | ENSG00000137868 | STRA6            | -1.6 | 3.965E-06 | 6.063E-05 | 1.702   | 0.089 | 1.632   | 1.802   | 2.780   | 0.143 | 2.626   | 2.908   |
| 14594 | ENSG00000082146 | STRADB           | 1.1  | 0.0209194 | 0.0653982 | 31.715  | 2.543 | 28.797  | 33.455  | 29.116  | 0.859 | 28.141  | 29.762  |
| 14595 | ENSG00000023734 | STRAP            | -1.1 | 0.0029686 | 0.0139622 | 284.292 | 8.124 | 275.223 | 290.902 | 315.624 | 5.149 | 311.688 | 321.451 |
| 14596 | ENSG00000115808 | STRN             | 1.1  | 0.0014139 | 0.0077189 | 29.923  | 0.061 | 29.874  | 29.991  | 27.573  | 0.495 | 27.189  | 28.131  |
| 14597 | ENSG00000196792 | STRN3            | -1.2 | 0.0006009 | 0.0038845 | 22.219  | 1.027 | 21.335  | 23.345  | 26.265  | 0.833 | 25.664  | 27.216  |
| 14598 | ENSG00000101846 | STS              | 1.4  | 0.0130636 | 0.0452105 | 1.620   | 0.329 | 1.371   | 1.992   | 1.182   | 0.149 | 1.024   | 1.319   |
| 14599 | ENSG00000134910 | STT3A            | 1.1  | 0.0235175 | 0.0715766 | 52.457  | 0.907 | 51.704  | 53.464  | 50.197  | 1.412 | 49.282  | 51.823  |
| 14600 | ENSG00000163527 | STT3B            | -1.1 | 0.0212664 | 0.0661748 | 114.337 | 4.375 | 109.628 | 118.275 | 124.823 | 4.556 | 121.303 | 129.968 |
| 14601 | ENSG00000203685 | STUM             | -1.2 | 0.0555708 | 0.1376492 | 1.223   | 0.126 | 1.080   | 1.319   | 1.563   | 0.075 | 1.515   | 1.649   |
| 14602 | ENSG00000117758 | STX12            | -1.1 | 0.0841427 | 0.1885978 | 13.905  | 0.946 | 12.869  | 14.720  | 15.800  | 2.333 | 13.123  | 17.400  |
| 14604 | ENSG00000124222 | STX16            | -1.1 | 0.0405842 | 0.108214  | 60.459  | 2.547 | 58.403  | 63.309  | 65.800  | 1.565 | 64.198  | 67.324  |
| 14605 | ENSG00000254995 | STX16-<br>NPEPL1 | -1.3 | 0.0526545 | 0.1322236 | 2.022   | 0.165 | 1.875   | 2.201   | 2.622   | 0.239 | 2.472   | 2.897   |
| 14606 | ENSG00000136874 | STX17            | 1.2  | 0.0058775 | 0.0240229 | 19.222  | 1.315 | 17.786  | 20.368  | 17.041  | 1.252 | 15.607  | 17.921  |
| 14607 | ENSG00000168818 | STX18            | 1.2  | 0.0046476 | 0.0199904 | 9.378   | 0.694 | 8.648   | 10.030  | 8.052   | 0.386 | 7.762   | 8.490   |
| 14608 | ENSG00000106089 | STX1A            | -2   | 2.59E-07  | 6.187E-06 | 2.487   | 0.319 | 2.160   | 2.799   | 5.078   | 1.299 | 3.701   | 6.281   |
| 14609 | ENSG00000111450 | STX2             | -1.3 | 2.663E-05 | 0.0003018 | 27.992  | 1.860 | 26.905  | 30.140  | 36.164  | 4.488 | 31.452  | 40.388  |
| 14610 | ENSG00000166900 | STX3             | 1.1  | 0.000133  | 0.0011409 | 81.661  | 3.030 | 78.848  | 84.870  | 73.285  | 4.841 | 68.081  | 77.655  |
| 14611 | ENSG00000162236 | STX5             | -1.1 | 0.0109288 | 0.0391734 | 24.474  | 1.518 | 22.840  | 25.839  | 28.691  | 1.000 | 27.728  | 29.725  |
| 14612 | ENSG00000079950 | STX7             | 1.1  | 0.0012017 | 0.0068182 | 12.720  | 0.187 | 12.528  | 12.902  | 11.615  | 0.374 | 11.203  | 11.932  |
| 14613 | ENSG00000076944 | STXBP2           | 1.2  | 0.0142977 | 0.0486457 | 7.514   | 0.338 | 7.155   | 7.824   | 6.643   | 0.444 | 6.252   | 7.126   |
| 14614 | ENSG00000166263 | STXBP4           | -1.3 | 5.834E-05 | 0.0005815 | 2.166   | 0.082 | 2.102   | 2.258   | 2.894   | 0.294 | 2.555   | 3.069   |
| 14615 | ENSG00000145087 | STXBP5L          | 1.3  | 0.0006062 | 0.003915  | 2.257   | 0.237 | 2.016   | 2.491   | 1.723   | 0.105 | 1.626   | 1.834   |
| 14616 | ENSG00000198252 | STYX             | 1.1  | 0.0082313 | 0.0312776 | 33.803  | 0.672 | 33.077  | 34.403  | 31.114  | 1.340 | 29.596  | 32.133  |
| 14617 | ENSG00000113387 | SUB1             | 1.1  | 6.972E-05 | 0.0006734 | 72.192  | 1.440 | 71.218  | 73.846  | 65.060  | 2.524 | 62.164  | 66.790  |
| 14618 | ENSG00000163541 | SUCLG1           | 1.1  | 0.0871173 | 0.1933616 | 24.477  | 0.672 | 23.707  | 24.940  | 23.239  | 1.608 | 21.727  | 24.929  |
| 14619 | ENSG00000241316 | SUCLG2-<br>AS1   | 1.5  | 0.0338107 | 0.0945034 | 1.400   | 0.123 | 1.267   | 1.510   | 0.974   | 0.310 | 0.661   | 1.281   |
| 14621 | ENSG00000094975 | SUCO             | 1.1  | 0.0004638 | 0.0031452 | 36.592  | 1.206 | 35.255  | 37.599  | 33.196  | 0.590 | 32.520  | 33.602  |
| 14622 | ENSG00000107882 | SUFU             | -1.2 | 0.0059902 | 0.0243365 | 7.704   | 0.309 | 7.463   | 8.051   | 9.092   | 0.264 | 8.817   | 9.343   |
| 14623 | ENSG00000175600 | SUGCT            | 1.2  | 0.0760102 | 0.1741952 | 3.561   | 0.457 | 3.101   | 4.015   | 2.926   | 0.720 | 2.120   | 3.504   |
| 14624 | ENSG00000105705 | SUGP1            | -1.1 | 0.0549345 | 0.1365732 | 15.426  | 0.382 | 15.160  | 15.864  | 17.155  | 0.752 | 16.397  | 17.900  |
| 14625 | ENSG00000064607 | SUGP2            | -1.1 | 2.55E-05  | 0.000292  | 68.123  | 1.858 | 66.325  | 70.036  | 79.648  | 2.887 | 76.384  | 81.867  |
| 14626 | ENSG00000165416 | SUGT1            | -1.2 | 4.392E-05 | 0.0004599 | 14.022  | 0.698 | 13.249  | 14.606  | 16.662  | 0.397 | 16.244  | 17.034  |
| 14627 | ENSG00000137573 | SULF1            | -2.7 | 5.59E-17  | 1.69E-14  | 2.048   | 0.197 | 1.838   | 2.229   | 5.576   | 0.201 | 5.355   | 5.747   |
| 14628 | ENSG00000196562 | SULF2            | 1.3  | 3.311E-07 | 7.629E-06 | 16.942  | 0.683 | 16.467  | 17.725  | 13.013  | 0.249 | 12.735  | 13.215  |

|       | A               | B        | C    | D         | E         | F       | G      | H       | I       | J       | K      | L       | M       |
|-------|-----------------|----------|------|-----------|-----------|---------|--------|---------|---------|---------|--------|---------|---------|
| 14629 | ENSG00000196502 | SULT1A1  | 1.3  | 0.0037547 | 0.0168579 | 2.128   | 0.190  | 1.927   | 2.305   | 1.652   | 0.226  | 1.449   | 1.896   |
| 14630 | ENSG00000198203 | SULT1C2  | 1.5  | 4.042E-05 | 0.0004299 | 3.032   | 0.339  | 2.661   | 3.325   | 2.114   | 0.253  | 1.825   | 2.293   |
| 14632 | ENSG00000198075 | SULT1C4  | 1.2  | 0.1030814 | 0.2178997 | 3.853   | 0.328  | 3.650   | 4.231   | 3.294   | 0.290  | 3.052   | 3.616   |
| 14633 | ENSG00000144455 | SUMF1    | 1.4  | 1.434E-05 | 0.0001804 | 5.346   | 0.415  | 4.962   | 5.786   | 3.990   | 0.049  | 3.937   | 4.033   |
| 14634 | ENSG00000188612 | SUMO2    | -1.1 | 0.0005743 | 0.003746  | 172.094 | 6.427  | 165.432 | 178.258 | 196.282 | 5.188  | 193.169 | 202.272 |
| 14635 | ENSG00000235238 | SUMO2P1  | -1.1 | 0.0436775 | 0.1144588 | 442.830 | 12.862 | 433.620 | 457.525 | 490.188 | 24.111 | 475.734 | 518.022 |
| 14636 | ENSG00000164828 | SUN1     | -1.1 | 0.0001054 | 0.000943  | 29.127  | 0.857  | 28.445  | 30.089  | 33.524  | 0.589  | 32.898  | 34.067  |
| 14637 | ENSG00000100242 | SUN2     | 1.2  | 0.0054095 | 0.0224409 | 14.502  | 0.277  | 14.281  | 14.812  | 12.794  | 1.424  | 11.908  | 14.437  |
| 14638 | ENSG00000092201 | SUPT16H  | 1.1  | 0.0014062 | 0.007687  | 163.924 | 3.400  | 160.673 | 167.455 | 153.567 | 7.673  | 146.840 | 161.923 |
| 14639 | ENSG00000196284 | SUPT3H   | 1.2  | 0.001179  | 0.006711  | 16.954  | 1.051  | 15.766  | 17.762  | 14.491  | 0.464  | 14.003  | 14.927  |
| 14640 | ENSG00000196235 | SUPT5H   | -1.2 | 1.583E-06 | 2.78E-05  | 24.571  | 0.435  | 24.280  | 25.072  | 30.015  | 1.498  | 29.100  | 31.743  |
| 14641 | ENSG00000148296 | SURF6    | -1.1 | 0.013504  | 0.0464026 | 20.245  | 0.721  | 19.710  | 21.065  | 22.952  | 1.006  | 22.259  | 24.106  |
| 14642 | ENSG00000099994 | SUSD2    | -1.2 | 0.0932552 | 0.2030699 | 1.571   | 0.168  | 1.454   | 1.763   | 2.008   | 0.313  | 1.647   | 2.213   |
| 14643 | ENSG00000157303 | SUSD3    | -1.3 | 0.0112747 | 0.0401365 | 8.919   | 1.738  | 7.486   | 10.852  | 12.202  | 2.265  | 9.960   | 14.488  |
| 14644 | ENSG00000173705 | SUSD5    | 1.4  | 0.0017384 | 0.009128  | 2.989   | 0.576  | 2.418   | 3.570   | 2.104   | 0.384  | 1.833   | 2.543   |
| 14645 | ENSG00000100647 | SUSD6    | -1.2 | 0.0056837 | 0.0233888 | 4.184   | 0.328  | 3.852   | 4.508   | 5.220   | 0.339  | 4.875   | 5.553   |
| 14646 | ENSG00000101945 | SUV39H1  | -1.2 | 0.0025564 | 0.0123817 | 13.398  | 0.227  | 13.138  | 13.555  | 16.219  | 0.420  | 15.757  | 16.578  |
| 14647 | ENSG00000264538 | SUZ12P1  | 1.1  | 0.0134661 | 0.0463101 | 25.169  | 1.110  | 23.969  | 26.159  | 22.970  | 0.893  | 22.304  | 23.985  |
| 14648 | ENSG00000159164 | SV2A     | 1.2  | 5.854E-05 | 0.0005831 | 42.302  | 1.882  | 40.400  | 44.163  | 36.868  | 2.149  | 34.422  | 38.451  |
| 14649 | ENSG00000165124 | SVEP1    | 1.4  | 0.0155947 | 0.0520121 | 0.553   | 0.056  | 0.489   | 0.593   | 0.406   | 0.106  | 0.285   | 0.482   |
| 14650 | ENSG00000197321 | SVIL     | 1.3  | 4.432E-08 | 1.351E-06 | 14.091  | 0.970  | 13.314  | 15.178  | 10.909  | 0.814  | 10.198  | 11.796  |
| 14651 | ENSG00000224597 | SVIL-AS1 | 1.3  | 0.01526   | 0.0511378 | 2.284   | 0.240  | 2.010   | 2.455   | 1.764   | 0.268  | 1.555   | 2.067   |
| 14652 | ENSG00000198168 | SVIP     | 1.2  | 0.0008221 | 0.0049815 | 9.074   | 0.698  | 8.646   | 9.879   | 7.433   | 0.467  | 6.894   | 7.731   |
| 14653 | ENSG00000133789 | SWAP70   | 1.1  | 0.0486059 | 0.1242927 | 32.461  | 1.040  | 31.665  | 33.637  | 31.163  | 0.591  | 30.736  | 31.837  |
| 14654 | ENSG00000175854 | SWI5     | -1.1 | 0.0393404 | 0.1056135 | 22.911  | 1.868  | 21.489  | 25.027  | 26.532  | 2.456  | 24.390  | 29.212  |
| 14655 | ENSG00000205078 | SYCE1L   | 1.4  | 0.0113966 | 0.0404685 | 6.232   | 0.912  | 5.226   | 7.002   | 4.563   | 0.238  | 4.293   | 4.744   |
| 14656 | ENSG00000105137 | SYDE1    | 1.1  | 0.1016358 | 0.2156796 | 6.477   | 0.629  | 5.958   | 7.177   | 5.869   | 0.096  | 5.759   | 5.935   |
| 14657 | ENSG00000117614 | SYF2     | -1.2 | 0.0010995 | 0.006353  | 34.906  | 2.798  | 32.626  | 38.028  | 41.328  | 2.228  | 39.030  | 43.480  |
| 14658 | ENSG00000125755 | SYMPK    | -1.1 | 0.1006395 | 0.2140218 | 25.534  | 1.166  | 24.214  | 26.426  | 27.475  | 0.573  | 26.843  | 27.960  |
| 14659 | ENSG00000008056 | SYN1     | 1.2  | 0.1195156 | 0.2421651 | 3.876   | 0.327  | 3.556   | 4.210   | 3.371   | 0.769  | 2.489   | 3.901   |
| 14660 | ENSG00000185666 | SYN3     | -1.3 | 0.0073661 | 0.0286136 | 10.943  | 2.476  | 8.109   | 12.685  | 14.995  | 0.746  | 14.270  | 15.761  |
| 14661 | ENSG00000183379 | SYNDIG1L | -1.4 | 0.0026919 | 0.0129378 | 3.970   | 0.650  | 3.224   | 4.409   | 5.773   | 0.906  | 4.728   | 6.347   |
| 14662 | ENSG00000054654 | SYNE2    | 1.1  | 0.0222154 | 0.0683393 | 15.393  | 0.335  | 15.049  | 15.718  | 14.625  | 0.611  | 13.958  | 15.157  |
| 14663 | ENSG00000181392 | SYNE4    | 1.1  | 0.0250382 | 0.0750466 | 24.999  | 0.434  | 24.604  | 25.464  | 22.638  | 0.521  | 22.049  | 23.037  |
| 14664 | ENSG00000197283 | SYNGAP1  | -1.3 | 4.83E-11  | 3.418E-09 | 16.995  | 0.401  | 16.536  | 17.278  | 23.024  | 0.797  | 22.122  | 23.633  |
| 14665 | ENSG00000100321 | SYNGR1   | -1.2 | 0.0004135 | 0.0028664 | 9.396   | 0.381  | 9.067   | 9.814   | 11.640  | 0.831  | 11.089  | 12.596  |
| 14666 | ENSG00000127561 | SYNGR3   | 1.1  | 0.0201978 | 0.0635545 | 13.683  | 1.181  | 12.546  | 14.904  | 12.193  | 0.602  | 11.516  | 12.667  |
| 14667 | ENSG00000159082 | SYNJ1    | -1.2 | 0.0837031 | 0.1879791 | 1.646   | 0.030  | 1.628   | 1.680   | 1.981   | 0.035  | 1.957   | 2.021   |
| 14668 | ENSG00000078269 | SYNJ2    | 1.7  | 2.569E-09 | 1.131E-07 | 4.773   | 0.581  | 4.377   | 5.440   | 2.839   | 0.437  | 2.461   | 3.318   |
| 14669 | ENSG00000172403 | SYNPO2   | 1.3  | 0.0352291 | 0.0973579 | 0.739   | 0.058  | 0.684   | 0.800   | 0.601   | 0.029  | 0.583   | 0.635   |
| 14671 | ENSG00000008282 | SYPL1    | 1.1  | 0.0283163 | 0.0825712 | 108.934 | 4.668  | 105.957 | 114.314 | 102.973 | 2.713  | 99.841  | 104.567 |
| 14672 | ENSG00000110975 | SYT10    | -2   | 0.0010442 | 0.0060865 | 0.485   | 0.188  | 0.293   | 0.669   | 0.988   | 0.198  | 0.856   | 1.215   |
| 14674 | ENSG00000019505 | SYT13    | -1.1 | 0.1166115 | 0.2379645 | 12.918  | 0.264  | 12.658  | 13.185  | 14.218  | 0.804  | 13.342  | 14.923  |

|       | A               | B      | C    | D         | E         | F       | G      | H       | I       | J       | K     | L       | M       |
|-------|-----------------|--------|------|-----------|-----------|---------|--------|---------|---------|---------|-------|---------|---------|
| 14675 | ENSG00000139973 | SYT16  | 1.2  | 0.1234809 | 0.2481502 | 0.859   | 0.117  | 0.727   | 0.950   | 0.748   | 0.055 | 0.714   | 0.811   |
| 14676 | ENSG00000103528 | SYT17  | 1.5  | 2.508E-05 | 0.0002882 | 3.387   | 0.357  | 2.997   | 3.696   | 2.256   | 0.423 | 1.948   | 2.739   |
| 14677 | ENSG00000143858 | SYT2   | -1.2 | 0.0064768 | 0.0258477 | 4.282   | 0.405  | 3.817   | 4.561   | 5.177   | 0.346 | 4.934   | 5.573   |
| 14678 | ENSG00000213023 | SYT3   | -1.4 | 0.023465  | 0.0714684 | 1.721   | 0.468  | 1.266   | 2.201   | 2.394   | 0.400 | 2.090   | 2.847   |
| 14679 | ENSG00000132872 | SYT4   | -1.5 | 0.0001669 | 0.001377  | 2.314   | 0.335  | 2.064   | 2.695   | 3.524   | 0.427 | 3.031   | 3.780   |
| 14680 | ENSG00000011347 | SYT7   | -1.2 | 0.0036428 | 0.0164691 | 20.337  | 0.110  | 20.226  | 20.447  | 23.968  | 0.956 | 22.879  | 24.670  |
| 14681 | ENSG00000137501 | SYTL2  | 1.5  | 5.766E-06 | 8.393E-05 | 2.407   | 0.236  | 2.231   | 2.675   | 1.672   | 0.181 | 1.486   | 1.848   |
| 14682 | ENSG00000162298 | SYVN1  | -1.1 | 0.0183448 | 0.0589682 | 8.515   | 0.589  | 7.970   | 9.140   | 9.964   | 0.822 | 9.212   | 10.842  |
| 14683 | ENSG00000055070 | SZRD1  | -1.2 | 4.074E-05 | 0.0004323 | 56.146  | 0.395  | 55.736  | 56.525  | 66.347  | 3.816 | 61.995  | 69.123  |
| 14684 | ENSG00000100324 | TAB1   | -1.2 | 0.0016002 | 0.008532  | 21.955  | 1.528  | 20.589  | 23.605  | 26.086  | 1.456 | 24.640  | 27.552  |
| 14685 | ENSG00000055208 | TAB2   | -1.1 | 0.0052821 | 0.0220255 | 47.659  | 2.408  | 45.613  | 50.312  | 53.281  | 1.856 | 51.138  | 54.362  |
| 14686 | ENSG00000157625 | TAB3   | -1.1 | 0.0646137 | 0.1541125 | 11.060  | 0.749  | 10.221  | 11.662  | 12.169  | 0.646 | 11.436  | 12.657  |
| 14687 | ENSG00000006128 | TAC1   | 2.6  | 6.616E-09 | 2.608E-07 | 5.518   | 0.526  | 4.930   | 5.943   | 2.133   | 0.449 | 1.856   | 2.651   |
| 14688 | ENSG00000147526 | TACC1  | 1.3  | 8.845E-05 | 0.0008171 | 5.704   | 0.223  | 5.447   | 5.847   | 4.619   | 0.404 | 4.298   | 5.073   |
| 14689 | ENSG00000138162 | TACC2  | 1.2  | 2.867E-05 | 0.0003214 | 4.208   | 0.307  | 3.902   | 4.516   | 3.454   | 0.048 | 3.404   | 3.498   |
| 14690 | ENSG0000013810  | TACC3  | -1.3 | 1.803E-08 | 6.186E-07 | 72.389  | 3.817  | 69.928  | 76.785  | 96.563  | 8.559 | 87.285  | 104.151 |
| 14691 | ENSG00000136463 | TACO1  | 1.2  | 0.0054013 | 0.0224123 | 19.813  | 0.637  | 19.337  | 20.536  | 16.951  | 1.541 | 15.698  | 18.671  |
| 14692 | ENSG00000276234 | TADA2A | 1.2  | 0.0294286 | 0.0849796 | 7.434   | 0.860  | 6.554   | 8.274   | 6.597   | 0.487 | 6.058   | 7.004   |
| 14693 | ENSG00000173011 | TADA2B | -1.1 | 0.034337  | 0.0955547 | 6.606   | 0.386  | 6.165   | 6.881   | 7.628   | 0.228 | 7.397   | 7.852   |
| 14694 | ENSG00000171148 | TADA3  | 1.1  | 0.0891595 | 0.1966813 | 41.682  | 1.592  | 40.137  | 43.316  | 39.947  | 2.921 | 36.578  | 41.778  |
| 14695 | ENSG00000147133 | TAF1   | 1.1  | 0.0169988 | 0.0555881 | 15.426  | 0.318  | 15.104  | 15.740  | 14.465  | 0.636 | 13.907  | 15.158  |
| 14696 | ENSG00000064995 | TAF11  | -1.1 | 0.0780993 | 0.1780801 | 63.595  | 1.502  | 61.861  | 64.519  | 69.799  | 3.239 | 66.618  | 73.092  |
| 14698 | ENSG00000197780 | TAF13  | -1.2 | 0.0094483 | 0.0347821 | 37.839  | 2.385  | 35.962  | 40.523  | 44.613  | 3.546 | 40.600  | 47.324  |
| 14699 | ENSG00000270647 | TAF15  | 1.1  | 0.0380714 | 0.1029775 | 104.446 | 7.209  | 96.123  | 108.686 | 100.259 | 2.509 | 98.313  | 103.091 |
| 14701 | ENSG00000115750 | TAF1B  | -1.1 | 0.0174114 | 0.0566088 | 17.579  | 0.239  | 17.303  | 17.729  | 20.402  | 0.370 | 20.050  | 20.788  |
| 14702 | ENSG00000130699 | TAF4   | -1.1 | 0.0182316 | 0.0587112 | 7.814   | 0.313  | 7.501   | 8.127   | 8.927   | 0.429 | 8.487   | 9.344   |
| 14703 | ENSG00000148835 | TAF5   | -1.2 | 7.65E-05  | 0.0007254 | 17.782  | 0.448  | 17.360  | 18.252  | 22.513  | 1.314 | 21.004  | 23.402  |
| 14704 | ENSG00000137413 | TAF8   | -1.2 | 0.0018002 | 0.0093598 | 7.574   | 0.353  | 7.303   | 7.974   | 8.995   | 0.134 | 8.842   | 9.095   |
| 14705 | ENSG00000149591 | TAGLN  | 1.9  | 1.257E-10 | 7.96E-09  | 186.590 | 12.047 | 176.941 | 200.092 | 98.268  | 4.049 | 93.766  | 101.615 |
| 14706 | ENSG00000158710 | TAGLN2 | 1.2  | 0.0013704 | 0.0075278 | 52.975  | 3.568  | 49.033  | 55.983  | 47.029  | 1.253 | 45.709  | 48.203  |
| 14708 | ENSG00000144834 | TAGLN3 | 1.3  | 0.0149258 | 0.0502433 | 6.533   | 0.343  | 6.322   | 6.929   | 5.141   | 0.390 | 4.890   | 5.591   |
| 14709 | ENSG00000144559 | TAMM41 | 1.5  | 2.664E-07 | 6.345E-06 | 7.934   | 0.376  | 7.501   | 8.179   | 5.441   | 0.371 | 5.014   | 5.675   |
| 14711 | ENSG00000115183 | TANC1  | -1.1 | 0.0162248 | 0.0537216 | 4.724   | 0.025  | 4.695   | 4.742   | 5.457   | 0.265 | 5.300   | 5.763   |
| 14712 | ENSG00000183597 | TANGO2 | 1.1  | 0.0743295 | 0.1712951 | 4.682   | 0.523  | 4.186   | 5.228   | 4.219   | 0.074 | 4.140   | 4.288   |
| 14713 | ENSG00000160551 | TAOK1  | -1.1 | 0.0003119 | 0.0022787 | 36.329  | 0.527  | 35.903  | 36.918  | 41.093  | 0.725 | 40.352  | 41.800  |
| 14714 | ENSG00000149930 | TAOK2  | -1.1 | 0.0692623 | 0.1625186 | 12.035  | 0.197  | 11.810  | 12.176  | 13.332  | 1.536 | 12.252  | 15.091  |
| 14715 | ENSG00000135090 | TAOK3  | -1.1 | 0.1238835 | 0.248841  | 3.021   | 0.480  | 2.734   | 3.576   | 3.436   | 0.167 | 3.285   | 3.616   |
| 14716 | ENSG00000231925 | TAPBP  | 1.1  | 0.0916533 | 0.2009505 | 17.279  | 0.929  | 16.207  | 17.861  | 16.280  | 0.200 | 16.058  | 16.448  |
| 14717 | ENSG00000120948 | TARDBP | -1.1 | 0.0235749 | 0.071674  | 108.082 | 2.165  | 106.540 | 110.557 | 117.918 | 0.995 | 116.925 | 118.916 |
| 14718 | ENSG00000113407 | TARS   | 1.1  | 1.908E-06 | 3.262E-05 | 185.125 | 4.223  | 180.642 | 189.028 | 165.281 | 4.832 | 159.882 | 169.200 |
| 14719 | ENSG00000143374 | TARS2  | -1.2 | 0.0001471 | 0.0012375 | 27.962  | 0.423  | 27.668  | 28.446  | 33.634  | 1.321 | 32.829  | 35.159  |
| 14720 | ENSG00000185418 | TARSL2 | 1.1  | 0.0666914 | 0.1579764 | 10.123  | 0.453  | 9.620   | 10.500  | 9.216   | 1.264 | 7.864   | 10.367  |
| 14721 | ENSG00000127364 | TAS2R4 | 1.3  | 0.1191941 | 0.2416313 | 2.056   | 0.392  | 1.614   | 2.361   | 1.576   | 0.561 | 1.193   | 2.220   |

|       | A               | B        | C    | D         | E         | F       | G      | H       | I       | J       | K      | L       | M       |
|-------|-----------------|----------|------|-----------|-----------|---------|--------|---------|---------|---------|--------|---------|---------|
| 14722 | ENSG00000065882 | TBC1D1   | -1.1 | 0.0122734 | 0.0429949 | 41.278  | 0.264  | 41.008  | 41.535  | 45.772  | 2.858  | 42.556  | 48.022  |
| 14723 | ENSG00000169221 | TBC1D10B | -1.3 | 9.574E-05 | 0.0008724 | 7.822   | 0.898  | 7.228   | 8.855   | 10.215  | 0.871  | 9.574   | 11.206  |
| 14724 | ENSG00000108239 | TBC1D12  | 1.3  | 0.0064536 | 0.0257792 | 2.981   | 0.351  | 2.691   | 3.371   | 2.386   | 0.295  | 2.087   | 2.677   |
| 14725 | ENSG00000107021 | TBC1D13  | 1.2  | 0.003502  | 0.0159477 | 20.720  | 0.365  | 20.467  | 21.139  | 18.026  | 2.412  | 15.255  | 19.656  |
| 14726 | ENSG00000167291 | TBC1D16  | 1.1  | 0.0008408 | 0.0050807 | 36.968  | 1.463  | 35.279  | 37.830  | 33.658  | 2.840  | 31.974  | 36.938  |
| 14727 | ENSG00000104946 | TBC1D17  | -1.1 | 0.1058105 | 0.2219678 | 14.472  | 0.520  | 13.909  | 14.936  | 15.948  | 0.891  | 15.383  | 16.975  |
| 14728 | ENSG00000214946 | TBC1D26  | -1.4 | 0.1042378 | 0.2197319 | 0.479   | 0.095  | 0.389   | 0.579   | 0.669   | 0.159  | 0.556   | 0.851   |
| 14729 | ENSG00000167202 | TBC1D2B  | -1.2 | 0.000113  | 0.000997  | 9.119   | 0.157  | 8.989   | 9.293   | 11.132  | 0.734  | 10.284  | 11.564  |
| 14730 | ENSG00000146350 | TBC1D32  | -1.2 | 0.0473696 | 0.1218469 | 3.137   | 0.260  | 2.926   | 3.427   | 3.724   | 0.357  | 3.485   | 4.134   |
| 14731 | ENSG00000136111 | TBC1D4   | -1.1 | 0.0026573 | 0.0128043 | 30.886  | 0.259  | 30.689  | 31.179  | 35.198  | 2.921  | 31.862  | 37.298  |
| 14732 | ENSG00000131374 | TBC1D5   | -1.1 | 0.0083215 | 0.031514  | 13.883  | 0.466  | 13.459  | 14.382  | 15.658  | 1.092  | 14.980  | 16.918  |
| 14734 | ENSG00000145979 | TBC1D7   | -1.1 | 0.0043308 | 0.018912  | 7.656   | 0.188  | 7.494   | 7.862   | 8.995   | 0.411  | 8.570   | 9.390   |
| 14735 | ENSG00000133138 | TBC1D8B  | -1.1 | 0.0209751 | 0.0655006 | 4.759   | 0.209  | 4.538   | 4.953   | 5.563   | 0.334  | 5.310   | 5.943   |
| 14736 | ENSG00000109436 | TBC1D9   | 2    | 0.0018537 | 0.0095724 | 1.042   | 0.523  | 0.606   | 1.622   | 0.544   | 0.163  | 0.391   | 0.715   |
| 14737 | ENSG00000171530 | TBCA     | 1.1  | 0.0950123 | 0.2059919 | 99.719  | 3.728  | 96.915  | 103.950 | 96.842  | 3.296  | 93.722  | 100.289 |
| 14739 | ENSG00000141556 | TBCD     | 1.2  | 1.441E-05 | 0.0001808 | 28.292  | 1.652  | 26.410  | 29.502  | 24.677  | 1.478  | 23.137  | 26.085  |
| 14740 | ENSG00000116957 | TBCE     | 1.3  | 5.055E-08 | 1.508E-06 | 51.826  | 3.049  | 48.849  | 54.942  | 40.228  | 1.505  | 38.491  | 41.123  |
| 14741 | ENSG00000154114 | TBCEL    | 1.2  | 0.0053225 | 0.0221394 | 10.490  | 1.108  | 9.444   | 11.652  | 9.258   | 0.196  | 9.081   | 9.469   |
| 14742 | ENSG00000145348 | TBCK     | 1.2  | 0.0007751 | 0.0047395 | 8.578   | 0.555  | 7.937   | 8.916   | 7.423   | 0.371  | 6.995   | 7.659   |
| 14743 | ENSG00000183735 | TBK1     | 1.1  | 0.0692523 | 0.1625175 | 23.423  | 0.697  | 22.648  | 23.997  | 22.139  | 1.121  | 21.296  | 23.410  |
| 14744 | ENSG00000198933 | TBKBP1   | 1.1  | 0.0650719 | 0.1548996 | 10.658  | 0.704  | 10.114  | 11.453  | 9.761   | 0.325  | 9.436   | 10.086  |
| 14745 | ENSG00000101849 | TBL1X    | -1.1 | 0.0991556 | 0.2120661 | 34.064  | 2.067  | 31.829  | 35.907  | 36.898  | 1.915  | 34.742  | 38.402  |
| 14746 | ENSG00000177565 | TBL1XR1  | -1.2 | 6.948E-09 | 2.694E-07 | 26.404  | 0.942  | 25.389  | 27.250  | 33.727  | 1.137  | 32.591  | 34.865  |
| 14747 | ENSG00000106638 | TBL2     | -1.3 | 7.459E-05 | 0.0007117 | 9.334   | 0.350  | 9.120   | 9.739   | 11.958  | 0.188  | 11.791  | 12.161  |
| 14748 | ENSG00000183751 | TBL3     | -1.1 | 0.0465596 | 0.1202599 | 18.276  | 1.045  | 17.071  | 18.944  | 20.223  | 0.932  | 19.252  | 21.109  |
| 14749 | ENSG00000112592 | TBP      | -1.1 | 0.108288  | 0.2259128 | 29.073  | 1.096  | 28.409  | 30.338  | 32.018  | 0.325  | 31.678  | 32.326  |
| 14750 | ENSG00000154144 | TBRG1    | 1.1  | 0.0267347 | 0.0788565 | 19.235  | 1.096  | 18.525  | 20.497  | 17.902  | 0.221  | 17.653  | 18.078  |
| 14751 | ENSG00000136270 | TBRG4    | -1.2 | 2.014E-06 | 3.409E-05 | 41.661  | 1.146  | 40.359  | 42.515  | 50.461  | 1.588  | 48.867  | 52.043  |
| 14752 | ENSG00000198420 | TCAF1    | -1.5 | 7.48E-14  | 1.08E-11  | 34.014  | 0.814  | 33.087  | 34.609  | 50.904  | 3.189  | 48.348  | 54.478  |
| 14753 | ENSG00000223459 | TCAF1P1  | -1.4 | 1.73E-08  | 5.982E-07 | 22.665  | 0.512  | 22.239  | 23.233  | 32.880  | 1.260  | 31.467  | 33.886  |
| 14754 | ENSG00000173991 | TCAP     | -1.6 | 0.0039989 | 0.0177608 | 1.558   | 0.314  | 1.252   | 1.879   | 2.592   | 0.487  | 2.122   | 3.094   |
| 14755 | ENSG00000187735 | TCEA1    | 1.6  | 5.33E-18  | 2.20E-15  | 180.458 | 5.987  | 173.623 | 184.778 | 113.709 | 6.303  | 109.609 | 120.966 |
| 14756 | ENSG00000230409 | TCEA1P2  | 1.6  | 2.68E-17  | 9.26E-15  | 668.173 | 44.058 | 623.388 | 711.466 | 417.461 | 22.699 | 395.456 | 440.795 |
| 14757 | ENSG00000184905 | TCEAL2   | 1.3  | 0.0001243 | 0.0010796 | 36.223  | 5.167  | 32.967  | 42.180  | 28.887  | 0.882  | 27.975  | 29.736  |
| 14758 | ENSG00000133142 | TCEAL4   | 1.3  | 2.786E-09 | 1.214E-07 | 110.288 | 4.914  | 104.791 | 114.253 | 87.878  | 2.726  | 85.829  | 90.972  |
| 14759 | ENSG00000204065 | TCEAL5   | 1.2  | 0.0067604 | 0.0267396 | 26.192  | 1.417  | 24.966  | 27.743  | 21.834  | 2.299  | 19.550  | 24.147  |
| 14761 | ENSG00000204071 | TCEAL6   | 2    | 0.0002945 | 0.002181  | 4.740   | 1.843  | 3.546   | 6.862   | 2.444   | 0.461  | 1.991   | 2.913   |
| 14762 | ENSG00000180964 | TCEAL8   | 1.1  | 0.0635571 | 0.1522189 | 208.403 | 4.414  | 203.837 | 212.647 | 200.410 | 4.865  | 194.795 | 203.351 |
| 14764 | ENSG00000185222 | TCEAL9   | 1.1  | 0.00629   | 0.0252872 | 199.957 | 5.801  | 195.757 | 206.576 | 185.068 | 7.006  | 178.742 | 192.598 |
| 14766 | ENSG00000113649 | TCERG1   | -1.2 | 2.505E-07 | 6.011E-06 | 69.631  | 0.479  | 69.343  | 70.184  | 84.235  | 3.917  | 80.662  | 88.423  |
| 14767 | ENSG00000176769 | TCERG1L  | -1.4 | 0.000282  | 0.0021091 | 2.766   | 0.157  | 2.585   | 2.864   | 3.912   | 0.512  | 3.523   | 4.491   |
| 14768 | ENSG00000140262 | TCF12    | -1.1 | 0.0589766 | 0.1437279 | 32.048  | 0.661  | 31.323  | 32.617  | 34.579  | 0.580  | 34.124  | 35.233  |

|       | A               | B       | C    | D         | E         | F       | G      | H       | I       | J       | K      | L       | M       |
|-------|-----------------|---------|------|-----------|-----------|---------|--------|---------|---------|---------|--------|---------|---------|
| 14769 | ENSG00000125878 | TCF15   | -1.4 | 0.0185094 | 0.0592898 | 3.969   | 0.400  | 3.515   | 4.273   | 5.535   | 0.973  | 4.594   | 6.538   |
| 14771 | ENSG00000137310 | TCF19   | 1.3  | 0.0002983 | 0.0022021 | 10.426  | 0.978  | 9.306   | 11.108  | 8.122   | 0.126  | 8.033   | 8.266   |
| 14772 | ENSG00000100207 | TCF20   | -1.1 | 0.0498976 | 0.1267525 | 30.994  | 0.875  | 29.986  | 31.562  | 33.687  | 0.633  | 33.002  | 34.251  |
| 14773 | ENSG00000071564 | TCF3    | -1.1 | 0.0015026 | 0.0081018 | 80.063  | 1.633  | 78.315  | 81.548  | 90.836  | 4.562  | 86.600  | 95.666  |
| 14774 | ENSG00000196628 | TCF4    | -1.2 | 5.25E-07  | 1.125E-05 | 11.315  | 0.513  | 10.942  | 11.901  | 14.001  | 0.565  | 13.628  | 14.651  |
| 14775 | ENSG00000081059 | TCF7    | 1.3  | 0.0005192 | 0.003456  | 2.625   | 0.254  | 2.333   | 2.783   | 2.004   | 0.239  | 1.728   | 2.160   |
| 14776 | ENSG00000152284 | TCF7L1  | -1.3 | 6.96E-09  | 2.694E-07 | 46.692  | 1.595  | 44.855  | 47.729  | 62.152  | 2.113  | 59.812  | 63.920  |
| 14777 | ENSG00000148737 | TCF7L2  | -1.1 | 0.0050063 | 0.0211677 | 29.590  | 2.722  | 26.544  | 31.783  | 33.661  | 0.157  | 33.504  | 33.818  |
| 14779 | ENSG00000101190 | TCFL5   | -1.1 | 0.0364671 | 0.0998299 | 16.783  | 0.481  | 16.382  | 17.317  | 19.006  | 0.738  | 18.162  | 19.525  |
| 14780 | ENSG00000110719 | TCIRG1  | -1.2 | 0.0077923 | 0.0300071 | 6.891   | 1.160  | 6.066   | 8.217   | 8.667   | 1.199  | 7.652   | 9.989   |
| 14782 | ENSG00000185339 | TCN2    | 1.4  | 1.845E-10 | 1.126E-08 | 56.882  | 1.754  | 55.547  | 58.869  | 42.019  | 3.048  | 38.595  | 44.435  |
| 14783 | ENSG00000120438 | TCP1    | -1.1 | 2.637E-06 | 4.314E-05 | 154.609 | 3.721  | 150.391 | 157.425 | 180.886 | 2.371  | 178.772 | 183.449 |
| 14787 | ENSG00000256849 | TCP1P3  | -1.3 | 0.0758344 | 0.1739101 | 4.466   | 0.692  | 3.795   | 5.178   | 5.716   | 0.416  | 5.236   | 5.961   |
| 14788 | ENSG00000204852 | TCTN1   | 1.3  | 0.000435  | 0.0029859 | 4.507   | 0.251  | 4.219   | 4.676   | 3.659   | 0.052  | 3.627   | 3.718   |
| 14791 | ENSG00000168778 | TCTN2   | 1.2  | 0.0386857 | 0.1041921 | 4.274   | 0.171  | 4.077   | 4.377   | 3.614   | 0.653  | 2.909   | 4.197   |
| 14792 | ENSG00000139372 | TDG     | -1.1 | 0.0020372 | 0.0103036 | 41.140  | 2.393  | 39.584  | 43.895  | 47.255  | 2.727  | 45.115  | 50.325  |
| 14793 | ENSG00000241186 | TDGF1   | -1.2 | 5.174E-08 | 1.532E-06 | 538.735 | 16.921 | 526.924 | 558.120 | 662.403 | 40.404 | 615.875 | 688.653 |
| 14794 | ENSG00000225366 | TDGF1P3 | -1.2 | 8.696E-07 | 1.701E-05 | 126.077 | 5.228  | 120.241 | 130.331 | 154.520 | 8.110  | 145.655 | 161.565 |
| 14795 | ENSG00000111802 | TDP2    | 1.1  | 0.0316987 | 0.0901649 | 60.836  | 2.834  | 58.105  | 63.762  | 57.483  | 0.724  | 57.038  | 58.318  |
| 14796 | ENSG00000083544 | TDRD3   | -1.1 | 0.0357509 | 0.0983819 | 7.392   | 0.757  | 6.526   | 7.930   | 8.509   | 0.453  | 8.136   | 9.013   |
| 14797 | ENSG00000204091 | TDRG1   | -1.8 | 0.0460454 | 0.1191868 | 0.581   | 0.298  | 0.365   | 0.921   | 1.095   | 0.405  | 0.768   | 1.548   |
| 14798 | ENSG00000187079 | TEAD1   | 1.3  | 5.931E-08 | 1.724E-06 | 43.691  | 1.522  | 42.258  | 45.289  | 35.562  | 3.474  | 31.954  | 38.885  |
| 14799 | ENSG00000197905 | TEAD4   | 1.2  | 2.204E-06 | 3.677E-05 | 60.033  | 3.039  | 56.525  | 61.840  | 49.082  | 3.226  | 47.010  | 52.798  |
| 14800 | ENSG00000205356 | TECPR1  | 1.3  | 0.0003183 | 0.0023186 | 4.393   | 0.277  | 4.161   | 4.700   | 3.540   | 0.184  | 3.332   | 3.683   |
| 14801 | ENSG00000100726 | TELO2   | -1.1 | 0.0928585 | 0.2025032 | 22.750  | 2.046  | 20.389  | 23.963  | 25.176  | 2.506  | 22.834  | 27.819  |
| 14802 | ENSG00000009694 | TENM1   | 1.2  | 0.0286259 | 0.0832307 | 2.961   | 0.328  | 2.669   | 3.316   | 2.627   | 0.084  | 2.559   | 2.722   |
| 14803 | ENSG00000145934 | TENM2   | 1.5  | 0.0036877 | 0.016621  | 0.760   | 0.231  | 0.567   | 1.016   | 0.516   | 0.041  | 0.478   | 0.559   |
| 14804 | ENSG00000218336 | TENM3   | -1.1 | 0.0165989 | 0.0546393 | 27.480  | 2.197  | 25.314  | 29.706  | 30.392  | 1.214  | 28.991  | 31.141  |
| 14805 | ENSG00000149256 | TENM4   | -1.3 | 0.014006  | 0.0477877 | 1.053   | 0.248  | 0.778   | 1.259   | 1.375   | 0.025  | 1.349   | 1.398   |
| 14806 | ENSG00000167302 | TEPSIN  | -1.1 | 0.0578975 | 0.1418544 | 6.925   | 0.381  | 6.508   | 7.255   | 7.981   | 0.484  | 7.675   | 8.539   |
| 14807 | ENSG00000147601 | TERF1   | -1.3 | 2.622E-08 | 8.594E-07 | 140.164 | 5.396  | 133.971 | 143.853 | 183.977 | 12.083 | 176.235 | 197.900 |
| 14809 | ENSG00000173231 | TERF1P1 | -1.3 | 0.0024089 | 0.0117888 | 14.791  | 2.439  | 11.974  | 16.205  | 19.924  | 2.600  | 17.964  | 22.874  |
| 14810 | ENSG00000187589 | TERF1P2 | -1.2 | 0.0021305 | 0.010651  | 21.871  | 0.980  | 21.165  | 22.991  | 27.717  | 1.887  | 25.655  | 29.358  |
| 14811 | ENSG00000249311 | TERF1P3 | -1.6 | 0.003252  | 0.0150236 | 3.219   | 0.804  | 2.358   | 3.950   | 5.418   | 0.749  | 4.844   | 6.265   |
| 14813 | ENSG00000215102 | TERF1P4 | -1.3 | 3.959E-06 | 6.061E-05 | 64.955  | 2.990  | 61.610  | 67.369  | 85.337  | 4.002  | 82.872  | 89.954  |
| 14814 | ENSG00000226361 | TERF1P5 | -1.4 | 3.045E-08 | 9.734E-07 | 58.928  | 2.703  | 57.287  | 62.048  | 82.009  | 4.303  | 77.533  | 86.116  |
| 14815 | ENSG00000164362 | TERT    | -1.7 | 3.618E-09 | 1.545E-07 | 6.216   | 1.031  | 5.025   | 6.813   | 10.772  | 0.467  | 10.362  | 11.280  |
| 14816 | ENSG00000135269 | TES     | 1.2  | 0.0001133 | 0.0009984 | 25.885  | 0.580  | 25.272  | 26.424  | 22.107  | 1.929  | 20.427  | 24.214  |
| 14817 | ENSG00000088992 | TESC    | -1.5 | 0.0041446 | 0.0182833 | 2.590   | 0.472  | 2.070   | 2.992   | 3.970   | 0.123  | 3.898   | 4.112   |
| 14819 | ENSG00000107140 | TESK1   | -1.2 | 0.0117353 | 0.0414795 | 7.095   | 0.734  | 6.550   | 7.929   | 8.793   | 0.688  | 8.052   | 9.412   |
| 14820 | ENSG00000070759 | TESK2   | -1.3 | 4.985E-05 | 0.0005121 | 12.740  | 0.952  | 11.689  | 13.544  | 16.880  | 1.497  | 15.272  | 18.232  |
| 14821 | ENSG00000132749 | TESMIN  | -1.1 | 0.0094988 | 0.0349322 | 15.499  | 0.487  | 14.959  | 15.906  | 17.775  | 0.734  | 17.224  | 18.608  |
| 14822 | ENSG00000138336 | TET1    | -1.2 | 7.724E-06 | 0.000107  | 34.266  | 0.424  | 33.843  | 34.692  | 40.540  | 0.697  | 39.845  | 41.238  |

|       | A               | B        | C    | D         | E         | F      | G     | H      | I      | J      | K     | L      | M      |
|-------|-----------------|----------|------|-----------|-----------|--------|-------|--------|--------|--------|-------|--------|--------|
| 14823 | ENSG00000187605 | TET3     | 1.1  | 0.0332416 | 0.0933447 | 11.106 | 0.344 | 10.708 | 11.316 | 10.447 | 0.182 | 10.282 | 10.642 |
| 14825 | ENSG00000170925 | TEX13B   | -1.3 | 0.0591576 | 0.1440858 | 3.798  | 0.431 | 3.315  | 4.141  | 5.266  | 1.285 | 3.982  | 6.552  |
| 14827 | ENSG00000133863 | TEX15    | 1.2  | 0.0014802 | 0.0080036 | 5.042  | 0.343 | 4.725  | 5.405  | 4.254  | 0.209 | 4.035  | 4.450  |
| 14828 | ENSG00000182459 | TEX19    | 1.7  | 0.00396   | 0.0176376 | 2.806  | 0.581 | 2.135  | 3.155  | 1.665  | 0.357 | 1.293  | 2.005  |
| 14829 | ENSG00000136478 | TEX2     | 1.2  | 0.0017959 | 0.0093445 | 6.733  | 0.338 | 6.352  | 6.995  | 5.820  | 0.197 | 5.601  | 5.985  |
| 14832 | ENSG00000144043 | TEX261   | 1.2  | 0.000547  | 0.0035981 | 11.300 | 0.339 | 11.056 | 11.687 | 9.308  | 0.927 | 8.261  | 10.025 |
| 14833 | ENSG00000164081 | TEX264   | 1.2  | 0.0080957 | 0.0308716 | 5.382  | 0.188 | 5.165  | 5.501  | 4.486  | 0.597 | 3.844  | 5.024  |
| 14835 | ENSG00000151575 | TEX9     | 1.2  | 0.0182464 | 0.0587475 | 3.221  | 0.362 | 2.822  | 3.526  | 2.763  | 0.032 | 2.736  | 2.798  |
| 14836 | ENSG00000108064 | TFAM     | 1.1  | 0.048226  | 0.1234706 | 67.010 | 1.379 | 65.563 | 68.309 | 64.635 | 0.884 | 63.832 | 65.582 |
| 14837 | ENSG00000087510 | TFAP2C   | -1.6 | 1.216E-07 | 3.234E-06 | 6.951  | 0.390 | 6.637  | 7.387  | 11.343 | 0.586 | 10.722 | 11.885 |
| 14838 | ENSG00000162851 | TFB2M    | -1.1 | 0.0211998 | 0.0660528 | 24.956 | 0.797 | 24.128 | 25.718 | 28.753 | 0.815 | 27.814 | 29.282 |
| 14839 | ENSG00000115112 | TFCP2L1  | 1.2  | 0.0057762 | 0.0236947 | 3.029  | 0.215 | 2.893  | 3.277  | 2.519  | 0.151 | 2.368  | 2.670  |
| 14840 | ENSG00000198176 | TFDP1    | 1.1  | 0.0478047 | 0.1226978 | 55.958 | 1.783 | 54.321 | 57.858 | 53.397 | 2.105 | 50.967 | 54.672 |
| 14841 | ENSG00000114126 | TFDP2    | -1.1 | 0.0001062 | 0.0009471 | 24.312 | 1.102 | 23.167 | 25.367 | 28.306 | 0.612 | 27.609 | 28.750 |
| 14842 | ENSG00000112561 | TFEB     | -2.4 | 0.000317  | 0.0023108 | 0.245  | 0.067 | 0.183  | 0.317  | 0.604  | 0.105 | 0.498  | 0.709  |
| 14843 | ENSG00000114354 | TFG      | -1.1 | 0.0012145 | 0.0068674 | 48.037 | 0.423 | 47.554 | 48.339 | 54.432 | 1.303 | 52.959 | 55.432 |
| 14844 | ENSG00000105825 | TFPI2    | 1.2  | 0.0143386 | 0.0487358 | 7.154  | 1.091 | 6.266  | 8.372  | 5.928  | 0.404 | 5.462  | 6.182  |
| 14845 | ENSG00000106327 | TFR2     | -1.3 | 0.0148534 | 0.0500528 | 1.511  | 0.211 | 1.353  | 1.750  | 2.046  | 0.163 | 1.870  | 2.192  |
| 14846 | ENSG00000072274 | TFRC     | -1.1 | 0.067498  | 0.1593891 | 52.264 | 2.377 | 49.548 | 53.970 | 57.107 | 5.653 | 50.585 | 60.600 |
| 14847 | ENSG00000105329 | TGFB1    | 1.4  | 0.0011155 | 0.0064323 | 5.796  | 0.499 | 5.381  | 6.350  | 4.196  | 0.557 | 3.789  | 4.830  |
| 14848 | ENSG00000140682 | TGFB111  | 1.4  | 0.0037712 | 0.0169092 | 3.153  | 0.317 | 2.789  | 3.364  | 2.334  | 0.371 | 2.039  | 2.750  |
| 14849 | ENSG00000120708 | TGFB1    | -1.3 | 0.002037  | 0.0103036 | 2.762  | 0.299 | 2.535  | 3.100  | 3.610  | 0.468 | 3.281  | 4.145  |
| 14850 | ENSG00000163513 | TGFB2    | 1.4  | 9.987E-07 | 1.902E-05 | 9.300  | 0.063 | 9.228  | 9.343  | 6.902  | 0.118 | 6.768  | 6.989  |
| 14851 | ENSG00000177426 | TGIF1    | 1.1  | 0.0110967 | 0.039616  | 53.268 | 2.752 | 50.209 | 55.542 | 50.438 | 2.428 | 48.581 | 53.186 |
| 14852 | ENSG00000198959 | TGM2     | -1.6 | 0.0121063 | 0.0425684 | 0.319  | 0.058 | 0.278  | 0.386  | 0.526  | 0.099 | 0.415  | 0.603  |
| 14854 | ENSG00000152291 | TGOLN2   | 1.1  | 0.0819869 | 0.1850339 | 51.326 | 1.863 | 49.479 | 53.204 | 49.853 | 0.791 | 48.967 | 50.487 |
| 14855 | ENSG00000137574 | TGS1     | -1.1 | 0.0789273 | 0.1796874 | 36.345 | 3.178 | 32.916 | 39.191 | 39.938 | 2.552 | 38.012 | 42.832 |
| 14856 | ENSG00000131931 | THAP1    | -1.2 | 0.0241425 | 0.0729798 | 12.132 | 0.698 | 11.522 | 12.893 | 14.658 | 1.193 | 13.562 | 15.929 |
| 14857 | ENSG00000137492 | THAP12   | 1.1  | 0.0218201 | 0.0675038 | 21.620 | 0.898 | 20.926 | 22.635 | 20.326 | 0.867 | 19.751 | 21.323 |
| 14858 | ENSG00000253919 | THAP12P7 | 1.2  | 0.0327122 | 0.092287  | 10.183 | 0.649 | 9.618  | 10.892 | 8.756  | 0.530 | 8.199  | 9.254  |
| 14859 | ENSG00000176946 | THAP4    | 1.1  | 0.058316  | 0.1425654 | 50.786 | 0.188 | 50.575 | 50.937 | 48.406 | 1.024 | 47.572 | 49.549 |
| 14860 | ENSG00000168152 | THAP9    | -1.1 | 0.0400519 | 0.1070801 | 13.862 | 0.736 | 13.267 | 14.685 | 15.733 | 0.965 | 14.639 | 16.463 |
| 14861 | ENSG00000137801 | THBS1    | 1.3  | 0.0185094 | 0.0592898 | 63.116 | 8.443 | 54.121 | 70.869 | 49.095 | 8.672 | 40.597 | 57.931 |
| 14862 | ENSG00000186340 | THBS2    | -2.2 | 6.99E-13  | 7.78E-11  | 8.208  | 1.616 | 6.754  | 9.948  | 18.235 | 0.860 | 17.261 | 18.888 |
| 14863 | ENSG00000113296 | THBS4    | 1.3  | 2.8E-05   | 0.0003155 | 19.271 | 1.656 | 17.378 | 20.447 | 15.607 | 1.180 | 14.496 | 16.846 |
| 14864 | ENSG00000130193 | THEM6    | 1.3  | 0.0310173 | 0.0885843 | 3.845  | 0.352 | 3.463  | 4.156  | 3.109  | 0.412 | 2.847  | 3.584  |
| 14865 | ENSG00000130775 | THEMIS2  | 1.2  | 0.036924  | 0.1006602 | 6.443  | 0.164 | 6.294  | 6.618  | 5.646  | 0.360 | 5.237  | 5.915  |
| 14866 | ENSG00000113272 | THG1L    | -1.2 | 0.00083   | 0.0050222 | 10.966 | 0.758 | 10.317 | 11.799 | 13.812 | 0.662 | 13.320 | 14.565 |
| 14867 | ENSG00000185875 | THNSL1   | -1.1 | 0.0237059 | 0.0720065 | 11.810 | 0.608 | 11.108 | 12.169 | 13.786 | 0.534 | 13.212 | 14.267 |
| 14868 | ENSG00000079134 | THOC1    | -1.1 | 0.0197377 | 0.062327  | 25.019 | 0.871 | 24.163 | 25.904 | 27.720 | 0.986 | 27.123 | 28.858 |
| 14869 | ENSG00000125676 | THOC2    | -1.2 | 3.251E-06 | 5.105E-05 | 30.895 | 1.033 | 30.189 | 32.080 | 37.454 | 2.006 | 36.237 | 39.769 |
| 14871 | ENSG00000100296 | THOC5    | 1.2  | 0.0036148 | 0.0163599 | 8.499  | 0.280 | 8.177  | 8.677  | 7.509  | 0.332 | 7.127  | 7.732  |
| 14872 | ENSG00000172009 | THOP1    | -1.1 | 0.0730776 | 0.1693561 | 20.638 | 0.266 | 20.394 | 20.922 | 22.485 | 1.157 | 21.286 | 23.594 |



|       | A               | B        | C    | D         | E         | F       | G     | H       | I       | J       | K     | L       | M       |
|-------|-----------------|----------|------|-----------|-----------|---------|-------|---------|---------|---------|-------|---------|---------|
| 14873 | ENSG00000126351 | THRA     | -1.1 | 0.0829336 | 0.1865483 | 4.230   | 0.424 | 3.906   | 4.710   | 4.882   | 0.516 | 4.307   | 5.304   |
| 14874 | ENSG00000151090 | THRB     | -1.2 | 0.0341905 | 0.0953695 | 1.774   | 0.163 | 1.608   | 1.934   | 2.192   | 0.113 | 2.101   | 2.319   |
| 14875 | ENSG00000187720 | THSD4    | -1.1 | 0.0761873 | 0.1745302 | 2.057   | 0.271 | 1.891   | 2.370   | 2.363   | 0.102 | 2.246   | 2.424   |
| 14877 | ENSG00000005108 | THSD7A   | 1.8  | 0.0003573 | 0.0025434 | 0.659   | 0.136 | 0.504   | 0.757   | 0.375   | 0.077 | 0.286   | 0.426   |
| 14878 | ENSG00000144229 | THSD7B   | 1.7  | 0.0009999 | 0.0058701 | 0.861   | 0.163 | 0.749   | 1.048   | 0.505   | 0.121 | 0.368   | 0.592   |
| 14879 | ENSG00000259431 | THTPA    | -1.2 | 0.0256489 | 0.0764406 | 8.787   | 0.192 | 8.673   | 9.009   | 10.491  | 0.453 | 10.052  | 10.957  |
| 14880 | ENSG00000066654 | THUMPD1  | -1.2 | 1.127E-05 | 0.0001476 | 45.308  | 0.712 | 44.486  | 45.720  | 53.731  | 2.174 | 51.862  | 56.117  |
| 14881 | ENSG00000134077 | THUMPD3  | 1.1  | 0.0850164 | 0.1898946 | 37.597  | 1.163 | 36.299  | 38.545  | 36.111  | 2.071 | 34.807  | 38.499  |
| 14883 | ENSG00000154096 | THY1     | 1.2  | 1.317E-07 | 3.464E-06 | 131.979 | 4.473 | 126.844 | 135.030 | 113.394 | 5.379 | 109.457 | 119.523 |
| 14884 | ENSG00000116001 | TIA1     | 1.1  | 0.0311165 | 0.0888374 | 90.100  | 1.279 | 89.119  | 91.546  | 85.790  | 5.266 | 80.046  | 90.390  |
| 14885 | ENSG00000221995 | TIAF1    | 1.4  | 0.0683534 | 0.1608742 | 0.953   | 0.042 | 0.913   | 0.997   | 0.715   | 0.142 | 0.625   | 0.879   |
| 14886 | ENSG00000151923 | TIAL1    | -1.1 | 0.0013786 | 0.0075656 | 47.291  | 0.811 | 46.450  | 48.068  | 53.702  | 2.725 | 51.757  | 56.816  |
| 14887 | ENSG00000156299 | TIAM1    | 1.1  | 0.0377779 | 0.1023609 | 11.807  | 0.160 | 11.672  | 11.983  | 11.079  | 0.786 | 10.330  | 11.896  |
| 14888 | ENSG00000146426 | TIAM2    | -1.4 | 3.371E-07 | 7.724E-06 | 3.129   | 0.184 | 3.010   | 3.342   | 4.562   | 0.413 | 4.286   | 5.036   |
| 14889 | ENSG00000066056 | TIE1     | -1.7 | 8.583E-05 | 0.0007972 | 0.782   | 0.086 | 0.684   | 0.846   | 1.350   | 0.134 | 1.206   | 1.472   |
| 14890 | ENSG00000173825 | TIGD3    | -1.5 | 0.0617671 | 0.1488131 | 1.301   | 0.522 | 0.734   | 1.761   | 1.958   | 0.227 | 1.710   | 2.157   |
| 14891 | ENSG00000164296 | TIGD6    | -1.2 | 0.0959714 | 0.2072742 | 1.862   | 0.080 | 1.782   | 1.942   | 2.326   | 0.514 | 1.753   | 2.745   |
| 14892 | ENSG00000111602 | TIMELESS | 1.1  | 0.0001071 | 0.000954  | 89.993  | 3.819 | 87.303  | 94.364  | 81.260  | 2.425 | 79.399  | 84.003  |
| 14893 | ENSG00000132286 | TIMM10B  | 1.1  | 0.0110265 | 0.0394272 | 31.787  | 1.822 | 30.656  | 33.889  | 28.983  | 1.564 | 27.721  | 30.732  |
| 14895 | ENSG00000099800 | TIMM13   | -1.1 | 0.0147492 | 0.0497794 | 92.844  | 1.517 | 91.130  | 94.012  | 103.057 | 0.613 | 102.687 | 103.764 |
| 14896 | ENSG00000126768 | TIMM17B  | -1.2 | 0.0003931 | 0.0027577 | 35.004  | 2.124 | 33.619  | 37.450  | 41.907  | 1.538 | 40.191  | 43.159  |
| 14897 | ENSG00000142444 | TIMM29   | -1.2 | 0.0026209 | 0.0126683 | 18.498  | 0.595 | 18.081  | 19.179  | 22.949  | 2.540 | 20.673  | 25.689  |
| 14898 | ENSG00000224908 | TIMM8BP2 | 1.9  | 0.0253809 | 0.075829  | 8.463   | 1.548 | 6.765   | 9.794   | 4.580   | 2.665 | 1.547   | 6.543   |
| 14899 | ENSG00000100575 | TIMM9    | -1.1 | 0.0334663 | 0.0937908 | 51.768  | 4.609 | 49.066  | 57.089  | 58.831  | 5.159 | 53.906  | 64.196  |
| 14900 | ENSG00000113845 | TIMMDC1  | 1.2  | 2.332E-05 | 0.0002711 | 49.842  | 1.697 | 48.381  | 51.703  | 42.695  | 1.604 | 41.263  | 44.428  |
| 14902 | ENSG00000102265 | TIMP1    | 1.2  | 0.0002399 | 0.0018482 | 76.959  | 7.014 | 70.421  | 84.368  | 65.465  | 0.913 | 64.447  | 66.211  |
| 14903 | ENSG00000035862 | TIMP2    | 1.1  | 0.0044954 | 0.01948   | 18.061  | 0.867 | 17.116  | 18.818  | 16.320  | 0.663 | 15.702  | 17.020  |
| 14904 | ENSG00000100234 | TIMP3    | 1.4  | 0.0016336 | 0.0086856 | 3.176   | 0.274 | 2.887   | 3.431   | 2.270   | 0.636 | 1.788   | 2.990   |
| 14905 | ENSG00000157150 | TIMP4    | 1.8  | 0.0219436 | 0.067815  | 1.674   | 0.655 | 1.174   | 2.416   | 0.969   | 0.134 | 0.847   | 1.113   |
| 14907 | ENSG00000092330 | TINF2    | -1.2 | 0.0049347 | 0.0209384 | 21.672  | 2.335 | 19.980  | 24.336  | 25.731  | 1.279 | 24.492  | 27.047  |
| 14908 | ENSG00000163659 | TIPARP   | 1.4  | 5.42E-05  | 0.0005463 | 6.153   | 0.397 | 5.908   | 6.611   | 4.622   | 0.220 | 4.369   | 4.761   |
| 14909 | ENSG00000143155 | TIPRL    | 1.1  | 0.0664623 | 0.1575219 | 46.297  | 1.983 | 44.293  | 48.258  | 44.216  | 0.824 | 43.455  | 45.091  |
| 14910 | ENSG00000150455 | TIRAP    | 1.2  | 0.0916682 | 0.2009571 | 3.836   | 0.386 | 3.577   | 4.279   | 3.308   | 0.356 | 3.071   | 3.718   |
| 14911 | ENSG00000137221 | TJAP1    | -1.1 | 0.0297748 | 0.0857452 | 9.384   | 0.843 | 8.432   | 10.038  | 10.729  | 0.162 | 10.546  | 10.858  |
| 14912 | ENSG00000104067 | TJP1     | 1.1  | 0.0002212 | 0.001732  | 60.997  | 1.353 | 59.435  | 61.824  | 56.275  | 0.683 | 55.614  | 56.978  |
| 14913 | ENSG00000105289 | TJP3     | -1.4 | 9.2E-08   | 2.534E-06 | 14.181  | 0.818 | 13.278  | 14.874  | 19.814  | 0.458 | 19.518  | 20.341  |
| 14915 | ENSG00000149476 | TKFC     | -1.2 | 0.0001496 | 0.0012567 | 10.401  | 0.460 | 10.126  | 10.932  | 12.730  | 0.830 | 11.774  | 13.264  |
| 14917 | ENSG00000163931 | TKT      | 1.1  | 0.0135609 | 0.046562  | 300.473 | 1.326 | 299.467 | 301.975 | 289.270 | 4.820 | 285.623 | 294.735 |
| 14918 | ENSG00000065717 | TLE2     | -1.4 | 0.0013755 | 0.007551  | 2.262   | 0.074 | 2.177   | 2.305   | 3.225   | 0.143 | 3.060   | 3.308   |
| 14920 | ENSG00000140332 | TLE3     | -1.2 | 0.0003246 | 0.0023544 | 12.081  | 1.064 | 10.857  | 12.781  | 14.378  | 0.307 | 14.081  | 14.694  |
| 14921 | ENSG00000106829 | TLE4     | -1.1 | 0.0014456 | 0.0078447 | 16.428  | 0.285 | 16.122  | 16.687  | 19.092  | 0.971 | 18.115  | 20.058  |

|       | A               | B       | C    | D         | E         | F       | G     | H       | I       | J       | K     | L       | M       |
|-------|-----------------|---------|------|-----------|-----------|---------|-------|---------|---------|---------|-------|---------|---------|
| 14922 | ENSG00000104953 | TLE6    | -1.5 | 0.0429129 | 0.1128048 | 0.486   | 0.105 | 0.367   | 0.566   | 0.769   | 0.150 | 0.680   | 0.942   |
| 14923 | ENSG00000095587 | TLL2    | -1.3 | 0.1067828 | 0.2236278 | 0.673   | 0.238 | 0.399   | 0.823   | 0.882   | 0.150 | 0.710   | 0.983   |
| 14924 | ENSG00000137076 | TLN1    | 1.1  | 0.0004008 | 0.0028004 | 52.761  | 1.699 | 50.934  | 54.295  | 48.383  | 2.290 | 46.028  | 50.601  |
| 14925 | ENSG00000137462 | TLR2    | 1.5  | 0.0008827 | 0.0052791 | 2.293   | 0.291 | 1.969   | 2.533   | 1.519   | 0.156 | 1.341   | 1.627   |
| 14926 | ENSG00000164342 | TLR3    | -1.7 | 0.0004427 | 0.0030237 | 0.748   | 0.207 | 0.510   | 0.878   | 1.319   | 0.287 | 1.062   | 1.628   |
| 14928 | ENSG00000187554 | TLR5    | -1.6 | 0.0145658 | 0.0493293 | 0.696   | 0.181 | 0.545   | 0.897   | 1.133   | 0.102 | 1.050   | 1.247   |
| 14931 | ENSG00000162604 | TM2D1   | -1.1 | 0.1038007 | 0.2190917 | 8.513   | 0.498 | 7.950   | 8.892   | 9.639   | 1.086 | 8.953   | 10.892  |
| 14932 | ENSG00000169490 | TM2D2   | 1.1  | 0.0875201 | 0.1939756 | 16.439  | 1.072 | 15.203  | 17.086  | 15.362  | 1.218 | 14.110  | 16.543  |
| 14933 | ENSG00000149809 | TM7SF2  | 1.1  | 0.0676996 | 0.1597828 | 21.660  | 0.700 | 20.852  | 22.077  | 19.981  | 2.461 | 17.139  | 21.417  |
| 14934 | ENSG00000064115 | TM7SF3  | 1.2  | 3.065E-05 | 0.0003399 | 91.307  | 3.916 | 87.636  | 95.430  | 80.637  | 4.766 | 76.811  | 85.976  |
| 14935 | ENSG00000198498 | TMA16   | 1.1  | 0.0923062 | 0.2018846 | 51.537  | 1.843 | 49.962  | 53.563  | 49.638  | 1.040 | 48.438  | 50.263  |
| 14937 | ENSG00000232112 | TMA7    | -1.1 | 0.0206583 | 0.0647026 | 141.382 | 7.095 | 137.188 | 149.574 | 156.834 | 2.959 | 153.447 | 158.913 |
| 14939 | ENSG00000135926 | TMBIM1  | 1.1  | 0.0073081 | 0.0284559 | 18.016  | 0.509 | 17.608  | 18.587  | 16.260  | 0.605 | 15.597  | 16.781  |
| 14940 | ENSG00000139644 | TMBIM6  | 1.1  | 0.0055306 | 0.0228591 | 256.480 | 3.537 | 254.354 | 260.563 | 245.151 | 4.806 | 239.602 | 247.929 |
| 14941 | ENSG00000167608 | TMC4    | -1.5 | 0.0001205 | 0.0010521 | 3.717   | 0.495 | 3.158   | 4.101   | 5.676   | 0.716 | 5.014   | 6.436   |
| 14942 | ENSG00000141524 | TMC6    | 1.2  | 5.088E-05 | 0.000519  | 17.172  | 1.685 | 15.399  | 18.752  | 14.494  | 0.792 | 13.995  | 15.407  |
| 14943 | ENSG00000170537 | TMC7    | 1.2  | 0.0599379 | 0.1455044 | 3.240   | 0.201 | 3.064   | 3.459   | 2.794   | 0.344 | 2.575   | 3.190   |
| 14944 | ENSG00000167895 | TMC8    | 1.9  | 0.0006146 | 0.0039586 | 1.257   | 0.438 | 0.947   | 1.758   | 0.690   | 0.173 | 0.569   | 0.888   |
|       |                 | TMCC1-  |      |           |           |         |       |         |         |         |       |         |         |
| 14945 | ENSG00000271270 | AS1     | 1.3  | 0.091865  | 0.201258  | 1.356   | 0.060 | 1.289   | 1.406   | 1.090   | 0.136 | 0.981   | 1.243   |
| 14947 | ENSG00000143183 | TMCO1   | 1.1  | 0.0480559 | 0.123203  | 24.825  | 1.070 | 23.773  | 25.912  | 23.393  | 1.756 | 21.538  | 25.030  |
| 14948 | ENSG00000150403 | TMCO3   | 1.1  | 0.0208736 | 0.0652803 | 16.218  | 0.631 | 15.748  | 16.936  | 15.300  | 0.290 | 15.132  | 15.635  |
| 14949 | ENSG00000162542 | TMCO4   | -1.4 | 0.0023706 | 0.0116516 | 2.642   | 0.424 | 2.389   | 3.132   | 3.776   | 0.198 | 3.549   | 3.911   |
| 14950 | ENSG00000099203 | TMED1   | 1.1  | 0.0238624 | 0.072353  | 29.892  | 2.304 | 27.616  | 32.223  | 26.710  | 1.911 | 25.148  | 28.840  |
| 14951 | ENSG00000086598 | TMED2   | -1.2 | 5.402E-06 | 7.937E-05 | 120.753 | 4.953 | 115.492 | 125.325 | 143.072 | 1.922 | 141.432 | 145.187 |
| 14952 | ENSG00000166557 | TMED3   | -1.1 | 0.0013052 | 0.0072498 | 5.807   | 0.176 | 5.670   | 6.006   | 6.790   | 0.335 | 6.485   | 7.149   |
| 14953 | ENSG00000134970 | TMED7   | 1.1  | 0.0090046 | 0.0334345 | 53.517  | 1.073 | 52.799  | 54.751  | 48.459  | 3.811 | 45.665  | 52.800  |
| 14954 | ENSG00000091947 | TMEM101 | -1.1 | 0.0505486 | 0.1280983 | 20.642  | 1.633 | 19.351  | 22.478  | 23.328  | 0.932 | 22.771  | 24.405  |
|       |                 | TMEM106 |      |           |           |         |       |         |         |         |       |         |         |
| 14955 | ENSG00000106460 | B       | -1.1 | 0.0574934 | 0.1410891 | 19.866  | 0.620 | 19.317  | 20.538  | 21.828  | 1.675 | 20.741  | 23.757  |
| 14956 | ENSG00000179029 | TMEM107 | 1.3  | 0.018549  | 0.0593941 | 4.652   | 0.510 | 4.064   | 4.948   | 3.745   | 0.112 | 3.633   | 3.857   |
| 14959 | ENSG00000144868 | TMEM108 | -1.2 | 0.033467  | 0.0937908 | 2.668   | 0.514 | 2.138   | 3.165   | 3.241   | 0.086 | 3.152   | 3.323   |
| 14960 | ENSG00000178307 | TMEM11  | -1.2 | 0.0017791 | 0.0092728 | 13.680  | 0.780 | 12.832  | 14.367  | 16.568  | 0.365 | 16.192  | 16.921  |
| 14961 | ENSG00000126062 | TMEM115 | 1.1  | 0.0995525 | 0.2125837 | 22.808  | 0.675 | 22.107  | 23.454  | 21.149  | 2.142 | 18.762  | 22.903  |
| 14963 | ENSG00000139173 | TMEM117 | 1.4  | 0.070411  | 0.1645064 | 1.350   | 0.208 | 1.116   | 1.516   | 0.997   | 0.276 | 0.679   | 1.182   |
| 14965 | ENSG00000152558 | TMEM123 | 1.2  | 0.000249  | 0.0019033 | 92.907  | 4.220 | 89.407  | 97.592  | 82.043  | 5.564 | 77.812  | 88.346  |
|       |                 | TMEM126 |      |           |           |         |       |         |         |         |       |         |         |
| 14966 | ENSG00000171204 | B       | 1.2  | 2.35E-05  | 0.0002726 | 69.618  | 4.958 | 66.104  | 75.289  | 59.547  | 0.591 | 58.880  | 60.009  |
| 14967 | ENSG00000168936 | TMEM129 | -1.2 | 0.0001352 | 0.0011548 | 34.551  | 1.547 | 32.766  | 35.517  | 41.910  | 3.685 | 39.073  | 46.075  |
| 14969 | ENSG00000166448 | TMEM130 | 1.7  | 3.075E-08 | 9.811E-07 | 6.428   | 0.671 | 5.668   | 6.939   | 3.760   | 0.181 | 3.555   | 3.897   |

|       | A               | B                | C    | D         | E         | F      | G     | H      | I       | J      | K     | L      | M      |
|-------|-----------------|------------------|------|-----------|-----------|--------|-------|--------|---------|--------|-------|--------|--------|
| 14970 | ENSG00000181234 | TMEM132<br>C     | -1.8 | 0.0031658 | 0.0147256 | 0.519  | 0.128 | 0.418  | 0.663   | 0.939  | 0.230 | 0.675  | 1.099  |
| 14971 | ENSG00000181291 | TMEM132<br>E     | -4.1 | 5.302E-06 | 7.818E-05 | 0.173  | 0.128 | 0.030  | 0.276   | 0.735  | 0.083 | 0.640  | 0.791  |
| 14972 | ENSG00000172663 | TMEM134          | 1.2  | 0.0281281 | 0.0821785 | 7.725  | 0.594 | 7.282  | 8.400   | 6.811  | 0.516 | 6.484  | 7.406  |
| 14973 | ENSG00000166575 | TMEM135          | 1.2  | 2.373E-06 | 3.923E-05 | 38.474 | 1.158 | 37.143 | 39.245  | 32.736 | 1.132 | 32.026 | 34.041 |
| 14974 | ENSG00000149483 | TMEM138          | -1.2 | 0.0007031 | 0.0043914 | 8.167  | 0.234 | 7.913  | 8.373   | 10.069 | 0.389 | 9.810  | 10.516 |
| 14975 | ENSG00000178826 | TMEM139          | 2    | 0.002412  | 0.0117939 | 1.617  | 0.510 | 1.209  | 2.190   | 0.828  | 0.131 | 0.727  | 0.976  |
| 14977 | ENSG00000164124 | TMEM144          | 1.2  | 0.0485051 | 0.12411   | 2.100  | 0.208 | 1.949  | 2.337   | 1.821  | 0.207 | 1.675  | 2.058  |
| 14978 | ENSG00000167619 | TMEM145          | -1.6 | 0.0036766 | 0.0165906 | 1.926  | 0.420 | 1.623  | 2.405   | 3.060  | 0.396 | 2.647  | 3.436  |
| 14979 | ENSG00000105677 | TMEM147          | 1.1  | 0.0037627 | 0.0168801 | 96.333 | 4.232 | 92.383 | 100.799 | 87.774 | 6.681 | 83.277 | 95.450 |
| 14980 | ENSG00000137210 | TMEM14B          | 1.1  | 0.0138918 | 0.0474842 | 26.773 | 0.275 | 26.510 | 27.059  | 24.917 | 0.974 | 23.847 | 25.752 |
| 14981 | ENSG00000178233 | TMEM151<br>B     | 1.2  | 0.0062109 | 0.0250286 | 7.491  | 1.030 | 6.302  | 8.092   | 6.393  | 0.177 | 6.247  | 6.589  |
| 14984 | ENSG00000170006 | TMEM154          | 1.2  | 0.1204614 | 0.2435289 | 0.571  | 0.014 | 0.561  | 0.587   | 0.476  | 0.076 | 0.432  | 0.563  |
| 14985 | ENSG00000249992 | TMEM158          | -1.3 | 0.0001031 | 0.0009258 | 25.086 | 1.898 | 22.965 | 26.625  | 33.508 | 5.489 | 27.615 | 38.474 |
| 14986 | ENSG00000011638 | TMEM159          | -1.4 | 4.095E-10 | 2.217E-08 | 28.522 | 1.896 | 26.423 | 30.112  | 42.202 | 1.065 | 41.102 | 43.227 |
| 14987 | ENSG00000164180 | TMEM161<br>B     | -1.1 | 0.084748  | 0.189537  | 14.415 | 0.743 | 13.900 | 15.267  | 15.823 | 1.356 | 14.999 | 17.388 |
| 14988 | ENSG00000247828 | TMEM161<br>B-AS1 | -1.2 | 0.0020087 | 0.010201  | 9.365  | 0.271 | 9.080  | 9.619   | 11.597 | 1.073 | 10.358 | 12.256 |
| 14989 | ENSG00000157600 | TMEM164          | 1.1  | 0.0513979 | 0.129687  | 24.010 | 1.215 | 22.608 | 24.754  | 22.689 | 2.005 | 21.041 | 24.922 |
| 14990 | ENSG00000163449 | TMEM169          | 1.5  | 0.0039376 | 0.0175623 | 2.110  | 0.178 | 1.913  | 2.259   | 1.450  | 0.264 | 1.199  | 1.724  |
| 14991 | ENSG00000166822 | TMEM170<br>A     | -1.1 | 0.1224758 | 0.2466604 | 36.019 | 0.776 | 35.480 | 36.908  | 38.843 | 1.198 | 37.556 | 39.925 |
| 14992 | ENSG00000205269 | TMEM170<br>B     | 1.6  | 1.15E-11  | 9.504E-10 | 11.142 | 0.550 | 10.523 | 11.573  | 7.241  | 0.543 | 6.630  | 7.668  |
| 14994 | ENSG00000144120 | TMEM177          | -1.1 | 0.0342411 | 0.0953913 | 19.630 | 1.614 | 18.256 | 21.407  | 22.474 | 1.429 | 21.602 | 24.123 |
| 14995 | ENSG00000170417 | TMEM182          | 1.2  | 0.118622  | 0.2408016 | 1.508  | 0.108 | 1.386  | 1.595   | 1.290  | 0.241 | 1.081  | 1.553  |
| 14996 | ENSG00000163444 | TMEM183<br>A     | -1.1 | 0.0244098 | 0.0736036 | 41.373 | 1.269 | 39.911 | 42.180  | 45.792 | 2.396 | 43.737 | 48.423 |
| 14997 | ENSG00000198792 | TMEM184<br>B     | -1.1 | 0.0274132 | 0.0804394 | 25.782 | 0.131 | 25.667 | 25.925  | 28.913 | 3.364 | 25.642 | 32.362 |

|       | A               | B               | C    | D         | E         | F      | G     | H      | I      | J       | K     | L      | M       |
|-------|-----------------|-----------------|------|-----------|-----------|--------|-------|--------|--------|---------|-------|--------|---------|
| 14998 | ENSG00000177854 | TMEM187         | -1.4 | 0.0018016 | 0.0093642 | 5.874  | 0.745 | 5.111  | 6.600  | 8.441   | 0.809 | 7.668  | 9.281   |
| 14999 | ENSG00000240849 | TMEM189         | 1.1  | 0.0077887 | 0.0300001 | 10.167 | 0.242 | 9.997  | 10.445 | 9.145   | 0.518 | 8.648  | 9.682   |
| 15000 | ENSG00000206140 | TMEM191<br>C    | 1.3  | 0.0713332 | 0.166133  | 1.149  | 0.073 | 1.092  | 1.231  | 0.880   | 0.194 | 0.660  | 1.023   |
| 15001 | ENSG00000170088 | TMEM192         | 1.2  | 0.0027367 | 0.0131122 | 7.719  | 0.023 | 7.696  | 7.742  | 6.811   | 0.344 | 6.415  | 7.024   |
| 15002 | ENSG00000182796 | TMEM198<br>B    | -1.1 | 0.065269  | 0.1552595 | 12.512 | 0.958 | 11.451 | 13.313 | 14.177  | 1.114 | 13.133 | 15.350  |
| 15003 | ENSG00000135048 | TMEM2           | -1.4 | 2.686E-10 | 1.572E-08 | 19.725 | 1.476 | 18.070 | 20.906 | 27.310  | 0.762 | 26.442 | 27.865  |
| 15004 | ENSG00000253304 | TMEM200<br>B    | 1.5  | 2.285E-07 | 5.52E-06  | 16.277 | 0.443 | 15.843 | 16.728 | 11.163  | 1.215 | 9.928  | 12.358  |
| 15007 | ENSG00000206432 | TMEM200<br>C    | 1.3  | 0.001274  | 0.0071231 | 2.307  | 0.181 | 2.179  | 2.514  | 1.790   | 0.165 | 1.647  | 1.970   |
| 15008 | ENSG00000168701 | TMEM208         | -1.1 | 0.0249545 | 0.0748724 | 24.895 | 0.533 | 24.306 | 25.345 | 28.900  | 0.547 | 28.269 | 29.231  |
| 15009 | ENSG00000146842 | TMEM209         | 1.1  | 0.0373789 | 0.1015687 | 19.133 | 1.566 | 17.405 | 20.458 | 17.743  | 0.819 | 16.876 | 18.503  |
| 15011 | ENSG00000150433 | TMEM218         | -1.2 | 0.0025439 | 0.0123385 | 8.293  | 0.825 | 7.354  | 8.901  | 10.249  | 0.947 | 9.169  | 10.937  |
| 15012 | ENSG00000187824 | TMEM220         | 1.4  | 0.0019    | 0.0097824 | 3.139  | 0.276 | 2.822  | 3.325  | 2.234   | 0.313 | 1.948  | 2.569   |
| 15013 | ENSG00000263400 | TMEM220-<br>AS1 | -1.6 | 0.0002951 | 0.0021831 | 3.523  | 0.309 | 3.260  | 3.863  | 5.737   | 1.062 | 4.836  | 6.907   |
| 15015 | ENSG00000186501 | TMEM222         | 1.2  | 0.0062036 | 0.025011  | 8.761  | 0.863 | 8.180  | 9.753  | 7.451   | 0.128 | 7.373  | 7.598   |
| 15016 | ENSG00000205084 | TMEM231         | 1.5  | 2.379E-07 | 5.723E-06 | 6.558  | 0.362 | 6.161  | 6.869  | 4.493   | 0.049 | 4.454  | 4.547   |
| 15017 | ENSG00000186952 | TMEM232         | 1.6  | 0.0002882 | 0.002142  | 1.451  | 0.178 | 1.267  | 1.621  | 0.939   | 0.215 | 0.801  | 1.187   |
| 15018 | ENSG00000205090 | TMEM240         | -1.2 | 0.0962267 | 0.2076401 | 5.549  | 0.923 | 4.818  | 6.586  | 6.933   | 0.312 | 6.573  | 7.135   |
| 15019 | ENSG00000134490 | TMEM241         | 1.1  | 0.1214214 | 0.2450596 | 6.693  | 0.162 | 6.599  | 6.880  | 6.197   | 0.079 | 6.106  | 6.250   |
| 15020 | ENSG00000215712 | TMEM242         | -1.2 | 0.0084281 | 0.0317916 | 9.590  | 0.165 | 9.411  | 9.735  | 11.438  | 0.615 | 10.868 | 12.090  |
| 15021 | ENSG00000165152 | TMEM246         | 1.2  | 0.0001086 | 0.0009643 | 19.839 | 1.183 | 18.482 | 20.657 | 16.888  | 0.844 | 16.093 | 17.774  |
| 15022 | ENSG00000153485 | TMEM251         | 1.1  | 0.0882198 | 0.1951474 | 30.928 | 2.505 | 28.141 | 32.990 | 28.457  | 1.264 | 27.078 | 29.561  |
| 15023 | ENSG00000184497 | TMEM255<br>B    | -1.7 | 0.0033774 | 0.0154884 | 0.434  | 0.148 | 0.264  | 0.527  | 0.770   | 0.178 | 0.618  | 0.966   |
| 15025 | ENSG00000205544 | TMEM256         | -1.2 | 0.0015613 | 0.0083588 | 85.595 | 6.307 | 78.312 | 89.244 | 105.255 | 9.393 | 97.488 | 115.695 |
| 15026 | ENSG00000134825 | TMEM258         | -1.1 | 0.0143593 | 0.0487766 | 50.853 | 1.507 | 49.552 | 52.503 | 56.868  | 1.822 | 55.769 | 58.971  |
| 15027 | ENSG00000182087 | TMEM259         | -1.1 | 0.0019343 | 0.0099138 | 61.099 | 2.299 | 58.458 | 62.647 | 71.363  | 5.170 | 66.728 | 76.939  |
| 15028 | ENSG00000070269 | TMEM260         | 1.1  | 0.121048  | 0.2444579 | 8.337  | 0.288 | 8.005  | 8.518  | 7.858   | 0.706 | 7.252  | 8.633   |
| 15029 | ENSG00000151135 | TMEM263         | -1.2 | 0.0008882 | 0.005301  | 14.258 | 0.507 | 13.874 | 14.833 | 17.480  | 1.523 | 15.830 | 18.831  |
| 15030 | ENSG00000157693 | TMEM268         | 1.4  | 9.906E-05 | 0.0008969 | 7.182  | 0.933 | 6.193  | 8.047  | 5.368   | 0.619 | 4.699  | 5.920   |
| 15033 | ENSG00000182107 | TMEM30B         | 1.2  | 0.000211  | 0.001662  | 12.856 | 0.958 | 11.797 | 13.662 | 10.635  | 0.232 | 10.386 | 10.844  |
| 15034 | ENSG00000126950 | TMEM35A         | -1.2 | 0.0805798 | 0.1822961 | 8.355  | 1.572 | 6.662  | 9.769  | 9.867   | 0.431 | 9.477  | 10.329  |

|       | A               | B             | C    | D         | E         | F       | G     | H       | I       | J      | K     | L      | M       |
|-------|-----------------|---------------|------|-----------|-----------|---------|-------|---------|---------|--------|-------|--------|---------|
| 15035 | ENSG00000095209 | TMEM38B       | 1.2  | 0.0122377 | 0.0429325 | 11.166  | 0.713 | 10.408  | 11.824  | 9.897  | 0.219 | 9.708  | 10.137  |
| 15036 | ENSG00000176142 | TMEM39A       | -1.1 | 0.0736036 | 0.1701731 | 21.451  | 0.094 | 21.345  | 21.525  | 23.567 | 1.451 | 22.510 | 25.221  |
| 15038 | ENSG00000163900 | TMEM41A       | 1.2  | 0.0066711 | 0.0264916 | 5.948   | 0.419 | 5.468   | 6.239   | 5.226  | 0.277 | 5.017  | 5.539   |
| 15039 | ENSG00000166471 | TMEM41B       | 1.3  | 1.001E-05 | 0.0001337 | 32.542  | 3.163 | 30.637  | 36.193  | 25.874 | 0.742 | 25.093 | 26.569  |
| 15040 | ENSG00000170876 | TMEM43        | 1.1  | 0.0326701 | 0.0922118 | 40.630  | 2.389 | 37.872  | 42.078  | 38.307 | 0.870 | 37.303 | 38.825  |
| 15041 | ENSG00000147027 | TMEM47        | 1.4  | 5.38E-12  | 4.869E-10 | 100.028 | 3.134 | 96.432  | 102.186 | 75.065 | 2.930 | 71.750 | 77.310  |
| 15042 | ENSG00000183726 | TMEM50A       | 1.1  | 0.0664469 | 0.1575219 | 80.794  | 0.763 | 79.927  | 81.365  | 78.015 | 3.194 | 74.484 | 80.703  |
| 15043 | ENSG00000126106 | TMEM53        | 1.2  | 0.1035273 | 0.2186919 | 4.577   | 0.046 | 4.549   | 4.630   | 3.981  | 0.915 | 3.375  | 5.034   |
| 15045 | ENSG00000121900 | TMEM54        | -1.2 | 0.0239425 | 0.0725387 | 15.505  | 2.042 | 13.545  | 17.620  | 18.904 | 1.126 | 17.666 | 19.867  |
| 15046 | ENSG00000155099 | TMEM55A       | 1.4  | 1.691E-09 | 7.857E-08 | 72.718  | 1.728 | 70.848  | 74.256  | 53.735 | 4.963 | 48.120 | 57.534  |
| 15047 | ENSG00000116209 | TMEM59        | -1.1 | 0.0407612 | 0.108566  | 29.563  | 0.743 | 28.760  | 30.226  | 32.279 | 0.550 | 31.708 | 32.805  |
| 15048 | ENSG00000105696 | TMEM59L       | -1.4 | 1.93E-05  | 0.000231  | 14.196  | 1.275 | 12.827  | 15.349  | 20.111 | 2.099 | 18.629 | 22.513  |
| 15049 | ENSG00000137842 | TMEM62        | 1.2  | 0.0997483 | 0.2128761 | 2.422   | 0.124 | 2.302   | 2.549   | 2.060  | 0.489 | 1.496  | 2.359   |
| 15051 | ENSG00000196187 | TMEM63A       | -1.2 | 0.0013    | 0.0072375 | 6.093   | 0.217 | 5.937   | 6.340   | 7.287  | 0.403 | 6.880  | 7.685   |
| 15052 | ENSG00000137216 | TMEM63B       | -1.2 | 0.0006528 | 0.0041532 | 27.137  | 0.761 | 26.259  | 27.611  | 32.210 | 1.960 | 30.096 | 33.966  |
| 15053 | ENSG00000165548 | TMEM63C       | -1.5 | 0.0005416 | 0.0035712 | 1.428   | 0.206 | 1.276   | 1.662   | 2.158  | 0.208 | 1.928  | 2.334   |
| 15054 | ENSG00000180694 | TMEM64        | 1.6  | 6.316E-09 | 2.508E-07 | 143.311 | 8.846 | 133.132 | 149.137 | 93.367 | 8.927 | 85.984 | 103.288 |
| 15055 | ENSG00000164953 | TMEM67        | 1.2  | 0.0107057 | 0.0385001 | 4.714   | 0.494 | 4.175   | 5.145   | 3.998  | 0.305 | 3.815  | 4.351   |
| 15057 | ENSG00000159596 | TMEM69        | -1.2 | 6.815E-06 | 9.606E-05 | 41.831  | 3.727 | 37.628  | 44.735  | 53.377 | 2.946 | 50.111 | 55.834  |
| 15058 | ENSG00000177042 | TMEM80        | -1.3 | 0.0032413 | 0.0149903 | 4.111   | 0.217 | 3.883   | 4.316   | 5.383  | 0.244 | 5.124  | 5.608   |
| 15059 | ENSG00000174529 | TMEM81        | -2   | 0.0001279 | 0.0011069 | 3.000   | 0.681 | 2.237   | 3.547   | 6.068  | 0.857 | 5.130  | 6.810   |
| 15060 | ENSG00000153214 | TMEM87B       | 1.2  | 5.056E-05 | 0.0005176 | 18.431  | 0.099 | 18.343  | 18.538  | 15.460 | 1.294 | 13.971 | 16.306  |
| 15061 | ENSG00000129925 | TMEM8A        | 1.2  | 0.0002565 | 0.001951  | 48.654  | 3.004 | 45.764  | 51.760  | 42.926 | 3.394 | 39.567 | 46.353  |
| 15062 | ENSG00000137103 | TMEM8B        | 1.1  | 0.1113705 | 0.2303926 | 8.217   | 0.478 | 7.675   | 8.576   | 7.600  | 0.114 | 7.527  | 7.731   |
| 15065 | ENSG00000177728 | TMEM94        | -1.1 | 0.0739472 | 0.1706932 | 12.789  | 0.673 | 12.256  | 13.546  | 14.116 | 0.635 | 13.418 | 14.661  |
| 15066 | ENSG00000109084 | TMEM97        | 1.2  | 3.543E-05 | 0.0003833 | 80.728  | 1.909 | 79.452  | 82.922  | 71.131 | 3.357 | 68.867 | 74.988  |
| 15068 | ENSG00000006042 | TMEM98        | 1.4  | 3.86E-11  | 2.818E-09 | 33.407  | 1.607 | 31.667  | 34.834  | 24.191 | 1.055 | 23.488 | 25.404  |
| 15069 | ENSG00000175348 | TMEM9B        | 1.2  | 0.000696  | 0.0043517 | 13.393  | 0.588 | 12.922  | 14.052  | 10.989 | 0.627 | 10.413 | 11.656  |
| 15070 | ENSG00000144747 | TMF1          | -1.1 | 0.0013446 | 0.0074196 | 16.628  | 0.665 | 15.874  | 17.129  | 19.517 | 0.524 | 18.949 | 19.982  |
| 15072 | ENSG00000185973 | TMLHE         | -1.2 | 0.0255859 | 0.0762931 | 7.932   | 0.370 | 7.510   | 8.205   | 9.482  | 0.760 | 8.659  | 10.157  |
| 15073 | ENSG00000188167 | TMPPE         | -1.3 | 0.0465704 | 0.1202695 | 1.756   | 0.232 | 1.527   | 1.991   | 2.292  | 0.175 | 2.090  | 2.399   |
| 15074 | ENSG00000087128 | TMPRSS11<br>E | 1.8  | 0.000644  | 0.0041088 | 3.300   | 1.166 | 2.439   | 4.627   | 1.869  | 0.256 | 1.598  | 2.108   |

|       | A               | B             | C    | D         | E         | F         | G       | H         | I         | J         | K       | L         | M         |
|-------|-----------------|---------------|------|-----------|-----------|-----------|---------|-----------|-----------|-----------|---------|-----------|-----------|
| 15075 | ENSG00000184012 | TMPRSS2       | -1.4 | 5.508E-06 | 8.079E-05 | 4.295     | 0.313   | 3.934     | 4.492     | 6.347     | 0.702   | 5.636     | 7.039     |
| 15076 | ENSG00000205542 | TMSB4X        | 1.1  | 0.000825  | 0.0049975 | 2770.217  | 78.349  | 2705.936  | 2857.490  | 2576.748  | 100.396 | 2466.423  | 2662.744  |
| 15077 | ENSG00000236876 | TMSB4XP1      | 1.2  | 2.278E-05 | 0.0002659 | 873.723   | 16.044  | 856.646   | 888.481   | 732.420   | 35.364  | 711.708   | 773.253   |
| 15078 | ENSG00000230043 | TMSB4XP6      | 1.2  | 0.000128  | 0.0011069 | 1946.388  | 93.140  | 1840.815  | 2016.947  | 1688.273  | 75.259  | 1624.174  | 1771.140  |
| 15079 | ENSG00000187653 | TMSB4XP8      | 1.1  | 1.537E-05 | 0.0001899 | 14328.201 | 391.638 | 13938.592 | 14721.837 | 12924.011 | 280.778 | 12605.700 | 13136.506 |
| 15080 | ENSG00000133687 | TMTC1         | 1.3  | 9.155E-08 | 2.526E-06 | 10.245    | 0.181   | 10.114    | 10.451    | 8.157     | 0.392   | 7.767     | 8.552     |
| 15081 | ENSG00000179104 | TMTC2         | -1.2 | 0.0059753 | 0.0242992 | 3.364     | 0.242   | 3.089     | 3.544     | 4.144     | 0.117   | 4.012     | 4.231     |
| 15082 | ENSG00000125247 | TMTC4         | -1.1 | 0.0231117 | 0.0705573 | 26.610    | 0.882   | 25.652    | 27.388    | 29.507    | 0.947   | 28.926    | 30.599    |
| 15083 | ENSG00000164897 | TMUB1         | -1.1 | 0.05609   | 0.13857   | 21.109    | 2.169   | 18.630    | 22.664    | 24.320    | 2.669   | 21.843    | 27.146    |
| 15084 | ENSG00000168591 | TMUB2         | -1.2 | 0.0020798 | 0.0104657 | 11.614    | 0.581   | 11.033    | 12.195    | 14.216    | 0.422   | 13.927    | 14.700    |
| 15085 | ENSG00000213593 | TMX2          | 1.2  | 6.729E-05 | 0.0006545 | 69.704    | 2.347   | 67.063    | 71.554    | 60.384    | 1.714   | 58.440    | 61.677    |
| 15086 | ENSG00000166479 | TMX3          | 1.1  | 0.0007068 | 0.0044065 | 23.691    | 1.137   | 22.435    | 24.649    | 21.226    | 0.417   | 20.745    | 21.494    |
| 15087 | ENSG00000125827 | TMX4          | 1.2  | 0.0040341 | 0.0178936 | 8.429     | 0.254   | 8.191     | 8.696     | 7.325     | 0.337   | 6.964     | 7.631     |
| 15088 | ENSG00000041982 | TNC           | 1.6  | 7.529E-07 | 1.514E-05 | 3.900     | 0.573   | 3.250     | 4.336     | 2.549     | 0.348   | 2.148     | 2.772     |
| 15089 | ENSG00000109079 | TNFAIP1       | 1.1  | 0.0629172 | 0.1511748 | 15.619    | 1.480   | 13.933    | 16.703    | 14.496    | 0.150   | 14.336    | 14.633    |
| 15090 | ENSG00000185215 | TNFAIP2       | 1.2  | 0.0010071 | 0.00591   | 11.851    | 0.260   | 11.597    | 12.117    | 10.135    | 0.258   | 9.851     | 10.354    |
| 15091 | ENSG00000145779 | TNFAIP8       | -1.1 | 0.0118722 | 0.0418495 | 6.733     | 0.414   | 6.431     | 7.204     | 7.853     | 0.650   | 7.254     | 8.544     |
| 15092 | ENSG00000185361 | TNFAIP8L1     | -1.2 | 0.0005343 | 0.0035339 | 7.533     | 0.779   | 6.637     | 8.050     | 9.443     | 0.217   | 9.196     | 9.600     |
| 15093 | ENSG00000120889 | TNFRSF10<br>B | 1.1  | 0.0062149 | 0.0250385 | 130.727   | 10.033  | 121.025   | 141.061   | 120.624   | 8.551   | 111.281   | 128.061   |
| 15094 | ENSG00000173535 | TNFRSF10<br>C | 1.1  | 0.0598884 | 0.1454479 | 11.153    | 0.532   | 10.784    | 11.763    | 9.935     | 0.884   | 8.993     | 10.744    |
| 15095 | ENSG00000006327 | TNFRSF12<br>A | 1.4  | 2.419E-09 | 1.074E-07 | 97.650    | 8.292   | 90.041    | 106.488   | 71.819    | 5.314   | 66.473    | 77.099    |
| 15096 | ENSG00000067182 | TNFRSF1A      | 1.2  | 0.0045147 | 0.0195437 | 24.421    | 1.530   | 23.004    | 26.044    | 21.671    | 2.155   | 19.710    | 23.977    |
| 15097 | ENSG00000215788 | TNFRSF25      | -1.2 | 0.0077139 | 0.0297661 | 4.812     | 0.539   | 4.221     | 5.276     | 6.138     | 0.411   | 5.665     | 6.407     |
| 15098 | ENSG00000120949 | TNFRSF8       | 1.4  | 4.949E-06 | 7.368E-05 | 12.211    | 2.120   | 9.765     | 13.517    | 8.733     | 0.422   | 8.393     | 9.205     |
| 15099 | ENSG00000125657 | TNFRSF9       | -1.5 | 0.0085418 | 0.0321015 | 4.770     | 1.399   | 3.221     | 5.941     | 7.341     | 2.466   | 4.617     | 9.422     |
| 15100 | ENSG00000154310 | TNIK          | 1.1  | 0.0001411 | 0.0011955 | 34.465    | 1.672   | 33.492    | 36.396    | 30.984    | 0.449   | 30.507    | 31.397    |
| 15101 | ENSG00000168884 | TNIP2         | -1.1 | 0.062877  | 0.151121  | 23.693    | 0.440   | 23.185    | 23.966    | 26.566    | 2.260   | 23.995    | 28.240    |
| 15103 | ENSG00000061938 | TNK2          | -1.3 | 0.0005639 | 0.0036907 | 6.267     | 0.233   | 6.107     | 6.535     | 8.155     | 1.037   | 6.983     | 8.957     |
| 15104 | ENSG00000149115 | TNKS1BP1      | 1.1  | 0.0001348 | 0.0011523 | 51.135    | 2.979   | 47.769    | 53.434    | 45.573    | 3.312   | 41.926    | 48.392    |
| 15105 | ENSG00000129991 | TNNI3         | -1.2 | 0.004285  | 0.0187571 | 17.284    | 0.264   | 17.069    | 17.579    | 21.281    | 0.963   | 20.310    | 22.235    |

|       | A               | B          | C    | D         | E         | F       | G      | H       | I       | J       | K      | L       | M       |
|-------|-----------------|------------|------|-----------|-----------|---------|--------|---------|---------|---------|--------|---------|---------|
| 15106 | ENSG00000105048 | TNNT1      | -1.2 | 0.0016902 | 0.0089304 | 58.835  | 4.856  | 53.250  | 62.063  | 69.352  | 2.461  | 66.570  | 71.247  |
| 15107 | ENSG00000083312 | TNPO1      | -1.1 | 0.0019767 | 0.0100789 | 98.213  | 4.144  | 93.787  | 102.001 | 109.851 | 4.756  | 105.281 | 114.774 |
| 15108 | ENSG00000105576 | TNPO2      | -1.1 | 0.1174013 | 0.239201  | 33.778  | 1.362  | 32.789  | 35.332  | 36.254  | 1.265  | 35.505  | 37.715  |
| 15111 | ENSG00000090905 | TNRC6A     | -1.1 | 0.0540605 | 0.1348561 | 34.328  | 0.258  | 34.030  | 34.478  | 37.286  | 0.873  | 36.544  | 38.248  |
| 15112 | ENSG00000078687 | TNRC6C     | -1.2 | 4.917E-05 | 0.0005062 | 9.548   | 0.952  | 8.956   | 10.647  | 11.834  | 0.711  | 11.252  | 12.626  |
| 15113 | ENSG00000204282 | TNRC6C-AS1 | 1.5  | 0.0074941 | 0.0290574 | 1.526   | 0.230  | 1.275   | 1.726   | 1.011   | 0.194  | 0.888   | 1.235   |
| 15114 | ENSG00000079308 | TNS1       | -1.3 | 0.003682  | 0.0166063 | 1.479   | 0.155  | 1.335   | 1.643   | 1.903   | 0.185  | 1.702   | 2.066   |
| 15117 | ENSG00000111077 | TNS2       | -1.3 | 0.0820071 | 0.1850549 | 0.622   | 0.110  | 0.548   | 0.748   | 0.817   | 0.223  | 0.680   | 1.075   |
| 15120 | ENSG00000136205 | TNS3       | -1.4 | 7.071E-06 | 9.899E-05 | 5.426   | 0.838  | 4.481   | 6.075   | 7.515   | 0.261  | 7.214   | 7.682   |
| 15121 | ENSG00000131746 | TNS4       | 2    | 0.0029837 | 0.0140216 | 0.591   | 0.124  | 0.457   | 0.701   | 0.298   | 0.077  | 0.226   | 0.379   |
| 15122 | ENSG00000168477 | TNXB       | -1.2 | 0.0100954 | 0.0367348 | 1.392   | 0.140  | 1.287   | 1.551   | 1.732   | 0.151  | 1.634   | 1.905   |
| 15123 | ENSG00000141232 | TOB1       | -1.4 | 3.407E-07 | 7.767E-06 | 22.204  | 2.738  | 20.448  | 25.359  | 32.158  | 3.381  | 29.692  | 36.012  |
| 15125 | ENSG00000229980 | TOB1-AS1   | -1.5 | 0.0025872 | 0.0125128 | 3.239   | 0.529  | 2.887   | 3.847   | 5.003   | 0.973  | 3.902   | 5.749   |
| 15126 | ENSG00000183864 | TOB2       | -1.1 | 0.0394516 | 0.1058278 | 28.483  | 1.005  | 27.508  | 29.516  | 31.437  | 1.097  | 30.179  | 32.188  |
| 15127 | ENSG00000189350 | TOGARAM2   | 1.4  | 0.0390906 | 0.1050428 | 0.289   | 0.044  | 0.239   | 0.316   | 0.207   | 0.072  | 0.133   | 0.276   |
| 15128 | ENSG00000078902 | TOLLIP     | 1.1  | 0.0813611 | 0.1837217 | 10.624  | 1.007  | 9.822   | 11.753  | 9.880   | 0.289  | 9.578   | 10.153  |
| 15129 | ENSG00000173726 | TOMM20     | -1.1 | 1.535E-05 | 0.0001898 | 269.115 | 1.435  | 267.792 | 270.641 | 312.393 | 8.917  | 303.077 | 320.849 |
| 15130 | ENSG00000230311 | TOMM20P4   | -1.3 | 3.264E-05 | 0.0003574 | 83.109  | 2.663  | 80.102  | 85.168  | 110.798 | 2.441  | 107.997 | 112.474 |
| 15131 | ENSG00000025772 | TOMM34     | 1.1  | 0.0162039 | 0.0536629 | 56.113  | 3.460  | 53.522  | 60.042  | 51.639  | 1.521  | 50.363  | 53.323  |
| 15132 | ENSG00000175768 | TOMM5      | 1.1  | 0.0177988 | 0.0575144 | 18.023  | 0.734  | 17.260  | 18.725  | 16.352  | 1.295  | 15.151  | 17.724  |
| 15133 | ENSG00000154174 | TOMM70     | -1.2 | 1.267E-05 | 0.0001635 | 62.132  | 0.918  | 61.283  | 63.105  | 73.306  | 3.409  | 71.091  | 77.232  |
| 15134 | ENSG00000160949 | TONSL      | -1.3 | 9.631E-08 | 2.644E-06 | 18.618  | 0.918  | 18.001  | 19.673  | 24.388  | 1.113  | 23.463  | 25.623  |
| 15135 | ENSG00000131747 | TOP2A      | -1.3 | 8.17E-12  | 7.158E-10 | 364.250 | 15.052 | 353.102 | 381.372 | 481.688 | 23.610 | 466.381 | 508.879 |
| 15136 | ENSG00000177302 | TOP3A      | -1.1 | 0.0092671 | 0.0342113 | 13.968  | 1.331  | 12.585  | 15.239  | 16.199  | 1.199  | 14.916  | 17.292  |
| 15138 | ENSG00000100038 | TOP3B      | -1.5 | 7.871E-10 | 3.997E-08 | 11.794  | 1.155  | 11.116  | 13.128  | 17.568  | 1.031  | 16.883  | 18.754  |
| 15139 | ENSG00000228050 | TOP3BP1    | -1.5 | 0.0041796 | 0.0183944 | 3.745   | 0.140  | 3.584   | 3.833   | 5.762   | 0.839  | 5.180   | 6.724   |
| 15140 | ENSG00000136827 | TOR1A      | 1.1  | 0.0638264 | 0.1527299 | 24.791  | 0.129  | 24.646  | 24.895  | 23.337  | 1.644  | 21.512  | 24.701  |
| 15142 | ENSG00000103460 | TOX3       | -1.7 | 3.038E-10 | 1.754E-08 | 5.645   | 0.601  | 5.136   | 6.308   | 10.083  | 0.686  | 9.291   | 10.507  |
| 15146 | ENSG00000067369 | TP53BP1    | 1.1  | 0.0157675 | 0.052491  | 19.257  | 0.206  | 19.037  | 19.447  | 18.224  | 0.881  | 17.574  | 19.226  |
| 15147 | ENSG00000175274 | TP53I11    | 1.3  | 2.784E-06 | 4.493E-05 | 28.465  | 3.044  | 25.026  | 30.815  | 22.985  | 1.332  | 21.449  | 23.808  |
| 15148 | ENSG00000164938 | TP53INP1   | -1.2 | 0.0002903 | 0.0021545 | 33.852  | 2.884  | 31.495  | 37.067  | 42.490  | 4.791  | 37.320  | 46.779  |
| 15149 | ENSG00000078804 | TP53INP2   | 1.3  | 0.0003598 | 0.0025577 | 8.035   | 0.400  | 7.578   | 8.316   | 6.362   | 0.366  | 6.000   | 6.732   |
| 15152 | ENSG00000182165 | TP53TG1    | -1.2 | 0.080297  | 0.1817381 | 23.357  | 1.785  | 22.282  | 25.418  | 27.617  | 1.687  | 26.263  | 29.506  |
| 15153 | ENSG00000078900 | TP73       | -2.1 | 1.001E-09 | 4.881E-08 | 1.481   | 0.238  | 1.212   | 1.660   | 3.202   | 0.327  | 2.824   | 3.399   |
| 15154 | ENSG00000227372 | TP73-AS1   | -1.1 | 0.0094044 | 0.0346406 | 24.474  | 0.780  | 23.819  | 25.337  | 27.548  | 1.279  | 26.136  | 28.630  |
| 15155 | ENSG00000186815 | TPCN1      | 1.2  | 0.000335  | 0.0024108 | 10.019  | 0.276  | 9.727   | 10.276  | 8.559   | 0.494  | 7.989   | 8.872   |
| 15156 | ENSG00000076554 | TPD52      | 1.1  | 0.0121644 | 0.0427638 | 18.853  | 0.375  | 18.480  | 19.231  | 17.272  | 1.529  | 15.550  | 18.472  |
| 15158 | ENSG00000141933 | TPGS1      | -1.5 | 0.0019382 | 0.0099278 | 1.558   | 0.442  | 1.105   | 1.988   | 2.455   | 0.179  | 2.319   | 2.658   |

|       | A               | B            | C    | D         | E         | F       | G      | H       | I       | J       | K      | L       | M       |
|-------|-----------------|--------------|------|-----------|-----------|---------|--------|---------|---------|---------|--------|---------|---------|
| 15159 | ENSG00000134779 | TPGS2        | 1.1  | 0.0550897 | 0.1368812 | 24.806  | 0.504  | 24.358  | 25.352  | 23.840  | 1.236  | 22.592  | 25.063  |
| 15162 | ENSG00000111669 | TPI1         | -1.1 | 0.015625  | 0.0521028 | 381.233 | 8.344  | 371.941 | 388.083 | 417.083 | 26.739 | 389.465 | 442.847 |
| 15164 | ENSG00000140416 | TPM1         | 1.1  | 0.0378202 | 0.1024592 | 113.999 | 4.809  | 108.795 | 118.280 | 110.370 | 2.264  | 107.816 | 112.129 |
| 15165 | ENSG00000143549 | TPM3         | -1   | 0.0953097 | 0.2063193 | 127.202 | 1.890  | 125.672 | 129.315 | 135.332 | 3.665  | 133.051 | 139.559 |
| 15167 | ENSG00000241015 | TPM3P9       | 1.3  | 0.008988  | 0.033395  | 5.525   | 0.542  | 4.915   | 5.954   | 4.273   | 0.780  | 3.374   | 4.778   |
| 15168 | ENSG00000167460 | TPM4         | 1.2  | 2.882E-10 | 1.669E-08 | 236.457 | 3.719  | 232.589 | 240.006 | 198.847 | 3.410  | 196.306 | 202.722 |
| 15169 | ENSG00000137364 | TPMT         | 1.1  | 0.0268249 | 0.0790951 | 37.374  | 0.794  | 36.696  | 38.247  | 35.063  | 0.472  | 34.638  | 35.570  |
| 15170 | ENSG00000166340 | TPP1         | 1.4  | 6.29E-12  | 5.626E-10 | 41.016  | 1.326  | 39.766  | 42.406  | 29.356  | 1.477  | 27.684  | 30.483  |
| 15172 | ENSG00000171368 | TPPP         | -1.3 | 0.0213524 | 0.0663483 | 0.984   | 0.085  | 0.915   | 1.079   | 1.354   | 0.076  | 1.277   | 1.428   |
| 15178 | ENSG00000163870 | TPRA1        | -1.1 | 0.055863  | 0.1382312 | 10.832  | 0.514  | 10.441  | 11.414  | 12.511  | 1.116  | 11.488  | 13.700  |
| 15180 | ENSG00000176058 | TPRN         | -1.3 | 5.169E-05 | 0.000526  | 6.288   | 0.641  | 5.666   | 6.947   | 8.600   | 0.623  | 8.191   | 9.317   |
| 15183 | ENSG00000169902 | TPST1        | -1.1 | 0.0866247 | 0.1925968 | 13.136  | 0.905  | 12.091  | 13.688  | 14.871  | 0.513  | 14.551  | 15.462  |
| 15184 | ENSG00000128294 | TPST2        | 1.1  | 0.0292857 | 0.0846835 | 22.382  | 0.922  | 21.403  | 23.232  | 21.069  | 1.097  | 19.845  | 21.964  |
| 15185 | ENSG00000133112 | TPT1         | 1.1  | 0.017743  | 0.0573782 | 530.760 | 7.859  | 525.168 | 539.746 | 514.591 | 6.196  | 508.306 | 520.695 |
| 15186 | ENSG00000170919 | TPT1-AS1     | -1.3 | 0.0006937 | 0.0043407 | 3.234   | 0.282  | 3.050   | 3.559   | 4.208   | 0.550  | 3.574   | 4.551   |
| 15188 | ENSG00000088325 | TPX2         | -1.2 | 6.92E-08  | 1.967E-06 | 201.422 | 15.179 | 189.090 | 218.375 | 254.742 | 17.051 | 241.285 | 273.917 |
| 15192 | ENSG00000164548 | TRA2A        | 1.1  | 0.0012816 | 0.0071583 | 96.262  | 4.094  | 91.569  | 99.102  | 86.758  | 3.861  | 82.870  | 90.591  |
| 15194 | ENSG00000136527 | TRA2B        | 1    | 0.0613007 | 0.1480364 | 78.344  | 2.364  | 75.664  | 80.133  | 76.452  | 0.840  | 75.668  | 77.339  |
| 15195 | ENSG00000170638 | TRABD        | -1.3 | 7.617E-07 | 1.525E-05 | 26.906  | 1.156  | 26.006  | 28.209  | 36.404  | 3.715  | 32.606  | 40.030  |
| 15196 | ENSG00000186854 | TRABD2A      | 1.2  | 0.0179863 | 0.0580648 | 3.097   | 0.400  | 2.643   | 3.397   | 2.625   | 0.370  | 2.266   | 3.006   |
| 15197 | ENSG00000131323 | TRAF3        | 1.2  | 0.0167884 | 0.0551166 | 6.239   | 0.135  | 6.115   | 6.383   | 5.490   | 0.432  | 5.170   | 5.981   |
| 15200 | ENSG00000231889 | TRAF3IP2-AS1 | -1.2 | 0.0146411 | 0.0495052 | 4.579   | 0.274  | 4.328   | 4.871   | 5.593   | 0.239  | 5.317   | 5.749   |
| 15201 | ENSG00000076604 | TRAF4        | -1.1 | 0.0006343 | 0.0040556 | 61.247  | 2.665  | 59.067  | 64.217  | 70.333  | 4.222  | 67.141  | 75.120  |
| 15202 | ENSG00000082512 | TRAF5        | 1.1  | 0.0314459 | 0.0895059 | 19.529  | 0.892  | 18.705  | 20.477  | 18.430  | 0.983  | 17.301  | 19.090  |
| 15203 | ENSG00000131653 | TRAF7        | -1.2 | 0.000144  | 0.001217  | 59.747  | 2.906  | 56.554  | 62.236  | 70.730  | 3.882  | 67.738  | 75.116  |
| 15206 | ENSG00000135148 | TRAFD1       | -1.1 | 0.00902   | 0.0334845 | 26.068  | 0.904  | 25.536  | 27.112  | 29.495  | 0.411  | 29.247  | 29.970  |
| 15207 | ENSG00000182606 | TRAK1        | 1.1  | 0.1102535 | 0.2288277 | 20.088  | 1.317  | 18.644  | 21.223  | 19.426  | 0.923  | 18.551  | 20.390  |
| 15208 | ENSG00000115993 | TRAK2        | 1.2  | 0.0014458 | 0.0078447 | 9.702   | 1.196  | 8.651   | 11.003  | 8.312   | 0.165  | 8.134   | 8.460   |
| 15210 | ENSG00000174599 | TRAM1L1      | 1.2  | 0.0488788 | 0.1249149 | 9.470   | 1.145  | 8.179   | 10.364  | 7.899   | 0.326  | 7.672   | 8.272   |
| 15211 | ENSG00000065308 | TRAM2        | 1.5  | 1.54E-11  | 1.244E-09 | 16.108  | 0.551  | 15.485  | 16.532  | 11.126  | 0.680  | 10.678  | 11.909  |
| 15212 | ENSG00000225791 | TRAM2-AS1    | 1.1  | 0.1220226 | 0.2460675 | 6.148   | 0.151  | 5.977   | 6.261   | 5.461   | 0.757  | 4.791   | 6.283   |
| 15214 | ENSG00000168016 | TRANK1       | 1.1  | 0.0011372 | 0.0065176 | 18.927  | 1.227  | 17.569  | 19.954  | 17.047  | 0.191  | 16.840  | 17.216  |
| 15215 | ENSG00000126602 | TRAP1        | -1.1 | 0.0006713 | 0.0042363 | 87.209  | 2.481  | 84.344  | 88.644  | 98.401  | 2.971  | 96.026  | 101.733 |
| 15216 | ENSG00000160218 | TRAPPC10     | -1.1 | 0.0080606 | 0.0307808 | 10.586  | 0.367  | 10.170  | 10.863  | 12.074  | 1.087  | 11.183  | 13.286  |
| 15217 | ENSG00000171853 | TRAPPC12     | 1.1  | 0.0063061 | 0.0253191 | 10.600  | 0.681  | 10.032  | 11.355  | 9.515   | 0.938  | 8.683   | 10.531  |
| 15221 | ENSG00000167515 | TRAPPC2L     | 1.2  | 0.0008759 | 0.005247  | 22.556  | 0.363  | 22.199  | 22.926  | 19.997  | 0.205  | 19.765  | 20.148  |
| 15224 | ENSG00000054116 | TRAPPC3      | 1.1  | 0.0018539 | 0.0095724 | 44.978  | 1.002  | 43.899  | 45.880  | 40.898  | 1.468  | 39.909  | 42.585  |
| 15228 | ENSG00000196655 | TRAPPC4      | -1.1 | 0.0402221 | 0.1074176 | 15.426  | 0.423  | 15.159  | 15.913  | 17.315  | 1.200  | 16.074  | 18.470  |
| 15230 | ENSG00000181029 | TRAPPC5      | -1.2 | 0.0252033 | 0.0753916 | 2.526   | 0.248  | 2.240   | 2.681   | 3.206   | 0.442  | 2.767   | 3.650   |
| 15231 | ENSG00000153339 | TRAPPC8      | -1.1 | 0.0084105 | 0.0317444 | 25.666  | 0.991  | 25.029  | 26.808  | 28.527  | 0.346  | 28.181  | 28.873  |
| 15236 | ENSG00000167632 | TRAPPC9      | 1.2  | 0.0059254 | 0.0241543 | 7.208   | 0.473  | 6.801   | 7.727   | 6.292   | 0.234  | 6.142   | 6.562   |



|       | A               | B       | C    | D         | E         | F       | G      | H       | I       | J       | K      | L       | M       |
|-------|-----------------|---------|------|-----------|-----------|---------|--------|---------|---------|---------|--------|---------|---------|
| 15240 | ENSG00000211772 | TRBC2   | 1.2  | 0.0092353 | 0.0341117 | 33.211  | 3.378  | 29.528  | 36.165  | 27.956  | 0.565  | 27.304  | 28.292  |
| 15242 | ENSG00000124496 | TRERF1  | -1.2 | 6.495E-06 | 9.23E-05  | 14.567  | 1.108  | 13.309  | 15.401  | 18.299  | 0.563  | 17.807  | 18.913  |
| 15244 | ENSG00000281103 | TRG-AS1 | 1.7  | 0.0003795 | 0.0026785 | 1.786   | 0.413  | 1.335   | 2.146   | 1.049   | 0.113  | 0.921   | 1.136   |
| 15245 | ENSG00000170855 | TRIAP1  | -1.2 | 0.0002572 | 0.0019547 | 118.791 | 8.048  | 111.997 | 127.679 | 144.833 | 6.095  | 138.283 | 150.337 |
| 15246 | ENSG00000173334 | TRIB1   | 1.2  | 1.157E-06 | 2.148E-05 | 35.713  | 2.044  | 33.539  | 37.595  | 29.502  | 0.121  | 29.367  | 29.602  |
| 15248 | ENSG00000071575 | TRIB2   | -1.2 | 1.468E-05 | 0.0001832 | 39.454  | 3.314  | 36.759  | 43.154  | 49.568  | 2.976  | 46.136  | 51.434  |
| 15251 | ENSG00000101255 | TRIB3   | 3.1  | 3.05E-18  | 1.32E-15  | 14.622  | 0.526  | 14.145  | 15.187  | 4.863   | 0.454  | 4.422   | 5.329   |
| 15253 | ENSG00000255690 | TRIL    | -1.3 | 0.0004436 | 0.0030278 | 3.803   | 0.349  | 3.470   | 4.166   | 5.249   | 0.431  | 4.752   | 5.512   |
| 15259 | ENSG00000204977 | TRIM13  | -1.1 | 0.0114145 | 0.0405065 | 12.589  | 0.338  | 12.306  | 12.962  | 14.284  | 0.620  | 13.608  | 14.827  |
| 15262 | ENSG00000109654 | TRIM2   | -1.2 | 4.485E-05 | 0.0004683 | 23.884  | 1.113  | 22.747  | 24.970  | 28.128  | 0.628  | 27.451  | 28.691  |
| 15264 | ENSG00000132109 | TRIM21  | 1.1  | 0.0685798 | 0.1612526 | 14.306  | 0.826  | 13.516  | 15.165  | 12.851  | 1.182  | 11.513  | 13.756  |
| 15269 | ENSG00000132274 | TRIM22  | 1.4  | 4.21E-11  | 3.022E-09 | 54.561  | 3.748  | 51.218  | 58.612  | 39.414  | 2.745  | 37.561  | 42.567  |
| 15271 | ENSG00000113595 | TRIM23  | -1.1 | 0.0329792 | 0.0928504 | 10.310  | 0.927  | 9.422   | 11.272  | 11.860  | 0.530  | 11.307  | 12.364  |
| 15273 | ENSG00000122779 | TRIM24  | -1.4 | 3.79E-13  | 4.45E-11  | 66.670  | 3.434  | 62.886  | 69.588  | 92.742  | 1.309  | 91.251  | 93.707  |
| 15275 | ENSG00000130726 | TRIM28  | -1.1 | 0.0012078 | 0.0068457 | 309.112 | 17.650 | 288.738 | 319.761 | 353.037 | 23.827 | 335.391 | 380.142 |
| 15277 | ENSG00000119401 | TRIM32  | -1.1 | 0.0117542 | 0.0415375 | 15.897  | 0.333  | 15.663  | 16.278  | 18.344  | 0.303  | 17.995  | 18.543  |
| 15278 | ENSG00000197323 | TRIM33  | 1.1  | 0.0934145 | 0.2033358 | 35.811  | 0.240  | 35.562  | 36.040  | 34.844  | 0.481  | 34.289  | 35.141  |
| 15279 | ENSG00000152503 | TRIM36  | 1.1  | 0.1113478 | 0.230392  | 6.333   | 0.465  | 5.797   | 6.629   | 5.854   | 0.569  | 5.322   | 6.453   |
| 15282 | ENSG00000112343 | TRIM38  | -2   | 3.146E-07 | 7.278E-06 | 0.782   | 0.095  | 0.674   | 0.855   | 1.628   | 0.223  | 1.383   | 1.819   |
| 15283 | ENSG00000204599 | TRIM39  | -1.2 | 0.003515  | 0.0159851 | 7.408   | 0.438  | 6.953   | 7.826   | 9.208   | 0.223  | 8.964   | 9.400   |
| 15284 | ENSG00000146833 | TRIM4   | -1.2 | 0.000467  | 0.0031629 | 8.790   | 0.886  | 8.072   | 9.781   | 11.113  | 0.423  | 10.782  | 11.590  |
| 15290 | ENSG00000146063 | TRIM41  | -1.1 | 0.0036207 | 0.0163824 | 7.075   | 0.308  | 6.739   | 7.343   | 8.249   | 0.629  | 7.691   | 8.930   |
| 15293 | ENSG00000166326 | TRIM44  | 1.1  | 0.0001466 | 0.0012345 | 30.296  | 1.641  | 28.531  | 31.775  | 27.320  | 0.902  | 26.300  | 28.012  |
| 15296 | ENSG00000132256 | TRIM5   | 1.2  | 3.85E-05  | 0.0004123 | 27.478  | 1.819  | 26.237  | 29.566  | 22.921  | 1.661  | 21.910  | 24.838  |
| 15297 | ENSG00000169871 | TRIM56  | 1.3  | 1.313E-08 | 4.696E-07 | 20.677  | 0.766  | 19.803  | 21.226  | 16.725  | 0.457  | 16.274  | 17.188  |
| 15299 | ENSG00000213186 | TRIM59  | -1.2 | 3.072E-05 | 0.0003405 | 17.000  | 0.615  | 16.399  | 17.627  | 20.996  | 0.707  | 20.581  | 21.813  |
| 15300 | ENSG00000121236 | TRIM6   | -1.2 | 0.0087811 | 0.0328139 | 12.483  | 1.037  | 11.678  | 13.653  | 14.710  | 0.660  | 14.027  | 15.345  |
| 15302 | ENSG00000206557 | TRIM71  | -1.1 | 0.0013435 | 0.0074161 | 300.719 | 14.850 | 283.661 | 310.764 | 335.259 | 3.588  | 332.698 | 339.360 |
| 15305 | ENSG00000177238 | TRIM72  | 1.3  | 0.0959449 | 0.2072434 | 0.633   | 0.044  | 0.591   | 0.678   | 0.501   | 0.036  | 0.460   | 0.530   |
| 15308 | ENSG00000100505 | TRIM9   | -1.2 | 0.0799676 | 0.181202  | 1.998   | 0.346  | 1.751   | 2.393   | 2.472   | 0.584  | 1.875   | 3.041   |
| 15309 | ENSG00000179046 | TRIML2  | 1.3  | 0.0349966 | 0.0969528 | 42.931  | 8.895  | 37.686  | 53.201  | 34.617  | 3.501  | 30.997  | 37.985  |
| 15310 | ENSG00000038382 | TRIO    | 1.1  | 0.0214058 | 0.0664774 | 13.630  | 0.397  | 13.237  | 14.031  | 12.943  | 0.460  | 12.451  | 13.361  |
| 15312 | ENSG00000153827 | TRIP12  | 1.1  | 0.0077487 | 0.0298869 | 44.887  | 1.847  | 43.072  | 46.765  | 42.566  | 0.531  | 42.258  | 43.179  |
| 15313 | ENSG00000205133 | TRIQK   | -1.1 | 0.0085049 | 0.032015  | 16.190  | 0.434  | 15.754  | 16.622  | 18.597  | 1.042  | 17.507  | 19.583  |
| 15315 | ENSG00000136932 | TRMO    | 1.4  | 0.0072312 | 0.028219  | 2.290   | 0.452  | 2.020   | 2.812   | 1.625   | 0.256  | 1.390   | 1.898   |
| 15317 | ENSG00000066651 | TRMT11  | 1.1  | 0.0082113 | 0.0312226 | 50.400  | 2.517  | 47.916  | 52.948  | 45.839  | 1.727  | 44.827  | 47.833  |
| 15318 | ENSG00000173113 | TRMT112 | -1.1 | 0.0913782 | 0.2005033 | 176.349 | 4.080  | 171.699 | 179.332 | 189.950 | 5.248  | 186.246 | 195.956 |
| 15319 | ENSG00000099899 | TRMT2A  | -1.1 | 0.1030459 | 0.217852  | 11.461  | 0.277  | 11.278  | 11.780  | 12.759  | 0.632  | 12.086  | 13.339  |
| 15320 | ENSG00000188917 | TRMT2B  | 1.3  | 0.0023867 | 0.0117105 | 12.009  | 1.153  | 10.887  | 13.190  | 9.782   | 1.068  | 8.972   | 10.992  |
| 15322 | ENSG00000171103 | TRMT61B | 1.1  | 0.0050968 | 0.0214595 | 35.229  | 0.407  | 34.829  | 35.641  | 31.438  | 1.370  | 30.124  | 32.858  |
| 15323 | ENSG00000100416 | TRMU    | -1.1 | 0.0123802 | 0.0432618 | 12.409  | 1.162  | 11.631  | 13.744  | 14.461  | 1.688  | 12.513  | 15.455  |

|       | A               | B          | C    | D         | E         | F      | G     | H      | I      | J      | K     | L      | M      |
|-------|-----------------|------------|------|-----------|-----------|--------|-------|--------|--------|--------|-------|--------|--------|
| 15324 | ENSG00000180098 | TRNAU1AP   | 1.2  | 0.005893  | 0.0240628 | 11.602 | 1.694 | 10.035 | 13.400 | 9.931  | 0.634 | 9.330  | 10.593 |
| 15325 | ENSG00000253368 | TRNP1      | -1.2 | 0.0017706 | 0.0092397 | 30.732 | 0.786 | 30.084 | 31.606 | 37.230 | 1.203 | 35.894 | 38.229 |
| 15327 | ENSG00000072756 | TRNT1      | 1.1  | 0.0118061 | 0.0416697 | 24.718 | 0.988 | 23.646 | 25.593 | 22.748 | 1.459 | 21.902 | 24.432 |
| 15328 | ENSG00000067445 | TRO        | -1.2 | 2.496E-05 | 0.0002871 | 25.061 | 0.890 | 24.374 | 26.066 | 30.145 | 1.142 | 29.421 | 31.461 |
| 15330 | ENSG00000135451 | TROAP      | -1.1 | 0.0281463 | 0.0822174 | 25.184 | 0.992 | 24.529 | 26.325 | 28.229 | 1.342 | 26.904 | 29.587 |
| 15334 | ENSG00000116747 | TROVE2     | -1.1 | 0.0374388 | 0.1016802 | 15.529 | 0.289 | 15.255 | 15.832 | 17.298 | 1.650 | 15.407 | 18.445 |
| 15335 | ENSG00000144935 | TRPC1      | 1.1  | 0.084984  | 0.1898678 | 14.775 | 0.509 | 14.217 | 15.214 | 13.833 | 1.288 | 12.629 | 15.191 |
| 15336 | ENSG00000072315 | TRPC5      | -1.5 | 0.0396566 | 0.1062261 | 0.617  | 0.171 | 0.485  | 0.810  | 0.928  | 0.361 | 0.514  | 1.179  |
| 15340 | ENSG00000083067 | TRPM3      | 1.3  | 0.0015128 | 0.0081459 | 1.523  | 0.115 | 1.394  | 1.617  | 1.218  | 0.014 | 1.202  | 1.228  |
| 15341 | ENSG00000130529 | TRPM4      | -1.2 | 0.0053935 | 0.0223884 | 3.965  | 0.151 | 3.799  | 4.094  | 4.919  | 0.159 | 4.751  | 5.068  |
| 15345 | ENSG00000119121 | TRPM6      | 1.2  | 0.1109898 | 0.2299354 | 0.902  | 0.062 | 0.835  | 0.956  | 0.754  | 0.103 | 0.635  | 0.817  |
| 15347 | ENSG00000092439 | TRPM7      | 1.2  | 1.164E-06 | 2.154E-05 | 23.138 | 1.616 | 21.273 | 24.135 | 19.273 | 0.603 | 18.586 | 19.716 |
| 15348 | ENSG00000104447 | TRPS1      | -1.1 | 0.0843799 | 0.1889471 | 2.449  | 0.276 | 2.148  | 2.691  | 2.819  | 0.117 | 2.740  | 2.954  |
| 15350 | ENSG00000149743 | TRPT1      | -1.1 | 0.0523922 | 0.1317438 | 14.632 | 0.555 | 14.157 | 15.242 | 16.828 | 0.870 | 15.952 | 17.692 |
| 15352 | ENSG00000187688 | TRPV2      | -1.5 | 0.0401656 | 0.1073129 | 0.796  | 0.052 | 0.736  | 0.830  | 1.183  | 0.179 | 1.009  | 1.366  |
| 15353 | ENSG00000165125 | TRPV6      | 1.3  | 0.0995712 | 0.2125837 | 0.526  | 0.049 | 0.496  | 0.582  | 0.418  | 0.047 | 0.391  | 0.472  |
| 15355 | ENSG00000196367 | TRRAP      | -1.1 | 0.0002266 | 0.001764  | 34.519 | 1.111 | 33.532 | 35.722 | 39.572 | 2.294 | 37.938 | 42.194 |
| 15356 | ENSG00000165832 | TRUB1      | 1.1  | 0.0077094 | 0.0297557 | 38.129 | 1.120 | 37.171 | 39.361 | 34.724 | 2.023 | 32.704 | 36.751 |
| 15357 | ENSG00000102804 | TSC22D1    | -1.1 | 0.002133  | 0.0106604 | 36.507 | 2.177 | 34.014 | 38.028 | 41.367 | 1.823 | 39.263 | 42.470 |
| 15359 | ENSG00000196428 | TSC22D2    | -1.1 | 0.0262703 | 0.0778438 | 5.954  | 0.455 | 5.539  | 6.441  | 6.830  | 0.405 | 6.424  | 7.233  |
| 15360 | ENSG00000157514 | TSC22D3    | 1.5  | 1.372E-08 | 4.895E-07 | 12.891 | 0.973 | 12.206 | 14.004 | 8.903  | 0.750 | 8.048  | 9.451  |
| 15361 | ENSG00000198860 | TSEN15     | 1.4  | 3.261E-10 | 1.851E-08 | 64.606 | 3.635 | 62.108 | 68.776 | 47.025 | 3.352 | 44.109 | 50.688 |
| 15365 | ENSG00000182173 | TSEN54     | -1.2 | 0.0011262 | 0.0064679 | 16.000 | 1.034 | 14.812 | 16.696 | 19.716 | 1.707 | 18.726 | 21.687 |
| 15368 | ENSG00000175513 | TSGA10IP   | -1.6 | 0.0170264 | 0.0556567 | 1.196  | 0.294 | 0.867  | 1.432  | 1.946  | 0.672 | 1.457  | 2.711  |
| 15369 | ENSG00000121297 | TSHZ3      | 1.2  | 0.0040627 | 0.0179755 | 6.212  | 0.622 | 5.816  | 6.929  | 5.265  | 0.177 | 5.078  | 5.431  |
| 15370 | ENSG00000145777 | TSLP       | 2.3  | 4.106E-06 | 6.263E-05 | 1.775  | 0.105 | 1.705  | 1.896  | 0.791  | 0.363 | 0.544  | 1.208  |
| 15372 | ENSG00000211460 | TSN        | 1.1  | 9.994E-06 | 0.0001335 | 80.966 | 1.347 | 79.753 | 82.416 | 71.984 | 1.375 | 70.408 | 72.935 |
| 15376 | ENSG00000110900 | TSPAN11    | 1.5  | 1.89E-06  | 3.238E-05 | 5.444  | 0.481 | 5.085  | 5.990  | 3.738  | 0.141 | 3.590  | 3.870  |
| 15379 | ENSG00000106025 | TSPAN12    | 1.1  | 0.0471966 | 0.1215763 | 14.928 | 1.413 | 13.598 | 16.411 | 13.668 | 0.328 | 13.379 | 14.024 |
| 15382 | ENSG00000106537 | TSPAN13    | 1.1  | 0.1153941 | 0.2359929 | 49.137 | 2.557 | 46.537 | 51.649 | 46.843 | 1.480 | 45.218 | 48.112 |
| 15383 | ENSG00000108219 | TSPAN14    | -1.2 | 1.738E-05 | 0.0002108 | 6.718  | 0.538 | 6.215  | 7.285  | 8.376  | 0.442 | 7.958  | 8.838  |
| 15386 | ENSG00000157570 | TSPAN18    | -1.2 | 0.0004405 | 0.0030129 | 7.706  | 0.839 | 6.941  | 8.603  | 9.783  | 0.602 | 9.099  | 10.233 |
| 15387 | ENSG00000134198 | TSPAN2     | 1.2  | 2.938E-05 | 0.0003276 | 22.604 | 0.554 | 22.269 | 23.243 | 18.718 | 0.474 | 18.402 | 19.263 |
| 15388 | ENSG00000140391 | TSPAN3     | 1.1  | 0.0281033 | 0.08212   | 36.082 | 1.211 | 34.768 | 37.152 | 34.366 | 1.694 | 32.432 | 35.584 |
| 15389 | ENSG00000135452 | TSPAN31    | 1.1  | 0.0193523 | 0.0613852 | 11.634 | 0.521 | 11.324 | 12.236 | 10.570 | 0.175 | 10.382 | 10.728 |
| 15390 | ENSG00000214063 | TSPAN4     | 1.1  | 0.0561359 | 0.1386479 | 19.482 | 0.662 | 18.773 | 20.083 | 18.350 | 0.644 | 17.814 | 19.065 |
| 15391 | ENSG00000000003 | TSPAN6     | 1.1  | 0.0568891 | 0.1399311 | 49.739 | 2.315 | 47.175 | 51.677 | 47.639 | 0.945 | 46.778 | 48.649 |
| 15392 | ENSG00000156298 | TSPAN7     | 1.1  | 0.1068965 | 0.2237827 | 7.667  | 0.406 | 7.329  | 8.118  | 6.948  | 0.441 | 6.588  | 7.440  |
| 15394 | ENSG00000175894 | TSPEAR     | 1.4  | 0.0190295 | 0.0606227 | 2.064  | 0.283 | 1.833  | 2.379  | 1.533  | 0.087 | 1.434  | 1.598  |
| 15399 | ENSG00000182912 | TSPEAR-AS2 | 1.2  | 0.1105621 | 0.2292713 | 4.472  | 0.306 | 4.294  | 4.825  | 3.913  | 0.287 | 3.695  | 4.238  |

|       | A               | B         | C    | D         | E         | F       | G      | H       | I       | J       | K      | L       | M       |
|-------|-----------------|-----------|------|-----------|-----------|---------|--------|---------|---------|---------|--------|---------|---------|
| 15400 | ENSG00000189241 | TSPYL1    | 1.1  | 0.0174875 | 0.0567361 | 61.905  | 1.334  | 60.372  | 62.801  | 58.571  | 0.714  | 58.104  | 59.393  |
| 15402 | ENSG00000184205 | TSPYL2    | -1.1 | 0.0849066 | 0.1897246 | 10.221  | 1.281  | 8.743   | 11.020  | 11.589  | 0.491  | 11.221  | 12.147  |
| 15404 | ENSG00000187189 | TSPYL4    | 1.2  | 2.8E-05   | 0.0003155 | 27.393  | 0.448  | 26.986  | 27.872  | 22.912  | 1.119  | 21.799  | 24.038  |
| 15405 | ENSG00000032389 | TSSC1     | -1.1 | 0.0371317 | 0.1010643 | 7.840   | 0.192  | 7.619   | 7.956   | 8.965   | 0.267  | 8.686   | 9.219   |
| 15408 | ENSG00000223756 | TSSC2     | -1.1 | 0.0002127 | 0.0016724 | 88.627  | 2.833  | 85.400  | 90.706  | 103.617 | 7.183  | 95.323  | 107.826 |
| 15409 | ENSG00000136925 | TSTD2     | 1.1  | 0.1052572 | 0.2211524 | 19.675  | 0.500  | 19.100  | 20.008  | 18.846  | 0.484  | 18.528  | 19.403  |
| 15410 | ENSG00000149292 | TTC12     | 1.2  | 0.0080691 | 0.0308065 | 5.158   | 0.314  | 4.917   | 5.514   | 4.291   | 0.294  | 3.966   | 4.540   |
| 15411 | ENSG00000052841 | TTC17     | -1.1 | 3.183E-05 | 0.0003507 | 24.910  | 0.429  | 24.507  | 25.361  | 29.250  | 0.690  | 28.608  | 29.979  |
| 15412 | ENSG00000011295 | TTC19     | 1.1  | 0.0070801 | 0.0277575 | 39.253  | 0.352  | 39.002  | 39.656  | 36.843  | 0.246  | 36.651  | 37.121  |
| 15413 | ENSG00000103852 | TTC23     | -1.1 | 0.0280832 | 0.0820898 | 11.050  | 0.268  | 10.783  | 11.318  | 12.522  | 0.556  | 11.905  | 12.984  |
| 15414 | ENSG00000205838 | TTC23L    | -1.4 | 0.0292534 | 0.0846328 | 1.370   | 0.104  | 1.251   | 1.446   | 1.897   | 0.203  | 1.666   | 2.042   |
| 15417 | ENSG00000235954 | TTC28-AS1 | -1.1 | 0.0282175 | 0.0823685 | 3.427   | 0.143  | 3.330   | 3.592   | 4.003   | 0.202  | 3.773   | 4.149   |
| 15418 | ENSG00000182670 | TTC3      | 1.2  | 8.564E-06 | 0.0001167 | 15.539  | 0.198  | 15.357  | 15.751  | 13.389  | 0.182  | 13.220  | 13.581  |
| 15422 | ENSG00000197557 | TTC30A    | 1.3  | 0.0022512 | 0.0111364 | 3.153   | 0.147  | 3.032   | 3.316   | 2.454   | 0.220  | 2.225   | 2.664   |
| 15424 | ENSG00000196659 | TTC30B    | 1.3  | 0.0194488 | 0.0616105 | 3.609   | 0.437  | 3.169   | 4.043   | 2.924   | 0.380  | 2.513   | 3.261   |
| 15425 | ENSG00000198677 | TTC37     | -1.1 | 0.0320753 | 0.0909726 | 45.209  | 1.705  | 44.040  | 47.165  | 49.277  | 0.859  | 48.301  | 49.918  |
| 15427 | ENSG00000085831 | TTC39A    | 1.3  | 0.0003422 | 0.002458  | 3.285   | 0.295  | 2.992   | 3.582   | 2.579   | 0.110  | 2.472   | 2.692   |
| 15433 | ENSG00000155158 | TTC39B    | 1.1  | 0.1246418 | 0.249919  | 5.959   | 0.535  | 5.555   | 6.566   | 5.620   | 0.086  | 5.547   | 5.714   |
| 15434 | ENSG00000215105 | TTC3P1    | 1.2  | 0.0241788 | 0.0730764 | 5.029   | 0.314  | 4.738   | 5.361   | 4.343   | 0.338  | 3.974   | 4.638   |
| 15436 | ENSG00000243725 | TTC4      | 1.2  | 0.1201037 | 0.2430383 | 3.261   | 0.201  | 3.041   | 3.435   | 2.842   | 0.441  | 2.439   | 3.312   |
| 15437 | ENSG00000136319 | TTC5      | 1.1  | 0.0776659 | 0.1773047 | 5.351   | 0.178  | 5.158   | 5.507   | 4.992   | 0.194  | 4.801   | 5.189   |
| 15439 | ENSG00000133985 | TTC9      | 1.3  | 4.102E-10 | 2.217E-08 | 33.116  | 1.142  | 31.838  | 34.039  | 25.228  | 0.854  | 24.291  | 25.962  |
| 15440 | ENSG00000125482 | TTF1      | -1.1 | 0.0095255 | 0.0350229 | 17.803  | 1.344  | 16.773  | 19.324  | 20.779  | 0.409  | 20.433  | 21.231  |
| 15443 | ENSG00000116830 | TTF2      | 1.1  | 0.0341038 | 0.0952126 | 26.794  | 0.785  | 26.002  | 27.572  | 25.650  | 0.518  | 25.062  | 26.038  |
| 15444 | ENSG00000101407 | TTI1      | -1.1 | 0.0877716 | 0.1943801 | 42.343  | 2.454  | 39.589  | 44.299  | 45.914  | 0.864  | 44.936  | 46.575  |
| 15447 | ENSG00000112742 | TTK       | -1.2 | 2.742E-05 | 0.0003094 | 63.089  | 3.707  | 59.542  | 66.938  | 79.459  | 4.617  | 76.174  | 84.737  |
| 15450 | ENSG00000114999 | TTL       | 1.1  | 0.0059458 | 0.0242201 | 12.083  | 0.624  | 11.478  | 12.725  | 11.128  | 0.662  | 10.484  | 11.807  |
| 15451 | ENSG00000100271 | TTL1      | 1.4  | 2.848E-05 | 0.0003199 | 15.899  | 1.651  | 14.867  | 17.803  | 11.296  | 1.435  | 9.924   | 12.786  |
| 15453 | ENSG00000162571 | TTL10     | -1.5 | 0.0697436 | 0.1634121 | 0.514   | 0.209  | 0.300   | 0.718   | 0.782   | 0.142  | 0.630   | 0.912   |
| 15454 | ENSG00000100304 | TTL12     | -1.2 | 5.329E-06 | 7.844E-05 | 54.636  | 1.313  | 53.218  | 55.810  | 66.064  | 3.589  | 63.269  | 70.112  |
| 15456 | ENSG00000135912 | TTL4      | -1.1 | 0.0776146 | 0.1772476 | 22.337  | 0.591  | 21.655  | 22.704  | 24.461  | 1.770  | 22.532  | 26.009  |
| 15457 | ENSG00000170703 | TTL6      | -1.3 | 0.0161462 | 0.0535346 | 2.818   | 0.206  | 2.601   | 3.013   | 3.647   | 0.694  | 3.241   | 4.448   |
| 15463 | ENSG00000137941 | TTL7      | -1.1 | 0.1186282 | 0.2408016 | 1.906   | 0.083  | 1.822   | 1.989   | 2.184   | 0.153  | 2.074   | 2.359   |
| 15464 | ENSG00000124120 | TTPAL     | 1.1  | 0.0429679 | 0.112927  | 8.844   | 0.625  | 8.122   | 9.208   | 8.117   | 0.694  | 7.605   | 8.907   |
| 15466 | ENSG00000141540 | TTYH2     | -1.5 | 0.0013123 | 0.007282  | 1.341   | 0.304  | 1.017   | 1.621   | 2.067   | 0.256  | 1.775   | 2.254   |
| 15468 | ENSG00000167552 | TUBA1A    | 1.2  | 3.099E-08 | 9.819E-07 | 228.648 | 5.884  | 222.124 | 233.552 | 195.376 | 5.889  | 188.617 | 199.404 |
| 15469 | ENSG00000167553 | TUBA1C    | 1.1  | 0.005154  | 0.0216247 | 323.529 | 6.025  | 316.951 | 328.778 | 308.784 | 6.131  | 301.728 | 312.812 |
| 15470 | ENSG00000127824 | TUBA4A    | 1.2  | 0.000185  | 0.0015006 | 21.746  | 0.221  | 21.501  | 21.931  | 18.742  | 0.631  | 18.021  | 19.189  |
| 15471 | ENSG00000137267 | TUBB2A    | 1.3  | 3.96E-10  | 2.16E-08  | 463.849 | 32.854 | 438.717 | 501.025 | 352.612 | 19.370 | 333.894 | 372.574 |
| 15475 | ENSG00000137285 | TUBB2B    | 1.1  | 7.893E-06 | 0.000109  | 610.633 | 19.530 | 598.596 | 633.167 | 549.719 | 17.326 | 535.292 | 568.936 |
| 15480 | ENSG00000216819 | TUBB2BP1  | 1.2  | 0.0072639 | 0.0283205 | 58.626  | 2.820  | 56.577  | 61.843  | 51.633  | 3.287  | 47.932  | 54.214  |

|       | A               | B       | C    | D         | E         | F       | G     | H       | I       | J       | K     | L       | M       |
|-------|-----------------|---------|------|-----------|-----------|---------|-------|---------|---------|---------|-------|---------|---------|
| 15481 | ENSG00000104833 | TUBB4A  | -1.2 | 0.0138475 | 0.0473607 | 12.457  | 1.565 | 10.749  | 13.823  | 14.934  | 1.522 | 14.003  | 16.690  |
| 15485 | ENSG00000188229 | TUBB4B  | -1.1 | 0.0012623 | 0.0070832 | 361.864 | 4.558 | 356.940 | 365.938 | 403.001 | 5.465 | 396.729 | 406.742 |
| 15488 | ENSG00000176014 | TUBB6   | 1.3  | 6.689E-08 | 1.908E-06 | 41.847  | 2.194 | 39.445  | 43.744  | 32.895  | 1.061 | 32.105  | 34.100  |
| 15489 | ENSG00000127589 | TUBBP1  | -1.1 | 0.0302852 | 0.0869189 | 187.073 | 2.478 | 185.453 | 189.925 | 205.676 | 9.162 | 199.585 | 216.213 |
| 15492 | ENSG00000159247 | TUBBP5  | 1.2  | 0.1002846 | 0.2136431 | 5.894   | 0.666 | 5.149   | 6.431   | 5.144   | 0.356 | 4.734   | 5.371   |
| 15501 | ENSG00000108423 | TUBD1   | -1.1 | 0.0785948 | 0.1790268 | 9.354   | 0.608 | 8.769   | 9.982   | 10.692  | 0.843 | 9.840   | 11.527  |
| 15502 | ENSG00000074935 | TUBE1   | 1.4  | 5.61E-08  | 1.652E-06 | 10.814  | 0.551 | 10.206  | 11.281  | 7.721   | 0.867 | 6.886   | 8.616   |
| 15503 | ENSG00000131462 | TUBG1   | -1.1 | 0.0300801 | 0.0864331 | 79.225  | 2.425 | 76.959  | 81.783  | 87.570  | 1.954 | 85.336  | 88.958  |
| 15507 | ENSG00000037042 | TUBG2   | -1.2 | 0.0010268 | 0.0060026 | 17.738  | 1.338 | 16.511  | 19.165  | 21.779  | 0.234 | 21.607  | 22.045  |
| 15510 | ENSG00000126216 | TUBGCP3 | -1.1 | 0.024448  | 0.0736663 | 16.910  | 0.407 | 16.619  | 17.375  | 18.855  | 0.735 | 18.006  | 19.285  |
| 15511 | ENSG00000128159 | TUBGCP6 | -1.2 | 0.0012474 | 0.0070138 | 12.958  | 0.014 | 12.942  | 12.970  | 15.473  | 1.343 | 14.502  | 17.005  |
| 15512 | ENSG00000143367 | TUFT1   | 1.1  | 0.0211406 | 0.06592   | 14.541  | 0.655 | 13.820  | 15.098  | 12.947  | 0.959 | 11.897  | 13.776  |
| 15513 | ENSG00000112041 | TULP1   | -1.3 | 0.0547978 | 0.1363135 | 2.654   | 0.129 | 2.546   | 2.797   | 3.438   | 0.642 | 2.697   | 3.836   |
| 15514 | ENSG00000130338 | TULP4   | 1.1  | 0.0295622 | 0.0852926 | 6.246   | 0.111 | 6.117   | 6.314   | 5.692   | 0.090 | 5.587   | 5.746   |
| 15515 | ENSG00000250366 | TUNAR   | 1.1  | 0.1112264 | 0.2302254 | 68.915  | 3.221 | 66.996  | 72.634  | 66.761  | 2.618 | 63.942  | 69.116  |
| 15516 | ENSG00000198680 | TUSC1   | -1.2 | 0.1156431 | 0.2364734 | 5.511   | 0.782 | 4.608   | 5.972   | 6.628   | 0.594 | 6.055   | 7.241   |
| 15517 | ENSG00000104723 | TUSC3   | 1.1  | 0.0657036 | 0.1560737 | 38.025  | 0.263 | 37.722  | 38.202  | 36.567  | 1.970 | 34.651  | 38.587  |
| 15518 | ENSG00000166676 | TVP23A  | 1.3  | 0.0244063 | 0.0736036 | 2.543   | 0.109 | 2.434   | 2.652   | 2.053   | 0.329 | 1.675   | 2.264   |
| 15519 | ENSG00000171928 | TVP23B  | -1.2 | 0.006123  | 0.0247511 | 9.774   | 1.021 | 8.802   | 10.839  | 11.701  | 0.796 | 11.016  | 12.574  |
| 15520 | ENSG00000122691 | TWIST1  | 2.9  | 0.0006548 | 0.0041617 | 0.972   | 0.086 | 0.872   | 1.026   | 0.341   | 0.097 | 0.231   | 0.410   |
| 15521 | ENSG00000105849 | TWISTNB | 1.1  | 0.0675045 | 0.1593891 | 28.544  | 0.911 | 27.546  | 29.329  | 26.974  | 1.038 | 25.982  | 28.053  |
| 15522 | ENSG00000107815 | TWNK    | -1.2 | 1.588E-05 | 0.0001951 | 23.636  | 1.533 | 22.601  | 25.397  | 29.981  | 1.609 | 28.510  | 31.699  |
| 15523 | ENSG00000128791 | TWSG1   | 1.1  | 0.0247198 | 0.0743132 | 32.844  | 0.793 | 32.013  | 33.593  | 30.520  | 0.534 | 29.940  | 30.990  |
| 15524 | ENSG00000086712 | TXLNG   | 1.1  | 0.0260458 | 0.0773371 | 89.122  | 3.227 | 85.566  | 91.864  | 85.193  | 0.849 | 84.492  | 86.138  |
| 15525 | ENSG00000117862 | TXNDC12 | 1.1  | 0.0124112 | 0.0433342 | 86.681  | 0.598 | 86.067  | 87.260  | 82.100  | 1.322 | 81.329  | 83.627  |
| 15526 | ENSG00000113621 | TXNDC15 | 1.1  | 0.0036882 | 0.016621  | 15.604  | 0.096 | 15.535  | 15.714  | 13.972  | 0.437 | 13.471  | 14.276  |
| 15527 | ENSG00000087301 | TXNDC16 | 1.2  | 5.899E-06 | 8.541E-05 | 22.164  | 1.121 | 21.417  | 23.453  | 18.215  | 0.470 | 17.762  | 18.700  |
| 15528 | ENSG00000129235 | TXNDC17 | -1.1 | 0.0792249 | 0.1801225 | 40.727  | 1.822 | 38.692  | 42.207  | 44.250  | 1.017 | 43.618  | 45.423  |
| 15530 | ENSG00000265972 | TXNIP   | -1.5 | 0.0001113 | 0.000984  | 18.572  | 2.250 | 17.147  | 21.166  | 28.499  | 5.720 | 22.835  | 34.273  |
| 15531 | ENSG00000198431 | TXNRD1  | 1.4  | 1.65E-14  | 2.85E-12  | 102.092 | 2.023 | 99.772  | 103.493 | 76.700  | 0.871 | 75.705  | 77.323  |
| 15532 | ENSG00000184470 | TXNRD2  | 1.3  | 5.535E-06 | 8.105E-05 | 7.258   | 0.334 | 6.957   | 7.618   | 5.627   | 0.499 | 5.302   | 6.201   |
| 15533 | ENSG00000197763 | TXNRD3  | 1.4  | 4.236E-06 | 6.437E-05 | 14.871  | 0.906 | 13.879  | 15.654  | 10.941  | 1.165 | 9.614   | 11.794  |
| 15534 | ENSG00000176912 | TYMSOS  | -1.2 | 0.0052497 | 0.0219071 | 39.351  | 3.926 | 36.784  | 43.870  | 49.700  | 9.164 | 39.302  | 56.598  |
| 15535 | ENSG00000092445 | TYRO3   | 1.1  | 0.0016343 | 0.0086865 | 25.660  | 2.068 | 23.452  | 27.550  | 23.061  | 1.794 | 21.248  | 24.835  |
| 15536 | ENSG00000198874 | TYW1    | -1.1 | 0.0563011 | 0.1389833 | 14.517  | 0.288 | 14.204  | 17.771  | 16.240  | 0.217 | 16.088  | 16.488  |
| 15537 | ENSG00000160201 | U2AF1   | -1.1 | 0.0017805 | 0.0092769 | 24.803  | 0.517 | 24.266  | 25.297  | 27.936  | 0.675 | 27.157  | 28.355  |
| 15538 | ENSG00000275895 | U2AF1L5 | -1.1 | 0.0027841 | 0.0132875 | 23.413  | 0.298 | 23.224  | 23.757  | 26.279  | 0.719 | 25.460  | 26.806  |
| 15539 | ENSG00000137831 | UACA    | 1.1  | 0.0757556 | 0.1738002 | 21.188  | 0.231 | 20.921  | 21.322  | 20.377  | 0.661 | 19.920  | 21.135  |
| 15540 | ENSG00000117143 | UAP1    | 1.1  | 0.0408168 | 0.1086215 | 32.180  | 1.585 | 30.408  | 33.464  | 30.279  | 1.611 | 28.805  | 31.998  |
| 15541 | ENSG00000197355 | UAP1L1  | 1.3  | 0.0006341 | 0.0040556 | 7.524   | 0.356 | 7.131   | 7.825   | 5.797   | 0.755 | 4.968   | 6.444   |
| 15542 | ENSG00000130985 | UBA1    | -1.1 | 0.0012409 | 0.0069866 | 187.670 | 8.688 | 178.472 | 195.738 | 209.827 | 8.331 | 200.850 | 217.311 |
| 15543 | ENSG00000126261 | UBA2    | -1.1 | 0.0047695 | 0.0204065 | 159.956 | 5.569 | 156.162 | 166.349 | 176.203 | 3.143 | 172.575 | 178.099 |
| 15544 | ENSG00000221983 | UBA52   | -1   | 0.0614549 | 0.1482432 | 171.608 | 1.269 | 170.556 | 173.018 | 183.950 | 4.929 | 180.834 | 189.633 |

|       | A               | B         | C    | D         | E         | F       | G      | H       | I       | J       | K      | L       | M       |
|-------|-----------------|-----------|------|-----------|-----------|---------|--------|---------|---------|---------|--------|---------|---------|
| 15545 | ENSG00000248049 | UBA6-AS1  | 1.1  | 0.1065102 | 0.2231673 | 5.581   | 0.360  | 5.244   | 5.959   | 5.147   | 0.085  | 5.050   | 5.209   |
| 15546 | ENSG00000228889 | UBAC2-AS1 | -1.6 | 0.0039295 | 0.0175367 | 2.314   | 0.090  | 2.252   | 2.418   | 3.762   | 0.693  | 3.015   | 4.385   |
| 15547 | ENSG00000185262 | UBALD2    | 1.1  | 0.0724349 | 0.168209  | 21.071  | 0.925  | 20.312  | 22.102  | 19.244  | 2.308  | 16.593  | 20.801  |
| 15548 | ENSG00000165006 | UBAP1     | -1.1 | 0.0166524 | 0.0547603 | 38.224  | 0.278  | 38.001  | 38.536  | 43.036  | 1.930  | 41.010  | 44.852  |
| 15549 | ENSG00000143569 | UBAP2L    | 1.1  | 0.0799796 | 0.181205  | 74.807  | 2.417  | 72.120  | 76.806  | 72.590  | 2.858  | 69.575  | 75.259  |
| 15550 | ENSG00000077721 | UBE2A     | 1.1  | 0.0647053 | 0.1542488 | 32.073  | 0.962  | 31.146  | 33.067  | 30.612  | 2.026  | 29.228  | 32.938  |
| 15551 | ENSG00000175063 | UBE2C     | -1.3 | 8.45E-10  | 4.216E-08 | 270.935 | 15.555 | 256.611 | 287.482 | 353.099 | 15.292 | 337.650 | 368.228 |
| 15552 | ENSG00000072401 | UBE2D1    | 1.1  | 0.0043763 | 0.0190717 | 52.266  | 2.029  | 49.925  | 53.508  | 47.251  | 0.508  | 46.866  | 47.826  |
| 15553 | ENSG00000109332 | UBE2D3    | 1.1  | 0.0186489 | 0.0596365 | 109.203 | 1.308  | 107.709 | 110.141 | 105.311 | 2.041  | 103.300 | 107.381 |
| 15554 | ENSG00000078967 | UBE2D4    | 1.2  | 0.0796269 | 0.1805993 | 3.112   | 0.171  | 2.915   | 3.224   | 2.699   | 0.356  | 2.290   | 2.939   |
| 15555 | ENSG00000182247 | UBE2E2    | -1.1 | 0.0150734 | 0.0506363 | 27.128  | 0.521  | 26.530  | 27.481  | 30.864  | 1.383  | 29.267  | 31.672  |
| 15556 | ENSG00000170035 | UBE2E3    | -1.1 | 0.009772  | 0.0357737 | 49.743  | 1.501  | 48.233  | 51.234  | 55.706  | 1.000  | 54.553  | 56.320  |
| 15557 | ENSG00000184182 | UBE2F     | 1.1  | 0.0400451 | 0.1070801 | 7.426   | 0.189  | 7.234   | 7.611   | 6.626   | 0.326  | 6.321   | 6.970   |
| 15558 | ENSG00000132388 | UBE2G1    | -1.1 | 0.0074748 | 0.0289958 | 90.533  | 1.543  | 88.836  | 91.854  | 100.849 | 2.962  | 99.063  | 104.269 |
| 15559 | ENSG00000184787 | UBE2G2    | -1.1 | 0.0961846 | 0.207602  | 50.239  | 1.880  | 48.539  | 52.258  | 54.164  | 2.028  | 51.900  | 55.813  |
| 15560 | ENSG00000186591 | UBE2H     | 1.1  | 0.0189986 | 0.0605356 | 79.498  | 3.697  | 75.254  | 82.021  | 75.817  | 1.532  | 74.775  | 77.576  |
| 15561 | ENSG00000198833 | UBE2J1    | 1.2  | 4.486E-06 | 6.75E-05  | 28.344  | 1.416  | 27.447  | 29.976  | 23.357  | 1.028  | 22.299  | 24.353  |
| 15562 | ENSG00000160087 | UBE2J2    | -1.1 | 0.0452121 | 0.1176286 | 15.337  | 0.854  | 14.418  | 16.106  | 17.284  | 1.472  | 15.589  | 18.240  |
| 15563 | ENSG00000078140 | UBE2K     | 1.2  | 9.074E-06 | 0.0001226 | 153.393 | 1.843  | 151.840 | 155.430 | 136.152 | 2.397  | 133.937 | 138.696 |
| 15564 | ENSG00000156587 | UBE2L6    | 1.1  | 0.0073738 | 0.0286303 | 53.467  | 0.932  | 52.754  | 54.522  | 48.728  | 2.503  | 45.957  | 50.824  |
| 15565 | ENSG00000175931 | UBE2O     | -1.2 | 0.000221  | 0.0017311 | 21.987  | 0.648  | 21.262  | 22.508  | 27.302  | 3.746  | 24.140  | 31.439  |
| 15566 | ENSG00000160714 | UBE2Q1    | 1.1  | 0.0512607 | 0.1294031 | 38.394  | 1.267  | 37.094  | 39.624  | 36.721  | 0.456  | 36.203  | 37.061  |
| 15567 | ENSG00000140367 | UBE2Q2    | 1.1  | 0.040312  | 0.1076068 | 37.294  | 2.220  | 35.570  | 39.799  | 35.200  | 0.937  | 34.309  | 36.176  |
| 15569 | ENSG00000259429 | UBE2Q2P2  | -1.2 | 0.0240689 | 0.0727963 | 11.139  | 0.979  | 10.080  | 12.011  | 13.572  | 0.956  | 12.930  | 14.671  |
| 15570 | ENSG00000108106 | UBE2S     | -1.3 | 0.0052556 | 0.0219207 | 97.502  | 4.682  | 92.134  | 100.742 | 126.124 | 16.970 | 109.414 | 143.343 |
| 15571 | ENSG00000233966 | UBE2SP1   | -1.2 | 0.0002057 | 0.0016275 | 217.509 | 8.526  | 208.432 | 225.348 | 260.485 | 9.619  | 254.430 | 271.577 |
| 15572 | ENSG00000077152 | UBE2T     | 1.1  | 0.0078144 | 0.0300691 | 117.359 | 7.887  | 108.976 | 124.632 | 107.196 | 6.334  | 101.346 | 113.922 |
| 15573 | ENSG00000244687 | UBE2V1    | -1.1 | 0.0622034 | 0.1497147 | 5.037   | 0.426  | 4.643   | 5.489   | 5.897   | 0.071  | 5.854   | 5.979   |
| 15574 | ENSG00000159202 | UBE2Z     | -1.1 | 0.0004207 | 0.0029092 | 36.634  | 1.584  | 35.031  | 38.198  | 42.204  | 1.333  | 41.192  | 43.715  |
| 15575 | ENSG00000151148 | UBE3B     | 1.1  | 0.0104889 | 0.0378975 | 8.831   | 0.437  | 8.376   | 9.248   | 7.982   | 0.408  | 7.625   | 8.427   |
| 15576 | ENSG00000009335 | UBE3C     | -1.1 | 0.0534042 | 0.1335568 | 27.366  | 1.004  | 26.210  | 28.008  | 29.664  | 0.625  | 29.072  | 30.318  |
| 15577 | ENSG00000118420 | UBE3D     | -1.2 | 0.0015902 | 0.0084898 | 4.363   | 0.230  | 4.136   | 4.595   | 5.573   | 0.295  | 5.283   | 5.873   |
| 15578 | ENSG00000120942 | UBIAD1    | -1.1 | 0.0588662 | 0.1435209 | 9.691   | 0.295  | 9.384   | 9.971   | 10.923  | 0.263  | 10.705  | 11.215  |
| 15580 | ENSG00000198258 | UBL5      | -1.1 | 0.0014217 | 0.0077492 | 101.452 | 2.680  | 98.519  | 103.773 | 116.994 | 4.624  | 111.834 | 120.762 |
| 15582 | ENSG00000164332 | UBLCP1    | 1.1  | 0.0054707 | 0.02265   | 75.980  | 4.657  | 71.109  | 80.388  | 69.621  | 3.666  | 65.692  | 72.949  |
| 15583 | ENSG00000118900 | UBN1      | -1.1 | 0.0007084 | 0.0044129 | 22.235  | 0.637  | 21.773  | 22.962  | 25.811  | 1.985  | 23.519  | 26.992  |
| 15584 | ENSG00000157741 | UBN2      | 1.1  | 0.0738512 | 0.1705415 | 11.137  | 0.191  | 10.966  | 11.342  | 10.693  | 0.459  | 10.388  | 11.221  |
| 15585 | ENSG00000153560 | UBP1      | 1.1  | 0.0013281 | 0.0073485 | 35.066  | 1.700  | 33.114  | 36.224  | 32.214  | 1.365  | 30.778  | 33.494  |
| 15586 | ENSG00000160803 | UBQLN4    | -1.1 | 0.0094987 | 0.0349322 | 28.340  | 1.761  | 26.670  | 30.179  | 32.305  | 0.683  | 31.709  | 33.050  |

|       | A               | B             | C    | D         | E         | F       | G      | H       | I       | J       | K      | L       | M       |
|-------|-----------------|---------------|------|-----------|-----------|---------|--------|---------|---------|---------|--------|---------|---------|
| 15587 | ENSG00000241627 | UBQLN4P1      | -1.3 | 0.0027611 | 0.0132027 | 11.677  | 0.877  | 10.821  | 12.574  | 15.078  | 0.531  | 14.471  | 15.458  |
| 15588 | ENSG00000144357 | UBR3          | -1.1 | 0.1163069 | 0.2376009 | 14.051  | 0.375  | 13.710  | 14.452  | 15.287  | 0.850  | 14.322  | 15.921  |
| 15589 | ENSG00000127481 | UBR4          | -1.3 | 1.49E-12  | 1.591E-10 | 44.043  | 1.203  | 42.772  | 45.163  | 58.750  | 2.654  | 55.883  | 61.121  |
| 15590 | ENSG00000104517 | UBR5          | -1.2 | 7.507E-10 | 3.836E-08 | 91.428  | 2.792  | 88.564  | 94.142  | 114.635 | 4.509  | 109.641 | 118.409 |
| 15591 | ENSG00000012963 | UBR7          | 1.1  | 0.0041874 | 0.0184193 | 43.881  | 1.958  | 41.847  | 45.754  | 40.184  | 0.364  | 39.802  | 40.528  |
| 15592 | ENSG00000165886 | UBTD1         | -1.1 | 0.0968172 | 0.2083834 | 23.845  | 1.311  | 23.036  | 25.358  | 26.884  | 1.330  | 25.398  | 27.961  |
| 15593 | ENSG00000108312 | UBTF          | 1.2  | 2.908E-05 | 0.0003251 | 39.416  | 2.259  | 36.821  | 40.948  | 34.260  | 2.407  | 32.480  | 36.998  |
| 15594 | ENSG00000162191 | UBXN1         | -1.1 | 0.0135014 | 0.0464026 | 73.068  | 0.689  | 72.353  | 73.728  | 81.162  | 1.984  | 78.896  | 82.585  |
| 15596 | ENSG00000162543 | UBXN10        | -1.7 | 0.052743  | 0.1323897 | 0.248   | 0.082  | 0.159   | 0.321   | 0.428   | 0.061  | 0.359   | 0.477   |
| 15597 | ENSG00000173960 | UBXN2A        | 1.1  | 0.0082458 | 0.0312904 | 11.755  | 1.328  | 10.391  | 13.044  | 10.473  | 0.257  | 10.290  | 10.767  |
| 15598 | ENSG00000215114 | UBXN2B        | 1.2  | 0.0004322 | 0.0029739 | 26.684  | 1.660  | 24.801  | 27.940  | 23.696  | 0.570  | 23.039  | 24.054  |
| 15599 | ENSG00000144224 | UBXN4         | 1.1  | 0.0005977 | 0.0038731 | 102.573 | 3.403  | 99.994  | 106.430 | 94.920  | 1.470  | 93.864  | 96.600  |
| 15600 | ENSG00000163960 | UBXN7         | -1.1 | 0.0003473 | 0.0024865 | 50.204  | 1.586  | 48.709  | 51.868  | 57.083  | 1.848  | 55.884  | 59.211  |
| 15601 | ENSG00000154277 | UCHL1         | 1.1  | 0.0001895 | 0.0015281 | 500.374 | 14.142 | 484.104 | 509.709 | 463.561 | 11.142 | 451.199 | 472.829 |
| 15603 | ENSG00000118939 | UCHL3         | -1.1 | 0.1070716 | 0.224066  | 11.613  | 0.520  | 11.083  | 12.122  | 13.324  | 0.944  | 12.391  | 14.280  |
| 15604 | ENSG00000130717 | UCK1          | -1.1 | 0.0288909 | 0.0838134 | 25.105  | 1.221  | 23.722  | 26.036  | 28.481  | 0.328  | 28.103  | 28.684  |
| 15605 | ENSG00000165623 | UCMA          | -1.9 | 0.0003397 | 0.0024416 | 3.276   | 0.626  | 2.671   | 3.921   | 6.420   | 1.207  | 5.058   | 7.358   |
| 15607 | ENSG00000070010 | UFD1          | -1.1 | 0.0096878 | 0.0355036 | 13.882  | 0.521  | 13.301  | 14.308  | 15.793  | 1.310  | 14.310  | 16.793  |
| 15608 | ENSG00000014123 | UFL1          | 1.1  | 0.0095934 | 0.0352323 | 44.353  | 1.339  | 43.420  | 45.887  | 41.287  | 2.247  | 39.729  | 43.863  |
| 15609 | ENSG00000120686 | UFM1          | -1.1 | 0.0014593 | 0.0079055 | 58.067  | 2.441  | 56.575  | 60.884  | 67.455  | 6.994  | 62.038  | 75.350  |
| 15610 | ENSG00000176125 | UFSP1         | 1.4  | 0.0848223 | 0.1896113 | 4.065   | 0.373  | 3.706   | 4.450   | 3.040   | 0.246  | 2.807   | 3.298   |
| 15611 | ENSG00000148154 | UGCG          | -1.1 | 0.1127622 | 0.232324  | 28.156  | 0.873  | 27.214  | 28.940  | 30.515  | 0.698  | 29.714  | 30.991  |
| 15612 | ENSG00000109814 | UGDH          | 1.1  | 0.0590049 | 0.1437761 | 56.737  | 2.411  | 53.984  | 58.475  | 54.369  | 2.697  | 51.407  | 56.683  |
| 15613 | ENSG00000136731 | UGGT1         | 1.2  | 1.229E-05 | 0.000159  | 32.333  | 1.856  | 31.060  | 34.462  | 28.305  | 0.317  | 27.954  | 28.572  |
| 15614 | ENSG00000102595 | UGGT2         | 1.1  | 0.0641149 | 0.1532578 | 15.421  | 1.063  | 14.300  | 16.415  | 14.600  | 0.315  | 14.241  | 14.825  |
| 15615 | ENSG00000169764 | UGP2          | -1.1 | 0.0305896 | 0.0875792 | 421.591 | 4.988  | 416.158 | 425.963 | 454.212 | 7.038  | 448.010 | 461.861 |
| 15616 | ENSG00000168671 | UGT3A2        | 1.2  | 0.0021859 | 0.0108638 | 32.594  | 0.653  | 32.143  | 33.343  | 28.953  | 1.984  | 26.921  | 30.885  |
| 15618 | ENSG00000174607 | UGT8          | 1.1  | 0.0023908 | 0.0117171 | 34.891  | 1.404  | 33.871  | 36.493  | 31.784  | 1.371  | 30.787  | 33.347  |
| 15619 | ENSG00000152332 | UHMK1         | -1.3 | 2.656E-08 | 8.672E-07 | 24.474  | 0.496  | 23.921  | 24.879  | 31.506  | 1.709  | 29.730  | 33.139  |
| 15621 | ENSG00000276043 | UHRF1         | 1.3  | 2.202E-05 | 0.0002582 | 11.622  | 0.736  | 10.790  | 12.190  | 9.120   | 0.474  | 8.677   | 9.619   |
| 15622 | ENSG00000065060 | UHRF1BP1      | 1.3  | 9.32E-09  | 3.511E-07 | 26.362  | 2.386  | 23.664  | 28.194  | 20.781  | 0.113  | 20.674  | 20.900  |
| 15623 | ENSG00000111647 | UHRF1BP1<br>L | -1.3 | 1.879E-06 | 3.223E-05 | 16.118  | 0.454  | 15.606  | 16.469  | 20.746  | 1.859  | 19.084  | 22.753  |
| 15624 | ENSG00000087206 | UIMC1         | -1.1 | 0.0080966 | 0.0308716 | 20.937  | 1.287  | 19.460  | 21.823  | 23.938  | 0.384  | 23.496  | 24.193  |
| 15625 | ENSG00000111981 | ULBP1         | 2.2  | 0.0001448 | 0.0012231 | 2.615   | 0.348  | 2.224   | 2.892   | 1.223   | 0.646  | 0.791   | 1.965   |
| 15626 | ENSG00000083290 | ULK2          | 1.2  | 0.0016684 | 0.0088428 | 5.914   | 0.286  | 5.670   | 6.229   | 5.081   | 0.146  | 4.951   | 5.238   |
| 15627 | ENSG00000178081 | ULK4P3        | 1.5  | 0.0367122 | 0.1003684 | 2.347   | 0.225  | 2.193   | 2.605   | 1.620   | 0.094  | 1.537   | 1.723   |
| 15628 | ENSG00000219545 | UMAD1         | 1.1  | 0.0509833 | 0.1289104 | 10.213  | 0.276  | 9.995   | 10.523  | 9.186   | 1.026  | 8.320   | 10.319  |
| 15629 | ENSG00000114491 | UMPS          | 1.1  | 0.0390684 | 0.1050166 | 18.200  | 0.418  | 17.751  | 18.577  | 17.243  | 0.541  | 16.618  | 17.561  |

|       | A               | B         | C    | D         | E         | F       | G     | H       | I       | J       | K     | L       | M       |
|-------|-----------------|-----------|------|-----------|-----------|---------|-------|---------|---------|---------|-------|---------|---------|
| 15630 | ENSG00000109103 | UNC119    | -1.1 | 0.0467929 | 0.1206967 | 24.279  | 0.387 | 24.027  | 24.724  | 26.654  | 0.674 | 26.014  | 27.358  |
| 15631 | ENSG00000198722 | UNC13B    | 1.1  | 0.0443222 | 0.1157724 | 21.735  | 0.263 | 21.476  | 22.001  | 20.904  | 1.056 | 19.972  | 22.051  |
| 15632 | ENSG00000113763 | UNC5A     | -1.4 | 0.0010943 | 0.0063294 | 4.420   | 0.598 | 3.864   | 5.054   | 6.128   | 0.249 | 5.862   | 6.355   |
| 15633 | ENSG00000107731 | UNC5B     | 1.1  | 0.0072738 | 0.028346  | 28.969  | 1.278 | 28.057  | 30.429  | 26.516  | 2.227 | 24.907  | 29.058  |
| 15634 | ENSG00000182168 | UNC5C     | -2.8 | 0.0002043 | 0.0016197 | 0.115   | 0.028 | 0.084   | 0.138   | 0.334   | 0.057 | 0.276   | 0.390   |
| 15635 | ENSG00000156687 | UNC5D     | -1.2 | 3.663E-05 | 0.0003944 | 20.680  | 1.640 | 19.491  | 22.551  | 25.035  | 1.693 | 23.088  | 26.158  |
| 15636 | ENSG00000076248 | UNG       | 1.1  | 0.0036944 | 0.0166446 | 159.442 | 8.601 | 149.658 | 165.812 | 148.224 | 6.540 | 140.882 | 153.424 |
| 15637 | ENSG00000132478 | UNK       | -1.1 | 0.0933829 | 0.2033195 | 11.891  | 0.665 | 11.123  | 12.296  | 13.145  | 0.566 | 12.513  | 13.606  |
| 15638 | ENSG00000005007 | UPF1      | -1.1 | 0.0003974 | 0.0027834 | 41.427  | 1.500 | 40.207  | 43.102  | 47.697  | 2.261 | 45.940  | 50.248  |
| 15640 | ENSG00000214832 | UPF3AP2   | 1.3  | 0.0043004 | 0.0188036 | 14.890  | 0.885 | 14.210  | 15.890  | 12.031  | 0.362 | 11.816  | 12.449  |
| 15641 | ENSG00000105668 | UPK1A     | -2.2 | 0.0019791 | 0.0100882 | 1.083   | 0.493 | 0.654   | 1.621   | 2.440   | 0.745 | 1.946   | 3.297   |
| 15642 | ENSG00000226510 | UPK1A-AS1 | -1.4 | 0.1018351 | 0.21594   | 2.110   | 0.378 | 1.687   | 2.414   | 3.135   | 0.508 | 2.754   | 3.712   |
| 15643 | ENSG00000243566 | UPK3B     | -1.4 | 0.0268467 | 0.0791319 | 1.954   | 0.622 | 1.333   | 2.576   | 2.780   | 0.244 | 2.499   | 2.940   |
| 15644 | ENSG00000183696 | UPP1      | 1.9  | 9.37E-14  | 1.34E-11  | 23.477  | 2.495 | 21.353  | 26.226  | 12.855  | 0.984 | 11.740  | 13.600  |
| 15645 | ENSG00000094841 | UPRT      | 1.1  | 0.1145705 | 0.2348764 | 15.658  | 0.639 | 14.925  | 16.097  | 14.581  | 1.340 | 13.066  | 15.612  |
| 15646 | ENSG00000101019 | UQCC1     | -1.2 | 5.847E-08 | 1.705E-06 | 30.090  | 1.310 | 28.581  | 30.935  | 38.315  | 1.546 | 36.798  | 39.888  |
| 15647 | ENSG00000204922 | UQCC3     | -1.1 | 0.0897599 | 0.1977712 | 15.010  | 0.902 | 14.161  | 15.957  | 16.989  | 0.626 | 16.450  | 17.675  |
| 15648 | ENSG00000184076 | UQCR10    | -1.1 | 0.0082448 | 0.0312904 | 172.095 | 6.949 | 166.075 | 179.699 | 194.325 | 9.455 | 184.952 | 203.859 |
| 15649 | ENSG00000156467 | UQCRB     | -1.1 | 0.0016884 | 0.0089239 | 53.408  | 1.502 | 51.741  | 54.656  | 60.120  | 2.087 | 57.743  | 61.651  |
| 15650 | ENSG00000237748 | UQCRBP1   | -1.2 | 0.1056356 | 0.2217109 | 27.809  | 3.385 | 25.577  | 31.704  | 34.256  | 1.142 | 33.278  | 35.511  |
| 15652 | ENSG00000140740 | UQCRC2    | -1.1 | 0.0155908 | 0.0520121 | 89.339  | 0.454 | 89.006  | 89.856  | 97.397  | 1.418 | 95.807  | 98.532  |
| 15653 | ENSG00000169021 | UQCRFS1   | -1.1 | 0.0060823 | 0.0246275 | 77.612  | 1.579 | 75.864  | 78.935  | 87.338  | 7.388 | 79.259  | 93.749  |
| 15654 | ENSG00000233954 | UQCRHL    | 1.1  | 0.0317897 | 0.0903601 | 128.161 | 3.518 | 124.359 | 131.300 | 122.240 | 5.910 | 117.299 | 128.787 |
| 15655 | ENSG00000164405 | UQCRQ     | -1.1 | 0.1174913 | 0.2393268 | 73.319  | 1.594 | 71.962  | 75.074  | 79.634  | 2.815 | 76.489  | 81.918  |
| 15656 | ENSG00000222019 | URAFP     | 1.4  | 0.0130994 | 0.0453067 | 3.145   | 0.209 | 2.966   | 3.374   | 2.264   | 0.232 | 1.997   | 2.406   |
| 15657 | ENSG00000142207 | URB1      | -1.1 | 0.0001676 | 0.001381  | 16.908  | 0.421 | 16.564  | 17.378  | 19.805  | 1.179 | 18.455  | 20.633  |
| 15658 | ENSG00000135763 | URB2      | -1.1 | 0.1020013 | 0.2161839 | 16.619  | 0.375 | 16.372  | 17.050  | 18.111  | 0.692 | 17.353  | 18.710  |
| 15659 | ENSG00000106608 | URGCP     | 1.1  | 0.0682007 | 0.1606517 | 7.934   | 0.519 | 7.335   | 8.258   | 7.368   | 0.116 | 7.259   | 7.490   |
| 15661 | ENSG00000167118 | URM1      | -1.1 | 0.0271662 | 0.0798647 | 16.015  | 0.262 | 15.828  | 16.315  | 18.134  | 1.627 | 16.689  | 19.896  |
| 15662 | ENSG00000126088 | UROD      | 1.2  | 0.0005224 | 0.0034706 | 40.718  | 1.255 | 39.450  | 41.960  | 35.722  | 1.096 | 34.606  | 36.796  |
| 15663 | ENSG00000188690 | UROS      | 1.2  | 0.000589  | 0.003824  | 14.886  | 0.462 | 14.421  | 15.346  | 13.017  | 0.640 | 12.285  | 13.466  |
| 15664 | ENSG00000103005 | USB1      | 1.1  | 0.019336  | 0.0613563 | 17.451  | 0.376 | 17.060  | 17.810  | 16.368  | 0.761 | 15.558  | 17.069  |
| 15665 | ENSG00000053501 | USE1      | 1.2  | 0.0778029 | 0.177486  | 10.276  | 0.680 | 9.867   | 11.061  | 9.112   | 0.773 | 8.299   | 9.838   |
| 15666 | ENSG00000103194 | USP10     | 1    | 0.1144103 | 0.2345765 | 78.402  | 1.728 | 76.473  | 79.810  | 76.775  | 1.611 | 75.752  | 78.633  |
| 15667 | ENSG00000058056 | USP13     | 1.1  | 0.0511379 | 0.129224  | 27.054  | 1.039 | 26.408  | 28.253  | 25.907  | 0.699 | 25.112  | 26.425  |
| 15668 | ENSG00000135655 | USP15     | -1.1 | 0.0183507 | 0.0589711 | 5.684   | 0.529 | 5.171   | 6.227   | 6.475   | 0.081 | 6.411   | 6.566   |
| 15670 | ENSG00000184979 | USP18     | 1.5  | 0.0191171 | 0.0608398 | 1.940   | 0.348 | 1.538   | 2.142   | 1.271   | 0.418 | 0.798   | 1.589   |
| 15671 | ENSG00000172046 | USP19     | -1.2 | 3.027E-05 | 0.0003359 | 30.454  | 1.672 | 28.873  | 32.203  | 36.684  | 2.034 | 34.604  | 38.670  |
| 15672 | ENSG00000036672 | USP2      | -1.4 | 0.0126925 | 0.0441339 | 1.806   | 0.081 | 1.725   | 1.887   | 2.531   | 0.883 | 1.985   | 3.550   |
| 15673 | ENSG00000155313 | USP25     | 1.2  | 1.514E-06 | 2.687E-05 | 40.248  | 1.284 | 38.898  | 41.453  | 34.597  | 1.229 | 33.291  | 35.733  |
| 15674 | ENSG00000048028 | USP28     | 1.1  | 0.0461476 | 0.1193965 | 94.090  | 2.866 | 90.797  | 96.022  | 91.111  | 1.386 | 89.557  | 92.218  |
| 15675 | ENSG00000140455 | USP3      | 1.1  | 0.0184222 | 0.0591655 | 8.032   | 0.427 | 7.569   | 8.411   | 7.238   | 0.511 | 6.881   | 7.824   |

|       | A               | B      | C    | D         | E         | F       | G      | H       | I       | J       | K      | L       | M       |
|-------|-----------------|--------|------|-----------|-----------|---------|--------|---------|---------|---------|--------|---------|---------|
| 15676 | ENSG00000103404 | USP31  | 1.1  | 0.0072424 | 0.0282561 | 5.929   | 0.396  | 5.517   | 6.307   | 5.289   | 0.075  | 5.234   | 5.374   |
| 15677 | ENSG00000170832 | USP32  | 1.1  | 0.0160568 | 0.0533219 | 63.981  | 5.340  | 59.933  | 70.032  | 59.284  | 5.511  | 53.142  | 63.794  |
| 15678 | ENSG00000118369 | USP35  | -1.3 | 0.0048746 | 0.0207564 | 4.380   | 0.564  | 3.924   | 5.011   | 5.619   | 0.273  | 5.312   | 5.836   |
| 15679 | ENSG00000114316 | USP4   | 1.2  | 0.0001094 | 0.0009706 | 22.982  | 1.307  | 21.684  | 24.298  | 20.024  | 0.791  | 19.353  | 20.896  |
| 15680 | ENSG00000106346 | USP42  | -1.1 | 0.0291327 | 0.0843702 | 7.178   | 0.188  | 7.061   | 7.394   | 8.292   | 0.865  | 7.730   | 9.288   |
| 15681 | ENSG00000136014 | USP44  | 1    | 0.109249  | 0.2273289 | 112.816 | 2.457  | 110.325 | 115.238 | 110.426 | 4.815  | 105.164 | 114.613 |
| 15682 | ENSG00000109189 | USP46  | -1.2 | 1.988E-08 | 6.699E-07 | 26.914  | 1.196  | 25.896  | 28.231  | 34.124  | 0.880  | 33.160  | 34.886  |
| 15684 | ENSG00000170242 | USP47  | 1.1  | 0.025496  | 0.0760788 | 18.238  | 0.861  | 17.652  | 19.226  | 17.224  | 0.647  | 16.542  | 17.829  |
| 15686 | ENSG00000247746 | USP51  | 1.2  | 0.0012735 | 0.0071228 | 9.570   | 0.701  | 8.979   | 10.345  | 7.901   | 0.636  | 7.169   | 8.316   |
| 15687 | ENSG00000145390 | USP53  | 1.3  | 6.194E-07 | 1.287E-05 | 10.308  | 0.310  | 10.086  | 10.663  | 8.274   | 0.405  | 8.031   | 8.742   |
| 15688 | ENSG00000166348 | USP54  | 1.3  | 1.938E-07 | 4.841E-06 | 17.197  | 0.406  | 16.742  | 17.521  | 13.875  | 0.926  | 13.037  | 14.869  |
| 15689 | ENSG00000124486 | USP9X  | -1.1 | 0.0052498 | 0.0219071 | 276.222 | 26.388 | 249.152 | 301.871 | 311.110 | 6.479  | 306.282 | 318.474 |
| 15690 | ENSG00000132952 | USPL1  | -1.1 | 0.1132441 | 0.2330325 | 19.630  | 1.167  | 18.285  | 20.381  | 21.453  | 0.882  | 20.484  | 22.208  |
| 15691 | ENSG00000111962 | UST    | -1.3 | 4.383E-07 | 9.65E-06  | 33.474  | 3.534  | 30.759  | 37.469  | 46.016  | 3.955  | 42.713  | 50.399  |
| 15692 | ENSG00000183520 | UTP11  | 1.1  | 0.0152489 | 0.0511107 | 38.549  | 1.481  | 36.971  | 39.910  | 35.959  | 0.645  | 35.577  | 36.703  |
| 15693 | ENSG0000011260  | UTP18  | -1.1 | 0.002312  | 0.0114    | 76.606  | 4.041  | 72.330  | 80.361  | 87.185  | 0.806  | 86.468  | 88.057  |
| 15694 | ENSG00000141076 | UTP4   | -1.1 | 0.003647  | 0.0164835 | 26.481  | 0.881  | 25.859  | 27.488  | 30.308  | 1.449  | 29.083  | 31.907  |
| 15695 | ENSG00000108651 | UTP6   | -1.1 | 0.0011891 | 0.006753  | 29.124  | 1.465  | 28.180  | 30.811  | 33.325  | 0.442  | 32.962  | 33.817  |
| 15696 | ENSG00000152818 | UTRN   | -1.1 | 0.0001501 | 0.0012595 | 38.457  | 0.235  | 38.199  | 38.660  | 44.102  | 0.858  | 43.234  | 44.950  |
| 15697 | ENSG00000198382 | UVRAG  | 1.1  | 0.0560596 | 0.1385152 | 10.089  | 0.132  | 9.945   | 10.204  | 9.354   | 0.638  | 8.854   | 10.073  |
| 15698 | ENSG00000163945 | UVSSA  | -1.2 | 0.011098  | 0.039616  | 6.204   | 0.262  | 6.032   | 6.505   | 7.354   | 0.590  | 6.735   | 7.910   |
| 15700 | ENSG00000115652 | UXS1   | 1.2  | 7.246E-06 | 0.0001012 | 24.032  | 1.390  | 22.487  | 25.181  | 20.359  | 0.780  | 19.775  | 21.244  |
| 15701 | ENSG00000103043 | VAC14  | 1.1  | 0.0036101 | 0.016343  | 21.632  | 0.070  | 21.569  | 21.708  | 19.776  | 1.081  | 18.592  | 20.712  |
| 15702 | ENSG00000220205 | VAMP2  | -1.1 | 0.0111005 | 0.0396166 | 14.701  | 0.897  | 13.734  | 15.506  | 17.273  | 0.522  | 16.894  | 17.868  |
| 15703 | ENSG00000124333 | VAMP7  | 1.1  | 0.0075259 | 0.0291604 | 45.872  | 1.121  | 45.193  | 47.167  | 42.124  | 0.089  | 42.050  | 42.222  |
| 15704 | ENSG00000101558 | VAPA   | -1.1 | 0.0008899 | 0.0053088 | 29.461  | 0.203  | 29.283  | 29.682  | 33.634  | 2.226  | 31.066  | 35.012  |
| 15705 | ENSG00000204394 | VARS   | -1.1 | 0.0310099 | 0.0885779 | 56.086  | 0.611  | 55.419  | 56.620  | 61.699  | 5.110  | 57.921  | 67.513  |
| 15706 | ENSG00000137411 | VARS2  | -1.1 | 0.0363043 | 0.0995484 | 12.554  | 0.307  | 12.286  | 12.889  | 13.969  | 0.380  | 13.571  | 14.329  |
| 15708 | ENSG00000071246 | VASH1  | 1.2  | 0.0069547 | 0.0273927 | 8.524   | 1.129  | 7.607   | 9.784   | 7.346   | 0.262  | 7.058   | 7.572   |
| 15709 | ENSG00000168140 | VASN   | 1.4  | 3.889E-07 | 8.724E-06 | 24.992  | 2.812  | 21.784  | 27.025  | 17.923  | 1.918  | 15.718  | 19.210  |
| 15710 | ENSG00000125753 | VASP   | 1.1  | 0.0019426 | 0.0099413 | 88.791  | 4.434  | 84.913  | 93.625  | 81.763  | 4.467  | 78.554  | 86.864  |
| 15711 | ENSG00000108828 | VAT1   | 1.2  | 1.985E-07 | 4.934E-06 | 239.829 | 5.546  | 234.857 | 245.811 | 206.436 | 13.500 | 198.460 | 222.023 |
| 15712 | ENSG00000171724 | VAT1L  | 1.7  | 1.29E-17  | 4.94E-15  | 83.271  | 2.930  | 80.021  | 85.708  | 50.334  | 0.638  | 49.676  | 50.950  |
| 15713 | ENSG00000155959 | VBP1   | -1.1 | 0.0013042 | 0.0072498 | 112.770 | 1.172  | 111.575 | 113.917 | 128.946 | 5.676  | 124.363 | 135.296 |
| 15714 | ENSG00000038427 | VCAN   | 1.2  | 4.551E-06 | 6.836E-05 | 122.743 | 3.252  | 120.577 | 126.482 | 108.381 | 3.167  | 104.919 | 111.132 |
| 15716 | ENSG00000035403 | VCL    | 1.6  | 1.55E-20  | 1.19E-17  | 380.572 | 17.235 | 361.458 | 394.929 | 243.557 | 5.456  | 237.581 | 248.271 |
| 15717 | ENSG00000175073 | VCP1P1 | -1.2 | 0.0027073 | 0.0130006 | 6.698   | 0.390  | 6.414   | 7.143   | 7.972   | 0.409  | 7.708   | 8.443   |
| 15718 | ENSG00000100483 | VCPKMT | -1.1 | 0.099393  | 0.2124126 | 12.853  | 0.280  | 12.542  | 13.084  | 14.635  | 0.240  | 14.384  | 14.861  |
| 15719 | ENSG00000112715 | VEGFA  | 1.8  | 4.82E-17  | 1.54E-14  | 16.804  | 1.219  | 15.449  | 17.814  | 9.707   | 0.755  | 9.113   | 10.557  |
| 15720 | ENSG00000173511 | VEGFB  | 1.2  | 0.0351926 | 0.0973113 | 21.926  | 1.058  | 21.229  | 23.143  | 19.373  | 1.809  | 18.294  | 21.461  |
| 15722 | ENSG00000197415 | VEPH1  | 1.3  | 4.526E-05 | 0.0004722 | 7.466   | 0.439  | 6.961   | 7.754   | 5.881   | 0.333  | 5.497   | 6.086   |
| 15724 | ENSG00000028203 | VEZT   | 1.1  | 0.0050699 | 0.0213676 | 21.687  | 0.653  | 21.294  | 22.440  | 19.974  | 0.865  | 19.092  | 20.820  |
| 15725 | ENSG00000128564 | VGF    | 2.9  | 6.045E-07 | 1.262E-05 | 59.389  | 9.605  | 50.249  | 69.400  | 21.305  | 4.044  | 16.656  | 24.009  |



|       | A               | B          | C    | D         | E         | F      | G     | H      | I       | J       | K     | L       | M       |
|-------|-----------------|------------|------|-----------|-----------|--------|-------|--------|---------|---------|-------|---------|---------|
| 15726 | ENSG00000206538 | VGLL3      | 1.4  | 1.391E-07 | 3.625E-06 | 7.618  | 0.355 | 7.289  | 7.995   | 5.713   | 0.446 | 5.252   | 6.143   |
| 15727 | ENSG00000136059 | VILL       | -1.3 | 0.0016299 | 0.0086686 | 1.891  | 0.137 | 1.756  | 2.030   | 2.593   | 0.050 | 2.536   | 2.629   |
| 15729 | ENSG00000114812 | VIPR1      | -1.2 | 0.0346912 | 0.0963119 | 2.943  | 0.215 | 2.699  | 3.107   | 3.554   | 0.065 | 3.491   | 3.622   |
| 15731 | ENSG00000106018 | VIPR2      | -1.5 | 0.0042961 | 0.0187982 | 1.021  | 0.233 | 0.763  | 1.217   | 1.567   | 0.146 | 1.408   | 1.695   |
| 15732 | ENSG00000167397 | VKORC1     | -1.2 | 0.032622  | 0.0921247 | 12.235 | 0.728 | 11.764 | 13.073  | 14.421  | 0.050 | 14.389  | 14.479  |
| 15734 | ENSG00000147852 | VLDLR      | -1.1 | 0.0003539 | 0.0025273 | 29.488 | 1.636 | 27.637 | 30.741  | 34.488  | 2.141 | 32.078  | 36.169  |
| 15735 | ENSG00000236404 | VLDLR-AS1  | 1.1  | 0.0915423 | 0.2007592 | 6.142  | 0.726 | 5.323  | 6.706   | 5.577   | 0.549 | 5.068   | 6.159   |
| 15736 | ENSG00000160131 | VMA21      | -1.1 | 0.0509991 | 0.1289308 | 40.001 | 0.833 | 39.039 | 40.505  | 43.621  | 1.795 | 42.306  | 45.666  |
| 15737 | ENSG00000062716 | VMP1       | 1.1  | 0.0073053 | 0.0284558 | 53.433 | 1.886 | 51.471 | 55.232  | 49.799  | 3.666 | 46.234  | 53.558  |
| 15738 | ENSG00000228038 | VN1R51P    | -1.6 | 0.0010821 | 0.0062717 | 5.221  | 1.404 | 3.941  | 6.723   | 8.648   | 1.025 | 7.779   | 9.778   |
| 15739 | ENSG00000197969 | VPS13A     | 1.1  | 0.0007357 | 0.0045514 | 16.253 | 0.639 | 15.624 | 16.902  | 14.707  | 0.856 | 14.003  | 15.659  |
| 15740 | ENSG00000129003 | VPS13C     | 1.3  | 1.39E-08  | 4.948E-07 | 17.124 | 0.034 | 17.093 | 17.161  | 13.816  | 0.804 | 13.247  | 14.736  |
| 15741 | ENSG00000048707 | VPS13D     | -1.1 | 0.000351  | 0.0025105 | 12.299 | 0.333 | 11.972 | 12.639  | 14.317  | 0.810 | 13.449  | 15.053  |
| 15743 | ENSG00000104142 | VPS18      | 1.1  | 0.0947009 | 0.205554  | 18.412 | 0.481 | 18.067 | 18.962  | 17.357  | 1.097 | 16.157  | 18.309  |
| 15744 | ENSG00000122958 | VPS26A     | 1.1  | 0.0250301 | 0.075046  | 50.258 | 1.382 | 49.399 | 51.852  | 47.389  | 1.816 | 45.348  | 48.826  |
| 15745 | ENSG00000111237 | VPS29      | 1.1  | 0.0048831 | 0.0207786 | 35.097 | 2.462 | 33.014 | 37.815  | 31.514  | 2.176 | 29.030  | 33.082  |
| 15746 | ENSG00000139719 | VPS33A     | 1.2  | 0.0010164 | 0.0059542 | 8.516  | 0.362 | 8.119  | 8.829   | 7.294   | 0.211 | 7.154   | 7.536   |
| 15747 | ENSG00000069329 | VPS35      | 1.1  | 0.0342396 | 0.0953913 | 31.171 | 0.769 | 30.630 | 32.051  | 29.964  | 0.198 | 29.758  | 30.153  |
| 15748 | ENSG00000136100 | VPS36      | 1.4  | 4.497E-09 | 1.855E-07 | 27.938 | 0.644 | 27.365 | 28.635  | 20.512  | 1.831 | 18.637  | 22.296  |
| 15749 | ENSG00000155975 | VPS37A     | 1.1  | 0.0034631 | 0.0158109 | 21.838 | 0.876 | 20.907 | 22.645  | 19.886  | 0.667 | 19.250  | 20.580  |
| 15750 | ENSG00000139722 | VPS37B     | 1.2  | 0.011622  | 0.0411821 | 3.609  | 0.492 | 3.051  | 3.979   | 2.957   | 0.213 | 2.719   | 3.131   |
| 15751 | ENSG00000176428 | VPS37D     | -1.6 | 0.0004139 | 0.0028676 | 3.675  | 0.271 | 3.362  | 3.848   | 6.148   | 0.351 | 5.771   | 6.466   |
| 15752 | ENSG00000006715 | VPS41      | 1.2  | 1.947E-07 | 4.856E-06 | 29.817 | 0.452 | 29.298 | 30.118  | 24.829  | 0.656 | 24.168  | 25.479  |
| 15753 | ENSG00000136631 | VPS45      | 1.2  | 0.0009659 | 0.0056983 | 17.943 | 0.973 | 16.987 | 18.933  | 15.725  | 0.508 | 15.218  | 16.234  |
| 15754 | ENSG00000119541 | VPS4B      | 1.1  | 0.0041933 | 0.0184355 | 36.452 | 0.934 | 35.390 | 37.149  | 33.391  | 1.844 | 31.389  | 35.019  |
| 15756 | ENSG00000004766 | VPS50      | 1.2  | 0.0158923 | 0.0528484 | 5.724  | 0.354 | 5.329  | 6.013   | 5.023   | 0.033 | 4.996   | 5.059   |
| 15757 | ENSG00000149823 | VPS51      | -1.1 | 0.0368039 | 0.1004784 | 33.468 | 1.394 | 31.978 | 34.739  | 37.129  | 2.740 | 33.973  | 38.891  |
| 15758 | ENSG00000223501 | VPS52      | 1.1  | 0.1210921 | 0.2445118 | 22.415 | 1.693 | 20.460 | 23.425  | 21.217  | 1.998 | 19.290  | 23.279  |
| 15760 | ENSG00000141252 | VPS53      | 1.1  | 0.0790562 | 0.1799325 | 3.965  | 0.377 | 3.546  | 4.277   | 3.712   | 0.177 | 3.515   | 3.857   |
| 15761 | ENSG00000163159 | VPS72      | -1.1 | 0.0213881 | 0.066447  | 30.138 | 1.131 | 28.912 | 31.141  | 33.614  | 0.907 | 32.570  | 34.205  |
| 15762 | ENSG00000156931 | VPS8       | 1.1  | 0.0274346 | 0.0804579 | 17.112 | 0.859 | 16.590 | 18.103  | 16.138  | 0.395 | 15.746  | 16.536  |
| 15763 | ENSG00000261373 | VPS9D1-AS1 | -1.2 | 0.1010088 | 0.2145643 | 5.800  | 0.460 | 5.269  | 6.068   | 7.122   | 1.050 | 6.113   | 8.208   |
| 15764 | ENSG00000100749 | VRK1       | 1.1  | 0.1182642 | 0.2403451 | 82.697 | 2.322 | 80.277 | 84.906  | 80.484  | 0.652 | 79.738  | 80.950  |
| 15765 | ENSG00000028116 | VRK2       | 1.1  | 0.096554  | 0.2080205 | 20.511 | 1.384 | 19.361 | 22.048  | 19.239  | 0.948 | 18.146  | 19.834  |
| 15766 | ENSG00000105053 | VRK3       | 1.1  | 0.0901963 | 0.1985836 | 6.632  | 0.590 | 6.179  | 7.300   | 6.171   | 0.417 | 5.690   | 6.434   |
| 15768 | ENSG00000133980 | VRTN       | -1.2 | 4.474E-08 | 1.36E-06  | 99.961 | 5.166 | 94.056 | 103.644 | 127.242 | 9.154 | 116.946 | 134.463 |
| 15769 | ENSG00000101842 | VSIG1      | -1.4 | 0.0057649 | 0.0236541 | 1.821  | 0.069 | 1.764  | 1.897   | 2.580   | 0.043 | 2.531   | 2.612   |
| 15770 | ENSG00000176834 | VSIG10     | 1.2  | 4.368E-06 | 6.601E-05 | 23.329 | 0.862 | 22.382 | 24.070  | 20.020  | 0.517 | 19.427  | 20.379  |
| 15771 | ENSG00000132821 | VSTM2L     | 1.5  | 0.087896  | 0.1945536 | 1.438  | 0.352 | 1.055  | 1.749   | 1.006   | 0.185 | 0.793   | 1.118   |
| 15772 | ENSG00000165633 | VSTM4      | 1.3  | 0.0407817 | 0.1085863 | 1.235  | 0.047 | 1.181  | 1.266   | 0.968   | 0.069 | 0.888   | 1.008   |
| 15773 | ENSG00000179403 | VWA1       | 1.3  | 2.145E-06 | 3.602E-05 | 16.584 | 0.727 | 15.796 | 17.228  | 12.897  | 1.160 | 12.050  | 14.219  |

|       | A               | B       | C    | D          | E         | F       | G     | H       | I       | J       | K     | L       | M       |
|-------|-----------------|---------|------|------------|-----------|---------|-------|---------|---------|---------|-------|---------|---------|
| 15774 | ENSG00000188730 | VWC2    | -1.2 | 0.1165534  | 0.2379321 | 0.826   | 0.139 | 0.712   | 0.980   | 1.015   | 0.033 | 0.990   | 1.052   |
| 15775 | ENSG00000146530 | VWDE    | -1.1 | 0.0358887  | 0.0986488 | 26.022  | 1.436 | 24.524  | 27.387  | 28.832  | 0.686 | 28.260  | 29.593  |
| 15776 | ENSG00000095787 | WAC     | -1.1 | 0.0025617  | 0.0124037 | 41.514  | 2.006 | 40.068  | 43.804  | 46.304  | 0.874 | 45.489  | 47.226  |
| 15777 | ENSG00000254635 | WAC-AS1 | -1.1 | 0.0605557  | 0.1466883 | 17.256  | 1.194 | 16.457  | 18.629  | 19.546  | 0.428 | 19.109  | 19.964  |
| 15778 | ENSG00000062650 | WAPL    | -1.1 | 0.0233616  | 0.0712432 | 41.123  | 1.512 | 39.845  | 42.793  | 44.988  | 1.350 | 43.579  | 46.270  |
| 15780 | ENSG00000140105 | WARS    | 1.6  | 1.71E-18   | 8.06E-16  | 59.268  | 0.348 | 58.867  | 59.496  | 38.170  | 0.571 | 37.738  | 38.817  |
| 15781 | ENSG00000116874 | WARS2   | -1.2 | 0.0028478  | 0.0134877 | 8.021   | 0.212 | 7.834   | 8.252   | 9.996   | 0.168 | 9.838   | 10.173  |
| 15782 | ENSG00000158195 | WASF2   | -1.1 | 0.0060628  | 0.0245664 | 75.848  | 4.250 | 70.961  | 78.679  | 84.565  | 5.192 | 79.948  | 90.186  |
| 15783 | ENSG00000188459 | WASF4P  | -1.2 | 0.0216424  | 0.0670892 | 11.500  | 2.064 | 9.685   | 13.746  | 14.489  | 1.928 | 13.069  | 16.684  |
| 15784 | ENSG00000185596 | WASH3P  | -1.2 | 0.0178518  | 0.0576747 | 15.835  | 0.877 | 14.829  | 16.440  | 18.618  | 0.684 | 18.095  | 19.392  |
| 15785 | ENSG00000182484 | WASH6P  | -1.1 | 0.0668985  | 0.158334  | 4.748   | 0.465 | 4.216   | 5.072   | 5.571   | 0.101 | 5.468   | 5.669   |
| 15786 | ENSG00000227232 | WASH7P  | -1.2 | 0.0211341  | 0.0659121 | 20.137  | 0.926 | 19.381  | 21.170  | 24.143  | 1.296 | 22.674  | 25.127  |
| 15787 | ENSG00000099290 | WASHC2A | 1.3  | 2.011E-10  | 1.219E-08 | 41.552  | 0.915 | 40.937  | 42.604  | 31.688  | 1.581 | 29.890  | 32.860  |
| 15789 | ENSG00000172661 | WASHC2C | 1.4  | 1.96E-12   | 2.037E-10 | 39.383  | 0.348 | 39.132  | 39.781  | 28.736  | 0.600 | 28.370  | 29.428  |
| 15790 | ENSG00000120860 | WASHC3  | 1.5  | 2.007E-05  | 0.0002385 | 7.978   | 0.314 | 7.692   | 8.313   | 5.489   | 0.270 | 5.270   | 5.790   |
| 15791 | ENSG00000164961 | WASHC5  | 1.1  | 0.022736   | 0.0697125 | 46.064  | 2.907 | 43.724  | 49.318  | 43.467  | 1.626 | 42.140  | 45.280  |
| 15792 | ENSG00000084463 | WBP11   | -1.1 | 0.0041064  | 0.0181432 | 72.260  | 2.240 | 69.961  | 74.436  | 80.319  | 1.729 | 78.629  | 82.084  |
| 15793 | ENSG00000166272 | WBP1L   | 1.1  | 0.0154174  | 0.0515925 | 19.887  | 1.164 | 19.153  | 21.229  | 18.075  | 0.696 | 17.309  | 18.669  |
| 15795 | ENSG00000132471 | WBP2    | 1.1  | 0.0041966  | 0.0184357 | 28.517  | 0.884 | 27.620  | 29.389  | 26.094  | 1.161 | 25.192  | 27.404  |
| 15796 | ENSG00000185274 | WBSCR17 | 1.1  | 0.00671259 | 0.1588276 | 27.266  | 1.241 | 26.467  | 28.696  | 25.967  | 0.842 | 25.222  | 26.880  |
| 15797 | ENSG00000085449 | WDFY1   | 1.1  | 1.344E-05  | 0.0001714 | 101.760 | 1.887 | 99.920  | 103.690 | 90.966  | 2.441 | 88.461  | 93.337  |
| 15798 | ENSG00000139668 | WDFY2   | 1.2  | 1.541E-06  | 2.726E-05 | 14.158  | 0.429 | 13.701  | 14.552  | 12.035  | 0.109 | 11.908  | 12.099  |
| 15799 | ENSG00000163625 | WDFY3   | -1.1 | 0.0002506  | 0.0019137 | 13.120  | 0.317 | 12.788  | 13.419  | 15.186  | 0.760 | 14.327  | 15.772  |
| 15801 | ENSG00000198554 | WDHD1   | 1.2  | 2.566E-08  | 8.46E-07  | 89.181  | 5.120 | 83.361  | 92.994  | 73.750  | 2.720 | 72.116  | 76.889  |
| 15802 | ENSG00000143951 | WDPCP   | 1.3  | 0.000131   | 0.0011277 | 3.071   | 0.328 | 2.777   | 3.425   | 2.360   | 0.170 | 2.211   | 2.545   |
| 15803 | ENSG00000071127 | WDR1    | 1.2  | 2.693E-09  | 1.181E-07 | 152.928 | 1.776 | 151.134 | 154.686 | 129.278 | 2.778 | 127.079 | 132.401 |
| 15804 | ENSG00000120008 | WDR11   | 1.1  | 0.0817623  | 0.184601  | 24.216  | 0.572 | 23.556  | 24.554  | 23.451  | 0.524 | 22.853  | 23.827  |
| 15805 | ENSG00000101940 | WDR13   | -1.1 | 0.0716934  | 0.1668801 | 4.697   | 0.409 | 4.232   | 5.003   | 5.379   | 0.470 | 4.869   | 5.793   |
| 15806 | ENSG00000150627 | WDR17   | -1.1 | 0.0543163  | 0.1353745 | 3.958   | 0.124 | 3.816   | 4.047   | 4.604   | 0.287 | 4.276   | 4.809   |
| 15807 | ENSG00000065268 | WDR18   | -1.1 | 0.0163902  | 0.0540998 | 49.386  | 3.601 | 47.136  | 53.539  | 55.801  | 3.376 | 51.920  | 58.061  |
| 15808 | ENSG00000157796 | WDR19   | 1.1  | 0.0479478  | 0.1229631 | 16.144  | 0.509 | 15.658  | 16.673  | 15.292  | 0.417 | 14.821  | 15.617  |
| 15809 | ENSG00000127580 | WDR24   | -1.2 | 0.0017473  | 0.0091632 | 11.164  | 1.173 | 10.008  | 12.353  | 13.857  | 0.546 | 13.323  | 14.413  |
| 15810 | ENSG00000162923 | WDR26   | 1.2  | 2.839E-07  | 6.688E-06 | 51.218  | 3.041 | 48.769  | 54.622  | 43.517  | 1.731 | 41.518  | 44.528  |
| 15811 | ENSG00000184465 | WDR27   | -1.4 | 7.11E-09   | 2.746E-07 | 11.141  | 1.167 | 10.355  | 12.481  | 15.616  | 0.523 | 15.222  | 16.210  |
| 15812 | ENSG00000065183 | WDR3    | -1.1 | 0.0110062  | 0.0393713 | 21.485  | 1.447 | 20.039  | 22.933  | 23.965  | 0.682 | 23.442  | 24.737  |
| 15813 | ENSG00000136709 | WDR33   | -1.1 | 0.0528908  | 0.1326624 | 17.039  | 0.215 | 16.806  | 17.230  | 18.443  | 0.322 | 18.092  | 18.724  |
| 15814 | ENSG00000119333 | WDR34   | 1.1  | 0.0041528  | 0.0183001 | 36.052  | 2.479 | 33.963  | 38.791  | 32.098  | 1.413 | 30.634  | 33.454  |
| 15815 | ENSG00000118965 | WDR35   | 1.4  | 1.232E-10  | 7.832E-09 | 17.875  | 0.104 | 17.758  | 17.956  | 12.871  | 0.682 | 12.415  | 13.655  |
| 15816 | ENSG00000047056 | WDR37   | -1.1 | 0.0409294  | 0.1087742 | 7.436   | 0.512 | 7.059   | 8.019   | 8.589   | 0.158 | 8.409   | 8.704   |
| 15817 | ENSG00000160193 | WDR4    | 1.1  | 0.0701305  | 0.1640777 | 17.669  | 0.922 | 16.759  | 18.604  | 16.365  | 0.472 | 15.880  | 16.823  |
| 15818 | ENSG00000164253 | WDR41   | 1.1  | 0.0388571  | 0.1045303 | 23.963  | 0.403 | 23.525  | 24.317  | 22.772  | 0.894 | 21.740  | 23.313  |
| 15819 | ENSG00000196998 | WDR45   | 1.1  | 0.0607892  | 0.1471487 | 5.851   | 0.532 | 5.257   | 6.283   | 5.195   | 0.520 | 4.607   | 5.594   |
| 15820 | ENSG00000141580 | WDR45B  | -1.1 | 0.0270569  | 0.0796266 | 84.859  | 1.221 | 83.451  | 85.639  | 92.399  | 1.604 | 90.696  | 93.880  |

|       | A               | B            | C    | D         | E         | F      | G     | H      | I      | J       | K     | L       | M       |
|-------|-----------------|--------------|------|-----------|-----------|--------|-------|--------|--------|---------|-------|---------|---------|
| 15821 | ENSG00000265574 | WDR45BP<br>1 | 1.6  | 0.0509084 | 0.1287594 | 2.761  | 0.785 | 1.865  | 3.330  | 1.801   | 0.230 | 1.541   | 1.976   |
| 15822 | ENSG00000196363 | WDR5         | -1.1 | 0.0032825 | 0.015138  | 54.611 | 0.343 | 54.355 | 55.000 | 61.890  | 3.339 | 59.612  | 65.723  |
| 15823 | ENSG00000005448 | WDR54        | -1.3 | 0.0002747 | 0.0020629 | 20.656 | 2.724 | 18.636 | 23.754 | 27.261  | 3.996 | 24.916  | 31.874  |
| 15824 | ENSG00000103091 | WDR59        | -1.1 | 0.020365  | 0.0639617 | 17.491 | 0.502 | 16.998 | 18.001 | 19.379  | 0.511 | 18.889  | 19.909  |
| 15825 | ENSG00000178252 | WDR6         | -1.2 | 8.812E-08 | 2.439E-06 | 92.339 | 1.617 | 91.056 | 94.155 | 112.389 | 3.671 | 109.811 | 116.592 |
| 15826 | ENSG00000126870 | WDR60        | 1.6  | 3.84E-12  | 3.545E-10 | 25.688 | 1.500 | 24.775 | 27.419 | 16.712  | 1.123 | 15.630  | 17.873  |
| 15827 | ENSG00000140395 | WDR61        | -1.1 | 0.0342564 | 0.0954137 | 17.222 | 0.389 | 16.795 | 17.557 | 19.024  | 0.806 | 18.273  | 19.875  |
| 15829 | ENSG00000075702 | WDR62        | -1.1 | 0.0104485 | 0.0378079 | 11.188 | 0.427 | 10.761 | 11.615 | 12.963  | 1.447 | 11.622  | 14.496  |
| 15830 | ENSG00000158023 | WDR66        | 1.9  | 1.513E-06 | 2.687E-05 | 0.946  | 0.109 | 0.823  | 1.027  | 0.518   | 0.106 | 0.414   | 0.626   |
| 15831 | ENSG00000115368 | WDR75        | -1.1 | 0.0027539 | 0.0131758 | 66.906 | 2.142 | 64.964 | 69.203 | 74.828  | 1.565 | 73.021  | 75.735  |
| 15832 | ENSG00000092470 | WDR76        | 1.3  | 9.948E-05 | 0.0009002 | 14.861 | 1.943 | 12.853 | 16.733 | 11.926  | 0.245 | 11.663  | 12.148  |
| 15833 | ENSG00000164091 | WDR82        | -1.1 | 0.0015163 | 0.0081621 | 56.804 | 0.623 | 56.123 | 57.344 | 63.723  | 1.164 | 62.954  | 65.062  |
| 15834 | ENSG00000161996 | WDR90        | -1.1 | 0.1082457 | 0.2258524 | 4.560  | 0.164 | 4.399  | 4.726  | 5.091   | 0.292 | 4.769   | 5.337   |
| 15835 | ENSG00000105875 | WDR91        | 1.1  | 0.047639  | 0.1223566 | 6.368  | 0.548 | 5.923  | 6.980  | 5.744   | 0.295 | 5.450   | 6.041   |
| 15836 | ENSG00000196151 | WDSUB1       | 1.2  | 0.0166987 | 0.0548611 | 15.284 | 0.730 | 14.445 | 15.777 | 13.240  | 1.069 | 12.148  | 14.285  |
| 15837 | ENSG00000142784 | WDC1         | 1.1  | 0.0065051 | 0.0259359 | 17.092 | 0.988 | 16.103 | 18.079 | 15.402  | 0.858 | 14.434  | 16.071  |
| 15838 | ENSG00000166483 | WEE1         | 1.4  | 1.45E-13  | 1.91E-11  | 60.324 | 3.194 | 58.423 | 64.011 | 43.904  | 2.395 | 41.199  | 45.754  |
| 15839 | ENSG00000101443 | WFDC2        | 1.2  | 0.0005591 | 0.0036667 | 49.736 | 3.997 | 45.191 | 52.703 | 41.415  | 0.890 | 40.454  | 42.212  |
| 15840 | ENSG00000261040 | WFDC21P      | 2.4  | 0.0955866 | 0.2068128 | 0.583  | 0.337 | 0.271  | 0.940  | 0.247   | 0.230 | 0.000   | 0.456   |
| 15841 | ENSG00000127578 | WFIKKN1      | -1.3 | 0.0089908 | 0.0333982 | 4.618  | 0.739 | 4.119  | 5.467  | 5.931   | 0.833 | 5.253   | 6.861   |
| 15842 | ENSG00000156232 | WHAMM        | -1.2 | 0.0088594 | 0.033048  | 3.523  | 0.198 | 3.345  | 3.737  | 4.429   | 0.165 | 4.251   | 4.577   |
| 15843 | ENSG00000115935 | WIPF1        | 1.3  | 0.0034416 | 0.015732  | 3.145  | 0.172 | 3.006  | 3.337  | 2.551   | 0.261 | 2.287   | 2.809   |
| 15844 | ENSG00000070540 | WIPI1        | 1.3  | 1.718E-06 | 2.971E-05 | 21.019 | 1.934 | 18.804 | 22.378 | 16.076  | 0.456 | 15.747  | 16.596  |
| 15845 | ENSG00000011451 | WIZ          | -1.2 | 0.0011877 | 0.0067475 | 12.759 | 1.034 | 11.567 | 13.411 | 15.694  | 1.927 | 14.038  | 17.810  |
| 15846 | ENSG00000060237 | WNK1         | 1    | 0.0732506 | 0.1696642 | 61.585 | 2.228 | 59.027 | 63.106 | 60.090  | 2.250 | 58.035  | 62.494  |
| 15847 | ENSG00000165238 | WNK2         | -1.2 | 0.0023905 | 0.0117171 | 11.408 | 0.831 | 10.460 | 12.011 | 13.655  | 1.492 | 12.414  | 15.310  |
| 15848 | ENSG00000134245 | WNT2B        | -1.6 | 0.0017967 | 0.0093445 | 0.440  | 0.061 | 0.376  | 0.498  | 0.717   | 0.103 | 0.606   | 0.810   |
| 15850 | ENSG00000108379 | WNT3         | 1.3  | 0.0480897 | 0.1232493 | 1.504  | 0.191 | 1.295  | 1.669  | 1.176   | 0.140 | 1.075   | 1.335   |
| 15851 | ENSG00000162552 | WNT4         | -2.3 | 1.652E-05 | 0.0002017 | 0.610  | 0.215 | 0.362  | 0.751  | 1.440   | 0.136 | 1.290   | 1.555   |
| 15852 | ENSG00000075290 | WNT8B        | -1.5 | 0.0459434 | 0.119045  | 1.403  | 0.373 | 0.979  | 1.679  | 2.119   | 0.372 | 1.691   | 2.371   |
| 15854 | ENSG00000143816 | WNT9A        | -1.3 | 0.0289183 | 0.0838641 | 2.225  | 0.105 | 2.139  | 2.342  | 2.888   | 0.063 | 2.816   | 2.933   |
| 15855 | ENSG00000141499 | WRAP53       | -1.1 | 0.0139678 | 0.0476875 | 10.395 | 0.109 | 10.274 | 10.485 | 12.056  | 0.510 | 11.468  | 12.368  |
| 15856 | ENSG00000116213 | WRAP73       | -1.2 | 0.0005183 | 0.003454  | 10.811 | 0.128 | 10.667 | 10.912 | 12.966  | 0.345 | 12.642  | 13.328  |
| 15857 | ENSG00000165392 | WRN          | -1.1 | 0.0342364 | 0.0953913 | 42.945 | 2.443 | 41.332 | 45.756 | 47.315  | 3.403 | 43.800  | 50.593  |
| 15858 | ENSG00000124535 | WRNIP1       | -1.3 | 7.389E-06 | 0.0001029 | 21.201 | 0.943 | 20.328 | 22.202 | 27.273  | 1.232 | 25.957  | 28.400  |
| 15859 | ENSG00000109046 | WSB1         | -1.2 | 1.631E-05 | 0.0001994 | 61.510 | 2.705 | 58.718 | 64.118 | 73.220  | 2.542 | 70.381  | 75.285  |
| 15860 | ENSG00000176871 | WSB2         | 1.2  | 0.0003094 | 0.0022661 | 31.224 | 0.988 | 30.118 | 32.018 | 27.419  | 1.587 | 26.410  | 29.249  |
| 15861 | ENSG00000179314 | WSCD1        | -1.4 | 1.892E-07 | 4.748E-06 | 14.027 | 1.528 | 12.713 | 15.704 | 19.447  | 1.888 | 17.288  | 20.785  |
| 15862 | ENSG00000142279 | WTIP         | 1.1  | 0.0742201 | 0.1711362 | 4.386  | 0.168 | 4.193  | 4.497  | 4.037   | 0.550 | 3.460   | 4.555   |
| 15863 | ENSG00000113645 | WWC1         | -1.2 | 0.000375  | 0.0026513 | 10.028 | 1.075 | 8.792  | 10.750 | 12.244  | 1.067 | 11.082  | 13.178  |
| 15865 | ENSG00000047644 | WWC3         | -1.2 | 6.48E-06  | 9.225E-05 | 21.055 | 1.003 | 20.373 | 22.207 | 26.570  | 2.906 | 23.402  | 29.113  |

|       | A               | B       | C    | D         | E         | F       | G     | H       | I       | J       | K     | L       | M       |
|-------|-----------------|---------|------|-----------|-----------|---------|-------|---------|---------|---------|-------|---------|---------|
| 15866 | ENSG00000018408 | WWTR1   | 1.3  | 6.311E-06 | 9E-05     | 13.046  | 1.257 | 11.838  | 14.347  | 10.493  | 0.807 | 9.562   | 10.968  |
| 15867 | ENSG00000076924 | XAB2    | -1.2 | 3.931E-06 | 6.033E-05 | 34.522  | 2.216 | 31.974  | 36.010  | 43.353  | 2.422 | 40.877  | 45.718  |
| 15869 | ENSG00000100219 | XBP1    | 1.2  | 1.384E-06 | 2.495E-05 | 74.465  | 2.952 | 71.967  | 77.723  | 63.102  | 3.583 | 59.340  | 66.475  |
| 15870 | ENSG00000124343 | XG      | -1.5 | 0.001415  | 0.0077222 | 2.402   | 0.324 | 2.148   | 2.768   | 3.744   | 0.543 | 3.369   | 4.367   |
| 15871 | ENSG00000229807 | XIST    | -1.1 | 0.0048338 | 0.020624  | 7.081   | 0.584 | 6.561   | 7.712   | 8.191   | 0.611 | 7.803   | 8.896   |
| 15872 | ENSG00000047597 | XK      | 1.4  | 0.0022306 | 0.0110502 | 2.628   | 0.358 | 2.355   | 3.034   | 1.892   | 0.377 | 1.667   | 2.327   |
| 15873 | ENSG00000206579 | XKR4    | 1.4  | 0.0624007 | 0.1501257 | 0.213   | 0.018 | 0.195   | 0.230   | 0.158   | 0.030 | 0.126   | 0.185   |
| 15874 | ENSG00000275591 | XKR5    | 1.1  | 0.1212023 | 0.2446759 | 6.508   | 0.569 | 5.869   | 6.959   | 5.991   | 0.248 | 5.706   | 6.155   |
| 15875 | ENSG00000260903 | XKR7    | 1.3  | 0.0533964 | 0.1335568 | 1.921   | 0.264 | 1.656   | 2.184   | 1.548   | 0.382 | 1.128   | 1.874   |
| 15877 | ENSG00000158156 | XKR8    | -1.2 | 0.0060841 | 0.0246291 | 14.913  | 0.123 | 14.828  | 15.054  | 18.024  | 1.271 | 16.730  | 19.272  |
| 15879 | ENSG00000221947 | XKR9    | 1.4  | 0.0191552 | 0.0609198 | 2.251   | 0.215 | 2.005   | 2.404   | 1.665   | 0.497 | 1.154   | 2.148   |
| 15880 | ENSG00000136936 | XPA     | 1.2  | 0.0629129 | 0.1511748 | 6.273   | 1.202 | 5.446   | 7.652   | 5.213   | 0.501 | 4.778   | 5.761   |
| 15881 | ENSG00000196236 | XPNPEP3 | -1.1 | 0.0096249 | 0.0353116 | 6.926   | 0.285 | 6.600   | 7.129   | 7.979   | 0.053 | 7.923   | 8.029   |
| 15882 | ENSG00000132953 | XPO4    | 1.1  | 0.0002114 | 0.0016647 | 35.491  | 0.608 | 34.820  | 36.006  | 32.292  | 1.190 | 31.001  | 33.346  |
| 15883 | ENSG00000124571 | XPO5    | -1.1 | 0.0772204 | 0.1764426 | 53.781  | 0.508 | 53.444  | 54.366  | 57.740  | 2.608 | 55.146  | 60.361  |
| 15884 | ENSG00000184575 | XPOT    | 1.3  | 4.92E-13  | 5.62E-11  | 138.430 | 2.061 | 136.590 | 140.657 | 106.639 | 3.872 | 102.552 | 110.253 |
| 15885 | ENSG00000214185 | XPOTP1  | 1.3  | 0.00053   | 0.0035124 | 11.841  | 0.626 | 11.329  | 12.539  | 9.326   | 1.001 | 8.635   | 10.474  |
| 15886 | ENSG00000143324 | XPR1    | -1.1 | 0.000794  | 0.0048428 | 31.680  | 0.857 | 30.841  | 32.554  | 36.208  | 2.122 | 34.556  | 38.601  |
| 15887 | ENSG00000152422 | XRCC4   | -1.1 | 0.047563  | 0.1221801 | 16.589  | 0.655 | 15.900  | 17.203  | 18.854  | 1.049 | 17.642  | 19.462  |
| 15888 | ENSG00000079246 | XRCC5   | -1.1 | 0.000239  | 0.0018431 | 419.693 | 4.493 | 414.607 | 423.124 | 470.012 | 3.939 | 465.835 | 473.659 |
| 15890 | ENSG00000234825 | XRCC6P2 | -1.1 | 0.0169725 | 0.0555449 | 39.398  | 2.472 | 36.628  | 41.376  | 44.986  | 0.789 | 44.393  | 45.881  |
| 15892 | ENSG00000114127 | XRN1    | -1.1 | 0.0204639 | 0.0642326 | 8.793   | 0.338 | 8.555   | 9.180   | 9.934   | 0.507 | 9.449   | 10.460  |
| 15893 | ENSG00000088930 | XRN2    | -1.2 | 3.522E-08 | 1.095E-06 | 206.064 | 5.887 | 201.170 | 212.596 | 249.487 | 2.864 | 246.211 | 251.520 |
| 15894 | ENSG00000173950 | XXYL1   | 1.1  | 0.0189007 | 0.0603259 | 12.405  | 0.330 | 12.174  | 12.783  | 11.262  | 0.743 | 10.644  | 12.086  |
| 15895 | ENSG00000093217 | XYLB    | 1.5  | 0.0051083 | 0.0214812 | 1.441   | 0.213 | 1.299   | 1.687   | 0.971   | 0.253 | 0.756   | 1.249   |
| 15896 | ENSG00000103489 | XYLT1   | -1.2 | 6.19E-05  | 0.0006108 | 8.791   | 0.456 | 8.480   | 9.315   | 10.924  | 1.041 | 9.724   | 11.584  |
| 15897 | ENSG00000015532 | XYLT2   | 1.1  | 0.0093771 | 0.0345673 | 23.435  | 2.094 | 21.626  | 25.729  | 21.356  | 0.810 | 20.434  | 21.951  |
| 15898 | ENSG00000015153 | YAF2    | 1.5  | 0.0271406 | 0.0798035 | 0.337   | 0.034 | 0.300   | 0.368   | 0.227   | 0.057 | 0.188   | 0.293   |
| 15899 | ENSG00000137693 | YAP1    | 1.1  | 0.0318629 | 0.09051   | 112.189 | 3.094 | 109.162 | 115.345 | 108.215 | 1.488 | 107.201 | 109.924 |
| 15900 | ENSG00000134684 | YARS    | 1.3  | 4.375E-10 | 2.349E-08 | 75.607  | 4.669 | 70.227  | 78.583  | 60.539  | 2.773 | 57.661  | 63.192  |
| 15901 | ENSG00000182362 | YBEY    | -1.1 | 0.0867228 | 0.1927388 | 22.891  | 1.906 | 20.695  | 24.119  | 25.959  | 0.144 | 25.792  | 26.044  |
| 15902 | ENSG00000127337 | YEATS4  | -1.1 | 0.0452502 | 0.1177047 | 55.171  | 2.533 | 52.752  | 57.803  | 61.382  | 2.103 | 59.589  | 63.696  |
| 15903 | ENSG00000176105 | YES1    | 1.1  | 0.0254632 | 0.0760477 | 134.493 | 9.953 | 125.647 | 145.271 | 128.193 | 6.703 | 122.555 | 135.604 |
| 15904 | ENSG00000167645 | YIF1B   | 1.1  | 0.0331728 | 0.0932445 | 41.936  | 1.690 | 40.368  | 43.725  | 39.329  | 1.830 | 37.597  | 41.243  |
| 15905 | ENSG00000058799 | YIPF1   | 1.2  | 0.0052976 | 0.022063  | 37.795  | 1.142 | 36.507  | 38.684  | 33.371  | 1.412 | 31.815  | 34.571  |
| 15906 | ENSG00000130733 | YIPF2   | -1.2 | 0.0008132 | 0.004935  | 33.743  | 1.725 | 32.661  | 35.732  | 40.338  | 1.133 | 39.226  | 41.491  |
| 15907 | ENSG00000145817 | YIPF5   | -1.2 | 0.0005859 | 0.0038117 | 32.508  | 1.151 | 31.520  | 33.771  | 38.659  | 2.674 | 36.003  | 41.350  |
| 15908 | ENSG00000250067 | YJEFN3  | 1.3  | 0.0435523 | 0.1142192 | 3.102   | 0.530 | 2.669   | 3.692   | 2.424   | 0.272 | 2.152   | 2.696   |
| 15909 | ENSG00000106636 | YKT6    | -1.1 | 0.0003281 | 0.0023705 | 64.257  | 2.922 | 61.853  | 67.510  | 74.444  | 4.198 | 70.130  | 78.516  |
| 15910 | ENSG00000119596 | YLPM1   | 1.1  | 0.0770705 | 0.1761715 | 23.591  | 1.040 | 22.450  | 24.487  | 22.866  | 0.549 | 22.341  | 23.437  |
| 15911 | ENSG00000136758 | YME1L1  | -1.1 | 0.0281766 | 0.0822819 | 69.309  | 1.183 | 68.542  | 70.672  | 75.106  | 2.005 | 72.897  | 76.811  |
| 15913 | ENSG00000180667 | YOD1    | -1.3 | 3.518E-07 | 7.998E-06 | 15.926  | 0.434 | 15.655  | 16.426  | 21.224  | 1.914 | 19.064  | 22.713  |
| 15916 | ENSG00000175155 | YPEL2   | -1.1 | 0.0802998 | 0.1817381 | 2.273   | 0.158 | 2.166   | 2.455   | 2.660   | 0.181 | 2.491   | 2.851   |

|       | A               | B          | C    | D         | E         | F       | G      | H       | I       | J       | K      | L       | M       |
|-------|-----------------|------------|------|-----------|-----------|---------|--------|---------|---------|---------|--------|---------|---------|
| 15917 | ENSG00000090238 | YPEL3      | -1.3 | 0.0005189 | 0.003456  | 10.864  | 0.288  | 10.632  | 11.186  | 14.050  | 1.836  | 12.645  | 16.127  |
| 15918 | ENSG00000119801 | YPEL5      | 1.2  | 1.552E-06 | 2.741E-05 | 39.665  | 1.594  | 38.152  | 41.329  | 32.576  | 0.967  | 31.904  | 33.684  |
| 15919 | ENSG00000196449 | YRDC       | -1.3 | 0.0006376 | 0.004074  | 23.108  | 3.303  | 19.337  | 25.486  | 29.647  | 3.513  | 27.131  | 33.661  |
| 15921 | ENSG00000083896 | YTHDC1     | -1.1 | 0.0038407 | 0.017171  | 61.765  | 1.649  | 60.532  | 63.638  | 68.754  | 1.932  | 66.634  | 70.414  |
| 15927 | ENSG00000047188 | YTHDC2     | 1.3  | 9.706E-07 | 1.861E-05 | 14.298  | 0.959  | 13.227  | 15.080  | 11.586  | 0.460  | 11.125  | 12.045  |
| 15928 | ENSG00000270673 | YTHDF3-AS1 | -1.5 | 0.0725149 | 0.1682826 | 2.681   | 1.346  | 1.440   | 4.113   | 4.229   | 1.056  | 3.028   | 5.010   |
| 15929 | ENSG00000166913 | YWHAB      | 1.2  | 2.075E-07 | 5.103E-06 | 121.134 | 2.022  | 118.824 | 122.579 | 105.785 | 3.310  | 102.045 | 108.336 |
| 15930 | ENSG00000108953 | YWHAE      | -1.1 | 0.0011253 | 0.0064671 | 663.454 | 10.567 | 657.180 | 675.654 | 734.155 | 6.853  | 729.571 | 742.033 |
| 15932 | ENSG00000128245 | YWHAH      | -1.1 | 0.0022782 | 0.0112533 | 195.595 | 4.250  | 191.523 | 200.003 | 218.059 | 4.185  | 213.626 | 221.942 |
| 15934 | ENSG00000134308 | YWHAQ      | -1.1 | 0.0076606 | 0.0295808 | 467.592 | 14.024 | 455.610 | 483.016 | 511.500 | 13.761 | 499.614 | 526.576 |
| 15935 | ENSG00000100811 | YY1        | -1.1 | 0.0003836 | 0.0027022 | 50.965  | 1.802  | 49.274  | 52.861  | 58.035  | 2.592  | 55.049  | 59.708  |
| 15938 | ENSG00000163374 | YY1AP1     | -1.1 | 0.0049684 | 0.021042  | 17.532  | 0.919  | 16.702  | 18.520  | 20.423  | 0.895  | 19.693  | 21.421  |
| 15939 | ENSG00000132846 | ZBED3      | 1.4  | 7.172E-06 | 0.0001003 | 7.195   | 0.739  | 6.618   | 8.028   | 5.201   | 0.401  | 4.765   | 5.555   |
| 15940 | ENSG00000250802 | ZBED3-AS1  | 1.6  | 0.0004482 | 0.0030555 | 1.653   | 0.274  | 1.337   | 1.816   | 1.049   | 0.052  | 1.005   | 1.107   |
| 15941 | ENSG00000100426 | ZBED4      | -1.2 | 7.552E-05 | 0.0007184 | 24.850  | 1.515  | 23.105  | 25.832  | 29.815  | 1.581  | 28.264  | 31.425  |
| 15942 | ENSG00000188707 | ZBED6CL    | -1.2 | 0.0332098 | 0.0933018 | 6.328   | 0.515  | 5.740   | 6.699   | 7.901   | 1.795  | 6.036   | 9.616   |
| 15943 | ENSG00000126804 | ZBTB1      | 1.1  | 0.0912909 | 0.2004678 | 22.104  | 0.450  | 21.617  | 22.504  | 21.112  | 0.249  | 20.901  | 21.386  |
| 15944 | ENSG00000204366 | ZBTB12     | -1.2 | 0.0002347 | 0.0018169 | 33.942  | 1.226  | 32.915  | 35.300  | 41.563  | 1.236  | 40.320  | 42.791  |
| 15946 | ENSG00000116809 | ZBTB17     | -1.2 | 0.0009781 | 0.0057581 | 10.005  | 0.532  | 9.617   | 10.612  | 12.705  | 1.597  | 11.135  | 14.327  |
| 15947 | ENSG00000179456 | ZBTB18     | -1.2 | 0.0024719 | 0.0120552 | 16.141  | 0.327  | 15.944  | 16.518  | 19.098  | 0.385  | 18.671  | 19.420  |
| 15948 | ENSG00000173276 | ZBTB21     | 1.2  | 0.0007385 | 0.0045621 | 12.850  | 0.804  | 11.941  | 13.469  | 11.070  | 0.572  | 10.573  | 11.696  |
| 15949 | ENSG00000171448 | ZBTB26     | -1.2 | 0.0021509 | 0.0107311 | 19.598  | 1.065  | 18.860  | 20.820  | 23.140  | 1.502  | 21.431  | 24.252  |
| 15950 | ENSG00000185670 | ZBTB3      | -1.1 | 0.0641016 | 0.1532578 | 11.134  | 0.179  | 10.988  | 11.334  | 12.785  | 1.026  | 11.772  | 13.823  |
| 15951 | ENSG00000177125 | ZBTB34     | -1.1 | 0.008239  | 0.0312904 | 16.211  | 0.302  | 15.946  | 16.539  | 18.500  | 1.202  | 17.496  | 19.831  |
| 15952 | ENSG00000185278 | ZBTB37     | -1.2 | 9.243E-05 | 0.0008482 | 7.620   | 0.266  | 7.432   | 7.924   | 9.148   | 0.637  | 8.561   | 9.826   |
| 15953 | ENSG00000177311 | ZBTB38     | 1.3  | 2.013E-05 | 0.0002385 | 5.428   | 0.262  | 5.126   | 5.591   | 4.386   | 0.360  | 4.066   | 4.776   |
| 15955 | ENSG00000166860 | ZBTB39     | -1.1 | 0.0085971 | 0.0322616 | 23.092  | 2.660  | 20.029  | 24.823  | 26.475  | 0.942  | 25.573  | 27.452  |
| 15957 | ENSG00000184677 | ZBTB40     | -1.5 | 5.50E-11  | 3.842E-09 | 8.804   | 1.156  | 7.655   | 9.967   | 13.777  | 0.589  | 13.126  | 14.272  |
| 15958 | ENSG00000169155 | ZBTB43     | -1.2 | 0.0001138 | 0.0010028 | 8.795   | 0.314  | 8.548   | 9.148   | 10.951  | 0.504  | 10.531  | 11.510  |
| 15959 | ENSG00000196323 | ZBTB44     | -1.4 | 1.22E-11  | 9.954E-10 | 30.469  | 1.412  | 29.475  | 32.085  | 42.178  | 2.481  | 40.281  | 44.986  |
| 15961 | ENSG00000114853 | ZBTB47     | -1.2 | 0.1141666 | 0.2342562 | 3.839   | 0.490  | 3.358   | 4.337   | 4.572   | 0.596  | 4.149   | 5.253   |
| 15963 | ENSG00000168795 | ZBTB5      | -1.1 | 0.0020102 | 0.0102016 | 26.349  | 1.000  | 25.672  | 27.498  | 30.479  | 0.946  | 29.469  | 31.343  |
| 15964 | ENSG00000273274 | ZBTB8B     | -1.3 | 9.473E-06 | 0.0001277 | 2.735   | 0.034  | 2.705   | 2.773   | 3.735   | 0.061  | 3.666   | 3.784   |
| 15965 | ENSG00000176261 | ZBTB8OS    | 1.1  | 0.0810192 | 0.1831188 | 20.623  | 2.058  | 18.294  | 22.194  | 19.124  | 2.272  | 16.632  | 21.079  |
| 15967 | ENSG00000104427 | ZC2HC1A    | 1.4  | 3.034E-06 | 4.822E-05 | 16.782  | 0.754  | 15.926  | 17.350  | 12.646  | 0.532  | 12.334  | 13.260  |
| 15968 | ENSG00000135482 | ZC3H10     | -1.2 | 0.003464  | 0.0158109 | 3.040   | 0.114  | 2.950   | 3.168   | 3.787   | 0.284  | 3.468   | 4.010   |
| 15969 | ENSG00000215817 | ZC3H11B    | -1.3 | 0.0005863 | 0.0038117 | 5.343   | 0.504  | 4.777   | 5.741   | 7.045   | 0.586  | 6.635   | 7.717   |
| 15971 | ENSG00000163874 | ZC3H12A    | 1.2  | 0.0081998 | 0.0311979 | 10.440  | 1.397  | 9.231   | 11.969  | 8.819   | 0.582  | 8.210   | 9.371   |
| 15974 | ENSG00000149289 | ZC3H12C    | 1.3  | 6.392E-05 | 0.0006278 | 3.292   | 0.045  | 3.253   | 3.342   | 2.498   | 0.228  | 2.301   | 2.747   |
| 15976 | ENSG00000100722 | ZC3H14     | 1.1  | 0.0266255 | 0.0786442 | 13.645  | 0.596  | 13.104  | 14.283  | 13.026  | 0.326  | 12.674  | 13.318  |
| 15977 | ENSG00000065548 | ZC3H15     | -1.1 | 0.0882219 | 0.1951474 | 87.005  | 4.546  | 82.829  | 91.847  | 94.072  | 1.397  | 92.981  | 95.646  |

|       | A               | B        | C    | D         | E         | F       | G     | H       | I       | J       | K      | L       | M       |
|-------|-----------------|----------|------|-----------|-----------|---------|-------|---------|---------|---------|--------|---------|---------|
| 15978 | ENSG00000158545 | ZC3H18   | -1.1 | 0.0007467 | 0.0045992 | 17.718  | 0.545 | 17.289  | 18.330  | 20.756  | 1.138  | 19.448  | 21.517  |
| 15980 | ENSG00000014164 | ZC3H3    | -1.1 | 0.0290436 | 0.0841553 | 12.855  | 0.360 | 12.632  | 13.270  | 14.870  | 1.064  | 13.736  | 15.845  |
| 15982 | ENSG00000188177 | ZC3H6    | -1.3 | 2.498E-06 | 4.113E-05 | 6.885   | 0.212 | 6.715   | 7.122   | 9.037   | 0.710  | 8.573   | 9.855   |
| 15984 | ENSG00000122299 | ZC3H7A   | -1.2 | 0.0001667 | 0.0013757 | 23.406  | 1.089 | 22.171  | 24.225  | 27.923  | 1.294  | 27.061  | 29.410  |
| 15986 | ENSG00000100403 | ZC3H7B   | 1.1  | 0.0071891 | 0.0281132 | 42.687  | 1.285 | 41.214  | 43.584  | 40.319  | 1.706  | 38.388  | 41.622  |
| 15989 | ENSG00000105939 | ZC3HAV1  | 1.1  | 0.0123182 | 0.0430773 | 26.297  | 0.398 | 25.871  | 26.660  | 24.598  | 1.446  | 22.985  | 25.780  |
| 15990 | ENSG00000134744 | ZCCHC11  | -1.1 | 0.0612723 | 0.1480002 | 12.972  | 0.323 | 12.751  | 13.343  | 14.141  | 0.342  | 13.776  | 14.454  |
| 15991 | ENSG00000140948 | ZCCHC14  | -1.3 | 8.556E-07 | 1.677E-05 | 13.477  | 0.646 | 12.731  | 13.865  | 17.677  | 1.360  | 16.455  | 19.142  |
| 15992 | ENSG00000247315 | ZCCHC3   | -1.1 | 0.0421562 | 0.1113332 | 60.952  | 2.268 | 58.723  | 63.257  | 66.802  | 1.388  | 65.241  | 67.894  |
| 15993 | ENSG00000147905 | ZCCHC7   | -1.2 | 0.0006482 | 0.0041291 | 20.633  | 0.951 | 19.556  | 21.359  | 24.766  | 1.929  | 23.244  | 26.935  |
| 15994 | ENSG00000033030 | ZCCHC8   | 1.2  | 0.0001353 | 0.0011548 | 10.178  | 0.198 | 10.042  | 10.405  | 8.785   | 0.068  | 8.732   | 8.862   |
| 15995 | ENSG00000159714 | ZDHHC1   | -1.2 | 0.0851228 | 0.190031  | 2.589   | 0.058 | 2.535   | 2.650   | 3.234   | 0.489  | 2.866   | 3.789   |
| 15996 | ENSG00000188818 | ZDHHC11  | 1.2  | 0.0296365 | 0.0854342 | 3.039   | 0.451 | 2.576   | 3.477   | 2.552   | 0.102  | 2.435   | 2.617   |
| 15999 | ENSG00000160446 | ZDHHC12  | 1.1  | 0.0428338 | 0.1126144 | 20.247  | 0.376 | 19.907  | 20.651  | 18.304  | 1.365  | 17.158  | 19.813  |
| 16000 | ENSG00000186908 | ZDHHC17  | 1.1  | 0.0610923 | 0.1476922 | 22.879  | 0.303 | 22.636  | 23.219  | 21.800  | 0.389  | 21.487  | 22.236  |
| 16001 | ENSG00000204160 | ZDHHC18  | 1.1  | 0.0294348 | 0.0849831 | 18.575  | 1.115 | 17.356  | 19.541  | 17.232  | 0.227  | 16.970  | 17.376  |
| 16003 | ENSG00000163958 | ZDHHC19  | -1.4 | 0.0318391 | 0.0904578 | 1.544   | 0.466 | 1.275   | 2.083   | 2.242   | 0.518  | 1.853   | 2.830   |
| 16004 | ENSG00000104219 | ZDHHC2   | 1.2  | 0.0001287 | 0.001111  | 18.832  | 0.588 | 18.471  | 19.511  | 16.278  | 0.279  | 16.026  | 16.577  |
| 16005 | ENSG00000175893 | ZDHHC21  | 1.3  | 6.011E-06 | 8.655E-05 | 11.652  | 0.756 | 10.795  | 12.225  | 8.870   | 0.563  | 8.280   | 9.401   |
| 16006 | ENSG00000177108 | ZDHHC22  | -1.2 | 0.0059902 | 0.0243365 | 14.267  | 0.169 | 14.119  | 14.451  | 16.925  | 1.605  | 15.297  | 18.507  |
| 16007 | ENSG00000184307 | ZDHHC23  | 1.2  | 0.0005105 | 0.003417  | 12.146  | 0.553 | 11.583  | 12.688  | 10.416  | 0.456  | 10.139  | 10.942  |
| 16008 | ENSG00000136247 | ZDHHC4   | 1.2  | 0.0008477 | 0.0051132 | 30.522  | 1.338 | 29.678  | 32.065  | 26.850  | 0.431  | 26.426  | 27.288  |
| 16009 | ENSG00000153786 | ZDHHC7   | -1.1 | 0.0499891 | 0.1269278 | 35.569  | 1.983 | 33.292  | 36.921  | 39.466  | 3.210  | 35.844  | 41.963  |
| 16010 | ENSG00000099904 | ZDHHC8   | -1.2 | 0.0004404 | 0.0030129 | 12.620  | 1.268 | 11.156  | 13.400  | 15.931  | 1.532  | 14.768  | 17.666  |
| 16012 | ENSG00000188706 | ZDHHC9   | 1.2  | 0.0021343 | 0.0106639 | 18.642  | 0.973 | 17.533  | 19.346  | 16.535  | 0.796  | 16.011  | 17.451  |
| 16013 | ENSG00000237036 | ZEB1-AS1 | -1.3 | 0.0048225 | 0.0205853 | 5.606   | 0.263 | 5.396   | 5.900   | 7.275   | 0.300  | 7.101   | 7.621   |
| 16014 | ENSG00000160445 | ZER1     | 1.1  | 0.0239862 | 0.0726308 | 24.917  | 1.746 | 22.974  | 26.354  | 23.040  | 0.596  | 22.684  | 23.728  |
| 16015 | ENSG00000104231 | ZFAND1   | 1.1  | 0.0342305 | 0.0953913 | 29.744  | 2.599 | 27.942  | 32.724  | 27.779  | 1.125  | 27.128  | 29.077  |
| 16016 | ENSG00000178381 | ZFAND2A  | 1.6  | 2.884E-05 | 0.0003226 | 8.290   | 1.391 | 6.866   | 9.644   | 5.426   | 0.152  | 5.280   | 5.583   |
| 16017 | ENSG00000158552 | ZFAND2B  | 1.3  | 0.0028145 | 0.0133974 | 6.630   | 0.266 | 6.391   | 6.917   | 5.286   | 0.129  | 5.209   | 5.434   |
| 16018 | ENSG00000156639 | ZFAND3   | 1.2  | 8.387E-05 | 0.000782  | 42.463  | 2.285 | 40.021  | 44.549  | 37.114  | 0.827  | 36.388  | 38.015  |
| 16019 | ENSG00000107372 | ZFAND5   | -1.2 | 8.809E-06 | 0.0001197 | 89.147  | 3.799 | 85.783  | 93.267  | 105.620 | 5.215  | 99.640  | 109.225 |
| 16022 | ENSG00000086666 | ZFAND6   | -1.1 | 0.0228221 | 0.0699005 | 77.795  | 0.607 | 77.095  | 78.163  | 84.851  | 2.899  | 82.381  | 88.042  |
| 16023 | ENSG00000177410 | ZFAS1    | -1.2 | 9.649E-05 | 0.0008779 | 62.764  | 1.560 | 61.441  | 64.484  | 75.490  | 3.385  | 72.098  | 78.868  |
| 16024 | ENSG00000066827 | ZFAT     | -1.3 | 0.0020346 | 0.0102968 | 2.296   | 0.355 | 1.908   | 2.605   | 3.121   | 0.651  | 2.373   | 3.563   |
| 16025 | ENSG00000136367 | ZFHX2    | 1.2  | 0.0006066 | 0.003916  | 10.003  | 0.573 | 9.446   | 10.590  | 8.529   | 0.577  | 8.112   | 9.188   |
| 16026 | ENSG00000140836 | ZFHX3    | -1.8 | 0.0019364 | 0.0099214 | 0.200   | 0.022 | 0.177   | 0.221   | 0.367   | 0.113  | 0.257   | 0.483   |
| 16033 | ENSG00000091656 | ZFHX4    | -1.4 | 0.0005365 | 0.0035444 | 0.670   | 0.034 | 0.631   | 0.693   | 0.988   | 0.109  | 0.897   | 1.109   |
| 16034 | ENSG00000142065 | ZFP14    | -1.1 | 0.12322   | 0.2477436 | 6.988   | 0.392 | 6.662   | 7.423   | 7.735   | 0.333  | 7.483   | 8.113   |
| 16035 | ENSG00000196867 | ZFP28    | 1.1  | 0.0555138 | 0.1375685 | 4.800   | 0.207 | 4.678   | 5.039   | 4.357   | 0.278  | 4.059   | 4.610   |
| 16036 | ENSG00000128016 | ZFP36    | 1.3  | 0.0062613 | 0.0251895 | 11.716  | 1.294 | 10.651  | 13.157  | 9.429   | 0.945  | 8.422   | 10.296  |
| 16037 | ENSG00000185650 | ZFP36L1  | 1.1  | 0.0181178 | 0.058389  | 135.775 | 9.946 | 125.040 | 144.676 | 124.031 | 12.109 | 110.184 | 132.636 |
| 16038 | ENSG00000152518 | ZFP36L2  | 1.1  | 0.0600214 | 0.1456445 | 51.530  | 3.683 | 48.815  | 55.722  | 48.824  | 3.702  | 45.424  | 52.768  |

|       | A               | B        | C    | D         | E         | F       | G     | H       | I       | J       | K      | L       | M       |
|-------|-----------------|----------|------|-----------|-----------|---------|-------|---------|---------|---------|--------|---------|---------|
| 16040 | ENSG00000179059 | ZFP42    | -1.1 | 3.928E-05 | 0.0004189 | 153.416 | 3.124 | 149.813 | 155.380 | 178.669 | 5.515  | 174.594 | 184.944 |
| 16041 | ENSG00000204644 | ZFP57    | 2    | 1.136E-05 | 0.0001485 | 4.982   | 1.262 | 3.813   | 6.321   | 2.530   | 0.448  | 2.023   | 2.873   |
| 16042 | ENSG00000020256 | ZFP64    | -1.1 | 0.0364502 | 0.0998033 | 8.221   | 0.285 | 7.960   | 8.525   | 9.397   | 0.756  | 8.723   | 10.215  |
| 16043 | ENSG00000181007 | ZFP82    | 1.1  | 0.0199643 | 0.0629252 | 10.550  | 0.361 | 10.163  | 10.878  | 9.691   | 0.414  | 9.290   | 10.116  |
| 16044 | ENSG00000186660 | ZFP91    | -1.1 | 0.0006903 | 0.0043238 | 25.284  | 0.719 | 24.453  | 25.711  | 29.367  | 0.230  | 29.215  | 29.632  |
| 16048 | ENSG00000189420 | ZFP92    | 2    | 0.001909  | 0.0098105 | 0.696   | 0.040 | 0.653   | 0.732   | 0.358   | 0.093  | 0.256   | 0.437   |
| 16050 | ENSG00000162300 | ZFPL1    | -1.2 | 0.0128232 | 0.0445012 | 16.064  | 1.179 | 14.877  | 17.236  | 18.957  | 0.897  | 17.921  | 19.482  |
| 16051 | ENSG00000056097 | ZFR      | -1.2 | 2.395E-06 | 3.956E-05 | 65.773  | 1.089 | 64.692  | 66.870  | 78.487  | 2.929  | 75.180  | 80.755  |
| 16053 | ENSG00000100711 | ZFYVE21  | 1.1  | 0.0333772 | 0.09367   | 16.063  | 0.972 | 15.041  | 16.975  | 15.041  | 0.457  | 14.633  | 15.535  |
| 16054 | ENSG00000072121 | ZFYVE26  | 1.1  | 0.0077763 | 0.029966  | 8.370   | 0.406 | 8.006   | 8.808   | 7.652   | 0.634  | 6.960   | 8.205   |
| 16055 | ENSG00000155256 | ZFYVE27  | 1.1  | 0.0632201 | 0.1516869 | 14.463  | 1.114 | 13.178  | 15.157  | 13.373  | 0.743  | 12.515  | 13.821  |
| 16056 | ENSG00000157077 | ZFYVE9   | 1.2  | 2.666E-06 | 4.352E-05 | 33.350  | 2.084 | 31.872  | 35.733  | 27.767  | 1.095  | 26.870  | 28.988  |
| 16058 | ENSG00000138658 | ZGRF1    | -1.3 | 1.664E-09 | 7.766E-08 | 21.261  | 1.351 | 19.963  | 22.658  | 28.493  | 0.337  | 28.115  | 28.765  |
| 16059 | ENSG00000178764 | ZHX2     | -1.1 | 0.0048539 | 0.0206891 | 15.714  | 0.585 | 15.309  | 16.384  | 18.258  | 0.409  | 17.941  | 18.720  |
| 16060 | ENSG00000043355 | ZIC2     | -1.3 | 1.739E-10 | 1.076E-08 | 116.621 | 7.938 | 107.678 | 122.834 | 159.895 | 11.168 | 147.042 | 167.219 |
| 16061 | ENSG00000139800 | ZIC5     | -1.4 | 7.27E-11  | 4.859E-09 | 29.898  | 1.663 | 27.994  | 31.063  | 42.771  | 2.816  | 40.693  | 45.976  |
| 16062 | ENSG00000171649 | ZIK1     | -1.1 | 0.0380929 | 0.1029775 | 18.655  | 0.769 | 18.071  | 19.526  | 20.848  | 1.477  | 19.143  | 21.714  |
| 16063 | ENSG00000106261 | ZKSCAN1  | -1.3 | 1.199E-06 | 2.206E-05 | 25.348  | 1.441 | 24.068  | 26.909  | 32.693  | 2.173  | 30.707  | 35.014  |
| 16064 | ENSG00000155592 | ZKSCAN2  | -1.1 | 0.0514436 | 0.1297444 | 7.199   | 0.080 | 7.114   | 7.272   | 8.093   | 0.414  | 7.634   | 8.437   |
| 16068 | ENSG00000189298 | ZKSCAN3  | 1.1  | 0.0633273 | 0.1518988 | 6.802   | 0.123 | 6.663   | 6.896   | 6.053   | 0.400  | 5.717   | 6.495   |
| 16069 | ENSG00000196652 | ZKSCAN5  | -1.1 | 0.0762488 | 0.1746237 | 13.860  | 0.060 | 13.801  | 13.921  | 15.317  | 0.987  | 14.207  | 16.093  |
| 16070 | ENSG00000196345 | ZKSCAN7  | -1.1 | 0.085068  | 0.189961  | 7.064   | 0.361 | 6.745   | 7.456   | 8.069   | 0.128  | 7.935   | 8.190   |
| 16071 | ENSG00000198315 | ZKSCAN8  | -1.1 | 0.0952121 | 0.2061608 | 34.315  | 0.636 | 33.775  | 35.016  | 36.954  | 0.510  | 36.438  | 37.459  |
| 16072 | ENSG00000166432 | ZMAT1    | 1.1  | 0.0446438 | 0.11636   | 8.030   | 0.360 | 7.644   | 8.356   | 7.261   | 0.874  | 6.374   | 8.123   |
| 16074 | ENSG00000146007 | ZMAT2    | 1.2  | 0.000124  | 0.0010785 | 117.842 | 6.548 | 111.956 | 124.894 | 102.919 | 7.929  | 95.140  | 110.989 |
| 16075 | ENSG00000122515 | ZMIZ2    | -1.2 | 0.0001315 | 0.0011303 | 13.617  | 0.125 | 13.479  | 13.723  | 16.492  | 1.073  | 15.828  | 17.730  |
| 16076 | ENSG00000084073 | ZMPSTE24 | 1.5  | 1.743E-10 | 1.076E-08 | 45.964  | 3.131 | 43.044  | 49.270  | 32.241  | 1.711  | 30.275  | 33.390  |
| 16081 | ENSG00000197056 | ZMYM1    | -1.1 | 0.0021922 | 0.0108888 | 23.029  | 0.330 | 22.650  | 23.256  | 26.996  | 1.558  | 25.701  | 28.725  |
| 16083 | ENSG00000121741 | ZMYM2    | -1.2 | 1.855E-06 | 3.186E-05 | 66.273  | 0.972 | 65.346  | 67.285  | 77.958  | 2.546  | 75.688  | 80.711  |
| 16085 | ENSG00000147130 | ZMYM3    | -1.2 | 2.114E-06 | 3.558E-05 | 55.974  | 1.122 | 54.950  | 57.173  | 67.338  | 2.416  | 64.694  | 69.431  |
| 16087 | ENSG00000015171 | ZMYND11  | 1.3  | 1.115E-06 | 2.091E-05 | 30.386  | 0.922 | 29.853  | 31.451  | 24.548  | 2.413  | 21.837  | 26.460  |
| 16089 | ENSG00000165724 | ZMYND19  | -1.3 | 3.794E-07 | 8.532E-06 | 30.884  | 1.812 | 29.018  | 32.637  | 42.538  | 3.446  | 38.563  | 44.677  |
| 16090 | ENSG00000101040 | ZMYND8   | -1.1 | 0.0087257 | 0.0326571 | 72.193  | 3.506 | 68.159  | 74.502  | 79.890  | 1.904  | 77.697  | 81.122  |
| 16092 | ENSG00000181896 | ZNF101   | -1.2 | 0.000128  | 0.0011069 | 10.992  | 0.340 | 10.664  | 11.343  | 13.700  | 1.439  | 12.074  | 14.805  |
| 16093 | ENSG00000178150 | ZNF114   | 1.1  | 0.1060485 | 0.2223378 | 15.104  | 2.812 | 12.843  | 18.252  | 13.732  | 1.720  | 11.934  | 15.362  |
| 16096 | ENSG00000164631 | ZNF12    | -1.1 | 0.0782732 | 0.1784384 | 26.984  | 1.302 | 25.660  | 28.263  | 29.407  | 0.535  | 29.084  | 30.025  |
| 16097 | ENSG00000197961 | ZNF121   | -1.3 | 0.0002514 | 0.0019184 | 72.237  | 3.449 | 68.314  | 74.797  | 96.227  | 11.566 | 83.143  | 105.090 |
| 16098 | ENSG00000196418 | ZNF124   | 1.2  | 0.0201671 | 0.0634906 | 5.006   | 0.137 | 4.922   | 5.164   | 4.205   | 0.491  | 3.695   | 4.674   |
| 16100 | ENSG00000172262 | ZNF131   | 1.1  | 0.0338895 | 0.094661  | 13.870  | 0.979 | 13.098  | 14.971  | 12.954  | 0.666  | 12.470  | 13.714  |
| 16101 | ENSG00000125846 | ZNF133   | 1.1  | 0.016542  | 0.054484  | 14.029  | 0.865 | 13.129  | 14.855  | 12.737  | 0.074  | 12.654  | 12.794  |
| 16102 | ENSG00000213762 | ZNF134   | -1.1 | 0.1189246 | 0.2412296 | 38.043  | 0.653 | 37.609  | 38.793  | 40.876  | 1.362  | 39.334  | 41.915  |
| 16104 | ENSG00000176293 | ZNF135   | 1.2  | 0.0116495 | 0.0412537 | 5.437   | 0.593 | 4.915   | 6.082   | 4.666   | 0.238  | 4.394   | 4.839   |

|       | A               | B          | C    | D         | E         | F       | G     | H       | I       | J       | K     | L       | M       |
|-------|-----------------|------------|------|-----------|-----------|---------|-------|---------|---------|---------|-------|---------|---------|
| 16105 | ENSG00000123870 | ZNF137P    | 1.2  | 0.0453252 | 0.1178456 | 7.505   | 0.830 | 6.645   | 8.301   | 6.209   | 1.335 | 4.822   | 7.485   |
| 16108 | ENSG00000197008 | ZNF138     | -1.2 | 0.0001155 | 0.0010159 | 31.792  | 0.760 | 30.999  | 32.515  | 39.743  | 2.446 | 37.042  | 41.810  |
| 16109 | ENSG00000131127 | ZNF141     | -1.2 | 3.856E-05 | 0.0004128 | 16.391  | 0.853 | 15.407  | 16.929  | 20.313  | 0.972 | 19.467  | 21.374  |
| 16113 | ENSG00000167635 | ZNF146     | -1.1 | 0.0020613 | 0.0103912 | 139.089 | 1.656 | 137.378 | 140.684 | 155.211 | 5.059 | 151.953 | 161.039 |
| 16114 | ENSG00000179909 | ZNF154     | -1.2 | 0.0022874 | 0.0112888 | 11.745  | 0.327 | 11.371  | 11.973  | 14.118  | 1.149 | 13.359  | 15.440  |
| 16115 | ENSG00000204920 | ZNF155     | 1.3  | 0.0088166 | 0.0329244 | 4.467   | 0.150 | 4.296   | 4.577   | 3.467   | 0.865 | 2.827   | 4.451   |
| 16117 | ENSG00000147117 | ZNF157     | -1.4 | 0.0865079 | 0.1924264 | 1.405   | 0.414 | 1.028   | 1.848   | 1.972   | 0.133 | 1.822   | 2.077   |
| 16120 | ENSG00000170949 | ZNF160     | -1.3 | 1.987E-07 | 4.934E-06 | 15.660  | 0.551 | 15.299  | 16.294  | 20.112  | 1.095 | 19.360  | 21.368  |
| 16121 | ENSG00000197279 | ZNF165     | 1.1  | 0.083926  | 0.1883296 | 15.439  | 1.448 | 14.425  | 17.098  | 13.946  | 2.260 | 11.719  | 16.237  |
| 16123 | ENSG00000147394 | ZNF185     | 1.2  | 0.0011214 | 0.0064579 | 20.256  | 0.643 | 19.514  | 20.651  | 17.674  | 0.469 | 17.237  | 18.170  |
| 16124 | ENSG00000275111 | ZNF2       | -1.2 | 0.081066  | 0.1832001 | 1.916   | 0.117 | 1.847   | 2.051   | 2.439   | 0.289 | 2.138   | 2.715   |
| 16125 | ENSG00000204789 | ZNF204P    | -1.1 | 0.1010996 | 0.2146765 | 39.647  | 4.359 | 35.995  | 44.472  | 43.903  | 1.008 | 42.890  | 44.907  |
| 16127 | ENSG00000010244 | ZNF207     | -1.1 | 0.0009363 | 0.0055427 | 45.405  | 0.786 | 44.818  | 46.298  | 50.855  | 0.974 | 49.923  | 51.866  |
| 16129 | ENSG00000263072 | ZNF213-AS1 | -1.2 | 0.1169589 | 0.2385009 | 3.925   | 0.317 | 3.561   | 4.132   | 4.614   | 0.983 | 3.600   | 5.563   |
| 16130 | ENSG00000149054 | ZNF215     | 1.3  | 7.063E-06 | 9.897E-05 | 9.850   | 0.127 | 9.736   | 9.988   | 7.727   | 0.503 | 7.211   | 8.216   |
| 16131 | ENSG00000171940 | ZNF217     | -1.2 | 1.843E-07 | 4.66E-06  | 64.714  | 1.120 | 63.587  | 65.827  | 79.643  | 2.794 | 77.655  | 82.838  |
| 16132 | ENSG00000165804 | ZNF219     | -1.2 | 0.000188  | 0.0015188 | 37.353  | 1.313 | 36.011  | 38.635  | 47.621  | 5.460 | 41.853  | 52.711  |
| 16133 | ENSG00000165512 | ZNF22      | -1.1 | 0.0928763 | 0.2025032 | 81.268  | 0.780 | 80.596  | 82.123  | 87.702  | 0.632 | 87.055  | 88.317  |
| 16134 | ENSG00000159905 | ZNF221     | 2.2  | 8.191E-06 | 0.0001124 | 2.425   | 0.440 | 2.001   | 2.880   | 1.105   | 0.284 | 0.806   | 1.372   |
| 16135 | ENSG00000256294 | ZNF225     | 1.2  | 0.0151558 | 0.050839  | 3.095   | 0.432 | 2.740   | 3.576   | 2.581   | 0.028 | 2.554   | 2.610   |
| 16136 | ENSG00000167380 | ZNF226     | -1.1 | 0.1052609 | 0.2211524 | 8.366   | 0.235 | 8.114   | 8.580   | 9.252   | 0.187 | 9.138   | 9.468   |
| 16137 | ENSG00000131115 | ZNF227     | -1.1 | 0.0533339 | 0.133457  | 9.361   | 0.141 | 9.262   | 9.523   | 10.606  | 0.732 | 10.107  | 11.447  |
| 16138 | ENSG00000278318 | ZNF229     | 1.3  | 0.0036727 | 0.0165775 | 3.846   | 0.358 | 3.437   | 4.103   | 3.017   | 0.196 | 2.898   | 3.244   |
| 16139 | ENSG00000167377 | ZNF23      | -1.3 | 0.0811969 | 0.1834223 | 0.785   | 0.210 | 0.572   | 0.993   | 1.043   | 0.185 | 0.837   | 1.193   |
| 16140 | ENSG00000130856 | ZNF236     | -1.2 | 0.0011085 | 0.0063991 | 9.557   | 0.602 | 9.080   | 10.234  | 11.621  | 1.019 | 10.975  | 12.796  |
| 16141 | ENSG00000196793 | ZNF239     | 1.4  | 0.0021223 | 0.0106196 | 5.788   | 0.799 | 5.300   | 6.710   | 4.312   | 0.501 | 3.989   | 4.890   |
| 16142 | ENSG00000172466 | ZNF24      | -1.1 | 0.0731659 | 0.1694911 | 54.129  | 0.975 | 53.016  | 54.834  | 58.310  | 2.728 | 55.879  | 61.261  |
| 16143 | ENSG00000196922 | ZNF252P    | 1.4  | 1.103E-05 | 0.000145  | 5.062   | 0.141 | 4.935   | 5.213   | 3.793   | 0.398 | 3.488   | 4.244   |
| 16144 | ENSG00000083844 | ZNF264     | -1.1 | 0.0230387 | 0.0704283 | 4.271   | 0.185 | 4.100   | 4.468   | 4.884   | 0.068 | 4.808   | 4.941   |
| 16145 | ENSG00000185947 | ZNF267     | 1.2  | 7.948E-05 | 0.0007497 | 13.023  | 0.181 | 12.821  | 13.172  | 10.770  | 0.528 | 10.335  | 11.358  |
| 16146 | ENSG00000090612 | ZNF268     | 1.3  | 8.466E-06 | 0.0001156 | 7.849   | 0.468 | 7.494   | 8.380   | 6.381   | 0.199 | 6.263   | 6.611   |
| 16147 | ENSG00000063587 | ZNF275     | 1.3  | 4.99E-06  | 7.423E-05 | 11.591  | 0.665 | 10.965  | 12.289  | 9.404   | 0.380 | 9.043   | 9.800   |
| 16148 | ENSG00000158805 | ZNF276     | -1.3 | 0.0025418 | 0.0123345 | 2.831   | 0.189 | 2.628   | 3.002   | 3.724   | 0.513 | 3.304   | 4.296   |
| 16149 | ENSG00000198839 | ZNF277     | -1.2 | 0.0032033 | 0.0148512 | 16.397  | 0.210 | 16.158  | 16.554  | 19.610  | 1.476 | 18.508  | 21.287  |
| 16150 | ENSG00000275004 | ZNF280B    | 1.1  | 0.1146978 | 0.235052  | 5.798   | 0.103 | 5.705   | 5.909   | 5.373   | 0.048 | 5.336   | 5.427   |
| 16152 | ENSG00000056277 | ZNF280C    | -1.1 | 0.022718  | 0.0696698 | 12.379  | 0.875 | 11.764  | 13.382  | 14.414  | 1.277 | 13.037  | 15.558  |
| 16153 | ENSG00000187607 | ZNF286A    | -1.1 | 0.1109911 | 0.2299354 | 10.342  | 0.561 | 9.949   | 10.985  | 11.357  | 0.489 | 11.070  | 11.922  |
| 16155 | ENSG00000166526 | ZNF3       | -1.1 | 0.0119081 | 0.0419587 | 20.972  | 0.907 | 20.265  | 21.994  | 23.745  | 1.062 | 23.039  | 24.967  |
| 16156 | ENSG00000168661 | ZNF30      | -1.2 | 0.0848182 | 0.1896113 | 5.773   | 0.354 | 5.428   | 6.136   | 6.820   | 0.320 | 6.552   | 7.174   |
| 16157 | ENSG00000145908 | ZNF300     | 1.1  | 0.0606777 | 0.1469418 | 33.768  | 2.680 | 31.006  | 36.357  | 31.684  | 1.146 | 30.986  | 33.007  |
| 16158 | ENSG00000089335 | ZNF302     | 1.1  | 0.0903968 | 0.1989693 | 24.659  | 0.807 | 24.045  | 25.573  | 23.485  | 1.298 | 22.114  | 24.694  |
| 16159 | ENSG00000205903 | ZNF316     | 1.2  | 0.0046671 | 0.0200647 | 8.678   | 1.256 | 7.317   | 9.794   | 7.225   | 1.065 | 6.387   | 8.424   |



|       | A               | B          | C    | D         | E         | F      | G     | H      | I      | J      | K     | L      | M      |
|-------|-----------------|------------|------|-----------|-----------|--------|-------|--------|--------|--------|-------|--------|--------|
| 16160 | ENSG00000130803 | ZNF317     | -1.1 | 0.0753102 | 0.1729426 | 19.196 | 1.200 | 17.811 | 19.914 | 21.143 | 0.618 | 20.574 | 21.800 |
| 16161 | ENSG00000171467 | ZNF318     | -1.1 | 0.092868  | 0.2025032 | 15.290 | 0.504 | 14.781 | 15.788 | 16.620 | 0.691 | 15.824 | 17.065 |
| 16162 | ENSG00000182986 | ZNF320     | 1.1  | 0.043171  | 0.1133599 | 11.074 | 0.758 | 10.208 | 11.617 | 10.344 | 0.361 | 10.117 | 10.761 |
| 16163 | ENSG00000213801 | ZNF321P    | 1.3  | 0.0214626 | 0.0666418 | 4.054  | 0.243 | 3.818  | 4.304  | 3.122  | 0.538 | 2.509  | 3.516  |
| 16164 | ENSG00000181315 | ZNF322     | -1.1 | 0.0283546 | 0.0826404 | 29.144 | 1.528 | 27.594 | 30.649 | 32.531 | 1.904 | 30.544 | 34.341 |
| 16165 | ENSG00000083812 | ZNF324     | 1.3  | 0.0198437 | 0.0626224 | 1.749  | 0.204 | 1.560  | 1.965  | 1.339  | 0.253 | 1.051  | 1.522  |
| 16166 | ENSG00000162664 | ZNF326     | 1.1  | 0.1222966 | 0.2464437 | 17.190 | 1.762 | 15.364 | 18.881 | 15.989 | 1.204 | 14.979 | 17.321 |
| 16167 | ENSG00000130844 | ZNF331     | -1.4 | 1.939E-09 | 8.912E-08 | 14.267 | 0.191 | 14.061 | 14.440 | 20.000 | 0.723 | 19.232 | 20.667 |
| 16168 | ENSG00000160961 | ZNF333     | -1.3 | 0.0004028 | 0.0028115 | 3.346  | 0.268 | 3.143  | 3.649  | 4.394  | 0.613 | 3.852  | 5.059  |
| 16169 | ENSG00000198026 | ZNF335     | -1.3 | 0.0002775 | 0.0020802 | 3.591  | 0.551 | 3.043  | 4.145  | 4.830  | 0.410 | 4.357  | 5.081  |
| 16170 | ENSG00000130684 | ZNF337     | 1.1  | 0.0620698 | 0.1494146 | 12.489 | 0.130 | 12.397 | 12.637 | 11.516 | 0.644 | 10.800 | 12.048 |
| 16171 | ENSG00000196693 | ZNF33B     | 1.1  | 0.027414  | 0.0804394 | 18.003 | 0.356 | 17.616 | 18.316 | 16.784 | 0.885 | 15.768 | 17.386 |
| 16172 | ENSG00000131061 | ZNF341     | -1.3 | 0.0161067 | 0.0534353 | 2.497  | 0.224 | 2.247  | 2.679  | 3.240  | 0.494 | 2.817  | 3.783  |
| 16173 | ENSG00000088876 | ZNF343     | -1.3 | 0.0105056 | 0.0379417 | 2.223  | 0.121 | 2.100  | 2.342  | 2.981  | 0.242 | 2.768  | 3.244  |
| 16174 | ENSG00000113761 | ZNF346     | -1.1 | 0.0215539 | 0.0668884 | 9.310  | 0.534 | 8.759  | 9.824  | 10.898 | 0.362 | 10.480 | 11.112 |
| 16175 | ENSG00000197937 | ZNF347     | 1.1  | 0.028851  | 0.0837495 | 5.973  | 0.268 | 5.743  | 6.267  | 5.391  | 0.111 | 5.266  | 5.477  |
| 16176 | ENSG00000178338 | ZNF354B    | 1.2  | 0.0186835 | 0.0597231 | 12.846 | 0.935 | 11.839 | 13.687 | 11.387 | 0.416 | 10.906 | 11.638 |
| 16177 | ENSG00000177932 | ZNF354C    | 1.1  | 0.0744984 | 0.1716031 | 10.630 | 0.070 | 10.587 | 10.711 | 9.866  | 0.456 | 9.394  | 10.304 |
| 16178 | ENSG00000198816 | ZNF358     | -1.2 | 0.0673327 | 0.1591798 | 18.285 | 1.666 | 16.984 | 20.162 | 21.955 | 4.458 | 18.840 | 27.062 |
| 16179 | ENSG00000138311 | ZNF365     | 1.7  | 0.0075771 | 0.0293187 | 0.424  | 0.090 | 0.342  | 0.521  | 0.253  | 0.037 | 0.224  | 0.294  |
| 16180 | ENSG00000165244 | ZNF367     | 1.2  | 0.0212346 | 0.0661158 | 9.912  | 0.124 | 9.807  | 10.049 | 8.691  | 1.000 | 7.550  | 9.413  |
| 16181 | ENSG00000234420 | ZNF37BP    | 1.4  | 1.202E-06 | 2.209E-05 | 4.904  | 0.509 | 4.532  | 5.485  | 3.541  | 0.073 | 3.462  | 3.604  |
| 16182 | ENSG00000161642 | ZNF385A    | -1.3 | 0.0003548 | 0.0025308 | 12.128 | 0.977 | 11.435 | 13.245 | 15.675 | 1.444 | 14.020 | 16.678 |
| 16183 | ENSG00000186918 | ZNF395     | -1.1 | 0.0456444 | 0.1184932 | 10.295 | 0.708 | 9.870  | 11.112 | 11.666 | 1.224 | 10.382 | 12.820 |
| 16184 | ENSG00000186812 | ZNF397     | -1.1 | 0.0014758 | 0.0079845 | 39.785 | 1.050 | 38.700 | 40.796 | 45.263 | 1.088 | 44.154 | 46.330 |
| 16185 | ENSG00000197024 | ZNF398     | 1.4  | 3.18E-12  | 3.057E-10 | 40.022 | 0.650 | 39.484 | 40.744 | 29.630 | 0.221 | 29.449 | 29.877 |
| 16186 | ENSG00000133250 | ZNF414     | -1.3 | 0.0016676 | 0.0088416 | 7.628  | 0.463 | 7.178  | 8.103  | 10.080 | 1.659 | 8.165  | 11.073 |
| 16187 | ENSG00000173480 | ZNF417     | -1.2 | 0.0025462 | 0.0123426 | 11.709 | 0.075 | 11.642 | 11.790 | 14.197 | 0.767 | 13.317 | 14.728 |
| 16188 | ENSG00000197050 | ZNF420     | -1.1 | 0.0702885 | 0.1643792 | 6.971  | 0.161 | 6.831  | 7.147  | 8.058  | 0.855 | 7.103  | 8.753  |
| 16189 | ENSG00000204947 | ZNF425     | 1.3  | 0.000689  | 0.0043195 | 8.678  | 0.386 | 8.255  | 9.011  | 6.733  | 0.662 | 6.320  | 7.498  |
| 16190 | ENSG00000130818 | ZNF426     | -1.1 | 0.0244412 | 0.0736663 | 10.941 | 0.239 | 10.683 | 11.154 | 12.421 | 0.259 | 12.188 | 12.700 |
| 16191 | ENSG00000198521 | ZNF43      | -1.1 | 0.0048157 | 0.0205742 | 22.080 | 1.766 | 20.697 | 24.070 | 25.752 | 1.000 | 24.673 | 26.649 |
| 16192 | ENSG00000118620 | ZNF430     | 1.2  | 0.0106146 | 0.0382457 | 5.853  | 0.092 | 5.752  | 5.932  | 5.060  | 0.703 | 4.447  | 5.827  |
| 16193 | ENSG00000197647 | ZNF433     | 1.2  | 0.1134389 | 0.233256  | 2.742  | 0.224 | 2.494  | 2.927  | 2.305  | 0.424 | 1.930  | 2.764  |
| 16194 | ENSG00000125945 | ZNF436     | -1.4 | 0.0126535 | 0.0440074 | 1.114  | 0.208 | 0.908  | 1.323  | 1.647  | 0.417 | 1.202  | 2.030  |
| 16195 | ENSG00000249087 | ZNF436-AS1 | -1.3 | 0.0595203 | 0.1447608 | 2.046  | 0.169 | 1.891  | 2.226  | 2.763  | 0.588 | 2.121  | 3.276  |
| 16196 | ENSG00000167685 | ZNF444     | -1.3 | 4.593E-06 | 6.893E-05 | 10.047 | 0.253 | 9.755  | 10.198 | 13.230 | 1.605 | 12.228 | 15.080 |
| 16197 | ENSG00000112200 | ZNF451     | -1.1 | 0.0002564 | 0.0019505 | 13.204 | 0.891 | 12.330 | 14.110 | 15.489 | 0.442 | 15.013 | 15.888 |
| 16199 | ENSG00000148143 | ZNF462     | -1.1 | 0.0139164 | 0.0475491 | 13.851 | 0.666 | 13.128 | 14.438 | 15.529 | 0.882 | 14.512 | 16.075 |
| 16200 | ENSG00000225614 | ZNF469     | 1.2  | 0.1108858 | 0.2298299 | 1.193  | 0.156 | 1.045  | 1.357  | 1.033  | 0.157 | 0.853  | 1.142  |
| 16201 | ENSG00000197016 | ZNF470     | 1.4  | 1.456E-05 | 0.0001821 | 4.533  | 0.241 | 4.333  | 4.800  | 3.410  | 0.297 | 3.172  | 3.743  |
| 16202 | ENSG00000196263 | ZNF471     | 1.2  | 0.0943523 | 0.2050342 | 2.394  | 0.231 | 2.153  | 2.612  | 2.078  | 0.295 | 1.747  | 2.312  |

|       | A               | B          | C    | D         | E         | F      | G     | H      | I      | J      | K     | L      | M      |
|-------|-----------------|------------|------|-----------|-----------|--------|-------|--------|--------|--------|-------|--------|--------|
| 16203 | ENSG00000180035 | ZNF48      | 1.1  | 0.1221168 | 0.2461988 | 17.368 | 0.848 | 16.444 | 18.112 | 16.330 | 2.058 | 14.308 | 18.422 |
| 16204 | ENSG00000198298 | ZNF485     | 1.3  | 0.0134032 | 0.0461686 | 6.262  | 0.186 | 6.098  | 6.464  | 4.994  | 0.593 | 4.386  | 5.572  |
| 16205 | ENSG00000243660 | ZNF487     | -1.4 | 0.0586146 | 0.1430724 | 0.605  | 0.048 | 0.564  | 0.659  | 0.863  | 0.118 | 0.786  | 0.999  |
| 16206 | ENSG00000229676 | ZNF492     | 1.3  | 0.1225688 | 0.2467865 | 1.002  | 0.126 | 0.870  | 1.120  | 0.799  | 0.209 | 0.585  | 1.003  |
| 16207 | ENSG00000162714 | ZNF496     | -1.1 | 0.0017261 | 0.009079  | 22.380 | 0.822 | 21.575 | 23.218 | 25.611 | 1.349 | 24.288 | 26.985 |
| 16208 | ENSG00000103199 | ZNF500     | -1.2 | 0.0031875 | 0.0147931 | 3.796  | 0.379 | 3.359  | 4.033  | 4.827  | 0.291 | 4.492  | 5.008  |
| 16209 | ENSG00000243943 | ZNF512     | 1.2  | 0.000181  | 0.0014744 | 30.359 | 1.206 | 29.024 | 31.369 | 25.999 | 2.012 | 24.286 | 28.214 |
| 16210 | ENSG00000144026 | ZNF514     | -1.1 | 0.1200837 | 0.2430269 | 11.935 | 0.343 | 11.721 | 12.331 | 13.051 | 0.176 | 12.848 | 13.154 |
| 16211 | ENSG00000101493 | ZNF516     | 1.4  | 3.807E-07 | 8.55E-06  | 11.599 | 1.253 | 10.152 | 12.329 | 8.675  | 0.443 | 8.165  | 8.965  |
| 16212 | ENSG00000177853 | ZNF518A    | 1.1  | 0.1191937 | 0.2416313 | 22.944 | 0.267 | 22.668 | 23.201 | 22.310 | 0.366 | 21.888 | 22.546 |
| 16213 | ENSG00000178163 | ZNF518B    | -1.1 | 0.0509064 | 0.1287594 | 7.434  | 0.105 | 7.364  | 7.555  | 8.386  | 0.454 | 7.904  | 8.806  |
| 16214 | ENSG00000203326 | ZNF525     | 1.2  | 5.007E-05 | 0.0005138 | 19.420 | 0.260 | 19.227 | 19.716 | 16.559 | 0.404 | 16.226 | 17.009 |
| 16215 | ENSG00000167625 | ZNF526     | -1.2 | 0.0032328 | 0.0149634 | 8.601  | 0.386 | 8.193  | 8.959  | 10.507 | 0.590 | 10.036 | 11.169 |
| 16216 | ENSG00000183647 | ZNF530     | -1.2 | 0.0337363 | 0.0943498 | 4.645  | 0.313 | 4.324  | 4.950  | 5.607  | 0.488 | 5.044  | 5.902  |
| 16217 | ENSG00000074657 | ZNF532     | -1   | 0.0879285 | 0.1946002 | 60.334 | 3.637 | 56.150 | 62.747 | 64.664 | 1.364 | 63.854 | 66.239 |
| 16218 | ENSG00000240225 | ZNF542P    | 1.1  | 0.06735   | 0.1591798 | 20.944 | 1.477 | 20.066 | 22.650 | 19.644 | 0.419 | 19.172 | 19.975 |
| 16219 | ENSG00000178229 | ZNF543     | 1.2  | 0.0929185 | 0.2025169 | 3.657  | 0.166 | 3.472  | 3.793  | 3.134  | 0.555 | 2.547  | 3.649  |
| 16220 | ENSG00000187187 | ZNF546     | 1.4  | 0.0574419 | 0.1410445 | 0.455  | 0.033 | 0.430  | 0.492  | 0.327  | 0.101 | 0.224  | 0.426  |
| 16221 | ENSG00000121406 | ZNF549     | 1.1  | 0.1151824 | 0.2357541 | 5.083  | 0.451 | 4.622  | 5.523  | 4.715  | 0.384 | 4.388  | 5.138  |
| 16222 | ENSG00000204519 | ZNF551     | -1.1 | 0.0367655 | 0.1004549 | 21.536 | 0.161 | 21.356 | 21.665 | 24.062 | 0.515 | 23.638 | 24.636 |
| 16223 | ENSG00000186300 | ZNF555     | -1.2 | 0.0085223 | 0.0320449 | 2.992  | 0.111 | 2.864  | 3.061  | 3.696  | 0.280 | 3.449  | 4.000  |
| 16224 | ENSG00000167785 | ZNF558     | -1.1 | 0.0284491 | 0.0828443 | 4.051  | 0.268 | 3.770  | 4.305  | 4.746  | 0.129 | 4.649  | 4.892  |
| 16225 | ENSG00000267106 | ZNF561-AS1 | 1.2  | 0.0108617 | 0.03897   | 4.610  | 0.214 | 4.373  | 4.788  | 3.832  | 0.118 | 3.700  | 3.928  |
| 16226 | ENSG00000171466 | ZNF562     | 1.1  | 0.0586332 | 0.1430972 | 12.191 | 0.555 | 11.570 | 12.637 | 11.611 | 0.270 | 11.335 | 11.875 |
| 16227 | ENSG00000186017 | ZNF566     | 1.1  | 0.1022453 | 0.2165111 | 6.056  | 0.211 | 5.885  | 6.292  | 5.573  | 0.349 | 5.202  | 5.895  |
| 16228 | ENSG00000189042 | ZNF567     | -1.2 | 0.0013349 | 0.0073828 | 10.180 | 0.926 | 9.195  | 11.033 | 12.501 | 0.531 | 12.117 | 13.106 |
| 16229 | ENSG00000198453 | ZNF568     | 1.1  | 0.0712679 | 0.1660495 | 2.616  | 0.076 | 2.550  | 2.700  | 2.328  | 0.270 | 2.121  | 2.633  |
| 16230 | ENSG00000171970 | ZNF57      | 1.2  | 0.0219528 | 0.067815  | 7.627  | 0.155 | 7.480  | 7.788  | 6.384  | 0.556 | 5.940  | 7.007  |
| 16231 | ENSG00000267470 | ZNF571-AS1 | -1.6 | 0.0039595 | 0.0176376 | 0.692  | 0.150 | 0.523  | 0.809  | 1.167  | 0.209 | 0.926  | 1.294  |
| 16232 | ENSG00000180938 | ZNF572     | 1.3  | 0.0104856 | 0.0378938 | 8.371  | 1.299 | 7.619  | 9.872  | 6.717  | 1.001 | 6.113  | 7.872  |
| 16233 | ENSG00000124444 | ZNF576     | -1.2 | 0.0324764 | 0.0917902 | 3.375  | 0.386 | 3.124  | 3.820  | 4.213  | 0.178 | 4.015  | 4.358  |
| 16234 | ENSG00000161551 | ZNF577     | 1.1  | 0.0319228 | 0.0906345 | 9.778  | 0.507 | 9.344  | 10.336 | 8.936  | 0.302 | 8.747  | 9.285  |
| 16235 | ENSG00000213015 | ZNF580     | -1.2 | 0.0330507 | 0.092975  | 8.253  | 0.505 | 7.953  | 8.836  | 10.028 | 1.541 | 8.480  | 11.561 |
| 16236 | ENSG00000171425 | ZNF581     | -1.4 | 1.603E-06 | 2.807E-05 | 36.262 | 1.501 | 34.785 | 37.786 | 50.936 | 5.096 | 46.048 | 56.217 |
| 16237 | ENSG00000018869 | ZNF582     | 1.3  | 0.0148672 | 0.0500895 | 4.421  | 0.113 | 4.314  | 4.540  | 3.517  | 0.527 | 3.035  | 4.080  |
| 16238 | ENSG00000267454 | ZNF582-AS1 | 1.3  | 0.0186815 | 0.0597231 | 5.187  | 0.400 | 4.784  | 5.585  | 4.054  | 0.496 | 3.609  | 4.588  |
| 16239 | ENSG00000083828 | ZNF586     | -1.3 | 0.0005043 | 0.0033833 | 6.890  | 0.281 | 6.610  | 7.173  | 9.292  | 0.672 | 8.609  | 9.953  |
| 16240 | ENSG00000198466 | ZNF587     | -1.2 | 0.0001799 | 0.001468  | 18.898 | 0.536 | 18.310 | 19.358 | 22.651 | 1.810 | 20.569 | 23.850 |
| 16241 | ENSG00000269343 | ZNF587B    | -1.2 | 0.0001036 | 0.0009289 | 17.212 | 0.775 | 16.320 | 17.720 | 21.317 | 1.112 | 20.042 | 22.085 |
| 16243 | ENSG00000164048 | ZNF589     | -1.1 | 0.0002108 | 0.0016617 | 66.383 | 3.790 | 62.149 | 69.460 | 77.311 | 1.560 | 75.579 | 78.607 |

|       | A               | B      | C    | D         | E         | F      | G     | H      | I      | J      | K     | L      | M      |
|-------|-----------------|--------|------|-----------|-----------|--------|-------|--------|--------|--------|-------|--------|--------|
| 16244 | ENSG00000166716 | ZNF592 | -1.1 | 0.0023903 | 0.0117171 | 15.357 | 0.863 | 14.630 | 16.311 | 17.802 | 0.690 | 17.019 | 18.324 |
| 16245 | ENSG00000180626 | ZNF594 | 1.2  | 0.0042223 | 0.0185339 | 10.898 | 0.527 | 10.537 | 11.503 | 9.486  | 0.802 | 8.574  | 10.082 |
| 16246 | ENSG00000272602 | ZNF595 | -1.1 | 0.0231163 | 0.0705586 | 12.590 | 0.644 | 12.065 | 13.308 | 14.619 | 0.665 | 14.097 | 15.368 |
| 16248 | ENSG00000167962 | ZNF598 | -1.1 | 0.0973802 | 0.2092774 | 14.756 | 0.845 | 14.166 | 15.725 | 16.408 | 0.865 | 15.411 | 16.951 |
| 16250 | ENSG00000168916 | ZNF608 | -1.1 | 0.0033145 | 0.0152581 | 22.532 | 0.256 | 22.341 | 22.823 | 25.592 | 1.227 | 24.206 | 26.541 |
| 16251 | ENSG00000180357 | ZNF609 | -1.2 | 4.298E-06 | 6.52E-05  | 23.687 | 1.701 | 21.722 | 24.688 | 28.827 | 0.888 | 27.833 | 29.542 |
| 16252 | ENSG00000167554 | ZNF610 | 1.2  | 0.0274708 | 0.0805361 | 6.879  | 0.881 | 5.954  | 7.708  | 5.862  | 0.455 | 5.518  | 6.377  |
| 16253 | ENSG00000213020 | ZNF611 | 1.2  | 0.0321736 | 0.0911629 | 3.594  | 0.139 | 3.446  | 3.720  | 3.124  | 0.233 | 2.855  | 3.265  |
| 16254 | ENSG00000197619 | ZNF615 | 1.2  | 0.0160252 | 0.0532485 | 9.688  | 0.341 | 9.330  | 10.007 | 8.595  | 0.759 | 7.919  | 9.417  |
| 16255 | ENSG00000173545 | ZNF622 | -1.1 | 0.0232308 | 0.0708826 | 33.916 | 0.983 | 32.935 | 34.901 | 38.884 | 2.980 | 35.648 | 41.516 |
| 16256 | ENSG00000197566 | ZNF624 | -1.3 | 0.0415996 | 0.1101572 | 1.668  | 0.015 | 1.653  | 1.683  | 2.144  | 0.226 | 1.902  | 2.349  |
| 16257 | ENSG00000102870 | ZNF629 | -1.1 | 0.008059  | 0.0307808 | 15.576 | 0.896 | 14.553 | 16.228 | 17.873 | 0.307 | 17.519 | 18.063 |
| 16258 | ENSG00000121864 | ZNF639 | -1.1 | 0.1119312 | 0.2312327 | 11.272 | 0.585 | 10.926 | 11.947 | 12.439 | 0.635 | 11.977 | 13.163 |
| 16259 | ENSG00000167395 | ZNF646 | -1.1 | 0.0048476 | 0.0206726 | 8.996  | 0.596 | 8.327  | 9.472  | 10.493 | 0.328 | 10.253 | 10.867 |
| 16260 | ENSG00000198093 | ZNF649 | 1.1  | 0.109285  | 0.2273757 | 86.131 | 5.656 | 79.866 | 90.861 | 83.552 | 3.585 | 79.500 | 86.311 |
| 16261 | ENSG00000198740 | ZNF652 | -1.1 | 0.0080393 | 0.0307136 | 13.802 | 0.712 | 13.360 | 14.623 | 15.769 | 0.770 | 15.230 | 16.651 |
| 16262 | ENSG00000161914 | ZNF653 | -1.4 | 0.0361513 | 0.0992231 | 1.003  | 0.187 | 0.895  | 1.219  | 1.460  | 0.371 | 1.184  | 1.882  |
| 16263 | ENSG00000197343 | ZNF655 | -1.1 | 0.0265094 | 0.0783286 | 19.892 | 0.750 | 19.082 | 20.562 | 22.172 | 0.736 | 21.534 | 22.978 |
| 16264 | ENSG00000179195 | ZNF664 | 1.2  | 4.284E-07 | 9.484E-06 | 64.863 | 2.363 | 63.057 | 67.537 | 55.606 | 1.210 | 54.740 | 56.989 |
| 16265 | ENSG00000198046 | ZNF667 | -1.1 | 0.1105508 | 0.2292713 | 10.820 | 0.540 | 10.214 | 11.252 | 11.830 | 0.677 | 11.053 | 12.294 |
| 16266 | ENSG00000188295 | ZNF669 | -1.2 | 0.0051573 | 0.0216279 | 13.077 | 0.880 | 12.566 | 14.093 | 16.238 | 0.587 | 15.561 | 16.604 |
| 16267 | ENSG00000277462 | ZNF670 | -1.1 | 0.0500639 | 0.1270604 | 20.064 | 2.354 | 18.215 | 22.714 | 23.032 | 0.629 | 22.430 | 23.686 |
| 16269 | ENSG00000171161 | ZNF672 | 1.1  | 0.0218193 | 0.0675038 | 21.803 | 0.278 | 21.484 | 21.983 | 19.969 | 1.480 | 18.390 | 21.324 |
| 16270 | ENSG00000251192 | ZNF674 | 1.2  | 0.0320498 | 0.090934  | 3.216  | 0.214 | 3.025  | 3.447  | 2.774  | 0.190 | 2.559  | 2.917  |
| 16271 | ENSG00000196109 | ZNF676 | -1.3 | 1.395E-06 | 2.511E-05 | 34.046 | 0.313 | 33.856 | 34.407 | 44.185 | 1.610 | 42.651 | 45.862 |
| 16272 | ENSG00000181450 | ZNF678 | -1.1 | 0.049624  | 0.1263097 | 20.410 | 0.914 | 19.356 | 20.990 | 22.543 | 0.483 | 22.059 | 23.025 |
| 16273 | ENSG00000197124 | ZNF682 | 1.2  | 0.0080315 | 0.0306975 | 12.235 | 1.231 | 10.856 | 13.225 | 10.533 | 0.651 | 10.145 | 11.285 |
| 16274 | ENSG00000143373 | ZNF687 | -1.1 | 0.1185709 | 0.240801  | 22.697 | 1.442 | 21.534 | 24.311 | 24.727 | 2.535 | 21.843 | 26.604 |
| 16275 | ENSG00000198429 | ZNF69  | 1.3  | 0.0058829 | 0.0240334 | 8.597  | 1.167 | 7.599  | 9.880  | 6.885  | 1.122 | 5.603  | 7.687  |
| 16276 | ENSG00000171163 | ZNF692 | -1.4 | 1.399E-06 | 2.515E-05 | 13.183 | 1.212 | 11.807 | 14.092 | 18.634 | 2.168 | 16.878 | 21.058 |
| 16277 | ENSG00000197472 | ZNF695 | -1.1 | 0.1088043 | 0.2266823 | 6.494  | 0.946 | 5.543  | 7.434  | 7.510  | 0.081 | 7.420  | 7.578  |
| 16278 | ENSG00000143067 | ZNF697 | 1.6  | 2.44E-11  | 1.861E-09 | 19.593 | 2.466 | 16.753 | 21.189 | 12.359 | 0.592 | 11.676 | 12.713 |
| 16279 | ENSG00000147789 | ZNF7   | -1.2 | 0.0001799 | 0.001468  | 5.448  | 0.101 | 5.334  | 5.528  | 6.780  | 0.302 | 6.441  | 7.018  |
| 16280 | ENSG00000120963 | ZNF706 | 1.2  | 0.0001339 | 0.0011475 | 19.638 | 0.862 | 18.723 | 20.433 | 17.014 | 1.130 | 15.782 | 18.002 |
| 16281 | ENSG00000182141 | ZNF708 | 1.2  | 0.0068401 | 0.0269666 | 19.640 | 1.713 | 17.983 | 21.404 | 17.373 | 0.904 | 16.381 | 18.151 |
| 16282 | ENSG00000197951 | ZNF71  | 1.1  | 0.0377336 | 0.1022956 | 7.120  | 0.471 | 6.592  | 7.495  | 6.407  | 0.774 | 5.653  | 7.199  |
| 16283 | ENSG00000160352 | ZNF714 | -1.1 | 0.0915126 | 0.200759  | 26.124 | 0.849 | 25.156 | 26.743 | 28.319 | 0.961 | 27.378 | 29.300 |
| 16284 | ENSG00000197302 | ZNF720 | -1.1 | 0.1013641 | 0.2151571 | 10.258 | 0.090 | 10.169 | 10.348 | 11.341 | 1.107 | 10.355 | 12.539 |
| 16285 | ENSG00000213967 | ZNF726 | 1.1  | 0.1023208 | 0.2166376 | 6.159  | 0.211 | 5.932  | 6.349  | 5.690  | 0.576 | 5.247  | 6.342  |
| 16286 | ENSG00000234444 | ZNF736 | 1.3  | 5.759E-05 | 0.0005756 | 3.363  | 0.082 | 3.268  | 3.413  | 2.562  | 0.110 | 2.443  | 2.661  |
| 16287 | ENSG00000172687 | ZNF738 | 1.3  | 2.397E-08 | 7.95E-07  | 74.109 | 3.168 | 71.421 | 77.602 | 60.311 | 2.036 | 58.154 | 62.199 |
| 16288 | ENSG00000185252 | ZNF74  | -1.1 | 0.0649009 | 0.1546012 | 21.466 | 0.734 | 20.902 | 22.297 | 23.496 | 1.108 | 22.757 | 24.770 |
| 16289 | ENSG00000139651 | ZNF740 | -1.1 | 0.041588  | 0.1101438 | 13.812 | 0.788 | 12.951 | 14.499 | 15.328 | 0.647 | 14.584 | 15.756 |

|       | A               | B          | C    | D         | E         | F      | G     | H      | I      | J       | K     | L       | M       |
|-------|-----------------|------------|------|-----------|-----------|--------|-------|--------|--------|---------|-------|---------|---------|
| 16290 | ENSG00000181220 | ZNF746     | -1.1 | 0.0886864 | 0.195985  | 5.165  | 0.661 | 4.480  | 5.799  | 5.897   | 0.314 | 5.612   | 6.233   |
| 16291 | ENSG00000169951 | ZNF764     | -1.2 | 0.121724  | 0.2455238 | 3.396  | 0.495 | 2.942  | 3.924  | 4.066   | 0.552 | 3.538   | 4.640   |
| 16293 | ENSG00000175691 | ZNF77      | -1.3 | 0.0295703 | 0.0853015 | 4.759  | 0.650 | 4.096  | 5.396  | 6.101   | 0.778 | 5.519   | 6.985   |
| 16295 | ENSG00000198146 | ZNF770     | -1.2 | 8.461E-08 | 2.354E-06 | 91.770 | 5.350 | 86.874 | 97.480 | 114.207 | 0.905 | 113.453 | 115.211 |
| 16296 | ENSG00000197782 | ZNF780A    | 1.2  | 0.0002578 | 0.0019577 | 6.577  | 0.328 | 6.236  | 6.890  | 5.407   | 0.281 | 5.114   | 5.673   |
| 16298 | ENSG00000128000 | ZNF780B    | 1.2  | 0.0136741 | 0.0468727 | 5.265  | 0.674 | 4.542  | 5.877  | 4.599   | 0.216 | 4.385   | 4.816   |
| 16299 | ENSG00000204946 | ZNF783     | 1.3  | 0.0001899 | 0.0015309 | 5.800  | 0.714 | 4.983  | 6.304  | 4.467   | 0.473 | 4.179   | 5.012   |
| 16300 | ENSG00000197162 | ZNF785     | -1.1 | 0.0219208 | 0.0677783 | 9.084  | 0.396 | 8.646  | 9.417  | 10.602  | 0.571 | 10.098  | 11.222  |
| 16302 | ENSG00000197362 | ZNF786     | 1.2  | 0.0057872 | 0.0237223 | 14.173 | 1.780 | 12.638 | 16.124 | 12.059  | 0.340 | 11.822  | 12.449  |
| 16303 | ENSG00000142409 | ZNF787     | -1.2 | 0.0047382 | 0.0202982 | 19.057 | 0.313 | 18.709 | 19.318 | 22.724  | 3.075 | 20.560  | 26.244  |
| 16304 | ENSG00000214189 | ZNF788     | 1.1  | 0.0218686 | 0.067629  | 14.546 | 0.828 | 13.644 | 15.273 | 13.491  | 0.296 | 13.276  | 13.829  |
| 16305 | ENSG00000196152 | ZNF79      | -1.4 | 0.000574  | 0.0037452 | 4.697  | 0.148 | 4.530  | 4.813  | 6.775   | 0.344 | 6.380   | 6.998   |
| 16306 | ENSG00000180884 | ZNF792     | -1.2 | 0.0415041 | 0.1099903 | 2.437  | 0.042 | 2.393  | 2.477  | 3.065   | 0.425 | 2.680   | 3.521   |
| 16307 | ENSG00000188227 | ZNF793     | -1.2 | 0.0011393 | 0.0065271 | 3.236  | 0.098 | 3.139  | 3.335  | 4.062   | 0.178 | 3.958   | 4.267   |
| 16308 | ENSG00000266916 | ZNF793-AS1 | -1.3 | 0.0852349 | 0.1902068 | 3.924  | 0.207 | 3.722  | 4.135  | 5.074   | 0.416 | 4.617   | 5.432   |
| 16309 | ENSG00000278129 | ZNF8       | -1.2 | 0.0006224 | 0.0039979 | 5.920  | 0.542 | 5.295  | 6.248  | 7.381   | 0.251 | 7.112   | 7.607   |
| 16310 | ENSG00000204524 | ZNF805     | -1.2 | 0.058853  | 0.1435093 | 3.426  | 0.339 | 3.104  | 3.779  | 4.289   | 0.221 | 4.035   | 4.432   |
| 16311 | ENSG00000198346 | ZNF813     | 1.1  | 0.1135577 | 0.2333659 | 12.574 | 1.180 | 11.637 | 13.899 | 11.873  | 0.438 | 11.606  | 12.379  |
| 16312 | ENSG00000204514 | ZNF814     | -1.4 | 1.305E-08 | 4.687E-07 | 4.433  | 0.303 | 4.253  | 4.782  | 6.410   | 0.078 | 6.321   | 6.458   |
| 16313 | ENSG00000185869 | ZNF829     | 1.1  | 0.0935503 | 0.2035528 | 4.024  | 0.133 | 3.931  | 4.176  | 3.686   | 0.139 | 3.530   | 3.798   |
| 16314 | ENSG00000167766 | ZNF83      | 1.1  | 0.0238552 | 0.072353  | 12.815 | 0.098 | 12.715 | 12.911 | 11.805  | 0.419 | 11.414  | 12.248  |
| 16315 | ENSG00000198783 | ZNF830     | -1.1 | 0.0703161 | 0.1644012 | 18.600 | 1.535 | 16.829 | 19.502 | 21.163  | 1.279 | 19.915  | 22.472  |
| 16316 | ENSG00000127903 | ZNF835     | 1.5  | 0.0152715 | 0.0511661 | 1.322  | 0.296 | 1.105  | 1.659  | 0.883   | 0.142 | 0.721   | 0.984   |
| 16317 | ENSG00000198040 | ZNF84      | 1.2  | 2.085E-05 | 0.0002463 | 18.303 | 0.682 | 17.541 | 18.855 | 15.242  | 0.392 | 14.884  | 15.660  |
| 16318 | ENSG00000197608 | ZNF841     | 1.2  | 0.0043582 | 0.0190123 | 14.278 | 1.043 | 13.104 | 15.100 | 12.456  | 0.429 | 12.039  | 12.896  |
| 16319 | ENSG00000223547 | ZNF844     | 1.2  | 0.0120432 | 0.0423818 | 7.808  | 0.216 | 7.590  | 8.023  | 6.931   | 0.115 | 6.865   | 7.064   |
| 16320 | ENSG00000213799 | ZNF845     | 1.1  | 0.1121755 | 0.2316231 | 16.367 | 0.633 | 15.755 | 17.019 | 15.389  | 0.861 | 14.434  | 16.105  |
| 16321 | ENSG00000196605 | ZNF846     | 1.2  | 0.0591522 | 0.1440858 | 5.595  | 0.639 | 4.875  | 6.095  | 4.908   | 0.304 | 4.598   | 5.205   |
| 16322 | ENSG00000198153 | ZNF849P    | -1.6 | 0.0566798 | 0.1395379 | 0.922  | 0.039 | 0.896  | 0.967  | 1.478   | 0.034 | 1.439   | 1.498   |
| 16323 | ENSG00000178917 | ZNF852     | -1.2 | 0.0124182 | 0.0433497 | 5.381  | 0.630 | 4.683  | 5.907  | 6.804   | 1.084 | 5.881   | 7.999   |
| 16325 | ENSG00000236609 | ZNF853     | -1.1 | 0.0688704 | 0.161801  | 7.065  | 0.332 | 6.683  | 7.278  | 8.234   | 1.081 | 7.006   | 9.043   |
| 16326 | ENSG00000261221 | ZNF865     | -1.2 | 0.0132299 | 0.0456835 | 5.338  | 0.401 | 5.017  | 5.788  | 6.686   | 1.017 | 5.700   | 7.732   |
| 16327 | ENSG00000221923 | ZNF880     | 1.1  | 0.0543492 | 0.1353916 | 16.854 | 1.165 | 15.834 | 18.123 | 15.474  | 0.952 | 14.729  | 16.547  |
| 16328 | ENSG00000213793 | ZNF888     | 1.2  | 0.0081841 | 0.031147  | 9.929  | 0.135 | 9.779  | 10.041 | 8.716   | 0.347 | 8.358   | 9.051   |
| 16329 | ENSG00000146757 | ZNF92      | -1.1 | 0.0692819 | 0.1625419 | 31.533 | 1.610 | 29.952 | 33.170 | 36.943  | 2.583 | 34.246  | 39.393  |
| 16330 | ENSG00000184635 | ZNF93      | 1.1  | 0.0007099 | 0.0044142 | 31.643 | 0.632 | 31.066 | 32.319 | 28.277  | 1.968 | 26.777  | 30.506  |
| 16331 | ENSG00000174276 | ZNHIT2     | -1.2 | 0.0897706 | 0.1977712 | 7.407  | 0.819 | 6.616  | 8.253  | 9.105   | 0.266 | 8.817   | 9.341   |
| 16332 | ENSG00000273611 | ZNHIT3     | -1.1 | 0.0120722 | 0.0424573 | 20.678 | 1.187 | 19.739 | 22.012 | 23.483  | 1.761 | 21.611  | 25.105  |
| 16333 | ENSG00000117174 | ZNHIT6     | 1.2  | 0.0005007 | 0.0033602 | 16.716 | 0.295 | 16.402 | 16.987 | 14.611  | 0.671 | 13.906  | 15.243  |
| 16334 | ENSG00000183579 | ZNRF3      | 1.2  | 0.004018  | 0.0178316 | 12.109 | 0.658 | 11.590 | 12.849 | 10.680  | 0.900 | 10.096  | 11.716  |
| 16335 | ENSG00000188372 | ZP3        | -1.1 | 0.1079201 | 0.2254234 | 7.821  | 0.464 | 7.323  | 8.241  | 9.089   | 1.120 | 7.805   | 9.866   |
| 16336 | ENSG00000109917 | ZPR1       | 1.1  | 0.0861633 | 0.1918907 | 20.736 | 0.618 | 20.296 | 21.443 | 19.932  | 0.382 | 19.647  | 20.365  |

|       | A                | B           | C    | D         | E         | F       | G      | H       | I       | J       | K     | L       | M       |
|-------|------------------|-------------|------|-----------|-----------|---------|--------|---------|---------|---------|-------|---------|---------|
| 16337 | ENSG00000019995  | ZRANB1      | -1.1 | 0.0135876 | 0.046633  | 22.525  | 0.957  | 21.491  | 23.380  | 25.464  | 1.552 | 23.840  | 26.932  |
| 16338 | ENSG000000130182 | ZSCAN10     | -1.1 | 0.0032073 | 0.0148617 | 128.679 | 5.991  | 122.234 | 134.077 | 144.201 | 6.234 | 139.952 | 151.357 |
| 16339 | ENSG00000269293  | ZSCAN16-AS1 | -1.3 | 0.0128395 | 0.0445353 | 3.424   | 0.139  | 3.276   | 3.552   | 4.640   | 0.117 | 4.552   | 4.772   |
| 16340 | ENSG00000176371  | ZSCAN2      | 1.2  | 7.996E-05 | 0.0007525 | 18.091  | 1.185  | 17.313  | 19.455  | 15.138  | 0.940 | 14.581  | 16.223  |
| 16341 | ENSG00000121903  | ZSCAN20     | -1.3 | 0.0171876 | 0.0560284 | 2.048   | 0.370  | 1.780   | 2.470   | 2.805   | 0.252 | 2.516   | 2.976   |
| 16342 | ENSG00000166529  | ZSCAN21     | -1.2 | 0.0102137 | 0.0370933 | 17.087  | 0.800  | 16.293  | 17.892  | 20.334  | 1.103 | 19.594  | 21.602  |
| 16343 | ENSG00000186814  | ZSCAN30     | 1.2  | 0.0004288 | 0.0029532 | 14.639  | 0.656  | 13.951  | 15.257  | 12.626  | 0.380 | 12.234  | 12.993  |
| 16344 | ENSG00000131848  | ZSCAN5A     | 1.2  | 0.1022387 | 0.2165111 | 0.912   | 0.046  | 0.882   | 0.965   | 0.750   | 0.147 | 0.612   | 0.905   |
| 16345 | ENSG00000137185  | ZSCAN9      | -1.2 | 0.0065887 | 0.0262322 | 11.816  | 1.183  | 10.455  | 12.593  | 14.176  | 1.030 | 13.560  | 15.366  |
| 16346 | ENSG00000168612  | ZSWIM1      | -1.2 | 0.0132978 | 0.0458711 | 8.539   | 0.552  | 7.963   | 9.065   | 10.458  | 1.220 | 9.251   | 11.692  |
| 16348 | ENSG00000132003  | ZSWIM4      | 1.1  | 0.0172928 | 0.0562773 | 17.773  | 2.165  | 15.382  | 19.599  | 16.079  | 0.243 | 15.929  | 16.359  |
| 16349 | ENSG00000214941  | ZSWIM7      | 1.2  | 0.0021692 | 0.0107966 | 22.727  | 2.675  | 20.367  | 25.634  | 19.444  | 0.275 | 19.173  | 19.723  |
| 16350 | ENSG00000153975  | ZUFSP       | -1.1 | 0.0114052 | 0.0404817 | 22.347  | 1.578  | 20.526  | 23.292  | 26.245  | 1.056 | 25.321  | 27.396  |
| 16351 | ENSG00000086827  | ZW10        | -1.1 | 0.0375743 | 0.1019781 | 33.232  | 1.348  | 32.442  | 34.789  | 36.945  | 1.526 | 35.555  | 38.577  |
| 16352 | ENSG00000174442  | ZWILCH      | 1.1  | 0.000986  | 0.0058001 | 54.877  | 3.294  | 52.801  | 58.674  | 49.967  | 2.278 | 47.336  | 51.284  |
| 16353 | ENSG00000122952  | ZWINT       | 1.1  | 0.0243181 | 0.0734188 | 77.014  | 2.346  | 74.491  | 79.129  | 72.889  | 1.037 | 71.934  | 73.993  |
| 16354 | ENSG00000198205  | ZXDA        | -1.5 | 0.0004599 | 0.0031277 | 2.389   | 0.126  | 2.245   | 2.481   | 3.557   | 0.131 | 3.474   | 3.707   |
| 16355 | ENSG00000198455  | ZXDB        | -1.1 | 0.072994  | 0.1692088 | 8.846   | 0.273  | 8.535   | 9.043   | 9.935   | 0.330 | 9.619   | 10.278  |
| 16357 | ENSG00000070476  | ZXDC        | -1.1 | 0.055464  | 0.1374942 | 8.737   | 0.403  | 8.449   | 9.197   | 9.825   | 0.994 | 9.182   | 10.969  |
| 16358 | ENSG00000159840  | ZYX         | 1.2  | 0.000659  | 0.0041807 | 105.907 | 7.481  | 97.271  | 110.402 | 86.948  | 9.667 | 80.903  | 98.097  |
| 16360 | ENSG00000074755  | ZZEF1       | -1.2 | 0.0001171 | 0.0010282 | 5.443   | 0.304  | 5.170   | 5.771   | 6.662   | 0.274 | 6.377   | 6.925   |
| 16361 | ENSG00000224063  |             | 6.3  | 0.1080558 | 0.2256231 | 0.067   | 0.058  | 0.000   | 0.101   | 0.000   | 0.000 | 0.000   | 0.000   |
| 16362 | ENSG00000279191  |             | 2.2  | 0.070368  | 0.1644593 | 0.226   | 0.076  | 0.154   | 0.306   | 0.102   | 0.012 | 0.092   | 0.116   |
| 16363 | ENSG00000241255  |             | -1.9 | 0.0021179 | 0.0106062 | 4.791   | 0.649  | 4.043   | 5.189   | 9.475   | 1.541 | 7.781   | 10.794  |
| 16364 | ENSG00000203635  |             | -1.8 | 0.0002259 | 0.0017593 | 2.288   | 0.588  | 1.620   | 2.724   | 4.242   | 0.159 | 4.069   | 4.384   |
| 16365 | ENSG00000247137  |             | -1.8 | 0.0013876 | 0.0076022 | 1.189   | 0.514  | 0.848   | 1.780   | 2.133   | 0.135 | 2.043   | 2.288   |
| 16368 | ENSG00000254339  |             | -1.8 | 1.36E-13  | 1.81E-11  | 98.587  | 11.265 | 87.657  | 110.159 | 178.787 | 9.009 | 168.584 | 185.648 |
| 16370 | ENSG00000254815  |             | -1.8 | 4.388E-05 | 0.0004598 | 2.388   | 0.365  | 2.157   | 2.809   | 4.441   | 0.826 | 3.589   | 5.239   |
| 16371 | ENSG00000255389  |             | -1.8 | 2.81E-06  | 4.522E-05 | 3.487   | 0.487  | 2.990   | 3.964   | 6.502   | 1.135 | 5.645   | 7.789   |
| 16372 | ENSG00000256008  |             | -1.8 | 0.0019611 | 0.0100172 | 2.118   | 0.793  | 1.319   | 2.905   | 3.993   | 0.460 | 3.470   | 4.333   |
| 16373 | ENSG00000257681  |             | -1.8 | 0.0028601 | 0.0135383 | 2.230   | 0.371  | 1.807   | 2.500   | 4.056   | 0.376 | 3.652   | 4.396   |
| 16374 | ENSG00000177359  |             | -1.7 | 4.388E-07 | 9.65E-06  | 2.908   | 0.331  | 2.716   | 3.290   | 4.973   | 0.457 | 4.603   | 5.483   |
| 16376 | ENSG00000204758  |             | -1.7 | 0.0082011 | 0.0311979 | 0.728   | 0.131  | 0.590   | 0.850   | 1.288   | 0.288 | 1.117   | 1.621   |
| 16377 | ENSG00000229271  |             | -1.7 | 0.0001589 | 0.0013211 | 14.661  | 1.907  | 12.573  | 16.312  | 25.850  | 1.053 | 24.735  | 26.828  |
| 16378 | ENSG00000232186  |             | -1.7 | 4.556E-07 | 9.982E-06 | 10.266  | 0.614  | 9.659   | 10.887  | 17.330  | 0.520 | 16.730  | 17.653  |
| 16379 | ENSG00000240731  |             | -1.7 | 0.000279  | 0.0020885 | 11.380  | 1.772  | 10.035  | 13.387  | 19.963  | 0.317 | 19.714  | 20.320  |
| 16380 | ENSG00000246982  |             | -1.7 | 0.004526  | 0.0195827 | 2.093   | 0.064  | 2.020   | 2.139   | 3.690   | 0.916 | 2.866   | 4.677   |
| 16381 | ENSG00000263786  |             | -1.7 | 0.0075655 | 0.0292937 | 2.479   | 0.013  | 2.471   | 2.493   | 4.446   | 0.560 | 3.899   | 5.017   |
| 16382 | ENSG00000272079  |             | -1.7 | 0.0061948 | 0.0249874 | 2.022   | 0.368  | 1.761   | 2.443   | 3.429   | 0.132 | 3.288   | 3.549   |
| 16383 | ENSG00000272693  |             | -1.7 | 0.0019143 | 0.0098293 | 1.607   | 0.154  | 1.430   | 1.709   | 2.793   | 0.194 | 2.591   | 2.977   |
| 16384 | ENSG00000272973  |             | -1.7 | 0.0018146 | 0.0094201 | 6.123   | 0.927  | 5.058   | 6.748   | 10.445  | 1.813 | 9.185   | 12.523  |
| 16385 | ENSG00000273619  |             | -1.7 | 0.0044166 | 0.0192077 | 4.728   | 0.905  | 4.015   | 5.747   | 8.309   | 1.578 | 6.496   | 9.365   |

|       | A               | B | C    | D         | E         | F       | G      | H       | I       | J       | K      | L       | M       |
|-------|-----------------|---|------|-----------|-----------|---------|--------|---------|---------|---------|--------|---------|---------|
| 16386 | ENSG00000274956 |   | -1.7 | 0.0048974 | 0.0208159 | 0.358   | 0.055  | 0.317   | 0.420   | 0.634   | 0.049  | 0.578   | 0.664   |
| 16387 | ENSG00000280287 |   | -1.7 | 0.0020034 | 0.0101842 | 1.313   | 0.593  | 0.840   | 1.978   | 2.283   | 0.489  | 1.859   | 2.817   |
| 16388 | ENSG00000272405 |   | 1.8  | 0.1051475 | 0.2210791 | 0.429   | 0.184  | 0.321   | 0.642   | 0.246   | 0.125  | 0.146   | 0.386   |
| 16389 | ENSG00000225616 |   | -1.6 | 0.0094721 | 0.0348569 | 8.204   | 0.242  | 8.029   | 8.481   | 13.610  | 1.793  | 12.101  | 15.593  |
| 16391 | ENSG00000253636 |   | -1.6 | 0.0007749 | 0.0047395 | 2.100   | 0.379  | 1.679   | 2.414   | 3.406   | 0.287  | 3.104   | 3.676   |
| 16392 | ENSG00000258649 |   | -1.6 | 1.06E-11  | 8.933E-10 | 93.383  | 5.707  | 87.812  | 99.217  | 152.986 | 8.069  | 147.400 | 162.237 |
| 16393 | ENSG00000260412 |   | -1.6 | 0.0086276 | 0.0323472 | 0.502   | 0.138  | 0.368   | 0.644   | 0.834   | 0.162  | 0.677   | 1.000   |
| 16394 | ENSG00000266709 |   | -1.6 | 1.566E-05 | 0.0001929 | 7.233   | 0.943  | 6.256   | 8.138   | 11.600  | 0.466  | 11.213  | 12.118  |
| 16395 | ENSG00000267506 |   | -1.6 | 0.0020042 | 0.0101852 | 0.768   | 0.077  | 0.698   | 0.851   | 1.261   | 0.163  | 1.084   | 1.407   |
| 16396 | ENSG00000196696 |   | -1.5 | 0.0004129 | 0.0028644 | 1.957   | 0.256  | 1.780   | 2.250   | 2.914   | 0.265  | 2.650   | 3.181   |
| 16398 | ENSG00000229852 |   | -1.5 | 0.0017682 | 0.0092327 | 1.038   | 0.167  | 0.865   | 1.198   | 1.555   | 0.029  | 1.529   | 1.586   |
| 16399 | ENSG00000237923 |   | -1.5 | 5.767E-06 | 8.393E-05 | 24.908  | 2.175  | 22.559  | 26.851  | 37.158  | 2.544  | 34.597  | 39.685  |
| 16400 | ENSG00000245552 |   | -1.5 | 0.0049919 | 0.0211229 | 0.807   | 0.118  | 0.672   | 0.888   | 1.269   | 0.065  | 1.197   | 1.323   |
| 16401 | ENSG00000260362 |   | -1.5 | 0.0038107 | 0.0170684 | 6.625   | 0.609  | 5.950   | 7.134   | 10.271  | 1.051  | 9.453   | 11.457  |
| 16403 | ENSG00000260668 |   | -1.5 | 0.0002602 | 0.0019735 | 13.010  | 0.850  | 12.505  | 13.992  | 20.240  | 1.167  | 19.129  | 21.455  |
| 16405 | ENSG00000260834 |   | -1.5 | 5.50E-15  | 1.08E-12  | 126.784 | 4.256  | 123.268 | 131.515 | 200.355 | 8.649  | 190.624 | 207.165 |
| 16406 | ENSG00000261526 |   | -1.5 | 4.675E-05 | 0.0004854 | 7.851   | 0.666  | 7.331   | 8.602   | 12.368  | 0.981  | 11.434  | 13.390  |
| 16408 | ENSG00000261716 |   | -1.5 | 1.113E-06 | 2.089E-05 | 5.399   | 0.851  | 4.504   | 6.197   | 8.264   | 0.206  | 8.027   | 8.405   |
| 16410 | ENSG00000263571 |   | -1.5 | 0.0064478 | 0.0257683 | 1.368   | 0.212  | 1.151   | 1.575   | 2.041   | 0.120  | 1.959   | 2.179   |
| 16411 | ENSG00000270605 |   | -1.5 | 0.0002056 | 0.0016275 | 8.528   | 0.460  | 8.043   | 8.957   | 12.703  | 1.191  | 11.901  | 14.072  |
| 16412 | ENSG00000280142 |   | -1.5 | 5.479E-07 | 1.168E-05 | 50.775  | 5.585  | 44.891  | 56.003  | 77.584  | 2.086  | 75.227  | 79.196  |
| 16413 | ENSG00000274893 |   | 1.6  | 0.0576466 | 0.1414036 | 1.101   | 0.045  | 1.069   | 1.152   | 0.689   | 0.351  | 0.330   | 1.031   |
| 16415 | ENSG00000205746 |   | -1.4 | 6.292E-07 | 1.304E-05 | 9.646   | 0.341  | 9.377   | 10.029  | 13.381  | 0.953  | 12.790  | 14.480  |
| 16416 | ENSG00000232098 |   | -1.4 | 0.0004043 | 0.0028141 | 4.161   | 0.488  | 3.655   | 4.628   | 5.943   | 0.344  | 5.587   | 6.273   |
| 16417 | ENSG00000232842 |   | -1.4 | 0.0001034 | 0.0009277 | 15.936  | 2.391  | 14.024  | 18.617  | 23.210  | 2.092  | 21.849  | 25.619  |
| 16418 | ENSG00000234072 |   | -1.4 | 0.0001217 | 0.0010607 | 8.384   | 0.500  | 7.823   | 8.780   | 11.730  | 1.143  | 10.660  | 12.934  |
| 16419 | ENSG00000235688 |   | -1.4 | 0.0002826 | 0.0021111 | 40.584  | 1.832  | 38.648  | 42.291  | 57.380  | 3.477  | 54.184  | 61.083  |
| 16420 | ENSG00000239559 |   | -1.4 | 0.0037521 | 0.0168525 | 36.925  | 3.460  | 34.577  | 40.898  | 51.052  | 4.533  | 46.173  | 55.132  |
| 16421 | ENSG00000246465 |   | -1.4 | 0.0011493 | 0.0065734 | 5.033   | 0.669  | 4.264   | 5.475   | 7.062   | 0.672  | 6.556   | 7.824   |
| 16422 | ENSG00000253838 |   | -1.4 | 0.0063696 | 0.0255139 | 91.499  | 13.396 | 76.717  | 102.838 | 128.015 | 17.375 | 113.466 | 147.253 |
| 16423 | ENSG00000269994 |   | -1.4 | 0.0050205 | 0.0212122 | 4.650   | 0.593  | 3.999   | 5.158   | 6.591   | 0.406  | 6.136   | 6.918   |
| 16424 | ENSG00000280987 |   | -1.4 | 3.91E-06  | 6.007E-05 | 6.091   | 0.533  | 5.556   | 6.621   | 8.551   | 0.331  | 8.309   | 8.929   |
| 16425 | ENSG00000282048 |   | -1.4 | 0.0056247 | 0.0232141 | 99.843  | 16.158 | 84.793  | 116.917 | 138.650 | 7.090  | 131.378 | 145.544 |
| 16426 | ENSG00000253200 |   | 1.5  | 0.06842   | 0.1609216 | 1.203   | 0.274  | 0.967   | 1.503   | 0.826   | 0.191  | 0.607   | 0.960   |
| 16427 | ENSG00000254365 |   | 1.5  | 0.0697698 | 0.1634121 | 32.720  | 16.199 | 20.510  | 51.097  | 22.710  | 2.671  | 19.895  | 25.209  |
| 16428 | ENSG00000254951 |   | 1.5  | 0.0582848 | 0.1425432 | 1.014   | 0.128  | 0.898   | 1.152   | 0.685   | 0.309  | 0.388   | 1.005   |
| 16429 | ENSG00000268220 |   | 1.5  | 0.1176899 | 0.2395871 | 1.138   | 0.400  | 0.829   | 1.589   | 0.777   | 0.071  | 0.703   | 0.843   |
| 16430 | ENSG00000279400 |   | 1.5  | 0.0554188 | 0.1374538 | 1.629   | 0.205  | 1.395   | 1.778   | 1.142   | 0.223  | 0.900   | 1.340   |
| 16431 | ENSG00000213090 |   | 1.4  | 0.0649192 | 0.154623  | 1.196   | 0.055  | 1.148   | 1.256   | 0.852   | 0.149  | 0.694   | 0.990   |
| 16432 | ENSG00000228010 |   | 1.4  | 0.1235595 | 0.2482787 | 2.297   | 0.869  | 1.301   | 2.903   | 1.664   | 0.291  | 1.356   | 1.935   |
| 16434 | ENSG00000232531 |   | 1.4  | 0.0683927 | 0.1608988 | 4.107   | 1.179  | 2.988   | 5.338   | 3.029   | 0.321  | 2.663   | 3.263   |
| 16435 | ENSG00000237868 |   | 1.4  | 0.0925159 | 0.2021344 | 7.472   | 0.358  | 7.154   | 7.860   | 5.567   | 1.188  | 4.215   | 6.446   |
| 16436 | ENSG00000253476 |   | 1.4  | 0.1242934 | 0.2493386 | 6.263   | 0.683  | 5.643   | 6.995   | 4.751   | 0.933  | 3.824   | 5.689   |

|       | A               | B | C    | D         | E         | F       | G      | H       | I       | J       | K      | L       | M       |
|-------|-----------------|---|------|-----------|-----------|---------|--------|---------|---------|---------|--------|---------|---------|
| 16438 | ENSG00000255121 |   | 1.4  | 0.0580915 | 0.1421906 | 3.932   | 1.026  | 3.166   | 5.098   | 2.885   | 1.043  | 1.973   | 4.022   |
| 16439 | ENSG00000259834 |   | 1.4  | 0.0779298 | 0.1777513 | 1.007   | 0.239  | 0.813   | 1.273   | 0.715   | 0.154  | 0.623   | 0.892   |
| 16440 | ENSG00000262587 |   | 1.4  | 0.0641599 | 0.1532916 | 3.859   | 0.406  | 3.409   | 4.199   | 2.882   | 0.579  | 2.222   | 3.310   |
| 16441 | ENSG00000269514 |   | 1.4  | 0.1028985 | 0.217622  | 0.881   | 0.224  | 0.648   | 1.094   | 0.639   | 0.186  | 0.515   | 0.852   |
| 16442 | ENSG00000274253 |   | 1.4  | 0.1196659 | 0.2422973 | 1.728   | 0.641  | 1.081   | 2.362   | 1.233   | 0.254  | 0.947   | 1.430   |
| 16443 | ENSG00000183458 |   | -1.3 | 0.0002961 | 0.002189  | 3.830   | 0.365  | 3.429   | 4.143   | 5.184   | 0.580  | 4.748   | 5.843   |
| 16444 | ENSG00000212978 |   | -1.3 | 0.0034652 | 0.0158109 | 5.592   | 0.662  | 5.037   | 6.326   | 7.414   | 0.624  | 6.893   | 8.105   |
| 16445 | ENSG00000214558 |   | -1.3 | 0.0011729 | 0.0066859 | 8.140   | 1.103  | 6.869   | 8.838   | 10.774  | 0.331  | 10.572  | 11.155  |
| 16446 | ENSG00000279048 |   | 1.4  | 0.0567535 | 0.1396381 | 1.734   | 0.403  | 1.478   | 2.198   | 1.249   | 0.141  | 1.163   | 1.412   |
| 16447 | ENSG00000217835 |   | -1.3 | 0.0020763 | 0.0104512 | 17.074  | 2.792  | 14.860  | 20.210  | 23.141  | 1.360  | 21.961  | 24.629  |
| 16448 | ENSG00000224126 |   | -1.3 | 6.54E-05  | 0.000639  | 84.513  | 0.851  | 83.531  | 85.044  | 111.361 | 8.389  | 105.884 | 121.019 |
| 16449 | ENSG00000282304 |   | 1.4  | 0.0633353 | 0.1518988 | 4.477   | 0.450  | 3.963   | 4.796   | 3.328   | 0.144  | 3.221   | 3.492   |
| 16450 | ENSG00000227827 |   | -1.3 | 3.355E-05 | 0.0003659 | 3.237   | 0.165  | 3.050   | 3.362   | 4.402   | 0.346  | 4.147   | 4.796   |
| 16451 | ENSG00000228709 |   | -1.3 | 0.0026946 | 0.0129469 | 13.370  | 0.946  | 12.579  | 14.418  | 18.101  | 0.614  | 17.539  | 18.756  |
| 16452 | ENSG00000233223 |   | -1.3 | 0.0014242 | 0.0077602 | 19.887  | 2.297  | 17.874  | 22.390  | 26.710  | 1.958  | 24.449  | 27.889  |
| 16453 | ENSG00000235560 |   | -1.3 | 0.0025336 | 0.0123029 | 6.487   | 0.607  | 5.822   | 7.013   | 8.954   | 1.190  | 7.876   | 10.231  |
| 16454 | ENSG00000244560 |   | -1.3 | 0.0090666 | 0.033628  | 2.670   | 0.113  | 2.594   | 2.800   | 3.533   | 0.250  | 3.273   | 3.772   |
| 16455 | ENSG00000248605 |   | -1.3 | 1.455E-06 | 2.593E-05 | 64.195  | 7.576  | 58.447  | 72.780  | 86.178  | 0.439  | 85.680  | 86.511  |
| 16456 | ENSG00000262160 |   | -1.3 | 0.0026563 | 0.0128031 | 8.769   | 1.143  | 7.998   | 10.082  | 11.289  | 0.977  | 10.683  | 12.416  |
| 16457 | ENSG00000267194 |   | -1.3 | 0.0073359 | 0.028529  | 8.617   | 1.326  | 7.257   | 9.906   | 11.091  | 1.565  | 9.613   | 12.730  |
| 16458 | ENSG00000272106 |   | -1.3 | 0.008305  | 0.0314624 | 8.794   | 0.915  | 7.974   | 9.780   | 11.308  | 0.510  | 10.973  | 11.895  |
| 16459 | ENSG00000273015 |   | -1.3 | 1.454E-05 | 0.0001818 | 9.038   | 0.627  | 8.321   | 9.484   | 11.627  | 0.392  | 11.189  | 11.943  |
| 16460 | ENSG00000274090 |   | -1.3 | 0.0002046 | 0.0016213 | 267.336 | 27.863 | 247.688 | 299.224 | 357.641 | 14.269 | 344.294 | 372.682 |
| 16461 | ENSG00000274925 |   | -1.3 | 0.0036808 | 0.0166055 | 5.706   | 0.194  | 5.498   | 5.881   | 7.495   | 0.591  | 7.130   | 8.176   |
| 16462 | ENSG00000279088 |   | -1.3 | 7.967E-05 | 0.0007506 | 29.277  | 1.214  | 27.965  | 30.361  | 39.291  | 2.331  | 37.075  | 41.722  |
| 16463 | ENSG00000279342 |   | -1.3 | 0.0079483 | 0.0304571 | 5.242   | 0.337  | 4.871   | 5.528   | 6.855   | 0.681  | 6.118   | 7.461   |
| 16464 | ENSG00000280123 |   | -1.3 | 0.0010195 | 0.0059664 | 14.698  | 0.982  | 13.564  | 15.269  | 18.957  | 0.792  | 18.176  | 19.760  |
| 16465 | ENSG00000280511 |   | -1.3 | 2.839E-07 | 6.688E-06 | 211.994 | 17.722 | 196.074 | 231.089 | 287.369 | 20.034 | 269.736 | 309.153 |
| 16466 | ENSG00000272583 |   | 2.1  | 0.0107193 | 0.0385408 | 4.793   | 1.955  | 2.546   | 6.101   | 2.296   | 0.546  | 1.673   | 2.697   |
| 16468 | ENSG00000254297 |   | 2    | 0.0291504 | 0.0844068 | 36.853  | 20.513 | 20.922  | 59.999  | 18.700  | 5.085  | 14.859  | 24.466  |
| 16469 | ENSG00000197462 |   | 1.3  | 0.113449  | 0.233256  | 72.079  | 22.810 | 57.661  | 98.377  | 58.082  | 2.847  | 54.796  | 59.816  |
| 16470 | ENSG00000280239 |   | 1.8  | 0.0174237 | 0.056616  | 1.493   | 0.366  | 1.176   | 1.894   | 0.859   | 0.257  | 0.576   | 1.080   |
| 16471 | ENSG00000265273 |   | 1.7  | 0.0149818 | 0.0503954 | 1.987   | 0.150  | 1.861   | 2.153   | 1.170   | 0.345  | 0.916   | 1.563   |
| 16472 | ENSG00000272983 |   | 1.7  | 0.0235316 | 0.0715979 | 0.454   | 0.068  | 0.377   | 0.502   | 0.273   | 0.072  | 0.220   | 0.354   |
| 16473 | ENSG00000203739 |   | 1.3  | 0.0979063 | 0.2100598 | 2.098   | 0.414  | 1.697   | 2.525   | 1.628   | 0.134  | 1.536   | 1.782   |
| 16474 | ENSG00000215895 |   | 1.6  | 0.0262649 | 0.0778438 | 1.491   | 0.237  | 1.218   | 1.647   | 0.947   | 0.131  | 0.806   | 1.064   |
| 16475 | ENSG00000258734 |   | 1.6  | 0.0162822 | 0.0538272 | 7.878   | 1.144  | 6.582   | 8.746   | 4.941   | 0.977  | 4.021   | 5.967   |
| 16476 | ENSG00000259033 |   | 1.6  | 0.0131784 | 0.0455334 | 11.577  | 2.660  | 8.574   | 13.635  | 7.264   | 1.339  | 5.893   | 8.568   |
| 16477 | ENSG00000267547 |   | 1.6  | 0.0462554 | 0.119657  | 4.230   | 0.578  | 3.577   | 4.674   | 2.673   | 0.301  | 2.330   | 2.892   |
| 16478 | ENSG00000275494 |   | 1.6  | 0.0193579 | 0.0613915 | 6.935   | 0.496  | 6.363   | 7.254   | 4.384   | 0.308  | 4.072   | 4.688   |
| 16479 | ENSG00000279789 |   | 1.6  | 0.0180745 | 0.0583162 | 1.598   | 0.031  | 1.562   | 1.616   | 1.040   | 0.080  | 0.989   | 1.133   |
| 16480 | ENSG00000280099 |   | 1.6  | 0.0266846 | 0.07875   | 2.415   | 0.223  | 2.237   | 2.666   | 1.587   | 0.447  | 1.085   | 1.944   |
| 16481 | ENSG00000228274 |   | 1.5  | 0.0106019 | 0.0382241 | 1.574   | 0.276  | 1.275   | 1.819   | 1.065   | 0.227  | 0.838   | 1.292   |

|       | A               | B | C   | D         | E         | F      | G     | H      | I      | J      | K     | L      | M      |
|-------|-----------------|---|-----|-----------|-----------|--------|-------|--------|--------|--------|-------|--------|--------|
| 16482 | ENSG00000215493 |   | 1.3 | 0.1164853 | 0.2378506 | 2.697  | 0.235 | 2.428  | 2.863  | 2.131  | 0.231 | 1.911  | 2.371  |
| 16483 | ENSG00000231466 |   | 1.5 | 0.0412719 | 0.1095295 | 4.145  | 0.598 | 3.725  | 4.830  | 2.834  | 0.404 | 2.406  | 3.209  |
| 16484 | ENSG00000243440 |   | 1.5 | 0.0312991 | 0.0891783 | 2.821  | 0.616 | 2.208  | 3.441  | 1.927  | 0.967 | 0.828  | 2.650  |
| 16485 | ENSG00000250746 |   | 1.5 | 0.0150061 | 0.050457  | 2.799  | 0.671 | 2.209  | 3.529  | 1.936  | 0.188 | 1.774  | 2.142  |
| 16486 | ENSG00000254946 |   | 1.5 | 0.0370833 | 0.1010131 | 6.922  | 1.512 | 5.692  | 8.610  | 4.675  | 1.479 | 3.013  | 5.845  |
| 16487 | ENSG00000259562 |   | 1.5 | 0.0163271 | 0.0539547 | 7.811  | 1.516 | 6.860  | 9.560  | 5.451  | 0.927 | 4.693  | 6.483  |
| 16488 | ENSG00000232063 |   | 1.3 | 0.0892361 | 0.1967989 | 2.169  | 0.103 | 2.102  | 2.288  | 1.672  | 0.279 | 1.351  | 1.855  |
| 16489 | ENSG00000233178 |   | 1.3 | 0.0945995 | 0.205413  | 1.374  | 0.333 | 1.032  | 1.696  | 1.077  | 0.132 | 0.988  | 1.229  |
| 16490 | ENSG00000260686 |   | 1.5 | 0.04244   | 0.1118573 | 1.925  | 0.578 | 1.300  | 2.440  | 1.321  | 0.347 | 0.927  | 1.580  |
| 16491 | ENSG00000266865 |   | 1.5 | 0.0112793 | 0.0401446 | 2.587  | 0.234 | 2.430  | 2.856  | 1.727  | 0.342 | 1.506  | 2.122  |
| 16492 | ENSG00000268379 |   | 1.5 | 0.0468461 | 0.1208155 | 1.634  | 0.395 | 1.354  | 2.085  | 1.117  | 0.095 | 1.019  | 1.208  |
| 16493 | ENSG00000236048 |   | 1.3 | 0.0663995 | 0.1574835 | 4.487  | 0.902 | 3.526  | 5.317  | 3.450  | 0.776 | 2.601  | 4.123  |
| 16494 | ENSG00000237310 |   | 1.3 | 0.1027672 | 0.2173986 | 12.520 | 1.812 | 10.484 | 13.953 | 10.232 | 1.047 | 9.203  | 11.295 |
| 16495 | ENSG00000237863 |   | 1.3 | 0.0877389 | 0.1943587 | 4.681  | 0.467 | 4.142  | 4.973  | 3.729  | 0.517 | 3.132  | 4.043  |
| 16496 | ENSG00000240132 |   | 1.3 | 0.0731274 | 0.1694483 | 5.245  | 0.217 | 5.120  | 5.496  | 4.154  | 1.647 | 2.350  | 5.577  |
| 16497 | ENSG00000272821 |   | 1.5 | 0.0330885 | 0.0930537 | 4.965  | 1.242 | 4.144  | 6.393  | 3.408  | 0.851 | 2.906  | 4.390  |
| 16498 | ENSG00000273001 |   | 1.5 | 0.0213447 | 0.0663366 | 9.489  | 2.274 | 8.174  | 12.115 | 6.607  | 0.842 | 6.063  | 7.576  |
| 16499 | ENSG00000281091 |   | 1.5 | 0.0290908 | 0.0842633 | 11.807 | 3.304 | 8.794  | 15.340 | 8.136  | 1.162 | 6.863  | 9.140  |
| 16500 | ENSG00000179859 |   | 1.4 | 0.0239011 | 0.0724312 | 1.857  | 0.311 | 1.500  | 2.069  | 1.320  | 0.276 | 1.157  | 1.639  |
| 16501 | ENSG00000214654 |   | 1.4 | 0.012816  | 0.0444904 | 5.387  | 0.366 | 5.159  | 5.810  | 3.990  | 0.845 | 3.036  | 4.644  |
| 16502 | ENSG00000237594 |   | 1.4 | 0.0466445 | 0.1204426 | 6.246  | 1.617 | 4.673  | 7.903  | 4.585  | 0.287 | 4.376  | 4.912  |
| 16503 | ENSG00000258815 |   | 1.4 | 0.0478081 | 0.1226978 | 10.084 | 1.284 | 8.819  | 11.386 | 7.266  | 1.480 | 5.726  | 8.678  |
| 16504 | ENSG00000260461 |   | 1.4 | 0.029983  | 0.0862565 | 2.627  | 0.436 | 2.288  | 3.119  | 1.929  | 0.268 | 1.677  | 2.211  |
| 16505 | ENSG00000276334 |   | 1.4 | 0.0333831 | 0.09367   | 3.353  | 0.680 | 2.915  | 4.136  | 2.395  | 0.257 | 2.108  | 2.605  |
| 16506 | ENSG00000254701 |   | 1.3 | 0.0982568 | 0.2105965 | 7.368  | 0.550 | 6.755  | 7.820  | 5.719  | 1.029 | 4.767  | 6.810  |
| 16507 | ENSG00000276846 |   | 1.4 | 0.032928  | 0.0927777 | 7.347  | 1.010 | 6.671  | 8.508  | 5.304  | 1.420 | 3.712  | 6.439  |
| 16508 | ENSG00000282012 |   | 1.4 | 0.0166925 | 0.0548515 | 11.416 | 2.607 | 8.414  | 13.107 | 8.241  | 1.023 | 7.068  | 8.945  |
| 16509 | ENSG00000215154 |   | 1.3 | 0.0240118 | 0.0726628 | 5.347  | 0.488 | 4.865  | 5.841  | 4.326  | 0.650 | 3.610  | 4.880  |
| 16510 | ENSG00000225302 |   | 1.3 | 0.0268555 | 0.079138  | 2.394  | 0.310 | 2.092  | 2.712  | 1.875  | 0.512 | 1.398  | 2.417  |
| 16511 | ENSG00000260025 |   | 1.3 | 0.0774265 | 0.1768419 | 20.087 | 4.123 | 15.468 | 23.397 | 16.011 | 2.845 | 12.729 | 17.783 |
| 16512 | ENSG00000260521 |   | 1.3 | 0.0944906 | 0.2052556 | 4.013  | 1.170 | 3.076  | 5.325  | 3.144  | 0.318 | 2.780  | 3.365  |
| 16514 | ENSG00000232320 |   | 1.3 | 0.0397031 | 0.1063254 | 28.516 | 3.729 | 26.004 | 32.800 | 23.161 | 4.348 | 19.595 | 28.005 |
| 16515 | ENSG00000232533 |   | 1.3 | 0.0109632 | 0.0392507 | 30.707 | 0.547 | 30.076 | 31.039 | 24.713 | 3.890 | 22.406 | 29.204 |
| 16516 | ENSG00000240809 |   | 1.3 | 0.0362291 | 0.0993907 | 6.735  | 0.367 | 6.388  | 7.120  | 5.360  | 0.869 | 4.545  | 6.274  |
| 16517 | ENSG00000261620 |   | 1.3 | 0.1187974 | 0.2410004 | 10.894 | 1.668 | 9.049  | 12.295 | 8.658  | 1.667 | 7.338  | 10.532 |
| 16518 | ENSG00000254510 |   | 1.3 | 0.0185747 | 0.0594403 | 7.536  | 0.371 | 7.109  | 7.771  | 5.750  | 0.683 | 5.057  | 6.422  |
| 16520 | ENSG00000255085 |   | 1.3 | 0.0393404 | 0.1056135 | 5.494  | 0.649 | 5.055  | 6.240  | 4.321  | 0.779 | 3.775  | 5.213  |
| 16521 | ENSG00000269825 |   | 1.3 | 0.1086565 | 0.2265418 | 2.026  | 0.904 | 1.151  | 2.957  | 1.571  | 0.234 | 1.309  | 1.758  |
| 16522 | ENSG00000272578 |   | 1.3 | 0.1042508 | 0.2197319 | 1.072  | 0.046 | 1.024  | 1.116  | 0.870  | 0.134 | 0.758  | 1.019  |
| 16523 | ENSG00000273448 |   | 1.3 | 0.0963802 | 0.2077857 | 3.600  | 0.919 | 2.763  | 4.583  | 2.802  | 0.203 | 2.574  | 2.962  |
| 16524 | ENSG00000261116 |   | 1.3 | 0.0233935 | 0.071302  | 5.108  | 0.152 | 4.933  | 5.197  | 3.974  | 0.797 | 3.155  | 4.748  |
| 16525 | ENSG00000278066 |   | 1.3 | 0.0683713 | 0.1608742 | 10.609 | 0.533 | 10.295 | 11.225 | 8.494  | 0.484 | 7.984  | 8.948  |
| 16526 | ENSG00000261167 |   | 1.3 | 0.025924  | 0.0770161 | 3.335  | 0.281 | 3.063  | 3.625  | 2.597  | 0.360 | 2.297  | 2.996  |



|       | A               | B | C    | D         | E         | F       | G      | H       | I       | J       | K      | L       | M       |
|-------|-----------------|---|------|-----------|-----------|---------|--------|---------|---------|---------|--------|---------|---------|
| 16527 | ENSG00000261490 |   | 1.3  | 0.0254776 | 0.0760641 | 2.504   | 0.609  | 1.810   | 2.944   | 1.907   | 0.051  | 1.858   | 1.961   |
| 16528 | ENSG00000278573 |   | 1.3  | 0.0687168 | 0.1615298 | 8.020   | 0.630  | 7.479   | 8.712   | 6.150   | 0.360  | 5.813   | 6.528   |
| 16529 | ENSG00000279095 |   | 1.3  | 0.0705031 | 0.1646759 | 3.896   | 0.537  | 3.276   | 4.225   | 3.153   | 0.551  | 2.545   | 3.621   |
| 16530 | ENSG00000279369 |   | 1.3  | 0.0971086 | 0.2088236 | 2.896   | 0.316  | 2.614   | 3.238   | 2.290   | 0.416  | 1.830   | 2.639   |
| 16531 | ENSG00000274114 |   | 1.3  | 0.0386211 | 0.1040787 | 1.939   | 0.159  | 1.780   | 2.099   | 1.503   | 0.258  | 1.206   | 1.665   |
| 16532 | ENSG00000280114 |   | 1.3  | 0.0940741 | 0.2045333 | 3.528   | 0.449  | 3.081   | 3.978   | 2.755   | 0.447  | 2.270   | 3.150   |
| 16533 | ENSG00000279117 |   | 1.3  | 0.017233  | 0.0561115 | 13.447  | 3.321  | 11.058  | 17.240  | 10.818  | 1.498  | 9.100   | 11.849  |
| 16534 | ENSG00000152117 |   | -1.2 | 5.218E-05 | 0.0005297 | 19.359  | 0.988  | 18.225  | 20.035  | 24.627  | 1.546  | 23.430  | 26.373  |
| 16535 | ENSG00000176593 |   | -1.2 | 0.0062996 | 0.0253077 | 5.084   | 0.384  | 4.646   | 5.360   | 6.091   | 0.367  | 5.698   | 6.425   |
| 16536 | ENSG00000183889 |   | -1.2 | 0.0014832 | 0.0080146 | 3.958   | 0.051  | 3.911   | 4.013   | 4.957   | 0.300  | 4.700   | 5.286   |
| 16537 | ENSG00000213280 |   | -1.2 | 2.85E-05  | 0.0003199 | 260.525 | 11.027 | 249.398 | 271.449 | 321.343 | 19.527 | 299.812 | 337.906 |
| 16538 | ENSG00000216285 |   | -1.2 | 7.379E-06 | 0.0001029 | 292.122 | 9.739  | 282.174 | 301.638 | 355.269 | 28.924 | 321.880 | 372.661 |
| 16539 | ENSG00000233024 |   | -1.2 | 0.0064108 | 0.0256524 | 9.494   | 0.302  | 9.169   | 9.766   | 11.622  | 0.681  | 10.989  | 12.343  |
| 16540 | ENSG00000251095 |   | -1.2 | 0.0002022 | 0.0016106 | 63.283  | 5.367  | 60.144  | 69.480  | 80.768  | 5.604  | 76.920  | 87.197  |
| 16541 | ENSG00000260261 |   | -1.2 | 0.0073087 | 0.0284559 | 6.430   | 0.967  | 5.338   | 7.175   | 8.187   | 0.778  | 7.451   | 9.001   |
| 16542 | ENSG00000260404 |   | -1.2 | 0.0035859 | 0.0162554 | 6.616   | 0.246  | 6.424   | 6.893   | 8.162   | 0.515  | 7.750   | 8.739   |
| 16543 | ENSG00000260912 |   | -1.2 | 0.0032946 | 0.0151869 | 13.969  | 1.266  | 13.007  | 15.403  | 17.725  | 1.922  | 15.569  | 19.261  |
| 16544 | ENSG00000264112 |   | -1.2 | 0.0005309 | 0.0035163 | 12.072  | 0.159  | 11.889  | 12.176  | 14.930  | 1.162  | 13.589  | 15.649  |
| 16545 | ENSG00000282458 |   | -1.2 | 0.0013453 | 0.0074213 | 6.174   | 0.207  | 6.045   | 6.413   | 7.636   | 0.239  | 7.437   | 7.900   |
| 16546 | ENSG00000226268 |   | 1.2  | 0.0255276 | 0.0761595 | 30.668  | 0.197  | 30.452  | 30.838  | 26.682  | 3.955  | 23.886  | 31.207  |
| 16547 | ENSG00000233087 |   | 1.2  | 0.1112168 | 0.2302254 | 3.587   | 0.418  | 3.135   | 3.960   | 3.077   | 0.429  | 2.740   | 3.560   |
| 16548 | ENSG00000233184 |   | 1.2  | 0.0408473 | 0.1086257 | 5.474   | 0.835  | 4.774   | 6.399   | 4.561   | 0.753  | 3.937   | 5.397   |
| 16549 | ENSG00000237087 |   | 1.2  | 0.0411928 | 0.1093509 | 37.226  | 8.543  | 28.984  | 46.041  | 31.056  | 2.028  | 29.843  | 33.398  |
| 16551 | ENSG00000238165 |   | 1.2  | 0.1098922 | 0.22833   | 32.516  | 5.155  | 29.174  | 38.453  | 27.034  | 2.456  | 24.199  | 28.504  |
| 16552 | ENSG00000246090 |   | 1.2  | 0.0198823 | 0.0627133 | 2.771   | 0.052  | 2.714   | 2.818   | 2.346   | 0.108  | 2.234   | 2.450   |
| 16553 | ENSG00000249042 |   | 1.2  | 0.0539816 | 0.1347388 | 19.192  | 3.446  | 15.231  | 21.503  | 16.515  | 0.491  | 16.010  | 16.992  |
| 16554 | ENSG00000253204 |   | 1.2  | 0.1191673 | 0.2416313 | 38.596  | 4.391  | 33.646  | 42.020  | 33.289  | 6.316  | 27.194  | 39.805  |
| 16555 | ENSG00000254373 |   | 1.2  | 0.1099473 | 0.2283885 | 39.605  | 2.527  | 36.687  | 41.088  | 33.987  | 6.521  | 27.555  | 40.594  |
| 16556 | ENSG00000258895 |   | 1.2  | 0.1023306 | 0.2166376 | 14.768  | 1.615  | 12.919  | 15.901  | 12.283  | 1.066  | 11.072  | 13.083  |
| 16557 | ENSG00000259865 |   | 1.2  | 0.0689231 | 0.1618798 | 11.510  | 0.866  | 11.001  | 12.509  | 9.693   | 1.487  | 8.288   | 11.251  |
| 16558 | ENSG00000260075 |   | 1.2  | 0.0168331 | 0.0552063 | 12.893  | 0.614  | 12.184  | 13.275  | 10.760  | 1.229  | 9.530   | 11.988  |
| 16559 | ENSG00000261189 |   | 1.2  | 0.1009805 | 0.2145313 | 8.169   | 1.417  | 6.543   | 9.145   | 6.699   | 0.820  | 5.946   | 7.573   |
| 16560 | ENSG00000261780 |   | 1.2  | 0.0581782 | 0.1423153 | 13.005  | 3.566  | 9.701   | 16.785  | 11.122  | 0.895  | 10.479  | 12.144  |
| 16561 | ENSG00000268225 |   | 1.2  | 0.1027406 | 0.2173696 | 17.399  | 1.710  | 15.747  | 19.161  | 15.454  | 1.144  | 14.279  | 16.564  |
| 16562 | ENSG00000269937 |   | 1.2  | 0.1138532 | 0.2338027 | 1.928   | 0.349  | 1.608   | 2.301   | 1.590   | 0.246  | 1.388   | 1.863   |
| 16563 | ENSG00000272316 |   | 1.2  | 0.0666899 | 0.1579764 | 4.563   | 0.617  | 3.963   | 5.197   | 3.986   | 0.377  | 3.724   | 4.418   |
| 16564 | ENSG00000273117 |   | 1.2  | 0.0138359 | 0.0473313 | 15.353  | 0.824  | 14.465  | 16.092  | 12.955  | 0.717  | 12.240  | 13.675  |
| 16565 | ENSG00000273247 |   | 1.2  | 0.0232044 | 0.0708149 | 2.713   | 0.146  | 2.545   | 2.810   | 2.265   | 0.236  | 1.993   | 2.419   |
| 16566 | ENSG00000279348 |   | 1.2  | 0.0910864 | 0.2001747 | 4.479   | 0.480  | 4.119   | 5.024   | 3.663   | 1.091  | 2.524   | 4.697   |
| 16567 | ENSG00000280056 |   | 1.2  | 0.1040738 | 0.2195037 | 79.740  | 8.703  | 70.816  | 88.203  | 67.450  | 11.456 | 56.466  | 79.325  |
| 16568 | ENSG00000280128 |   | 1.2  | 0.0223132 | 0.0686025 | 8.658   | 0.748  | 8.212   | 9.522   | 7.420   | 0.744  | 6.575   | 7.976   |
| 16569 | ENSG00000280322 |   | 1.2  | 0.116527  | 0.2379068 | 13.102  | 1.626  | 11.250  | 14.296  | 11.263  | 1.959  | 9.058   | 12.800  |
| 16570 | ENSG00000282978 |   | 1.2  | 0.038009  | 0.102877  | 35.928  | 1.752  | 33.932  | 37.211  | 30.134  | 4.900  | 24.477  | 33.072  |

|       | A               | B | C    | D         | E         | F        | G      | H        | I        | J        | K       | L        | M        |
|-------|-----------------|---|------|-----------|-----------|----------|--------|----------|----------|----------|---------|----------|----------|
| 16571 | ENSG00000283674 |   | 1.2  | 0.0263861 | 0.078101  | 3.521    | 0.246  | 3.237    | 3.670    | 2.920    | 0.188   | 2.706    | 3.058    |
| 16572 | ENSG00000183199 |   | -1.1 | 0.0070024 | 0.0275221 | 142.752  | 1.128  | 141.535  | 143.763  | 158.552  | 1.785   | 156.723  | 160.290  |
| 16573 | ENSG00000186076 |   | -1.1 | 0.0001931 | 0.0015523 | 449.949  | 3.685  | 445.736  | 452.572  | 521.281  | 39.857  | 475.678  | 549.454  |
| 16574 | ENSG00000189343 |   | -1.1 | 0.0066576 | 0.0264444 | 1095.445 | 3.466  | 1093.351 | 1099.446 | 1203.727 | 62.443  | 1153.281 | 1273.566 |
| 16575 | ENSG00000196656 |   | -1.1 | 0.0078367 | 0.0301371 | 249.776  | 3.622  | 246.343  | 253.561  | 282.031  | 8.396   | 273.775  | 290.560  |
| 16576 | ENSG00000226121 |   | -1.1 | 0.00921   | 0.0340333 | 15.771   | 0.398  | 15.355   | 16.148   | 17.960   | 1.100   | 16.860   | 19.060   |
| 16578 | ENSG00000228532 |   | -1.1 | 0.002752  | 0.0131707 | 482.757  | 20.491 | 459.724  | 498.960  | 553.177  | 16.761  | 536.727  | 570.232  |
| 16579 | ENSG00000235552 |   | -1.1 | 0.0019048 | 0.0097918 | 1453.216 | 23.718 | 1437.759 | 1480.524 | 1606.867 | 44.376  | 1577.531 | 1657.919 |
| 16580 | ENSG00000240376 |   | -1.1 | 0.008655  | 0.0324285 | 340.173  | 26.359 | 309.765  | 356.515  | 381.951  | 18.090  | 364.418  | 400.550  |
| 16581 | ENSG00000242299 |   | -1.1 | 0.0021691 | 0.0107966 | 1222.040 | 47.704 | 1168.079 | 1258.604 | 1378.268 | 40.331  | 1334.248 | 1413.441 |
| 16582 | ENSG00000243199 |   | -1.1 | 0.0002127 | 0.0016724 | 458.969  | 3.747  | 455.621  | 463.016  | 525.191  | 7.011   | 518.022  | 532.033  |
| 16584 | ENSG00000244313 |   | -1.1 | 0.0006745 | 0.0042518 | 1767.476 | 61.619 | 1712.292 | 1833.964 | 2007.825 | 96.779  | 1939.621 | 2118.591 |
| 16585 | ENSG00000249532 |   | -1.1 | 0.0004919 | 0.0033082 | 2077.291 | 94.432 | 1968.265 | 2133.314 | 2415.883 | 120.315 | 2333.671 | 2553.976 |
| 16586 | ENSG00000249790 |   | -1.1 | 6.231E-05 | 0.0006138 | 153.521  | 6.594  | 148.151  | 160.881  | 179.093  | 8.256   | 169.562  | 184.058  |
| 16587 | ENSG00000254277 |   | -1.1 | 0.0052161 | 0.0218033 | 190.308  | 6.877  | 185.749  | 198.218  | 216.592  | 12.611  | 203.006  | 227.924  |
| 16588 | ENSG00000170846 |   | 1.1  | 0.020139  | 0.0634166 | 26.178   | 0.536  | 25.816   | 26.795   | 23.821   | 1.197   | 22.491   | 24.812   |
| 16589 | ENSG00000198134 |   | 1.1  | 0.1236655 | 0.248449  | 76.874   | 8.224  | 67.388   | 81.987   | 69.838   | 6.190   | 62.810   | 74.482   |
| 16590 | ENSG00000204745 |   | 1.1  | 0.1178045 | 0.2397338 | 21.860   | 0.109  | 21.744   | 21.960   | 20.890   | 1.203   | 19.720   | 22.124   |
| 16591 | ENSG00000214019 |   | 1.1  | 0.112204  | 0.2316537 | 14.099   | 1.384  | 12.629   | 15.378   | 12.697   | 0.266   | 12.394   | 12.893   |
| 16592 | ENSG00000216775 |   | 1.1  | 0.0717086 | 0.1668925 | 25.196   | 0.822  | 24.365   | 26.009   | 23.597   | 1.847   | 21.666   | 25.347   |
| 16593 | ENSG00000227288 |   | 1.1  | 0.0372485 | 0.1012906 | 38.748   | 2.829  | 35.860   | 41.514   | 35.342   | 3.749   | 31.136   | 38.329   |
| 16594 | ENSG00000227671 |   | 1.1  | 0.0263992 | 0.0781258 | 52.536   | 6.878  | 47.799   | 60.425   | 47.790   | 2.507   | 46.268   | 50.684   |
| 16596 | ENSG00000228335 |   | 1.1  | 0.1166412 | 0.2379965 | 33.638   | 1.872  | 31.499   | 34.976   | 30.214   | 0.885   | 29.502   | 31.205   |
| 16597 | ENSG00000230623 |   | 1.1  | 0.0175272 | 0.0568322 | 60.298   | 2.790  | 57.783   | 63.299   | 56.088   | 4.795   | 50.596   | 59.443   |
| 16598 | ENSG00000231747 |   | 1.1  | 0.0919675 | 0.2013263 | 84.201   | 10.729 | 71.812   | 90.458   | 75.297   | 6.645   | 69.190   | 82.374   |
| 16599 | ENSG00000235105 |   | 1.1  | 0.0388752 | 0.1045471 | 31.072   | 1.925  | 29.572   | 33.242   | 27.766   | 3.314   | 24.916   | 31.402   |
| 16600 | ENSG00000237493 |   | 1.1  | 0.0127206 | 0.0442142 | 141.033  | 11.045 | 130.855  | 152.778  | 128.422  | 4.930   | 122.737  | 131.516  |
| 16601 | ENSG00000247134 |   | 1.1  | 0.0342177 | 0.0953913 | 85.514   | 3.965  | 81.885   | 89.745   | 78.526   | 5.557   | 72.879   | 83.989   |
| 16602 | ENSG00000254719 |   | 1.1  | 0.1246693 | 0.2499444 | 98.858   | 7.022  | 93.932   | 106.898  | 89.116   | 9.067   | 81.574   | 99.175   |
| 16603 | ENSG00000254893 |   | 1.1  | 0.0131064 | 0.0453218 | 101.146  | 1.080  | 100.097  | 102.255  | 94.884   | 4.096   | 91.267   | 99.331   |
| 16604 | ENSG00000256663 |   | 1.1  | 0.0734811 | 0.1699653 | 17.778   | 2.217  | 16.123   | 20.297   | 15.818   | 1.280   | 14.484   | 17.036   |
| 16605 | ENSG00000257773 |   | 1.1  | 0.0258353 | 0.0768742 | 40.662   | 0.424  | 40.215   | 41.059   | 36.551   | 0.480   | 36.096   | 37.052   |
| 16606 | ENSG00000259959 |   | 1.1  | 0.1170027 | 0.2385326 | 8.086    | 0.798  | 7.241    | 8.827    | 7.396    | 1.026   | 6.563    | 8.542    |
| 16607 | ENSG00000272779 |   | 1.1  | 0.1002225 | 0.2135648 | 48.484   | 0.842  | 47.731   | 49.392   | 45.445   | 3.150   | 43.365   | 49.070   |
| 16608 | ENSG00000273654 |   | 1.1  | 0.0923713 | 0.20191   | 33.380   | 1.481  | 32.127   | 35.015   | 31.042   | 2.036   | 29.176   | 33.214   |
| 16609 | ENSG00000277103 |   | 1.1  | 0.11213   | 0.2315574 | 22.551   | 0.164  | 22.381   | 22.709   | 20.239   | 0.800   | 19.330   | 20.835   |
| 16610 | ENSG00000279307 |   | 1.1  | 0.079374  | 0.1802433 | 50.211   | 0.911  | 49.370   | 51.179   | 44.821   | 7.894   | 36.033   | 51.310   |
| 16611 | ENSG00000185641 |   | -1   | 0.1110981 | 0.2300442 | 1444.929 | 50.263 | 1410.031 | 1502.540 | 1545.205 | 27.295  | 1524.576 | 1576.155 |
| 16612 | ENSG00000244398 |   | -1   | 0.0912004 | 0.2003731 | 3529.469 | 49.101 | 3491.658 | 3584.961 | 3759.231 | 119.060 | 3651.234 | 3886.904 |
| 16613 | ENSG00000283041 |   | -1   | 0.1079611 | 0.2254811 | 1511.761 | 28.329 | 1484.153 | 1540.760 | 1606.198 | 46.024  | 1553.208 | 1636.199 |
| 16614 | ENSG00000111788 |   | -1.1 | 0.0141342 | 0.0481377 | 15.515   | 0.992  | 14.376   | 16.190   | 18.230   | 0.614   | 17.535   | 18.698   |
| 16615 | ENSG00000166503 |   | 1.1  | 0.0001039 | 0.000931  | 28.797   | 1.297  | 27.861   | 30.277   | 25.952   | 0.481   | 25.500   | 26.458   |
| 16616 | ENSG00000180574 |   | 1.1  | 0.0001909 | 0.0015369 | 147.380  | 5.280  | 142.437  | 152.943  | 132.724  | 8.207   | 123.552  | 139.372  |

|       | A               | B | C    | D         | E         | F        | G      | H        | I        | J        | K      | L        | M        |
|-------|-----------------|---|------|-----------|-----------|----------|--------|----------|----------|----------|--------|----------|----------|
| 16618 | ENSG00000213080 |   | 1.1  | 0.0045837 | 0.0197716 | 236.534  | 5.091  | 233.225  | 242.396  | 218.982  | 11.447 | 210.487  | 231.999  |
| 16619 | ENSG00000232445 |   | 1.1  | 0.0018736 | 0.0096612 | 266.340  | 12.513 | 253.928  | 278.951  | 241.364  | 14.557 | 230.051  | 257.787  |
| 16620 | ENSG00000254612 |   | 1.1  | 1.007E-05 | 0.0001343 | 549.527  | 8.664  | 540.402  | 557.640  | 489.740  | 5.992  | 483.641  | 495.619  |
| 16621 | ENSG00000269378 |   | 1.1  | 0.0035487 | 0.0161256 | 369.379  | 14.199 | 353.748  | 381.479  | 342.715  | 6.932  | 337.747  | 350.635  |
| 16622 | ENSG00000167524 |   | -1.1 | 0.0232592 | 0.0709438 | 8.270    | 0.129  | 8.137    | 8.396    | 9.707    | 0.802  | 9.198    | 10.632   |
| 16623 | ENSG00000167674 |   | -1.1 | 0.0166316 | 0.0547089 | 64.998   | 2.135  | 62.762   | 67.014   | 72.036   | 0.760  | 71.382   | 72.870   |
| 16624 | ENSG00000168824 |   | -1.1 | 0.0276148 | 0.0809022 | 13.752   | 0.299  | 13.425   | 14.011   | 15.764   | 1.713  | 14.715   | 17.741   |
| 16625 | ENSG00000172974 |   | -1.1 | 0.0146458 | 0.0495111 | 462.066  | 2.099  | 459.653  | 463.472  | 505.431  | 8.754  | 497.598  | 514.881  |
| 16626 | ENSG00000179101 |   | -1.1 | 0.0613049 | 0.1480364 | 141.879  | 5.279  | 136.095  | 146.437  | 159.396  | 6.799  | 151.558  | 163.701  |
| 16627 | ENSG00000213598 |   | -1.1 | 0.0402149 | 0.1074155 | 92.154   | 2.459  | 89.333   | 93.841   | 106.739  | 10.757 | 94.411   | 114.213  |
| 16628 | ENSG00000213862 |   | -1.1 | 0.0303373 | 0.0870093 | 318.828  | 14.417 | 303.920  | 332.699  | 353.141  | 28.548 | 329.317  | 384.784  |
| 16629 | ENSG00000213939 |   | -1.1 | 0.05527   | 0.1371763 | 184.934  | 12.741 | 176.751  | 199.614  | 209.366  | 20.347 | 186.398  | 225.133  |
| 16631 | ENSG00000214135 |   | -1.1 | 0.0140037 | 0.0477877 | 18.019   | 0.599  | 17.437   | 18.635   | 20.743   | 0.397  | 20.320   | 21.109   |
| 16632 | ENSG00000224550 |   | -1.1 | 0.0957776 | 0.2070143 | 126.268  | 7.251  | 120.637  | 134.450  | 143.811  | 13.183 | 129.914  | 156.139  |
| 16633 | ENSG00000224831 |   | -1.1 | 0.1000669 | 0.2133407 | 105.071  | 3.110  | 101.965  | 108.185  | 114.613  | 3.640  | 111.381  | 118.556  |
| 16634 | ENSG00000226210 |   | -1.1 | 0.0334345 | 0.0937464 | 24.141   | 1.860  | 22.003   | 25.382   | 27.943   | 1.363  | 26.730   | 29.419   |
| 16635 | ENSG00000226221 |   | -1.1 | 0.019556  | 0.0618873 | 1599.104 | 44.140 | 1564.683 | 1648.868 | 1746.266 | 73.313 | 1678.729 | 1824.237 |
| 16636 | ENSG00000226360 |   | -1.1 | 0.0610721 | 0.1476644 | 495.414  | 20.316 | 473.657  | 513.889  | 538.526  | 10.070 | 527.068  | 545.971  |
| 16637 | ENSG00000228305 |   | -1.1 | 0.0264159 | 0.0781344 | 89.964   | 5.133  | 84.374   | 94.464   | 103.430  | 5.701  | 99.871   | 110.005  |
| 16638 | ENSG00000230897 |   | -1.1 | 0.0202256 | 0.0636063 | 543.948  | 12.775 | 532.357  | 557.645  | 604.510  | 44.975 | 555.170  | 643.214  |
| 16639 | ENSG00000236673 |   | -1.1 | 0.1063356 | 0.2228292 | 18.004   | 3.171  | 15.379   | 21.527   | 20.799   | 1.564  | 19.293   | 22.415   |
| 16640 | ENSG00000236814 |   | -1.1 | 0.0109493 | 0.039226  | 81.975   | 1.271  | 80.521   | 82.875   | 92.697   | 0.895  | 91.788   | 93.578   |
| 16641 | ENSG00000239246 |   | -1.1 | 0.0258767 | 0.0769568 | 83.530   | 3.168  | 81.501   | 87.181   | 97.992   | 4.555  | 94.594   | 103.167  |
| 16642 | ENSG00000239665 |   | -1.1 | 0.0563335 | 0.1390295 | 2.250    | 0.164  | 2.095    | 2.422    | 2.607    | 0.238  | 2.369    | 2.846    |
| 16643 | ENSG00000240342 |   | -1.1 | 0.0311306 | 0.0888618 | 1787.216 | 24.646 | 1772.756 | 1815.674 | 1939.220 | 48.611 | 1886.069 | 1981.424 |
| 16644 | ENSG00000241556 |   | -1.1 | 0.0496653 | 0.1263903 | 54.608   | 0.738  | 53.765   | 55.140   | 63.928   | 3.210  | 61.278   | 67.498   |
| 16645 | ENSG00000250568 |   | -1.1 | 0.0405534 | 0.1081487 | 101.434  | 2.486  | 99.745   | 104.289  | 118.386  | 7.083  | 110.224  | 122.914  |
| 16646 | ENSG00000253341 |   | -1.1 | 0.0221973 | 0.068296  | 130.750  | 7.984  | 121.538  | 135.664  | 147.287  | 10.269 | 135.432  | 153.430  |
| 16647 | ENSG00000255135 |   | -1.1 | 0.0491669 | 0.1254996 | 43.424   | 3.049  | 40.338   | 46.434   | 50.537   | 2.455  | 47.708   | 52.110   |
| 16648 | ENSG00000256210 |   | -1.1 | 0.0745275 | 0.1716344 | 154.751  | 5.294  | 149.108  | 159.607  | 176.956  | 9.749  | 166.536  | 185.856  |
| 16649 | ENSG00000260822 |   | -1.1 | 0.024445  | 0.0736663 | 18.298   | 0.527  | 17.694   | 18.668   | 20.625   | 0.817  | 19.786   | 21.418   |
| 16650 | ENSG00000264350 |   | -1.1 | 0.0552744 | 0.1371763 | 234.424  | 7.768  | 225.455  | 238.995  | 266.297  | 7.667  | 257.782  | 272.653  |
| 16651 | ENSG00000267002 |   | -1.1 | 0.0147921 | 0.0498862 | 7.066    | 0.374  | 6.661    | 7.399    | 8.243    | 0.057  | 8.199    | 8.308    |
| 16652 | ENSG00000269374 |   | -1.1 | 0.0838964 | 0.1882883 | 59.652   | 4.648  | 54.876   | 64.159   | 68.211   | 9.310  | 58.241   | 76.678   |
| 16653 | ENSG00000270015 |   | -1.1 | 0.1118188 | 0.2311122 | 23.779   | 2.708  | 20.658   | 25.507   | 26.808   | 1.442  | 25.289   | 28.158   |
| 16654 | ENSG00000275131 |   | -1.1 | 0.0750185 | 0.1725303 | 3.583    | 0.170  | 3.455    | 3.776    | 4.075    | 0.119  | 3.960    | 4.198    |
| 16655 | ENSG00000275464 |   | -1.1 | 0.0325842 | 0.0920336 | 9.525    | 0.168  | 9.387    | 9.712    | 10.788   | 0.708  | 9.989    | 11.336   |
| 16657 | ENSG00000276345 |   | -1.1 | 0.1123912 | 0.2318138 | 39.209   | 2.464  | 37.450   | 42.026   | 44.448   | 1.150  | 43.232   | 45.517   |
| 16658 | ENSG00000283390 |   | -1.1 | 0.1187745 | 0.2409829 | 101.972  | 15.892 | 84.650   | 115.877  | 118.873  | 10.119 | 109.827  | 129.801  |
| 16659 | ENSG00000177822 |   | 1.2  | 0.0033972 | 0.015571  | 6.785    | 0.455  | 6.361    | 7.266    | 5.767    | 0.350  | 5.539    | 6.170    |
| 16660 | ENSG00000213846 |   | 1.2  | 6.196E-05 | 0.0006111 | 42.705   | 0.720  | 42.031   | 43.464   | 36.283   | 2.382  | 34.135   | 38.846   |
| 16661 | ENSG00000215158 |   | 1.2  | 0.0012535 | 0.0070407 | 7.483    | 0.636  | 6.779    | 8.018    | 6.143    | 0.385  | 5.704    | 6.428    |
| 16662 | ENSG00000232389 |   | 1.2  | 0.009136  | 0.0338267 | 34.868   | 2.720  | 32.417   | 37.794   | 29.684   | 4.697  | 24.635   | 33.923   |

|       | A               | B | C    | D         | E         | F       | G      | H       | I       | J       | K      | L       | M       |
|-------|-----------------|---|------|-----------|-----------|---------|--------|---------|---------|---------|--------|---------|---------|
| 16663 | ENSG00000254332 |   | 1.2  | 8.077E-05 | 0.0007585 | 140.101 | 3.959  | 136.204 | 144.119 | 120.370 | 3.797  | 116.498 | 124.088 |
| 16664 | ENSG00000261409 |   | 1.2  | 0.0002852 | 0.0021251 | 16.842  | 0.937  | 15.762  | 17.445  | 13.844  | 1.709  | 12.278  | 15.667  |
| 16665 | ENSG00000272335 |   | 1.2  | 0.004297  | 0.0187982 | 17.278  | 1.287  | 15.838  | 18.313  | 14.544  | 0.687  | 13.877  | 15.250  |
| 16666 | ENSG00000280852 |   | 1.2  | 7.871E-05 | 0.0007441 | 204.141 | 13.191 | 188.936 | 212.533 | 178.364 | 11.504 | 168.684 | 191.081 |
| 16667 | ENSG00000180015 |   | -1.2 | 0.1134665 | 0.2332634 | 13.235  | 1.572  | 12.216  | 15.045  | 15.741  | 1.184  | 14.985  | 17.105  |
| 16668 | ENSG00000213315 |   | -1.2 | 0.0921844 | 0.2016705 | 14.233  | 0.910  | 13.625  | 15.279  | 17.968  | 1.954  | 16.298  | 20.117  |
| 16669 | ENSG00000214796 |   | -1.2 | 0.0351588 | 0.0972843 | 8.731   | 0.432  | 8.391   | 9.217   | 10.315  | 1.242  | 8.971   | 11.421  |
| 16670 | ENSG00000219928 |   | -1.2 | 0.059815  | 0.1453522 | 456.364 | 24.909 | 427.621 | 471.663 | 540.692 | 81.070 | 463.495 | 625.147 |
| 16671 | ENSG00000230074 |   | -1.2 | 0.0990136 | 0.2118696 | 13.511  | 1.998  | 11.989  | 15.774  | 16.884  | 1.670  | 15.052  | 18.320  |
| 16672 | ENSG00000234028 |   | -1.2 | 0.121664  | 0.2454482 | 3.633   | 0.562  | 3.139   | 4.244   | 4.293   | 0.275  | 3.980   | 4.496   |
| 16673 | ENSG00000234327 |   | -1.2 | 0.0674368 | 0.1593628 | 7.775   | 0.753  | 6.907   | 8.249   | 9.409   | 1.762  | 7.432   | 10.815  |
| 16674 | ENSG00000235449 |   | -1.2 | 0.0100301 | 0.0365442 | 112.403 | 13.325 | 102.588 | 127.573 | 140.576 | 14.716 | 125.165 | 154.481 |
| 16675 | ENSG00000235554 |   | -1.2 | 0.118199  | 0.2403054 | 12.436  | 1.042  | 11.527  | 13.574  | 14.752  | 1.515  | 13.058  | 15.979  |
| 16676 | ENSG00000235776 |   | -1.2 | 0.0145324 | 0.049246  | 47.900  | 2.076  | 46.050  | 50.145  | 56.705  | 2.968  | 53.430  | 59.217  |
| 16677 | ENSG00000236792 |   | -1.2 | 0.1040548 | 0.219491  | 21.601  | 2.925  | 19.009  | 24.773  | 26.800  | 3.895  | 23.137  | 30.891  |
| 16678 | ENSG00000237094 |   | -1.2 | 0.0920007 | 0.2013467 | 2.186   | 0.063  | 2.143   | 2.259   | 2.647   | 0.189  | 2.430   | 2.773   |
| 16679 | ENSG00000239557 |   | -1.2 | 0.0296208 | 0.0854082 | 14.696  | 0.952  | 13.862  | 15.734  | 18.147  | 0.920  | 17.284  | 19.115  |
| 16680 | ENSG00000240291 |   | -1.2 | 0.1087138 | 0.2265775 | 6.209   | 0.998  | 5.065   | 6.905   | 7.580   | 0.968  | 6.902   | 8.689   |
| 16682 | ENSG00000241511 |   | -1.2 | 0.05479   | 0.1363135 | 36.120  | 1.853  | 33.984  | 37.308  | 43.968  | 4.665  | 39.404  | 48.727  |
| 16683 | ENSG00000242375 |   | -1.2 | 0.0293729 | 0.0848332 | 48.058  | 4.063  | 43.375  | 50.649  | 57.566  | 2.950  | 54.388  | 60.217  |
| 16684 | ENSG00000242474 |   | -1.2 | 0.1120535 | 0.2314558 | 4.251   | 0.643  | 3.511   | 4.685   | 5.363   | 1.208  | 3.985   | 6.244   |
| 16685 | ENSG00000243302 |   | -1.2 | 0.0637318 | 0.1525901 | 12.505  | 3.559  | 9.182   | 16.260  | 15.661  | 2.194  | 13.398  | 17.779  |
| 16686 | ENSG00000246130 |   | -1.2 | 0.1032945 | 0.2182457 | 3.427   | 0.190  | 3.278   | 3.641   | 4.254   | 0.519  | 3.712   | 4.747   |
| 16687 | ENSG00000248927 |   | -1.2 | 0.1241826 | 0.2492494 | 6.648   | 0.034  | 6.627   | 6.687   | 8.150   | 0.248  | 7.940   | 8.424   |
| 16688 | ENSG00000250575 |   | -1.2 | 0.0913483 | 0.2004898 | 6.482   | 0.109  | 6.410   | 6.608   | 7.980   | 0.321  | 7.690   | 8.325   |
| 16689 | ENSG00000251188 |   | -1.2 | 0.0266506 | 0.078691  | 28.461  | 1.485  | 26.862  | 29.797  | 35.628  | 3.311  | 33.555  | 39.446  |
| 16690 | ENSG00000253144 |   | -1.2 | 0.0322073 | 0.0911669 | 33.994  | 2.502  | 31.843  | 36.740  | 41.371  | 1.677  | 39.534  | 42.820  |
| 16691 | ENSG00000256673 |   | -1.2 | 0.0772545 | 0.1764968 | 33.473  | 1.130  | 32.318  | 34.576  | 40.406  | 3.222  | 37.400  | 43.808  |
| 16692 | ENSG00000257511 |   | -1.2 | 0.0107627 | 0.0386884 | 20.879  | 1.471  | 19.613  | 22.492  | 26.019  | 2.027  | 23.829  | 27.830  |
| 16693 | ENSG00000258199 |   | -1.2 | 0.0712527 | 0.166037  | 24.750  | 1.871  | 22.715  | 26.395  | 30.880  | 3.942  | 26.503  | 34.152  |
| 16694 | ENSG00000259086 |   | -1.2 | 0.0217427 | 0.0673258 | 33.786  | 3.445  | 30.046  | 36.828  | 42.210  | 2.615  | 40.315  | 45.194  |
| 16695 | ENSG00000259623 |   | -1.2 | 0.032929  | 0.0927777 | 7.163   | 0.463  | 6.702   | 7.627   | 8.733   | 1.187  | 7.844   | 10.082  |
| 16696 | ENSG00000260948 |   | -1.2 | 0.0289423 | 0.083905  | 6.539   | 0.499  | 5.965   | 6.865   | 8.305   | 1.214  | 6.909   | 9.116   |
| 16697 | ENSG00000262049 |   | -1.2 | 0.0252777 | 0.0755873 | 6.094   | 0.145  | 5.974   | 6.255   | 7.660   | 0.172  | 7.463   | 7.766   |
| 16698 | ENSG00000263535 |   | -1.2 | 0.0261211 | 0.0775198 | 41.163  | 3.917  | 38.511  | 45.662  | 48.920  | 4.189  | 45.489  | 53.588  |
| 16699 | ENSG00000263563 |   | -1.2 | 0.0963588 | 0.2077857 | 9.365   | 0.721  | 8.922   | 10.198  | 11.195  | 1.637  | 9.735   | 12.964  |
| 16700 | ENSG00000266066 |   | -1.2 | 0.0463822 | 0.1199117 | 7.231   | 0.562  | 6.621   | 7.727   | 8.534   | 0.766  | 7.833   | 9.352   |
| 16701 | ENSG00000266501 |   | -1.2 | 0.1141834 | 0.2342562 | 15.075  | 2.955  | 12.267  | 18.159  | 19.091  | 3.171  | 16.237  | 22.504  |
| 16702 | ENSG00000267055 |   | -1.2 | 0.1079098 | 0.2254234 | 23.359  | 1.373  | 22.271  | 24.901  | 27.758  | 4.035  | 23.411  | 31.385  |
| 16703 | ENSG00000268205 |   | -1.2 | 0.0189583 | 0.0604537 | 4.777   | 0.448  | 4.404   | 5.274   | 6.099   | 1.371  | 4.523   | 7.016   |
| 16704 | ENSG00000268573 |   | -1.2 | 0.0158185 | 0.0526444 | 4.092   | 0.510  | 3.572   | 4.590   | 5.221   | 0.448  | 4.747   | 5.637   |
| 16705 | ENSG00000268575 |   | -1.2 | 0.1022092 | 0.2165041 | 1.980   | 0.609  | 1.440   | 2.640   | 2.452   | 0.075  | 2.380   | 2.530   |
| 16706 | ENSG00000268858 |   | -1.2 | 0.0494059 | 0.1258884 | 4.053   | 0.416  | 3.689   | 4.506   | 5.013   | 0.775  | 4.169   | 5.694   |

|       | A               | B | C    | D         | E         | F      | G     | H      | I      | J      | K     | L      | M      |
|-------|-----------------|---|------|-----------|-----------|--------|-------|--------|--------|--------|-------|--------|--------|
| 16707 | ENSG00000268903 |   | -1.2 | 0.1094756 | 0.2276322 | 9.103  | 0.379 | 8.839  | 9.537  | 11.235 | 0.387 | 10.866 | 11.638 |
| 16708 | ENSG00000270012 |   | -1.2 | 0.0288902 | 0.0838134 | 4.692  | 0.253 | 4.408  | 4.894  | 5.945  | 0.655 | 5.530  | 6.700  |
| 16709 | ENSG00000270580 |   | -1.2 | 0.0600446 | 0.1456798 | 4.774  | 0.551 | 4.342  | 5.394  | 5.768  | 0.462 | 5.300  | 6.224  |
| 16710 | ENSG00000270704 |   | -1.2 | 0.1042694 | 0.2197319 | 29.461 | 5.197 | 25.242 | 35.267 | 36.733 | 5.285 | 32.301 | 42.582 |
| 16711 | ENSG00000271576 |   | -1.2 | 0.0422003 | 0.1113989 | 14.806 | 0.898 | 14.110 | 15.820 | 17.601 | 2.036 | 15.323 | 19.245 |
| 16712 | ENSG00000272686 |   | -1.2 | 0.0843788 | 0.1889471 | 9.875  | 1.369 | 8.517  | 11.254 | 11.664 | 1.083 | 10.416 | 12.356 |
| 16713 | ENSG00000272831 |   | -1.2 | 0.0659317 | 0.1565277 | 16.187 | 3.968 | 11.936 | 19.793 | 20.604 | 1.638 | 18.813 | 22.026 |
| 16714 | ENSG00000273373 |   | -1.2 | 0.0148116 | 0.049932  | 14.897 | 0.882 | 14.350 | 15.914 | 17.567 | 0.729 | 16.729 | 18.054 |
| 16715 | ENSG00000274712 |   | -1.2 | 0.0767225 | 0.1755183 | 8.276  | 0.737 | 7.442  | 8.843  | 9.927  | 0.897 | 9.333  | 10.960 |
| 16716 | ENSG00000278041 |   | -1.2 | 0.0176901 | 0.0572509 | 4.989  | 0.866 | 4.300  | 5.961  | 6.361  | 0.611 | 5.678  | 6.854  |
| 16717 | ENSG00000278978 |   | -1.2 | 0.0395328 | 0.1059785 | 27.239 | 2.822 | 24.265 | 29.880 | 33.033 | 1.403 | 32.012 | 34.633 |
| 16718 | ENSG00000279207 |   | -1.2 | 0.0273913 | 0.0804007 | 8.108  | 0.887 | 7.413  | 9.107  | 9.545  | 0.800 | 8.637  | 10.143 |
| 16719 | ENSG00000279495 |   | -1.2 | 0.0917644 | 0.2010639 | 4.420  | 0.769 | 3.574  | 5.077  | 5.377  | 0.555 | 4.781  | 5.878  |
| 16720 | ENSG00000223559 |   | 1.3  | 3.858E-05 | 0.0004128 | 14.468 | 0.377 | 14.181 | 14.895 | 11.198 | 0.708 | 10.384 | 11.660 |
| 16721 | ENSG00000227946 |   | 1.3  | 3.217E-05 | 0.0003538 | 65.621 | 4.440 | 60.828 | 69.594 | 52.089 | 2.002 | 50.066 | 54.069 |
| 16722 | ENSG00000231686 |   | 1.3  | 0.0066483 | 0.0264197 | 18.664 | 1.435 | 17.484 | 20.262 | 14.938 | 0.460 | 14.527 | 15.434 |
| 16723 | ENSG00000231698 |   | 1.3  | 0.0057087 | 0.0234631 | 11.256 | 1.013 | 10.402 | 12.376 | 8.643  | 0.509 | 8.071  | 9.046  |
| 16724 | ENSG00000257337 |   | 1.3  | 0.005662  | 0.0233223 | 3.003  | 0.348 | 2.716  | 3.390  | 2.361  | 0.376 | 2.073  | 2.785  |
| 16725 | ENSG00000258056 |   | 1.3  | 0.0098232 | 0.0359298 | 13.072 | 1.221 | 11.672 | 13.915 | 10.481 | 0.873 | 9.946  | 11.489 |
| 16726 | ENSG00000260719 |   | 1.3  | 0.0054864 | 0.0227042 | 15.952 | 1.375 | 14.731 | 17.441 | 12.707 | 2.821 | 10.972 | 15.961 |
| 16727 | ENSG00000264164 |   | 1.3  | 0.0013965 | 0.007641  | 58.609 | 3.612 | 54.990 | 62.214 | 47.235 | 2.955 | 44.273 | 50.183 |
| 16728 | ENSG00000283236 |   | 1.3  | 0.0054153 | 0.0224593 | 8.425  | 0.721 | 7.597  | 8.904  | 6.769  | 1.075 | 5.548  | 7.572  |
| 16729 | ENSG00000186235 |   | -1.3 | 0.0492622 | 0.125686  | 1.563  | 0.129 | 1.424  | 1.677  | 2.149  | 0.463 | 1.722  | 2.642  |
| 16730 | ENSG00000188897 |   | 1.4  | 0.0005478 | 0.0036019 | 2.057  | 0.430 | 1.562  | 2.333  | 1.510  | 0.177 | 1.362  | 1.707  |
| 16731 | ENSG00000215146 |   | 1.4  | 2.141E-06 | 3.599E-05 | 26.326 | 0.305 | 26.136 | 26.678 | 19.740 | 0.698 | 18.950 | 20.274 |
| 16732 | ENSG00000218418 |   | 1.4  | 0.0001773 | 0.0014497 | 4.257  | 0.315 | 3.943  | 4.572  | 3.163  | 0.150 | 3.059  | 3.335  |
| 16733 | ENSG00000243004 |   | 1.4  | 5.71E-07  | 1.204E-05 | 74.423 | 8.083 | 67.695 | 83.390 | 55.354 | 6.339 | 50.683 | 62.570 |
| 16734 | ENSG00000250899 |   | 1.4  | 3.434E-07 | 7.817E-06 | 23.852 | 1.756 | 21.835 | 25.042 | 17.932 | 1.313 | 16.432 | 18.871 |
| 16735 | ENSG00000275993 |   | 1.4  | 0.000328  | 0.0023705 | 4.561  | 0.745 | 3.727  | 5.160  | 3.353  | 0.081 | 3.265  | 3.425  |
| 16736 | ENSG00000276672 |   | 1.4  | 0.0023471 | 0.0115495 | 2.684  | 0.084 | 2.603  | 2.771  | 1.956  | 0.155 | 1.800  | 2.110  |
| 16737 | ENSG00000277196 |   | 1.4  | 2.228E-10 | 1.332E-08 | 93.560 | 8.088 | 84.360 | 99.548 | 68.447 | 1.235 | 67.599 | 69.864 |
| 16738 | ENSG00000278291 |   | 1.4  | 0.0032772 | 0.0151191 | 2.204  | 0.261 | 1.959  | 2.478  | 1.578  | 0.058 | 1.514  | 1.627  |
| 16739 | ENSG00000197320 |   | -1.3 | 0.0735802 | 0.1701589 | 2.540  | 0.453 | 2.034  | 2.908  | 3.351  | 0.666 | 2.916  | 4.118  |
| 16740 | ENSG00000203819 |   | -1.3 | 0.0303553 | 0.0870437 | 9.666  | 2.197 | 7.132  | 11.045 | 13.320 | 0.689 | 12.852 | 14.111 |
| 16741 | ENSG00000215014 |   | -1.3 | 0.1048624 | 0.2206679 | 1.550  | 0.545 | 1.205  | 2.178  | 2.149  | 0.504 | 1.712  | 2.701  |
| 16742 | ENSG00000217060 |   | -1.3 | 0.0863822 | 0.1922048 | 3.011  | 0.669 | 2.483  | 3.763  | 4.014  | 0.841 | 3.516  | 4.986  |
| 16744 | ENSG00000218890 |   | -1.3 | 0.0223987 | 0.0688278 | 5.557  | 0.529 | 5.037  | 6.093  | 7.385  | 0.538 | 6.770  | 7.770  |
| 16745 | ENSG00000220323 |   | -1.3 | 0.0925738 | 0.2022346 | 10.836 | 1.350 | 9.290  | 11.786 | 13.869 | 0.528 | 13.260 | 14.175 |
| 16746 | ENSG00000225205 |   | -1.3 | 0.0444253 | 0.1159033 | 3.169  | 0.594 | 2.536  | 3.714  | 4.199  | 1.165 | 3.324  | 5.521  |
| 16747 | ENSG00000226986 |   | -1.3 | 0.043869  | 0.1148362 | 12.534 | 2.983 | 10.380 | 15.938 | 16.243 | 2.253 | 13.646 | 17.684 |
| 16748 | ENSG00000227627 |   | -1.3 | 0.0168817 | 0.0553389 | 4.257  | 0.498 | 3.683  | 4.575  | 5.734  | 0.846 | 4.776  | 6.377  |
| 16749 | ENSG00000228801 |   | -1.3 | 0.1108846 | 0.2298299 | 3.101  | 0.516 | 2.802  | 3.697  | 4.005  | 1.406 | 2.680  | 5.480  |
| 16750 | ENSG00000230715 |   | -1.3 | 0.0408448 | 0.1086257 | 19.884 | 5.073 | 14.050 | 23.261 | 27.183 | 7.735 | 18.308 | 32.495 |

|       | A               | B | C    | D         | E         | F      | G     | H      | I      | J      | K     | L      | M      |
|-------|-----------------|---|------|-----------|-----------|--------|-------|--------|--------|--------|-------|--------|--------|
| 16751 | ENSG00000230922 |   | -1.3 | 0.017932  | 0.0579008 | 6.384  | 1.550 | 4.701  | 7.755  | 8.731  | 1.745 | 7.513  | 10.731 |
| 16752 | ENSG00000233834 |   | -1.3 | 0.0392443 | 0.1054057 | 14.262 | 4.403 | 10.324 | 19.016 | 18.238 | 1.891 | 16.670 | 20.339 |
| 16753 | ENSG00000234996 |   | -1.3 | 0.0210247 | 0.0656314 | 2.873  | 0.404 | 2.610  | 3.338  | 3.930  | 0.367 | 3.667  | 4.349  |
| 16754 | ENSG00000235245 |   | -1.3 | 0.1104211 | 0.2290912 | 4.183  | 1.376 | 2.594  | 4.998  | 5.772  | 0.083 | 5.706  | 5.865  |
| 16755 | ENSG00000235423 |   | -1.3 | 0.1075748 | 0.2248965 | 1.800  | 0.305 | 1.513  | 2.121  | 2.420  | 0.349 | 2.049  | 2.742  |
| 16756 | ENSG00000241764 |   | -1.3 | 0.0787983 | 0.179442  | 3.565  | 0.925 | 2.703  | 4.542  | 4.927  | 0.653 | 4.291  | 5.597  |
| 16757 | ENSG00000247363 |   | -1.3 | 0.0976223 | 0.2096084 | 1.353  | 0.370 | 1.047  | 1.764  | 1.843  | 0.440 | 1.539  | 2.347  |
| 16758 | ENSG00000247728 |   | -1.3 | 0.0974561 | 0.2093825 | 4.757  | 1.075 | 3.840  | 5.940  | 6.205  | 0.355 | 5.815  | 6.511  |
| 16759 | ENSG00000250320 |   | -1.3 | 0.0523117 | 0.1315611 | 5.297  | 0.953 | 4.526  | 6.363  | 6.856  | 0.282 | 6.578  | 7.142  |
| 16760 | ENSG00000254614 |   | -1.3 | 0.0383112 | 0.103392  | 4.218  | 0.084 | 4.125  | 4.287  | 5.499  | 0.706 | 4.752  | 6.156  |
| 16761 | ENSG00000255441 |   | -1.3 | 0.0646414 | 0.1541568 | 4.692  | 0.841 | 3.749  | 5.362  | 6.226  | 0.133 | 6.144  | 6.380  |
| 16762 | ENSG00000257086 |   | -1.3 | 0.0122536 | 0.0429522 | 11.115 | 1.554 | 9.353  | 12.289 | 15.076 | 2.520 | 12.562 | 17.602 |
| 16763 | ENSG00000257474 |   | -1.3 | 0.0311958 | 0.0889439 | 4.539  | 0.061 | 4.485  | 4.606  | 6.028  | 0.359 | 5.799  | 6.441  |
| 16764 | ENSG00000258559 |   | -1.3 | 0.0222316 | 0.0683766 | 5.962  | 1.336 | 4.428  | 6.866  | 8.226  | 1.018 | 7.612  | 9.400  |
| 16765 | ENSG00000260645 |   | -1.3 | 0.0496262 | 0.1263097 | 3.817  | 0.830 | 3.269  | 4.772  | 5.015  | 0.797 | 4.096  | 5.525  |
| 16766 | ENSG00000261578 |   | -1.3 | 0.0282324 | 0.0823836 | 2.226  | 0.482 | 1.797  | 2.747  | 2.917  | 0.414 | 2.468  | 3.283  |
| 16768 | ENSG00000261821 |   | -1.3 | 0.0321629 | 0.091148  | 1.527  | 0.263 | 1.314  | 1.821  | 2.013  | 0.186 | 1.884  | 2.227  |
| 16769 | ENSG00000262251 |   | -1.3 | 0.0877695 | 0.1943801 | 5.284  | 0.340 | 4.913  | 5.580  | 6.885  | 0.604 | 6.188  | 7.262  |
| 16770 | ENSG00000262877 |   | -1.3 | 0.0855819 | 0.1908554 | 2.714  | 0.474 | 2.171  | 3.046  | 3.694  | 0.293 | 3.412  | 3.997  |
| 16771 | ENSG00000265683 |   | -1.3 | 0.1224576 | 0.2466604 | 4.007  | 0.619 | 3.452  | 4.674  | 5.532  | 1.973 | 4.272  | 7.805  |
| 16772 | ENSG00000267787 |   | -1.3 | 0.0509716 | 0.1288999 | 2.551  | 0.621 | 1.962  | 3.199  | 3.460  | 0.369 | 3.134  | 3.860  |
| 16773 | ENSG00000268403 |   | -1.3 | 0.0359904 | 0.0988963 | 9.983  | 2.685 | 7.857  | 13.001 | 13.022 | 1.450 | 11.349 | 13.908 |
| 16774 | ENSG00000268649 |   | -1.3 | 0.0346382 | 0.0961963 | 12.137 | 2.269 | 9.694  | 14.177 | 16.217 | 2.532 | 13.767 | 18.824 |
| 16775 | ENSG00000269974 |   | -1.3 | 0.0276242 | 0.0809159 | 10.840 | 1.325 | 9.350  | 11.884 | 14.504 | 0.919 | 13.442 | 15.043 |
| 16776 | ENSG00000271966 |   | -1.3 | 0.1004945 | 0.2138749 | 5.057  | 0.401 | 4.643  | 5.442  | 6.511  | 1.135 | 5.248  | 7.448  |
| 16777 | ENSG00000272447 |   | -1.3 | 0.0478296 | 0.1227343 | 4.820  | 0.940 | 3.927  | 5.801  | 6.219  | 0.266 | 5.968  | 6.498  |
| 16778 | ENSG00000272870 |   | -1.3 | 0.0968894 | 0.2084582 | 1.266  | 0.062 | 1.194  | 1.303  | 1.749  | 0.221 | 1.494  | 1.881  |
| 16779 | ENSG00000273284 |   | -1.3 | 0.0185724 | 0.0594403 | 10.928 | 0.449 | 10.451 | 11.342 | 14.366 | 0.558 | 13.878 | 14.975 |
| 16780 | ENSG00000276248 |   | -1.3 | 0.017513  | 0.0567973 | 4.759  | 0.755 | 3.952  | 5.449  | 6.256  | 1.217 | 5.127  | 7.545  |
| 16781 | ENSG00000276524 |   | -1.3 | 0.0881796 | 0.1951048 | 5.054  | 0.948 | 3.966  | 5.698  | 6.954  | 0.419 | 6.514  | 7.348  |
| 16782 | ENSG00000278987 |   | -1.3 | 0.1097135 | 0.2280149 | 1.968  | 0.406 | 1.707  | 2.436  | 2.659  | 0.462 | 2.135  | 3.010  |
| 16783 | ENSG00000279619 |   | -1.3 | 0.0144322 | 0.0489669 | 6.725  | 1.374 | 5.914  | 8.311  | 8.936  | 0.896 | 8.240  | 9.947  |
| 16784 | ENSG00000279738 |   | -1.3 | 0.1122194 | 0.2316571 | 0.221  | 0.039 | 0.183  | 0.261  | 0.296  | 0.064 | 0.224  | 0.346  |
| 16785 | ENSG00000279878 |   | -1.3 | 0.1204562 | 0.2435289 | 4.026  | 0.487 | 3.496  | 4.454  | 5.282  | 0.630 | 4.685  | 5.941  |
| 16786 | ENSG00000280088 |   | -1.3 | 0.018128  | 0.0584108 | 5.390  | 0.319 | 5.065  | 5.704  | 7.088  | 0.904 | 6.077  | 7.820  |
| 16787 | ENSG00000283638 |   | -1.3 | 0.0329335 | 0.0927777 | 1.955  | 0.259 | 1.658  | 2.140  | 2.617  | 0.223 | 2.372  | 2.808  |
| 16788 | ENSG00000124593 |   | -1.4 | 0.0674723 | 0.1593891 | 0.771  | 0.275 | 0.599  | 1.089  | 1.096  | 0.216 | 0.873  | 1.304  |
| 16789 | ENSG00000198580 |   | 1.5  | 0.0031157 | 0.014533  | 12.511 | 0.933 | 11.443 | 13.163 | 8.310  | 2.029 | 6.487  | 10.496 |
| 16790 | ENSG00000224848 |   | 1.5  | 0.0097243 | 0.0356296 | 16.624 | 3.328 | 13.896 | 20.332 | 11.470 | 3.676 | 9.135  | 15.707 |
| 16791 | ENSG00000228592 |   | 1.5  | 7.873E-06 | 0.0001089 | 62.008 | 9.846 | 55.670 | 73.352 | 42.196 | 3.117 | 38.892 | 45.084 |
| 16792 | ENSG00000234773 |   | 1.5  | 0.0052239 | 0.0218207 | 3.223  | 0.670 | 2.633  | 3.952  | 2.234  | 0.705 | 1.488  | 2.889  |
| 16793 | ENSG00000245571 |   | 1.5  | 6.992E-05 | 0.0006746 | 9.801  | 0.858 | 8.825  | 10.438 | 6.896  | 1.293 | 5.617  | 8.202  |
| 16794 | ENSG00000250241 |   | 1.5  | 0.0058092 | 0.0238012 | 2.442  | 0.580 | 2.093  | 3.112  | 1.676  | 0.187 | 1.529  | 1.886  |

|       | A               | B | C    | D         | E         | F      | G     | H      | I      | J      | K     | L      | M      |
|-------|-----------------|---|------|-----------|-----------|--------|-------|--------|--------|--------|-------|--------|--------|
| 16795 | ENSG00000255495 |   | 1.5  | 0.0045126 | 0.0195397 | 4.220  | 0.328 | 3.952  | 4.586  | 2.789  | 0.150 | 2.685  | 2.961  |
| 16796 | ENSG00000256616 |   | 1.5  | 0.0001296 | 0.0011176 | 4.640  | 0.482 | 4.205  | 5.158  | 3.107  | 0.537 | 2.608  | 3.675  |
| 16797 | ENSG00000259969 |   | 1.5  | 0.003283  | 0.015138  | 7.447  | 0.426 | 6.986  | 7.826  | 4.994  | 0.761 | 4.145  | 5.614  |
| 16798 | ENSG00000260077 |   | 1.5  | 0.0002308 | 0.0017927 | 8.921  | 0.241 | 8.735  | 9.193  | 6.018  | 1.042 | 4.875  | 6.915  |
| 16799 | ENSG00000261211 |   | 1.5  | 0.0091455 | 0.0338538 | 2.167  | 0.320 | 1.927  | 2.531  | 1.491  | 0.434 | 1.004  | 1.834  |
| 16800 | ENSG00000271533 |   | 1.5  | 7.478E-06 | 0.0001039 | 10.034 | 0.570 | 9.380  | 10.424 | 6.804  | 1.131 | 6.069  | 8.107  |
| 16801 | ENSG00000275180 |   | 1.5  | 0.0003536 | 0.0025267 | 21.021 | 1.841 | 18.944 | 22.454 | 13.879 | 1.300 | 12.741 | 15.295 |
| 16802 | ENSG00000278730 |   | 1.5  | 5.801E-08 | 1.694E-06 | 12.986 | 0.936 | 11.962 | 13.797 | 8.611  | 0.439 | 8.170  | 9.049  |
| 16803 | ENSG00000280152 |   | 1.5  | 0.0050463 | 0.021289  | 1.972  | 0.339 | 1.663  | 2.335  | 1.333  | 0.286 | 1.027  | 1.594  |
| 16804 | ENSG00000203279 |   | -1.4 | 0.0123189 | 0.0430773 | 7.910  | 2.451 | 5.682  | 10.536 | 11.578 | 1.660 | 10.478 | 13.488 |
| 16805 | ENSG00000214776 |   | -1.4 | 0.0377404 | 0.1022956 | 0.281  | 0.072 | 0.211  | 0.355  | 0.413  | 0.035 | 0.373  | 0.435  |
| 16806 | ENSG00000226471 |   | -1.4 | 0.041839  | 0.1106353 | 2.182  | 0.222 | 1.926  | 2.312  | 3.151  | 0.441 | 2.641  | 3.406  |
| 16807 | ENSG00000227540 |   | -1.4 | 0.0410866 | 0.1091405 | 6.254  | 1.054 | 5.183  | 7.291  | 8.632  | 0.591 | 7.989  | 9.151  |
| 16808 | ENSG00000227838 |   | -1.4 | 0.0262004 | 0.0777008 | 4.884  | 0.383 | 4.510  | 5.275  | 7.051  | 1.284 | 6.302  | 8.533  |
| 16809 | ENSG00000237686 |   | -1.4 | 0.0624236 | 0.1501595 | 1.527  | 0.380 | 1.094  | 1.801  | 2.129  | 0.201 | 1.907  | 2.300  |
| 16810 | ENSG00000254910 |   | -1.4 | 0.0521032 | 0.1310952 | 11.960 | 1.934 | 10.072 | 13.936 | 16.642 | 0.170 | 16.531 | 16.837 |
| 16811 | ENSG00000256092 |   | -1.4 | 0.0748938 | 0.1723137 | 1.627  | 0.687 | 0.855  | 2.169  | 2.270  | 0.219 | 2.074  | 2.507  |
| 16812 | ENSG00000256654 |   | -1.4 | 0.0246518 | 0.0741351 | 0.481  | 0.034 | 0.459  | 0.520  | 0.705  | 0.101 | 0.595  | 0.794  |
| 16814 | ENSG00000258592 |   | -1.4 | 0.0242331 | 0.0732013 | 2.629  | 0.480 | 2.342  | 3.183  | 3.901  | 0.866 | 2.975  | 4.691  |
| 16815 | ENSG00000259924 |   | -1.4 | 0.0631851 | 0.1516245 | 3.456  | 0.383 | 3.014  | 3.678  | 4.876  | 0.874 | 3.975  | 5.719  |
| 16816 | ENSG00000260806 |   | -1.4 | 0.0746689 | 0.1719133 | 2.382  | 0.825 | 1.577  | 3.224  | 3.342  | 0.176 | 3.184  | 3.532  |
| 16817 | ENSG00000260907 |   | -1.4 | 0.0950927 | 0.2059927 | 3.113  | 0.789 | 2.394  | 3.957  | 4.403  | 1.321 | 3.477  | 5.916  |
| 16818 | ENSG00000266208 |   | -1.4 | 0.066881  | 0.1583146 | 1.155  | 0.247 | 0.917  | 1.410  | 1.700  | 0.406 | 1.270  | 2.077  |
| 16819 | ENSG00000267327 |   | -1.4 | 0.0733402 | 0.1697507 | 2.598  | 1.006 | 1.570  | 3.581  | 3.839  | 0.917 | 2.814  | 4.582  |
| 16820 | ENSG00000267939 |   | -1.4 | 0.121672  | 0.2454482 | 4.223  | 2.457 | 1.754  | 6.668  | 6.253  | 0.324 | 5.902  | 6.541  |
| 16821 | ENSG00000270108 |   | -1.4 | 0.109552  | 0.2277631 | 5.101  | 0.828 | 4.282  | 5.938  | 7.172  | 1.957 | 5.627  | 9.372  |
| 16822 | ENSG00000270441 |   | -1.4 | 0.0238546 | 0.072353  | 3.103  | 0.516 | 2.544  | 3.561  | 4.518  | 1.149 | 3.825  | 5.844  |
| 16823 | ENSG00000272221 |   | -1.4 | 0.060824  | 0.1472119 | 2.986  | 0.275 | 2.815  | 3.303  | 4.288  | 0.130 | 4.148  | 4.406  |
| 16824 | ENSG00000272758 |   | -1.4 | 0.0323497 | 0.0915087 | 1.367  | 0.316 | 1.072  | 1.701  | 1.960  | 0.269 | 1.732  | 2.256  |
| 16825 | ENSG00000272807 |   | -1.4 | 0.0422904 | 0.111602  | 4.802  | 0.782 | 4.027  | 5.590  | 7.014  | 1.983 | 5.456  | 9.246  |
| 16826 | ENSG00000272977 |   | -1.4 | 0.0437922 | 0.1146885 | 0.881  | 0.116 | 0.748  | 0.952  | 1.268  | 0.335 | 1.067  | 1.655  |
| 16827 | ENSG00000273142 |   | -1.4 | 0.0122699 | 0.0429915 | 2.109  | 0.220 | 1.948  | 2.360  | 2.988  | 0.390 | 2.573  | 3.346  |
| 16828 | ENSG00000276434 |   | -1.4 | 0.0451393 | 0.1174704 | 6.013  | 0.879 | 5.225  | 6.962  | 8.652  | 0.395 | 8.197  | 8.911  |
| 16829 | ENSG00000278238 |   | -1.4 | 0.0320145 | 0.0908492 | 7.622  | 0.370 | 7.222  | 7.952  | 11.320 | 3.026 | 8.086  | 14.082 |
| 16830 | ENSG00000278861 |   | -1.4 | 0.1132406 | 0.2330325 | 3.944  | 0.658 | 3.194  | 4.425  | 5.493  | 0.732 | 4.684  | 6.109  |
| 16831 | ENSG00000279145 |   | -1.4 | 0.0176313 | 0.0570747 | 1.112  | 0.235 | 0.889  | 1.357  | 1.580  | 0.234 | 1.334  | 1.801  |
| 16832 | ENSG00000279602 |   | -1.4 | 0.0347773 | 0.0964877 | 3.214  | 0.156 | 3.045  | 3.353  | 4.583  | 0.339 | 4.262  | 4.938  |
| 16833 | ENSG00000280046 |   | -1.4 | 0.0320795 | 0.0909726 | 0.643  | 0.078 | 0.579  | 0.730  | 0.916  | 0.133 | 0.767  | 1.022  |
| 16834 | ENSG00000217801 |   | 1.6  | 0.0047809 | 0.0204448 | 2.832  | 0.631 | 2.108  | 3.266  | 1.766  | 0.290 | 1.441  | 1.999  |
| 16835 | ENSG00000223960 |   | 1.6  | 5.008E-08 | 1.497E-06 | 8.094  | 0.737 | 7.565  | 8.936  | 5.135  | 0.303 | 4.886  | 5.473  |
| 16836 | ENSG00000233393 |   | 1.6  | 3.77E-12  | 3.521E-10 | 45.235 | 1.372 | 43.737 | 46.430 | 28.796 | 3.027 | 25.994 | 32.006 |
| 16837 | ENSG00000234614 |   | 1.6  | 0.0004003 | 0.0028004 | 21.959 | 2.113 | 19.562 | 23.555 | 14.407 | 0.949 | 13.811 | 15.501 |
| 16838 | ENSG00000242193 |   | 1.6  | 6.266E-05 | 0.0006169 | 2.693  | 0.185 | 2.508  | 2.879  | 1.741  | 0.317 | 1.384  | 1.989  |

|       | A               | B | C    | D         | E         | F       | G      | H       | I       | J      | K      | L      | M      |
|-------|-----------------|---|------|-----------|-----------|---------|--------|---------|---------|--------|--------|--------|--------|
| 16840 | ENSG00000250579 |   | 1.6  | 0.000154  | 0.0012859 | 14.606  | 0.826  | 13.793  | 15.445  | 9.570  | 0.442  | 9.084  | 9.949  |
| 16841 | ENSG00000266970 |   | 1.6  | 0.0003023 | 0.0022231 | 9.351   | 1.065  | 8.208   | 10.315  | 6.104  | 0.045  | 6.056  | 6.144  |
| 16842 | ENSG00000279267 |   | 1.6  | 0.0070717 | 0.0277373 | 2.457   | 0.659  | 1.697   | 2.870   | 1.528  | 0.364  | 1.111  | 1.782  |
| 16843 | ENSG00000279673 |   | 1.6  | 0.0062171 | 0.0250416 | 4.679   | 1.784  | 3.503   | 6.732   | 3.068  | 0.562  | 2.472  | 3.587  |
| 16844 | ENSG00000279882 |   | 1.6  | 0.0009163 | 0.0054322 | 25.341  | 4.049  | 22.248  | 29.923  | 16.569 | 1.887  | 15.326 | 18.741 |
| 16845 | ENSG00000280594 |   | 1.6  | 0.0075691 | 0.0292945 | 1.934   | 0.345  | 1.604   | 2.292   | 1.259  | 0.104  | 1.153  | 1.359  |
| 16846 | ENSG00000200090 |   | -1.5 | 0.028614  | 0.0832243 | 31.427  | 6.565  | 23.877  | 35.793  | 47.292 | 2.845  | 45.492 | 50.572 |
| 16847 | ENSG00000224592 |   | -1.5 | 0.0158768 | 0.0528175 | 5.705   | 1.113  | 4.536   | 6.752   | 8.520  | 0.988  | 7.564  | 9.536  |
| 16848 | ENSG00000231416 |   | -1.5 | 0.0869499 | 0.1930661 | 6.383   | 1.720  | 4.715   | 8.151   | 9.885  | 2.500  | 8.116  | 12.745 |
| 16850 | ENSG00000235225 |   | -1.5 | 0.0459313 | 0.1190371 | 6.199   | 0.715  | 5.374   | 6.649   | 9.601  | 1.897  | 7.428  | 10.927 |
| 16851 | ENSG00000240890 |   | -1.5 | 0.0388496 | 0.104528  | 1.186   | 0.028  | 1.160   | 1.216   | 1.785  | 0.190  | 1.590  | 1.968  |
| 16852 | ENSG00000250328 |   | -1.5 | 0.0179996 | 0.0580968 | 1.410   | 0.266  | 1.153   | 1.684   | 2.184  | 0.513  | 1.672  | 2.697  |
| 16853 | ENSG00000251432 |   | -1.5 | 0.0237183 | 0.0720065 | 1.097   | 0.316  | 0.817   | 1.439   | 1.639  | 0.168  | 1.514  | 1.830  |
| 16854 | ENSG00000251580 |   | -1.5 | 0.0109848 | 0.0393198 | 8.194   | 1.688  | 6.298   | 9.532   | 12.805 | 2.296  | 11.469 | 15.456 |
| 16855 | ENSG00000254419 |   | -1.5 | 0.0648636 | 0.1545341 | 3.855   | 1.303  | 2.559   | 5.164   | 5.887  | 1.545  | 4.576  | 7.590  |
| 16856 | ENSG00000256443 |   | -1.5 | 0.0500286 | 0.1269906 | 1.214   | 0.168  | 1.048   | 1.383   | 1.833  | 0.241  | 1.623  | 2.096  |
| 16857 | ENSG00000197813 |   | 1.7  | 0.0017213 | 0.0090582 | 8.831   | 0.261  | 8.643   | 9.129   | 5.177  | 0.584  | 4.798  | 5.849  |
| 16858 | ENSG00000213062 |   | 1.7  | 0.0012113 | 0.0068551 | 6.775   | 0.222  | 6.645   | 7.032   | 4.009  | 1.268  | 3.090  | 5.455  |
| 16859 | ENSG00000250508 |   | 1.7  | 0.004746  | 0.0203211 | 1.539   | 0.433  | 1.044   | 1.848   | 0.923  | 0.267  | 0.721  | 1.226  |
| 16860 | ENSG00000268201 |   | -1.5 | 0.0512761 | 0.1294031 | 5.475   | 0.853  | 4.835   | 6.443   | 8.146  | 1.950  | 6.777  | 10.379 |
| 16861 | ENSG00000251602 |   | 1.7  | 0.0090001 | 0.0334251 | 1.733   | 0.101  | 1.621   | 1.814   | 1.051  | 0.322  | 0.686  | 1.295  |
| 16862 | ENSG00000271971 |   | -1.5 | 0.0103165 | 0.0374077 | 6.436   | 2.418  | 5.018   | 9.228   | 10.071 | 1.496  | 9.073  | 11.791 |
| 16863 | ENSG00000272764 |   | -1.5 | 0.0656093 | 0.1558716 | 7.687   | 1.608  | 5.938   | 9.100   | 11.560 | 0.463  | 11.254 | 12.093 |
| 16864 | ENSG00000273149 |   | -1.5 | 0.0275316 | 0.0806726 | 15.442  | 3.294  | 12.669  | 19.083  | 23.638 | 8.004  | 17.597 | 32.716 |
| 16865 | ENSG00000273311 |   | -1.5 | 0.0224699 | 0.069009  | 1.539   | 0.267  | 1.267   | 1.802   | 2.384  | 0.734  | 1.543  | 2.896  |
| 16866 | ENSG00000254258 |   | 1.7  | 0.0031706 | 0.0147399 | 4.257   | 0.601  | 3.592   | 4.763   | 2.525  | 0.153  | 2.401  | 2.696  |
| 16867 | ENSG00000279427 |   | -1.5 | 0.0328922 | 0.0927187 | 3.444   | 1.170  | 2.100   | 4.239   | 5.462  | 0.826  | 4.894  | 6.410  |
| 16868 | ENSG00000279861 |   | -1.5 | 0.0244309 | 0.0736542 | 1.574   | 0.072  | 1.504   | 1.649   | 2.462  | 0.260  | 2.244  | 2.749  |
| 16869 | ENSG00000272419 |   | 1.7  | 0.0003818 | 0.0026917 | 1.263   | 0.155  | 1.111   | 1.420   | 0.777  | 0.106  | 0.657  | 0.858  |
| 16870 | ENSG00000279312 |   | 1.7  | 0.0007585 | 0.0046597 | 3.144   | 0.344  | 2.861   | 3.527   | 1.867  | 0.225  | 1.612  | 2.037  |
| 16871 | ENSG00000284294 |   | 1.7  | 5.8E-09   | 2.33E-07  | 79.298  | 12.315 | 66.182  | 90.615  | 46.955 | 1.215  | 45.997 | 48.322 |
| 16872 | ENSG00000225850 |   | -1.6 | 0.0363685 | 0.099676  | 2.574   | 0.726  | 1.851   | 3.303   | 4.186  | 1.525  | 2.488  | 5.440  |
| 16873 | ENSG00000231663 |   | -1.6 | 0.0154717 | 0.0516834 | 4.981   | 1.044  | 3.852   | 5.910   | 8.100  | 1.575  | 6.675  | 9.792  |
| 16874 | ENSG00000248583 |   | -1.6 | 0.0493669 | 0.1258202 | 2.961   | 0.629  | 2.239   | 3.391   | 4.718  | 0.733  | 3.931  | 5.380  |
| 16875 | ENSG00000255306 |   | -1.6 | 0.0150832 | 0.0506557 | 3.609   | 0.702  | 2.799   | 4.032   | 5.815  | 1.463  | 4.444  | 7.355  |
| 16876 | ENSG00000258727 |   | -1.6 | 0.0197244 | 0.0623082 | 0.792   | 0.143  | 0.637   | 0.919   | 1.263  | 0.071  | 1.197  | 1.338  |
| 16877 | ENSG00000263818 |   | -1.6 | 0.0248552 | 0.0746805 | 0.521   | 0.087  | 0.429   | 0.602   | 0.839  | 0.070  | 0.760  | 0.894  |
| 16878 | ENSG00000224789 |   | 1.8  | 0.0054523 | 0.0225853 | 6.528   | 1.207  | 5.135   | 7.255   | 3.762  | 1.037  | 2.612  | 4.624  |
| 16879 | ENSG00000250993 |   | 1.8  | 0.0015459 | 0.0083025 | 8.331   | 1.646  | 6.910   | 10.135  | 4.741  | 0.616  | 4.062  | 5.264  |
| 16880 | ENSG00000253507 |   | 1.8  | 4.01E-12  | 3.662E-10 | 78.159  | 10.001 | 70.830  | 89.552  | 44.402 | 2.252  | 41.881 | 46.216 |
| 16881 | ENSG00000255666 |   | 1.8  | 0.0020104 | 0.0102016 | 135.283 | 37.410 | 110.836 | 178.349 | 78.196 | 10.706 | 66.190 | 86.752 |
| 16882 | ENSG00000273796 |   | -1.6 | 0.0438242 | 0.1147367 | 3.429   | 1.042  | 2.390   | 4.474   | 5.722  | 1.647  | 4.152  | 7.437  |
| 16883 | ENSG00000257043 |   | 1.8  | 0.0004244 | 0.0029282 | 14.253  | 2.293  | 11.695  | 16.123  | 7.862  | 2.624  | 4.849  | 9.648  |



|       | A               | B | C    | D         | E         | F      | G     | H      | I      | J      | K     | L     | M      |
|-------|-----------------|---|------|-----------|-----------|--------|-------|--------|--------|--------|-------|-------|--------|
| 16884 | ENSG00000267102 |   | 1.8  | 0.003038  | 0.0022324 | 12.284 | 0.378 | 12.017 | 12.716 | 7.175  | 2.576 | 4.458 | 9.582  |
| 16885 | ENSG00000267745 |   | 1.8  | 0.0039402 | 0.0175695 | 3.628  | 0.693 | 3.167  | 4.425  | 2.106  | 0.084 | 2.050 | 2.203  |
| 16886 | ENSG00000260593 |   | 1.9  | 0.0047062 | 0.0201816 | 7.429  | 1.610 | 6.088  | 9.214  | 3.997  | 0.045 | 3.948 | 4.036  |
| 16887 | ENSG00000272669 |   | 1.9  | 0.0068103 | 0.0268743 | 6.936  | 1.295 | 6.069  | 8.425  | 3.828  | 1.934 | 1.911 | 5.778  |
| 16888 | ENSG00000272931 |   | 1.9  | 0.0059716 | 0.0242969 | 5.331  | 1.866 | 3.187  | 6.590  | 2.839  | 0.559 | 2.250 | 3.362  |
| 16889 | ENSG00000272054 |   | -1.7 | 0.0393746 | 0.1056716 | 0.468  | 0.220 | 0.272  | 0.705  | 0.830  | 0.401 | 0.368 | 1.069  |
| 16890 | ENSG00000283877 |   | -1.8 | 0.0127255 | 0.0442142 | 5.596  | 0.994 | 4.608  | 6.596  | 10.314 | 3.497 | 8.005 | 14.337 |
| 16891 | ENSG00000257497 |   | -3.2 | 1.565E-06 | 2.754E-05 | 1.100  | 0.265 | 0.798  | 1.295  | 3.678  | 1.370 | 2.096 | 4.504  |
| 16892 | ENSG00000274627 |   | -2.6 | 0.000139  | 0.0011793 | 0.237  | 0.087 | 0.137  | 0.300  | 0.630  | 0.112 | 0.516 | 0.739  |
| 16893 | ENSG00000228613 |   | -2.3 | 9.477E-05 | 0.0008654 | 3.273  | 2.035 | 1.504  | 5.497  | 7.593  | 1.173 | 6.367 | 8.705  |
| 16894 | ENSG00000228863 |   | -2.3 | 0.0006857 | 0.0043047 | 0.358  | 0.075 | 0.276  | 0.424  | 0.832  | 0.085 | 0.782 | 0.929  |
| 16895 | ENSG00000234779 |   | -2.2 | 0.0014067 | 0.007687  | 3.693  | 2.114 | 1.380  | 5.523  | 8.173  | 0.839 | 7.409 | 9.071  |
| 16896 | ENSG00000279744 |   | -2.2 | 0.000468  | 0.0031687 | 1.223  | 0.271 | 0.982  | 1.517  | 2.724  | 0.265 | 2.521 | 3.024  |
| 16897 | ENSG00000279765 |   | -2.1 | 0.0004734 | 0.0032001 | 0.532  | 0.106 | 0.409  | 0.593  | 1.128  | 0.245 | 0.886 | 1.375  |
| 16898 | ENSG00000280129 |   | -2.1 | 0.0017717 | 0.0092428 | 1.156  | 0.465 | 0.727  | 1.650  | 2.475  | 0.374 | 2.054 | 2.771  |
| 16899 | ENSG00000256542 |   | -2   | 0.002307  | 0.0113789 | 0.649  | 0.291 | 0.343  | 0.923  | 1.311  | 0.175 | 1.132 | 1.482  |
| 16900 | ENSG00000261104 |   | -2   | 0.0002001 | 0.001598  | 0.769  | 0.162 | 0.632  | 0.948  | 1.615  | 0.323 | 1.423 | 1.989  |
| 16901 | ENSG00000203392 |   | 2    | 0.0018786 | 0.0096841 | 1.992  | 0.160 | 1.824  | 2.143  | 1.022  | 0.583 | 0.454 | 1.620  |
| 16902 | ENSG00000261655 |   | 2    | 7.281E-06 | 0.0001016 | 4.252  | 0.491 | 3.685  | 4.554  | 2.164  | 0.046 | 2.125 | 2.215  |
| 16903 | ENSG00000230039 |   | 2.1  | 0.0015519 | 0.0083218 | 3.377  | 0.996 | 2.301  | 4.267  | 1.635  | 0.265 | 1.415 | 1.929  |
| 16904 | ENSG00000254602 |   | 2.1  | 5.75E-11  | 3.968E-09 | 13.234 | 0.684 | 12.758 | 14.018 | 6.555  | 1.334 | 5.748 | 8.095  |
| 16905 | ENSG00000273489 |   | 2.1  | 0.0004045 | 0.0028141 | 1.547  | 0.475 | 1.038  | 1.980  | 0.753  | 0.147 | 0.666 | 0.922  |
| 16906 | ENSG00000282024 |   | 2.1  | 0.001616  | 0.0086054 | 6.981  | 2.874 | 5.042  | 10.284 | 3.446  | 1.234 | 2.472 | 4.833  |
| 16907 | ENSG00000251615 |   | 2.3  | 0.0005903 | 0.0038309 | 1.094  | 0.178 | 0.917  | 1.273  | 0.488  | 0.113 | 0.360 | 0.574  |
| 16908 | ENSG00000253348 |   | 2.3  | 6.084E-07 | 1.267E-05 | 13.874 | 2.907 | 12.175 | 17.231 | 6.147  | 1.296 | 4.672 | 7.100  |
| 16910 | ENSG00000230650 |   | 2.5  | 2.118E-05 | 0.0002494 | 1.953  | 0.522 | 1.627  | 2.555  | 0.798  | 0.285 | 0.471 | 0.991  |
| 16911 | ENSG00000224163 |   | 2.7  | 0.0020707 | 0.0104321 | 3.428  | 0.767 | 2.855  | 4.299  | 1.267  | 0.179 | 1.076 | 1.430  |
| 16912 | ENSG00000260196 |   | 3.1  | 7.864E-07 | 1.561E-05 | 1.816  | 0.323 | 1.536  | 2.170  | 0.588  | 0.196 | 0.434 | 0.808  |
| 16913 | ENSG00000206532 |   | 3.3  | 1.09E-11  | 9.141E-10 | 10.650 | 0.506 | 10.081 | 11.049 | 3.342  | 1.137 | 2.621 | 4.653  |
| 16914 | ENSG00000280143 |   | 4    | 1.71E-16  | 4.75E-14  | 8.271  | 1.029 | 7.427  | 9.418  | 2.106  | 0.439 | 1.764 | 2.601  |
| 16915 | ENSG00000275216 |   | 4.1  | 7.32E-14  | 1.08E-11  | 4.394  | 0.474 | 4.059  | 4.937  | 1.088  | 0.222 | 0.842 | 1.274  |

|    | A                                          | B      | C         | D           | E           |
|----|--------------------------------------------|--------|-----------|-------------|-------------|
| 1  | Hallmark Gene Set                          | Number | Direction | P Value     | FDR         |
| 2  | HALLMARK_CHOLESTEROL_HOMEOSTASIS           | 70     | Up        | 5.61E-37    | 2.81E-35    |
| 3  | HALLMARK_MTORC1_SIGNALING                  | 195    | Up        | 2.28E-17    | 5.71E-16    |
| 4  | HALLMARK_ANDROGEN_RESPONSE                 | 93     | Up        | 1.04364E-09 | 1.73939E-08 |
| 5  | HALLMARK_TNFA_SIGNALING_VIA_NFKB           | 166    | Up        | 6.82398E-07 | 8.52997E-06 |
| 6  | HALLMARK_COMPLEMENT                        | 143    | Up        | 6.3818E-06  | 5.31817E-05 |
| 7  | HALLMARK_COAGULATION                       | 83     | Up        | 6.09935E-06 | 5.31817E-05 |
| 8  | HALLMARK_EPITHELIAL_MESENCHYMAL_TRANSITION | 167    | Up        | 6.46274E-05 | 0.000461624 |
| 9  | HALLMARK_FATTY_ACID_METABOLISM             | 131    | Up        | 0.000106798 | 0.00066749  |
| 10 | HALLMARK_XENOBIOTIC_METABOLISM             | 139    | Up        | 0.000160687 | 0.000892706 |
| 11 | HALLMARK_IL6_JAK_STAT3_SIGNALING           | 55     | Up        | 0.000309534 | 0.001547672 |
| 12 | HALLMARK_UNFOLDED_PROTEIN_RESPONSE         | 112    | Up        | 0.000552341 | 0.002354975 |
| 13 | HALLMARK_BILE_ACID_METABOLISM              | 82     | Up        | 0.000565194 | 0.002354975 |
| 14 | HALLMARK_HYPOXIA                           | 178    | Up        | 0.000891192 | 0.003155161 |
| 15 | HALLMARK_MYOGENESIS                        | 156    | Up        | 0.000946548 | 0.003155161 |
| 16 | HALLMARK_APOPTOSIS                         | 136    | Up        | 0.000829396 | 0.003155161 |
| 17 | HALLMARK_IL2_STAT5_SIGNALING               | 159    | Up        | 0.001071152 | 0.003347351 |
| 18 | HALLMARK_E2F_TARGETS                       | 198    | Down      | 0.002017284 | 0.005933188 |
| 19 | HALLMARK_UV_RESPONSE_DN                    | 138    | Up        | 0.002682622 | 0.007451728 |
| 20 | HALLMARK_INFLAMMATORY_RESPONSE             | 125    | Up        | 0.003912906 | 0.010297122 |
| 21 | HALLMARK_REACTIVE_OXIGEN_SPECIES_PATHWAY   | 47     | Up        | 0.004890471 | 0.012226179 |
| 22 | HALLMARK_G2M_CHECKPOINT                    | 195    | Down      | 0.007188974 | 0.017116605 |
| 23 | HALLMARK_PI3K_AKT_MTOR_SIGNALING           | 96     | Up        | 0.015599511 | 0.035453435 |
| 24 | HALLMARK_ESTROGEN_RESPONSE_EARLY           | 181    | Up        | 0.018371222 | 0.038273378 |
| 25 | HALLMARK_INTERFERON_GAMMA_RESPONSE         | 143    | Up        | 0.017912376 | 0.038273378 |
| 26 | HALLMARK_PANCREAS_BETA_CELLS               | 23     | Down      | 0.019907628 | 0.039815256 |
| 27 | HALLMARK_MITOTIC_SPINDLE                   | 200    | Down      | 0.029684065 | 0.057084741 |
| 28 | HALLMARK_MYC_TARGETS_V1                    | 200    | Down      | 0.032555803 | 0.060288524 |
| 29 | HALLMARK_TGF_BETA_SIGNALING                | 54     | Up        | 0.033777352 | 0.060316699 |

|    | A                                   | B   | C    | D           | E           |
|----|-------------------------------------|-----|------|-------------|-------------|
| 30 | HALLMARK_APICAL_SURFACE             | 34  | Up   | 0.038153759 | 0.065782343 |
| 31 | HALLMARK_ANGIOGENESIS               | 25  | Up   | 0.042163772 | 0.070272953 |
| 32 | HALLMARK_ESTROGEN_RESPONSE_LATE     | 170 | Up   | 0.043889738 | 0.0707899   |
| 33 | HALLMARK_HEME_METABOLISM            | 169 | Up   | 0.052323591 | 0.081755611 |
| 34 | HALLMARK_ADIPOGENESIS               | 181 | Up   | 0.059267225 | 0.089798826 |
| 35 | HALLMARK_PEROXISOME                 | 93  | Up   | 0.063768144 | 0.093776683 |
| 36 | HALLMARK_INTERFERON_ALPHA_RESPONSE  | 72  | Up   | 0.102270636 | 0.146100908 |
| 37 | HALLMARK_P53_PATHWAY                | 183 | Up   | 0.109174653 | 0.151631463 |
| 38 | HALLMARK_APICAL_JUNCTION            | 175 | Up   | 0.155143859 | 0.209653864 |
| 39 | HALLMARK_HEDGEHOG_SIGNALING         | 33  | Up   | 0.16048218  | 0.211160763 |
| 40 | HALLMARK_DNA_REPAIR                 | 147 | Down | 0.193044873 | 0.241306091 |
| 41 | HALLMARK_WNT_BETA_CATENIN_SIGNALING | 38  | Down | 0.192257379 | 0.241306091 |

|    | A                                                            | B                   | C                      | D                  | E                  |
|----|--------------------------------------------------------------|---------------------|------------------------|--------------------|--------------------|
| 1  | <b>C2 Gene Set</b>                                           | <b>Number of Ge</b> | <b>Direction of ch</b> | <b>P Value</b>     | <b>FDR</b>         |
| 2  | HORTON_SREBF_TARGETS                                         | 25                  | Up                     | 6.38E-61           | 3.01E-57           |
| 3  | SCHMIDT_POR_TARGETS_IN_LIMB_BUD_UP                           | 24                  | Up                     | 5.20E-59           | 1.23E-55           |
| 4  | REACTOME_CHOLESTEROL_BIOSYNTHESIS                            | 21                  | Up                     | 7.2355E-58         | 1.13959E-54        |
| 5  | KRIGE_AMINO_ACID_DEPRIVATION                                 | 26                  | Up                     | 1.57613E-48        | 1.86181E-45        |
| 6  | PACHER_TARGETS_OF_IGF1_AND_IGF2_UP                           | 30                  | Up                     | 1.02022E-38        | 9.64104E-36        |
| 7  | WENG_POR_TARGETS_GLOBAL_UP                                   | 14                  | Up                     | 3.85223E-37        | 3.03363E-34        |
| 8  | <b>KEGG_STEROID_BIOSYNTHESIS</b>                             | <b>16</b>           | <b>Up</b>              | <b>9.96121E-32</b> | <b>6.72382E-29</b> |
| 9  | WENG_POR_TARGETS_LIVER_UP                                    | 33                  | Up                     | 4.11197E-28        | 2.42863E-25        |
| 10 | KEGG_TERPENOID_BACKBONE_BIOSYNTHESIS                         | 13                  | Up                     | 1.14774E-25        | 6.02563E-23        |
| 11 | ZHAN_MULTIPLE_MYELOMA_CD1_VS_CD2_UP                          | 54                  | Up                     | 1.73716E-22        | 8.20808E-20        |
| 12 | GARGALOVIC_RESPONSE_TO_OXIDIZED_PHOSPH<br>OLIPIDS_RED_UP     | 16                  | Up                     | 6.83672E-22        | 2.93668E-19        |
| 13 | HELLER_SILENCED_BY_METHYLATION_DN                            | 89                  | Up                     | 1.96866E-19        | 7.75161E-17        |
| 14 | KOBAYASHI_EGFR_SIGNALING_6HR_DN                              | 17                  | Up                     | 4.04494E-18        | 1.47018E-15        |
| 15 | PODAR_RESPONSE_TO_ADAPHOSTIN_UP                              | 129                 | Up                     | 1.46992E-17        | 4.96097E-15        |
| 16 | BURTON_ADIPOGENESIS_10                                       | 28                  | Up                     | 1.81458E-17        | 5.71594E-15        |
| 17 | ZHAN_MULTIPLE_MYELOMA_CD1_UP                                 | 38                  | Up                     | 2.38352E-16        | 6.8334E-14         |
| 18 | LE_EGR2_TARGETS_DN                                           | 89                  | Up                     | 2.45858E-16        | 6.8334E-14         |
| 19 | GROSS_HYPOXIA_VIA_ELK3_ONLY_UP                               | 27                  | Up                     | 3.10059E-16        | 8.13904E-14        |
| 20 | SHAFFER_IRF4_TARGETS_IN_ACTIVATED_B_LYM<br>PHOCYTE           | 79                  | Up                     | 3.0693E-15         | 7.63285E-13        |
| 21 | REACTOME_AMINO_ACID_TRANSPORT_ACROSS_<br>THE_PLASMA_MEMBRANE | 23                  | Up                     | 3.9533E-15         | 9.33966E-13        |
| 22 | PEDERSEN_METASTASIS_BY_ERBB2_ISOFORM_1                       | 39                  | Up                     | 1.93767E-14        | 4.35976E-12        |
| 23 | KIM_WT1_TARGETS_UP                                           | 197                 | Up                     | 2.88037E-13        | 6.18625E-11        |
| 24 | PODAR_RESPONSE_TO_ADAPHOSTIN_DN                              | 16                  | Up                     | 8.843E-13          | 1.81666E-10        |
| 25 | BURTON_ADIPOGENESIS_PEAK_AT_24HR                             | 36                  | Down                   | 1.41298E-12        | 2.78181E-10        |
| 26 | SARTIPY_NORMAL_AT_INSULIN_RESISTANCE_UP                      | 32                  | Up                     | 2.95247E-12        | 5.58016E-10        |
| 27 | SUH_COEXPRESSED_WITH_ID1_AND_ID2_UP                          | 18                  | Up                     | 3.40899E-12        | 6.19518E-10        |

|    | A                                                         | B         | C           | D                  | E                  |
|----|-----------------------------------------------------------|-----------|-------------|--------------------|--------------------|
| 28 | GAUSSMANN_MLL_AF4_FUSION_TARGETS_C_D<br>N                 | 14        | Up          | 4.69467E-12        | 8.21568E-10        |
| 29 | HUANG_FOXA2_TARGETS_UP                                    | 42        | Up          | 5.05269E-12        | 8.52642E-10        |
| 30 | MAHADEVAN_RESPONSE_TO_MP470_DN                            | 18        | Up          | 5.81905E-12        | 9.48104E-10        |
| 31 | AMUNDSON_GAMMA_RADIATION_RESPONSE                         | 37        | Down        | 1.31841E-11        | 2.07649E-09        |
| 32 | NAGASHIMA_NRG1_SIGNALING_UP                               | 161       | Up          | 1.45397E-11        | 2.21614E-09        |
| 33 | PASINI_SUZ12_TARGETS_DN                                   | 299       | Up          | 1.66546E-11        | 2.45915E-09        |
| 34 | REACTOME_RESPONSE_TO_ELEVATED_PLATELET<br>_CYTOSOLIC_CA2_ | 54        | Up          | 3.00854E-11        | 4.30769E-09        |
| 35 | RAMJAUN_APOPTOSIS_BY_TGFB1_VIA_MAPK1_D<br>N               | 8         | Up          | 3.92998E-11        | 5.46152E-09        |
| 36 | AMIT_EGF_RESPONSE_60_MCF10A                               | 32        | Up          | 5.64231E-11        | 7.61712E-09        |
| 37 | KAN_RESPONSE_TO_ARSENIC_TRIOXIDE                          | 104       | Up          | 6.34126E-11        | 8.32291E-09        |
| 38 | PRAMOONJAGO_SOX4_TARGETS_UP                               | 51        | Up          | 7.1317E-11         | 9.10737E-09        |
| 39 | GUO_TARGETS_OF_IRS1_AND_IRS2                              | 88        | Up          | 1.48055E-10        | 1.84095E-08        |
| 40 | NAGASHIMA_EGF_SIGNALING_UP                                | 53        | Up          | 1.70202E-10        | 2.06206E-08        |
| 41 | ZWANG_EGF_PERSISTENTLY_UP                                 | 27        | Up          | 2.58677E-10        | 3.05563E-08        |
| 42 | <b>FARMER_BREAST_CANCER_CLUSTER_2</b>                     | <b>33</b> | <b>Down</b> | <b>2.6826E-10</b>  | <b>3.09154E-08</b> |
| 43 | GROSS_HYPOXIA_VIA_ELK3_DN                                 | 129       | Up          | 3.04E-10           | 3.42E-08           |
| 44 | OXFORD_RALA_TARGETS_UP                                    | 7         | Up          | 4.70E-10           | 5.17E-08           |
| 45 | FINETTI_BREAST_CANCER_KINOME_RED                          | 16        | Down        | 4.98603E-10        | 5.32838E-08        |
| 46 | TOOKER_GEMCITABINE_RESISTANCE_DN                          | 119       | Up          | 5.07465E-10        | 5.32838E-08        |
| 47 | PID_AURORA_B_PATHWAY                                      | 38        | Down        | 6.08431E-10        | 6.24964E-08        |
| 48 | IGARASHI_ATF4_TARGETS_DN                                  | 79        | Up          | 6.24627E-10        | 6.27949E-08        |
| 49 | <b>PEDERSEN_METASTASIS_BY_ERBB2_ISOFORM_5</b>             | <b>10</b> | <b>Up</b>   | <b>6.51367E-10</b> | <b>6.41189E-08</b> |
| 50 | REACTOME_AMINO_ACID_AND_OLIGOPEPTIDE_S<br>LC_TRANSPORTERS | 36        | Up          | 6.92076E-10        | 6.67359E-08        |
| 51 | AMIT_EGF_RESPONSE_240_MCF10A                              | 19        | Up          | 9.39273E-10        | 8.87613E-08        |
| 52 | CHEN_LVAD_SUPPORT_OF_FAILING_HEART_UP                     | 88        | Up          | 1.23144E-09        | 1.14089E-07        |
| 53 | VISALA_AGING_LYMPHOCYTE_DN                                | 14        | Up          | 1.27831E-09        | 1.16154E-07        |
| 54 | GERY_CEBP_TARGETS                                         | 97        | Up          | 1.36362E-09        | 1.21568E-07        |

|    | A                                                     | B   | C    | D           | E           |
|----|-------------------------------------------------------|-----|------|-------------|-------------|
| 55 | NOJIMA_SFRP2_TARGETS_UP                               | 25  | Up   | 1.71756E-09 | 1.50286E-07 |
| 56 | LINDSTEDT_DENDRITIC_CELL_MATURATION_A                 | 38  | Up   | 1.9225E-09  | 1.6516E-07  |
| 57 | CHO_NR4A1_TARGETS                                     | 24  | Up   | 2.54016E-09 | 2.14326E-07 |
| 58 | REACTOME_FATTY_ACYL_COA_BIOSYNTHESIS                  | 16  | Up   | 3.23789E-09 | 2.6579E-07  |
| 59 | SMIRNOV_CIRCULATING_ENDOTHELIOCYTES_IN_CANCER_UP      | 124 | Up   | 3.26261E-09 | 2.6579E-07  |
| 60 | DIRMEIER_LMP1_RESPONSE_LATE_UP                        | 51  | Up   | 3.49431E-09 | 2.79841E-07 |
| 61 | WILCOX_RESPONSE_TO_PROGESTERONE_UP                    | 125 | Up   | 5.33594E-09 | 4.20205E-07 |
| 62 | TERAMOTO_OPN_TARGETS_CLUSTER_7                        | 16  | Up   | 6.73056E-09 | 5.21342E-07 |
| 63 | KRIEG_HYPOXIA_VIA_KDM3A                               | 44  | Up   | 7.3258E-09  | 5.58297E-07 |
| 64 | KEGG_BIOSYNTHESIS_OF_UNSATURATED_FATTY_ACIDS          | 21  | Up   | 8.15427E-09 | 6.11571E-07 |
| 65 | KEGG_BUTANOATE_METABOLISM                             | 25  | Up   | 1.00141E-08 | 7.39324E-07 |
| 66 | BRUNO_HEMATOPOIESIS                                   | 53  | Up   | 1.01711E-08 | 7.39361E-07 |
| 67 | HELLER_HDAC_TARGETS_SILENCED_BY_METHYLATION_DN        | 226 | Up   | 1.58445E-08 | 1.13432E-06 |
| 68 | GAJATE_RESPONSE_TO TRABECTEDIN_UP                     | 52  | Up   | 1.65326E-08 | 1.16592E-06 |
| 69 | ADDYA_ERYTHROID_DIFFERENTIATION_BY_HEMIN              | 64  | Up   | 1.83301E-08 | 1.27368E-06 |
| 70 | DAUER_STAT3_TARGETS_UP                                | 42  | Up   | 2.11706E-08 | 1.44972E-06 |
| 71 | JISON_SICKLE_CELL_DISEASE_UP                          | 148 | Up   | 2.46797E-08 | 1.66588E-06 |
| 72 | CONCANNON_APOPTOSIS_BY_EPOXOMICIN_UP                  | 224 | Up   | 2.74213E-08 | 1.82487E-06 |
| 73 | KONG_E2F3_TARGETS                                     | 89  | Down | 3.16238E-08 | 2.07531E-06 |
| 74 | PENG_GLUCOSE_DEPRIVATION_UP                           | 41  | Up   | 3.74929E-08 | 2.42677E-06 |
| 75 | PLASARI_TGFB1_SIGNALING_VIA_NFIC_1HR_UP               | 24  | Up   | 4.02483E-08 | 2.56991E-06 |
| 76 | YAGI_AML_FAB_MARKERS                                  | 157 | Up   | 4.47754E-08 | 2.78494E-06 |
| 77 | REACTOME_SYNTHESIS_OF_VERY_LONG_CHAIN_FATTY_ACYL_COAS | 12  | Up   | 4.47948E-08 | 2.78494E-06 |
| 78 | AMIT_EGF_RESPONSE_60_HELA                             | 42  | Up   | 4.77791E-08 | 2.9319E-06  |
| 79 | ZHAN_MULTIPLE_MYELOMA_PR_UP                           | 42  | Down | 6.45945E-08 | 3.91294E-06 |
| 80 | BLUM_RESPONSE_TO_SALIRASIB_UP                         | 235 | Up   | 6.99662E-08 | 4.18468E-06 |
| 81 | BIOCARTA_PLATELETAPP_PATHWAY                          | 10  | Up   | 7.27859E-08 | 4.26417E-06 |

|     | A                                                    | B         | C           | D                  | E                  |
|-----|------------------------------------------------------|-----------|-------------|--------------------|--------------------|
| 82  | KANG_AR_TARGETS_DN                                   | 14        | Up          | 7.31E-08           | 4.26417E-06        |
| 83  | <b>LY_AGING_MIDDLE_DN</b>                            | <b>15</b> | <b>Down</b> | <b>7.42059E-08</b> | <b>4.27589E-06</b> |
| 84  | RUTELLA_RESPONSE_TO_HGF_UP                           | 348       | Up          | 8.54E-08           | 4.86E-06           |
| 85  | PLASARI_TGFB1_TARGETS_1HR_UP                         | 32        | Up          | 8.94E-08           | 4.98E-06           |
| 86  | COULOUARN_TEMPORAL_TGFB1_SIGNATURE_UP                | 100       | Up          | 8.96145E-08        | 4.98151E-06        |
| 87  | GALINDO_IMMUNE_RESPONSE_TO_ENTEROTOXIN               | 69        | Up          | 1.1166E-07         | 6.12827E-06        |
| 88  | AMIT_DELAYED_EARLY_GENES                             | 18        | Up          | 1.12838E-07        | 6.12827E-06        |
| 89  | TERAMOTO_OPN_TARGETS_CLUSTER_1                       | 11        | Up          | 1.14723E-07        | 6.15986E-06        |
| 90  | <b>REACTOME_CYTOSOLIC_TRNA_AMINOACYLATION</b>        | <b>24</b> | <b>Up</b>   | <b>1.27027E-07</b> | <b>6.74383E-06</b> |
| 91  | JI_RESPONSE_TO_FSH_UP                                | 66        | Up          | 1.33191E-07        | 6.92397E-06        |
| 92  | HU_GENOTOXIC_DAMAGE_24HR                             | 29        | Up          | 1.3335E-07         | 6.92397E-06        |
| 93  | KEGG_PPAR_SIGNALING_PATHWAY                          | 44        | Up          | 1.44929E-07        | 7.44334E-06        |
| 94  | AMUNDSON_RESPONSE_TO_ARSENITE                        | 199       | Up          | 1.72756E-07        | 8.77711E-06        |
| 95  | REICHERT_MITOSIS_LIN9_TARGETS                        | 28        | Down        | 1.75235E-07        | 8.80837E-06        |
| 96  | CHARAFE_BREAST_CANCER_LUMINAL_VS_BASAL_DN            | 383       | Up          | 1.96643E-07        | 9.78038E-06        |
| 97  | TIAN_TNF_SIGNALING_NOT_VIA_NFKB                      | 20        | Up          | 2.07905E-07        | 1.02328E-05        |
| 98  | WIERENGA_STAT5A_TARGETS_GROUP2                       | 39        | Up          | 2.29519E-07        | 1.11802E-05        |
| 99  | SMID_BREAST_CANCER_RELAPSE_IN_PLEURA_DN              | 12        | Up          | 2.6411E-07         | 1.27339E-05        |
| 100 | FERRARI_RESPONSE_TO_FENRETINIDE_UP                   | 18        | Up          | 2.84909E-07        | 1.3547E-05         |
| 101 | REACTOME_ACTIVATION_OF_CHAPERONE_GENES_BY_ATF6_ALPHA | 9         | Up          | 2.86708E-07        | 1.3547E-05         |
| 102 | GREENBAUM_E2A_TARGETS_UP                             | 31        | Down        | 2.98738E-07        | 1.38523E-05        |
| 103 | JEON_SMAD6_TARGETS_UP                                | 18        | Up          | 2.99034E-07        | 1.38523E-05        |
| 104 | REACTOME_METABOLISM_OF_LIPIDS_AND_LIPOPROTEINS       | 377       | Up          | 3.06897E-07        | 1.40785E-05        |
| 105 | NELSON_RESPONSE_TO_ANDROGEN_UP                       | 77        | Up          | 3.42224E-07        | 1.55481E-05        |

|     | A                                                                    | B         | C         | D               | E                  |
|-----|----------------------------------------------------------------------|-----------|-----------|-----------------|--------------------|
| 106 | BERENJENO_TRANSFORMED_BY_RHOA_REVERSI<br>BLY_DN                      | 28        | Up        | 3.92745E-07     | 1.76735E-05        |
| 107 | APPEL_IMATINIB_RESPONSE                                              | 25        | Up        | 3.97812E-07     | 1.77327E-05        |
| 108 | REACTOME_AMINO_ACID_SYNTHESIS_AND_INTE<br>RCONVERSION_TRANSAMINATION | 15        | Up        | 4.20749E-07     | 1.85798E-05        |
| 109 | DANG_MYC_TARGETS_DN                                                  | 30        | Up        | 4.2843E-07      | 1.86135E-05        |
| 110 | REACTOME_ACTIVATION_OF_CHAPERONES_BY_A<br>TF6_ALPHA                  | 11        | Up        | 4.29392E-07     | 1.86135E-05        |
| 111 | ZHANG_GATA6_TARGETS_DN                                               | 54        | Up        | 4.52299E-07     | 1.94283E-05        |
| 112 | GERHOLD_ADIPOGENESIS_UP                                              | 39        | Up        | 5.04745E-07     | 2.14858E-05        |
| 113 | PID_PLK1_PATHWAY                                                     | 46        | Down      | 5.34081E-07     | 2.25316E-05        |
| 114 | BURTON_ADIPOGENESIS_8                                                | 83        | Up        | 5.5774E-07      | 2.33214E-05        |
| 115 | REACTOME_KINESINS                                                    | 23        | Down      | 5.75141E-07     | 2.38381E-05        |
| 116 | KANG_DOXORUBICIN_RESISTANCE_UP                                       | 54        | Down      | 6.42457E-07     | 2.63966E-05        |
| 117 | HUANG_DASATINIB_RESISTANCE_UP                                        | 74        | Up        | 6.70855E-07     | 2.73258E-05        |
| 118 | DEMAGALHAES_AGING_UP                                                 | 40        | Up        | 6.92348E-07     | 2.79602E-05        |
| 119 | PARK_TRETINOIN_RESPONSE_AND_RARA_PLZF_<br>FUSION                     | 14        | Up        | 8.39251E-07     | 3.33934E-05        |
| 120 | REACTOME_CELL_EXTRACELLULAR_MATRIX_INTE<br>RACTIONS                  | 13        | Up        | 8.41018E-07     | 3.33934E-05        |
| 121 | PEDERSEN_METASTASIS_BY_ERBB2_ISOFORM_3                               | 18        | Up        | 8.52675E-07     | 3.35741E-05        |
| 122 | KERLEY_RESPONSE_TO_CISPLATIN_DN                                      | 5         | Up        | 8.7388E-07      | 3.41246E-05        |
| 123 | BERENJENO_ROCK_SIGNALING_NOT_VIA_RHOA_<br>DN                         | 46        | Up        | 9.59386E-07     | 3.71469E-05        |
| 124 | <b>AMIT_SERUM_RESPONSE_60_MCF10A</b>                                 | <b>51</b> | <b>Up</b> | <b>9.67E-07</b> | <b>3.71469E-05</b> |
| 125 | REACTOME_IRON_UPTAKE_AND_TRANSPORT                                   | 31        | Up        | 9.99E-07        | 3.78E-05           |
| 126 | FINAK_BREAST_CANCER_SDPP_SIGNATURE                                   | 11        | Up        | 9.99E-07        | 3.78E-05           |
| 127 | WANG_RESPONSE_TO_FORSKOLIN_UP                                        | 20        | Up        | 1.0803E-06      | 4.05111E-05        |
| 128 | SHETH_LIVER_CANCER_VS_TXNIP_LOSS_PAM3                                | 52        | Up        | 1.10103E-06     | 4.09634E-05        |
| 129 | SENESE_HDAC1_AND_HDAC2_TARGETS_DN                                    | 190       | Up        | 1.1842E-06      | 4.37135E-05        |



|     | A                                                        | B   | C    | D           | E           |
|-----|----------------------------------------------------------|-----|------|-------------|-------------|
| 130 | HOFFMANN_PRE_BI_TO_LARGE_PRE_BII_LYMPH<br>OCYTE_DN       | 59  | Up   | 1.22139E-06 | 4.47371E-05 |
| 131 | KEGG_LYSOSOME                                            | 108 | Up   | 1.27597E-06 | 4.63765E-05 |
| 132 | GUENTHER_GROWTH_SPHERICAL_VS_ADHERENT<br>_DN             | 23  | Up   | 1.45477E-06 | 5.24715E-05 |
| 133 | HELLER_HDAC_TARGETS_DN                                   | 238 | Up   | 1.49408E-06 | 5.34811E-05 |
| 134 | MARCHINI TRABECTEDIN_RESISTANCE_DN                       | 47  | Up   | 1.63386E-06 | 5.8045E-05  |
| 135 | SHEPARD_CRUSH_AND_BURN_MUTANT_DN                         | 161 | Down | 1.66415E-06 | 5.86799E-05 |
| 136 | BOQUEST_STEM_CELL_CULTURED_VS_FRESH_UP                   | 335 | Up   | 1.71942E-06 | 6.01798E-05 |
| 137 | DIRMEIER_LMP1_RESPONSE_EARLY                             | 53  | Up   | 1.83281E-06 | 6.36767E-05 |
| 138 | BURTON_ADIPOGENESIS_PEAK_AT_OHR                          | 53  | Up   | 1.92519E-06 | 6.63981E-05 |
| 139 | SHEPARD_BMYB_TARGETS                                     | 63  | Down | 2.15357E-06 | 7.37365E-05 |
| 140 | HENDRICKS_SMARCA4_TARGETS_UP                             | 45  | Up   | 2.1779E-06  | 7.40331E-05 |
| 141 | REACTOME_SMOOTH_MUSCLE_CONTRACTION                       | 23  | Up   | 2.2347E-06  | 7.5421E-05  |
| 142 | YAGUE_PRETUMOR_DRUG_RESISTANCE_DN                        | 13  | Up   | 2.57892E-06 | 8.64213E-05 |
| 143 | WANG_METHYLATED_IN_BREAST_CANCER                         | 33  | Up   | 2.73554E-06 | 9.1024E-05  |
| 144 | TONKS_TARGETS_OF_RUNX1_RUNX1T1_FUSION<br>_ERYTHROCYTE_UP | 120 | Up   | 2.77123E-06 | 9.10417E-05 |
| 145 | PETROVA_PROX1_TARGETS_DN                                 | 54  | Up   | 2.7746E-06  | 9.10417E-05 |
| 146 | BIOCARTA_FIBRINOLYSIS_PATHWAY                            | 5   | Up   | 3.10565E-06 | 0.000101201 |
| 147 | VALK_AML_CLUSTER_11                                      | 30  | Up   | 3.25419E-06 | 0.000105047 |
| 148 | PHONG_TNF_TARGETS_UP                                     | 54  | Up   | 3.26813E-06 | 0.000105047 |
| 149 | REN_ALVEOLAR_RHABDOMYOSARCOMA_DN                         | 395 | Up   | 3.92915E-06 | 0.000125441 |
| 150 | DANG_REGULATED_BY_MYC_DN                                 | 220 | Up   | 4.01295E-06 | 0.000127256 |
| 151 | RUTELLA_RESPONSE_TO_CSF2RB_AND_IL4_UP                    | 290 | Up   | 4.04414E-06 | 0.000127391 |
| 152 | IZADPANAHA_STEM_CELL_ADIPOSE_VS_BONE_UP                  | 104 | Up   | 4.28295E-06 | 0.000133465 |
| 153 | MCLACHLAN_DENTAL_CARIES_UP                               | 117 | Up   | 4.31597E-06 | 0.000133465 |
| 154 | SINGH_NFE2L2_TARGETS                                     | 15  | Up   | 4.32172E-06 | 0.000133465 |
| 155 | SASSON_RESPONSE_TO_GONADOTROPHINS_DN                     | 82  | Up   | 4.40207E-06 | 0.000135063 |

|     | A                                                                            | B         | C         | D                  | E                  |
|-----|------------------------------------------------------------------------------|-----------|-----------|--------------------|--------------------|
| 156 | TOMLINS_PROSTATE_CANCER_DN                                                   | 36        | Up        | 5.19989E-06        | 0.000158513        |
| 157 | CHANG_CORE_SERUM_RESPONSE_DN                                                 | 195       | Up        | 5.34631E-06        | 0.000161639        |
| 158 | KEGG_VALINE_LEUCINE_AND_ISOLEUCINE_DEGRADATION                               | 42        | Up        | 5.37086E-06        | 0.000161639        |
| 159 | CHANG_IMMORTALIZED_BY_HP31_DN                                                | 42        | Up        | 5.81961E-06        | 0.000174036        |
| 160 | PID_ATF2_PATHWAY                                                             | 48        | Up        | 5.92641E-06        | 0.000176115        |
| 161 | GLINSKY_CANCER_DEATH_UP                                                      | 7         | Down      | 5.97631E-06        | 0.000176488        |
| 162 | KUMAMOTO_RESPONSE_TO_NUTLIN_3A_DN                                            | 10        | Down      | 6.9825E-06         | 0.000203847        |
| 163 | LI_WILMS_TUMOR_VS_FETAL_KIDNEY_1_UP                                          | 175       | Up        | 6.98902E-06        | 0.000203847        |
| 164 | RUTELLA_RESPONSE_TO_HGF_VS_CSF2RB_AND_IL4_UP                                 | 331       | Up        | 7.22654E-06        | 0.000209481        |
| 165 | <b>TSAI_DNAJB4_TARGETS_DN</b>                                                | <b>6</b>  | <b>Up</b> | <b>7.90976E-06</b> | <b>0.000227888</b> |
| 166 | SHAFFER_IRF4_TARGETS_IN_PLASMA_CELL_VS_MATURE_B_LYMPHOCYTE                   | 62        | Up        | 8.25E-06           | 2.36E-04           |
| 167 | DAVICIONI_TARGETS_OF_PAX_FOXO1_FUSIONS_UP                                    | 234       | Up        | 8.63E-06           | 2.46E-04           |
| 168 | PARK_OSTEOBLAST_DIFFERENTIATION_BY_PHENYLAMIL_UP                             | 9         | Up        | 9.84689E-06        | 0.000278602        |
| 169 | KONDO_HYPOXIA                                                                | 3         | Up        | 1.03067E-05        | 0.000289877        |
| 170 | GARGALOVIC_RESPONSE_TO_OXIDIZED_PHOSPHOLIPIDS_TURQUOISE_UP                   | 73        | Up        | 1.0607E-05         | 0.000296555        |
| 171 | WHITFIELD_CELL_CYCLE_LITERATURE                                              | 43        | Down      | 1.08311E-05        | 0.000301041        |
| 172 | <b>POS_HISTAMINE_RESPONSE_NETWORK</b>                                        | <b>27</b> | <b>Up</b> | <b>1.19367E-05</b> | <b>0.00032807</b>  |
| 173 | REACTOME_TRANSPORT_OF_INORGANIC_CATIONS_ANIONS_AND_AMINO_ACIDS_OLIGOPEPTIDES | 66        | Up        | 1.19424E-05        | 0.00032807         |
| 174 | RORIE_TARGETS_OF_EWSR1_FLI1_FUSION_UP                                        | 25        | Up        | 1.31102E-05        | 0.000356632        |
| 175 | UEDA_PERIPHERAL_CLOCK                                                        | 156       | Up        | 1.31331E-05        | 0.000356632        |
| 176 | CASORELLI_APL_SECONDARY_VS_DE_NOVO_UP                                        | 34        | Up        | 1.34594E-05        | 0.000363404        |
| 177 | ROSTY_CERVICAL_CANCER_PROLIFERATION_CLUSTER                                  | 138       | Down      | 1.44003E-05        | 0.000386598        |
| 178 | PLASARI_TGFB1_TARGETS_10HR_UP                                                | 169       | Up        | 1.45455E-05        | 0.00038829         |

|     | A                                                   | B   | C    | D           | E           |
|-----|-----------------------------------------------------|-----|------|-------------|-------------|
| 179 | LEONARD_HYPOXIA                                     | 45  | Up   | 1.47837E-05 | 0.000392432 |
| 180 | BOYALT_LIVER_CANCER_SUBCLASS_G56_DN                 | 16  | Up   | 1.65487E-05 | 0.000436829 |
| 181 | QI_HYPOXIA                                          | 134 | Up   | 1.72632E-05 | 0.00045316  |
| 182 | NAKAMURA_ADIPOGENESIS_LATE_DN                       | 35  | Up   | 1.76649E-05 | 0.000461141 |
| 183 | MYLLYKANGAS_AMPLIFICATION_HOT_SPOT_21               | 4   | Up   | 1.8217E-05  | 0.000471032 |
| 184 | XU_HGF_SIGNALING_NOT_VIA_AKT1_48HR_UP               | 31  | Up   | 1.82432E-05 | 0.000471032 |
| 185 | GAUSSMANN_MLL_AF4_FUSION_TARGETS_F_D<br>N           | 27  | Up   | 1.86112E-05 | 0.000475923 |
| 186 | YAMASHITA_LIVER_CANCER_STEM_CELL_DN                 | 39  | Up   | 1.8634E-05  | 0.000475923 |
| 187 | REACTOME_BASIGIN_INTERACTIONS                       | 20  | Up   | 1.9198E-05  | 0.000487692 |
| 188 | TIEN_INTESTINE_PROBIOTICS_24HR_DN                   | 202 | Up   | 1.97329E-05 | 0.0004986   |
| 189 | DELYS_THYROID_CANCER_UP                             | 343 | Up   | 1.98509E-05 | 0.000498912 |
| 190 | SUNG_METASTASIS_STROMA_UP                           | 103 | Up   | 1.99794E-05 | 0.000499484 |
| 191 | CEBALLOS_TARGETS_OF_TP53_AND_MYC_UP                 | 19  | Up   | 2.03894E-05 | 0.000505954 |
| 192 | PICCALUGA_ANGIOIMMUNOBLASTIC_LYMPHOMA<br>UP         | 155 | Up   | 2.04523E-05 | 0.000505954 |
| 193 | SHETH_LIVER_CANCER_VS_TXNIP_LOSS_PAM2               | 130 | Up   | 2.06246E-05 | 0.000506943 |
| 194 | MARZEC_IL2_SIGNALING_UP                             | 89  | Up   | 2.07777E-05 | 0.000506943 |
| 195 | YAO_TEMPORAL_RESPONSE_TO_PROGESTERON<br>E_CLUSTER_5 | 21  | Up   | 2.09524E-05 | 0.000506943 |
| 196 | WANG_RESPONSE_TO_ANDROGEN_UP                        | 26  | Up   | 2.09875E-05 | 0.000506943 |
| 197 | MAHADEVAN_RESPONSE_TO_MP470_UP                      | 8   | Up   | 2.10287E-05 | 0.000506943 |
| 198 | THEILGAARD_NEUTROPHIL_AT_SKIN_WOUND_U<br>P          | 62  | Up   | 2.11717E-05 | 0.000507799 |
| 199 | REACTOME_ETHANOL_OXIDATION                          | 4   | Up   | 2.14238E-05 | 0.00051125  |
| 200 | CUI_GLUCOSE_DEPRIVATION                             | 53  | Up   | 2.30108E-05 | 0.000546361 |
| 201 | NAKAMURA_ADIPOGENESIS_LATE_UP                       | 88  | Up   | 2.41895E-05 | 0.000569968 |
| 202 | GAUTSCHI_SRC_SIGNALING                              | 8   | Up   | 2.42463E-05 | 0.000569968 |
| 203 | REACTOME_TRIGLYCERIDE_BIOSYNTHESIS                  | 35  | Up   | 2.45685E-05 | 0.000572942 |
| 204 | BORLAK_LIVER_CANCER_EGF_UP                          | 48  | Up   | 2.46153E-05 | 0.000572942 |
| 205 | SOTIRIOU_BREAST_CANCER_GRADE_1_VS_3_UP              | 149 | Down | 2.56606E-05 | 0.000592089 |

|     | A                                                   | B         | C         | D                  | E                  |
|-----|-----------------------------------------------------|-----------|-----------|--------------------|--------------------|
| 206 | <b>FOURNIER_ACINAR_DEVELOPMENT_EARLY_DN</b>         | <b>6</b>  | <b>Up</b> | <b>2.56885E-05</b> | <b>0.000592089</b> |
| 207 | NAKAMURA_ADIPOGENESIS_EARLY_DN                      | 32        | Up        | 2.67E-05           | 6.13E-04           |
| 208 | ONDER_CDH1_TARGETS_2_UP                             | 225       | Up        | 2.96E-05           | 6.74E-04           |
| 209 | GAVIN_FOXP3_TARGETS_CLUSTER_P6                      | 79        | Down      | 2.96792E-05        | 0.000674203        |
| 210 | ZHANG_ANTIVIRAL_RESPONSE_TO_RIBAVIRIN_D<br>N        | 38        | Up        | 3.03432E-05        | 0.000685989        |
| 211 | TSENG_IRS1_TARGETS_UP                               | 96        | Up        | 3.17676E-05        | 0.000714772        |
| 212 | APRELIKOVA_BRCA1_TARGETS                            | 48        | Up        | 3.4042E-05         | 0.000762315        |
| 213 | <b>CUI_TCF21_TARGETS_DN</b>                         | <b>24</b> | <b>Up</b> | <b>3.4872E-05</b>  | <b>0.000777217</b> |
| 214 | UZONYI_RESPONSE_TO_LEUKOTRIENE_AND_THR<br>OMBIN     | 29        | Up        | 3.53743E-05        | 0.000784711        |
| 215 | SASSON_FSH_RESPONSE                                 | 9         | Up        | 3.62155E-05        | 0.000799618        |
| 216 | HASINA_NOL7_TARGETS_UP                              | 13        | Up        | 3.71403E-05        | 0.000816223        |
| 217 | NEWMAN_ERCC6_TARGETS_UP                             | 17        | Up        | 3.75298E-05        | 0.000820965        |
| 218 | ABE_VEGFA_TARGETS_2HR                               | 25        | Up        | 3.79987E-05        | 0.000827392        |
| 219 | KHETCHOUMIAN_TRIM24_TARGETS_UP                      | 42        | Up        | 4.13821E-05        | 0.000895142        |
| 220 | KANG_FLUOROURACIL_RESISTANCE_DN                     | 15        | Up        | 4.16593E-05        | 0.000895142        |
| 221 | AMIT_EGF_RESPONSE_240_HELA                          | 55        | Up        | 4.16785E-05        | 0.000895142        |
| 222 | CHARAFE_BREAST_CANCER_LUMINAL_VS_MESE<br>NCHYMAL_DN | 430       | Up        | 4.20486E-05        | 0.000899004        |
| 223 | LU_IL4_SIGNALING                                    | 67        | Up        | 4.43118E-05        | 0.000943122        |
| 224 | MCDOWELL_ACUTE_LUNG_INJURY_UP                       | 35        | Up        | 4.51077E-05        | 0.000955756        |
| 225 | HOSHIDA_LIVER_CANCER_SUBCLASS_S1                    | 193       | Up        | 4.5583E-05         | 0.000961517        |
| 226 | CROMER_TUMORIGENESIS_UP                             | 43        | Up        | 4.80392E-05        | 0.001005033        |
| 227 | PLASARI_TGFB1_SIGNALING_VIA_NFIC_10HR_DN            | 22        | Up        | 4.80714E-05        | 0.001005033        |
| 228 | PENG_LEUCINE_DEPRIVATION_UP                         | 121       | Up        | 4.89516E-05        | 0.001018927        |
| 229 | HELLEBREKERS_SILENCED_DURING_TUMOR_ANG<br>IOGENESIS | 72        | Up        | 4.95677E-05        | 0.001025948        |
| 230 | HU_GENOTOXIC_DAMAGE_4HR                             | 33        | Down      | 4.97232E-05        | 0.001025948        |
| 231 | YAO_TEMPORAL_RESPONSE_TO_PROGESTERON<br>E_CLUSTER_4 | 11        | Up        | 5.15794E-05        | 0.00105962         |

|     | A                                                       | B         | C         | D                  | E                  |
|-----|---------------------------------------------------------|-----------|-----------|--------------------|--------------------|
| 232 | COLIN_PILOCYTIC_ASTROCYTOMA_VS_GLIOBLASTOMA_DN          | 24        | Up        | 5.59871E-05        | 0.001145192        |
| 233 | CHICAS_RB1_TARGETS_CONFLUENT                            | 485       | Up        | 5.99203E-05        | 0.00122036         |
| 234 | LI_WILMS_TUMOR_ANAPLASTIC_UP                            | 19        | Down      | 6.02728E-05        | 0.001222271        |
| 235 | LIN_SILENCED_BY_TUMOR_MICROENVIRONMENT                  | 64        | Up        | 6.19901E-05        | 0.001251723        |
| 236 | REACTOME_COPI_MEDIATED_TRANSPORT                        | 10        | Down      | 6.2364E-05         | 0.001253915        |
| 237 | NEMETH_INFLAMMATORY_RESPONSE_LPS_UP                     | 67        | Up        | 6.74667E-05        | 0.001350764        |
| 238 | KEGG_PYRUVATE_METABOLISM                                | 34        | Up        | 7.5152E-05         | 0.001492661        |
| 239 | LI_INDUCED_T_TO_NATURAL_KILLER_UP                       | 230       | Up        | 7.51859E-05        | 0.001492661        |
| 240 | PLASARI_NFIC_TARGETS_BASAL_DN                           | 14        | Up        | 7.55257E-05        | 0.001493134        |
| 241 | PID_UPA_UPAR_PATHWAY                                    | 24        | Up        | 7.80205E-05        | 0.001536029        |
| 242 | COULOUARN_TEMPORAL_TGFB1_SIGNATURE_DN                   | 114       | Up        | 8.12153E-05        | 0.001592292        |
| 243 | GINESTIER_BREAST_CANCER_ZNF217_AMPLIFIED_DN             | 309       | Down      | 8.32607E-05        | 0.001625649        |
| 244 | JOHNSTONE_PARVB_TARGETS_3_UP                            | 405       | Up        | 8.42607E-05        | 0.001638402        |
| 245 | OHASHI_AURKB_TARGETS                                    | 8         | Down      | 8.48983E-05        | 0.001640494        |
| 246 | SHAFFER_IRF4_MULTIPLE_MYELOMA_PROGRAM                   | 32        | Up        | 8.50627E-05        | 0.001640494        |
| 247 | <b>BURTON_ADIPOGENESIS_1</b>                            | <b>29</b> | <b>Up</b> | <b>8.56681E-05</b> | <b>0.001645455</b> |
| 248 | TANG_SENESCENCE_TP53_TARGETS_DN                         | 50        | Down      | 9.38E-05           | 1.79E-03           |
| 249 | DALESSIO_TSA_RESPONSE                                   | 19        | Up        | 9.44E-05           | 1.80E-03           |
| 250 | DASU_IL6_SIGNALING_DN                                   | 7         | Up        | 9.47584E-05        | 0.001798127        |
| 251 | TURASHVILI_BREAST_DUCTAL_CARCINOMA_VS_LOBULAR_NORMAL_DN | 46        | Up        | 0.000101407        | 0.001916589        |
| 252 | ODONNELL_TFRC_TARGETS_DN                                | 115       | Down      | 0.000104061        | 0.001958923        |
| 253 | BURTON_ADIPOGENESIS_PEAK_AT_2HR                         | 45        | Up        | 0.000104907        | 0.001967           |
| 254 | <b>KANG_DOXORUBICIN_RESISTANCE_DN</b>                   | <b>19</b> | <b>Up</b> | <b>0.000106459</b> | <b>0.001988224</b> |
| 255 | JEPSEN_SMRT_TARGETS                                     | 32        | Up        | 0.00010694         | 0.00198934         |
| 256 | SCIAN_CELL_CYCLE_TARGETS_OF_TP53_AND_TP73_DN            | 21        | Down      | 0.000109491        | 0.002028807        |

|     | A                                                                 | B   | C    | D           | E           |
|-----|-------------------------------------------------------------------|-----|------|-------------|-------------|
| 257 | HUANG_GATA2_TARGETS_DN                                            | 62  | Up   | 0.00011338  | 0.002092664 |
| 258 | KEGG_TRYPTOPHAN_METABOLISM                                        | 26  | Up   | 0.000114779 | 0.002110241 |
| 259 | BURTON_ADIPOGENESIS_9                                             | 82  | Up   | 0.000117827 | 0.002157886 |
| 260 | WIEMANN_TELOMERE_SHORTENING_AND_CHRONIC_LIVER_DAMAGE_DN           | 4   | Up   | 0.000119245 | 0.002174143 |
| 261 | PHONG_TNF_RESPONSE_NOT_VIA_P38                                    | 308 | Up   | 0.000119635 | 0.002174143 |
| 262 | LIANG_HEMATOPOIESIS_STEM_CELL_NUMBER_QUALITY                      | 15  | Down | 0.000123875 | 0.002242557 |
| 263 | PID_INTEGRIN3_PATHWAY                                             | 36  | Up   | 0.000125976 | 0.002271888 |
| 264 | ONDER_CDH1_SIGNALING_VIA_CTNNB1                                   | 73  | Up   | 0.000134701 | 0.002420007 |
| 265 | CHIANG_LIVER_CANCER_SUBCLASS_PROLIFERATION_UP                     | 169 | Down | 0.0001368   | 0.002448407 |
| 266 | LEE_LIVER_CANCER_ACOX1_UP                                         | 47  | Up   | 0.000137546 | 0.002452474 |
| 267 | SESTO_RESPONSE_TO_UV_C5                                           | 46  | Up   | 0.000140574 | 0.00249704  |
| 268 | LEI_HOXC8_TARGETS_DN                                              | 15  | Up   | 0.000142355 | 0.002516881 |
| 269 | YAMAZAKI_TCEB3_TARGETS_UP                                         | 157 | Up   | 0.000142756 | 0.002516881 |
| 270 | KEGG_AMINOACYL_TRNA_BIOSYNTHESIS                                  | 41  | Up   | 0.000150397 | 0.002641725 |
| 271 | BRUECKNER_TARGETS_OF_MIRLET7A3_DN                                 | 67  | Up   | 0.000160962 | 0.002816842 |
| 272 | SASSON_RESPONSE_TO_FORSKOLIN_DN                                   | 83  | Up   | 0.000163251 | 0.002846348 |
| 273 | ZHU_CMV_ALL_DN                                                    | 111 | Up   | 0.000168297 | 0.002923536 |
| 274 | SAGIV_CD24_TARGETS_DN                                             | 39  | Up   | 0.000171731 | 0.002972269 |
| 275 | ZERBINI_RESPONSE_TO_SULINDAC_UP                                   | 6   | Up   | 0.00017638  | 0.003041589 |
| 276 | REACTOME_ALPHA_LINOLENIC_ACID_ALA_METABOLISM                      | 11  | Up   | 0.00017793  | 0.00305716  |
| 277 | REACTOME_MITOTIC_PROMETAPHASE                                     | 85  | Down | 0.000178581 | 0.003057229 |
| 278 | SCHUETZ_BREAST_CANCER_DUCTAL_INVASIVE_UMP                         | 252 | Up   | 0.000179828 | 0.003067465 |
| 279 | TONKS_TARGETS_OF_RUNX1_RUNX1T1_FUSION_SUSTAINED_IN_ERYTHROCYTE_UP | 35  | Up   | 0.000185741 | 0.003156933 |
| 280 | NIELSEN_LEIOMYOSARCOMA_CNN1_UP                                    | 18  | Up   | 0.000190911 | 0.003233176 |
| 281 | ZHU_SKIL_TARGETS_UP                                               | 17  | Up   | 0.000197566 | 0.003329854 |
| 282 | REACTOME_MRNA_SPLICING                                            | 106 | Down | 0.000198029 | 0.003329854 |

|     | A                                                 | B          | C           | D                  | E                  |
|-----|---------------------------------------------------|------------|-------------|--------------------|--------------------|
| 283 | LIU_VAV3_PROSTATE_CARCINOGENESIS_DN               | 13         | Up          | 0.000199241        | 0.003338353        |
| 284 | BROWN_MYELOID_CELL_DEVELOPMENT_UP                 | 99         | Up          | 0.000206869        | 0.003453907        |
| 285 | PETRETTO_CARDIAC_HYPERTROPHY                      | 30         | Up          | 0.000211721        | 0.003512461        |
| 286 | AGARWAL_AKT_PATHWAY_TARGETS                       | 9          | Up          | 0.000211863        | 0.003512461        |
| 287 | ISHIDA_E2F_TARGETS                                | 51         | Down        | 0.000215228        | 0.003555777        |
| 288 | <b>CHANG_CYCLING_GENES</b>                        | <b>144</b> | <b>Down</b> | <b>0.000217807</b> | <b>0.003585843</b> |
| 289 | GOLUB_ALL_VS_AML_DN                               | 16         | Up          | 2.22E-04           | 3.63E-03           |
| 290 | VERHAAK_GLIOMASTOMA_MESENCHYMAL                   | 164        | Up          | 2.23E-04           | 3.65E-03           |
| 291 | AKL_HTLV1_INFECTION_DN                            | 52         | Up          | 0.000226815        | 0.003695527        |
| 292 | LEE_LIVER_CANCER_MYC_TGFA_UP                      | 51         | Up          | 0.000228636        | 0.003712387        |
| 293 | REACTOME_KERATAN_SULFATE_DEGRADATION              | 5          | Up          | 0.000231542        | 0.003734621        |
| 294 | KRIGE_RESPONSE_TO_TOSEDOSTAT_24HR_UP              | 690        | Up          | 0.000231586        | 0.003734621        |
| 295 | <b>KIM_WT1_TARGETS_8HR_UP</b>                     | <b>149</b> | <b>Up</b>   | <b>0.000235932</b> | <b>0.00379177</b>  |
| 296 | GROSS_ELK3_TARGETS_DN                             | 22         | Up          | 0.000245076        | 0.003903781        |
| 297 | BIOCARTA_RANMS_PATHWAY                            | 10         | Down        | 0.000245263        | 0.003903781        |
| 298 | BERENJENO_TRANSFORMED_BY_RHOA_DN                  | 364        | Up          | 0.000245381        | 0.003903781        |
| 299 | IGLESIAS_E2F_TARGETS_UP                           | 126        | Up          | 0.000247136        | 0.003918516        |
| 300 | PETROVA_ENDOTHELIUM_LYMPHATIC_VS_BLOOD_DN         | 140        | Up          | 0.000253347        | 0.004003562        |
| 301 | ONDER_CDH1_TARGETS_3_UP                           | 15         | Up          | 0.000254686        | 0.004011299        |
| 302 | DOANE_BREAST_CANCER_ESR1_DN                       | 26         | Up          | 0.000258625        | 0.004059807        |
| 303 | LY_AGING_OLD_DN                                   | 53         | Down        | 0.000266036        | 0.004162311        |
| 304 | LEE_AGING_NEOCORTEX_UP                            | 71         | Up          | 0.000268189        | 0.004182163        |
| 305 | DEMAGALHAES_AGING_DN                              | 14         | Up          | 0.000271972        | 0.004227198        |
| 306 | WIEDERSCHAIN_TARGETS_OF_BMI1_AND_PCGF2            | 49         | Up          | 0.000277159        | 0.00429369         |
| 307 | ZHU_CMV_24_HR_DN                                  | 80         | Up          | 0.000282621        | 0.004363999        |
| 308 | DELPUECH_FOXO3_TARGETS_DN                         | 35         | Up          | 0.000285783        | 0.004378725        |
| 309 | SEITZ_NEOPLASTIC_TRANSFORMATION_BY_8P_DELETION_DN | 26         | Up          | 0.000285898        | 0.004378725        |
| 310 | KUWANO_RNA_STABILIZED_BY_NO                       | 6          | Up          | 0.000286355        | 0.004378725        |
| 311 | BOYLAN_MULTIPLE_MYELOMA_D_CLUSTER_UP              | 25         | Up          | 0.00029206         | 0.004447951        |

|     | A                                                              | B         | C         | D                  | E                  |
|-----|----------------------------------------------------------------|-----------|-----------|--------------------|--------------------|
| 312 | ALTEMEIER_RESPONSE_TO_LPS_WITH_MECHANICAL_VENTILATION          | 72        | Up        | 0.000292765        | 0.004447951        |
| 313 | SENESE_HDAC2_TARGETS_DN                                        | 106       | Up        | 0.000296017        | 0.004482944        |
| 314 | KEGG_FATTY_ACID_METABOLISM                                     | 32        | Up        | 0.000300899        | 0.004542322        |
| 315 | ZWANG_CLASS_2_TRANSIENTLY_INDUCED_BY_EGF                       | 33        | Up        | 0.000324439        | 0.004882078        |
| 316 | CLASPER_LYMPHATIC_VESSELS_DURING_METASTASIS_UP                 | 15        | Up        | 0.000330337        | 0.004955058        |
| 317 | CHIARADONNA_NEOPLASTIC_TRANSFORMATION_CDC25_DN                 | 137       | Up        | 0.000338135        | 0.00505597         |
| 318 | LEE_SP4_THYMOCYTE                                              | 11        | Up        | 0.000342168        | 0.005100136        |
| 319 | EGUCHI_CELL_CYCLE_RB1_TARGETS                                  | 23        | Down      | 0.000348687        | 0.00518097         |
| 320 | KRASNOSELSKAYA_ILF3_TARGETS_DN                                 | 43        | Up        | 0.000353059        | 0.005229481        |
| 321 | OHASHI_AURKA_TARGETS                                           | 6         | Down      | 0.000355649        | 0.005251379        |
| 322 | TRACEY_RESISTANCE_TO_IFNA2_DN                                  | 27        | Up        | 0.000370171        | 0.005448779        |
| 323 | NAKAYAMA_SOFT_TISSUE_TUMORS_PCA2_UP                            | 77        | Down      | 0.000374284        | 0.005492215        |
| 324 | LINDVALL_IMMORTALIZED_BY_TERT_UP                               | 64        | Up        | 0.000387535        | 0.005653032        |
| 325 | RAGHAVACHARI_PLATELET_SPECIFIC_GENES                           | 59        | Up        | 0.000387637        | 0.005653032        |
| 326 | NADLER_OBESITY_DN                                              | 34        | Up        | 0.000391414        | 0.005674133        |
| 327 | REACTOME_GLYCEROPHOSPHOLIPID_BIOSYNTHESIS                      | 69        | Up        | 0.000391485        | 0.005674133        |
| 328 | REACTOME_BIOLOGICAL_OXIDATIONS                                 | 65        | Up        | 0.00040231         | 0.005813199        |
| 329 | <b>ALONSO_METASTASIS_EMT_UP</b>                                | <b>30</b> | <b>Up</b> | <b>0.000428442</b> | <b>0.006171921</b> |
| 330 | MAINA_VHL_TARGETS_DN                                           | 16        | Up        | 4.39E-04           | 6.30E-03           |
| 331 | AMIT_EGF_RESPONSE_120_HELA                                     | 61        | Up        | 4.42E-04           | 6.34E-03           |
| 332 | REACTOME_FATTY_ACID_TRIACYLGLYCEROL_AND_KETONE_BODY_METABOLISM | 150       | Up        | 0.000449614        | 0.006412354        |
| 333 | CREIGHTON_ENDOCRINE_THERAPY_RESISTANCE_3                       | 617       | Up        | 0.000450561        | 0.006412354        |
| 334 | KEGG_ONE_CARBON_POOL_BY_FOLATE                                 | 16        | Up        | 0.000459057        | 0.00651364         |
| 335 | BIOCARTA_MCALPAIN_PATHWAY                                      | 21        | Up        | 0.000471881        | 0.006675557        |



|     | A                                                          | B   | C    | D           | E           |
|-----|------------------------------------------------------------|-----|------|-------------|-------------|
| 336 | REACTOME_INFLUENZA_VIRAL_RNA_TRANSCRIPTION_AND_REPLICATION | 97  | Down | 0.00047591  | 0.006712465 |
| 337 | WENG_POR_DOSAGE                                            | 15  | Up   | 0.000479218 | 0.00672881  |
| 338 | BOYLAN_MULTIPLE_MYELOMA_C_CLUSTER_DN                       | 27  | Up   | 0.000479917 | 0.00672881  |
| 339 | IGARASHI_ATF4_TARGETS_UP                                   | 5   | Up   | 0.000484645 | 0.006774989 |
| 340 | ZHENG_RESPONSE_TO_ARSENITE_UP                              | 15  | Up   | 0.000490396 | 0.006824246 |
| 341 | COWLING_MYCN_TARGETS                                       | 33  | Up   | 0.000491057 | 0.006824246 |
| 342 | BIOCARTA_VITCB_PATHWAY                                     | 10  | Up   | 0.00049384  | 0.006842796 |
| 343 | SWEET_KRAS_TARGETS_UP                                      | 76  | Up   | 0.000507044 | 0.007005209 |
| 344 | GARGALOVIC_RESPONSE_TO_OXIDIZED_PHOSPHOLIPIDS_TURQUOISE_DN | 49  | Down | 0.0005147   | 0.007090261 |
| 345 | SHAFFER_IRF4_TARGETS_IN_MYELOMA_VS_MATURE_B_LYMPHOCYTE     | 97  | Up   | 0.000518822 | 0.00712626  |
| 346 | LAIHO_COLORECTAL_CANCER_SERRATED_UP                        | 105 | Up   | 0.000520402 | 0.007127247 |
| 347 | YOSHIMURA_MAPK8_TARGETS_DN                                 | 325 | Up   | 0.000522231 | 0.007131619 |
| 348 | SU_TESTIS                                                  | 55  | Down | 0.000549302 | 0.007479694 |
| 349 | TORCHIA_TARGETS_OF_EWSR1_FLI1_FUSION_DN                    | 269 | Up   | 0.000551495 | 0.007487969 |
| 350 | VERRECCHIA_RESPONSE_TO_TGFB1_C1                            | 19  | Up   | 0.000553744 | 0.007488025 |
| 351 | REACTOME_PROCESSING_OF_CAPPED_INTRON_CONTAINING_PRE_MRNA   | 135 | Down | 0.000554669 | 0.007488025 |
| 352 | FEVR_CTNNB1_TARGETS_UP                                     | 528 | Up   | 0.000567328 | 0.00763711  |
| 353 | HUPER_BREAST_BASAL_VS_LUMINAL_DN                           | 46  | Up   | 0.000575734 | 0.007728249 |
| 354 | ZWANG_CLASS_3_TRANSIENTLY_INDUCED_BY_EGF                   | 189 | Up   | 0.000590914 | 0.007909537 |
| 355 | REACTOME_MRNA_PROCESSING                                   | 151 | Down | 0.000593408 | 0.00791682  |
| 356 | MIYAGAWA_TARGETS_OF_EWSR1_ETS_FUSIONS_DN                   | 187 | Up   | 0.00059573  | 0.00791682  |
| 357 | DUTERTRE ESTRADIOL_RESPONSE_6HR_UP                         | 214 | Up   | 0.000596484 | 0.00791682  |
| 358 | REACTOME_TRNA_AMINOACYLATION                               | 42  | Up   | 0.000611027 | 0.008087126 |
| 359 | KEGG_GLYCINE_SERINE_AND_THREONINE_METABOLISM               | 24  | Up   | 0.000619223 | 0.008172394 |

|     | A                                                | B         | C         | D                  | E                  |
|-----|--------------------------------------------------|-----------|-----------|--------------------|--------------------|
| 360 | REACTOME_3_UTR_MEDIATED_TRANSLATIONAL_REGULATION | 102       | Down      | 0.000620929        | 0.008172394        |
| 361 | HOLLEMAN_PREDNISOLONE_RESISTANCE_B_ALL_DN        | 7         | Up        | 0.00063068         | 0.008277669        |
| 362 | LIU_VAV3_PROSTATE_CARCINOGENESIS_UP              | 49        | Up        | 0.000639697        | 0.008372759        |
| 363 | WATTEL_AUTONOMOUS_THYROID_ADENOMA_DN             | 40        | Up        | 0.000656202        | 0.00855917         |
| 364 | CHARAFE_BREAST_CANCER_BASAL_VS_MESENCHYMAL_DN    | 47        | Up        | 0.000657562        | 0.00855917         |
| 365 | WANG_RESPONSE_TO_GSK3_INHIBITOR_SB216763_DN      | 330       | Up        | 0.00067072         | 0.008706468        |
| 366 | MCBRYAN_PUBERTAL_BREAST_5_6WK_UP                 | 96        | Up        | 0.000696856        | 0.009007364        |
| 367 | LINDSTEDT_DENDRITIC_CELL_MATURATION_B            | 43        | Up        | 0.000697713        | 0.009007364        |
| 368 | VECCHI_GASTRIC_CANCER_ADVANCED_VS_EARLY_UP       | 145       | Up        | 0.00070126         | 0.009028486        |
| 369 | SMITH_TERT_TARGETS_DN                            | 76        | Up        | 0.00073717         | 0.009465018        |
| 370 | <b>TSUDA_ALVEOLAR_SOFT_PART_SARCOMA</b>          | <b>10</b> | <b>Up</b> | <b>0.00074299</b>  | <b>0.009513898</b> |
| 371 | MYLLYKANGAS_AMPLIFICATION_HOT_SPOT_16            | 9         | Up        | 7.53E-04           | 9.60E-03           |
| 372 | MATTHEWS_AP1_TARGETS                             | 15        | Up        | 7.53E-04           | 9.60E-03           |
| 373 | GESERICK_TERT_TARGETS_DN                         | 21        | Up        | 0.000756197        | 0.009604928        |
| 374 | MORI_LARGE_PRE_BII_LYMPHOCYTE_UP                 | 82        | Down      | 0.000758315        | 0.009606           |
| 375 | NUYTEN_EZH2_TARGETS_UP                           | 911       | Up        | 0.000772152        | 0.009755124        |
| 376 | BILBAN_B_CLL_LPL_UP                              | 52        | Up        | 0.000778828        | 0.009813228        |
| 377 | <b>KEGG_PROPANOATE_METABOLISM</b>                | <b>29</b> | <b>Up</b> | <b>0.000781134</b> | <b>0.009816117</b> |
| 378 | MARKEY_RB1_CHRONIC_LOF_UP                        | 99        | Up        | 0.000797569        | 0.009996056        |
| 379 | JOHNSTONE_PARVB_TARGETS_2_UP                     | 128       | Up        | 0.000803531        | 0.010044143        |
| 380 | REACTOME_GLYCOPROTEIN_HORMONES                   | 2         | Up        | 0.000814198        | 0.010150622        |
| 381 | PANGAS_TUMOR_SUPPRESSION_BY_SMAD1_AND_SMAD5_UP   | 113       | Up        | 0.000817949        | 0.010170544        |
| 382 | LOPEZ_MESOTELIOMA_SURVIVAL_TIME_UP               | 14        | Down      | 0.000826787        | 0.010233904        |
| 383 | WONG_ADULT_TISSUE_STEM_MODULE                    | 591       | Up        | 0.000827376        | 0.010233904        |

|     | A                                                            | B   | C    | D           | E           |
|-----|--------------------------------------------------------------|-----|------|-------------|-------------|
| 384 | BERENJENO_ROCK_SIGNALING_NOT_VIA_RHOA_UP                     | 21  | Up   | 0.000833746 | 0.010285767 |
| 385 | CAIRO_HEPATOBLASTOMA_CLASSES_DN                              | 150 | Up   | 0.000841425 | 0.010336725 |
| 386 | WANG_SMARCE1_TARGETS_UP                                      | 228 | Up   | 0.000842252 | 0.010336725 |
| 387 | PEDERSEN_METASTASIS_BY_ERBB2_ISOFORM_4                       | 93  | Up   | 0.000856838 | 0.010462094 |
| 388 | HORIUCHI_WTAP_TARGETS_UP                                     | 258 | Up   | 0.000856895 | 0.010462094 |
| 389 | TOMIDA_METASTASIS_DN                                         | 15  | Up   | 0.000874615 | 0.010650918 |
| 390 | BROCKE_APOPTOSIS_REVERSED_BY_IL6                             | 133 | Up   | 0.000886915 | 0.010764286 |
| 391 | ZHAN_LATE_DIFFERENTIATION_GENES_UP                           | 28  | Up   | 0.000888481 | 0.010764286 |
| 392 | BAE_BRCA1_TARGETS_UP                                         | 71  | Up   | 0.000910081 | 0.010997784 |
| 393 | CROONQUIST_NRAS_SIGNALING_UP                                 | 20  | Up   | 0.000924216 | 0.011140099 |
| 394 | FARMER_BREAST_CANCER_APOCRINE_VS_LUMINAL                     | 270 | Up   | 0.00094798  | 0.011397468 |
| 395 | ROSS_AML_WITH_CFBF_MYH11_FUSION                              | 34  | Up   | 0.000957522 | 0.011473586 |
| 396 | MODY_HIPPOCAMPUS_NEONATAL                                    | 33  | Up   | 0.000959168 | 0.011473586 |
| 397 | RICKMAN_HEAD_AND_NECK_CANCER_B                               | 21  | Up   | 0.000969581 | 0.011568868 |
| 398 | PID_AVB3_INTEGRIN_PATHWAY                                    | 67  | Up   | 0.000975724 | 0.011612834 |
| 399 | LEE_EARLY_T_LYMPHOCYTE_UP                                    | 94  | Down | 0.000986376 | 0.011687366 |
| 400 | HOUSTIS_ROS                                                  | 32  | Up   | 0.000986933 | 0.011687366 |
| 401 | AMIT_SERUM_RESPONSE_40_MCF10A                                | 27  | Up   | 0.001004348 | 0.011833356 |
| 402 | ZHOU_CELL_CYCLE_GENES_IN_IR_RESPONSE_24_HR                   | 120 | Down | 0.001005466 | 0.011833356 |
| 403 | GARGALOVIC_RESPONSE_TO_OXIDIZED_PHOSPHOLIPIDS_BLACK_UP       | 32  | Up   | 0.001006774 | 0.011833356 |
| 404 | WAKABAYASHI_ADIPOGENESIS_PPARG_RXRA_BOUND_WITH_H4K20ME1_MARK | 140 | Up   | 0.001023475 | 0.011999802 |
| 405 | HSIAO_LIVER_SPECIFIC_GENES                                   | 114 | Up   | 0.001028397 | 0.012027664 |
| 406 | HOELZEL_NF1_TARGETS_UP                                       | 112 | Up   | 0.001031846 | 0.012038199 |
| 407 | REACTOME_ENDOSOMAL_VACUOLAR_PATHWAY                          | 7   | Up   | 0.001058393 | 0.012317503 |

|     | A                                                             | B          | C         | D                  | E                  |
|-----|---------------------------------------------------------------|------------|-----------|--------------------|--------------------|
| 408 | REACTOME_CHYLOMICRON_MEDIATED_LIPID_TRANSPORT                 | 9          | Up        | 0.001062057        | 0.012329778        |
| 409 | SCHAEFFER_PROSTATE_DEVELOPMENT_6HR_UP                         | 142        | Up        | 0.001073846        | 0.012436086        |
| 410 | GOTZMANN_EPITHELIAL_TO_MESENCHYMAL_TRANSITION_UP              | 62         | Up        | 0.001100137        | 0.012709403        |
| 411 | <b>GARGALOVIC_RESPONSE_TO_OXIDIZED_PHOSPHOLIPIDS_GREEN_UP</b> | <b>22</b>  | <b>Up</b> | <b>0.001107245</b> | <b>0.012736707</b> |
| 412 | REACTOME_APC_CDC20_MEDIATED_DEGRADATION_OF_NEK2A              | 21         | Down      | 1.11E-03           | 1.27E-02           |
| 413 | BIOCARTA_GLYCOLYSIS_PATHWAY                                   | 9          | Down      | 1.12E-03           | 1.28E-02           |
| 414 | REACTOME_SYNTHESIS_OF_PE                                      | 10         | Up        | 0.001124221        | 0.012861846        |
| 415 | DUTERTRE ESTRADIOL_RESPONSE_24HR_DN                           | 470        | Up        | 0.001135345        | 0.012957742        |
| 416 | FARMER_BREAST_CANCER_CLUSTER_7                                | 16         | Up        | 0.00117033         | 0.013301353        |
| 417 | ONDER_CDH1_TARGETS_1_DN                                       | 136        | Up        | 0.001171326        | 0.013301353        |
| 418 | <b>KEGG_CYTOKINE_CYTOKINE_RECEPTOR_INTERACTION</b>            | <b>104</b> | <b>Up</b> | <b>0.001174862</b> | <b>0.013301353</b> |
| 419 | CHESLER_BRAIN_QTL_TRANS                                       | 5          | Up        | 0.001176712        | 0.013301353        |
| 420 | AMIT_SERUM_RESPONSE_240_MCF10A                                | 49         | Up        | 0.001191843        | 0.01344023         |
| 421 | BAKER_HEMATOPOIESIS_STAT3_TARGETS                             | 15         | Up        | 0.0011961          | 0.013456122        |
| 422 | SCHMIDT_POR_TARGETS_IN_LIMB_BUD_DN                            | 4          | Up        | 0.001207385        | 0.013550813        |
| 423 | REACTOME_ACYL_CHAIN_REMODELLING_OF_PE                         | 13         | Up        | 0.001228311        | 0.013753009        |
| 424 | BIOCARTA_NO1_PATHWAY                                          | 24         | Up        | 0.001236013        | 0.013806528        |
| 425 | SAMOLS_TARGETS_OF_KHSV_MIRNAS_DN                              | 54         | Up        | 0.00124606         | 0.01385763         |
| 426 | CHEN_PDGF_TARGETS                                             | 17         | Up        | 0.001246454        | 0.01385763         |
| 427 | HIRSCH_CELLULAR_TRANSFORMATION_SIGNALING_UP                   | 219        | Up        | 0.00126053         | 0.013959059        |
| 428 | KUROKAWA_LIVER_CANCER_EARLY_RECURRENCE_DN                     | 7          | Up        | 0.001261485        | 0.013959059        |
| 429 | LIANG_HEMATOPOIESIS_STEM_CELL_NUMBER_S                        | 34         | Up        | 0.001266537        | 0.013971318        |
| 430 | MALL_VS_HUGE_UP                                               | 52         | Up        | 0.001270972        | 0.013971318        |

|     | A                                                  | B          | C         | D                  | E                |
|-----|----------------------------------------------------|------------|-----------|--------------------|------------------|
| 431 | MARSON_FOXP3_TARGETS_UP                            | 56         | Up        | 0.00127408         | 0.013971318      |
| 432 | DAVICIONI_RHABDOMYOSARCOMA_PAX_FOXO1_FUSION_UP     | 56         | Up        | 0.001276001        | 0.013971318      |
| 433 | DAUER_STAT3_TARGETS_DN                             | 40         | Up        | 0.001277378        | 0.013971318      |
| 434 | DORN_ADENOVIRUS_INFECTION_48HR_DN                  | 36         | Up        | 0.001324144        | 0.014421769      |
| 435 | MIKKELSEN_NPC_ICP_WITH_H3K27ME3                    | 6          | Down      | 0.001324666        | 0.014421769      |
| 436 | PID_ARF_3PATHWAY                                   | 19         | Down      | 0.001343672        | 0.014536011      |
| 437 | VANDESLUIS_COMMD1_TARGETS_GROUP_4_UP               | 14         | Up        | 0.001343858        | 0.014536011      |
| 438 | GUTIERREZ_CHRONIC_LYMPHOCYTIC_LEUKEMIA_DN          | 45         | Up        | 0.001344389        | 0.014536011      |
| 439 | CREIGHTON_ENDOCRINE_THERAPY_RESISTANCE_5           | 435        | Up        | 0.001363593        | 0.01470999       |
| 440 | KEEN_RESPONSE_TO_ROSIGLITAZONE_DN                  | 78         | Up        | 0.001396679        | 0.015032594      |
| 441 | CHIBA_RESPONSE_TO_TSA                              | 45         | Up        | 0.001420491        | 0.015254132      |
| 442 | REACTOME_PHASE1_FUNCTIONALIZATION_OF_C<br>OMPOUNDS | 26         | Up        | 0.001440899        | 0.015438202      |
| 443 | NAKAYAMA_FGF2_TARGETS                              | 24         | Up        | 0.001455859        | 0.015563202      |
| 444 | KOKKINAKIS_METHIONINE_DEPRIVATION_48HR_UP          | 110        | Up        | 0.001460888        | 0.015581707      |
| 445 | SMITH_TERT_TARGETS_UP                              | 138        | Up        | 0.001496789        | 0.015896929      |
| 446 | REACTOME_METABOLISM_OF_VITAMINS_AND_C<br>OFACTORS  | 49         | Up        | 0.001497171        | 0.015896929      |
| 447 | LINDGREN_BLADDER_CANCER_HIGH_RECURRENC<br>E        | 41         | Up        | 0.001503116        | 0.015907611      |
| 448 | FU_INTERACT_WITH_ALKBH8                            | 13         | Down      | 0.001504911        | 0.015907611      |
| 449 | NABA_COLLAGENS                                     | 37         | Up        | 0.00151929         | 0.016023758      |
| 450 | LU_AGING_BRAIN_UP                                  | 231        | Up        | 0.001528429        | 0.016084243      |
| 451 | KEGG_RNA_DEGRADATION                               | 56         | Down      | 0.001541903        | 0.016189981      |
| 452 | <b>MCBRYAN_PUBERTAL_TGFB1_TARGETS_UP</b>           | <b>159</b> | <b>Up</b> | <b>0.001562665</b> | <b>0.0163716</b> |
| 453 | CROONQUIST_NRAS_SIGNALING_DN                       | 72         | Down      | 1.58E-03           | 1.65E-02         |
| 454 | BOYLAN_MULTIPLE_MYELOMA_D_UP                       | 79         | Up        | 1.59E-03           | 1.66E-02         |

|     | A                                                           | B   | C    | D           | E           |
|-----|-------------------------------------------------------------|-----|------|-------------|-------------|
| 455 | PID_SYNDECAN_1_PATHWAY                                      | 39  | Up   | 0.001615121 | 0.016809352 |
| 456 | CORRE_MULTIPLE_MYELOMA_UP                                   | 51  | Up   | 0.001626792 | 0.016873241 |
| 457 | ZAIDI_OSTEOBLAST_TRANSCRIPTION_FACTORS                      | 9   | Up   | 0.001629969 | 0.016873241 |
| 458 | AMIT_EGF_RESPONSE_120_MCF10A                                | 38  | Up   | 0.001631973 | 0.016873241 |
| 459 | ZHOU_PANCREATIC_ENDOCRINE_PROGENITOR                        | 6   | Down | 0.001687251 | 0.017370447 |
| 460 | KOINUMA_TARGETS_OF_SMAD2_OR_SMAD3                           | 766 | Up   | 0.001687415 | 0.017370447 |
| 461 | LIANG_HEMATOPOIESIS_STEM_CELL_NUMBER_S<br>MALL_VS_HUGE_DN   | 30  | Down | 0.001696322 | 0.017396311 |
| 462 | KAMMINGA_EZH2_TARGETS                                       | 40  | Down | 0.001697291 | 0.017396311 |
| 463 | LANDIS_ERBB2_BREAST_TUMORS_65_UP                            | 21  | Up   | 0.00171497  | 0.017539468 |
| 464 | GROSS_HYPOXIA_VIA_HIF1A_ONLY                                | 7   | Up   | 0.001723153 | 0.017585098 |
| 465 | FOSTER_TOLERANT_MACROPHAGE_UP                               | 121 | Up   | 0.001727155 | 0.017587947 |
| 466 | CAIRO_HEPATOBLASTOMA_DN                                     | 177 | Up   | 0.001732592 | 0.017605371 |
| 467 | KASLER_HDAC7_TARGETS_2_DN                                   | 28  | Up   | 0.001751567 | 0.017759983 |
| 468 | PARK_APL_PATHOGENESIS_DN                                    | 33  | Up   | 0.001768747 | 0.017895226 |
| 469 | BOYLAN_MULTIPLE_MYELOMA_PCA3_UP                             | 67  | Up   | 0.001772479 | 0.017895226 |
| 470 | YANAGIHARA_ESX1_TARGETS                                     | 26  | Up   | 0.001777323 | 0.017905869 |
| 471 | WHITFIELD_CELL_CYCLE_G2_M                                   | 204 | Down | 0.001782345 | 0.017918253 |
| 472 | SASAI_RESISTANCE_TO NEOPLASTIC_TRANSFORMATION               | 45  | Up   | 0.001792482 | 0.017981907 |
| 473 | LIU_PROSTATE_CANCER_DN                                      | 389 | Up   | 0.001805689 | 0.018037749 |
| 474 | MARIADASON_RESPONSE_TO_BUTYRATE_CURC<br>UMIN_SULINDAC_TSA_2 | 8   | Up   | 0.001808274 | 0.018037749 |
| 475 | KEGG_OTHER_GLYCAN_DEGRADATION                               | 14  | Up   | 0.001809501 | 0.018037749 |
| 476 | BERTUCCI_MEDULLARY_VS_DUCTAL_BREAST_CANCER_DN               | 150 | Up   | 0.001822579 | 0.018129864 |
| 477 | YAO_TEMPORAL_RESPONSE_TO_PROGESTERONE_CLUSTER_6             | 61  | Up   | 0.001828034 | 0.018145927 |
| 478 | REACTOME_PEPTIDE_HORMONE_BIOSYNTHESIS                       | 4   | Up   | 0.001863866 | 0.018462819 |
| 479 | FULCHER_INFLAMMATORY_RESPONSE_LLECTIN_VS_LPS_UP             | 480 | Up   | 0.001898307 | 0.018731276 |
| 480 | MIKKELSEN_PLURIPOTENT_STATE_DN                              | 8   | Up   | 0.001898896 | 0.018731276 |

|     | A                                                                      | B   | C    | D           | E           |
|-----|------------------------------------------------------------------------|-----|------|-------------|-------------|
| 481 | MIZUKAMI_HYPOXIA_UP                                                    | 11  | Up   | 0.00191705  | 0.018857752 |
| 482 | AMIT_EGF_RESPONSE_40_HELA                                              | 38  | Up   | 0.001919699 | 0.018857752 |
| 483 | WORSCHER_TUMOR_EVASION_AND_TOLERANCE_NICITY_UP                         | 9   | Up   | 0.001928299 | 0.018902931 |
| 484 | BHATI_G2M_ARREST_BY_2METHOXYESTRADIOL_DN                               | 107 | Up   | 0.001948631 | 0.018951121 |
| 485 | ONGUSAHA_BRCA1_TARGETS_UP                                              | 9   | Up   | 0.001949104 | 0.018951121 |
| 486 | REACTOME_LIPOPROTEIN_METABOLISM                                        | 15  | Up   | 0.001949124 | 0.018951121 |
| 487 | YUAN_ZNF143_PARTNERS                                                   | 21  | Down | 0.001949258 | 0.018951121 |
| 488 | OHGUCHI_LIVER_HNF4A_TARGETS_DN                                         | 70  | Up   | 0.001982283 | 0.019193616 |
| 489 | DAVICIONI_PAX_FOXO1_SIGNATURE_IN_ARMS_UP                               | 51  | Up   | 0.001983389 | 0.019193616 |
| 490 | PHONG_TNF_RESPONSE_VIA_P38_COMPLETE                                    | 214 | Up   | 0.001988179 | 0.019193616 |
| 491 | CLAUS_PGR_POSITIVE_MENINGIOMA_DN                                       | 11  | Up   | 0.001990449 | 0.019193616 |
| 492 | REACTOME_PURINE_CATABOLISM                                             | 8   | Up   | 0.002109527 | 0.020284379 |
| 493 | REACTOME_ABORTIVE_ELONGATION_OF_HIV1_TRANSCRIPT_IN_THE_ABSENCE_OF_TAT  | 22  | Down | 0.002112151 | 0.020284379 |
| 494 | LEE_LIVER_CANCER_E2F1_UP                                               | 42  | Up   | 2.12E-03    | 2.03E-02    |
| 495 | PID_AVB3_OPN_PATHWAY                                                   | 30  | Up   | 2.13E-03    | 2.04E-02    |
| 496 | REACTOME_PEPTIDE_CHAIN_ELONGATION                                      | 82  | Down | 0.002135079 | 0.0203803   |
| 497 | WEST_ADRENOCORTECAL_TUMOR_UP                                           | 287 | Up   | 0.002152617 | 0.020431763 |
| 498 | KERLEY_RESPONSE_TO_CISPLATIN_UP                                        | 43  | Up   | 0.00215267  | 0.020431763 |
| 499 | CAIRO_HEPATOBLASTOMA_CLASSES_UP                                        | 596 | Down | 0.002153443 | 0.020431763 |
| 500 | REACTOME_NONSENSE_MEDIATED_DECAY_ENHANCED_BY_THE_EXON_JUNCTION_COMPLEX | 103 | Down | 0.002181968 | 0.020660915 |
| 501 | TSUNODA_CISPLATIN_RESISTANCE_UP                                        | 13  | Up   | 0.002199552 | 0.020753578 |
| 502 | HANN_RESISTANCE_TO_BCL2_INHIBITOR_UP                                   | 29  | Up   | 0.002200538 | 0.020753578 |
| 503 | ABE_VEGFA_TARGETS_30MIN                                                | 22  | Up   | 0.002220032 | 0.020895722 |
| 504 | REACTOME_GLUTATHIONE_CONJUGATION                                       | 18  | Up   | 0.002251621 | 0.021150912 |
| 505 | BUSA_SAM68_TARGETS_DN                                                  | 4   | Up   | 0.002371315 | 0.022231074 |
| 506 | PID_AURORA_A_PATHWAY                                                   | 31  | Down | 0.002377463 | 0.02224458  |
| 507 | KEGG_RIBOSOME                                                          | 83  | Down | 0.002383573 | 0.022257677 |

|     | A                                               | B   | C    | D           | E           |
|-----|-------------------------------------------------|-----|------|-------------|-------------|
| 508 | BOYLAN_MULTIPLE_MYELOMA_C_DN                    | 55  | Up   | 0.002390003 | 0.022273697 |
| 509 | AZARE_NEOPLASTIC_TRANSFORMATION_BY_STA<br>T3_UP | 98  | Up   | 0.002415577 | 0.022431023 |
| 510 | PICCALUGA_ANGIOIMMUNOBLASTIC_LYMPHOMA<br>_DN    | 124 | Up   | 0.002416379 | 0.022431023 |
| 511 | BRUINS_UVC_RESPONSE_VIA_TP53_GROUP_B            | 441 | Up   | 0.00242672  | 0.022482845 |
| 512 | BILD_HRAS_ONCOGENIC_SIGNATURE                   | 220 | Up   | 0.002447729 | 0.022633108 |
| 513 | KEGG_CITRATE_CYCLE_TCA_CYCLE                    | 28  | Up   | 0.002463842 | 0.022737603 |
| 514 | MISHRA_CARCINOMA_ASSOCIATED_FIBROBLAST<br>_UP   | 18  | Up   | 0.002513797 | 0.023153396 |
| 515 | YANG_BREAST_CANCER_ESR1_LASER_DN                | 47  | Up   | 0.002524152 | 0.023199984 |
| 516 | WHITFIELD_CELL_CYCLE_G2                         | 170 | Down | 0.002528676 | 0.023199984 |
| 517 | CAIRO_PML_TARGETS_BOUND_BY_MYC_DN               | 13  | Up   | 0.002581911 | 0.023624953 |
| 518 | OXFORD_RALA_OR_RALB_TARGETS_DN                  | 23  | Up   | 0.002584995 | 0.023624953 |
| 519 | SANA_RESPONSE_TO_IFNG_UP                        | 51  | Up   | 0.002604138 | 0.023753957 |
| 520 | GRAHAM_CML_QUIESCENT_VS_NORMAL_DIVIDI<br>NG_UP  | 35  | Up   | 0.002624379 | 0.023867959 |
| 521 | DORN_ADENOVIRUS_INFECTION_32HR_DN               | 36  | Up   | 0.002626738 | 0.023867959 |
| 522 | LEE_TARGETS_OF_PTCH1_AND_SUFU_UP                | 42  | Up   | 0.002644783 | 0.023985796 |
| 523 | VALK_AML_CLUSTER_1                              | 20  | Up   | 0.002655676 | 0.024002479 |
| 524 | MISSIAGLIA_REGULATED_BY_METHYLATION_UP          | 104 | Up   | 0.002659774 | 0.024002479 |
| 525 | HAN_SATB1_TARGETS_DN                            | 386 | Up   | 0.002664586 | 0.024002479 |
| 526 | PIONTEK_PKD1_TARGETS_UP                         | 30  | Up   | 0.002666942 | 0.024002479 |
| 527 | SCHLOSSER_SERUM_RESPONSE_AUGMENTED_B<br>Y_MYC   | 99  | Down | 0.00270969  | 0.024340843 |
| 528 | NEWMAN_ERCC6_TARGETS_DN                         | 25  | Up   | 0.002722145 | 0.024406325 |
| 529 | FURUKAWA_DUSP6_TARGETS_PCI35_DN                 | 66  | Down | 0.002773383 | 0.024812205 |
| 530 | BIOCARTA_ARAP_PATHWAY                           | 16  | Down | 0.002777917 | 0.024812205 |
| 531 | REACTOME_ACYL_CHAIN_REMODELLING_OF_PS           | 7   | Up   | 0.002820609 | 0.025145996 |
| 532 | BOQUEST_STEM_CELL_CULTURED_VS_FRESH_DN          | 13  | Up   | 0.002853958 | 0.025395391 |



|     | A                                                    | B         | C         | D                  | E                  |
|-----|------------------------------------------------------|-----------|-----------|--------------------|--------------------|
| 533 | VISALA_RESPONSE_TO_HEAT_SHOCK_AND_AGIN<br>G_UP       | 13        | Up        | 0.002868715        | 0.025478722        |
| 534 | <b>TARTE_PLASMA_CELL_VS_B_LYMPHOCYTE_UP</b>          | <b>66</b> | <b>Up</b> | <b>0.002895067</b> | <b>0.02563945</b>  |
| 535 | MARKEY_RB1_ACUTE_LOF_DN                              | 155       | Up        | 2.90E-03           | 2.56E-02           |
| 536 | COATES_MACROPHAGE_M1_VS_M2_DN                        | 59        | Up        | 2.93E-03           | 2.59E-02           |
| 537 | HENDRICKS_SMARCA4_TARGETS_DN                         | 33        | Up        | 0.002959358        | 0.026053621        |
| 538 | WAMUNYOKOLI_OVARIAN_CANCER_GRADES_1_<br>2_UP         | 126       | Up        | 0.002961015        | 0.026053621        |
| 539 | CASTELLANO_NRAS_TARGETS_UP                           | 50        | Up        | 0.002973621        | 0.026115907        |
| 540 | GARY_CD5_TARGETS_UP                                  | 439       | Up        | 0.003070437        | 0.026916168        |
| 541 | <b>CAFFAREL_RESPONSE_TO_THC_DN</b>                   | <b>29</b> | <b>Up</b> | <b>0.003088885</b> | <b>0.027027742</b> |
| 542 | AMUNDSON_POOR_SURVIVAL_AFTER_GAMMA_<br>RADIATION_8G  | 85        | Up        | 0.003119925        | 0.027214471        |
| 543 | FRIDMAN_SENESCENCE_UP                                | 68        | Up        | 0.003123402        | 0.027214471        |
| 544 | SESTO_RESPONSE_TO_UV_C7                              | 64        | Up        | 0.003127504        | 0.027214471        |
| 545 | WIERENGA_STAT5A_TARGETS_UP                           | 166       | Up        | 0.003133941        | 0.027220351        |
| 546 | PID_INTEGRIN_A9B1_PATHWAY                            | 20        | Up        | 0.003144035        | 0.027257921        |
| 547 | SENESE_HDAC1_TARGETS_UP                              | 400       | Up        | 0.003154149        | 0.027267396        |
| 548 | REACTOME_INSULIN_RECEPTOR_RECYCLING                  | 19        | Up        | 0.003159931        | 0.027267396        |
| 549 | BAELDE_DIABETIC_NEPHROPATHY_DN                       | 399       | Up        | 0.003162441        | 0.027267396        |
| 550 | REACTOME_POST_CHAPERONIN_TUBULIN_FOLDI<br>NG_PATHWAY | 15        | Up        | 0.003262229        | 0.028076565        |
| 551 | WOO_LIVER_CANCER_RECURRENCE_DN                       | 51        | Up        | 0.00327619         | 0.028145452        |
| 552 | BAKER_HEMATOPOESIS_STAT5_TARGETS                     | 7         | Up        | 0.00330817         | 0.028275544        |
| 553 | KOBAYASHI_EGFR_SIGNALING_24HR_UP                     | 86        | Up        | 0.003313265        | 0.028275544        |
| 554 | ZHU_CMV_8_HR_DN                                      | 47        | Up        | 0.003314731        | 0.028275544        |
| 555 | RIGGINS_TAMOXIFEN_RESISTANCE_DN                      | 204       | Up        | 0.003324567        | 0.028275544        |
| 556 | LIU_TARGETS_OF_VMYB_VS_CMYB_DN                       | 29        | Up        | 0.003326816        | 0.028275544        |
| 557 | SMID_BREAST_CANCER_LUMINAL_B_DN                      | 341       | Up        | 0.003327239        | 0.028275544        |
| 558 | QI_PLASMACYTOMA_UP                                   | 179       | Up        | 0.003363035        | 0.028528442        |
| 559 | MONTERO_THYROID_CANCER_POOR_SURVIVAL_<br>UP          | 12        | Down      | 0.003372316        | 0.028555904        |

|     | A                                                                                                                                    | B        | C         | D                  | E                  |
|-----|--------------------------------------------------------------------------------------------------------------------------------------|----------|-----------|--------------------|--------------------|
| 560 | MARIADASON_RESPONSE_TO_CURCUMIN_SULIN_DAC_7                                                                                          | 16       | Down      | 0.003393487        | 0.028683767        |
| 561 | HOFMANN_MYELODYSPLASTIC_SYNDROM_LOW_RISK_DN                                                                                          | 26       | Up        | 0.003462788        | 0.029187652        |
| 562 | HOQUE_METHYLATED_IN_CANCER                                                                                                           | 37       | Up        | 0.003465455        | 0.029187652        |
| 563 | MORI_LARGE_PRE_BII_LYMPHOCYTE_DN                                                                                                     | 42       | Up        | 0.003494193        | 0.029377332        |
| 564 | VANHARANTA_UTERINE_FIBROID_DN                                                                                                        | 54       | Up        | 0.003520796        | 0.02954842         |
| 565 | MAINA_VHL_TARGETS_UP                                                                                                                 | 9        | Up        | 0.003529614        | 0.029569901        |
| 566 | PAPASPYRIDONOS_UNSTABLE_ATEROSCLEROTIC_PLAQUE_UP                                                                                     | 36       | Up        | 0.00354244         | 0.029624828        |
| 567 | SENESE_HDAC3_TARGETS_DN                                                                                                              | 494      | Up        | 0.003566312        | 0.029771771        |
| 568 | LEIN_OLIGODENDROCYTE_MARKERS                                                                                                         | 60       | Up        | 0.003575169        | 0.029777418        |
| 569 | OKAMOTO_LIVER_CANCER_MULTICENTRIC_OCCURRENCE_UP                                                                                      | 18       | Up        | 0.003579592        | 0.029777418        |
| 570 | BOSCO_ALLERGEN_INDUCED_TH2_ASSOCIATED_MODULE                                                                                         | 109      | Up        | 0.003613292        | 0.030004928        |
| 571 | REACTOME_TRANSFERRIN_ENDOCYTOSIS_AND_RECYCLING                                                                                       | 21       | Up        | 0.003628442        | 0.030068071        |
| 572 | REACTOME_ACYL_CHAIN_REMODELLING_OF_PC                                                                                                | 14       | Up        | 0.003633623        | 0.030068071        |
| 573 | PEPPER_CHRONIC_LYMPHOCYTIC_LEUKEMIA_UP                                                                                               | 18       | Up        | 0.003669688        | 0.030313419        |
| 574 | LUI_THYROID_CANCER_PAX8_PPARG_UP                                                                                                     | 41       | Up        | 0.003725628        | 0.030721805        |
| 575 | <b>REACTOME_ACYL_CHAIN_REMODELLING_OF_PI</b>                                                                                         | <b>7</b> | <b>Up</b> | <b>0.003778995</b> | <b>0.031107577</b> |
| 576 | OXFORD_RALB_TARGETS_UP                                                                                                               | 8        | Up        | 3.84E-03           | 3.16E-02           |
| 577 | MENSE_HYPOXIA_UP                                                                                                                     | 96       | Up        | 3.85E-03           | 3.16E-02           |
| 578 | REACTOME_INHIBITION_OF_THE_PROTEOLYTIC_ACTIVITY_OF_APC_C_REQUIRED_FOR_THE_ONSET_OF_ANAPHASE_BY_MITOTIC_SPINDLE_CHECKPOINT_COMPONENTS | 18       | Down      | 0.003858475        | 0.031557451        |
| 579 | REACTOME_ANTIGEN_PRESENTATION_FOLDING_ASSEMBLY_AND_PEPTIDE_LOADING_OF_CLASS_I_MHC                                                    | 20       | Up        | 0.003860361        | 0.031557451        |
| 580 | MASSARWEH_TAMOXIFEN_RESISTANCE_UP                                                                                                    | 507      | Up        | 0.003952757        | 0.032227568        |

|     | A                                                                        | B   | C    | D           | E           |
|-----|--------------------------------------------------------------------------|-----|------|-------------|-------------|
| 581 | NIELSEN_LEIOMYOSARCOMA_DN                                                | 16  | Up   | 0.003955977 | 0.032227568 |
| 582 | MARIADASON_RESPONSE_TO_CURCUMIN_SULIN<br>DAC_5                           | 22  | Up   | 0.003972743 | 0.032308453 |
| 583 | PID_CASPASE_PATHWAY                                                      | 43  | Up   | 0.003987646 | 0.03237393  |
| 584 | XU_HGF_SIGNALING_NOT_VIA_AKT1_6HR                                        | 25  | Up   | 0.004036932 | 0.032689444 |
| 585 | REACTOME_SRP_DEPENDENT_COTRANSLATIONA<br>L_PROTEIN_TARGETING_TO_MEMBRANE | 105 | Down | 0.004040346 | 0.032689444 |
| 586 | CROONQUIST_IL6_DEPRIVATION_DN                                            | 97  | Down | 0.004051891 | 0.032726813 |
| 587 | KIM_WT1_TARGETS_12HR_UP                                                  | 147 | Up   | 0.004100642 | 0.033064052 |
| 588 | GRAHAM_CML_QUIESCENT_VS_CML_DIVIDING_D<br>N                              | 5   | Down | 0.004115197 | 0.033124879 |
| 589 | PROVENZANI_METASTASIS_DN                                                 | 124 | Up   | 0.00417321  | 0.03353061  |
| 590 | REACTOME_MRNA_SPLICING_MINOR_PATHWAY                                     | 41  | Down | 0.004179795 | 0.03353061  |
| 591 | VETTER_TARGETS_OF_PRKCA_AND_ETS1_DN                                      | 11  | Up   | 0.004190373 | 0.033558492 |
| 592 | REACTOME_PLATELET_ACTIVATION_SIGNALING_<br>AND_AGGREGATION               | 143 | Up   | 0.004201661 | 0.033591958 |
| 593 | REACTOME_SLC_MEDIATED_TRANSMEMBRANE_<br>TRANSPORT                        | 162 | Up   | 0.004244689 | 0.033843118 |
| 594 | BROWNE_HCMV_INFECTION_24HR_DN                                            | 132 | Up   | 0.004247401 | 0.033843118 |
| 595 | KOKKINAKIS_METHIONINE_DEPRIVATION_96HR_<br>UP                            | 104 | Up   | 0.004265407 | 0.033924842 |
| 596 | YANG_MUC2_TARGETS_DUODENUM_6MO_DN                                        | 13  | Up   | 0.004272017 | 0.033924842 |
| 597 | STANHILL_HRAS_TRANSFROMATION_UP                                          | 8   | Up   | 0.004287514 | 0.033990782 |
| 598 | LEE_LIVER_CANCER_E2F1_DN                                                 | 35  | Up   | 0.004303262 | 0.034058485 |
| 599 | KEGG_PORPHYRIN_AND_CHLOROPHYLL_METABO<br>LISM                            | 21  | Up   | 0.004311615 | 0.034067528 |
| 600 | RICKMAN_HEAD_AND_NECK_CANCER_F                                           | 30  | Up   | 0.004326653 | 0.034129277 |
| 601 | LIEN_BREAST_CARCINOMA_METAPLASTIC_VS_D<br>UCTAL_UP                       | 65  | Up   | 0.004350079 | 0.034256874 |
| 602 | ZHAN_MULTIPLE_MYELOMA_HP_DN                                              | 43  | Up   | 0.004365095 | 0.034317928 |

|     | A                                                  | B         | C         | D                  | E                  |
|-----|----------------------------------------------------|-----------|-----------|--------------------|--------------------|
| 603 | WINNEPENINCKX_MELANOMA_METASTASIS_UP               | 158       | Down      | 0.004375599        | 0.034343367        |
| 604 | VERHAAK_GLIOMASTOMA_PRONEURAL                      | 155       | Down      | 0.004416156        | 0.03460421         |
| 605 | OSADA_ASCL1_TARGETS_DN                             | 18        | Up        | 0.00456216         | 0.03568908         |
| 606 | NAKAMURA_ADIPOGENESIS_EARLY_UP                     | 54        | Up        | 0.004581853        | 0.035783893        |
| 607 | GERHOLD_ADIPOGENESIS_DN                            | 58        | Up        | 0.004633425        | 0.036126953        |
| 608 | ROSS_LEUKEMIA_WITH_MLL_FUSIONS                     | 62        | Up        | 0.004666268        | 0.036323093        |
| 609 | WU_APOPTOSIS_BY_CDKN1A_VIA_TP53                    | 54        | Down      | 0.004703956        | 0.036522534        |
| 610 | KEGG_GLYCATHIONE_METABOLISM                        | 40        | Up        | 0.004707349        | 0.036522534        |
| 611 | DAVIES_MULTIPLE_MYELOMA_VS_MGUS_DN                 | 17        | Up        | 0.004785857        | 0.037070781        |
| 612 | GAZDA_DIAMOND_BLACKFAN_ANEMIA_PROGENITOR_UP        | 34        | Up        | 0.004800911        | 0.037126518        |
| 613 | ACEVEDO_NORMAL_TISSUE_ADJACENT_TO_LIVER_TUMOR_DN   | 308       | Up        | 0.004851869        | 0.037428652        |
| 614 | DOUGLAS_BMI1_TARGETS_DN                            | 284       | Up        | 0.004855823        | 0.037428652        |
| 615 | FURUKAWA_DUSP6_TARGETS_PC135_UP                    | 46        | Up        | 0.004874892        | 0.037514435        |
| 616 | <b>SHIN_B_CELL_LYMPHOMA_CLUSTER_5</b>              | <b>8</b>  | <b>Up</b> | <b>0.004889358</b> | <b>0.037564577</b> |
| 617 | ZWANG_CLASS_1_TRANSIENTLY_INDUCED_BY_EGF           | 415       | Up        | 4.91E-03           | 3.77E-02           |
| 618 | CAIRO_LIVER_DEVELOPMENT_DN                         | 140       | Up        | 4.94E-03           | 3.78E-02           |
| 619 | LAU_APOPTOSIS_CDKN2A_DN                            | 5         | Up        | 0.004973298        | 0.038024           |
| 620 | RAY_TARGETS_OF_P210_BCR_ABL_FUSION_UP              | 13        | Up        | 0.005006782        | 0.038205851        |
| 621 | ACEVEDO_LIVER_CANCER_DN                            | 430       | Up        | 0.005013255        | 0.038205851        |
| 622 | BURTON_ADIPOGENESIS_3                              | 98        | Down      | 0.00505018         | 0.03842528         |
| 623 | <b>WANG_ESOPHAGUS_CANCER_VS_NORMAL_UP</b>          | <b>87</b> | <b>Up</b> | <b>0.005128653</b> | <b>0.038959621</b> |
| 624 | PARK_TRETINOIN_RESPONSE                            | 5         | Up        | 0.005269814        | 0.03996769         |
| 625 | HAHTOLA_MYCOSIS_FUNGOIDES_CD4_UP                   | 48        | Up        | 0.005334862        | 0.040396189        |
| 626 | HINATA_NFKB_TARGETS_KERATINOCYTE_UP                | 65        | Up        | 0.005358131        | 0.040507468        |
| 627 | REACTOME_FORMATION_OF_THE_HIV1_EARLY_ENTRY_COMPLEX | 30        | Down      | 0.005480972        | 0.041369956        |
| 628 | CAIRO_HEPATOBLASTOMA_POOR_SURVIVAL                 | 10        | Down      | 0.005566886        | 0.041951415        |

|     | A                                                               | B   | C    | D           | E           |
|-----|-----------------------------------------------------------------|-----|------|-------------|-------------|
| 629 | FARMER_BREAST_CANCER_APOCRINE_VS_BASAL                          | 283 | Up   | 0.005619105 | 0.042277502 |
| 630 | KEGG_EPITHELIAL_CELL_SIGNALING_IN_HELICOBACTER_PYLORI_INFECTION | 61  | Up   | 0.005635949 | 0.042314228 |
| 631 | ELVIDGE_HYPOXIA_BY_DMOG_UP                                      | 122 | Up   | 0.005641897 | 0.042314228 |
| 632 | SUNG_METASTASIS_STROMA_DN                                       | 49  | Up   | 0.005682672 | 0.042552499 |
| 633 | GINESTIER_BREAST_CANCER_20Q13_AMPLIFICATION_DN                  | 168 | Down | 0.005763459 | 0.043089152 |
| 634 | REACTOME_PHOSPHOLIPID_METABOLISM                                | 166 | Up   | 0.005793558 | 0.043197824 |
| 635 | GAUSSMANN_MLL_AF4_FUSION_TARGETS_E_UP                           | 81  | Up   | 0.00579628  | 0.043197824 |
| 636 | JOHNSTONE_PARVB_TARGETS_1_UP                                    | 6   | Up   | 0.005814228 | 0.043202265 |
| 637 | MONNIER_POSTRADIATION_TUMOR_ESCAPE_DN                           | 341 | Up   | 0.005815162 | 0.043202265 |
| 638 | AMIT_EGF_RESPONSE_40_MCF10A                                     | 19  | Up   | 0.005859126 | 0.043460547 |
| 639 | KEGG_AXON_GUIDANCE                                              | 125 | Down | 0.005964159 | 0.044170302 |
| 640 | CHASSOT_SKIN_WOUND                                              | 9   | Up   | 0.006013761 | 0.044422739 |
| 641 | KEGG_METABOLISM_OF_XENOBIOTICS_BY_CYTOCHROME_P450               | 26  | Up   | 0.006017048 | 0.044422739 |
| 642 | HWANG_PROSTATE_CANCER_MARKERS                                   | 23  | Up   | 0.006120496 | 0.045115984 |
| 643 | PAPASPYRIDONOS_UNSTABLE_ATHEROSCLEROTIC_PLAQUE_DN               | 37  | Up   | 0.006135769 | 0.045158113 |
| 644 | FLECHNER_PBL_KIDNEY_TRANSPLANT_OK_VS_DONOR_DN                   | 36  | Up   | 0.006159526 | 0.045262458 |
| 645 | PID_AR_TF_PATHWAY                                               | 45  | Down | 0.006287621 | 0.046132002 |
| 646 | HOLLMANN_APOPTOSIS_VIA_CD40_DN                                  | 239 | Up   | 0.00630812  | 0.046210646 |
| 647 | ONO_AML1_TARGETS_UP                                             | 12  | Up   | 0.006320838 | 0.046231141 |
| 648 | REACTOME_TRANSMEMBRANE_TRANSPORT_OF_SMALL_MOLECULES             | 281 | Up   | 0.006330486 | 0.046231141 |
| 649 | BIOCARTA_CARDIACEGF_PATHWAY                                     | 16  | Up   | 0.006355515 | 0.046342294 |
| 650 | CHUANG_OXIDATIVE_STRESS_RESPONSE_UP                             | 26  | Up   | 0.006408537 | 0.046656911 |
| 651 | ISHIDA_TARGETS_OF_SYT_S SX_FUSIONS                              | 5   | Up   | 0.006437433 | 0.046795182 |

|     | A                                                    | B          | C         | D                  | E                  |
|-----|------------------------------------------------------|------------|-----------|--------------------|--------------------|
| 652 | REACTOME_METABOLISM_OF_AMINO_ACIDS_AND_DERIVATIVES   | 149        | Up        | 0.006541114        | 0.047475827        |
| 653 | BECKER_TAMOXIFEN_RESISTANCE_UP                       | 40         | Up        | 0.00655705         | 0.047518496        |
| 654 | REACTOME_TRANS_GOLGI_NETWORK_VESICLE_BUDDING         | 59         | Up        | 0.006601639        | 0.047768368        |
| 655 | TAKEDA_TARGETS_OF_NUP98_HOXA9_FUSION_10D_DN          | 80         | Up        | 0.006633868        | 0.047928175        |
| 656 | HEIDENBLAD_AMPLIFIED_IN_BONE_CANCER                  | 5          | Up        | 0.00664862         | 0.047961422        |
| 657 | <b>JIANG_HYPOXIA_NORMAL</b>                          | <b>292</b> | <b>Up</b> | <b>0.006693907</b> | <b>0.048214039</b> |
| 658 | HANN_RESISTANCE_TO_BCL2_INHIBITOR_DN                 | 34         | Up        | 6.71E-03           | 4.82E-02           |
| 659 | ROETH_TERT_TARGETS_UP                                | 8          | Up        | 6.71E-03           | 4.82E-02           |
| 660 | PHONG_TNF_RESPONSE_VIA_P38_PARTIAL                   | 137        | Up        | 0.006743093        | 0.04834767         |
| 661 | FARMER_BREAST_CANCER_CLUSTER_6                       | 12         | Up        | 0.006776722        | 0.048515171        |
| 662 | REACTOME_PERK_REGULATED_GENE_EXPRESSION              | 25         | Up        | 0.006799027        | 0.048601214        |
| 663 | LINDGREN_BLADDER_CANCER_CLUSTER_2A_DN                | 129        | Up        | 0.006814118        | 0.048635513        |
| 664 | <b>COLIN_PILOCYTIC_ASTROCYTOMA_VS_GLIOMASTOMA_UP</b> | <b>30</b>  | <b>Up</b> | <b>0.006869784</b> | <b>0.048751806</b> |
| 665 | REACTOME_TRANSLATION                                 | 141        | Down      | 0.00686998         | 0.048751806        |
| 666 | TSAI_RESPONSE_TO_RADIATION_THERAPY                   | 23         | Up        | 0.006870599        | 0.048751806        |
| 667 | LINDGREN_BLADDER_CANCER_CLUSTER_2B                   | 301        | Up        | 0.006871683        | 0.048751806        |
| 668 | REACTOME_REGULATION_OF_MITOTIC_CELL_CYCLE            | 76         | Down      | 0.006899806        | 0.048877936        |
| 669 | SHI_SPARC_TARGETS_UP                                 | 22         | Up        | 0.007002187        | 0.049526369        |
| 670 | NOUSHMEHR_GBM_SILENCED_BY_METHYLATION                | 38         | Up        | 0.007012305        | 0.049526369        |
| 671 | CAFFAREL_RESPONSE_TO_THC_8HR_5_DN                    | 11         | Up        | 0.007124636        | 0.050244634        |
| 672 | BROWNE_HCMV_INFECTION_20HR_DN                        | 85         | Up        | 0.007149425        | 0.050268467        |
| 673 | CHIANG_LIVER_CANCER_SUBCLASS_CTNNB1_DN               | 126        | Up        | 0.007150259        | 0.050268467        |
| 674 | REACTOME_INFLUENZA_LIFE_CYCLE                        | 131        | Down      | 0.007168573        | 0.050268467        |

|     | A                                                     | B         | C         | D                  | E                  |
|-----|-------------------------------------------------------|-----------|-----------|--------------------|--------------------|
| 675 | KEGG_COMPLEMENT_AND_COAGULATION_CASC<br>ADES          | 27        | Up        | 0.007170571        | 0.050268467        |
| 676 | CROSBY_E2F4_TARGETS                                   | 6         | Down      | 0.007230994        | 0.050543543        |
| 677 | TAVOR_CEBPA_TARGETS_UP                                | 34        | Up        | 0.00724143         | 0.050543543        |
| 678 | REACTOME_MUSCLE_CONTRACTION                           | 37        | Up        | 0.007252003        | 0.050543543        |
| 679 | REACTOME_METABOLISM_OF_RNA                            | 250       | Down      | 0.007252597        | 0.050543543        |
| 680 | BUSA_SAM68_TARGETS_UP                                 | 5         | Up        | 0.00726706         | 0.050569744        |
| 681 | ELVIDGE_HYPOXIA_UP                                    | 162       | Up        | 0.007308485        | 0.050783225        |
| 682 | PARK_TRETINOIN_RESPONSE_AND_PML_RARA_F<br>USION       | 21        | Up        | 0.007326227        | 0.050831754        |
| 683 | COATES_MACROPHAGE_M1_VS_M2_UP                         | 69        | Up        | 0.007369166        | 0.051054704        |
| 684 | PUJANA_BREAST_CANCER_WITH_BRCA1_MUTAT<br>ED_UP        | 54        | Down      | 0.007380107        | 0.051055643        |
| 685 | SESTO_RESPONSE_TO_UV_C6                               | 39        | Up        | 0.007470828        | 0.051607691        |
| 686 | ZHU_CMV_ALL_UP                                        | 106       | Up        | 0.007499136        | 0.051727616        |
| 687 | WIELAND_UP_BY_HBV_INFECTION                           | 70        | Up        | 0.007600648        | 0.0523514          |
| 688 | CUI_TCF21_TARGETS_2_DN                                | 742       | Up        | 0.00765098         | 0.052621367        |
| 689 | REACTOME_METABOLISM_OF_MRNA                           | 205       | Down      | 0.007688585        | 0.052803143        |
| 690 | GROSS_HYPOXIA_VIA_ELK3_ONLY_DN                        | 41        | Down      | 0.007875883        | 0.054008812        |
| 691 | REACTOME_DEADENYLATION_DEPENDENT_MRN<br>A_DECAY       | 44        | Down      | 0.00789295         | 0.054008812        |
| 692 | WUNDER_INFLAMMATORY_RESPONSE_AND_CH<br>OLESTEROL_UP   | 34        | Up        | 0.007898431        | 0.054008812        |
| 693 | REACTOME_NRIF_SIGNALS_CELL_DEATH_FROM_<br>THE_NUCLEUS | 13        | Up        | 0.007999331        | 0.054619708        |
| 694 | ZHANG_RESPONSE_TO_IKK_INHIBITOR_AND_TNF<br>_UP        | 173       | Up        | 0.008126676        | 0.05539195         |
| 695 | FARMER_BREAST_CANCER_CLUSTER_3                        | 14        | Up        | 0.008135876        | 0.05539195         |
| 696 | REACTOME_REGULATORY_RNA_PATHWAYS                      | 24        | Down      | 0.008168282        | 0.055405442        |
| 697 | KEGG_PROGESTERONE_MEDIATED_OOCYTE_MA<br>TURATION      | 74        | Down      | 0.008172519        | 0.055405442        |
| 698 | <b>CERVERA_SDHB_TARGETS_1_UP</b>                      | <b>84</b> | <b>Up</b> | <b>0.008173036</b> | <b>0.055405442</b> |

|     | A                                                             | B   | C    | D           | E           |
|-----|---------------------------------------------------------------|-----|------|-------------|-------------|
| 699 | GARGALOVIC_RESPONSE_TO_OXIDIZED_PHOSPH<br>OLIPIDS_BLUE_UP     | 125 | Up   | 8.19E-03    | 5.55E-02    |
| 700 | WINZEN_DEGRADED_VIA_KHSRP                                     | 78  | Up   | 8.32E-03    | 5.62E-02    |
| 701 | KEGG_FOCAL_ADHESION                                           | 173 | Up   | 0.008341389 | 0.056304377 |
| 702 | LABBE_TARGETS_OF_TGFB1_AND_WNT3A_DN                           | 75  | Up   | 0.008376856 | 0.056463118 |
| 703 | KEGG_GLYCOSAMINOGLYCAN_DEGRADATION                            | 18  | Up   | 0.008509287 | 0.057274048 |
| 704 | HARRIS_HYPOXIA                                                | 65  | Up   | 0.008604943 | 0.057835497 |
| 705 | REACTOME_LIPID_DIGESTION_MOBILIZATION_AN<br>D_TRANSPORT       | 23  | Up   | 0.008665583 | 0.058121229 |
| 706 | TORCHIA_TARGETS_OF_EWSR1_FLI1_FUSION_T<br>OP20_DN             | 14  | Up   | 0.00867896  | 0.058121229 |
| 707 | DORN_ADENOVIRUS_INFECTION_24HR_DN                             | 40  | Up   | 0.00868794  | 0.058121229 |
| 708 | KEGG_O_GLYCAN_BIOSYNTHESIS                                    | 21  | Up   | 0.008696658 | 0.058121229 |
| 709 | KRIGE_RESPONSE_TO_TOSEDOSTAT_6HR_UP                           | 858 | Up   | 0.008814279 | 0.058824111 |
| 710 | ZHONG_SECRETOME_OF_LUNG_CANCER_AND_FI<br>BROBLAST             | 115 | Up   | 0.008848801 | 0.058971208 |
| 711 | SMID_BREAST_CANCER_RELAPSE_IN_LIVER_DN                        | 8   | Up   | 0.008970676 | 0.059699217 |
| 712 | ENGELMANN_CANCER_PROGENITORS_UP                               | 41  | Up   | 0.008989883 | 0.059728024 |
| 713 | FLECHNER_BIOPSY_KIDNEY_TRANSPLANT_REJECT<br>ED_VS_OK_UP       | 52  | Up   | 0.009006905 | 0.059728024 |
| 714 | GENTILE_UV_RESPONSE_CLUSTER_D5                                | 35  | Up   | 0.009023958 | 0.059728024 |
| 715 | WEIGEL_OXIDATIVE_STRESS_BY_TBH_AND_H2O2                       | 31  | Up   | 0.009035256 | 0.059728024 |
| 716 | ROZANOV_MMP14_TARGETS_SUBSET                                  | 29  | Up   | 0.009038209 | 0.059728024 |
| 717 | YAO_TEMPORAL_RESPONSE_TO_PROGESTERON<br>E_CLUSTER_2           | 67  | Down | 0.009100539 | 0.060055929 |
| 718 | AMIT_SERUM_RESPONSE_120_MCF10A                                | 59  | Up   | 0.00912698  | 0.060146419 |
| 719 | RANKIN_ANGIOGENIC_TARGETS_OF_VHL_HIF2A_<br>DN                 | 6   | Up   | 0.009158664 | 0.060271151 |
| 720 | DASU_IL6_SIGNALING_SCAR_DN                                    | 15  | Up   | 0.009310489 | 0.061185065 |
| 721 | REACTOME_FACILITATIVE_NA_INDEPENDENT_GL<br>UCOSE_TRANSPORTERS | 8   | Up   | 0.009328511 | 0.061218354 |



|     | A                                                                         | B         | C         | D                 | E                  |
|-----|---------------------------------------------------------------------------|-----------|-----------|-------------------|--------------------|
| 722 | KEGG_ADIPOCYTOKINE_SIGNALING_PATHWAY                                      | 54        | Up        | 0.009360611       | 0.061343811        |
| 723 | TRAYNOR_RETT_SYNDROM_UP                                                   | 31        | Up        | 0.009377192       | 0.061367357        |
| 724 | PID_HIF2PATHWAY                                                           | 33        | Up        | 0.009400484       | 0.061434698        |
| 725 | GRAHAM_CML_DIVIDING_VS_NORMAL_QUIESCENT_UP                                | 161       | Down      | 0.009435662       | 0.061579425        |
| 726 | CHANDRAN_METASTASIS_TOP50_UP                                              | 36        | Down      | 0.009476961       | 0.06169568         |
| 727 | LE_EGR2_TARGETS_UP                                                        | 106       | Down      | 0.00947959        | 0.06169568         |
| 728 | WU_CELL_MIGRATION                                                         | 155       | Up        | 0.009503423       | 0.061765713        |
| 729 | REACTOME_LATENT_INFECTION_OF_HOMO_SAPIENS_WITH_MYCOBACTERIUM_TUBERCULOSIS | 22        | Up        | 0.009672407       | 0.06277764         |
| 730 | YANG_MUC2_TARGETS_DUODENUM_3MO_DN                                         | 15        | Up        | 0.009740909       | 0.06313552         |
| 731 | HOOI_ST7_TARGETS_UP                                                       | 79        | Up        | 0.009768045       | 0.063224674        |
| 732 | REACTOME_NOTCH1_INTRACELLULAR_DOMAIN_REGULATES_TRANSCRIPTION              | 42        | Down      | 0.009866779       | 0.063776376        |
| 733 | LIM_MAMMARY_STEM_CELL_UP                                                  | 426       | Up        | 0.009927637       | 0.064025759        |
| 734 | INGRAM_SHH_TARGETS_UP                                                     | 94        | Up        | 0.009932462       | 0.064025759        |
| 735 | SCHAEFFER_PROSTATE_DEVELOPMENT_AND_CANCER_BOX1_UP                         | 13        | Up        | 0.010002993       | 0.064355325        |
| 736 | WALLACE_PROSTATE_CANCER_RACE_UP                                           | 158       | Up        | 0.010010828       | 0.064355325        |
| 737 | RASHI_RESPONSE_TO_IONIZING_RADIATION_2                                    | 113       | Up        | 0.010041881       | 0.064407643        |
| 738 | BIOCARTA_DEATH_PATHWAY                                                    | 29        | Up        | 0.010046229       | 0.064407643        |
| 739 | <b>BASSO_HAIRY_CELL_LEUKEMIA_DN</b>                                       | <b>69</b> | <b>Up</b> | <b>0.01021024</b> | <b>0.065370441</b> |
| 740 | HOFFMANN_IMMATURE_TO_MATURE_B_LYMPHOCYTE_UP                               | 33        | Up        | 1.03E-02          | 6.56E-02           |
| 741 | KIM_GLIS2_TARGETS_UP                                                      | 60        | Up        | 1.03E-02          | 6.57E-02           |
| 742 | BOYLAN_MULTIPLE_MYELOMA_C_UP                                              | 42        | Down      | 0.010310525       | 0.065745251        |
| 743 | SCHUETZ_BREAST_CANCER_DUCTAL_INVASIVE_DN                                  | 72        | Up        | 0.010349906       | 0.065907422        |
| 744 | SERVITJA_ISLET_HNF1A_TARGETS_UP                                           | 124       | Up        | 0.010438424       | 0.066381634        |
| 745 | GENTILE_UV_RESPONSE_CLUSTER_D1                                            | 18        | Up        | 0.010511455       | 0.066756216        |
| 746 | LY_AGING_MIDDLE_UP                                                        | 4         | Down      | 0.010581137       | 0.067108551        |

|     | A                                                                                                              | B   | C    | D           | E           |
|-----|----------------------------------------------------------------------------------------------------------------|-----|------|-------------|-------------|
| 747 | REACTOME_PPARA_ACTIVATES_GENE_EXPRESSION                                                                       | 90  | Up   | 0.01059619  | 0.06711394  |
| 748 | REACTOME_CYCLIN_A_B1_ASSOCIATED_EVENTS_DURING_G2_M_TRANSITION                                                  | 15  | Down | 0.010665002 | 0.067459352 |
| 749 | DORSAM_HOXA9_TARGETS_DN                                                                                        | 28  | Up   | 0.010705789 | 0.067626809 |
| 750 | HINATA_NFKB_TARGETS_FIBROBLAST_UP                                                                              | 66  | Up   | 0.010837212 | 0.068365592 |
| 751 | TONKS_TARGETS_OF_RUNX1_RUNX1T1_FUSION_HSC_UP                                                                   | 151 | Up   | 0.010933516 | 0.068881151 |
| 752 | MAYBURD_RESPONSE_TO_L663536_UP                                                                                 | 27  | Up   | 0.010976285 | 0.06898835  |
| 753 | ALCALAY_AML_BY_NPM1_LOCALIZATION_UP                                                                            | 102 | Up   | 0.010979733 | 0.06898835  |
| 754 | MILI_PSEUDOPODIA                                                                                               | 42  | Up   | 0.010995772 | 0.068997373 |
| 755 | LEE_LIVER_CANCER_DENA_DN                                                                                       | 41  | Up   | 0.01101095  | 0.069000981 |
| 756 | JACKSON_DNMT1_TARGETS_DN                                                                                       | 22  | Up   | 0.011109238 | 0.069524701 |
| 757 | PID_FRA_PATHWAY                                                                                                | 28  | Up   | 0.011129793 | 0.069561209 |
| 758 | PID_MYC_REPRESS_PATHWAY                                                                                        | 55  | Up   | 0.011238228 | 0.070146138 |
| 759 | HESS_TARGETS_OF_HOXA9_AND_MEIS1_DN                                                                             | 46  | Up   | 0.011255983 | 0.070164275 |
| 760 | REACTOME_ACTIVATION_OF_THE_MRNA_UPON_BINDING_OF_THE_CAP_BINDING_COMPLEX_AND_EIFS_AND_SUBSEQUENT_BINDING_TO_43S | 55  | Down | 0.011382917 | 0.070862031 |
| 761 | TAKAO_RESPONSE_TO_UVB_RADIATION_DN                                                                             | 93  | Up   | 0.011480955 | 0.071378305 |
| 762 | KLEIN_PRIMARY EFFUSION_LYMPHOMA_DN                                                                             | 47  | Up   | 0.011579385 | 0.071895657 |
| 763 | HECKER_IFNB1_TARGETS                                                                                           | 43  | Up   | 0.011811175 | 0.07322362  |
| 764 | FRASOR_TAMOXIFEN_RESPONSE_UP                                                                                   | 45  | Up   | 0.011824259 | 0.07322362  |
| 765 | TSENG_ADIPOGENIC_POTENTIAL_UP                                                                                  | 26  | Up   | 0.011851511 | 0.073296322 |
| 766 | GAVIN_FOXP3_TARGETS_CLUSTER_P4                                                                                 | 74  | Up   | 0.011874335 | 0.073341481 |
| 767 | MARSON_FOXP3_TARGETS_STIMULATED_UP                                                                             | 16  | Up   | 0.011889919 | 0.073341864 |
| 768 | CHIANG_LIVER_CANCER_SUBCLASS_POLYSOMY7_DN                                                                      | 20  | Up   | 0.011925378 | 0.073464679 |
| 769 | REACTOME_SIGNALING_BY_FGFR_MUTANTS                                                                             | 33  | Down | 0.011980329 | 0.073707104 |
| 770 | IVANOVSKA_MIR106B_TARGETS                                                                                      | 89  | Up   | 0.012020594 | 0.073858654 |

|     | A                                                    | B         | C         | D                  | E                  |
|-----|------------------------------------------------------|-----------|-----------|--------------------|--------------------|
| 771 | GAUSSMANN_MLL_AF4_FUSION_TARGETS_E_D<br>N            | 18        | Up        | 0.012047012        | 0.073924843        |
| 772 | HIRSCH_CELLULAR_TRANSFORMATION_SIGNATU<br>RE_DN      | 95        | Up        | 0.01208519         | 0.074062932        |
| 773 | KAPOSI_LIVER_CANCER_MET_UP                           | 17        | Up        | 0.012176992        | 0.074528868        |
| 774 | NAKAMURA_CANCER_MICROENVIRONMENT_DN                  | 45        | Up        | 0.012212436        | 0.07464911         |
| 775 | MORI_IMMATURE_B_LYMPHOCYTE_DN                        | 87        | Down      | 0.012242846        | 0.074667816        |
| 776 | HOFMANN_MYELODYSPLASTIC_SYNDROM_RISK_<br>UP          | 20        | Up        | 0.012247102        | 0.074667816        |
| 777 | HOFFMANN_LARGE_TO_SMALL_PRE_BII_LYMPH<br>OCYTE_UP    | 155       | Down      | 0.012305136        | 0.07492496         |
| 778 | WACKER_HYPOXIA_TARGETS_OF_VHL                        | 12        | Up        | 0.01235905         | 0.075144588        |
| 779 | FRIDMAN_IMMORTALIZATION_DN                           | 30        | Up        | 0.012373014        | 0.075144588        |
| 780 | <b>SARTIPY_BLUNTED_BY_INSULIN_RESISTANCE_UP</b>      | <b>17</b> | <b>Up</b> | <b>0.012466255</b> | <b>0.075613677</b> |
| 781 | ALFANO_MYC_TARGETS                                   | 218       | Up        | 1.25E-02           | 7.58E-02           |
| 782 | REACTOME_PHASE_II_CONJUGATION                        | 39        | Up        | 1.26E-02           | 7.61E-02           |
| 783 | PUJANA_XPRSS_INT_NETWORK                             | 165       | Down      | 0.012606781        | 0.076172688        |
| 784 | CAIRO_HEPATOBLASTOMA_UP                              | 193       | Up        | 0.012669285        | 0.076452584        |
| 785 | ZHANG_RESPONSE_TO_CANTHARIDIN_UP                     | 17        | Up        | 0.012703023        | 0.076558398        |
| 786 | VARELA_ZMPSTE24_TARGETS_DN                           | 27        | Up        | 0.012751675        | 0.076589578        |
| 787 | <b>SESTO_RESPONSE_TO_UV_C8</b>                       | <b>68</b> | <b>Up</b> | <b>0.012751921</b> | <b>0.076589578</b> |
| 788 | BEGUM_TARGETS_OF_PAX3_FOXO1_FUSION_DN                | 43        | Up        | 0.012761112        | 0.076589578        |
| 789 | SHIN_B_CELL_LYMPHOMA_CLUSTER_7                       | 26        | Down      | 0.012773034        | 0.076589578        |
| 790 | KIM_ALL_DISORDERS_OLIGODENDROCYTE_NUM<br>BER_CORR_DN | 22        | Up        | 0.012814385        | 0.076740136        |
| 791 | MARTENS_TRETINOIN_RESPONSE_UP                        | 386       | Down      | 0.012854981        | 0.076885802        |
| 792 | MARSON_BOUND_BY_E2F4_UNSTIMULATED                    | 683       | Down      | 0.012918714        | 0.077169307        |
| 793 | ZHOU_INFLAMMATORY_RESPONSE_LIVE_UP                   | 348       | Up        | 0.012970508        | 0.077344622        |
| 794 | KEGG_VIBRIO_CHOLERAE_INFECTION                       | 49        | Up        | 0.012980801        | 0.077344622        |

|     | A                                                      | B   | C    | D           | E           |
|-----|--------------------------------------------------------|-----|------|-------------|-------------|
| 795 | WHITEFORD_PEDIATRIC_CANCER_MARKERS                     | 113 | Down | 0.013025115 | 0.077493346 |
| 796 | LE_SKI_TARGETS_DN                                      | 7   | Up   | 0.013038563 | 0.077493346 |
| 797 | JECHLINGER_EPITHELIAL_TO_MESENCHYMAL_TRANSITION_UP     | 54  | Up   | 0.013103595 | 0.07774503  |
| 798 | XU_RESPONSE_TO_TRETINOIN_AND_NSC682994_UP              | 15  | Up   | 0.01312645  | 0.07774503  |
| 799 | REACTOME_MITOTIC_M_M_G1_PHASES                         | 165 | Down | 0.013130272 | 0.07774503  |
| 800 | REACTOME_METABOLISM_OF_PORPHYRINS                      | 12  | Up   | 0.013168179 | 0.077871899 |
| 801 | MEINHOLD_OVARIAN_CANCER_LOW_GRADE_UP                   | 16  | Up   | 0.013210087 | 0.078022076 |
| 802 | KATSANOUELAVL1_TARGETS_UP                              | 122 | Up   | 0.013387436 | 0.078970829 |
| 803 | JOHANSSON_GLIOMAGENESIS_BY_PDGF_UP                     | 56  | Up   | 0.013464341 | 0.07919368  |
| 804 | TURASHVILI_BREAST_DUCTAL_CARCINOMA_VS_DUCTAL_NORMAL_DN | 142 | Up   | 0.013480095 | 0.07919368  |
| 805 | WILLIAMS_ESR1_TARGETS_UP                               | 23  | Down | 0.013497192 | 0.07919368  |
| 806 | SEKI_INFLAMMATORY_RESPONSE_LPS_UP                      | 54  | Up   | 0.013497489 | 0.07919368  |
| 807 | KIM_PTEN_TARGETS_UP                                    | 16  | Up   | 0.013510384 | 0.07919368  |
| 808 | DORSEY_GAB2_TARGETS                                    | 21  | Up   | 0.013525778 | 0.07919368  |
| 809 | LIU_SMARCA4_TARGETS                                    | 43  | Up   | 0.013567386 | 0.079324581 |
| 810 | SPIELMAN_LYMPHOBLAST_EUROPEAN_VS_ASIAN_2FC_DN          | 15  | Up   | 0.013581711 | 0.079324581 |
| 811 | REACTOME_MRNA_CAPPING                                  | 26  | Down | 0.013606517 | 0.07937135  |
| 812 | GEISS_RESPONSE_TO_DSRNA_DN                             | 13  | Up   | 0.01363213  | 0.079422703 |
| 813 | ZWANG_EGF_INTERVAL_UP                                  | 62  | Up   | 0.013666539 | 0.07952512  |
| 814 | KRIEG_KDM3A_TARGETS_NOT_HYPOXIA                        | 169 | Up   | 0.013795582 | 0.080177273 |
| 815 | KIM_HYPOXIA                                            | 23  | Up   | 0.013823042 | 0.080187966 |
| 816 | BOYVAULT_LIVER_CANCER_SUBCLASS_G5_DN                   | 23  | Up   | 0.013831363 | 0.080187966 |
| 817 | WIKMAN_ASBESTOS_LUNG_CANCER_UP                         | 16  | Up   | 0.013937624 | 0.080704991 |
| 818 | TAKEDA_TARGETS_OF_NUP98_HOXA9_FUSION_16D_DN            | 93  | Up   | 0.014001184 | 0.080973799 |
| 819 | MUELLER_COMMON_TARGETS_OF_AML_FUSIONS_UP               | 14  | Down | 0.014059304 | 0.081210529 |

|     | A                                                  | B   | C    | D                  | E                  |
|-----|----------------------------------------------------|-----|------|--------------------|--------------------|
| 820 | CHYLA_CBFA2T3_TARGETS_DN                           | 185 | Up   | 0.014097438        | 0.081331371        |
| 821 | PELLICCIOTTA_HDAC_IN_ANTIGEN_PRESENTATIO<br>N_UP   | 63  | Up   | <b>0.014132378</b> | <b>0.081433519</b> |
| 822 | LEE_LIVER_CANCER_MYC_E2F1_UP                       | 40  | Up   | 1.43E-02           | 8.23E-02           |
| 823 | ABRAHAM_ALPC_VS_MULTIPLE_MYELOMA_UP                | 22  | Up   | 1.43E-02           | 8.23E-02           |
| 824 | MORI_MATURE_B_LYMPHOCYTE_UP                        | 75  | Up   | 0.014460512        | 0.082923552        |
| 825 | VANLOO_SP3_TARGETS_DN                              | 67  | Up   | 0.014464921        | 0.082923552        |
| 826 | LEI_MYB_TARGETS                                    | 273 | Up   | 0.01448809         | 0.082923552        |
| 827 | LIAN_LIPA_TARGETS_6M                               | 30  | Up   | 0.014496265        | 0.082923552        |
| 828 | LEE_NEURAL_CREST_STEM_CELL_DN                      | 102 | Up   | 0.014670339        | 0.083784904        |
| 829 | KEGG_SPLICEOSOME                                   | 125 | Down | 0.014685226        | 0.083784904        |
| 830 | HE_PTEN_TARGETS_DN                                 | 7   | Up   | 0.014700039        | 0.083784904        |
| 831 | BIOCARTA_CERAMIDE_PATHWAY                          | 21  | Up   | 0.014956725        | 0.085020511        |
| 832 | YAMASHITA_METHYLATED_IN_PROSTATE_CANCE<br>R        | 33  | Up   | 0.014957565        | 0.085020511        |
| 833 | LENAOUR_DENDRITIC_CELL_MATURATION_UP               | 88  | Up   | 0.014970807        | 0.085020511        |
| 834 | REACTOME_GOLGI_ASSOCIATED_VESICLE_BIOGE<br>NESIS   | 52  | Up   | 0.015165453        | 0.086022527        |
| 835 | MOSERLE_IFNA_RESPONSE                              | 14  | Up   | 0.015226739        | 0.086266596        |
| 836 | DACOSTA_LOW_DOSE_UV_RESPONSE_VIA_ERCC<br>3_XPCS_DN | 9   | Up   | 0.015298555        | 0.086569669        |
| 837 | TAKEDA_TARGETS_OF_NUP98_HOXA9_FUSION_6<br>HR_UP    | 49  | Up   | 0.015438012        | 0.087254314        |
| 838 | SCHLESINGER_METHYLATED_DE_NOVO_IN_CANC<br>ER       | 55  | Down | 0.015536796        | 0.087707719        |
| 839 | CHIANG_LIVER_CANCER_SUBCLASS_PROLIFERATI<br>ON_DN  | 101 | Up   | 0.015596578        | 0.087940133        |
| 840 | BIOCARTA_CTL_PATHWAY                               | 4   | Up   | 0.015615208        | 0.087940236        |
| 841 | FARMER_BREAST_CANCER_BASAL_VS_LULMINAL             | 278 | Up   | 0.015636598        | 0.087955866        |
| 842 | LUI_THYROID_CANCER_CLUSTER_5                       | 7   | Up   | 0.016091984        | 0.09040978         |

|     | A                                                                 | B   | C    | D           | E           |
|-----|-------------------------------------------------------------------|-----|------|-------------|-------------|
| 843 | REACTOME_RECRUITMENT_OF_MITOTIC_CENTROSOME_PROTEINS_AND_COMPLEXES | 63  | Down | 0.016184976 | 0.09082424  |
| 844 | PUJANA_BRCA_CENTERED_NETWORK                                      | 117 | Down | 0.016243817 | 0.090928256 |
| 845 | DORN_ADENOVIRUS_INFECTION_12HR_DN                                 | 29  | Up   | 0.016262543 | 0.090928256 |
| 846 | KEGG_NICOTINATE_AND_NICOTINAMIDE_METABOLISM                       | 20  | Up   | 0.016278247 | 0.090928256 |
| 847 | BOYAUULT_LIVER_CANCER_SUBCLASS_G6_DN                              | 16  | Up   | 0.01629951  | 0.090928256 |
| 848 | MASRI_RESISTANCE_TO_TAMOXIFEN_AND_AROMATASE_INHIBITORS_DN         | 15  | Up   | 0.016299732 | 0.090928256 |
| 849 | VECCHI_GASTRIC_CANCER_EARLY_UP                                    | 383 | Down | 0.016329847 | 0.09098883  |
| 850 | VERHAAK_AML_WITH_NPM1_MUTATED_UP                                  | 99  | Up   | 0.016418071 | 0.091335801 |
| 851 | NAKAJIMA_MAST_CELL                                                | 32  | Up   | 0.016430779 | 0.091335801 |
| 852 | NIKOLSKY_BREAST_CANCER_8Q12_Q22_AMPLIFICATION                     | 109 | Up   | 0.016695493 | 0.092596496 |
| 853 | BURTON_ADIPOGENESIS_6                                             | 158 | Up   | 0.016696765 | 0.092596496 |
| 854 | ZIRN_TRETINOIN_RESPONSE_WT1_UP                                    | 20  | Up   | 0.016736226 | 0.092706527 |
| 855 | CHICAS_RB1_TARGETS_SENESCENT                                      | 494 | Up   | 0.01676327  | 0.092747599 |
| 856 | LU_EZH2_TARGETS_DN                                                | 366 | Up   | 0.01679739  | 0.092753815 |
| 857 | YAO_TEMPORAL_RESPONSE_TO_PROGESTERONE_CLUSTER_16                  | 72  | Up   | 0.016836017 | 0.092753815 |
| 858 | GARGALOVIC_RESPONSE_TO_OXIDIZED_PHOSPHOLIPIDS_MAGENTA_UP          | 27  | Up   | 0.01685055  | 0.092753815 |
| 859 | REACTOME_COLLAGEN_FORMATION                                       | 53  | Up   | 0.016853818 | 0.092753815 |
| 860 | MANALO_HYPOXIA_UP                                                 | 193 | Up   | 0.016862545 | 0.092753815 |
| 861 | NGUYEN_NOTCH1_TARGETS_UP                                          | 26  | Up   | 0.016886909 | 0.092779822 |
| 862 | HERNANDEZ_MITOTIC_ARREST_BY_DOCETAXEL_2_DN                        | 13  | Up   | 0.016914364 | 0.09282273  |
| 863 | LAMB_CCND1_TARGETS                                                | 17  | Up   | 1.69E-02    | 9.28E-02    |
| 864 | PARENT_MTOR_SIGNALING_DN                                          | 34  | Up   | 1.70E-02    | 9.30E-02    |
| 865 | INGA_TP53_TARGETS                                                 | 15  | Up   | 0.017090633 | 0.093464399 |
| 866 | TAKEDA_TARGETS_OF_NUP98_HOXA9_FUSION_10D_UP                       | 120 | Up   | 0.017264055 | 0.094303651 |

|     | A                                                     | B   | C    | D           | E           |
|-----|-------------------------------------------------------|-----|------|-------------|-------------|
| 867 | REACTOME_VEGF_LIGAND_RECEPTOR_INTERACTIONS            | 9   | Up   | 0.017438101 | 0.095144375 |
| 868 | ST_DIFFERENTIATION_PATHWAY_IN_PC12_CELLS              | 39  | Up   | 0.017492634 | 0.095331829 |
| 869 | KEGG_JAK_STAT_SIGNALING_PATHWAY                       | 84  | Up   | 0.017559841 | 0.095587842 |
| 870 | OUILLETTE_CLL_13Q14_DELETION_DN                       | 51  | Up   | 0.017590058 | 0.095642143 |
| 871 | REACTOME_PROCESSING_OF_CAPPED_INTRONLESS_PRE_MRNA     | 23  | Down | 0.017643377 | 0.09582179  |
| 872 | HASEGAWA_TUMORIGENESIS_BY_RET_C634R                   | 10  | Up   | 0.017690432 | 0.095967037 |
| 873 | PEDERSEN_TARGETS_OF_611CTF_ISOFORM_OF_ERBB2           | 63  | Up   | 0.017745786 | 0.096156927 |
| 874 | MARCINIAK_ER_STRESS_RESPONSE_VIA_CHOP                 | 22  | Up   | 0.01781263  | 0.096408565 |
| 875 | STEIN_ESRRA_TARGETS_RESPONSIVE_TO_ESTROGEN_DN         | 41  | Up   | 0.017833338 | 0.096410437 |
| 876 | REACTOME_ENOS_ACTIVATION_AND_REGULATION               | 18  | Up   | 0.017871621 | 0.096506755 |
| 877 | REACTOME_MICRORNA_MIRNA_BIOGENESIS                    | 21  | Down | 0.018123101 | 0.097753025 |
| 878 | OHGUCHI_LIVER_HNF4A_TARGETS_UP                        | 30  | Up   | 0.018161177 | 0.097773698 |
| 879 | LEE_TARGETS_OF_PTCH1_AND_SUFU_DN                      | 71  | Up   | 0.018168319 | 0.097773698 |
| 880 | ZHAN_MULTIPLE_MYELOMA_MS_UP                           | 43  | Up   | 0.018266446 | 0.098095922 |
| 881 | PID_GLYPICAN_1PATHWAY                                 | 22  | Up   | 0.018288685 | 0.098095922 |
| 882 | ONO_FOXP3_TARGETS_UP                                  | 12  | Up   | 0.018307404 | 0.098095922 |
| 883 | REACTOME_APC_C_CDC20_MEDIATED_DEGRADATION_OF_CYCLIN_B | 19  | Down | 0.018311239 | 0.098095922 |
| 884 | PEDRIOLI_MIR31_TARGETS_DN                             | 305 | Up   | 0.018373746 | 0.098145079 |
| 885 | KOYAMA_SEMA3B_TARGETS_UP                              | 248 | Up   | 0.018378132 | 0.098145079 |
| 886 | REACTOME_OTHER_SEMAPHORIN_INTERACTIONS                | 13  | Up   | 0.018382729 | 0.098145079 |
| 887 | LUI_THYROID_CANCER_CLUSTER_4                          | 10  | Up   | 0.018480377 | 0.098555058 |
| 888 | KEGG_BASAL_CELL_CARCINOMA                             | 39  | Down | 0.018632398 | 0.099165977 |
| 889 | ENK_UV_RESPONSE_EPIDERMIS_DN                          | 447 | Up   | 0.018650722 | 0.099165977 |
| 890 | GNATENKO_PLATELET_SIGNATURE                           | 40  | Up   | 0.018657895 | 0.099165977 |

|     | A                                                            | B         | C         | D                  | E                  |
|-----|--------------------------------------------------------------|-----------|-----------|--------------------|--------------------|
| 891 | DITTMER_PTHLH_TARGETS_UP                                     | 109       | Up        | 0.01877639         | 0.099683644        |
| 892 | REACTOME_DNA_REPLICATION                                     | 185       | Down      | 0.018894203        | 0.100173683        |
| 893 | REACTOME_MITOTIC_G2_G2_M_PHASES                              | 78        | Down      | 0.018911095        | 0.100173683        |
| 894 | REACTOME_RNA_POL_II_TRANSCRIPTION                            | 99        | Down      | 0.018932345        | 0.100173943        |
| 895 | FUJIWARA_PARK2_HEPATOCYTE_PROLIFERATION_UP                   | 4         | Up        | 0.019026393        | 0.100558958        |
| 896 | ONKEN_UVEAL_MELANOMA_UP                                      | 745       | Up        | 0.019151923        | 0.101109314        |
| 897 | MODY_HIPPOCAMPUS_PRENATAL                                    | 40        | Down      | 0.01919326         | 0.101214456        |
| 898 | ZHANG_TARGETS_OF_EWSR1_FLI1_FUSION                           | 78        | Up        | 0.019231736        | 0.101304294        |
| 899 | RHODES_CANCER_META_SIGNATURE                                 | 63        | Down      | 0.019403958        | 0.102097664        |
| 900 | GAVIN_PDE3B_TARGETS                                          | 12        | Up        | 0.019517559        | 0.102581162        |
| 901 | REACTOME_CELL_SURFACE_INTERACTIONS_AT_T<br>HE_VASCULAR_WALL  | 57        | Up        | 0.019802054        | 0.103960785        |
| 902 | GHANDHI_BYSTANDER_IRRADIATION_UP                             | 55        | Up        | 0.019862126        | 0.104160429        |
| 903 | <b>YAO_TEMPORAL_RESPONSE_TO_PROGESTERON<br/>E_CLUSTER_12</b> | <b>72</b> | <b>Up</b> | <b>0.020015846</b> | <b>0.104850192</b> |
| 904 | BIOCARTA_DREAM_PATHWAY                                       | 12        | Up        | 2.02E-02           | 1.06E-01           |
| 905 | KYNG_NORMAL_AGING_DN                                         | 26        | Up        | 2.04E-02           | 1.07E-01           |
| 906 | LOPEZ_MESOTHELIOMA_SURVIVAL_UP                               | 9         | Up        | 0.020613873        | 0.107624919        |
| 907 | PID_EPHB_FWD_PATHWAY                                         | 39        | Down      | 0.020641946        | 0.107652533        |
| 908 | ALONSO_METASTASIS_UP                                         | 179       | Up        | 0.020695725        | 0.107803149        |
| 909 | MILI_PSEUDOPODIA_CHEMOTAXIS_UP                               | 71        | Up        | 0.020716457        | 0.107803149        |
| 910 | REACTOME_RECRUITMENT_OF_NUMA_TO_MITO<br>TIC_CENTROSOMES      | 10        | Down      | 0.020828885        | 0.107973313        |
| 911 | TAGHAVI_NEOPLASTIC_TRANSFORMATION                            | 12        | Up        | 0.020830716        | 0.107973313        |
| 912 | FRIDMAN_SENESCENCE_DN                                        | 10        | Down      | 0.020849138        | 0.107973313        |
| 913 | REACTOME_VIRAL_MESSENGER_RNA_SYNTHESIS                       | 13        | Down      | 0.020853543        | 0.107973313        |
| 914 | BRUNEAU_HEART_GREAT_VESSELS_AND_VALVU<br>LOGENESIS           | 5         | Down      | 0.020867555        | 0.107973313        |
| 915 | BIOCARTA_ARENRF2_PATHWAY                                     | 13        | Up        | 0.020886266        | 0.107973313        |
| 916 | GERHOLD_RESPONSE_TO_TZD_DN                                   | 9         | Up        | 0.021041673        | 0.108657822        |



|     | A                                          | B          | C         | D                 | E                  |
|-----|--------------------------------------------|------------|-----------|-------------------|--------------------|
| 917 | LIAN_LIPA_TARGETS_3M                       | 22         | Up        | 0.021305323       | 0.109899184        |
| 918 | DER_IFN_ALPHA_RESPONSE_DN                  | 5          | Down      | 0.021346418       | 0.109991087        |
| 919 | BOYALT_LIVER_CANCER_SUBCLASS_G12_DN        | 9          | Up        | 0.021431429       | 0.110308825        |
| 920 | KUROZUMI_RESPONSE_TO_ONCOCYTIC_VIRUS       | 12         | Up        | 0.021516616       | 0.110618812        |
| 921 | WILCOX_RESPONSE_TO_PROGESTERONE_DN         | 50         | Up        | 0.021538478       | 0.110618812        |
| 922 | NIKOLSKY_BREAST_CANCER_14Q22_AMPLICON      | 13         | Up        | 0.021650699       | 0.111074434        |
| 923 | MELLMAN_TUT1_TARGETS_DN                    | 47         | Up        | 0.021681871       | 0.111113712        |
| 924 | ROY_WOUND_BLOOD_VESSEL_UP                  | 40         | Up        | 0.021833638       | 0.111770249        |
| 925 | FREDERICK_PRKCI_TARGETS                    | 6          | Down      | 0.021965687       | 0.11227011         |
| 926 | SHETH_LIVER_CANCER_VS_TXNIP_LOSS_PAM1      | 196        | Up        | 0.021978805       | 0.11227011         |
| 927 | KONDO_EZH2_TARGETS                         | 181        | Up        | 0.022066355       | 0.1125956          |
| 928 | PUJANA_BRCA2_PCC_NETWORK                   | 395        | Down      | 0.02209295        | 0.112609697        |
| 929 | KINSEY_TARGETS_OF_EWSR1_FLII_FUSION_DN     | 291        | Up        | 0.022182665       | 0.112945143        |
| 930 | HAHTOLA_SEZARY_SYNDROM_DN                  | 20         | Up        | 0.022318844       | 0.113399168        |
| 931 | REACTOME_ENDOGENOUS_STEROLS                | 6          | Up        | 0.022319836       | 0.113399168        |
| 932 | SA_MMP_CYTOKINE_CONNECTION                 | 9          | Up        | 0.0223585         | 0.113473592        |
| 933 | CONCANNON_APOPTOSIS_BY_EPOXOMICIN_DN       | 150        | Down      | 0.022419577       | 0.113661484        |
| 934 | PID_CD40_PATHWAY                           | 26         | Up        | 0.022455523       | 0.1137217          |
| 935 | FUKUSHIMA_TNFSF11_TARGETS                  | 15         | Down      | 0.022499222       | 0.113821011        |
| 936 | BENPORATH_NOS_TARGETS                      | 171        | Down      | 0.022670788       | 0.114566281        |
| 937 | BURTON_ADIPOGENESIS_12                     | 36         | Down      | 0.022759162       | 0.114890003        |
| 938 | KEGG_STEROID_HORMONE_BIOSYNTHESIS          | 16         | Up        | 0.022796175       | 0.11495403         |
| 939 | CHEN_METABOLIC_SYNDROM_NETWORK             | 930        | Up        | 0.022824041       | 0.114971847        |
| 940 | PID_CERAMIDE_PATHWAY                       | 43         | Up        | 0.022934475       | 0.115405108        |
| 941 | GOTTWEIN_TARGETS_OF_KSHV_MIR_K12_11        | 57         | Up        | 0.022997476       | 0.115599014        |
| 942 | MCBRYAN_PUBERTAL_BREAST_3_4WK_UP           | 174        | Up        | 0.023025105       | 0.115605977        |
| 943 | GRAHAM_CML_QUIESCENT_VS_CML_DIVIDING_UP    | 12         | Up        | 0.023047795       | 0.115605977        |
| 944 | <b>JAATINEN_HEMATOPOIETIC_STEM_CELL_DN</b> | <b>103</b> | <b>Up</b> | <b>0.02317817</b> | <b>0.116136642</b> |
| 945 | LEE_AGING_MUSCLE_DN                        | 39         | Up        | 2.33E-02          | 1.16E-01           |
| 946 | HOSHIDA_LIVER_CANCER_SURVIVAL_DN           | 89         | Up        | 2.33E-02          | 1.16E-01           |

|     | A                                                       | B   | C    | D           | E           |
|-----|---------------------------------------------------------|-----|------|-------------|-------------|
| 947 | REACTOME_CYTOCHROME_P450_ARRANGED_BY<br>_SUBSTRATE_TYPE | 17  | Up   | 0.023316298 | 0.116458253 |
| 948 | WANG_METASTASIS_OF_BREAST_CANCER_ESR1<br>_UP            | 22  | Down | 0.023402168 | 0.116763721 |
| 949 | VALK_AML_CLUSTER_12                                     | 23  | Up   | 0.023470932 | 0.116983286 |
| 950 | LEE_METASTASIS_AND_RNA_PROCESSING_UP                    | 17  | Down | 0.023572068 | 0.117363564 |
| 951 | YANG_BREAST_CANCER_ESR1_BULK_UP                         | 24  | Up   | 0.023693616 | 0.117844566 |
| 952 | RICKMAN_TUMOR_DIFFERENTIATED_WELL_VS_<br>MODERATELY_DN  | 73  | Up   | 0.023799484 | 0.118170578 |
| 953 | BIOCARTA_IL10_PATHWAY                                   | 12  | Up   | 0.023809183 | 0.118170578 |
| 954 | FAELT_B_CLL_WITH_VH_REARRANGEMENTS_UP                   | 43  | Up   | 0.02392832  | 0.118637262 |
| 955 | NIKOLSKY_BREAST_CANCER_20Q12_Q13_AMPLIC<br>ON           | 106 | Down | 0.024041734 | 0.119074628 |
| 956 | SUZUKI_CTCFL_TARGETS_UP                                 | 7   | Up   | 0.024113565 | 0.119305336 |
| 957 | PLASARI_NFIC_TARGETS_BASAL_UP                           | 20  | Up   | 0.024151792 | 0.119369474 |
| 958 | PAL_PRMT5_TARGETS_DN                                    | 18  | Up   | 0.024230879 | 0.119635219 |
| 959 | ZHANG_TLX_TARGETS_36HR_UP                               | 204 | Up   | 0.024285073 | 0.119777631 |
| 960 | KEGG_CIRCADIAN_RHYTHM_MAMMAL                            | 13  | Up   | 0.024548351 | 0.120940969 |
| 961 | MOTAMED_RESPONSE_TO_ANDROGEN_DN                         | 6   | Up   | 0.024572133 | 0.120940969 |
| 962 | KIM_MYCN_AMPLIFICATION_TARGETS_DN                       | 96  | Up   | 0.024801968 | 0.121945161 |
| 963 | VANTVEER_BREAST_CANCER_ESR1_DN                          | 203 | Up   | 0.024840923 | 0.121971633 |
| 964 | TOMLINS_METASTASIS_DN                                   | 18  | Up   | 0.02485898  | 0.121971633 |
| 965 | GAVIN_IL2_RESPONSIVE_FOXP3_TARGETS_UP                   | 13  | Up   | 0.024916931 | 0.122129147 |
| 966 | SCIAN_INVERSED_TARGETS_OF_TP53_AND_TP73<br>_DN          | 29  | Up   | 0.025105275 | 0.122924791 |
| 967 | BIOCARTA_RANKL_PATHWAY                                  | 13  | Up   | 0.025156633 | 0.123048747 |
| 968 | LEE_LIVER_CANCER_DENA_UP                                | 41  | Up   | 0.025362575 | 0.123927786 |
| 969 | PID_INTEGRIN1_PATHWAY                                   | 55  | Up   | 0.025456776 | 0.124259574 |
| 970 | CHENG_IMPRINTED_BY ESTRADIOL                            | 87  | Down | 0.025562921 | 0.124648918 |
| 971 | DAVICIONI_RHABDOMYOSARCOMA_PAX_FOXO1_<br>FUSION_DN      | 13  | Up   | 0.02562331  | 0.124814578 |

|     | A                                                                 | B         | C           | D                  | E                  |
|-----|-------------------------------------------------------------------|-----------|-------------|--------------------|--------------------|
| 972 | LEIN_MEDULLA_MARKERS                                              | 60        | Up          | 0.025739512        | 0.125251485        |
| 973 | STEARMAN_TUMOR_FIELD_EFFECT_UP                                    | 21        | Up          | 0.025775818        | 0.125299114        |
| 974 | VERRECCHIA_RESPONSE_TO_TGFB1_C3                                   | 14        | Up          | 0.025814162        | 0.125356543        |
| 975 | TAKEDA_TARGETS_OF_NUP98_HOXA9_FUSION_6<br>HR_DN                   | 31        | Up          | 0.026009288        | 0.126174422        |
| 976 | BAKER_HEMATOPOESIS_STAT1_TARGETS                                  | 8         | Up          | 0.026095269        | 0.126416459        |
| 977 | AMIT_EGF_RESPONSE_20_HELA                                         | 10        | Up          | 0.026112691        | 0.126416459        |
| 978 | REACTOME_APC_C_CDC20_MEDIATED_DEGRADA<br>TION_OF_MITOTIC_PROTEINS | 64        | Down        | 0.026170722        | 0.126567719        |
| 979 | REACTOME_HDL_MEDIATED_LIPID_TRANSPORT                             | 7         | Up          | 0.026313822        | 0.127011808        |
| 980 | REACTOME_IL_6_SIGNALING                                           | 9         | Up          | 0.026316309        | 0.127011808        |
| 981 | REACTOME_SYNTHESIS_OF_PC                                          | 16        | Up          | 0.026352667        | 0.1270575          |
| 982 | SIMBULAN_UV_RESPONSE_IMMORTALIZED_DN                              | 29        | Up          | 0.026524664        | 0.12773168         |
| 983 | BIOCARTA_AGPCR_PATHWAY                                            | 11        | Up          | 0.026546563        | 0.12773168         |
| 984 | WOOD_EBV_EBNA1_TARGETS_UP                                         | 101       | Up          | 0.026724189        | 0.128367793        |
| 985 | <b>ODONNELL_TARGETS_OF_MYC_AND_TFRC_DN</b>                        | <b>43</b> | <b>Down</b> | <b>0.026733102</b> | <b>0.128367793</b> |
| 986 | BIOCARTA_CARM_ER_PATHWAY                                          | 32        | Down        | 2.72E-02           | 1.30E-01           |
| 987 | BREDEMEYER_RAG_SIGNALING_VIA_ATM_NOT_<br>VIA_NFKB_UP              | 40        | Up          | 2.74E-02           | 1.31E-01           |
| 988 | WINTER_HYPOXIA_METAGENE                                           | 212       | Up          | 0.027444677        | 0.13138409         |
| 989 | DAVICIONI_TARGETS_OF_PAX_FOXO1_FUSIONS_<br>DN                     | 57        | Up          | 0.02754551         | 0.131733334        |
| 990 | GRUETZMANN_PANCREATIC_CANCER_UP                                   | 306       | Up          | 0.027757702        | 0.132588225        |
| 991 | RASHI_RESPONSE_TO_IONIZING_RADIATION_1                            | 35        | Up          | 0.02778039         | 0.132588225        |
| 992 | <b>SEITZ_NEOPLASTIC_TRANSFORMATION_BY_8P_D<br/>ELETION_UP</b>     | <b>51</b> | <b>Up</b>   | <b>0.027922037</b> | <b>0.133129793</b> |
| 993 | PUIFFE_INVASION_INHIBITED_BY_ASCITES_DN                           | 134       | Up          | 0.028259205        | 0.134601557        |
| 994 | PID_SYNDECAN_2_PATHWAY                                            | 29        | Up          | 0.028311505        | 0.134714864        |
| 995 | MIKKELSEN_IPS_ICP_WITH_H3K27ME3                                   | 21        | Down        | 0.028340876        | 0.134718955        |
| 996 | VERRECCHIA_EARLY_RESPONSE_TO_TGFB1                                | 55        | Up          | 0.028406241        | 0.134893956        |
| 997 | FOSTER_KDM1A_TARGETS_UP                                           | 147       | Up          | 0.028502206        | 0.13521378         |
| 998 | PID_FAK_PATHWAY                                                   | 58        | Up          | 0.028577077        | 0.135392153        |

|      | A                                                                                            | B    | C    | D           | E           |
|------|----------------------------------------------------------------------------------------------|------|------|-------------|-------------|
| 999  | KEGG_PRION_DISEASES                                                                          | 22   | Up   | 0.028597115 | 0.135392153 |
| 1000 | BRUINS_UVC_RESPONSE_LATE                                                                     | 1028 | Up   | 0.028648672 | 0.135500475 |
| 1001 | REACTOME_FORMATION_OF_THE_TERNARY_COMPLEX_AND_SUBSEQUENTLY_THE_43S_COMPLEX                   | 47   | Down | 0.028714726 | 0.135677082 |
| 1002 | PID_AMB2_NEUTROPHILS_PATHWAY                                                                 | 32   | Up   | 0.028746599 | 0.135691987 |
| 1003 | BIOCARTA_AMI_PATHWAY                                                                         | 11   | Up   | 0.02885379  | 0.135982632 |
| 1004 | RUIZ_TNC_TARGETS_DN                                                                          | 136  | Up   | 0.028889407 | 0.135982632 |
| 1005 | LEE_LIVER_CANCER_MYC_UP                                                                      | 45   | Up   | 0.028894511 | 0.135982632 |
| 1006 | EPPERT_HSC_R                                                                                 | 100  | Up   | 0.029084457 | 0.136612855 |
| 1007 | BOHN_PRIMARY_IMMUNODEFICIENCY_SYNDROME_DN                                                    | 31   | Up   | 0.02908625  | 0.136612855 |
| 1008 | DAZARD_UV_RESPONSE_CLUSTER_G28                                                               | 14   | Up   | 0.029121738 | 0.136643707 |
| 1009 | VERHAAK_AML_WITH_NPM1_MUTATED_DN                                                             | 176  | Up   | 0.029336398 | 0.137514365 |
| 1010 | SMID_BREAST_CANCER_BASAL_UP                                                                  | 514  | Up   | 0.029603511 | 0.138628927 |
| 1011 | TIEN_INTESTINE_PROBIOTICS_6HR_UP                                                             | 53   | Up   | 0.030139751 | 0.141000319 |
| 1012 | BURTON_ADIPOGENESIS_7                                                                        | 45   | Up   | 0.030253908 | 0.141394377 |
| 1013 | REACTOME_PACKAGING_OF_TELOMERE_ENDS                                                          | 25   | Down | 0.030336732 | 0.141641364 |
| 1014 | KEGG_GLYCEROPHOSPHOLIPID_METABOLISM                                                          | 62   | Up   | 0.030382865 | 0.14171672  |
| 1015 | GRAHAM_NORMAL QUIESCENT VS NORMAL DIVIDING_DN                                                | 80   | Down | 0.030803546 | 0.143314358 |
| 1016 | REACTOME_RECEPTOR_LIGAND_BINDING_INITIATES_THE_SECOND_PROTEOLYTIC_CLEAVAGE_OF_NOTCH_RECEPTOR | 10   | Down | 0.030812046 | 0.143314358 |
| 1017 | WANG_RESPONSE_TO_BEXAROTENE_DN                                                               | 20   | Up   | 0.030816378 | 0.143314358 |
| 1018 | WANG_CISPLATIN_RESPONSE_AND_XPC_UP                                                           | 158  | Up   | 0.030898554 | 0.143549064 |
| 1019 | SCIAN_INVERSED_TARGETS_OF_TP53_AND_TP73_UP                                                   | 7    | Up   | 0.030927608 | 0.143549064 |
| 1020 | MIKKELSEN_MEF_LCP_WITH_H3K4ME3                                                               | 83   | Up   | 0.031244565 | 0.144740343 |
| 1021 | SHIPP_DLCL VS FOLLICULAR LYMPHOMA_UP                                                         | 43   | Down | 0.031245534 | 0.144740343 |
| 1022 | RICKMAN_HEAD_AND_NECK_CANCER_D                                                               | 9    | Up   | 0.031328351 | 0.144981839 |
| 1023 | REACTOME_TRANSCRIPTION                                                                       | 168  | Down | 0.031387367 | 0.145112829 |

|      | A                                                   | B         | C         | D                  | E                  |
|------|-----------------------------------------------------|-----------|-----------|--------------------|--------------------|
| 1024 | PELLICCIOTTA_HDAC_IN_ANTIGEN_PRESENTATIO<br>N_DN    | 47        | Up        | 0.03146757         | 0.145341417        |
| 1025 | BEGUM_TARGETS_OF_PAX3_FOXO1_FUSION_AN<br>D_PAX3     | 5         | Up        | 0.031524635        | 0.145462794        |
| 1026 | <b>PID_S1P_S1P3_PATHWAY</b>                         | <b>27</b> | <b>Up</b> | <b>0.031624707</b> | <b>0.145782184</b> |
| 1027 | PID_HIF1_TFPATHWAY                                  | 58        | Up        | 3.21E-02           | 1.47E-01           |
| 1028 | RHODES_UNDIFFERENTIATED_CANCER                      | 67        | Down      | 3.21E-02           | 1.47E-01           |
| 1029 | MCCOLLUM_GELDANAMYCIN_RESISTANCE_DN                 | 6         | Down      | 0.032111365        | 0.147482294        |
| 1030 | DAZARD_UV_RESPONSE_CLUSTER_G2                       | 24        | Up        | 0.032118366        | 0.147482294        |
| 1031 | HUANG_GATA2_TARGETS_UP                              | 110       | Up        | 0.032730844        | 0.150148774        |
| 1032 | HOSHIDA_LIVER_CANCER_SUBCLASS_S3                    | 187       | Up        | 0.032954264        | 0.151027058        |
| 1033 | <b>CAFFAREL_RESPONSE_TO_THC_UP</b>                  | <b>31</b> | <b>Up</b> | <b>0.032994134</b> | <b>0.151063261</b> |
| 1034 | DURAND_STROMA_NS_UP                                 | 137       | Up        | 0.033207527        | 0.151757729        |
| 1035 | CERVERA_SDHB_TARGETS_2                              | 84        | Up        | 0.033218535        | 0.151757729        |
| 1036 | REACTOME_EXTRACELLULAR_MATRIX_ORGANIZA<br>TION      | 67        | Up        | 0.033242169        | 0.151757729        |
| 1037 | WENG_POR_TARGETS_LIVER_DN                           | 13        | Up        | 0.033319869        | 0.151965618        |
| 1038 | MILI_PSEUDOPODIA_HAPTOTAXIS_DN                      | 648       | Up        | 0.03351933         | 0.152727901        |
| 1039 | AMUNDSON_POOR_SURVIVAL_AFTER_GAMMA_<br>RADIATION_2G | 155       | Up        | 0.033800436        | 0.153860366        |
| 1040 | TIEN_INTESTINE_PROBIOTICS_24HR_UP                   | 542       | Up        | 0.033855764        | 0.153875317        |
| 1041 | XU_RESPONSE_TO_TRETINOIN_UP                         | 13        | Up        | 0.033868853        | 0.153875317        |
| 1042 | RAMASWAMY_METASTASIS_UP                             | 63        | Down      | 0.034082426        | 0.154321786        |
| 1043 | RICKMAN_HEAD_AND_NECK_CANCER_E                      | 33        | Up        | 0.03410041         | 0.154321786        |
| 1044 | BOYLAN_MULTIPLE_MYELOMA_C_D_DN                      | 161       | Up        | 0.034104622        | 0.154321786        |
| 1045 | MOOTHA_VOXPHOS                                      | 84        | Down      | 0.034129293        | 0.154321786        |
| 1046 | NAKAMURA_TUMOR_ZONE_PERIPHERAL_VS_CE<br>NTRAL_UP    | 262       | Up        | 0.034132553        | 0.154321786        |
| 1047 | BIOCARTA_PTC1_PATHWAY                               | 10        | Down      | 0.034163087        | 0.154321786        |
| 1048 | VICENT_METASTASIS_UP                                | 13        | Up        | 0.034226282        | 0.154459581        |
| 1049 | ONKEN_UVEAL_MELANOMA_DN                             | 494       | Up        | 0.034295168        | 0.154622777        |

|      | A                                                        | B         | C         | D                  | E                  |
|------|----------------------------------------------------------|-----------|-----------|--------------------|--------------------|
| 1050 | REACTOME_PHOSPHORYLATION_OF_THE_APC_C                    | 17        | Down      | 0.034341071        | 0.154682137        |
| 1051 | CHAUHAN_RESPONSE_TO_METHOXYESTRADIOL_UP                  | 49        | Up        | 0.034389641        | 0.154753386        |
| 1052 | TSUTSUMI_FBXW8_TARGETS                                   | 7         | Down      | 0.034490164        | 0.155058064        |
| 1053 | TURASHVILI_BREAST_LOBULAR_CARCINOMA_VS_LOBULAR_NORMAL_DN | 58        | Up        | 0.034824137        | 0.156410689        |
| 1054 | LANDIS_ERBB2_BREAST_PRENEOPLASTIC_UP                     | 16        | Up        | 0.034903818        | 0.156619695        |
| 1055 | TIEN_INTESTINE_PROBIOTICS_6HR_DN                         | 161       | Up        | 0.035182276        | 0.157719408        |
| 1056 | GAUSSMANN_MLL_AF4_FUSION_TARGETS_A_D_N                   | 70        | Up        | 0.035629922        | 0.159501261        |
| 1057 | DAZARD_RESPONSE_TO_UV_SCC_UP                             | 109       | Up        | 0.035647266        | 0.159501261        |
| 1058 | CHEN_HOXA5_TARGETS_6HR_UP                                | 9         | Up        | 0.035787734        | 0.15997828         |
| 1059 | STARK_HYPPOCAMPUS_22Q11_DELETION_UP                      | 50        | Up        | 0.03603493         | 0.160847129        |
| 1060 | ST_PAC1_RECEPTOR_PATHWAY                                 | 4         | Up        | 0.036050182        | 0.160847129        |
| 1061 | MARSON_FOXP3_TARGETS_DN                                  | 43        | Up        | 0.036403236        | 0.16226914         |
| 1062 | NIELSEN_LIPOSARCOMA_UP                                   | 12        | Down      | 0.036459764        | 0.162367939        |
| 1063 | PID_PI3KCI_PATHWAY                                       | 38        | Down      | 0.036531099        | 0.162532431        |
| 1064 | CROMER_METASTASIS_UP                                     | 72        | Up        | 0.036699501        | 0.163128072        |
| 1065 | THUM_SYSTOLIC_HEART_FAILURE_UP                           | 314       | Up        | 0.03681685         | 0.163495882        |
| 1066 | GENTILE_UV_RESPONSE_CLUSTER_D8                           | 39        | Up        | 0.036991011        | 0.164115048        |
| 1067 | <b>WINTER_HYPOXIA_DN</b>                                 | <b>32</b> | <b>Up</b> | <b>0.037116655</b> | <b>0.164410401</b> |
| 1068 | HASLINGER_B_CLL_WITH_13Q14_DELETION                      | 24        | Up        | 3.71E-02           | 1.64E-01           |
| 1069 | PLASARI_TGFB1_SIGNALING_VIA_NFIC_10HR_UP                 | 42        | Up        | 3.72E-02           | 1.64E-01           |
| 1070 | GU_PDEF_TARGETS_UP                                       | 64        | Up        | 0.037273537        | 0.164749731        |
| 1071 | PID_VEGF_VEGFR_PATHWAY                                   | 9         | Up        | 0.03745674         | 0.165404762        |
| 1072 | MARKEY_RB1_CHRONIC_LOF_DN                                | 80        | Up        | 0.037591441        | 0.165844592        |
| 1073 | ABBUD_LIF_SIGNALING_1_UP                                 | 31        | Up        | 0.037837016        | 0.166772295        |
| 1074 | HASINA_NOL7_TARGETS_DN                                   | 13        | Up        | 0.037926183        | 0.16700952         |
| 1075 | NUYTEN_NIPP1_TARGETS_DN                                  | 779       | Up        | 0.038084582        | 0.167550883        |
| 1076 | ZHANG_TLX_TARGETS_36HR_DN                                | 182       | Down      | 0.038433016        | 0.168926514        |

|      | A                                                                     | B   | C    | D           | E           |
|------|-----------------------------------------------------------------------|-----|------|-------------|-------------|
| 1077 | IM_SREBF1A_TARGETS                                                    | 5   | Up   | 0.038731121 | 0.170068539 |
| 1078 | FORTSCHEGGER_PHF8_TARGETS_UP                                          | 234 | Up   | 0.038764829 | 0.170068539 |
| 1079 | PYEON_CANCER_HEAD_AND_NECK_VS_CERVICAL_DN                             | 11  | Down | 0.038809681 | 0.170107367 |
| 1080 | REACTOME_PROCESSING_OF_INTRONLESS_PRE_MRNAS                           | 14  | Down | 0.038903683 | 0.170361353 |
| 1081 | REACTOME_CIRCADIAN_REPRESSION_OF_EXPRESSION_BY_REV_ERBA               | 22  | Down | 0.038981076 | 0.170440509 |
| 1082 | MIKKELSEN_MCV6_LCP_WITH_H3K4ME3                                       | 95  | Up   | 0.038993903 | 0.170440509 |
| 1083 | WANG_METASTASIS_OF_BREAST_CANCER_ESR1_DN                              | 23  | Up   | 0.03930664  | 0.171648682 |
| 1084 | KEGG_PEROXISOME                                                       | 70  | Up   | 0.039392139 | 0.171737643 |
| 1085 | SCHLOSSER_MYC_AND_SERUM_RESPONSE_SYNERGY                              | 32  | Down | 0.039399705 | 0.171737643 |
| 1086 | LI_WILMS_TUMOR_VS_FETAL_KIDNEY_2_DN                                   | 46  | Up   | 0.03945988  | 0.171841414 |
| 1087 | SCHRAETS_MLL_TARGETS_UP                                               | 27  | Up   | 0.03956276  | 0.172005961 |
| 1088 | REACTOME_LOSS_OF_NLP_FROM_MITOTIC_CENTROSOMES                         | 56  | Down | 0.03960488  | 0.172005961 |
| 1089 | REACTOME_UNBLOCKING_OF_NMDA_RECEPTOR_Glutamate_Binding_and_Activation | 11  | Down | 0.039666331 | 0.172005961 |
| 1090 | CASORELLI_ACUTE_PROMYELOCYTIC_LEUKEMIA_DN                             | 626 | Up   | 0.039676833 | 0.172005961 |
| 1091 | MORI_PLASMA_CELL_DN                                                   | 25  | Up   | 0.039679682 | 0.172005961 |
| 1092 | KEGG_GLYCOSPHINGOLIPID_BIOSYNTHESIS_GLOBOSERIES                       | 14  | Up   | 0.03976505  | 0.172218021 |
| 1093 | REACTOME_SIGNALING_BY_FGFR1_FUSION_MUTANTS                            | 18  | Down | 0.039950357 | 0.172862121 |
| 1094 | SANA_TNF_SIGNALING_UP                                                 | 58  | Up   | 0.040176001 | 0.173572042 |
| 1095 | ASTIER_INTEGRIN_SIGNALING                                             | 51  | Up   | 0.040221944 | 0.173572042 |
| 1096 | GAVIN_FOXP3_TARGETS_CLUSTER_T4                                        | 83  | Up   | 0.040224632 | 0.173572042 |
| 1097 | SCHAEFFER_SOX9_TARGETS_IN_PROSTATE_DEVELOPMENT_DN                     | 40  | Down | 0.040369784 | 0.174039442 |

|      | A                                                       | B          | C         | D                  | E                  |
|------|---------------------------------------------------------|------------|-----------|--------------------|--------------------|
| 1098 | LANDIS_ERBB2_BREAST_TUMORS_324_UP                       | 140        | Up        | 0.040426365        | 0.174124498        |
| 1099 | ONGUSAHA_TP53_TARGETS                                   | 31         | Up        | 0.040531822        | 0.174382214        |
| 1100 | ST_INTERLEUKIN_4_PATHWAY                                | 21         | Up        | 0.040560011        | 0.174382214        |
| 1101 | CHIARADONNA_NEOPLASTIC_TRANSFORMATION_KRAS_CDC25_UP     | 50         | Up        | 0.040682418        | 0.174483565        |
| 1102 | MOOTHA_GLYCOLYSIS                                       | 17         | Down      | 0.040768219        | 0.174483565        |
| 1103 | TING_SILENCED_BY_DICER                                  | 22         | Up        | 0.040793422        | 0.174483565        |
| 1104 | REACTOME_SIGNALING_BY_FGFR1_MUTANTS                     | 22         | Down      | 0.040822521        | 0.174483565        |
| 1105 | JIANG_AGING_CEREBRAL_CORTEX_DN                          | 48         | Down      | 0.040828954        | 0.174483565        |
| 1106 | REN_BOUND_BY_E2F                                        | 60         | Down      | 0.040839175        | 0.174483565        |
| 1107 | BIOCARTA_G2_PATHWAY                                     | 24         | Down      | 0.040842079        | 0.174483565        |
| 1108 | <b>NIELSEN_GIST_AND_SYNOVIAL_SARCOMA_DN</b>             | <b>6</b>   | <b>Up</b> | <b>0.040962944</b> | <b>0.174824766</b> |
| 1109 | VETTER_TARGETS_OF_PRKCA_AND_ETS1_UP                     | 14         | Up        | 4.10E-02           | 1.75E-01           |
| 1110 | PID_RHOA_REG_PATHWAY                                    | 45         | Down      | 4.11E-02           | 1.75E-01           |
| 1111 | GAURNIER_PSM4_TARGETS                                   | 31         | Up        | 0.041160639        | 0.175210829        |
| 1112 | KYNG_ENVIRONMENTAL_STRESS_RESPONSE_NOT_BY_GAMMA_IN_OLD  | 28         | Up        | 0.04127209         | 0.175527116        |
| 1113 | IVANOVA_HEMATOPOIESIS_INTERMEDIATE_PROGENITOR           | 138        | Up        | 0.041325015        | 0.175594152        |
| 1114 | LY_AGING_PREMATURE_DN                                   | 26         | Down      | 0.041380232        | 0.175670795        |
| 1115 | <b>FLECHNER_BIOPSY_KIDNEY_TRANSPLANT_OK_VS_DONOR_UP</b> | <b>508</b> | <b>Up</b> | <b>0.041522175</b> | <b>0.176115151</b> |
| 1116 | LINDGREN_BLADDER_CANCER_WITH_LOH_IN_CHR9Q               | 113        | Up        | 0.041646496        | 0.176391801        |
| 1117 | BIDUS_METASTASIS_UP                                     | 209        | Down      | 0.041697758        | 0.176391801        |
| 1118 | KORKOLA_TERATOMA_UP                                     | 11         | Up        | 0.041699395        | 0.176391801        |
| 1119 | MARIADASON_RESPONSE_TO_BUTYRATE_SULINDAC_6              | 50         | Down      | 0.041796642        | 0.17641369         |
| 1120 | GARGALOVIC_RESPONSE_TO_OXIDIZED_PHOSPHOLIPIDS_YELLOW_UP | 32         | Up        | 0.041813608        | 0.17641369         |
| 1121 | HESS_TARGETS_OF_HOXA9_AND_MEIS1_UP                      | 60         | Up        | 0.041831217        | 0.17641369         |
| 1122 | BRIDEAU_IMPRINTED_GENES                                 | 41         | Up        | 0.041853915        | 0.17641369         |



|      | A                                                           | B   | C    | D           | E           |
|------|-------------------------------------------------------------|-----|------|-------------|-------------|
| 1123 | MATZUK_STEROIDOGENESIS                                      | 6   | Up   | 0.04192867  | 0.17657127  |
| 1124 | WANG_ESOPHAGUS_CANCER_PROGRESSION_UP                        | 7   | Up   | 0.042014256 | 0.176774142 |
| 1125 | LIEN_BREAST_CARCINOMA_METAPLASTIC_VS_D<br>UCTAL_DN          | 74  | Up   | 0.042399457 | 0.178148751 |
| 1126 | DING_LUNG_CANCER_BY_MUTATION_RATE                           | 15  | Down | 0.042416369 | 0.178148751 |
| 1127 | GOZGIT_ESR1_TARGETS_DN                                      | 601 | Up   | 0.042487601 | 0.178289443 |
| 1128 | PID_FOXO_PATHWAY                                            | 46  | Down | 0.042598737 | 0.178597191 |
| 1129 | LEE_AGING_CEREBELLUM_DN                                     | 65  | Up   | 0.042677235 | 0.178767672 |
| 1130 | KEGG_SPHINGOLIPID_METABOLISM                                | 32  | Up   | 0.042720054 | 0.178788532 |
| 1131 | BIOCARTA_INTEGRIN_PATHWAY                                   | 37  | Up   | 0.043053532 | 0.180024726 |
| 1132 | TIEN_INTESTINE_PROBIOTICS_2HR_DN                            | 85  | Up   | 0.043172519 | 0.180362646 |
| 1133 | PID_INTEGRIN5_PATHWAY                                       | 13  | Up   | 0.04322273  | 0.180412898 |
| 1134 | REACTOME_GLYCOSPHINGOLIPID_METABOLISM                       | 30  | Up   | 0.043307085 | 0.180605451 |
| 1135 | BOCHKIS_FOXA2_TARGETS                                       | 336 | Up   | 0.043425614 | 0.180782143 |
| 1136 | COLLER_MYC_TARGETS_UP                                       | 24  | Down | 0.043425975 | 0.180782143 |
| 1137 | ACOSTA_PROLIFERATION_INDEPENDENT_MYC_T<br>ARGETS_UP         | 84  | Up   | 0.043482157 | 0.180856683 |
| 1138 | HASLINGER_B_CLL_WITH_17P13_DELETION                         | 21  | Down | 0.043527894 | 0.180887686 |
| 1139 | YU_MYC_TARGETS_UP                                           | 42  | Down | 0.043892585 | 0.182242938 |
| 1140 | KAAB_HEART_ATRIUM_VS_VENTRICLE_UP                           | 208 | Up   | 0.043948352 | 0.182314277 |
| 1141 | ROSS_AML_WITH_MLL_FUSIONS                                   | 59  | Up   | 0.044017516 | 0.18244102  |
| 1142 | SMID_BREAST_CANCER_ERBB2_UP                                 | 96  | Up   | 0.044094635 | 0.182600481 |
| 1143 | MARIADASON_RESPONSE_TO_BUTYRATE_CURC<br>UMIN_SULINDAC_TSA_1 | 9   | Up   | 0.044168771 | 0.182747324 |
| 1144 | KOBAYASHI_RESPONSE_TO_ROMIDEPSIN                            | 17  | Up   | 0.044288634 | 0.183082935 |
| 1145 | PARK_HSC_VS_MULTIPOTENT_PROGENITORS_UP                      | 16  | Up   | 0.044406741 | 0.18341071  |
| 1146 | PID_NFAT_TFPATHWAY                                          | 29  | Up   | 0.044475975 | 0.183420757 |
| 1147 | FERNANDEZ_BOUND_BY_MYC                                      | 157 | Up   | 0.04449111  | 0.183420757 |
| 1148 | ZHAN_MULTIPLE_MYELOMA_CD1_DN                                | 41  | Up   | 0.044525631 | 0.183420757 |
| 1149 | REACTOME_ACTIVATION_OF_GENES_BY_ATF4                        | 22  | Up   | 0.044640107 | 0.183732146 |

|      | A                                                                             | B   | C    | D           | E           |
|------|-------------------------------------------------------------------------------|-----|------|-------------|-------------|
| 1150 | MULLIGHAN_NPM1_SIGNATURE_3_DN                                                 | 135 | Up   | 4.48E-02    | 1.84E-01    |
| 1151 | WANG_ADIPOGENIC_GENES_REPRESSED_BY_SIR<br>T1                                  | 21  | Up   | 4.49E-02    | 1.85E-01    |
| 1152 | REACTOME_ELONGATION_ARREST_AND_RECOVER<br>Y                                   | 30  | Down | 0.045305798 | 0.185842121 |
| 1153 | BUYTAERT_PHOTODYNAMIC_THERAPY_STRESS_D<br>N                                   | 602 | Up   | 0.045341572 | 0.185842121 |
| 1154 | REACTOME_HIV_LIFE_CYCLE                                                       | 110 | Down | 0.045349411 | 0.185842121 |
| 1155 | ABRAMSON_INTERACT_WITH_AIRE                                                   | 43  | Down | 0.045474365 | 0.186192698 |
| 1156 | WU_HBX_TARGETS_3_UP                                                           | 16  | Up   | 0.045579315 | 0.186460833 |
| 1157 | LEE_LIVER_CANCER_SURVIVAL_UP                                                  | 118 | Up   | 0.045735881 | 0.186939478 |
| 1158 | HERNANDEZ_MITOTIC_ARREST_BY_DOCETAXEL_<br>2_UP                                | 47  | Up   | 0.045907592 | 0.187479147 |
| 1159 | RICKMAN_HEAD_AND_NECK_CANCER_C                                                | 44  | Up   | 0.046056556 | 0.187925068 |
| 1160 | OZANNE_AP1_TARGETS_DN                                                         | 4   | Up   | 0.046500299 | 0.189357895 |
| 1161 | GAUSSMANN_MLL_AF4_FUSION_TARGETS_B_D<br>N                                     | 6   | Up   | 0.046512804 | 0.189357895 |
| 1162 | BIOCARTA_SARS_PATHWAY                                                         | 7   | Down | 0.04652794  | 0.189357895 |
| 1163 | MOLENAAR_TARGETS_OF_CCND1_AND_CDK4_D<br>N                                     | 56  | Down | 0.046651853 | 0.189698799 |
| 1164 | PID_NCADHERIN_PATHWAY                                                         | 31  | Down | 0.046818396 | 0.189928701 |
| 1165 | REACTOME_ASSOCIATION_OF_TRIC_CCT_WITH_T<br>ARGET_PROTEINS_DURING_BIOSYNTHESIS | 26  | Down | 0.046854104 | 0.189928701 |
| 1166 | ST_IL_13_PATHWAY                                                              | 5   | Up   | 0.046856001 | 0.189928701 |
| 1167 | KEGG_HEDGEHOG_SIGNALING_PATHWAY                                               | 35  | Down | 0.046905603 | 0.189928701 |
| 1168 | PASINI_SUZ12_TARGETS_UP                                                       | 91  | Up   | 0.04695233  | 0.189928701 |
| 1169 | ISSAEVA_MLL2_TARGETS                                                          | 45  | Up   | 0.046989159 | 0.189928701 |
| 1170 | SENESE_HDAC1_AND_HDAC2_TARGETS_UP                                             | 184 | Up   | 0.047012725 | 0.189928701 |
| 1171 | MARSON_FOXP3_CORE_DIRECT_TARGETS                                              | 10  | Up   | 0.047029964 | 0.189928701 |
| 1172 | YAO_HOXA10_TARGETS_VIA_PROGESTERONE_U<br>P                                    | 55  | Up   | 0.047177782 | 0.190362954 |
| 1173 | BIOCARTA_STRESS_PATHWAY                                                       | 22  | Up   | 0.047259946 | 0.190531779 |

|      | A                                                                                                                 | B         | C         | D                  | E                  |
|------|-------------------------------------------------------------------------------------------------------------------|-----------|-----------|--------------------|--------------------|
| 1174 | PID_HNF3B_PATHWAY                                                                                                 | 26        | Up        | 0.047379111        | 0.190849362        |
| 1175 | LEE_LIVER_CANCER_HEPATOBLAST                                                                                      | 13        | Up        | 0.047571262        | 0.191325767        |
| 1176 | NIKOLSKY_BREAST_CANCER_20Q11_AMPLICON                                                                             | 29        | Up        | 0.047578365        | 0.191325767        |
| 1177 | ZHONG_SECRETOME_OF_LUNG_CANCER_AND_MACROPHAGE                                                                     | 68        | Up        | 0.047831742        | 0.192048914        |
| 1178 | DUNNE_TARGETS_OF_AML1_MTG8_FUSION_UP                                                                              | 28        | Up        | 0.047857803        | 0.192048914        |
| 1179 | REACTOME_APC_C_CDH1_MEDIATED_DEGRADATION_OF_CDC20_AND_OTHER_APC_C_CDH1_TARGETED_PROTEINS_IN_LATE_MITOSIS_EARLY_G1 | 63        | Down      | 0.047888075        | 0.192048914        |
| 1180 | FIGUEROA_AML_METHYLATION_CLUSTER_4_UP                                                                             | 95        | Up        | 0.047926539        | 0.192048914        |
| 1181 | YAO_TEMPORAL_RESPONSE_TO_PROGESTERONE_CLUSTER_11                                                                  | 97        | Up        | 0.047981668        | 0.192048914        |
| 1182 | REACTOME_CELL_CYCLE                                                                                               | 364       | Down      | 0.048002067        | 0.192048914        |
| 1183 | OZANNE_AP1_TARGETS_UP                                                                                             | 14        | Up        | 0.048293511        | 0.193051472        |
| 1184 | PYEON_HPV_POSITIVE_TUMORS_DN                                                                                      | 7         | Up        | 0.048349223        | 0.193110802        |
| 1185 | YAMANAKA_GLIOMASTOMA_SURVIVAL_UP                                                                                  | 8         | Up        | 0.048408434        | 0.193183997        |
| 1186 | FLECHNER_BIOPSY_KIDNEY_TRANSPLANT_REJECTED_VS_OK_DN                                                               | 482       | Up        | 0.04865493         | 0.194003837        |
| 1187 | VERNELL_RETINOBLASTOMA_PATHWAY_DN                                                                                 | 21        | Up        | 0.048735781        | 0.194162364        |
| 1188 | BROWNE_HCMV_INFECTION_10HR_DN                                                                                     | 51        | Up        | 0.048875275        | 0.194432693        |
| 1189 | GALIE_TUMOR_ANGIOGENESIS                                                                                          | 4         | Up        | 0.0489153          | 0.194432693        |
| 1190 | <b>GUILLAUMOND_KLF10_TARGETS_UP</b>                                                                               | <b>39</b> | <b>Up</b> | <b>0.048927605</b> | <b>0.194432693</b> |
| 1191 | KEGG_ECM_RECEPTOR_INTERACTION                                                                                     | 62        | Up        | 4.90E-02           | 1.94E-01           |
| 1192 | DIAZ_CHRONIC_MEYLOGENOUS_LEUKEMIA_DN                                                                              | 81        | Up        | 4.90E-02           | 1.95E-01           |
| 1193 | ZHU_CMV_24_HR_UP                                                                                                  | 89        | Up        | 0.049110519        | 0.194633726        |
| 1194 | BIOCARTA_RNA_PATHWAY                                                                                              | 10        | Up        | 0.049181097        | 0.194633726        |
| 1195 | BIOCARTA_EIF2_PATHWAY                                                                                             | 11        | Up        | 0.049183634        | 0.194633726        |
| 1196 | WEST_ADRENOCORTICAL_TUMOR_MARKERS_DN                                                                              | 12        | Down      | 0.049425627        | 0.195427687        |

|      | A                                                                         | B   | C    | D           | E           |
|------|---------------------------------------------------------------------------|-----|------|-------------|-------------|
| 1197 | BLUM_RESPONSE_TO_SALIRASIB_DN                                             | 329 | Down | 0.049583388 | 0.195800143 |
| 1198 | RUAN_RESPONSE_TO_TNF_DN                                                   | 64  | Up   | 0.049602703 | 0.195800143 |
| 1199 | YAGI_AML_WITH_11Q23_REARRANGED                                            | 299 | Up   | 0.049644786 | 0.195802684 |
| 1200 | WENG_POR_TARGETS_GLOBAL_DN                                                | 17  | Up   | 0.049802577 | 0.196261198 |
| 1201 | KIM_LRRC3B_TARGETS                                                        | 22  | Up   | 0.050018676 | 0.196948537 |
| 1202 | LINDSTEDT_DENDRITIC_CELL_MATURATION_C                                     | 57  | Up   | 0.050121543 | 0.197189252 |
| 1203 | WANG_HCP_PROSTATE_CANCER                                                  | 94  | Up   | 0.05017351  | 0.197229479 |
| 1204 | IRITANI_MAD1_TARGETS_DN                                                   | 46  | Down | 0.05043014  | 0.198073493 |
| 1205 | LAIHO_COLORECTAL_CANCER_SERRATED_DN                                       | 80  | Down | 0.050493296 | 0.19815683  |
| 1206 | ZHONG_SECRETOME_OF_LUNG_CANCER_AND_E<br>NDOTHELIUM                        | 57  | Up   | 0.050701055 | 0.198807041 |
| 1207 | STOSSI_RESPONSE_TO ESTRADIOL                                              | 28  | Down | 0.050815037 | 0.198931675 |
| 1208 | BIOCARTA_ACE2_PATHWAY                                                     | 7   | Up   | 0.050817044 | 0.198931675 |
| 1209 | ZHENG_BOUND_BY_FOXP3                                                      | 399 | Up   | 0.05106702  | 0.199736201 |
| 1210 | KAUFFMANN_DNA_REPAIR_GENES                                                | 216 | Down | 0.051107104 | 0.199736201 |
| 1211 | NADERI_BREAST_CANCER_PROGNOSIS_UP                                         | 43  | Down | 0.051211849 | 0.199980154 |
| 1212 | BIOCARTA_TNFR1_PATHWAY                                                    | 27  | Up   | 0.052046676 | 0.203072292 |
| 1213 | CHIARADONNA NEOPLASTIC TRANSFORMATION<br>_KRAS_DN                         | 125 | Up   | 0.052236259 | 0.203525615 |
| 1214 | LEE_LIVER_CANCER_CIPROFIBRATE_UP                                          | 41  | Up   | 0.052273373 | 0.203525615 |
| 1215 | SHAFFER_IRF4_TARGETS_IN_ACTIVATED_DENDRI<br>TIC_CELL                      | 62  | Up   | 0.052292084 | 0.203525615 |
| 1216 | TENEDINI_MEGAKARYOCYTE_MARKERS                                            | 46  | Up   | 0.052466129 | 0.204034946 |
| 1217 | WANG_SMARCE1_TARGETS_DN                                                   | 327 | Up   | 0.052561092 | 0.20423615  |
| 1218 | BIOCARTA_VIP_PATHWAY                                                      | 24  | Up   | 0.052650443 | 0.204415235 |
| 1219 | ST_GRANULE_CELL_SURVIVAL_PATHWAY                                          | 24  | Up   | 0.053058181 | 0.205829152 |
| 1220 | REACTOME_RNA_POL_II_TRANSCRIPTION_PRE_I<br>NITIATION_AND_PROMOTER_OPENING | 37  | Down | 0.053357156 | 0.206819166 |
| 1221 | REACTOME_FORMATION_OF_RNA_POL_II_ELON<br>GATION_COMPLEX                   | 40  | Down | 0.053446359 | 0.206995119 |
| 1222 | KAAB_FAILED_HEART_ATRIUM_UP                                               | 32  | Down | 0.053498273 | 0.207026485 |

|      | A                                                        | B         | C           | D                  | E                  |
|------|----------------------------------------------------------|-----------|-------------|--------------------|--------------------|
| 1223 | REACTOME_REGULATED_PROTEOLYSIS_OF_P75N<br>TR             | 10        | Up          | 0.053829069        | 0.208136131        |
| 1224 | REACTOME_SPHINGOLIPID_METABOLISM                         | 56        | Up          | 0.054045661        | 0.208802738        |
| 1225 | LUCAS_HNF4A_TARGETS_UP                                   | 53        | Up          | 0.054469089        | 0.210266705        |
| 1226 | BIOCARTA_FAS_PATHWAY                                     | 29        | Up          | 0.05451682         | 0.210279164        |
| 1227 | NATSUME_RESPONSE_TO_INTERFERON_BETA_U<br>P               | 56        | Up          | 0.054818026        | 0.211064707        |
| 1228 | MATTIOLI_MULTIPLE_MYELOMA_WITH_14Q32_T<br>RANSLOCATIONS  | 27        | Up          | 0.054840005        | 0.211064707        |
| 1229 | RICKMAN_TUMOR_DIFFERENTIATED_WELL_VS_P<br>OORLY_DN       | 318       | Up          | 0.054913682        | 0.211064707        |
| 1230 | MORI_PRE_BI_LYMPHOCYTE_DN                                | 62        | Up          | 0.054921938        | 0.211064707        |
| 1231 | <b>REACTOME_RNA_POL_II_PRE_TRANSCRIPTION_E<br/>VENTS</b> | <b>56</b> | <b>Down</b> | <b>0.054943828</b> | <b>0.211064707</b> |
| 1232 | BIOCARTA_P53_PATHWAY                                     | 16        | Up          | 5.50E-02           | 2.11E-01           |
| 1233 | CHYLA_CBFA2T3_TARGETS_UP                                 | 268       | Up          | 5.53E-02           | 2.12E-01           |
| 1234 | WANG_ESOPHAGUS_CANCER_VS_NORMAL_DN                       | 90        | Up          | 0.055392607        | 0.21227094         |
| 1235 | HEIDENBLAD_AMPLIFIED_IN_SOFT_TISSUE_CANC<br>ER           | 11        | Up          | 0.055463176        | 0.212369132        |
| 1236 | KEGG_ALPHA_LINOLENIC_ACID_METABOLISM                     | 9         | Up          | 0.055559934        | 0.212567358        |
| 1237 | VECCHI_GASTRIC_CANCER_EARLY_DN                           | 236       | Up          | 0.055754933        | 0.212975339        |
| 1238 | <b>ALONSO_METASTASIS_NEURAL_UP</b>                       | <b>16</b> | <b>Up</b>   | <b>0.055756718</b> | <b>0.212975339</b> |
| 1239 | BIOCARTA_CASPASE_PATHWAY                                 | 18        | Up          | 0.055970183        | 0.213618024        |
| 1240 | KEGG_THYROID_CANCER                                      | 25        | Down        | 0.056333466        | 0.214831013        |
| 1241 | JOHNSTONE_PARVB_TARGETS_1_DN                             | 61        | Up          | 0.056469606        | 0.215176523        |
| 1242 | SWEET_KRAS_TARGETS_DN                                    | 49        | Up          | 0.056640817        | 0.215655002        |
| 1243 | ZHENG_IL22_SIGNALING_UP                                  | 32        | Up          | 0.056867871        | 0.216345162        |
| 1244 | NIKOLSKY_BREAST_CANCER_17Q21_Q25_AMPLIC<br>ON            | 248       | Down        | 0.057036804        | 0.216602289        |
| 1245 | ROYLANCE_BREAST_CANCER_16Q_COPY_NUMBE<br>R_DN            | 17        | Up          | 0.057052781        | 0.216602289        |
| 1246 | MANTOVANI_NFKB_TARGETS_UP                                | 30        | Up          | 0.057072984        | 0.216602289        |

|      | A                                                                                 | B   | C    | D           | E           |
|------|-----------------------------------------------------------------------------------|-----|------|-------------|-------------|
| 1247 | MMS_MOUSE_LYMPH_HIGH_4HRS_UP                                                      | 34  | Up   | 0.057486611 | 0.21799698  |
| 1248 | WEIGEL_OXIDATIVE_STRESS_BY_HNE_AND_H2O2                                           | 35  | Up   | 0.057600136 | 0.21825232  |
| 1249 | IWANAGA_CARCIANOGENESIS_BY_KRAS_UP                                                | 139 | Up   | 0.057925353 | 0.21930873  |
| 1250 | LIU_TOPBP1_TARGETS                                                                | 11  | Down | 0.058438944 | 0.221028601 |
| 1251 | BANDRES_RESPONSE_TO_CARMUSTIN_WITHOUT_MGMT_48HR_DN                                | 25  | Up   | 0.058473175 | 0.221028601 |
| 1252 | SESTO_RESPONSE_TO_UV_C3                                                           | 17  | Up   | 0.058639159 | 0.221478837 |
| 1253 | DELPUECH_FOXO3_TARGETS_UP                                                         | 64  | Up   | 0.058704116 | 0.221547081 |
| 1254 | LE_NEURONAL_DIFFERENTIATION_DN                                                    | 19  | Down | 0.058793944 | 0.221709009 |
| 1255 | REACTOME_IMMUNOREGULATORY_INTERACTIONS_BETWEEN_A_LYMPHOID_AND_A_NON_LYMPHOID_CELL | 21  | Up   | 0.058868704 | 0.221813895 |
| 1256 | MIKI_COEXPRESSED_WITH_CYP19A1                                                     | 5   | Down | 0.059022033 | 0.22212665  |
| 1257 | MANTOVANI_VIRAL_GPCR_SIGNALING_UP                                                 | 61  | Up   | 0.059096822 | 0.22212665  |
| 1258 | ZHANG_TLX_TARGETS_DN                                                              | 87  | Down | 0.05917047  | 0.22212665  |
| 1259 | KORKOLA_YOLK_SAC_TUMOR_UP                                                         | 20  | Up   | 0.059171924 | 0.22212665  |
| 1260 | SAMOLS_TARGETS_OF_KHSV_MIRNAS_UP                                                  | 8   | Up   | 0.059186762 | 0.22212665  |
| 1261 | REACTOME_CS_DS_DEGRADATION                                                        | 11  | Up   | 0.059397439 | 0.222679649 |
| 1262 | BIOCARTA_TEL_PATHWAY                                                              | 18  | Down | 0.059428368 | 0.222679649 |
| 1263 | LEE_EARLY_T_LYMPHOCYTE_DN                                                         | 42  | Up   | 0.05964728  | 0.222904002 |
| 1264 | REACTOME_MRNA_DECAY_BY_5_TO_3_EXORIBONUCLEASE                                     | 14  | Down | 0.059653936 | 0.222904002 |
| 1265 | WALLACE_PROSTATE_CANCER_RACE_DN                                                   | 74  | Up   | 0.059672276 | 0.222904002 |
| 1266 | SA_FAS_SIGNALING                                                                  | 7   | Up   | 0.059697783 | 0.222904002 |
| 1267 | ZHANG_TLX_TARGETS_60HR_UP                                                         | 269 | Up   | 0.05972412  | 0.222904002 |
| 1268 | LEIN_ASTROCYTE_MARKERS                                                            | 33  | Up   | 0.0600848   | 0.223910456 |
| 1269 | SEIDEN_ONCOGENESIS_BY_MET                                                         | 86  | Up   | 0.060088563 | 0.223910456 |
| 1270 | SHIN_B_CELL_LYMPHOMA_CLUSTER_2                                                    | 25  | Up   | 0.060720599 | 0.226087336 |
| 1271 | YAGI_AML_SURVIVAL                                                                 | 110 | Up   | 0.060897009 | 0.226565644 |
| 1272 | GRAHAM_CML_QUIESCENT_VS_NORMAL_QUIESCENT_DN                                       | 31  | Up   | 0.061003355 | 0.226782733 |

|      | A                                                    | B   | C    | D           | E           |
|------|------------------------------------------------------|-----|------|-------------|-------------|
| 1273 | PID_FOXM1_PATHWAY                                    | 37  | Down | 6.11E-02    | 2.27E-01    |
| 1274 | BROWNE_HCMV_INFECTION_16HR_DN                        | 73  | Up   | 6.18E-02    | 2.29E-01    |
| 1275 | BIOCARTA_P53HYPOXIA_PATHWAY                          | 21  | Up   | 0.061815133 | 0.229217929 |
| 1276 | BROWNE_HCMV_INFECTION_18HR_DN                        | 140 | Up   | 0.061874588 | 0.229217929 |
| 1277 | TERAMOTO_OPN_TARGETS_CLUSTER_3                       | 5   | Up   | 0.061900969 | 0.229217929 |
| 1278 | RUTELLA_RESPONSE_TO_CSF2RB_AND_IL4_DN                | 251 | Up   | 0.062006113 | 0.229409255 |
| 1279 | ACEVEDO_FGFR1_TARGETS_IN_PROSTATE_CANCER_MODEL_DN    | 227 | Up   | 0.062077761 | 0.229409255 |
| 1280 | HOLLEMAN_PREDNISOLONE_RESISTANCE_B_ALL_UP            | 22  | Down | 0.062098293 | 0.229409255 |
| 1281 | BERENJENO_TRANSFORMED_BY_RHOA_FOREVER_UP             | 14  | Up   | 0.06230318  | 0.229809924 |
| 1282 | BOYAUULT_LIVER_CANCER_SUBCLASS_G6_UP                 | 60  | Up   | 0.062304024 | 0.229809924 |
| 1283 | YAMASHITA_LIVER_CANCER_WITH_EPCAM_UP                 | 47  | Down | 0.062423484 | 0.230070954 |
| 1284 | LEE_METASTASIS_AND_ALTERNATIVE_SPLICING_DN           | 40  | Up   | 0.062761099 | 0.230956367 |
| 1285 | KIM_BIPOLAR_DISORDER_OLIGODENDROCYTE_DENSITY_CORR_DN | 35  | Up   | 0.062761476 | 0.230956367 |
| 1286 | ZHOU_TNF_SIGNALING_4HR                               | 52  | Up   | 0.062901956 | 0.231293184 |
| 1287 | CROONQUIST_NRAS_VS_STROMAL_STIMULATION_DN            | 93  | Down | 0.063122049 | 0.231757594 |
| 1288 | HUMMERICH_MALIGNANT_SKIN_TUMOR_UP                    | 7   | Up   | 0.063126354 | 0.231757594 |
| 1289 | HOWLIN_CITED1_TARGETS_2_DN                           | 13  | Up   | 0.063225655 | 0.23194194  |
| 1290 | REACTOME_LATE_PHASE_OF_HIV_LIFE_CYCLE                | 98  | Down | 0.063463124 | 0.232632477 |
| 1291 | NIKOLSKY_BREAST_CANCER_16P13_AMPLICON                | 92  | Down | 0.063539318 | 0.232731221 |
| 1292 | SABATES_COLORECTAL_ADENOMA_UP                        | 68  | Up   | 0.063689988 | 0.233098186 |
| 1293 | HOWLIN_PUBERTAL_MAMMARY_GLAND                        | 36  | Up   | 0.063749551 | 0.233098186 |
| 1294 | REACTOME_LYSOSOME_VESICLE_BIOGENESIS                 | 23  | Up   | 0.063810657 | 0.233098186 |
| 1295 | WHITEHURST_PACLITAXEL_SENSITIVITY                    | 29  | Down | 0.063836837 | 0.233098186 |
| 1296 | JOHANSSON_BRAIN_CANCER_EARLY_VS_LATE_DN              | 42  | Up   | 0.063978275 | 0.233274475 |
| 1297 | MAHADEVAN_IMATINIB_RESISTANCE_UP                     | 14  | Up   | 0.063983856 | 0.233274475 |

|      | A                                                 | B        | C           | D                  | E                  |
|------|---------------------------------------------------|----------|-------------|--------------------|--------------------|
| 1298 | MYLLYKANGAS_AMPLIFICATION_HOT_SPOT_29             | 5        | Up          | 0.064042173        | 0.233295001        |
| 1299 | CHIANG_LIVER_CANCER_SUBCLASS_INTERFERON_DN        | 37       | Up          | 0.064088235        | 0.233295001        |
| 1300 | UDAYAKUMAR_MED1_TARGETS_UP                        | 133      | Up          | 0.064852892        | 0.235896778        |
| 1301 | TORCHIA_TARGETS_OF_EWSR1_FLI1_FUSION_UP           | 223      | Up          | 0.065235223        | 0.237104946        |
| 1302 | PETRETTO_HEART_MASS_QTL_CIS_UP                    | 24       | Up          | 0.065498948        | 0.237768454        |
| 1303 | PID_INTEGRIN2_PATHWAY                             | 13       | Up          | 0.065554027        | 0.237768454        |
| 1304 | WIKMAN_ASBESTOS_LUNG_CANCER_DN                    | 19       | Down        | 0.065602538        | 0.237768454        |
| 1305 | SASSON_RESPONSE_TO_FORSKOLIN_UP                   | 83       | Up          | 0.06567118         | 0.237768454        |
| 1306 | SCHAEFFER_PROSTATE_DEVELOPMENT_48HR_UP            | 387      | Up          | 0.065725475        | 0.237768454        |
| 1307 | REACTOME_EXTRINSIC_PATHWAY_FOR_APOPTOSIS          | 9        | Up          | 0.065735963        | 0.237768454        |
| 1308 | ZHOU_PANCREATIC_EXOCRINE_PROGENITOR               | 6        | Down        | 0.065811536        | 0.237768454        |
| 1309 | ACEVEDO_FGFR1_TARGETS_IN_PROSTATE_CANCER_MODEL_UP | 215      | Up          | 0.065827189        | 0.237768454        |
| 1310 | BENPORATH_OCT4_TARGETS                            | 274      | Down        | 0.065927406        | 0.237768454        |
| 1311 | REACTOME_CELL_CYCLE_MITOTIC                       | 303      | Down        | 0.065936429        | 0.237768454        |
| 1312 | BARRIER_CANCER_RELAPSE_TUMOR_SAMPLE_UP            | 14       | Up          | 0.065971311        | 0.237768454        |
| 1313 | <b>HUMMERICH_BENIGN_SKIN_TUMOR_DN</b>             | <b>7</b> | <b>Down</b> | <b>0.066271333</b> | <b>0.238667721</b> |
| 1314 | BOYALT_LIVER_CANCER_SUBCLASS_G123_DN              | 37       | Up          | 6.66E-02           | 2.40E-01           |
| 1315 | SMID_BREAST_CANCER_RELAPSE_IN_LIVER_UP            | 2        | Down        | 6.68E-02           | 2.40E-01           |
| 1316 | GENTILE_UV_LOW_DOSE_UP                            | 25       | Down        | 0.067004688        | 0.240544317        |
| 1317 | BIOCARTA_CFTR_PATHWAY                             | 11       | Up          | 0.067029376        | 0.240544317        |
| 1318 | SWEET_LUNG_CANCER_KRAS_UP                         | 411      | Up          | 0.067055533        | 0.240544317        |
| 1319 | CHNG_MULTIPLE_MYELOMA_HYPERPLOID_UP               | 49       | Down        | 0.067097865        | 0.240544317        |
| 1320 | MEISSNER_NPC_ICP_WITH_H3_UNMETHYLATED             | 14       | Down        | 0.067181661        | 0.240662129        |
| 1321 | VALK_AML_CLUSTER_2                                | 22       | Up          | 0.067389971        | 0.241225464        |
| 1322 | MARTINEZ_RB1_AND_TP53_TARGETS_UP                  | 466      | Up          | 0.067783175        | 0.242348695        |
| 1323 | HAN_JNK_SIGNALING_DN                              | 28       | Up          | 0.067806344        | 0.242348695        |



|      | A                                                                | B   | C    | D           | E           |
|------|------------------------------------------------------------------|-----|------|-------------|-------------|
| 1324 | SMIRNOV_RESPONSE_TO_IR_2HR_UP                                    | 49  | Up   | 0.067957613 | 0.242673919 |
| 1325 | ZHU_CMV_8_HR_UP                                                  | 36  | Up   | 0.068000057 | 0.242673919 |
| 1326 | JOSEPH_RESPONSE_TO_SODIUM_BUTYRATE_UP                            | 27  | Up   | 0.068158601 | 0.243056143 |
| 1327 | CLIMENT_BREAST_CANCER_COPY_NUMBER_DN                             | 7   | Up   | 0.068443606 | 0.243888415 |
| 1328 | BEIER_GLIOMA_STEM_CELL_DN                                        | 61  | Up   | 0.068555171 | 0.244101871 |
| 1329 | SATO_SILENCED_BY_METHYLATION_IN_PANCREATIC_CANCER_1              | 285 | Up   | 0.068880626 | 0.245076024 |
| 1330 | WANG_NEOPLASTIC_TRANSFORMATION_BY_CCND1_MYC                      | 16  | Up   | 0.069047091 | 0.245139539 |
| 1331 | ZHAN_MULTIPLE_MYELOMA_DN                                         | 25  | Up   | 0.069049764 | 0.245139539 |
| 1332 | LEE_LIVER_CANCER_MYC_E2F1_DN                                     | 32  | Up   | 0.069054122 | 0.245139539 |
| 1333 | TOMLINS_METASTASIS_UP                                            | 13  | Down | 0.069155495 | 0.245231449 |
| 1334 | EBAUER_MYOGENIC_TARGETS_OF_PAX3_FOXO1_FUSION                     | 34  | Up   | 0.069231739 | 0.245231449 |
| 1335 | BIOCARTA_SALMONELLA_PATHWAY                                      | 13  | Up   | 0.069307268 | 0.245231449 |
| 1336 | KEGG_CELL_CYCLE                                                  | 116 | Down | 0.069368266 | 0.245231449 |
| 1337 | GAVIN_FOXP3_TARGETS_CLUSTER_P7                                   | 69  | Up   | 0.06938036  | 0.245231449 |
| 1338 | ELVIDGE_HIF1A_TARGETS_UP                                         | 66  | Up   | 0.069514985 | 0.245231449 |
| 1339 | DAZARD_UV_RESPONSE_CLUSTER_G6                                    | 150 | Down | 0.0695255   | 0.245231449 |
| 1340 | BIOCARTA_HIVNEF_PATHWAY                                          | 54  | Up   | 0.069542249 | 0.245231449 |
| 1341 | REACTOME_TRANSPORT_OF_VITAMINS_NUCLEOSIDES_AND_RELATED_MOLECULES | 22  | Up   | 0.06954712  | 0.245231449 |
| 1342 | REACTOME_UNFOLDED_PROTEIN_RESPONSE                               | 73  | Up   | 0.0696366   | 0.245363859 |
| 1343 | ZHANG_TLX_TARGETS_60HR_DN                                        | 269 | Down | 0.069951785 | 0.24629075  |
| 1344 | TARTE_PLASMA_CELL_VS_PLASMA_BLAST_UP                             | 256 | Up   | 0.070032864 | 0.246296095 |
| 1345 | HAHTOLA_MYCOSIS_FUNGOIDES_SKIN_DN                                | 24  | Up   | 0.070057556 | 0.246296095 |
| 1346 | ST_ERK1_ERK2_MAPK_PATHWAY                                        | 31  | Up   | 0.070233409 | 0.24673075  |
| 1347 | BENPORATH_ES_2                                                   | 40  | Down | 0.070378181 | 0.246955446 |
| 1348 | EHLERS_ANEUPLOIDY_UP                                             | 39  | Up   | 0.070401902 | 0.246955446 |
| 1349 | SABATES_COLORECTAL_ADENOMA_SIZE_DN                               | 10  | Up   | 0.070717541 | 0.247878621 |
| 1350 | PID_IL5_PATHWAY                                                  | 11  | Up   | 0.070943433 | 0.248486078 |

|      | A                                                                 | B          | C         | D                 | E                  |
|------|-------------------------------------------------------------------|------------|-----------|-------------------|--------------------|
| 1351 | HOEBEKE_LYMPHOID_STEM_CELL_DN                                     | 74         | Up        | 0.071317154       | 0.249571423        |
| 1352 | KIM_ALL_DISORDERS_DURATION_CORR_UP                                | 8          | Up        | 0.071368891       | 0.249571423        |
| 1353 | LU_TUMOR_ENDOTHELIAL_MARKERS_DN                                   | 2          | Down      | 0.07141176        | 0.249571423        |
| 1354 | <b>RAO_BOUND_BY_SALL4_ISOFORM_A</b>                               | <b>120</b> | <b>Up</b> | <b>0.07149385</b> | <b>0.249603685</b> |
| 1355 | TURASHVILI_BREAST_LOBULAR_CARCINOMA_VS_LOBULAR_NORMAL_UP          | 69         | Up        | 7.15E-02          | 2.50E-01           |
| 1356 | PETRETTO_LEFT_VENTRICLE_MASS_QTL_CIS_UP                           | 4          | Up        | 7.19E-02          | 2.51E-01           |
| 1357 | TONKS_TARGETS_OF_RUNX1_RUNX1T1_FUSION_SUSTAINED_IN_MONOCYTE_UP    | 16         | Up        | 0.071899421       | 0.250534486        |
| 1358 | RODRIGUES_DCC_TARGETS_UP                                          | 3          | Up        | 0.072189559       | 0.251360109        |
| 1359 | YEGNASUBRAMANIAN_PROSTATE_CANCER                                  | 92         | Up        | 0.072376024       | 0.251823793        |
| 1360 | REACTOME_METABOLISM_OF_STEROID_HORMONES_AND_VITAMINS_A_AND_D      | 15         | Up        | 0.072565717       | 0.252298023        |
| 1361 | GENTILE_UV_RESPONSE_CLUSTER_D6                                    | 34         | Down      | 0.072784848       | 0.252873829        |
| 1362 | MARKEY_RB1_ACUTE_LOF_UP                                           | 223        | Down      | 0.073096791       | 0.253588061        |
| 1363 | LUI_THYROID_CANCER_PAX8_PPARG_DN                                  | 42         | Up        | 0.073123376       | 0.253588061        |
| 1364 | GEORGES_TARGETS_OF_MIR192_AND_MIR215                              | 848        | Up        | 0.073151434       | 0.253588061        |
| 1365 | REACTOME_DEADENYLATION_OF_MRNA                                    | 19         | Down      | 0.073379674       | 0.254192785        |
| 1366 | MORI_EMU_MYC_LYMPHOMA_BY_ONSET_TIME_DN                            | 15         | Up        | 0.073509114       | 0.254394489        |
| 1367 | MORI_SMALL_PRE_BII_LYMPHOCYTE_DN                                  | 65         | Up        | 0.073619982       | 0.254394489        |
| 1368 | REACTOME_O_LINKED_GLYCOSYLATION_OF_MUCINS                         | 35         | Up        | 0.073623311       | 0.254394489        |
| 1369 | LIU_IL13_MEMORY_MODEL_DN                                          | 5          | Up        | 0.07370417        | 0.254394489        |
| 1370 | BIOCARTA_FEEDER_PATHWAY                                           | 7          | Down      | 0.073707102       | 0.254394489        |
| 1371 | GILDEA_METASTASIS                                                 | 27         | Up        | 0.073835171       | 0.2546505          |
| 1372 | PLASARI_TGFB1_TARGETS_10HR_DN                                     | 181        | Up        | 0.073948861       | 0.254856579        |
| 1373 | IZADPANAH_STEM_CELL_ADIPOSE_VS_BONE_DN                            | 90         | Up        | 0.074370268       | 0.256022282        |
| 1374 | REACTOME_CLEAVAGE_OF_GROWING_TRANSCRIPT_IN_THE_TERMINATION_REGION | 43         | Down      | 0.074395469       | 0.256022282        |

|      | A                                                          | B   | C    | D           | E           |
|------|------------------------------------------------------------|-----|------|-------------|-------------|
| 1375 | ROSS_ACUTE_MYELOID_LEUKEMIA_CBF                            | 66  | Up   | 0.074554737 | 0.256206781 |
| 1376 | ZHENG_FOXP3_TARGETS_IN_THYMUS_DN                           | 8   | Up   | 0.074557529 | 0.256206781 |
| 1377 | WAESCH_ANAPHASE_PROMOTING_COMPLEX                          | 11  | Down | 0.074687876 | 0.256468179 |
| 1378 | SEMBA_FHIT_TARGETS_DN                                      | 10  | Down | 0.074865256 | 0.256890584 |
| 1379 | BILANGES_SERUM_AND_RAPAMYCIN_SENSITIVE_GENES               | 65  | Down | 0.074931222 | 0.256930353 |
| 1380 | VERRECCHIA_RESPONSE_TO_TGFB1_C4                            | 12  | Down | 0.07503108  | 0.257030545 |
| 1381 | BIOCARTA_SRCRPT_PATHWAY                                    | 11  | Down | 0.075069239 | 0.257030545 |
| 1382 | GYORFFY_DOXORUBICIN_RESISTANCE                             | 41  | Up   | 0.075194162 | 0.257192497 |
| 1383 | SMIRNOV_RESPONSE_TO_IR_6HR_DN                              | 92  | Down | 0.075225403 | 0.257192497 |
| 1384 | PID_INTEGRIN_CS_PATHWAY                                    | 16  | Up   | 0.075311664 | 0.257301237 |
| 1385 | MANTOVANI_NFKB_TARGETS_DN                                  | 9   | Up   | 0.075400998 | 0.257420315 |
| 1386 | HOEBEKE_LYMPHOID_STEM_CELL_UP                              | 78  | Down | 0.075508557 | 0.257601395 |
| 1387 | REACTOME_HEMOSTASIS                                        | 322 | Up   | 0.07562307  | 0.257783393 |
| 1388 | KEGG_PATHOGENIC_ESCHERICHIA_COLI_INFECTI<br>ON             | 44  | Up   | 0.075671019 | 0.257783393 |
| 1389 | TURASHVILI_BREAST_DUCTAL_CARCINOMA_VS_<br>DUCTAL_NORMAL_UP | 38  | Up   | 0.075807056 | 0.258060764 |
| 1390 | MISSIAGLIA_REGULATED_BY_METHYLATION_DN                     | 117 | Down | 0.076014567 | 0.25858087  |
| 1391 | WANG_RESPONSE_TO_GSK3_INHIBITOR_SB2167<br>63_UP            | 301 | Up   | 0.076415462 | 0.259346725 |
| 1392 | KEGG_PANTOTHENATE_AND_COA_BIOSYNTHESIS                     | 11  | Up   | 0.076440548 | 0.259346725 |
| 1393 | FRASOR_RESPONSE_TO_SERM_OR_FULVESTРАН<br>T_DN              | 48  | Down | 0.076446349 | 0.259346725 |
| 1394 | HASLINGER_B_CLL_WITH_CHROMOSOME_12_TRI<br>SOMY             | 21  | Up   | 0.076490831 | 0.259346725 |
| 1395 | MILICIC_FAMILIAL_ADENOMATOUS_POLYPOSIS_<br>DN              | 4   | Up   | 0.076514145 | 0.259346725 |
| 1396 | KIM_MYC_AMPLIFICATION_TARGETS_DN                           | 88  | Up   | 7.67E-02    | 2.60E-01    |

|      | A                                                   | B   | C    | D           | E           |
|------|-----------------------------------------------------|-----|------|-------------|-------------|
| 1397 | MIKKELSEN_ES_LCP_WITH_H3K4ME3_AND_H3K27ME3          | 4   | Down | 7.69E-02    | 2.60E-01    |
| 1398 | BASSO_B_LYMPHOCYTE_NETWORK                          | 133 | Up   | 0.076919506 | 0.259924222 |
| 1399 | MILI_PSEUDOPODIA_CHEMOTAXIS_DN                      | 444 | Up   | 0.076955464 | 0.259924222 |
| 1400 | KOKKINAKIS_METHIONINE_DEPRIVATION_96HR_DN           | 69  | Up   | 0.076959574 | 0.259924222 |
| 1401 | FERREIRA_EWINGS_SARCOMA_UNSTABLE_VS_S<br>TABLE_UP   | 155 | Down | 0.077382    | 0.261105099 |
| 1402 | PARK_HSC_MARKERS                                    | 36  | Down | 0.077419734 | 0.261105099 |
| 1403 | ABE_VEGFA_TARGETS                                   | 12  | Up   | 0.077868106 | 0.262429958 |
| 1404 | MULLIGHAN_NPM1_MUTATED_SIGNATURE_1_D<br>N           | 106 | Up   | 0.078155125 | 0.262714596 |
| 1405 | DEBIASI_APOPTOSIS_BY_REOVIRUS_INFECTION_<br>UP      | 279 | Up   | 0.078156566 | 0.262714596 |
| 1406 | REACTOME_MYOGENESIS                                 | 20  | Down | 0.078159248 | 0.262714596 |
| 1407 | GAL_LEUKEMIC_STEM_CELL_DN                           | 158 | Down | 0.078174968 | 0.262714596 |
| 1408 | MOHANKUMAR_TLX1_TARGETS_DN                          | 131 | Up   | 0.078435884 | 0.263404089 |
| 1409 | VANDESLUIS_NORMAL_EMBRYOS_DN                        | 15  | Down | 0.078522906 | 0.263454721 |
| 1410 | REACTOME_BRANCHED_CHAIN_AMINO_ACID_CA<br>TABOLISM   | 17  | Up   | 0.078562477 | 0.263454721 |
| 1411 | SCHRAMM_INHBA_TARGETS_UP                            | 6   | Up   | 0.078714833 | 0.263778431 |
| 1412 | PID_BETA_CATENIN_DEG_PATHWAY                        | 17  | Down | 0.078883074 | 0.264123858 |
| 1413 | YAO_TEMPORAL_RESPONSE_TO_PROGESTERON<br>E_CLUSTER_8 | 41  | Up   | 0.078929711 | 0.264123858 |
| 1414 | AIYAR_COBRA1_TARGETS_UP                             | 32  | Up   | 0.079104817 | 0.264356519 |
| 1415 | REACTOME_GLYCOLYSIS                                 | 24  | Down | 0.079111136 | 0.264356519 |
| 1416 | WAMUNYOKOLI_OVARIAN_CANCER_LMP_DN                   | 181 | Up   | 0.079361365 | 0.264727002 |
| 1417 | SENGUPTA_NASOPHARYNGEAL_CARCINOMA_DN                | 193 | Up   | 0.079373952 | 0.264727002 |
| 1418 | MULLIGHAN_MLL_SIGNATURE_1_UP                        | 317 | Up   | 0.079390087 | 0.264727002 |
| 1419 | DORN_ADENOVIRUS_INFECTION_12HR_UP                   | 25  | Up   | 0.079568222 | 0.264885813 |
| 1420 | XU_HGF_TARGETS_INDUCED_BY_AKT1_6HR                  | 17  | Up   | 0.079611318 | 0.264885813 |

|      | A                                                                                          | B         | C           | D                  | E                  |
|------|--------------------------------------------------------------------------------------------|-----------|-------------|--------------------|--------------------|
| 1421 | MISHRA_CARINOMA_ASSOCIATED_FIBROBLAST_DN                                                   | 22        | Up          | 0.079634006        | 0.264885813        |
| 1422 | KIM_GERMINAL_CENTER_T_HELPER_UP                                                            | 59        | Up          | 0.079661955        | 0.264885813        |
| 1423 | WONG_ENDOMETRIAL_CANCER_LATE                                                               | 3         | Down        | 0.079829405        | 0.265255934        |
| 1424 | KEGG_DRUG_METABOLISM_CYTOCHROME_P450                                                       | 23        | Up          | 0.079969851        | 0.265535871        |
| 1425 | WONG_EMBRYONIC_STEM_CELL_CORE                                                              | 334       | Down        | 0.080099343        | 0.265779069        |
| 1426 | NABA_ECM_REGULATORS                                                                        | 131       | Up          | 0.080217895        | 0.265985651        |
| 1427 | FOURNIER_ACINAR_DEVELOPMENT_LATE_DN                                                        | 21        | Up          | 0.080465075        | 0.266575562        |
| 1428 | BIOCARTA_EXTRINSIC_PATHWAY                                                                 | 4         | Up          | 0.080508641        | 0.266575562        |
| 1429 | FERRARI_RESPONSE_TO_FENRETINIDE_DN                                                         | 3         | Up          | 0.080644801        | 0.266839416        |
| 1430 | SERVITJA_LIVER_HNF1A_TARGETS_UP                                                            | 106       | Up          | 0.080784645        | 0.266902634        |
| 1431 | GAZIN_EPIGENETIC_SILENCING_BY_KRAS                                                         | 23        | Down        | 0.08079224         | 0.266902634        |
| 1432 | DIERICK_SEROTONIN_FUNCTION_GENES                                                           | 3         | Up          | 0.080833369        | 0.266902634        |
| 1433 | KEGG_LEISHMANIA_INFECTON                                                                   | 45        | Up          | 0.081111531        | 0.267452319        |
| 1434 | PID_RHOA_PATHWAY                                                                           | 42        | Up          | 0.081113052        | 0.267452319        |
| 1435 | RIGGI_EWING_SARCOMA_PROGENITOR_UP                                                          | 334       | Up          | 0.081341492        | 0.268018513        |
| 1436 | <b>MEDINA_SMARCA4_TARGETS</b>                                                              | <b>36</b> | <b>Down</b> | <b>0.081643199</b> | <b>0.268825166</b> |
| 1437 | ZHAN_MULTIPLE_MYELOMA_HP_UP                                                                | 36        | Down        | 8.18E-02           | 2.69E-01           |
| 1438 | REACTOME_ABACAVIR_TRANSPORT_AND_META<br>BOLISM                                             | 6         | Up          | 8.20E-02           | 2.69E-01           |
| 1439 | IVANOVA_HEMATOPOIESIS_MATURE_CELL                                                          | 252       | Up          | 0.082017959        | 0.269495728        |
| 1440 | NEBEN_AML_WITH_FLT3_OR_NRAS_DN                                                             | 12        | Up          | 0.082155638        | 0.269760522        |
| 1441 | GRAHAM_CML_DIVIDING_VS_NORMAL QUIESCE<br>NT_DN                                             | 67        | Up          | 0.082261539        | 0.269920676        |
| 1442 | REACTOME_NEF_MEDIATED_DOWNREGULATION<br>OF_MHC_CLASS_I_COMPLEX_CELL_SURFACE_EX<br>PRESSION | 9         | Up          | 0.082776014        | 0.271388796        |
| 1443 | <b>REACTOME_PYRIMIDINE_CATABOLISM</b>                                                      | <b>6</b>  | <b>Up</b>   | <b>0.08282384</b>  | <b>0.271388796</b> |
| 1444 | LINDVALL_IMMORTALIZED_BY_TERT_DN                                                           | 62        | Up          | 0.082972381        | 0.271687111        |
| 1445 | REACTOME_CD28_DEPENDENT_PI3K_AKT_SIGNAL<br>ING                                             | 17        | Up          | 0.083114219        | 0.271963078        |

|      | A                                                        | B   | C    | D           | E           |
|------|----------------------------------------------------------|-----|------|-------------|-------------|
| 1446 | DARWICHE_PAPILLOMA_RISK_HIGH_VS_LOW_DN                   | 25  | Up   | 0.083258557 | 0.27224684  |
| 1447 | BOYLAN_MULTIPLE_MYELOMA_PCA1_DN                          | 7   | Up   | 0.083516236 | 0.272900564 |
| 1448 | VANDESLUIS_COMMD1_TARGETS_GROUP_2_UP                     | 14  | Up   | 0.083809671 | 0.273601939 |
| 1449 | GENTILE_UV_RESPONSE_CLUSTER_D9                           | 26  | Up   | 0.083846689 | 0.273601939 |
| 1450 | CHIN_BREAST_CANCER_COPY_NUMBER_DN                        | 13  | Down | 0.084050901 | 0.273956277 |
| 1451 | KEGG_NOTCH_SIGNALING_PATHWAY                             | 43  | Down | 0.084115565 | 0.273956277 |
| 1452 | ZHANG_ADIPOGENESIS_BY_BMP7                               | 14  | Up   | 0.084129219 | 0.273956277 |
| 1453 | REACTOME_NEGATIVE_REGULATION_OF_THE_PI<br>3K_AKT_NETWORK | 7   | Up   | 0.08419117  | 0.273969201 |
| 1454 | ONDER_CDH1_TARGETS_1_UP                                  | 128 | Up   | 0.084435232 | 0.274574309 |
| 1455 | WHITESIDE_CISPLATIN_RESISTANCE_UP                        | 11  | Up   | 0.084615248 | 0.274785194 |
| 1456 | MATZUK_LUTEAL_GENES                                      | 7   | Up   | 0.084616393 | 0.274785194 |
| 1457 | MEISSNER_BRAIN_HCP_WITH_H3K4ME2                          | 13  | Down | 0.085061272 | 0.275877961 |
| 1458 | ZHAN_MULTIPLE_MYELOMA_SPIKED                             | 14  | Up   | 0.08506967  | 0.275877961 |
| 1459 | KEGG_BETA_ALANINE_METABOLISM                             | 17  | Up   | 0.085220044 | 0.27617607  |
| 1460 | BILD_SRC_ONCOGENIC_SIGNATURE                             | 58  | Up   | 0.085458081 | 0.276757664 |
| 1461 | ROZANOV_MMP14_TARGETS_UP                                 | 221 | Up   | 0.08581354  | 0.277692627 |
| 1462 | ZHAN_MULTIPLE_MYELOMA_LB_DN                              | 29  | Up   | 0.085864323 | 0.277692627 |
| 1463 | KEGG_OOCYTE_MEIOSIS                                      | 95  | Down | 0.085995241 | 0.277826986 |
| 1464 | KYNG_DNA_DAMAGE_BY_4NQO_OR_GAMMA_R<br>ADIATION           | 13  | Up   | 0.086023467 | 0.277826986 |
| 1465 | STAMBOLSKY_TARGETS_OF_MUTATED_TP53_DN                    | 37  | Up   | 0.086382372 | 0.278795565 |
| 1466 | GROSS_HIF1A_TARGETS_DN                                   | 21  | Down | 0.08657186  | 0.279216409 |
| 1467 | BOQUEST_STEM_CELL_DN                                     | 160 | Up   | 0.086851103 | 0.279829734 |
| 1468 | REACTOME_SULFUR_AMINO_ACID_METABOLISM                    | 23  | Up   | 0.08688047  | 0.279829734 |
| 1469 | CAVARD_LIVER_CANCER_MALIGNANT_VS_BENIG<br>N              | 19  | Up   | 0.087121175 | 0.280261792 |
| 1470 | VALK_AML_CLUSTER_13                                      | 24  | Up   | 0.087220816 | 0.280261792 |

|      | A                                                       | B         | C         | D                  | E                  |
|------|---------------------------------------------------------|-----------|-----------|--------------------|--------------------|
| 1471 | KUUSELO_PANCREATIC_CANCER_19Q13_AMPLIFICATION           | 24        | Down      | 0.087227852        | 0.280261792        |
| 1472 | NIKOLSKY_BREAST_CANCER_5P15_AMPLICON                    | 20        | Down      | 0.087251872        | 0.280261792        |
| 1473 | MODY_HIPPOCAMPUS_POSTNATAL                              | 58        | Down      | 0.087799593        | 0.28169115         |
| 1474 | BIOCARTA_PS1_PATHWAY                                    | 12        | Down      | 0.087816098        | 0.28169115         |
| 1475 | REACTOME_CALNEXIN_CALRETICULIN_CYCLE                    | 11        | Up        | 0.088013937        | 0.281971946        |
| 1476 | RUAN_RESPONSE_TO_TNF_TROGLITAZONE_DN                    | 30        | Up        | 0.08805321         | 0.281971946        |
| 1477 | <b>YAN_ESCAPE_FROM_ANOIKIS</b>                          | <b>14</b> | <b>Up</b> | <b>0.088087056</b> | <b>0.281971946</b> |
| 1478 | KRASNOSELSKAYA_ILF3_TARGETS_UP                          | 26        | Up        | 8.81E-02           | 2.82E-01           |
| 1479 | PUJANA_CHEK2_PCC_NETWORK                                | 742       | Down      | 8.83E-02           | 2.82E-01           |
| 1480 | TANG_SENESCENCE_TP53_TARGETS_UP                         | 22        | Up        | 0.088682717        | 0.282946507        |
| 1481 | MYLLYKANGAS_AMPLIFICATION_HOT_SPOT_13                   | 6         | Down      | 0.088738214        | 0.282946507        |
| 1482 | PASQUALUCCI_LYMPHOMA_BY_GC_STAGE_UP                     | 261       | Up        | 0.088739886        | 0.282946507        |
| 1483 | KARAKAS_TGFB1_SIGNALING                                 | 13        | Down      | 0.088746397        | 0.282946507        |
| 1484 | MIZUKAMI_HYPOXIA_DN                                     | 4         | Up        | 0.089040313        | 0.283551635        |
| 1485 | MARIADASON_RESPONSE_TO_BUTYRATE_SULIN_DAC_4             | 20        | Up        | 0.089056217        | 0.283551635        |
| 1486 | PLASARI_TGFB1_TARGETS_1HR_DN                            | 5         | Up        | 0.089469125        | 0.284674489        |
| 1487 | VALK_AML_CLUSTER_4                                      | 23        | Up        | 0.089537261        | 0.284699569        |
| 1488 | BIOCARTA_TCYTOTOXIC_PATHWAY                             | 2         | Up        | 0.0896305          | 0.28480438         |
| 1489 | TURASHVILI_BREAST_LOBULAR_CARCINOMA_VS_DUCTAL_NORMAL_UP | 51        | Up        | 0.089833509        | 0.285257613        |
| 1490 | ROSS_AML_OF_FAB_M7_TYPE                                 | 59        | Up        | 0.090013765        | 0.285638037        |
| 1491 | AMUNDSON_GENOTOXIC_SIGNATURE                            | 86        | Down      | 0.090194411        | 0.285695408        |
| 1492 | ZHENG_RESPONSE_TO_ARSENITE_DN                           | 14        | Up        | 0.090218091        | 0.285695408        |
| 1493 | TURASHVILI_BREAST_LOBULAR_CARCINOMA_VS_DUCTAL_NORMAL_DN | 64        | Up        | 0.090268388        | 0.285695408        |
| 1494 | WANG_CLIM2_TARGETS_DN                                   | 175       | Up        | 0.090306427        | 0.285695408        |
| 1495 | PID_IL6_7_PATHWAY                                       | 42        | Up        | 0.090334167        | 0.285695408        |
| 1496 | MATZUK_IMPLANTATION_AND_UTERINE                         | 12        | Down      | 0.090464526        | 0.285878362        |
| 1497 | ACEVEDO_LIVER_CANCER_WITH_H3K27ME3_UP                   | 172       | Up        | 0.090516473        | 0.285878362        |
| 1498 | MALONEY_RESPONSE_TO_17AAG_DN                            | 78        | Down      | 0.090573525        | 0.285878362        |

|      | A                                               | B         | C         | D                  | E                  |
|------|-------------------------------------------------|-----------|-----------|--------------------|--------------------|
| 1499 | DACOSTA_ERCC3_ALLELE_XPCS_VS_TTD_DN             | 33        | Up        | 0.090911512        | 0.2867536          |
| 1500 | FULCHER_INFLAMMATORY_RESPONSE_LLECTIN_VS_LPS_DN | 362       | Up        | 0.091011251        | 0.286876693        |
| 1501 | LANDIS_ERBB2_BREAST_PRENEOPLASTIC_DN            | 47        | Up        | 0.091084065        | 0.286914806        |
| 1502 | DELLA_RESPONSE_TO_TSA_AND_BUTYRATE              | 19        | Down      | 0.091281501        | 0.287345166        |
| 1503 | RUIZ_TNC_TARGETS_UP                             | 135       | Up        | 0.091419455        | 0.287587832        |
| 1504 | YANG_MUC2_TARGETS_COLON_3MO_DN                  | 2         | Down      | 0.091532884        | 0.287753079        |
| 1505 | GALI_TP53_TARGETS_APOPTOTIC_UP                  | 6         | Up        | 0.091956486        | 0.288892551        |
| 1506 | PECE_MAMMARY_STEM_CELL_DN                       | 137       | Up        | 0.092366665        | 0.289988366        |
| 1507 | SIMBULAN_PARP1_TARGETS_UP                       | 26        | Up        | 0.092560792        | 0.290361921        |
| 1508 | BERENJENO_TRANSFORMED_BY_RHOA_FOREVER_DN        | 23        | Up        | 0.092651636        | 0.290361921        |
| 1509 | JAATINEN_HEMATOPOIETIC_STEM_CELL_UP             | 276       | Up        | 0.092713448        | 0.290361921        |
| 1510 | CHANG_CORE_SERUM_RESPONSE_UP                    | 208       | Up        | 0.092731458        | 0.290361921        |
| 1511 | ITO_PTTG1_TARGETS_UP                            | 10        | Up        | 0.09299318         | 0.290988593        |
| 1512 | GERHOLD_RESPONSE_TO_TZD_UP                      | 3         | Up        | 0.093284016        | 0.291705476        |
| 1513 | FAELT_B_CLL_WITH_VH3_21_UP                      | 42        | Down      | 0.093417921        | 0.291845443        |
| 1514 | HEDENFALK_BREAST_CANCER_BRCA1_VS_BRCA2          | 157       | Up        | 0.093461546        | 0.291845443        |
| 1515 | PID_TCR_JNK_PATHWAY                             | 11        | Up        | 0.093514074        | 0.291845443        |
| 1516 | HUANG_FOXA2_TARGETS_DN                          | 31        | Up        | 0.093631259        | 0.292018283        |
| 1517 | PEREZ_TP53_AND_TP63_TARGETS                     | 174       | Down      | 0.09371354         | 0.29208211         |
| 1518 | <b>CAFFAREL_RESPONSE_TO_THC_24HR_5_DN</b>       | <b>51</b> | <b>Up</b> | <b>0.093903484</b> | <b>0.292435718</b> |
| 1519 | JISON_SICKLE_CELL_DISEASE_DN                    | 164       | Down      | 9.40E-02           | 2.92E-01           |
| 1520 | VART_KSHV_INFECTION_ANGIOGENIC_MARKERS_UP       | 118       | Up        | 9.42E-02           | 2.93E-01           |
| 1521 | CHEMNITZ_RESPONSE_TO_PROSTAGLANDIN_E2_DN        | 322       | Up        | 0.094854606        | 0.294860536        |
| 1522 | BROWN_MYELOID_CELL_DEVELOPMENT_DN               | 106       | Up        | 0.095060857        | 0.295307396        |
| 1523 | PID_IL27_PATHWAY                                | 12        | Up        | 0.095285829        | 0.295811789        |
| 1524 | NGUYEN_NOTCH1_TARGETS_DN                        | 78        | Up        | 0.095513702        | 0.296324518        |
| 1525 | <b>KIM_MYCL1_AMPLIFICATION_TARGETS_DN</b>       | <b>18</b> | <b>Up</b> | <b>0.096214183</b> | <b>0.298265073</b> |



|      | A                                                 | B   | C    | D           | E           |
|------|---------------------------------------------------|-----|------|-------------|-------------|
| 1526 | SNIJDERS_AMPLIFIED_IN_HEAD_AND_NECK_TUMORS        | 31  | Up   | 0.096315865 | 0.298265073 |
| 1527 | KEGG_ALANINE_ASPARTATE_AND GLUTAMATE_METABOLISM   | 23  | Up   | 0.096402305 | 0.298265073 |
| 1528 | PHONG_TNF_TARGETS_DN                              | 7   | Up   | 0.096457599 | 0.298265073 |
| 1529 | KOHOUTEK_CCNT1_TARGETS                            | 40  | Up   | 0.096468347 | 0.298265073 |
| 1530 | REACTOME_DOPAMINE_NEUROTRANSMITTER_RELEASE_CYCLE  | 10  | Down | 0.096517946 | 0.298265073 |
| 1531 | SMID_BREAST_CANCER_RELAPSE_IN_BONE_DN             | 219 | Up   | 0.096662065 | 0.298515199 |
| 1532 | MULLIGHAN_MLL_SIGNATURE_2_DN                      | 227 | Up   | 0.096876431 | 0.2989818   |
| 1533 | TURASHVILI_BREAST_NORMAL_DUCTAL_VS_LOBULAR_UP     | 62  | Up   | 0.09705897  | 0.299349629 |
| 1534 | LUND_SILENCED_BY_METHYLATION                      | 16  | Up   | 0.097424072 | 0.300279673 |
| 1535 | ZHENG_FOXP3_TARGETS_IN_T_LYMPHOCYTE_UP            | 9   | Up   | 0.097744852 | 0.301071986 |
| 1536 | HOFFMAN_CLOCK_TARGETS_UP                          | 4   | Up   | 0.09795521  | 0.301514674 |
| 1537 | MARTORIATI_MDM4_TARGETS_NEUROEPITHELIUM_UP        | 156 | Up   | 0.098016199 | 0.301514674 |
| 1538 | WILLIAMS_ESR1_TARGETS_DN                          | 5   | Down | 0.098203571 | 0.301894517 |
| 1539 | BANDRES_RESPONSE_TO_CARMUSTIN_MGMT_4_8HR_DN       | 109 | Up   | 0.098364565 | 0.302192829 |
| 1540 | KYNG_DNA_DAMAGE_DN                                | 166 | Up   | 0.098431432 | 0.302201764 |
| 1541 | HANSON_HRAS_SIGNALING_VIA_NFKB                    | 18  | Up   | 0.098611748 | 0.302558771 |
| 1542 | GAUSSMANN_MLL_AF4_FUSION_TARGETS_G_DN             | 34  | Up   | 0.099000804 | 0.303470779 |
| 1543 | TONKS_TARGETS_OF_RUNX1_RUNX1T1_FUSION_MONOCYTE_UP | 179 | Up   | 0.099037448 | 0.303470779 |
| 1544 | CHAUHAN_RESPONSE_TO_METHOXYESTRADIOL_DN           | 94  | Up   | 0.099270873 | 0.303869185 |
| 1545 | GRAHAM_CML_DIVIDING_VS_NORMAL_DIVIDING_DN         | 3   | Up   | 0.099296089 | 0.303869185 |
| 1546 | PENG_Glutamine_DEPRIVATION_UP                     | 33  | Down | 0.099374328 | 0.303911779 |

|      | A                                                                    | B         | C           | D                  | E                  |
|------|----------------------------------------------------------------------|-----------|-------------|--------------------|--------------------|
| 1547 | KEGG_ARACHIDONIC_ACID_METABOLISM                                     | 28        | Up          | 0.09958011         | 0.304203313        |
| 1548 | PID_HIV_NEF_PATHWAY                                                  | 30        | Up          | 0.099694226        | 0.304203313        |
| 1549 | PID_PTP1B_PATHWAY                                                    | 42        | Up          | 0.099746541        | 0.304203313        |
| 1550 | ICHIBA_GRAFT_VERSUS_HOST_DISEASE_D7_DN                               | 24        | Up          | 0.099805437        | 0.304203313        |
| 1551 | CHEOK_RESPONSE_TO_HD_MTX_UP                                          | 13        | Up          | 0.099817116        | 0.304203313        |
| 1552 | REACTOME_TRAF6_MEDIATED_INDUCTION_OF_TAK1_COMPLEX                    | 9         | Down        | 0.099855945        | 0.304203313        |
| 1553 | KASLER_HDAC7_TARGETS_1_DN                                            | 17        | Up          | 0.100063477        | 0.304639129        |
| 1554 | DORN_ADENOVIRUS_INFECTION_24HR_UP                                    | 10        | Up          | 0.101104797        | 0.307611182        |
| 1555 | CHESLER_BRAIN_D6MIT150_QTL_CIS                                       | 3         | Down        | 0.101271519        | 0.307920158        |
| 1556 | REACTOME_E2F_ENABLED_INHIBITION_OF_PRE_REPLICATION_COMPLEX_FORMATION | 10        | Down        | 0.101617458        | 0.308773306        |
| 1557 | SU_KIDNEY                                                            | 6         | Down        | 0.101836399        | 0.309228901        |
| 1558 | ST_WNT_CA2_CYCLIC_GMP_PATHWAY                                        | 11        | Up          | 0.101898285        | 0.309228901        |
| 1559 | <b>KEGG_VIRAL_MYOCARDITIS</b>                                        | <b>46</b> | <b>Up</b>   | <b>0.102461402</b> | <b>0.310556043</b> |
| 1560 | KAAB_FAILED_HEART_ATRIUM_DN                                          | 136       | Up          | 1.03E-01           | 3.11E-01           |
| 1561 | BROWNE_HCMV_INFECTION_2HR_DN                                         | 45        | Down        | 1.03E-01           | 3.11E-01           |
| 1562 | BROWNE_HCMV_INFECTION_1HR_DN                                         | 173       | Down        | 0.102599973        | 0.310560457        |
| 1563 | CHEN_HOXA5_TARGETS_6HR_DN                                            | 6         | Up          | 0.102770933        | 0.310878784        |
| 1564 | BIOCARTA_TALL1_PATHWAY                                               | 11        | Up          | 0.103225782        | 0.312054907        |
| 1565 | YU_BAP1_TARGETS                                                      | 28        | Up          | 0.103407665        | 0.312330867        |
| 1566 | <b>SPIRA_SMOKERS_LUNG_CANCER_DN</b>                                  | <b>19</b> | <b>Down</b> | <b>0.103558616</b> | <b>0.312330867</b> |
| 1567 | REACTOME_TELOMERE_MAINTENANCE                                        | 52        | Down        | 0.10357326         | 0.312330867        |
| 1568 | KEGG_HYPERTROPHIC_CARDIOMYOPATHY_HCM                                 | 57        | Up          | 0.103581475        | 0.312330867        |
| 1569 | REACTOME_NUCLEAR_RECEPTOR_TRANSCRIPTION_PATHWAY                      | 32        | Down        | 0.103922962        | 0.313160713        |
| 1570 | KUROKAWA_LIVER_CANCER_CHEMOTHERAPY_DN                                | 37        | Up          | 0.104096942        | 0.313485055        |
| 1571 | KEGG_SELENOAMINO_ACID_METABOLISM                                     | 24        | Up          | 0.104274712        | 0.313753453        |
| 1572 | BIOCARTA_EGF_PATHWAY                                                 | 30        | Up          | 0.104332094        | 0.313753453        |
| 1573 | MARZEC_IL2_SIGNALING_DN                                              | 30        | Down        | 0.104436818        | 0.313753453        |
| 1574 | OKUMURA_INFLAMMATORY_RESPONSE_LPS                                    | 156       | Up          | 0.104451679        | 0.313753453        |

|      | A                                                    | B   | C    | D           | E           |
|------|------------------------------------------------------|-----|------|-------------|-------------|
| 1575 | HERNANDEZ_ABERRANT_MITOSIS_BY_DOCETACE<br>L_2NM_DN   | 19  | Down | 0.104716401 | 0.314348789 |
| 1576 | DEURIG_T_CELL_PROLYMPHOCYTIC_LEUKEMIA_D<br>N         | 255 | Up   | 0.104793237 | 0.314379712 |
| 1577 | MOOTHA_PYR                                           | 6   | Up   | 0.104921147 | 0.314563718 |
| 1578 | HEIDENBLAD_AMPLICON_8Q24_DN                          | 41  | Up   | 0.105114703 | 0.314944181 |
| 1579 | KEGG_NON_HOMOLOGOUS_END_JOINING                      | 12  | Down | 0.105337807 | 0.31533979  |
| 1580 | KIM_GLIS2_TARGETS_DN                                 | 4   | Down | 0.105410513 | 0.31533979  |
| 1581 | ZHOU_PANCREATIC_BETA_CELL                            | 2   | Down | 0.105446956 | 0.31533979  |
| 1582 | RUTELLA_RESPONSE_TO_HGF_VS_CSF2RB_AND_<br>IL4_DN     | 210 | Up   | 0.105573439 | 0.315489316 |
| 1583 | PID_CIRCADIAN_PATHWAY                                | 15  | Up   | 0.105666711 | 0.315489316 |
| 1584 | WEST_ADRENOCORTICAL_TUMOR_MARKERS_UP                 | 21  | Down | 0.105697267 | 0.315489316 |
| 1585 | NIKOLSKY_MUTATED_AND_AMPLIFIED_IN_BREAS<br>T_CANCER  | 73  | Down | 0.105777335 | 0.315528984 |
| 1586 | GOBERT_OLIGODENDROCYTE_DIFFERENTIATION<br>_UP        | 555 | Down | 0.106496735 | 0.317474495 |
| 1587 | NADELLA_PRKAR1A_TARGETS_DN                           | 8   | Up   | 0.106818837 | 0.318233926 |
| 1588 | YU_MYC_TARGETS_DN                                    | 38  | Up   | 0.106943958 | 0.318405924 |
| 1589 | BIOCARTA_PITX2_PATHWAY                               | 13  | Down | 0.107049578 | 0.318427887 |
| 1590 | PID_HDAC_CLASSII_PATHWAY                             | 31  | Down | 0.107086119 | 0.318427887 |
| 1591 | NIKOLSKY_BREAST_CANCER_6P24_P22_AMPLICO<br>N         | 21  | Up   | 0.107240191 | 0.318685474 |
| 1592 | PID_HDAC_CLASSI_PATHWAY                              | 61  | Down | 0.107450267 | 0.318920521 |
| 1593 | KIM_WT1_TARGETS_12HR_DN                              | 188 | Up   | 0.107454279 | 0.318920521 |
| 1594 | YORDY_RECIPROCAL_REGULATION_BY_ETS1_AN<br>D_SP100_UP | 24  | Up   | 0.107583611 | 0.319041306 |
| 1595 | LIU_BREAST_CANCER                                    | 22  | Up   | 0.107630019 | 0.319041306 |
| 1596 | SENESE_HDAC3_TARGETS_UP                              | 446 | Up   | 0.107931706 | 0.319583206 |
| 1597 | LINDGREN_BLADDER_CANCER_CLUSTER_2A_UP                | 6   | Down | 0.107948105 | 0.319583206 |
| 1598 | MATSUDA_NATURAL_KILLER_DIFFERENTIATION               | 379 | Up   | 0.10860298  | 0.321146839 |

|      | A                                                                           | B         | C           | D                  | E                  |
|------|-----------------------------------------------------------------------------|-----------|-------------|--------------------|--------------------|
| 1599 | REACTOME_TETRAHYDROBIOPTERIN_BH4_SYNTHESIS_RECYCLING_SALVAGE_AND_REGULATION | 12        | Up          | 0.108612201        | 0.321146839        |
| 1600 | <b>BOGNI_TREATMENT_RELATED_MYELOID_LEUKEMIA_UP</b>                          | <b>20</b> | <b>Down</b> | <b>0.109125809</b> | <b>0.322463693</b> |
| 1601 | IIZUKA_LIVER_CANCER_PROGRESSION_G1_G2_DNA                                   | 25        | Up          | 1.09E-01           | 3.23E-01           |
| 1602 | LASTOWSKA_COAMPLIFIED_WITH_MYCN                                             | 36        | Up          | 1.09E-01           | 3.23E-01           |
| 1603 | BIOCARTA_KERATINOCYTE_PATHWAY                                               | 43        | Up          | 0.109494207        | 0.322946397        |
| 1604 | SMID_BREAST_CANCER_RELAPSE_IN_LUNG_UP                                       | 18        | Up          | 0.109668493        | 0.323258658        |
| 1605 | PID_PRL_SIGNALING_EVENTS_PATHWAY                                            | 22        | Up          | 0.109939635        | 0.323855845        |
| 1606 | WATANABE_ULCERATIVE_COLITIS_WITH_CANCER_DN                                  | 7         | Up          | 0.110104171        | 0.323946337        |
| 1607 | <b>WEINMANN_ADAPTATION_TO_HYPOXIA_DN</b>                                    | <b>32</b> | <b>Up</b>   | <b>0.110107475</b> | <b>0.323946337</b> |
| 1608 | TONKS_TARGETS_OF_RUNX1_RUNX1T1_FUSION_ERYTHROCYTE_DN                        | 12        | Down        | 0.110941551        | 0.326197155        |
| 1609 | KAMMINGA_SENESCENCE                                                         | 34        | Down        | 0.111106345        | 0.326380471        |
| 1610 | LANDIS_ERBB2_BREAST_TUMORS_324_DN                                           | 121       | Up          | 0.111142048        | 0.326380471        |
| 1611 | THUM_MIR21_TARGETS_HEART_DISEASE_UP                                         | 12        | Up          | 0.111389698        | 0.326904549        |
| 1612 | MCCOLLUM_GELDANAMYCIN_RESISTANCE_UP                                         | 8         | Down        | 0.111693815        | 0.327593591        |
| 1613 | DING_LUNG_CANCER_MUTATED_SIGNIFICANTLY                                      | 20        | Down        | 0.111765751        | 0.327601224        |
| 1614 | LE_NEURONAL_DIFFERENTIATION_UP                                              | 16        | Up          | 0.111896471        | 0.327781044        |
| 1615 | KANNAN_TP53_TARGETS_DN                                                      | 19        | Up          | 0.112189791        | 0.328294026        |
| 1616 | SMID_BREAST_CANCER_NORMAL_LIKE_DN                                           | 6         | Up          | 0.112210551        | 0.328294026        |
| 1617 | NUYTEN_NIPP1_TARGETS_UP                                                     | 664       | Up          | 0.112288014        | 0.328317367        |
| 1618 | PID_RETINOIC_ACID_PATHWAY                                                   | 28        | Down        | 0.112598949        | 0.329022903        |
| 1619 | REACTOME_INTERFERON_GAMMA_SIGNALING                                         | 38        | Up          | 0.112696935        | 0.329105698        |
| 1620 | HERNANDEZ_ABERRANT_MITOSIS_BY_DOCETAXEL_2NM_UP                              | 62        | Up          | 0.112896456        | 0.329484716        |
| 1621 | ODONNELL_TARGETS_OF_MYC_AND_TFRC_UP                                         | 60        | Up          | 0.113142325        | 0.329822441        |
| 1622 | DELASERNA_MYOD_TARGETS_DN                                                   | 54        | Up          | 0.113151784        | 0.329822441        |

|      | A                                                             | B          | C           | D                  | E                  |
|------|---------------------------------------------------------------|------------|-------------|--------------------|--------------------|
| 1623 | PID_P53_REGULATION_PATHWAY                                    | 57         | Down        | 0.113615394        | 0.330847367        |
| 1624 | FUJIWARA_PARK2_IN_LIVER_CANCER_DN                             | 3          | Up          | 0.113643445        | 0.330847367        |
| 1625 | KEGG_APOPTOSIS                                                | 72         | Up          | 0.113947144        | 0.33152725         |
| 1626 | IYENGAR_RESPONSE_TO_ADIPOCYTE_FACTORS                         | 9          | Down        | 0.114017703        | 0.331528399        |
| 1627 | SIMBULAN_PARP1_TARGETS_DN                                     | 16         | Down        | 0.114153394        | 0.331718812        |
| 1628 | COLLER_MYC_TARGETS_DN                                         | 7          | Up          | 0.114468998        | 0.332431479        |
| 1629 | RODWELL_AGING_KIDNEY_UP                                       | 362        | Up          | 0.114548964        | 0.33245937         |
| 1630 | WILSON_PROTEASES_AT_TUMOR_BONE_INTERF<br>ACE_UP               | 17         | Up          | 0.114658891        | 0.332574132        |
| 1631 | SCHURINGA_STAT5A_TARGETS_UP                                   | 16         | Up          | 0.114881046        | 0.333014076        |
| 1632 | CROMER_TUMORIGENESIS_DN                                       | 26         | Up          | 0.114986528        | 0.333115477        |
| 1633 | RODWELL_AGING_KIDNEY_NO_BLOOD_UP                              | 172        | Up          | 0.115147269        | 0.333376745        |
| 1634 | MULLIGHAN_MLL_SIGNATURE_2_UP                                  | 352        | Up          | 0.11577337         | 0.334850216        |
| 1635 | MURATA_VIRULENCE_OF_H_PILORI                                  | 16         | Down        | 0.115797937        | 0.334850216        |
| 1636 | ZHANG_INTERFERON_RESPONSE                                     | 15         | Up          | 0.116157429        | 0.335684313        |
| 1637 | ELLWOOD_MYC_TARGETS_UP                                        | 11         | Up          | 0.116423234        | 0.336181017        |
| 1638 | BREDEMEYER_RAG_SIGNALING_NOT_VIA_ATM_<br>UP                   | 49         | Up          | 0.116688035        | 0.336181017        |
| 1639 | JAEGER_METASTASIS_UP                                          | 38         | Down        | 0.116742317        | 0.336181017        |
| 1640 | BIOCARTA_IL6_PATHWAY                                          | 21         | Up          | 0.116809368        | 0.336181017        |
| 1641 | <b>MIKKELSEN_IPS_LCP_WITH_H3K27ME3</b>                        | <b>2</b>   | <b>Down</b> | <b>0.116813367</b> | <b>0.336181017</b> |
| 1642 | ZHAN_V2_LATE_DIFFERENTIATION_GENES                            | 40         | Up          | 1.17E-01           | 3.36E-01           |
| 1643 | HOLLEMAN_VINCRIStINE_RESISTANCE_ALL_DN                        | 19         | Down        | 1.17E-01           | 3.36E-01           |
| 1644 | LIM_MAMMARY_LUMINAL_MATURE_DN                                 | 89         | Up          | 0.1168985          | 0.336181017        |
| 1645 | REACTOME_METABOLISM_OF_NON_CODING_RN<br>A                     | 48         | Down        | 0.117531088        | 0.337794643        |
| 1646 | MASRI_RESISTANCE_TO_TAMOXIFEN_AND_ARO<br>MATASE_INHIBITORS_UP | 12         | Down        | 0.11763235         | 0.337880153        |
| 1647 | HILLION_HMGA1B_TARGETS                                        | 78         | Up          | 0.117764721        | 0.338054865        |
| 1648 | <b>CHEN_HOXA5_TARGETS_9HR_UP</b>                              | <b>208</b> | <b>Up</b>   | <b>0.118079614</b> | <b>0.338712143</b> |
| 1649 | BIOCARTA_NFKB_PATHWAY                                         | 20         | Up          | 0.118137061        | 0.338712143        |

|      | A                                                                  | B   | C    | D           | E           |
|------|--------------------------------------------------------------------|-----|------|-------------|-------------|
| 1650 | FIGUEROA_AML_METHYLATION_CLUSTER_7_UP                              | 99  | Up   | 0.118622583 | 0.339701932 |
| 1651 | REACTOME_RNA_POL_III_TRANSCRIPTION_INITIATION_FROM_TYPE_2_PROMOTER | 22  | Down | 0.118626071 | 0.339701932 |
| 1652 | TARTE_PLASMA_CELL_VS_B_LYMPHOCYTE_DN                               | 29  | Up   | 0.11878677  | 0.339956081 |
| 1653 | HOFMANN_MYELODYSPLASTIC_SYNDROM_RISK_DN                            | 14  | Down | 0.119225493 | 0.341005116 |
| 1654 | NIELSEN_SCHWANNOMA_DN                                              | 16  | Down | 0.119415339 | 0.341341485 |
| 1655 | KAYO_CALORIE_RESTRICTION_MUSCLE_UP                                 | 72  | Up   | 0.119528641 | 0.341458783 |
| 1656 | SIMBULAN_UV_RESPONSE_NORMAL_DN                                     | 32  | Up   | 0.119645984 | 0.341587478 |
| 1657 | TESAR_JAK_TARGETS_MOUSE_ES_D3_UP                                   | 2   | Up   | 0.119774788 | 0.341748717 |
| 1658 | KEGG_WNT_SIGNALING_PATHWAY                                         | 125 | Down | 0.119945019 | 0.342027892 |
| 1659 | YAGI_AML_RELAPSE_PROGNOSIS                                         | 31  | Up   | 0.120050215 | 0.34212139  |
| 1660 | WIEMANN_TELOMERE_SHORTENING_AND_CHROMINIC_LIVER_DAMAGE_UP          | 7   | Down | 0.120136298 | 0.342160344 |
| 1661 | RANKIN_ANGIOGENIC_TARGETS_OF_VHL_HIF2A_UP                          | 4   | Up   | 0.120296298 | 0.342225668 |
| 1662 | BOYAULT_LIVER_CANCER_SUBCLASS_G3_UP                                | 187 | Down | 0.120304092 | 0.342225668 |
| 1663 | LA_MEN1_TARGETS                                                    | 22  | Up   | 0.120420261 | 0.34235002  |
| 1664 | KREPEL_CD99_TARGETS_DN                                             | 7   | Up   | 0.12085605  | 0.343382342 |
| 1665 | BURTON_ADIPOGENESIS_4                                              | 45  | Down | 0.121313512 | 0.344474967 |
| 1666 | SENGUPTA_NASOPHARYNGEAL_CARCINOMA_WITH_LMP1_DN                     | 82  | Up   | 0.121460304 | 0.344684645 |
| 1667 | ZAMORA_NOS2_TARGETS_UP                                             | 63  | Up   | 0.121746174 | 0.345288519 |
| 1668 | WEI_MIR34A_TARGETS                                                 | 142 | Up   | 0.121870609 | 0.345434091 |
| 1669 | MIKKELSEN_PARTIALLY_REPROGRAMMED_TO_PLURIPOTENCY                   | 7   | Up   | 0.122069178 | 0.345789488 |
| 1670 | FORTSCHEGGER_PHF8_TARGETS_DN                                       | 708 | Up   | 0.122203365 | 0.345962192 |
| 1671 | KEGG_VASCULAR_SMOOTH_MUSCLE_CONTRACTION                            | 85  | Up   | 0.122541097 | 0.346710589 |
| 1672 | LEI_HOXC8_TARGETS_UP                                               | 8   | Down | 0.122628164 | 0.346749296 |
| 1673 | BILANGES_RAPAMYCIN_SENSITIVE_GENES                                 | 37  | Up   | 0.122837658 | 0.347133933 |

|      | A                                                                              | B   | C    | D           | E           |
|------|--------------------------------------------------------------------------------|-----|------|-------------|-------------|
| 1674 | PILON_KLF1_TARGETS_UP                                                          | 406 | Up   | 0.122978394 | 0.347323917 |
| 1675 | REACTOME_FACTORS_INVOLVED_IN_MEGAKARYOCYTE_DEVELOPMENT_AND_PLATELET_PRODUCTION | 91  | Down | 0.123108934 | 0.347377735 |
| 1676 | MOTAMED_RESPONSE_TO_ANDROGEN_UP                                                | 3   | Up   | 0.123144488 | 0.347377735 |
| 1677 | XU_GH1_AUTOCRINE_TARGETS_UP                                                    | 196 | Up   | 0.123249479 | 0.347466461 |
| 1678 | GRAESSMANN_RESPONSE_TO_MC_AND_SERUM_DEPRIVATION_DN                             | 71  | Up   | 0.123491937 | 0.347933532 |
| 1679 | PID_TCR_CALCIIUM_PATHWAY                                                       | 20  | Up   | 0.123562427 | 0.347933532 |
| 1680 | REACTOME_SIGNAL_ATTENUATION                                                    | 12  | Up   | 0.123835887 | 0.348428988 |
| 1681 | KEGG_ANTIGEN_PROCESSING_AND_PRESENTATION                                       | 45  | Up   | 0.123885862 | 0.348428988 |
| 1682 | REACTOME_N_GLYCAN_TRIMMING_IN_THE_ER_AND_CALNEXIN_CALRETICULIN_CYCLE           | 13  | Up   | 0.124027322 | 0.348542141 |
| 1683 | KARLSSON_TGFB1_TARGETS_UP                                                      | 123 | Up   | 1.24E-01    | 3.49E-01    |
| 1684 | EHRlich_ICF_SYNDROM_UP                                                         | 9   | Up   | 1.24E-01    | 3.49E-01    |
| 1685 | PID_EPO_PATHWAY                                                                | 32  | Up   | 0.124384324 | 0.348939376 |
| 1686 | REACTOME_FRS2_MEDIATED_CASCADE                                                 | 24  | Down | 0.124449761 | 0.348939376 |
| 1687 | KANG_GIST_WITH_PDGFR_A_UP                                                      | 40  | Up   | 0.124550791 | 0.348939376 |
| 1688 | KOINUMA_COLON_CANCER_MSI_UP                                                    | 13  | Down | 0.124713932 | 0.348939376 |
| 1689 | WEST_ADRENOCORTICAL_CARCINOMA_VS_ADENOMA_DN                                    | 17  | Up   | 0.124806257 | 0.348939376 |
| 1690 | FOSTER_TOLERANT_MACROPHAGE_DN                                                  | 367 | Up   | 0.124870473 | 0.348939376 |
| 1691 | WELCSH_BRCA1_TARGETS_UP                                                        | 189 | Up   | 0.124995206 | 0.348939376 |
| 1692 | LABBE_WNT3A_TARGETS_UP                                                         | 93  | Up   | 0.125009918 | 0.348939376 |
| 1693 | KEGG_FOLATE_BIOSYNTHESIS                                                       | 9   | Up   | 0.125111853 | 0.348939376 |
| 1694 | BIOCARTA_P38MAPK_PATHWAY                                                       | 35  | Up   | 0.125138441 | 0.348939376 |
| 1695 | WANG_RESPONSE_TO_PACLITAXEL_VIA_MAPK8_DN                                       | 4   | Up   | 0.125161177 | 0.348939376 |
| 1696 | ZEMBUTSU_SENSITIVITY_TO_VINCRIStINE                                            | 13  | Up   | 0.125203958 | 0.348939376 |
| 1697 | REACTOME_PEROXISOMAL_LIPID_METABOLISM                                          | 20  | Up   | 0.125248927 | 0.348939376 |

|      | A                                                         | B   | C    | D           | E           |
|------|-----------------------------------------------------------|-----|------|-------------|-------------|
| 1698 | RODRIGUES_THYROID_CARCINOMA_ANAPLASTIC_UP                 | 671 | Up   | 0.125442157 | 0.349271768 |
| 1699 | PANGAS_TUMOR_SUPPRESSION_BY_SMAD1_AND_SMAD5_DN            | 146 | Up   | 0.125761492 | 0.349954682 |
| 1700 | FALVELLA_SMOKERS_WITH_LUNG_CANCER                         | 63  | Up   | 0.126071254 | 0.350610167 |
| 1701 | REACTOME_ACETYLCHOLINE_NEUROTRANSMITTER_RELEASE_CYCLE     | 6   | Down | 0.12623593  | 0.350861628 |
| 1702 | HOSHIDA_LIVER_CANCER_LATE_RECURRENCE_DN                   | 55  | Up   | 0.126377851 | 0.351049586 |
| 1703 | VANDESLUIS_COMMD1_TARGETS_GROUP_3_UP                      | 68  | Up   | 0.126589737 | 0.351431557 |
| 1704 | FEVR_CTNNB1_TARGETS_DN                                    | 513 | Down | 0.12703962  | 0.352473403 |
| 1705 | ABBUD_LIF_SIGNALING_2_UP                                  | 11  | Up   | 0.127329126 | 0.352894151 |
| 1706 | KEGG_GLYCOSAMINOGLYCAN_BIOSYNTHESIS_CHONDROITIN_SULFATE   | 21  | Down | 0.127340641 | 0.352894151 |
| 1707 | LOPEZ_MESOTHELIOMA_SURVIVAL_OVERALL_UP                    | 5   | Up   | 0.127462531 | 0.353024888 |
| 1708 | MATZUK_SPERMATOCYTE                                       | 58  | Down | 0.127619236 | 0.35325184  |
| 1709 | AZARE_STAT3_TARGETS                                       | 19  | Up   | 0.127696611 | 0.353259066 |
| 1710 | FONTAINE_PAPILLARY_THYROID_CARCINOMA_DN                   | 50  | Up   | 0.127903367 | 0.353623996 |
| 1711 | ROSS_AML_WITH_PML_RARA_FUSION                             | 63  | Up   | 0.127986887 | 0.353647976 |
| 1712 | REACTOME_BMAL1_CLOCK_NPAS2_ACTIVATES_CIRCADIAN_EXPRESSION | 34  | Up   | 0.128131324 | 0.353840155 |
| 1713 | SHIRAISHI_PLZF_TARGETS_UP                                 | 9   | Up   | 0.128439273 | 0.35448339  |
| 1714 | LANDIS_ERBB2_BREAST_TUMORS_65_DN                          | 31  | Up   | 0.128591208 | 0.354695539 |
| 1715 | WARTERS_IR_RESPONSE_5GY                                   | 35  | Down | 0.128939875 | 0.35513838  |
| 1716 | KEGG_REGULATION_OF_ACTIN_CYTOSKELETON                     | 166 | Up   | 0.128960326 | 0.35513838  |
| 1717 | BIOCARTA_TNFR2_PATHWAY                                    | 17  | Up   | 0.12897724  | 0.35513838  |
| 1718 | KEGG_ASCORBATE_AND_ALDARATE_METABOLISM                    | 6   | Up   | 0.129053915 | 0.355142544 |



|      | A                                                                      | B         | C         | D                  | E                |
|------|------------------------------------------------------------------------|-----------|-----------|--------------------|------------------|
| 1719 | LOPEZ_MESOTHELIOMA_SURVIVAL_WORST_VS_BEST_DN                           | 3         | Up        | 0.129810938        | 0.357017858      |
| 1720 | LANG_MYB_FAMILY_TARGETS                                                | 28        | Up        | 0.129916049        | 0.357099087      |
| 1721 | BYSTRYKH_HEMATOPOIESIS_STEM_CELL_QTL_CIS                               | 105       | Up        | 0.130450538        | 0.358359763      |
| 1722 | TAKEDA_TARGETS_OF_NUP98_HOXA9_FUSION_8D_UP                             | 97        | Up        | 0.130536051        | 0.358386311      |
| 1723 | <b>PID_S1P_S1P1_PATHWAY</b>                                            | <b>19</b> | <b>Up</b> | <b>0.130712045</b> | <b>0.3586611</b> |
| 1724 | BIERIE_INFLAMMATORY_RESPONSE_TGFB1                                     | 2         | Up        | 1.31E-01           | 3.59E-01         |
| 1725 | WANG_CISPLATIN_RESPONSE_AND_XPC_DN                                     | 202       | Up        | 1.31E-01           | 3.59E-01         |
| 1726 | SANA_TNF_SIGNALING_DN                                                  | 75        | Up        | 0.131302581        | 0.359654897      |
| 1727 | WOOD_EBV_EBNA1_TARGETS_DN                                              | 38        | Up        | 0.131721317        | 0.36059283       |
| 1728 | OSMAN_BLADDER_CANCER_DN                                                | 372       | Down      | 0.132123182        | 0.361483518      |
| 1729 | KYNG_WERNER_SYNDROM_DN                                                 | 25        | Up        | 0.132378468        | 0.361972373      |
| 1730 | REACTOME_TRANSCRIPTIONAL_REGULATION_OF_WHITE_ADIPOCYTE_DIFFERENTIATION | 60        | Down      | 0.132607375        | 0.362388576      |
| 1731 | REACTOME_NOTCH_HLH_TRANSCRIPTION_PATHWAY                               | 11        | Down      | 0.132686348        | 0.362394794      |
| 1732 | NAKAYAMA_SOFT_TISSUE_TUMORS_PCA1_UP                                    | 30        | Up        | 0.132809175        | 0.362520711      |
| 1733 | TERAO_AOX4_TARGETS_HG_UP                                               | 27        | Up        | 0.13300284         | 0.362668264      |
| 1734 | VILIMAS_NOTCH1_TARGETS_UP                                              | 26        | Up        | 0.133016741        | 0.362668264      |
| 1735 | HOLLEMAN_DAUNORUBICIN_B_ALL_DN                                         | 12        | Down      | 0.133547022        | 0.363753563      |
| 1736 | AKL_HTLV1_INFECTION_UP                                                 | 26        | Up        | 0.133568769        | 0.363753563      |
| 1737 | BILANGES_SERUM_SENSITIVE_VIA_TSC1                                      | 18        | Up        | 0.134022347        | 0.364622118      |
| 1738 | DAZARD_UV_RESPONSE_CLUSTER_G5                                          | 9         | Down      | 0.134113701        | 0.364622118      |
| 1739 | KEGG_LYSINE_DEGRADATION                                                | 43        | Up        | 0.134119204        | 0.364622118      |
| 1740 | FOSTER_KDM1A_TARGETS_DN                                                | 194       | Down      | 0.134323199        | 0.364917471      |
| 1741 | BIOCARTA_IL17_PATHWAY                                                  | 3         | Down      | 0.134382307        | 0.364917471      |
| 1742 | BHAT_ESR1_TARGETS_NOT_VIA_AKT1_UP                                      | 183       | Up        | 0.13453257         | 0.365115678      |
| 1743 | BIOCARTA_CD40_PATHWAY                                                  | 14        | Up        | 0.134906688        | 0.365787137      |
| 1744 | WANG_THOC1_TARGETS_DN                                                  | 11        | Up        | 0.134959302        | 0.365787137      |
| 1745 | ZIRN_TRETINOIN_RESPONSE_UP                                             | 18        | Up        | 0.135012226        | 0.365787137      |

|      | A                                                   | B         | C         | D                  | E                  |
|------|-----------------------------------------------------|-----------|-----------|--------------------|--------------------|
| 1746 | LINDSTEDT_DENDRITIC_CELL_MATURATION_D               | 50        | Up        | 0.135282046        | 0.366308119        |
| 1747 | BIOCARTA_UCALPAIN_PATHWAY                           | 16        | Up        | 0.13549012         | 0.36656839         |
| 1748 | REACTOME_BOTULINUM_NEUROTOXICITY                    | 16        | Down      | 0.135533329        | 0.36656839         |
| 1749 | YOSHIOKA_LIVER_CANCER_EARLY_RECURRENCE_UP           | 32        | Down      | 0.135973004        | 0.367539953        |
| 1750 | PID_VEGFR1_PATHWAY                                  | 26        | Up        | 0.136048122        | 0.367539953        |
| 1751 | BIOCARTA_AKT_PATHWAY                                | 18        | Down      | 0.136607447        | 0.368725979        |
| 1752 | SANDERSON_PPARA_TARGETS                             | 11        | Up        | 0.136643215        | 0.368725979        |
| 1753 | WANG_RESPONSE_TO_PACLITAXEL_VIA_MAPK8_UP            | 12        | Up        | 0.136903267        | 0.369129257        |
| 1754 | KAUFFMANN_DNA_REPLICATION_GENES                     | 129       | Down      | 0.13707795         | 0.369129257        |
| 1755 | ACEVEDO_LIVER_TUMOR_VS_NORMAL_ADJACENT_TISSUE_DN    | 209       | Up        | 0.137085527        | 0.369129257        |
| 1756 | MYLLYKANGAS_AMPLIFICATION_HOT_SPOT_18               | 5         | Up        | 0.137105153        | 0.369129257        |
| 1757 | RAO_BOUND_BY_SALL4                                  | 194       | Up        | 0.137321483        | 0.369402289        |
| 1758 | STEGER_ADIPOGENESIS_DN                              | 19        | Up        | 0.13738888         | 0.369402289        |
| 1759 | SA_REG_CASCADE_OF_CYCLIN_EXPR                       | 11        | Up        | 0.137584289        | 0.369402289        |
| 1760 | PID_EPHRINB_REV_PATHWAY                             | 24        | Down      | 0.137586016        | 0.369402289        |
| 1761 | BAUS_TFF2_TARGETS_UP                                | 16        | Down      | 0.137597466        | 0.369402289        |
| 1762 | WOTTON_RUNX_TARGETS_DN                              | 23        | Up        | 0.137943774        | 0.37012171         |
| 1763 | RICKMAN_HEAD_AND_NECK_CANCER_A                      | 77        | Up        | 0.138170943        | 0.370252462        |
| 1764 | <b>SMID_BREAST_CANCER_RELAPSE_IN_BONE_UP</b>        | <b>60</b> | <b>Up</b> | <b>0.138173193</b> | <b>0.370252462</b> |
| 1765 | BOQUEST_STEM_CELL_UP                                | 189       | Up        | 1.38E-01           | 3.70E-01           |
| 1766 | KIM_WT1_TARGETS_DN                                  | 435       | Down      | 1.38E-01           | 3.70E-01           |
| 1767 | ST_G_ALPHA_I_PATHWAY                                | 27        | Up        | 0.138466952        | 0.370473583        |
| 1768 | BRUECKNER_TARGETS_OF_MIRLET7A3_UP                   | 92        | Up        | 0.138656634        | 0.370771135        |
| 1769 | MARTINEZ_TP53_TARGETS_UP                            | 472       | Up        | 0.13891719         | 0.371195128        |
| 1770 | DACOSTA_UV_RESPONSE_VIA_ERCC3_XPCS_UP               | 25        | Down      | 0.138972313        | 0.371195128        |
| 1771 | WANG_BARRETTS_ESOPHAGUS_AND_ESOPHAGUS_CANCER_UP     | 17        | Up        | 0.139171338        | 0.371516708        |
| 1772 | REACTOME_SIGNALING_BY_CONSTITUTIVELY_ACTIVATED_EGFR | 17        | Down      | 0.13962032         | 0.372504807        |

|      | A                                               | B   | C    | D           | E           |
|------|-------------------------------------------------|-----|------|-------------|-------------|
| 1773 | BOYLAN_MULTIPLE_MYELOMA_D_CLUSTER_DN            | 36  | Up   | 0.139935702 | 0.373135548 |
| 1774 | BIOCARTA_RHO_PATHWAY                            | 31  | Up   | 0.14006131  | 0.373259837 |
| 1775 | SENESE_HDAC2_TARGETS_UP                         | 96  | Up   | 0.140266892 | 0.373596993 |
| 1776 | MAHADEVAN_GIST_MORPHOLOGICAL_SWITCH             | 14  | Up   | 0.140383951 | 0.373698124 |
| 1777 | KEGG_VALINE_LEUCINE_AND_ISOLEUCINE_BIOSYNTHESIS | 10  | Up   | 0.140546331 | 0.373840046 |
| 1778 | REACTOME_RORA_ACTIVATES_CIRCADIAN_EXPRESSION    | 24  | Down | 0.140595505 | 0.373840046 |
| 1779 | DUTERTRE ESTRADIOL_RESPONSE_24HR_UP             | 308 | Down | 0.140843381 | 0.374288513 |
| 1780 | REACTOME_SIGNALING_BY_NOTCH1                    | 64  | Down | 0.140958701 | 0.374384409 |
| 1781 | SILIGAN_TARGETS_OF_EWS_FLI1_FUSION_UP           | 14  | Up   | 0.14139874  | 0.375342161 |
| 1782 | MURAKAMI_UV_RESPONSE_6HR_UP                     | 31  | Up   | 0.141756281 | 0.376079971 |
| 1783 | DER_IFN_ALPHA_RESPONSE_UP                       | 65  | Up   | 0.141979518 | 0.376460842 |
| 1784 | SCHLOSSER_SERUM_RESPONSE_DN                     | 638 | Up   | 0.14248648  | 0.377593168 |
| 1785 | FARMER_BREAST_CANCER_CLUSTER_5                  | 18  | Down | 0.142884942 | 0.378436855 |
| 1786 | KANG_GIST_WITH_PDGFR_A_DN                       | 4   | Up   | 0.143123767 | 0.378795728 |
| 1787 | BIOCARTA_MITOCHONDRIA_PATHWAY                   | 19  | Up   | 0.143180777 | 0.378795728 |
| 1788 | ST_G_ALPHA_S_PATHWAY                            | 13  | Up   | 0.144105896 | 0.381029859 |
| 1789 | BROWNE_HCMV_INFECTION_48HR_DN                   | 399 | Up   | 0.144383713 | 0.381550919 |
| 1790 | REACTOME_MRNA_DECAY_BY_3_TO_5_EXORIBONUCLEASE   | 11  | Down | 0.144464857 | 0.381551955 |
| 1791 | REACTOME_SIGNALING_BY_INSULIN_RECEPTOR          | 86  | Up   | 0.144552476 | 0.381570083 |
| 1792 | CHIARETTI_T_ALL_RELAPSE_PROGNOSIS               | 16  | Down | 0.1448704   | 0.382175888 |
| 1793 | FONTAINE_PAPILLARY_THYROID_CARCINOMA_UP         | 52  | Up   | 0.144943744 | 0.382175888 |
| 1794 | CONRAD_STEM_CELL                                | 37  | Down | 0.145211264 | 0.382667721 |
| 1795 | GRAHAM_NORMAL QUIESCENT_VS_NORMAL_DIVIDING_UP   | 42  | Up   | 0.145386163 | 0.382913435 |
| 1796 | REACTOME_SYNTHESIS_OF_BILE_ACIDS_AND_BILE_SALTS | 11  | Up   | 0.145466585 | 0.382913435 |
| 1797 | DURAND_STROMA_S_UP                              | 248 | Up   | 0.145562103 | 0.382951523 |

|      | A                                                      | B          | C           | D                  | E                  |
|------|--------------------------------------------------------|------------|-------------|--------------------|--------------------|
| 1798 | ZUCCHI_METASTASIS_DN                                   | 35         | Down        | 0.145828309        | 0.383438375        |
| 1799 | MATZUK_EMBRYONIC_GERM_CELL                             | 15         | Down        | 0.146169428        | 0.38387237         |
| 1800 | REACTOME_NOREPINEPHRINE_NEUROTRANSMITTER_RELEASE_CYCLE | 8          | Down        | 0.146218749        | 0.38387237         |
| 1801 | KEGG_DILATED_CARDIOMYOPATHY                            | 62         | Up          | 0.146375581        | 0.38387237         |
| 1802 | MITSIADES_RESPONSE_TO_APLIDIN_UP                       | 390        | Up          | 0.146460071        | 0.38387237         |
| 1803 | RAMALHO_STEMNESS_UP                                    | 204        | Up          | 0.14646059         | 0.38387237         |
| 1804 | LI_CYTIDINE_ANALOG_PATHWAY                             | 12         | Up          | 0.146480822        | 0.38387237         |
| 1805 | <b>HEIDENBLAD_AMPLICON_8Q24_UP</b>                     | <b>35</b>  | <b>Down</b> | <b>0.146924241</b> | <b>0.384820974</b> |
| 1806 | WATANABE_RECTAL_CANCER_RADIO_THERAPY_RESPONSE_UP       | 100        | Up          | 1.47E-01           | 3.85E-01           |
| 1807 | SU_PLACENTA                                            | 15         | Up          | 1.47E-01           | 3.85E-01           |
| 1808 | WANG_RECURRENT_LIVER_CANCER_DN                         | 15         | Up          | 0.147244815        | 0.385020337        |
| 1809 | CREIGHTON_ENDOCRINE_THERAPY_RESISTANCE_1               | 472        | Up          | 0.147603623        | 0.385619238        |
| 1810 | HUMMEL_BURKITT'S_LYMPHOMA_DN                           | 13         | Up          | 0.14763708         | 0.385619238        |
| 1811 | GRAHAM_CML_QUIESCENT_VS_NORMAL_DIVIDING_DN             | 6          | Up          | 0.147823652        | 0.385893236        |
| 1812 | <b>COLDREN_GEFITINIB_RESISTANCE_DN</b>                 | <b>193</b> | <b>Up</b>   | <b>0.147938315</b> | <b>0.385979314</b> |
| 1813 | GRATIAS_RETINOBLASTOMA_16Q24                           | 17         | Up          | 0.148316466        | 0.386567993        |
| 1814 | NOUZOVA_METHYLATED_IN_APL                              | 48         | Up          | 0.148327571        | 0.386567993        |
| 1815 | REACTOME_SIGNALING_BY_RHO_GTPASES                      | 100        | Down        | 0.14881203         | 0.387353315        |
| 1816 | FIGUEROA_AML_METHYLATION_CLUSTER_6_UP                  | 116        | Up          | 0.148880306        | 0.387353315        |
| 1817 | MIYAGAWA_TARGETS_OF_EWSR1_ETS_FUSIONS_UP               | 219        | Up          | 0.148880514        | 0.387353315        |
| 1818 | TAKEDA_TARGETS_OF_NUP98_HOXA9_FUSION_3D_UP             | 121        | Up          | 0.14895682         | 0.387353315        |
| 1819 | BENPORATH_PRC2_TARGETS                                 | 286        | Down        | 0.149080969        | 0.387364962        |
| 1820 | MALIK_REPRESSED_BY_ESTROGEN                            | 11         | Down        | 0.149125263        | 0.387364962        |
| 1821 | BIOCARTA_TOLL_PATHWAY                                  | 29         | Up          | 0.149364614        | 0.387773518        |
| 1822 | KEGG_GLIOMA                                            | 55         | Up          | 0.149525249        | 0.387935918        |

|      | A                                                        | B   | C    | D           | E           |
|------|----------------------------------------------------------|-----|------|-------------|-------------|
| 1823 | PID_SYNDECAN_3_PATHWAY                                   | 14  | Up   | 0.149591374 | 0.387935918 |
| 1824 | BIOCARTA_INTRINSIC_PATHWAY                               | 12  | Up   | 0.15005991  | 0.388726457 |
| 1825 | KASLER_HDAC7_TARGETS_2_UP                                | 2   | Down | 0.150124431 | 0.388726457 |
| 1826 | MCBRYAN_PUBERTAL_BREAST_4_5WK_DN                         | 172 | Up   | 0.150143023 | 0.388726457 |
| 1827 | MIKKELSEN_MCV6_HCP_WITH_H3K27ME3                         | 252 | Down | 0.150336036 | 0.389013018 |
| 1828 | HOFFMANN_LARGE_TO_SMALL_PRE_BII_LYMPH<br>OCYTE_DN        | 59  | Up   | 0.15060018  | 0.38927075  |
| 1829 | GYORFFY_MITOXANTRONE_RESISTANCE                          | 42  | Up   | 0.150680489 | 0.38927075  |
| 1830 | KIM_ALL_DISORDERS_CALB1_CORR_UP                          | 522 | Up   | 0.150682794 | 0.38927075  |
| 1831 | LASTOWSKA_NEUROBLASTOMA_COPY_NUMBER<br>_UP               | 166 | Down | 0.150918039 | 0.38966543  |
| 1832 | RODRIGUES_THYROID_CARCIOMA_POORLY_DIF<br>FERENTIATED_UP  | 622 | Up   | 0.151039077 | 0.389684958 |
| 1833 | GARGALOVIC_RESPONSE_TO_OXIDIZED_PHOSPH<br>OLIPIDS_RED_DN | 22  | Down | 0.151090549 | 0.389684958 |
| 1834 | JU_AGING_TERC_TARGETS_DN                                 | 2   | Down | 0.151511327 | 0.390486835 |
| 1835 | REACTOME_TRANSPORT_OF_ORGANIC_ANIONS                     | 5   | Up   | 0.151566742 | 0.390486835 |
| 1836 | ZHANG_PROLIFERATING_VS_QUIESCENT                         | 47  | Up   | 0.151737749 | 0.390714367 |
| 1837 | GRADE_COLON_VS_RECTAL_CANCER_UP                          | 32  | Up   | 0.152101994 | 0.39127174  |
| 1838 | POMEROY_MEDULLOBLASTOMA_DESMOPLASIC_<br>VS_CLASSIC_UP    | 49  | Down | 0.152161975 | 0.39127174  |
| 1839 | KEGG_AMINO_SUGAR_AND_NUCLEOTIDE_SUGA<br>R_METABOLISM     | 41  | Up   | 0.152202636 | 0.39127174  |
| 1840 | KIM_TIAL1_TARGETS                                        | 29  | Up   | 0.152863987 | 0.392758204 |
| 1841 | YAO_HOXA10_TARGETS_VIA_PROGESTERONE_D<br>N               | 11  | Up   | 0.15299518  | 0.392881645 |
| 1842 | TOOKER_GEMCITABINE_RESISTANCE_UP                         | 74  | Up   | 0.153091885 | 0.392916434 |
| 1843 | ZERBINI_RESPONSE_TO_SULINDAC_DN                          | 6   | Down | 0.153207371 | 0.392999364 |
| 1844 | KEGG_HUNTINGTONS_DISEASE                                 | 162 | Down | 0.1534076   | 0.393299463 |
| 1845 | YEMELYANOV_GR_TARGETS_DN                                 | 8   | Up   | 0.153855305 | 0.39423336  |
| 1846 | REACTOME_MRNA_3_END_PROCESSING                           | 34  | Down | 0.154218347 | 0.394949426 |

|      | A                                                                         | B   | C    | D           | E           |
|------|---------------------------------------------------------------------------|-----|------|-------------|-------------|
| 1847 | ELVIDGE_HIF1A_AND_HIF2A_TARGETS_UP                                        | 41  | Up   | 1.54E-01    | 3.95E-01    |
| 1848 | BIOCARTA_PDGF_PATHWAY                                                     | 30  | Up   | 1.55E-01    | 3.96E-01    |
| 1849 | SPIELMAN_LYMPHOBLAST_EUROPEAN_VS_ASIAN_DN                                 | 555 | Up   | 0.155467863 | 0.397358038 |
| 1850 | SCHLINGEMANN_SKIN_CARCINOGENESIS_TPA_UP                                   | 29  | Down | 0.155495241 | 0.397358038 |
| 1851 | MCBRYAN_PUBERTAL_BREAST_3_4WK_DN                                          | 33  | Up   | 0.155586122 | 0.397375367 |
| 1852 | GHANDHI_DIRECT_IRRADIATION_UP                                             | 74  | Up   | 0.156091944 | 0.398395133 |
| 1853 | BIOCARTA_G1_PATHWAY                                                       | 25  | Up   | 0.156154029 | 0.398395133 |
| 1854 | INGRAM_SHH_TARGETS                                                        | 6   | Up   | 0.156350462 | 0.398681021 |
| 1855 | TIAN_TNF_SIGNALING_VIA_NFKB                                               | 20  | Up   | 0.15661895  | 0.399111506 |
| 1856 | CROONQUIST_NRAS_VS_STROMAL_STIMULATION_UP                                 | 28  | Up   | 0.156688221 | 0.399111506 |
| 1857 | REACTOME_DEPOSITION_OF_NEW_CENPA_CONTAINING_NUCLEOSOMES_AT_THE_CENTROMERE | 40  | Down | 0.157177338 | 0.40014166  |
| 1858 | LOPEZ_MBD_TARGETS_IMPRINTED_AND_X_LINKED                                  | 14  | Down | 0.157357306 | 0.400384098 |
| 1859 | PEDERSEN_METASTASIS_BY_ERBB2_ISOFORM_7                                    | 349 | Up   | 0.157580979 | 0.40073742  |
| 1860 | RORIE_TARGETS_OF_EWSR1_FLI1_FUSION_DN                                     | 20  | Up   | 0.157721049 | 0.40080409  |
| 1861 | RAY_TUMORIGENESIS_BY_ERBB2_CDC25A_UP                                      | 77  | Up   | 0.157855785 | 0.40080409  |
| 1862 | SPIRA_SMOKERS_LUNG_CANCER_UP                                              | 30  | Up   | 0.157887132 | 0.40080409  |
| 1863 | DUNNE_TARGETS_OF_AML1_MTG8_FUSION_DN                                      | 16  | Up   | 0.157946501 | 0.40080409  |
| 1864 | GRABARCZYK_BCL11B_TARGETS_UP                                              | 67  | Up   | 0.158040894 | 0.400828354 |
| 1865 | ZEMBUTSU_SENSITIVITY_TO_NIMUSTINE                                         | 13  | Down | 0.158204958 | 0.401029198 |
| 1866 | PEPPER_CHRONIC_LYMPHOCYTIC_LEUKEMIA_DN                                    | 13  | Up   | 0.158360414 | 0.40120802  |
| 1867 | BENPORATH_SOX2_TARGETS                                                    | 718 | Down | 0.158794647 | 0.402092555 |
| 1868 | MATTIOLI_MULTIPLE_MYELOMA_SUBGROUPS                                       | 11  | Up   | 0.158911157 | 0.402094596 |
| 1869 | SHIN_B_CELL_LYMPHOMA_CLUSTER_1                                            | 6   | Down | 0.158965652 | 0.402094596 |

|      | A                                                                             | B         | C           | D                  | E                  |
|------|-------------------------------------------------------------------------------|-----------|-------------|--------------------|--------------------|
| 1870 | HOLLEMAN_DAUNORUBICIN_ALL_DN                                                  | 8         | Down        | 0.159218299        | 0.402439705        |
| 1871 | BIOCARTA_CHEMICAL_PATHWAY                                                     | 22        | Up          | 0.159272434        | 0.402439705        |
| 1872 | TAKAYAMA_BOUND_BY_AR                                                          | 8         | Up          | 0.159998946        | 0.403714355        |
| 1873 | CAFFAREL_RESPONSE_TO_THC_8HR_3_DN                                             | 10        | Down        | 0.160012377        | 0.403714355        |
| 1874 | LI_CISPLATIN_RESISTANCE_DN                                                    | 25        | Up          | 0.160033225        | 0.403714355        |
| 1875 | REACTOME_SLBP_DEPENDENT_PROCESSING_OF_REPLICATION_DEPENDENT_HISTONE_PRE_MRNAS | 11        | Down        | 0.160710761        | 0.405207228        |
| 1876 | DE_YY1_TARGETS_DN                                                             | 86        | Up          | 0.16101565         | 0.405759439        |
| 1877 | BIOCARTA_MTOR_PATHWAY                                                         | 23        | Down        | 0.161231736        | 0.405839622        |
| 1878 | FARDIN_HYPOXIA_11                                                             | 32        | Up          | 0.161284128        | 0.405839622        |
| 1879 | HELLER_HDAC_TARGETS_SILENCED_BY_METHYLATION_UP                                | 380       | Up          | 0.161305145        | 0.405839622        |
| 1880 | PID_FCER1_PATHWAY                                                             | 51        | Up          | 0.161483881        | 0.405945196        |
| 1881 | PIONTEK_PKD1_TARGETS_DN                                                       | 13        | Up          | 0.161518935        | 0.405945196        |
| 1882 | SMID_BREAST_CANCER_LUMINAL_A_DN                                               | 16        | Down        | 0.161829868        | 0.40611968         |
| 1883 | CHEOK_RESPONSE_TO_MERCAPTOPYRIMIDINE_AND_HD_MTX_UP                            | 5         | Down        | 0.161924569        | 0.40611968         |
| 1884 | KEGG_GLYCEROLIPID_METABOLISM                                                  | 39        | Up          | 0.161951567        | 0.40611968         |
| 1885 | MITSIADES_RESPONSE_TO_APLIDIN_DN                                              | 246       | Down        | 0.162057678        | 0.40611968         |
| 1886 | MOROSETTI_FACIOSCAPULOHUMERAL_MUSCULAR_DISTROPHY_DN                           | 11        | Up          | 0.162088628        | 0.40611968         |
| 1887 | <b>CHANGOLKAR_H2AFY_TARGETS_UP</b>                                            | <b>41</b> | <b>Up</b>   | <b>0.162104067</b> | <b>0.40611968</b>  |
| 1888 | REACTOME_PEPTIDE_LIGAND_BINDING_RECEPTORS                                     | 50        | Up          | 1.62E-01           | 4.07E-01           |
| 1889 | LEE_AGING_CEREBELLUM_UP                                                       | 62        | Up          | 1.63E-01           | 4.07E-01           |
| 1890 | MIKKELSEN_PLURIPOTENT_STATE_UP                                                | 9         | Down        | 0.16261765         | 0.406759343        |
| 1891 | OSWALD_HEMATOPOIETIC_STEM_CELL_IN_COLLAGEN_GEL_UP                             | 183       | Up          | 0.162885652        | 0.40721413         |
| 1892 | LEIN_LOCALIZED_TO_PROXIMAL_DENDRITES                                          | 32        | Up          | 0.163254001        | 0.407919173        |
| 1893 | REACTOME_SHC_MEDIATED_CASCADE                                                 | 16        | Down        | 0.163893376        | 0.409300319        |
| 1894 | <b>IKEDA_MIR30_TARGETS_DN</b>                                                 | <b>25</b> | <b>Down</b> | <b>0.16407656</b>  | <b>0.409541334</b> |

|      | A                                                                  | B   | C    | D           | E           |
|------|--------------------------------------------------------------------|-----|------|-------------|-------------|
| 1895 | BARRIER_CANCER_RELAPSE_TUMOR_SAMPLE_D<br>N                         | 12  | Up   | 0.164511143 | 0.410409267 |
| 1896 | LIANG_SILENCED_BY_METHYLATION_DN                                   | 11  | Down | 0.164780375 | 0.410863996 |
| 1897 | NUNODA_RESPONSE_TO_DASATINIB_IMATINIB_<br>DN                       | 12  | Up   | 0.16496944  | 0.411118463 |
| 1898 | PUJANA_BREAST_CANCER_LIT_INT_NETWORK                               | 100 | Down | 0.165076229 | 0.411144576 |
| 1899 | REACTOME_PROTEOLYTIC_CLEAVAGE_OF_SNARE<br>_COMPLEX_PROTEINS        | 14  | Down | 0.165153948 | 0.411144576 |
| 1900 | CHEMNITZ_RESPONSE_TO_PROSTAGLANDIN_E2_<br>UP                       | 143 | Down | 0.165270364 | 0.411217731 |
| 1901 | SWEET_LUNG_CANCER_KRAS_DN                                          | 313 | Up   | 0.165466531 | 0.411489136 |
| 1902 | MAINA_HYPOXIA_VHL_TARGETS_UP                                       | 6   | Up   | 0.165828396 | 0.412172104 |
| 1903 | ZHAN_EARLY_DIFFERENTIATION_GENES_DN                                | 33  | Up   | 0.165937231 | 0.412225771 |
| 1904 | SMIRNOV_RESPONSE_TO_IR_2HR_DN                                      | 50  | Up   | 0.166128077 | 0.412458918 |
| 1905 | WAKABAYASHI_ADIPOGENESIS_PPARG_RXRA_BO<br>UND_8D                   | 777 | Up   | 0.166205668 | 0.412458918 |
| 1906 | EBAUER_TARGETS_OF_PAX3_FOXO1_FUSION_U<br>P                         | 155 | Up   | 0.166704898 | 0.413480653 |
| 1907 | BARIS_THYROID_CANCER_DN                                            | 51  | Up   | 0.167110303 | 0.41426872  |
| 1908 | REACTOME_CREB_PHOSPHORYLATION_THROUG<br>H_THE_ACTIVATION_OF_CAMKII | 12  | Down | 0.167510533 | 0.414995901 |
| 1909 | MCCABE_HOXC6_TARGETS_DN                                            | 17  | Down | 0.167579297 | 0.414995901 |
| 1910 | SHETH_LIVER_CANCER_VS_TXNIP_LOSS_PAM6                              | 43  | Up   | 0.168147152 | 0.416184019 |
| 1911 | JAZAERI_BREAST_CANCER_BRCA1_VS_BRCA2_D<br>N                        | 33  | Down | 0.16829399  | 0.416329374 |
| 1912 | HOLLEMAN_PREDNISOLONE_RESISTANCE_ALL_U<br>P                        | 19  | Down | 0.168811909 | 0.417359488 |
| 1913 | FERRANDO_HOX11_NEIGHBORS                                           | 17  | Down | 0.168913134 | 0.417359488 |
| 1914 | LINDGREN_BLADDER_CANCER_CLUSTER_1_UP                               | 112 | Up   | 0.16899498  | 0.417359488 |
| 1915 | COLDREN_GEFITINIB_RESISTANCE_UP                                    | 82  | Up   | 0.169063716 | 0.417359488 |
| 1916 | LIANG_HEMATOPOIESIS_STEM_CELL_NUMBER_L<br>ARGE_VS_TINY_DN          | 38  | Down | 0.169458335 | 0.418115213 |



|      | A                                                              | B          | C         | D                  | E                  |
|------|----------------------------------------------------------------|------------|-----------|--------------------|--------------------|
| 1917 | REACTOME_RNA_POL_I_RNA_POL_III_AND_MITOCHONDRIAL_TRANSCRIPTION | 82         | Down      | 0.169741794        | 0.418514289        |
| 1918 | KEGG_MELANOGENESIS                                             | 77         | Down      | 0.169797226        | 0.418514289        |
| 1919 | BYSTRYKH_HEMATOPOIESIS_STEM_CELL_FLI1                          | 6          | Up        | 0.169951757        | 0.418676774        |
| 1920 | MOREAUX_B_LYMPHOCYTE_MATURATION_BY_TACI_DN                     | 73         | Down      | 0.170053359        | 0.418708767        |
| 1921 | LI_ADIPOGENESIS_BY_ACTIVATED_PPARG                             | 10         | Up        | 0.170237249        | 0.41894323         |
| 1922 | OHM_EMBRYONIC_CARCINOMA_UP                                     | 6          | Down      | 0.171207252        | 0.421111019        |
| 1923 | TIEN_INTESTINE_PROBIOTICS_2HR_UP                               | 26         | Up        | 0.172029752        | 0.422688771        |
| 1924 | MCBRYAN_PUBERTAL_TGFB1_TARGETS_DN                              | 46         | Up        | 0.17213638         | 0.422688771        |
| 1925 | LEIN_CHOROID_PLEXUS_MARKERS                                    | 74         | Up        | 0.172169302        | 0.422688771        |
| 1926 | REACTOME_BILE_ACID_AND_BILE_SALT_METABOLISM                    | 13         | Up        | 0.172206759        | 0.422688771        |
| 1927 | REACTOME_MAPK_TARGETS_NUCLEAR_EVENTS_MEDIATED_BY_MAP_KINASES   | 30         | Up        | 0.172295994        | 0.422688771        |
| 1928 | <b>ZHOU_INFLAMMATORY_RESPONSE_LPS_UP</b>                       | <b>276</b> | <b>Up</b> | <b>0.172551508</b> | <b>0.423095939</b> |
| 1929 | REACTOME_SYNTHESIS_SECRETION_AND_DEACYLATION_OF_GHRELIN        | 9          | Up        | 1.73E-01           | 4.24E-01           |
| 1930 | REACTOME_XENOBIOTICS                                           | 2          | Up        | 1.73E-01           | 4.24E-01           |
| 1931 | NIELSEN_LEIOMYOSARCOMA_UP                                      | 13         | Up        | 0.173221481        | 0.424078496        |
| 1932 | ZHANG_TLX_TARGETS_UP                                           | 98         | Up        | 0.173662309        | 0.424888438        |
| 1933 | MATZUK_CENTRAL_FOR_FEMALE_FERTILITY                            | 17         | Up        | 0.173734165        | 0.424888438        |
| 1934 | CASTELLANO_HRAS_AND_NRAS_TARGETS_DN                            | 8          | Up        | 0.173822085        | 0.424888438        |
| 1935 | <b>GUILLAUMOND_KLF10_TARGETS_DN</b>                            | <b>20</b>  | <b>Up</b> | <b>0.173989773</b> | <b>0.425078427</b> |
| 1936 | PID_TNF_PATHWAY                                                | 43         | Up        | 0.174092771        | 0.425110255        |
| 1937 | STARK_PREFRONTAL_CORTEX_22Q11_DELETION_UP                      | 183        | Down      | 0.174334627        | 0.425480946        |
| 1938 | KEGG_SYSTEMIC_LUPUS_ERYTHEMATOSUS                              | 58         | Down      | 0.174525741        | 0.425727478        |
| 1939 | HOSHIDA_LIVER_CANCER_SURVIVAL_UP                               | 60         | Up        | 0.174788416        | 0.426079751        |
| 1940 | PENG_GLUCOSE_DEPRIVATION_DN                                    | 149        | Down      | 0.174850505        | 0.426079751        |
| 1941 | BIOCARTA_IL1R_PATHWAY                                          | 25         | Up        | 0.174960633        | 0.426128347        |
| 1942 | MATHEW_FANCONI_ANEMIA_GENES                                    | 11         | Up        | 0.175227115        | 0.426557505        |

|      | A                                                                                 | B   | C    | D           | E           |
|------|-----------------------------------------------------------------------------------|-----|------|-------------|-------------|
| 1943 | KYNG_ENVIRONMENTAL_STRESS_RESPONSE_NO<br>T_BY_4NQO_IN_WS                          | 37  | Up   | 0.175661853 | 0.427395601 |
| 1944 | TONKS_TARGETS_OF_RUNX1_RUNX1T1_FUSION<br>_HSC_DN                                  | 122 | Up   | 0.175919787 | 0.427802878 |
| 1945 | WILLERT_WNT_SIGNALING                                                             | 19  | Up   | 0.176364831 | 0.428613788 |
| 1946 | WELCH_GATA1_TARGETS                                                               | 17  | Up   | 0.17643467  | 0.428613788 |
| 1947 | QI_HYPOXIA_TARGETS_OF_HIF1A_AND_FOXA2                                             | 36  | Down | 0.176730435 | 0.429111668 |
| 1948 | LIU_IL13_PRIMING_MODEL                                                            | 14  | Up   | 0.177041188 | 0.429402661 |
| 1949 | FIRESTEIN_CTNNB1_PATHWAY                                                          | 30  | Down | 0.177075202 | 0.429402661 |
| 1950 | TSUNODA_CISPLATIN_RESISTANCE_DN                                                   | 38  | Up   | 0.177122918 | 0.429402661 |
| 1951 | TAVAZOIE_METASTASIS                                                               | 66  | Up   | 0.177360102 | 0.429729976 |
| 1952 | CHIARADONNA_NEOPLASTIC_TRANSFORMATION<br>_KRAS_CDC25_DN                           | 38  | Up   | 0.177439827 | 0.429729976 |
| 1953 | REACTOME_SEMA3A_PAK_DEPENDENT_AXON_R<br>EPULSION                                  | 14  | Down | 0.177539268 | 0.429750533 |
| 1954 | PID_HEDGEHOG_2PATHWAY                                                             | 14  | Down | 0.177670487 | 0.429795074 |
| 1955 | BIOCARTA_IL22BP_PATHWAY                                                           | 11  | Up   | 0.177739592 | 0.429795074 |
| 1956 | TERAMOTO_OPN_TARGETS_CLUSTER_8                                                    | 6   | Up   | 0.177841811 | 0.429802228 |
| 1957 | REACTOME_RESOLUTION_OF_AP_SITES_VIA_THE<br>_SINGLE_NUCLEOTIDE_REPLACEMENT_PATHWAY | 11  | Down | 0.177924478 | 0.429802228 |
| 1958 | OLSSON_E2F3_TARGETS_UP                                                            | 25  | Up   | 0.178376303 | 0.430416136 |
| 1959 | MIKKELSEN_IPS_LCP_WITH_H3K4ME3                                                    | 104 | Up   | 0.178383862 | 0.430416136 |
| 1960 | ONDER_CDH1_TARGETS_2_DN                                                           | 364 | Up   | 0.178528675 | 0.430416136 |
| 1961 | GALIE_TUMOR_STEMNESS_GENES                                                        | 5   | Up   | 0.17854299  | 0.430416136 |
| 1962 | ELLWOOD_MYC_TARGETS_DN                                                            | 38  | Up   | 0.17888022  | 0.431009198 |
| 1963 | MULLIGHAN_MLL_SIGNATURE_1_DN                                                      | 186 | Up   | 0.179009898 | 0.431089585 |
| 1964 | YIH_RESPONSE_TO_ARSENITE_C2                                                       | 15  | Up   | 0.179096054 | 0.431089585 |
| 1965 | SESTO_RESPONSE_TO_UV_C0                                                           | 101 | Up   | 0.179357349 | 0.431498713 |
| 1966 | HATADA_METHYLATED_IN_LUNG_CANCER_DN                                               | 17  | Down | 0.179589393 | 0.431837089 |
| 1967 | NIELSEN_SCHWANNOMA_UP                                                             | 13  | Down | 0.179731386 | 0.431958697 |
| 1968 | REACTOME_HIV_INFECTION                                                            | 185 | Down | 0.179885415 | 0.432109094 |

|      | A                                                      | B          | C         | D                  | E                  |
|------|--------------------------------------------------------|------------|-----------|--------------------|--------------------|
| 1969 | <b>BASAKI_YBX1_TARGETS_DN</b>                          | <b>346</b> | <b>Up</b> | <b>0.180155946</b> | <b>0.432142976</b> |
| 1970 | RODRIGUES_THYROID_CARCI<br>_DN                         | 482        | Up        | 1.80E-01           | 4.32E-01           |
| 1971 | REACTOME_FORMATION_OF_IN<br>X_IN_GG_NER                | 19         | Down      | 1.80E-01           | 4.32E-01           |
| 1972 | HERNANDEZ_ABERRANT_MITOSIS_BY_DOCETACE<br>L_4NM_DN     | 7          | Up        | 0.180265356        | 0.432142976        |
| 1973 | MARTINEZ_RB1_TARGETS_DN                                | 431        | Up        | 0.180610685        | 0.432578755        |
| 1974 | HORIUCHI_WTAP_TARGETS_DN                               | 296        | Down      | 0.18063024         | 0.432578755        |
| 1975 | UEDA_CENTRAL_CLOCK                                     | 82         | Up        | 0.181227496        | 0.433789218        |
| 1976 | REACTOME_CHONDROITIN_SULFATE_BIOSYNTHESIS              | 17         | Down      | 0.181660929        | 0.434402941        |
| 1977 | REACTOME_FORMATION_OF_ATP_BY_CHEMIOS<br>MOTIC_COUPLING | 15         | Down      | 0.18166777         | 0.434402941        |
| 1978 | GENTILE_UV_RESPONSE_CLUSTER_D2                         | 39         | Up        | 0.181788609        | 0.434472016        |
| 1979 | SLEBOS_HEAD_AND_NECK_CANCER_WITH_HPV_<br>UP            | 68         | Up        | 0.181884176        | 0.434480653        |
| 1980 | GRUETZMANN_PANCREATIC_CANCER_DN                        | 176        | Up        | 0.181986009        | 0.434504242        |
| 1981 | SHEDDEN_LUNG_CANCER_POOR_SURVIVAL_A6                   | 433        | Down      | 0.182260533        | 0.434939908        |
| 1982 | REACTOME_APOPTOTIC_CLEAVAGE_OF_CELLULAR<br>PROTEINS    | 34         | Up        | 0.182487285        | 0.435261193        |
| 1983 | MADAN_DPPA4_TARGETS                                    | 26         | Up        | 0.182865777        | 0.435943893        |
| 1984 | BOUDOUKHA_BOUND_BY_IGF2BP2                             | 106        | Up        | 0.18296055         | 0.435949874        |
| 1985 | WUNDER_INFLAMMATORY_RESPONSE_AND_CHOLESTEROL_DN        | 4          | Up        | 0.18321983         | 0.43634763         |
| 1986 | REACTOME_UNWINDING_OF_DNA                              | 11         | Up        | 0.183620724        | 0.436707277        |
| 1987 | GAZDA_DIAMOND_BLACKFAN_ANEMIA_MYELOID<br>_DN           | 32         | Up        | 0.183631192        | 0.436707277        |
| 1988 | SENESE_HDAC1_TARGETS_DN                                | 235        | Up        | 0.183651658        | 0.436707277        |
| 1989 | REACTOME_ACTIVATED_POINT_MUTANTS_OF_F<br>GFR2          | 6          | Down      | 0.183740543        | 0.436707277        |

|      | A                                                            | B         | C         | D                  | E                  |
|------|--------------------------------------------------------------|-----------|-----------|--------------------|--------------------|
| 1990 | IIZUKA_LIVER_CANCER_PROGRESSION_G2_G3_UP                     | 23        | Up        | 0.184051531        | 0.437226488        |
| 1991 | BENPORATH_CYCLING_GENES                                      | 611       | Down      | 0.184367375        | 0.437756706        |
| 1992 | DEBIASI_APOPTOSIS_BY_REOVIRUS_INFECTION_DN                   | 284       | Up        | 0.18454816         | 0.437965875        |
| 1993 | DER_IFN_BETA_RESPONSE_UP                                     | 92        | Up        | 0.184922058        | 0.438632894        |
| 1994 | GARGALOVIC_RESPONSE_TO_OXIDIZED_PHOSPHOLIPIDS_LIGHTYELLOW_DN | 8         | Down      | 0.185147717        | 0.438881713        |
| 1995 | REACTOME_CASPASE_MEDIATED_CLEAVAGE_OF_CYTOSKELETAL_PROTEINS  | 11        | Up        | 0.18522203         | 0.438881713        |
| 1996 | CHOW_RASSF1_TARGETS_UP                                       | 26        | Up        | 0.185313264        | 0.438881713        |
| 1997 | CHEBOTAEV_GR_TARGETS_UP                                      | 60        | Up        | 0.185398497        | 0.438881713        |
| 1998 | REACTOME_MEMBRANE_TRAFFICKING                                | 116       | Up        | 0.186048919        | 0.440200873        |
| 1999 | GABRIELY_MIR21_TARGETS                                       | 277       | Up        | 0.186148027        | 0.440214928        |
| 2000 | PID_P53_DOWNSTREAM_PATHWAY                                   | 119       | Up        | 0.186408585        | 0.440610588        |
| 2001 | REACTOME_ERK_MAPK_TARGETS                                    | 21        | Up        | 0.186627865        | 0.44090833         |
| 2002 | LOPEZ_MESOTHELIOMA_SURVIVAL_WORST_VS_BEST_UP                 | 14        | Up        | 0.187172864        | 0.441974904        |
| 2003 | REACTOME_GLYCOGEN_BREAKDOWN_GLYCOGENOLYSIS                   | 15        | Up        | 0.18732011         | 0.442101658        |
| 2004 | ELVIDGE_HIF1A_AND_HIF2A_TARGETS_DN                           | 99        | Up        | 0.187652845        | 0.442665847        |
| 2005 | MARTINEZ_RB1_TARGETS_UP                                      | 543       | Up        | 0.187788412        | 0.442764595        |
| 2006 | VERNELL_RETINOBLASTOMA_PATHWAY_UP                            | 70        | Up        | 0.188103007        | 0.443117118        |
| 2007 | BIOCARTA_41BB_PATHWAY                                        | 13        | Up        | 0.188125489        | 0.443117118        |
| 2008 | JIANG_HYPOXIA_VIA_VHL                                        | 34        | Up        | 0.188222554        | 0.443124847        |
| 2009 | REACTOME_METABOLISM_OF_NUCLEOTIDES                           | 63        | Up        | 0.18861163         | 0.443819696        |
| 2010 | <b>BASSO_CD40_SIGNALING_UP</b>                               | <b>77</b> | <b>Up</b> | <b>0.188762528</b> | <b>0.443953681</b> |
| 2011 | BANDRES_RESPONSE_TO_CARMUSTIN_WITHOUT_MGMT_48HR_UP           | 11        | Down      | 1.90E-01           | 4.46E-01           |
| 2012 | CORRE_MULTIPLE_MYELOMA_DN                                    | 46        | Up        | 1.90E-01           | 4.47E-01           |
| 2013 | SETLUR_PROSTATE_CANCER_TMPRSS2_ERG_FUSION_DN                 | 10        | Up        | 0.190506839        | 0.447388079        |

|      | A                                                                                                          | B   | C    | D           | E           |
|------|------------------------------------------------------------------------------------------------------------|-----|------|-------------|-------------|
| 2014 | HAN_SATB1_TARGETS_UP                                                                                       | 340 | Up   | 0.19131144  | 0.449054423 |
| 2015 | ZHENG_GLIOMASTOMA_PLASTICITY_DN                                                                            | 53  | Up   | 0.191411051 | 0.449065152 |
| 2016 | LI_CISPLATIN_RESISTANCE_UP                                                                                 | 24  | Up   | 0.191741541 | 0.449617261 |
| 2017 | REACTOME_TRANSPORT_OF_GLUCOSE_AND_OTHER_SUGARS_BILE_SALTS_AND_ORGANIC_ACIDS_METAL_IONS_AND_AMINE_COMPOUNDS | 46  | Up   | 0.191990353 | 0.449977389 |
| 2018 | SARTIPIY_BLUNTED_BY_INSULIN_RESISTANCE_DN                                                                  | 16  | Up   | 0.192519236 | 0.450756099 |
| 2019 | TORCHIA_TARGETS_OF_EWSR1_FLI1_FUSION_T<br>OP20_UP                                                          | 15  | Up   | 0.192602787 | 0.450756099 |
| 2020 | HALMOS_CEBPA_TARGETS_DN                                                                                    | 37  | Up   | 0.192608797 | 0.450756099 |
| 2021 | CHIARETTI_T_ALL_REFRACTORY_TO_THERAPY                                                                      | 20  | Up   | 0.192722578 | 0.4507991   |
| 2022 | LEE_LIVER_CANCER_MYC_TGFA_DN                                                                               | 37  | Up   | 0.19336064  | 0.4520678   |
| 2023 | REACTOME_CTNNB1_PHOSPHORYLATION_CASCADE                                                                    | 16  | Down | 0.193814502 | 0.452904809 |
| 2024 | SU_THYMUS                                                                                                  | 9   | Down | 0.194319628 | 0.453860724 |
| 2025 | FIGUEROA_AML_METHYLATION_CLUSTER_5_UP                                                                      | 10  | Up   | 0.194715678 | 0.454561056 |
| 2026 | IRITANI_MAD1_TARGETS_UP                                                                                    | 9   | Up   | 0.194860519 | 0.454674545 |
| 2027 | KINNEY_DNMT1_METHYLATION_TARGETS                                                                           | 3   | Up   | 0.195065101 | 0.454927247 |
| 2028 | KEGG_NITROGEN_METABOLISM                                                                                   | 17  | Up   | 0.195294653 | 0.455237905 |
| 2029 | REACTOME_RNA_POL_III_TRANSCRIPTION                                                                         | 32  | Down | 0.195653121 | 0.455810164 |
| 2030 | XU_RESPONSE_TO_TRETINOIN_DN                                                                                | 10  | Up   | 0.195733084 | 0.455810164 |
| 2031 | KYNG_RESPONSE_TO_H2O2_VIA_ERCC6                                                                            | 14  | Down | 0.1962675   | 0.456645766 |
| 2032 | FIGUEROA_AML_METHYLATION_CLUSTER_1_UP                                                                      | 98  | Up   | 0.196285196 | 0.456645766 |
| 2033 | COLLIS_PRKDC_SUBSTRATES                                                                                    | 19  | Down | 0.196600156 | 0.456894552 |
| 2034 | MIKKELSEN_ES_ICP_WITH_H3K4ME3_AND_H3K27<br>ME3                                                             | 76  | Down | 0.196648426 | 0.456894552 |
| 2035 | KEGG_CARDIAC_MUSCLE_CONTRACTION                                                                            | 60  | Down | 0.196682226 | 0.456894552 |
| 2036 | REACTOME_METAL_ION_SLC_TRANSPORTERS                                                                        | 16  | Up   | 0.196992962 | 0.457215145 |
| 2037 | REACTOME_DIABETES_PATHWAYS                                                                                 | 111 | Up   | 0.197013764 | 0.457215145 |

|      | A                                              | B         | C           | D                  | E                  |
|------|------------------------------------------------|-----------|-------------|--------------------|--------------------|
| 2038 | BAKKER_FOXO3_TARGETS_DN                        | 153       | Down        | 0.197403829        | 0.457895479        |
| 2039 | MORI_IMMATURE_B_LYMPHOCYTE_UP                  | 42        | Up          | 0.197936273        | 0.458905245        |
| 2040 | CAMPS_COLON_CANCER_COPY_NUMBER_UP              | 62        | Down        | 0.198094285        | 0.459046344        |
| 2041 | REACTOME_SIGNALING_BY_NOTCH                    | 96        | Down        | 0.198221479        | 0.459061041        |
| 2042 | FIGUEROA_AML_METHYLATION_CLUSTER_3_UP          | 142       | Up          | 0.198364371        | 0.459061041        |
| 2043 | SMID_BREAST_CANCER_NORMAL_LIKE_UP              | 266       | Up          | 0.198392094        | 0.459061041        |
| 2044 | BILANGES_RAPAMYCIN_SENSITIVE_VIA_TSC1_AND_TSC2 | 71        | Down        | 0.199011155        | 0.460180803        |
| 2045 | MYLLYKANGAS_AMPLIFICATION_HOT_SPOT_14          | 3         | Up          | 0.199070807        | 0.460180803        |
| 2046 | VANDESLUIS_COMMD1_TARGETS_GROUP_4_DN           | 8         | Up          | 0.200414399        | 0.463060164        |
| 2047 | VANLOO_SP3_TARGETS_UP                          | 6         | Up          | 0.20078214         | 0.463683094        |
| 2048 | KEGG_GAP_JUNCTION                              | 72        | Up          | 0.20093471         | 0.463808746        |
| 2049 | HINATA_NFKB_TARGETS_KERATINOCYTE_DN            | 16        | Up          | 0.201364481        | 0.464573814        |
| 2050 | ISHIKAWA_STING_SIGNALING                       | 6         | Down        | 0.201639251        | 0.464980704        |
| 2051 | <b>BIOCARTA_IL12_PATHWAY</b>                   | <b>8</b>  | <b>Up</b>   | <b>0.201787517</b> | <b>0.465095618</b> |
| 2052 | CASTELLANO_NRAS_TARGETS_DN                     | 13        | Up          | 2.02E-01           | 4.65E-01           |
| 2053 | RAMJAUN_APOPTOSIS_BY_TGFB1_VIA_MAPK1_UP        | 6         | Down        | 2.02E-01           | 4.65E-01           |
| 2054 | PID_PDGFRB_PATHWAY                             | 123       | Up          | 0.20223323         | 0.465441798        |
| 2055 | GUO_HEX_TARGETS_DN                             | 52        | Up          | 0.202845351        | 0.466623311        |
| 2056 | FRASOR_RESPONSE_TO ESTRADIOL_UP                | 31        | Up          | 0.203130984        | 0.466907449        |
| 2057 | YAMASHITA_LIVER_CANCER_STEM_CELL_UP            | 38        | Down        | 0.2031665          | 0.466907449        |
| 2058 | <b>OLSSON_E2F3_TARGETS_DN</b>                  | <b>40</b> | <b>Down</b> | <b>0.203655457</b> | <b>0.467803615</b> |
| 2059 | IVANOV_MUTATED_IN_COLON_CANCER                 | 13        | Down        | 0.203831017        | 0.467979376        |
| 2060 | MENSSEN_MYC_TARGETS                            | 51        | Down        | 0.203974843        | 0.46799256         |
| 2061 | REACTOME_NRAGE_SIGNALS_DEATH_THROUGH_JNK       | 41        | Down        | 0.204034852        | 0.46799256         |
| 2062 | MUELLER_PLURINET                               | 291       | Down        | 0.204404538        | 0.468613023        |
| 2063 | REACTOME_ERKS_ARE_INACTIVATED                  | 12        | Up          | 0.204598428        | 0.468763877        |
| 2064 | SANSOM_WNT_PATHWAY_REQUIRE_MYC                 | 45        | Up          | 0.204668757        | 0.468763877        |

|      | A                                              | B   | C    | D           | E           |
|------|------------------------------------------------|-----|------|-------------|-------------|
| 2065 | NAGASHIMA_NRG1_SIGNALING_DN                    | 46  | Up   | 0.205228526 | 0.469797356 |
| 2066 | HU_ANGIOGENESIS_UP                             | 19  | Up   | 0.205318844 | 0.469797356 |
| 2067 | BIOCARTA_MPR_PATHWAY                           | 31  | Up   | 0.2055835   | 0.470112058 |
| 2068 | KEGG_ALDOSTERONE_REGULATED_SODIUM_REABSORPTION | 32  | Down | 0.20565537  | 0.470112058 |
| 2069 | REACTOME_G_ALPHA_S_SIGNALING_EVENTS            | 60  | Up   | 0.205824876 | 0.470190412 |
| 2070 | PUIFFE_INVASION_INHIBITED_BY_ASCITES_UP        | 77  | Down | 0.205916832 | 0.470190412 |
| 2071 | BIOCARTA_HDAC_PATHWAY                          | 23  | Down | 0.206004714 | 0.470190412 |
| 2072 | CHIANG_LIVER_CANCER_SUBCLASS_INTERFERON_UP     | 13  | Up   | 0.206087692 | 0.470190412 |
| 2073 | REACTOME_ZINC_TRANSPORTERS                     | 11  | Up   | 0.206935753 | 0.471753445 |
| 2074 | SMID_BREAST_CANCER_BASAL_DN                    | 518 | Up   | 0.206972464 | 0.471753445 |
| 2075 | LIU_SOX4_TARGETS_UP                            | 130 | Up   | 0.207156288 | 0.471944773 |
| 2076 | HUMMERICH_SKIN_CANCER_PROGRESSION_UP           | 70  | Up   | 0.207491321 | 0.47235434  |
| 2077 | LEIN_PONS_MARKERS                              | 69  | Up   | 0.207600064 | 0.47235434  |
| 2078 | BIOCARTA_GLEEVEC_PATHWAY                       | 22  | Up   | 0.207635971 | 0.47235434  |
| 2079 | HERNANDEZ_ABERRANT_MITOSIS_BY_DOCETAXEL_4NM_UP | 14  | Up   | 0.207749727 | 0.472385689 |
| 2080 | MIKKELSEN_MCV6_ICP_WITH_H3K4ME3_AND_H3K27ME3   | 17  | Up   | 0.207997433 | 0.472721439 |
| 2081 | LABBE_TGFB1_TARGETS_UP                         | 79  | Up   | 0.208119183 | 0.47277074  |
| 2082 | BENPORATH_ES_1                                 | 378 | Down | 0.208935456 | 0.474203423 |
| 2083 | PID_ECADHERIN_STABILIZATION_PATHWAY            | 39  | Up   | 0.208950588 | 0.474203423 |
| 2084 | REACTOME_INTEGRIN_CELL_SURFACE_INTERACTIONS    | 60  | Up   | 0.209354174 | 0.474618961 |
| 2085 | MAHADEVAN_IMATINIB_RESISTANCE_DN               | 11  | Down | 0.209355951 | 0.474618961 |
| 2086 | REACTOME_RNA_POL_I_PROMOTER_OPENING            | 27  | Down | 0.209435034 | 0.474618961 |
| 2087 | LABBE_TARGETS_OF_TGFB1_AND_WNT3A_UP            | 92  | Up   | 0.209734983 | 0.475070852 |
| 2088 | GAVIN_FOXP3_TARGETS_CLUSTER_P3                 | 122 | Up   | 0.209916486 | 0.475254142 |
| 2089 | HERNANDEZ_MITOTIC_ARREST_BY_DOCETAXEL_1_UP     | 24  | Up   | 0.21006544  | 0.475363604 |
| 2090 | ROPERO_HDAC2_TARGETS                           | 75  | Up   | 0.210201331 | 0.475443412 |

|      | A                                                    | B          | C         | D                  | E                  |
|------|------------------------------------------------------|------------|-----------|--------------------|--------------------|
| 2091 | PID_AP1_PATHWAY                                      | 52         | Up        | 0.211402614        | 0.477806354        |
| 2092 | <b>KUMAR_TARGETS_OF_MLL_AF9_FUSION</b>               | <b>296</b> | <b>Up</b> | <b>0.211514335</b> | <b>0.477806354</b> |
| 2093 | WEBER_METHYLATED_HCP_IN_SPERM_UP                     | 11         | Up        | 2.12E-01           | 4.78E-01           |
| 2094 | GHO_ATF5_TARGETS_UP                                  | 12         | Up        | 2.12E-01           | 4.78E-01           |
| 2095 | DAZARD_RESPONSE_TO_UV_NHEK_DN                        | 310        | Down      | 0.211960579        | 0.478277812        |
| 2096 | JIANG_VHL_TARGETS                                    | 134        | Up        | 0.212297279        | 0.478602225        |
| 2097 | KEGG_TGF_BETA_SIGNALING_PATHWAY                      | 68         | Up        | 0.212366025        | 0.478602225        |
| 2098 | DORN_ADENOVIRUS_INFECTION_32HR_UP                    | 10         | Up        | 0.212416216        | 0.478602225        |
| 2099 | <b>BIOCARTA_D4GDI_PATHWAY</b>                        | <b>10</b>  | <b>Up</b> | <b>0.212509517</b> | <b>0.478602225</b> |
| 2100 | PETROVA_PROX1_TARGETS_UP                             | 25         | Down      | 0.212728402        | 0.478866936        |
| 2101 | LEE_CALORIE_RESTRICTION_MUSCLE_UP                    | 28         | Up        | 0.212919666        | 0.479069249        |
| 2102 | YAO_TEMPORAL_RESPONSE_TO_PROGESTERON<br>E_CLUSTER_13 | 172        | Up        | 0.213359582        | 0.479822512        |
| 2103 | WAGNER_APO2_SENSITIVITY                              | 17         | Up        | 0.213457549        | 0.479822512        |
| 2104 | XU_AKT1_TARGETS_48HR                                 | 6          | Up        | 0.213754637        | 0.480261844        |
| 2105 | HASLINGER_B_CLL_WITH_11Q23_DELETION                  | 20         | Up        | 0.214169027        | 0.480550548        |
| 2106 | KAMIKUBO_MYELOID_MN1_NETWORK                         | 19         | Up        | 0.21419282         | 0.480550548        |
| 2107 | BIOCARTA_ALK_PATHWAY                                 | 27         | Down      | 0.214269025        | 0.480550548        |
| 2108 | LI_WILMS_TUMOR_VS_FETAL_KIDNEY_1_DN                  | 160        | Down      | 0.214289948        | 0.480550548        |
| 2109 | RAFFEL_VEGFA_TARGETS_UP                              | 8          | Down      | 0.214725071        | 0.481297894        |
| 2110 | MILI_PSEUDOPODIA_HAPTOTAXIS_UP                       | 504        | Up        | 0.215108095        | 0.481793886        |
| 2111 | DER_IFN_GAMMA_RESPONSE_UP                            | 63         | Up        | 0.215150286        | 0.481793886        |
| 2112 | MIKKELSEN_NPC_HCP_WITH_H3K4ME3_AND_H3K<br>27ME3      | 147        | Up        | 0.215411104        | 0.481955908        |
| 2113 | PID_THROMBIN_PAR4_PATHWAY                            | 10         | Up        | 0.215434464        | 0.481955908        |
| 2114 | REACTOME_EARLY_PHASE_OF_HIV_LIFE_CYCLE               | 12         | Down      | 0.215534557        | 0.481955908        |
| 2115 | FIGUEROA_AML_METHYLATION_CLUSTER_4_DN                | 10         | Down      | 0.215630643        | 0.481955908        |
| 2116 | GROSS_HYPOXIA_VIA_HIF1A_DN                           | 97         | Up        | 0.215734882        | 0.481960907        |
| 2117 | WIERENGA_STAT5A_TARGETS_GROUP1                       | 109        | Up        | 0.216001004        | 0.482327384        |
| 2118 | KENNY_CTNNB1_TARGETS_DN                              | 45         | Down      | 0.216341771        | 0.482685547        |
| 2119 | MARSON_BOUND_BY_FOXP3_STIMULATED                     | 859        | Up        | 0.216365712        | 0.482685547        |



|      | A                                                                                        | B         | C         | D                  | E                  |
|------|------------------------------------------------------------------------------------------|-----------|-----------|--------------------|--------------------|
| 2120 | REACTOME_BASE_FREE_SUGAR_PHOSPHATE_REMOVAL_VIA_THE_SINGLE_NUCLEOTIDE_REPLACEMENT_PATHWAY | 9         | Down      | 0.217719856        | 0.485477264        |
| 2121 | KEGG_MTOR_SIGNALING_PATHWAY                                                              | 47        | Up        | 0.220011598        | 0.490356039        |
| 2122 | WANG_RESPONSE_TO_FORSKOLIN_DN                                                            | 9         | Down      | 0.220432934        | 0.490864737        |
| 2123 | REACTOME_THROMBIN_SIGNALLING_THROUGH_PROTEINASE_ACTIVATED_RECEPTORS_PARS                 | 24        | Up        | 0.220539065        | 0.490864737        |
| 2124 | SERVITJA_LIVER_HNF1A_TARGETS_DN                                                          | 84        | Up        | 0.2205515          | 0.490864737        |
| 2125 | BERENJENO_TRANSFORMED_BY_RHOA_REVERSIBLY_UP                                              | 8         | Up        | 0.220678904        | 0.490917054        |
| 2126 | TAKEDA_TARGETS_OF_NUP98_HOXA9_FUSION_16D_UP                                              | 100       | Up        | 0.220903478        | 0.49118538         |
| 2127 | LIU_CMYB_TARGETS_UP                                                                      | 157       | Up        | 0.221399052        | 0.491884135        |
| 2128 | REACTOME_BILE_SALT_AND_ORGANIC_ANION_SLC_TRANSPORTERS                                    | 5         | Down      | 0.221425938        | 0.491884135        |
| 2129 | CHANG_POU5F1_TARGETS_DN                                                                  | 7         | Up        | 0.221702682        | 0.492177025        |
| 2130 | KOKKINAKIS_METHIONINE_DEPRIVATION_48HR_DN                                                | 63        | Up        | 0.221766114        | 0.492177025        |
| 2131 | ZEILSTRA_CD44_TARGETS_DN                                                                 | 5         | Up        | 0.221986447        | 0.492434724        |
| 2132 | GRANDVAUX_IRF3_TARGETS_DN                                                                | 16        | Up        | 0.222245282        | 0.492500363        |
| 2133 | <b>BIOCARTA_ACTINY_PATHWAY</b>                                                           | <b>19</b> | <b>Up</b> | <b>0.222275089</b> | <b>0.492500363</b> |
| 2134 | TONKS_TARGETS_OF_RUNX1_RUNX1T1_FUSION_SUSTAINED_IN GRANULOCYTE_UP                        | 10        | Down      | 2.22E-01           | 4.93E-01           |
| 2135 | REACTOME_TGF_BETA_RECEPTOR_SIGNALING_IN_EMT_EPITHELIAL_TO_MESENCHYMAL_TRANSITION         | 14        | Down      | 2.22E-01           | 4.93E-01           |
| 2136 | SIG_CHEMOTAXIS                                                                           | 39        | Down      | 0.222537201        | 0.492500363        |
| 2137 | RIZ_ERYTHROID_DIFFERENTIATION_CCNE1                                                      | 37        | Down      | 0.223120538        | 0.493425219        |
| 2138 | GAVIN_IL2_RESPONSIVE_FOXP3_TARGETS_DN                                                    | 3         | Down      | 0.223228524        | 0.493425219        |
| 2139 | KEGG_GLYCOSPHINGOLIPID_BIOSYNTHESIS_GANGLIOSERES                                         | 15        | Up        | 0.223268385        | 0.493425219        |
| 2140 | GENTILE_UV_HIGH_DOSE_UP                                                                  | 19        | Up        | 0.223862466        | 0.494468198        |

|      | A                                                       | B   | C    | D           | E           |
|------|---------------------------------------------------------|-----|------|-------------|-------------|
| 2141 | NIELSEN_GIST                                            | 87  | Up   | 0.223949618 | 0.494468198 |
| 2142 | REACTOME_FGFR_LIGAND_BINDING_AND_ACTIVATION             | 10  | Down | 0.224320714 | 0.495056223 |
| 2143 | BIOCARTA_STEM_PATHWAY                                   | 3   | Down | 0.224426826 | 0.495059175 |
| 2144 | BIOCARTA_GPCR_PATHWAY                                   | 32  | Up   | 0.224681838 | 0.495390427 |
| 2145 | KEGG_PRIMARY_BILE_ACID_BIOSYNTHESIS                     | 9   | Up   | 0.225257789 | 0.496411167 |
| 2146 | MOLENAAR_TARGETS_OF_CCND1_AND_CDK4_UP                   | 60  | Up   | 0.225449738 | 0.496411167 |
| 2147 | BOYLAN_MULTIPLE_MYELOMA_PCA3_DN                         | 51  | Up   | 0.225459971 | 0.496411167 |
| 2148 | ODONNELL_METASTASIS_DN                                  | 15  | Up   | 0.225844061 | 0.496860957 |
| 2149 | REACTOME_MHC_CLASS_II_ANTIGEN_PRESENTATION              | 84  | Down | 0.225874568 | 0.496860957 |
| 2150 | OKAMOTO_LIVER_CANCER_MULTICENTRIC_OCCURRENCE_DN         | 4   | Down | 0.226426334 | 0.497842916 |
| 2151 | TRAYNOR_RETT_SYNDROM_DN                                 | 13  | Up   | 0.226951502 | 0.49876551  |
| 2152 | JAIN_NFKB_SIGNALING                                     | 74  | Up   | 0.227778091 | 0.500319244 |
| 2153 | WESTON_VEGFA_TARGETS_6HR                                | 45  | Up   | 0.228032796 | 0.500319244 |
| 2154 | ZHAN_MULTIPLE_MYELOMA_SUBGROUPS                         | 30  | Down | 0.228039529 | 0.500319244 |
| 2155 | CALVET_IRINOTECAN_SENSITIVE_VS_RESISTANT_DN             | 5   | Down | 0.228082043 | 0.500319244 |
| 2156 | REACTOME_NUCLEAR_SIGNALING_BY_ERBB4                     | 25  | Up   | 0.228495942 | 0.500994583 |
| 2157 | GAUSSMANN_MLL_AF4_FUSION_TARGETS_B_UP                   | 22  | Up   | 0.228819345 | 0.501470967 |
| 2158 | MARTORIATI_MDM4_TARGETS_FETAL_LIVER_UP                  | 208 | Up   | 0.229063651 | 0.501773645 |
| 2159 | IIZUKA_LIVER_CANCER_PROGRESSION_G1_G2_UP                | 9   | Up   | 0.229315638 | 0.502092859 |
| 2160 | REACTOME_DESTABILIZATION_OF_MRNA_BY_TRISTETRAPROLIN_TTP | 17  | Down | 0.230394991 | 0.504053745 |
| 2161 | TAKEDA_TARGETS_OF_NUP98_HOXA9_FUSION_8D_DN              | 119 | Up   | 0.230451545 | 0.504053745 |
| 2162 | BASSO_HAIRY_CELL_LEUKEMIA_UP                            | 4   | Up   | 0.230531247 | 0.504053745 |

|      | A                                                                                                                    | B          | C           | D                  | E                  |
|------|----------------------------------------------------------------------------------------------------------------------|------------|-------------|--------------------|--------------------|
| 2163 | MARTINEZ_RESPONSE_TO_TRABECTEDIN_DN                                                                                  | 268        | Down        | 0.230785727        | 0.50428579         |
| 2164 | BIOCARTA_ACH_PATHWAY                                                                                                 | 11         | Down        | 0.230914436        | 0.50428579         |
| 2165 | REACTOME_SMAD2_SMAD3_SMAD4_HETEROTRIMER_REGULATES_TRANSCRIPTION                                                      | 25         | Up          | 0.230962313        | 0.50428579         |
| 2166 | RASHI_RESPONSE_TO_IONIZING_RADIATION_3                                                                               | 45         | Down        | 0.231064283        | 0.50428579         |
| 2167 | BIOCARTA_RARRXR_PATHWAY                                                                                              | 15         | Down        | 0.231187874        | 0.504322578        |
| 2168 | BURTON_ADIPOGENESIS_PEAK_AT_8HR                                                                                      | 35         | Up          | 0.231531467        | 0.504839032        |
| 2169 | NADLER_OBESITY_UP                                                                                                    | 48         | Up          | 0.231886948        | 0.505380917        |
| 2170 | PARK_HSC_VS_MULTIPOTENT_PROGENITORS_DN                                                                               | 15         | Down        | 0.233095963        | 0.507781663        |
| 2171 | BRUINS_UVC_RESPONSE_MIDDLE                                                                                           | 93         | Down        | 0.233343693        | 0.508087074        |
| 2172 | CHEN_LIVER_METABOLISM_QTL_CIS                                                                                        | 72         | Up          | 0.23359384         | 0.508393719        |
| 2173 | PID_HES_HEY_PATHWAY                                                                                                  | 39         | Down        | 0.233699716        | 0.508393719        |
| 2174 | <b>HONRADO_BREAST_CANCER_BRCA1_VS_BRCA2</b>                                                                          | <b>15</b>  | <b>Down</b> | <b>0.233905387</b> | <b>0.508606974</b> |
| 2175 | CHEN_LVAD_SUPPORT_OF_FAILING_HEART_DN                                                                                | 27         | Up          | 2.34E-01           | 5.09E-01           |
| 2176 | LEE_BMP2_TARGETS_UP                                                                                                  | 626        | Up          | 2.35E-01           | 5.10E-01           |
| 2177 | REACTOME_CELL_CELL_JUNCTION_ORGANIZATION                                                                             | 41         | Down        | 0.234816969        | 0.509885193        |
| 2178 | REACTOME_GROWTH_HORMONE_RECEPTOR_SIGNALING                                                                           | 19         | Up          | 0.235054935        | 0.509991585        |
| 2179 | BROWNE_HCMV_INFECTION_30MIN_UP                                                                                       | 39         | Up          | 0.235210296        | 0.509991585        |
| 2180 | MULLIGHAN_NPM1_MUTATED_SIGNATURE_1_UP                                                                                | 219        | Up          | 0.235258335        | 0.509991585        |
| 2181 | <b>YAO_TEMPORAL_RESPONSE_TO_PROGESTERONE_CLUSTER_17</b>                                                              | <b>181</b> | <b>Up</b>   | <b>0.235323933</b> | <b>0.509991585</b> |
| 2182 | REACTOME_OPSINS                                                                                                      | 1          | Up          | 0.235405639        | 0.509991585        |
| 2183 | REACTOME_REGULATION_OF_INSULIN_LIKE_GROWTH_FACTOR_IGF_ACTIVITY_BY_INSULIN_LIKE_GROWTH_FACTOR_BINDING_PROTEINS_IGFBPS | 9          | Down        | 0.235801463        | 0.510614992        |
| 2184 | DOANE_BREAST_CANCER_ESR1_UP                                                                                          | 82         | Up          | 0.236280649        | 0.511121011        |

|      | A                                                                       | B   | C    | D           | E           |
|------|-------------------------------------------------------------------------|-----|------|-------------|-------------|
| 2185 | SA_B_CELL_RECEPTOR_COMPLEXES                                            | 23  | Up   | 0.236305518 | 0.511121011 |
| 2186 | KEGG_RNA_POLYMERASE                                                     | 27  | Down | 0.236359663 | 0.511121011 |
| 2187 | PURBEY_TARGETS_OF_CTBP1_AND_SATB1_UP                                    | 78  | Up   | 0.236579035 | 0.511361362 |
| 2188 | IVANOVA_HEMATOPOIESIS_LATE_PROGENITOR                                   | 456 | Up   | 0.237036969 | 0.511950454 |
| 2189 | REACTOME_TRANSPORT_OF_MATURE_MRNA_DERIVED_FROM_AN_INTRONLESS_TRANSCRIPT | 33  | Down | 0.237068274 | 0.511950454 |
| 2190 | REACTOME_NEGATIVE_REGULATION_OF_FGFR_SIGNALING                          | 24  | Down | 0.237249176 | 0.512107062 |
| 2191 | NIKOLSKY_BREAST_CANCER_17Q11_Q21_AMPLICON                               | 90  | Down | 0.23741338  | 0.512227498 |
| 2192 | KEGG_SULFUR_METABOLISM                                                  | 10  | Down | 0.237527564 | 0.512239954 |
| 2193 | KEGG_VASOPRESSIN_REGULATED_WATER_REABSORPTION                           | 39  | Up   | 0.238462011 | 0.513780395 |
| 2194 | REACTOME_FGFR2C_LIGAND_BINDING_AND_ACTIVATION                           | 5   | Down | 0.238468528 | 0.513780395 |
| 2195 | PID_HDAC_CLASSIII_PATHWAY                                               | 22  | Up   | 0.238568082 | 0.513780395 |
| 2196 | MCCLUNG_CREB1_TARGETS_UP                                                | 85  | Up   | 0.23875019  | 0.513938335 |
| 2197 | XU_HGF_TARGETS_INDUCED_BY_AKT1_48HR_DN                                  | 25  | Down | 0.239322135 | 0.514907153 |
| 2198 | ZHAN_EARLY_DIFFERENTIATION_GENES_UP                                     | 6   | Up   | 0.239418204 | 0.514907153 |
| 2199 | PID_EPHA_FWDPATHWAY                                                     | 29  | Down | 0.239648774 | 0.515168543 |
| 2200 | CREIGHTON_ENDOCRINE_THERAPY_RESISTANCE_2                                | 353 | Up   | 0.239868062 | 0.515405454 |
| 2201 | XU_CREBBP_TARGETS_DN                                                    | 34  | Down | 0.240258713 | 0.516003834 |
| 2202 | REACTOME_ACTIVATION_OF_THE_AP1_FAMILY_OF_TRANSCRIPTION_FACTORS          | 10  | Up   | 0.24036496  | 0.516003834 |
| 2203 | YAO_TEMPORAL_RESPONSE_TO_PROGESTERONE_CLUSTER_3                         | 10  | Down | 0.240722354 | 0.516536387 |
| 2204 | JECHLINGER_EPITHELIAL_TO_MESENCHYMAL_TRANSITION_DN                      | 60  | Up   | 0.240933782 | 0.516755387 |
| 2205 | ROSS_AML_WITH_AML1_ETO_FUSION                                           | 59  | Up   | 0.241984439 | 0.518773354 |
| 2206 | NIKOLSKY_BREAST_CANCER_22Q13_AMPLICON                                   | 14  | Down | 0.242304407 | 0.519067044 |

|      | A                                                   | B         | C           | D                  | E                  |
|------|-----------------------------------------------------|-----------|-------------|--------------------|--------------------|
| 2207 | JUBAN_TARGETS_OF_SPI1_AND_FLI1_DN                   | 85        | Down        | 0.242341142        | 0.519067044        |
| 2208 | ST_TUMOR_NECROSIS_FACTOR_PATHWAY                    | 26        | Up          | 0.243011195        | 0.520266378        |
| 2209 | ZHENG_FOXP3_TARGETS_IN_T_LYMPHOCYTE_DN              | 30        | Up          | 0.243141615        | 0.520309843        |
| 2210 | WILENSKY_RESPONSE_TO_DARAPLADIB                     | 15        | Up          | 0.243707463        | 0.521083494        |
| 2211 | TAKAO_RESPONSE_TO_UVB_RADIATION_UP                  | 81        | Down        | 0.243723708        | 0.521083494        |
| 2212 | BLALOCK_ALZHEIMERS_DISEASE_INCIPIENT_UP             | 341       | Up          | 0.244143978        | 0.521738504        |
| 2213 | BHAT_ESR1_TARGETS_VIA_AKT1_UP                       | 248       | Up          | 0.244250914        | 0.521738504        |
| 2214 | TAYLOR_METHYLATED_IN_ACUTE_LYMPHOBLASTIC_LEUKEMIA   | 68        | Up          | 0.244496246        | 0.522008628        |
| 2215 | <b>BHAT_ESR1_TARGETS_VIA_AKT1_DN</b>                | <b>72</b> | <b>Down</b> | <b>0.244598329</b> | <b>0.522008628</b> |
| 2216 | REACTOME_CD28_CO_STIMULATION                        | 26        | Up          | 2.45E-01           | 5.23E-01           |
| 2217 | NIKOLSKY_BREAST_CANCER_7Q21_Q22_AMPLICON            | 58        | Up          | 2.45E-01           | 5.23E-01           |
| 2218 | DAIRKEE_CANCER_PRONE_RESPONSE_BPA                   | 44        | Down        | 0.245911974        | 0.524101975        |
| 2219 | AZARE_NEOPLASTIC_TRANSFORMATION_BY_STAT3_DN         | 11        | Up          | 0.246547001        | 0.525128748        |
| 2220 | BIOCARTA_IL2RB_PATHWAY                              | 33        | Up          | 0.246719654        | 0.525128748        |
| 2221 | REACTOME_CIRCADIAN_CLOCK                            | 49        | Up          | 0.246727158        | 0.525128748        |
| 2222 | <b>DORSAM_HOXA9_TARGETS_UP</b>                      | <b>34</b> | <b>Up</b>   | <b>0.247359189</b> | <b>0.525919211</b> |
| 2223 | KIM_RESPONSE_TO_TSA_AND_DECITABINE_UP               | 90        | Up          | 0.247438122        | 0.525919211        |
| 2224 | SCHLINGEMANN_SKIN_CARCINOGENESIS_TPA_DN             | 20        | Up          | 0.247502616        | 0.525919211        |
| 2225 | PID_WNT_NONCANONICAL_PATHWAY                        | 30        | Down        | 0.247618518        | 0.525919211        |
| 2226 | SMIRNOV_CIRCULATING_ENDOTHELIOCYTES_IN_CANCER_DN    | 2         | Down        | 0.247754575        | 0.525919211        |
| 2227 | MOROSETTI_FACIOSCAPULOHUMERAL_MUSCULAR_DISTROPHY_UP | 14        | Down        | 0.24790362         | 0.525919211        |
| 2228 | WEST_ADRENOCORTICAL_CARCINOMA_VS_ADENOMA_UP         | 16        | Down        | 0.247918097        | 0.525919211        |
| 2229 | PID_ARF6_PATHWAY                                    | 29        | Up          | 0.247988995        | 0.525919211        |

|      | A                                                                                 | B   | C    | D           | E           |
|------|-----------------------------------------------------------------------------------|-----|------|-------------|-------------|
| 2230 | KYNG_DNA_DAMAGE_BY_GAMMA_AND_UV_RA<br>DIATION                                     | 72  | Up   | 0.248201702 | 0.52613416  |
| 2231 | IKEDA_MIR1_TARGETS_DN                                                             | 7   | Down | 0.248396386 | 0.526310728 |
| 2232 | APPIERTO_RESPONSE_TO_FENRETINIDE_DN                                               | 43  | Up   | 0.24860466  | 0.526412071 |
| 2233 | REACTOME_TRANSPORT_OF_MATURE_TRANSCR<br>IPT_TO_CYTOPLASM                          | 53  | Down | 0.248929352 | 0.526412071 |
| 2234 | NABA_PROTEOGLYCANS                                                                | 12  | Down | 0.248980364 | 0.526412071 |
| 2235 | YAGI_AML_WITH_T_8_21_TRANSLOCATION                                                | 307 | Up   | 0.248980415 | 0.526412071 |
| 2236 | STAMBOLSKY_BOUND_BY_MUTATED_TP53                                                  | 15  | Up   | 0.249001265 | 0.526412071 |
| 2237 | PID_TAP63_PATHWAY                                                                 | 46  | Down | 0.249254339 | 0.526711426 |
| 2238 | KEGG_TYPE_II_DIABETES_MELLITUS                                                    | 39  | Down | 0.249412321 | 0.526809663 |
| 2239 | REACTOME_REGULATION_OF_SIGNALING_BY_CB<br>L                                       | 16  | Down | 0.249877898 | 0.527557223 |
| 2240 | PID_CD8_TCR_PATHWAY                                                               | 37  | Up   | 0.250986746 | 0.529661624 |
| 2241 | REACTOME_HS_GAG_BIOSYNTHESIS                                                      | 25  | Down | 0.251305748 | 0.529717846 |
| 2242 | WATTEL_AUTONOMOUS_THYROID_ADENOMA_U<br>P                                          | 55  | Down | 0.251648703 | 0.529717846 |
| 2243 | CASORELLI_APL_SECONDARY_VS_DE_NOVO_DN                                             | 9   | Down | 0.251680954 | 0.529717846 |
| 2244 | MAHAJAN_RESPONSE_TO_IL1A_DN                                                       | 68  | Up   | 0.251681315 | 0.529717846 |
| 2245 | REACTOME_P130CAS_LINKAGE_TO_MAPK_SIGNA<br>LING_FOR_INTEGRINS                      | 10  | Up   | 0.251683679 | 0.529717846 |
| 2246 | HEIDENBLAD_AMPLICON_12P11_12_UP                                                   | 29  | Down | 0.251686046 | 0.529717846 |
| 2247 | REACTOME_SYNTHESIS_OF_BILE_ACIDS_AND_BIL<br>E_SALTS_VIA_7ALPHA_HYDROXYCHOLESTEROL | 9   | Up   | 0.251863377 | 0.529855056 |
| 2248 | AMIT_EGF_RESPONSE_480_HELA                                                        | 161 | Up   | 0.252351639 | 0.53064597  |
| 2249 | REACTOME_BETA_DEFENSINS                                                           | 1   | Up   | 0.252852399 | 0.531462448 |
| 2250 | REACTOME_SIGNALING_BY_PDGF                                                        | 112 | Up   | 0.253429103 | 0.532191997 |
| 2251 | MANN_RESPONSE_TO_AMIFOSTINE_DN                                                    | 10  | Down | 0.2534835   | 0.532191997 |
| 2252 | NUNODA_RESPONSE_TO_DASATINIB_IMATINIB_<br>UP                                      | 29  | Up   | 0.253537393 | 0.532191997 |
| 2253 | BENPORATH_ES_CORE_NINE_CORRELATED                                                 | 88  | Up   | 0.25413065  | 0.532826707 |
| 2254 | GOLUB_ALL_VS_AML_UP                                                               | 22  | Down | 0.254143813 | 0.532826707 |

|      | A                                                                          | B         | C           | D                  | E                  |
|------|----------------------------------------------------------------------------|-----------|-------------|--------------------|--------------------|
| 2255 | GARGALOVIC_RESPONSE_TO_OXIDIZED_PHOSPHOLIPIDS_BLACK_DN                     | 10        | Down        | 0.254178073        | 0.532826707        |
| 2256 | <b>REACTOME_CONVERSION_FROM_APC_C_CDC20_TO_APC_C_CDH1_IN_LATE_ANAPHASE</b> | <b>16</b> | <b>Down</b> | <b>0.254366812</b> | <b>0.532985891</b> |
| 2257 | ZHAN_MULTIPLE_MYELOMA_LB_UP                                                | 33        | Up          | 2.55E-01           | 5.34E-01           |
| 2258 | MULLIGAN_NTF3_SIGNALING_VIA_INSR_AND_IGF1R_DN                              | 11        | Up          | 2.55E-01           | 5.34E-01           |
| 2259 | STEARMAN_LUNG_CANCER_EARLY_VS_LATE_DN                                      | 45        | Up          | 0.255133352        | 0.533881794        |
| 2260 | OUELLET_CULTURED_OVARIAN_CANCER_INVASIVE_VS_LMP_DN                         | 21        | Up          | 0.255751845        | 0.534939118        |
| 2261 | NADLER_HYPERGLYCEMIA_AT_OBESITY                                            | 49        | Down        | 0.256026161        | 0.535065093        |
| 2262 | NAISHIRO_CTNNB1_TARGETS_WITH_LEF1_MOTIF                                    | 7         | Up          | 0.256080699        | 0.535065093        |
| 2263 | <b>BIOCARTA_VDR_PATHWAY</b>                                                | <b>12</b> | <b>Down</b> | <b>0.256151797</b> | <b>0.535065093</b> |
| 2264 | OSAWA_TNF_TARGETS                                                          | 7         | Up          | 0.256519023        | 0.535595397        |
| 2265 | HOEGERKORP_CD44_TARGETS_DIRECT_UP                                          | 18        | Down        | 0.256838201        | 0.536024955        |
| 2266 | EHLERS_ANEUPLOIDY_DN                                                       | 11        | Up          | 0.257547238        | 0.537266474        |
| 2267 | LIN_NPAS4_TARGETS_DN                                                       | 55        | Down        | 0.25766959         | 0.537266474        |
| 2268 | WEBER_METHYLATED_HCP_IN_FIBROBLAST_DN                                      | 15        | Up          | 0.257774201        | 0.537266474        |
| 2269 | WANG_LSD1_TARGETS_UP                                                       | 19        | Down        | 0.25799395         | 0.537487397        |
| 2270 | DAZARD_RESPONSE_TO_UV_NHEK_UP                                              | 194       | Up          | 0.258324699        | 0.537668577        |
| 2271 | JIANG_AGING_CEREBRAL_CORTEX_UP                                             | 34        | Up          | 0.258373487        | 0.537668577        |
| 2272 | BIOCARTA_VEGF_PATHWAY                                                      | 28        | Up          | 0.258422294        | 0.537668577        |
| 2273 | BIOCARTA_RAB_PATHWAY                                                       | 12        | Up          | 0.258761859        | 0.53813811         |
| 2274 | GOTZMANN_EPITHELIAL_TO_MESENCHYMAL_TRANSITION_DN                           | 172       | Up          | 0.258983556        | 0.538362209        |
| 2275 | PID_PI3KCI_AKT_PATHWAY                                                     | 35        | Down        | 0.260102647        | 0.54045075         |
| 2276 | RASHI_RESPONSE_TO_IONIZING_RADIATION_6                                     | 59        | Down        | 0.260290244        | 0.540602814        |
| 2277 | HALMOS_CEBPA_TARGETS_UP                                                    | 38        | Up          | 0.261011482        | 0.54177911         |
| 2278 | YORDY_RECIPROCAL_REGULATION_BY_ETS1_AND_SP100_DN                           | 66        | Up          | 0.261085933        | 0.54177911         |

|      | A                                                                      | B         | C         | D                  | E                  |
|------|------------------------------------------------------------------------|-----------|-----------|--------------------|--------------------|
| 2279 | BEIER_GLIOMA_STEM_CELL_UP                                              | 31        | Up        | 0.261272852        | 0.541848626        |
| 2280 | BUKANOVICH_T_LYMPHOCYTE_HOMING_ON_T<br>UMOR_UP                         | 20        | Up        | 0.261420456        | 0.541848626        |
| 2281 | VERRECCHIA_DELAYED_RESPONSE_TO_TGFB1                                   | 37        | Down      | 0.261463464        | 0.541848626        |
| 2282 | GARGALOVIC_RESPONSE_TO_OXIDIZED_PHOSPH<br>OLIPIDS_LIGHTYELLOW_UP       | 11        | Up        | 0.261656278        | 0.542010485        |
| 2283 | MARTINEZ_RESPONSE_TO TRABECTEDIN_UP                                    | 65        | Up        | 0.262088032        | 0.542666937        |
| 2284 | CADWELL_ATG16L1_TARGETS_DN                                             | 57        | Up        | 0.26248931         | 0.543259742        |
| 2285 | WATANABE_RECTAL_CANCER_RADIOOTHERAPY_R<br>ESPONSIVE_DN                 | 83        | Up        | 0.262786547        | 0.543636793        |
| 2286 | BIOCARTA_CACAM_PATHWAY                                                 | 10        | Up        | 0.262998049        | 0.543836228        |
| 2287 | BIOCARTA_FREE_PATHWAY                                                  | 7         | Up        | 0.263176607        | 0.543967397        |
| 2288 | SASSON_RESPONSE_TO_GONADOTROPHINS_UP                                   | 84        | Up        | 0.263950068        | 0.545327534        |
| 2289 | MARKS_HDAC_TARGETS_DN                                                  | 11        | Up        | 0.26418729         | 0.545579084        |
| 2290 | ENK_UV_RESPONSE_EPIDERMIS_UP                                           | 256       | Up        | 0.265022579        | 0.547064957        |
| 2291 | MUNSHI_MULTIPLE_MYELOMA_UP                                             | 70        | Up        | 0.265217142        | 0.547105457        |
| 2292 | FIGUEROA_AML_METHYLATION_CLUSTER_1_DN                                  | 31        | Up        | 0.265301593        | 0.547105457        |
| 2293 | KYNG_RESPONSE_TO_H2O2_VIA_ERCC6_UP                                     | 33        | Up        | 0.265389567        | 0.547105457        |
| 2294 | ABBUD_LIF_SIGNALING_2_DN                                               | 4         | Down      | 0.26589126         | 0.547687087        |
| 2295 | GUO_HEX_TARGETS_UP                                                     | 78        | Up        | 0.265983081        | 0.547687087        |
| 2296 | OXFORD_RALA_AND_RALB_TARGETS_UP                                        | 8         | Up        | 0.266070281        | 0.547687087        |
| 2297 | <b>SMID_BREAST_CANCER_RELAPSE_IN_LUNG_DN</b>                           | <b>17</b> | <b>Up</b> | <b>0.266135355</b> | <b>0.547687087</b> |
| 2298 | REACTOME_CELL_JUNCTION_ORGANIZATION                                    | 61        | Up        | 2.67E-01           | 5.48E-01           |
| 2299 | NOUSHMEHR_GBM_SOMATIC_MUTATED                                          | 9         | Up        | 2.67E-01           | 5.48E-01           |
| 2300 | REACTOME_NUCLEAR_EVENTS_KINASE_AND_TR<br>ANSCRIPTION_FACTOR_ACTIVATION | 24        | Up        | 0.266722401        | 0.548062934        |
| 2301 | EHRlich_ICF_SYNDROM_DN                                                 | 10        | Up        | 0.266781957        | 0.548062934        |
| 2302 | TESAR_JAK_TARGETS_MOUSE_ES_D3_DN                                       | 4         | Down      | 0.26728007         | 0.548847602        |
| 2303 | BIOCARTA_AT1R_PATHWAY                                                  | 30        | Up        | 0.267652158        | 0.549372914        |



|      | A                                                        | B    | C    | D           | E           |
|------|----------------------------------------------------------|------|------|-------------|-------------|
| 2304 | BIOCARTA_PML_PATHWAY                                     | 12   | Down | 0.267864462 | 0.549569944 |
| 2305 | DELASERNA_MYOD_TARGETS_UP                                | 74   | Down | 0.268145095 | 0.54977124  |
| 2306 | VALK_AML_WITH_T_8_21_TRANSLOCATION                       | 4    | Up   | 0.268195282 | 0.54977124  |
| 2307 | KYNG_DNA_DAMAGE_BY_GAMMA_RADIATION                       | 65   | Up   | 0.268906979 | 0.5509911   |
| 2308 | PUJANA_BRCA1_PCC_NETWORK                                 | 1480 | Down | 0.269625311 | 0.552223492 |
| 2309 | KEGG_GNRH_SIGNALING_PATHWAY                              | 78   | Up   | 0.270432362 | 0.553636443 |
| 2310 | BILANGES_SERUM_SENSITIVE_VIA_TSC2                        | 36   | Down | 0.27068213  | 0.55390778  |
| 2311 | REACTOME_CELL_CYCLE_CHECKPOINTS                          | 109  | Down | 0.270891564 | 0.553908535 |
| 2312 | BOGNI_TREATMENT_RELATED_MYELOID_LEUKE<br>MIA_DN          | 31   | Down | 0.270916958 | 0.553908535 |
| 2313 | NING_CHRONIC_OBSTRUCTIVE_PULMONARY_DIS<br>EASE_DN        | 103  | Up   | 0.271103291 | 0.554049762 |
| 2314 | PID_CXCR3_PATHWAY                                        | 33   | Down | 0.271680697 | 0.554614172 |
| 2315 | ACOSTA_PROLIFERATION_INDEPENDENT_MYC_T<br>ARGETS_DN      | 95   | Up   | 0.271726775 | 0.554614172 |
| 2316 | BIOCARTA_RACCYCD_PATHWAY                                 | 26   | Up   | 0.2718241   | 0.554614172 |
| 2317 | HOFMANN_CELL_LYMPHOMA_DN                                 | 33   | Down | 0.271848978 | 0.554614172 |
| 2318 | RIZ_ERYTHROID_DIFFERENTIATION_HEMGN                      | 18   | Up   | 0.272998727 | 0.556719458 |
| 2319 | ZHAN_VARIABLE_EARLY_DIFFERENTIATION_GEN<br>ES_DN         | 30   | Down | 0.273352317 | 0.557200042 |
| 2320 | MACLACHLAN_BRCA1_TARGETS_DN                              | 14   | Up   | 0.273701729 | 0.557465178 |
| 2321 | VERHAAK_GLIOMASTOMA_CLASSICAL                            | 146  | Up   | 0.273718352 | 0.557465178 |
| 2322 | KEGG_BLADDER_CANCER                                      | 37   | Up   | 0.274081773 | 0.557849829 |
| 2323 | REACTOME_NEGATIVE_REGULATORS_OF_RIG_I_<br>MDA5_SIGNALING | 29   | Up   | 0.274143344 | 0.557849829 |
| 2324 | KEGG_HISTIDINE_METABOLISM                                | 17   | Up   | 0.274957131 | 0.558927875 |
| 2325 | REACTOME_MITOCHONDRIAL_PROTEIN_IMPORT                    | 50   | Down | 0.275020101 | 0.558927875 |
| 2326 | PID_FGF_PATHWAY                                          | 46   | Up   | 0.275100492 | 0.558927875 |
| 2327 | PRAMOONJAGO_SOX4_TARGETS_DN                              | 50   | Down | 0.275171765 | 0.558927875 |
| 2328 | ODONNELL_TFRC_TARGETS_UP                                 | 304  | Up   | 0.275264585 | 0.558927875 |
| 2329 | PID_BETA_CATENIN_NUC_PATHWAY                             | 68   | Down | 0.276043458 | 0.560248754 |

|      | A                                                             | B         | C           | D                  | E                  |
|------|---------------------------------------------------------------|-----------|-------------|--------------------|--------------------|
| 2330 | GARGALOVIC_RESPONSE_TO_OXIDIZED_PHOSPH<br>OLIPIDS_BLUE_DN     | 49        | Down        | 0.276152243        | 0.560248754        |
| 2331 | REACTOME_REGULATION_OF_PYRUVATE_DEHYD<br>ROGENASE_PDH_COMPLEX | 11        | Up          | 0.276465541        | 0.560643641        |
| 2332 | MIKKELSEN_MCV6_ICP_WITH_H3K27ME3                              | 30        | Up          | 0.277201917        | 0.561895777        |
| 2333 | CAFFAREL_RESPONSE_TO_THC_8HR_5_UP                             | 16        | Up          | 0.277399367        | 0.562054892        |
| 2334 | FLECHNER_PBL_KIDNEY_TRANSPLANT_REJECTED<br>_VS_OK_UP          | 61        | Up          | 0.277999606        | 0.562838862        |
| 2335 | REACTOME_RNA_POL_I_TRANSCRIPTION                              | 50        | Down        | 0.278087607        | 0.562838862        |
| 2336 | GARCIA_TARGETS_OF_FLI1_AND_DAX1_UP                            | 55        | Down        | 0.278243401        | 0.562838862        |
| 2337 | KEGG_LIMONENE_AND_PINENE_DEGRADATION                          | 10        | Up          | 0.278374673        | 0.562838862        |
| 2338 | <b>SCHAVOLT_TARGETS_OF_TP53_AND_TP63</b>                      | <b>14</b> | <b>Up</b>   | <b>0.278381888</b> | <b>0.562838862</b> |
| 2339 | LIANG_SILENCED_BY_METHYLATION_UP                              | 22        | Up          | 2.79E-01           | 5.64E-01           |
| 2340 | LIU_VMYB_TARGETS_UP                                           | 126       | Up          | 2.79E-01           | 5.64E-01           |
| 2341 | SA_G1_AND_S_PHASES                                            | 13        | Up          | 0.279350034        | 0.564072185        |
| 2342 | BLALOCK_ALZHEIMERS_DISEASE_DN                                 | 1161      | Up          | 0.279641443        | 0.564419402        |
| 2343 | ROVERSI_GLIOMA_COPY_NUMBER_DN                                 | 36        | Up          | 0.280628697        | 0.566170193        |
| 2344 | KEGG_GRAFT_VERSUS_HOST_DISEASE                                | 16        | Up          | 0.281197431        | 0.567075485        |
| 2345 | <b>REACTOME_TIE2_SIGNALING</b>                                | <b>14</b> | <b>Down</b> | <b>0.282612561</b> | <b>0.569686157</b> |
| 2346 | MARTENS_TRETINOIN_RESPONSE_DN                                 | 711       | Down        | 0.283230543        | 0.570389937        |
| 2347 | DIAZ_CHRONIC_MEYLOGENOUS_LEUKEMIA_UP                          | 1334      | Up          | 0.283270315        | 0.570389937        |
| 2348 | BROWNE_HCMV_INFECTION_10HR_UP                                 | 76        | Down        | 0.283547107        | 0.570389937        |
| 2349 | FINETTI_BREAST_CANCERS_KINOME_GRAY                            | 15        | Up          | 0.28373284         | 0.570389937        |
| 2350 | REACTOME_CRMP5_IN_SEMA3A_SIGNALING                            | 14        | Down        | 0.283745817        | 0.570389937        |
| 2351 | ST_ADRENERGIC                                                 | 24        | Up          | 0.283761878        | 0.570389937        |
| 2352 | BILD_E2F3_ONCOGENIC_SIGNATURE                                 | 219       | Up          | 0.283806718        | 0.570389937        |
| 2353 | PID_IL3_PATHWAY                                               | 22        | Up          | 0.284914615        | 0.57237311         |
| 2354 | DAIRKEE_CANCER_PRONE_RESPONSE_BPA_E2                          | 102       | Up          | 0.28510785         | 0.572517888        |
| 2355 | BIOCARTA_IL4_PATHWAY                                          | 9         | Up          | 0.285956259        | 0.573977623        |
| 2356 | FIGUEROA_AML_METHYLATION_CLUSTER_2_UP                         | 44        | Up          | 0.286169014        | 0.57416076         |

|      | A                                                                      | B   | C    | D           | E           |
|------|------------------------------------------------------------------------|-----|------|-------------|-------------|
| 2357 | REACTOME_VITAMIN_B5_PANTOTHENATE_META<br>BOLISM                        | 11  | Up   | 0.287167922 | 0.575842578 |
| 2358 | BAELDE_DIABETIC_NEPHROPATHY_UP                                         | 62  | Up   | 0.287250996 | 0.575842578 |
| 2359 | BIOCARTA_MTA3_PATHWAY                                                  | 14  | Down | 0.287506114 | 0.57610958  |
| 2360 | KOMMAGANI_TP63_GAMMA_TARGETS                                           | 9   | Down | 0.287735078 | 0.576221884 |
| 2361 | ZWANG_EGF_INTERVAL_DN                                                  | 180 | Down | 0.287806063 | 0.576221884 |
| 2362 | GAZDA_DIAMOND_BLACKFAN_ANEMIA_MYELOID<br>_UP                           | 28  | Up   | 0.288352096 | 0.576411995 |
| 2363 | REACTOME_RNA_POL_III_TRANSCRIPTION_INITIA<br>TION_FROM_TYPE_3_PROMOTER | 25  | Down | 0.288528829 | 0.576411995 |
| 2364 | KEGG_PANCREATIC_CANCER                                                 | 64  | Up   | 0.288574115 | 0.576411995 |
| 2365 | SWEET_KRAS_ONCOGENIC_SIGNATURE                                         | 77  | Up   | 0.288574126 | 0.576411995 |
| 2366 | JAERVINEN_AMPLIFIED_IN_LARYNGEAL_CANCER                                | 35  | Down | 0.288743677 | 0.576411995 |
| 2367 | PEREZ_TP63_TARGETS                                                     | 289 | Down | 0.288851776 | 0.576411995 |
| 2368 | GHANDHI_BYSTANDER_IRRADIATION_DN                                       | 11  | Down | 0.288915891 | 0.576411995 |
| 2369 | REACTOME_PURINE_METABOLISM                                             | 30  | Up   | 0.288968538 | 0.576411995 |
| 2370 | MYLLYKANGAS_AMPLIFICATION_HOT_SPOT_11                                  | 3   | Up   | 0.28900441  | 0.576411995 |
| 2371 | SHARMA_PILOCYTIC_ASTROCYTOMA_LOCATION_<br>DN                           | 4   | Up   | 0.289120937 | 0.576411995 |
| 2372 | REACTOME_SYNTHESIS_OF_PIPS_AT_THE_GOLGI<br>_MEMBRANE                   | 15  | Up   | 0.290041718 | 0.578003845 |
| 2373 | GRADE_COLON_CANCER_UP                                                  | 789 | Down | 0.290403671 | 0.578481174 |
| 2374 | TONKS_TARGETS_OF_RUNX1_RUNX1T1_FUSION<br>_SUSTAINED_IN GRANULOCYTE_DN  | 3   | Up   | 0.290588347 | 0.578491788 |
| 2375 | REACTOME_RAS_ACTIVATION_UOPN_CA2_INFUX<br>_THROUGH_NMDA_RECEPTOR       | 14  | Down | 0.290653863 | 0.578491788 |
| 2376 | REACTOME_PRE_NOTCH_TRANSCRIPTION_AND_<br>TRANSLATION                   | 26  | Down | 0.29082905  | 0.578596742 |
| 2377 | HOFFMANN_SMALL_PRE_BII_TO_IMMATURE_B_<br>LYMPHOCYTE_UP                 | 46  | Up   | 0.291570051 | 0.579826807 |
| 2378 | MYLLYKANGAS_AMPLIFICATION_HOT_SPOT_22                                  | 11  | Up   | 0.29192163  | 0.579978541 |

|      | A                                                  | B          | C           | D                  | E                  |
|------|----------------------------------------------------|------------|-------------|--------------------|--------------------|
| 2379 | <b>BROWNE_HCMV_INFECTION_20HR_UP</b>               | <b>219</b> | <b>Down</b> | <b>0.291938922</b> | <b>0.579978541</b> |
| 2380 | BROWNE_HCMV_INFECTION_12HR_DN                      | 89         | Up          | 2.92E-01           | 5.80E-01           |
| 2381 | BRUINS_UVC_RESPONSE_VIA_TP53_GROUP_A               | 652        | Up          | 2.92E-01           | 5.81E-01           |
| 2382 | PID_HNF3A_PATHWAY                                  | 26         | Up          | 0.292900903        | 0.581250217        |
| 2383 | ZHOU_INFLAMMATORY_RESPONSE_LIVE_DN                 | 323        | Down        | 0.293181588        | 0.581562973        |
| 2384 | ABRAHAM_ALPC_VS_MULTIPLE_MYELOMA_DN                | 19         | Up          | 0.293307438        | 0.581568462        |
| 2385 | SANSOM_APC_TARGETS_DN                              | 239        | Up          | 0.294039318        | 0.582775075        |
| 2386 | <b>BIOCARTA_SPRY_PATHWAY</b>                       | <b>18</b>  | <b>Up</b>   | <b>0.294176717</b> | <b>0.58280293</b>  |
| 2387 | PASQUALUCCI_LYMPHOMA_BY_GC_STAGE_DN                | 136        | Up          | 0.294937738        | 0.584065721        |
| 2388 | MCMURRAY_TP53_HRAS_COOPERATION_RESPONSE_UP         | 18         | Up          | 0.29530775         | 0.584553463        |
| 2389 | LIM_MAMMARY_STEM_CELL_DN                           | 387        | Up          | 0.295434161        | 0.584558799        |
| 2390 | PID_TRAIL_PATHWAY                                  | 25         | Up          | 0.295947093        | 0.585328595        |
| 2391 | PID_NFKAPPAB_CANONICAL_PATHWAY                     | 21         | Up          | 0.296091286        | 0.585368755        |
| 2392 | CAFFAREL_RESPONSE_TO_THC_24HR_5_UP                 | 33         | Up          | 0.296707249        | 0.586144878        |
| 2393 | MIKKELSEN_NPC_ICP_WITH_H3K4ME3                     | 376        | Up          | 0.296731968        | 0.586144878        |
| 2394 | REACTOME_ACYL_CHAIN_REMODELLING_OF_PG              | 8          | Up          | 0.296895718        | 0.586207887        |
| 2395 | KEGG_BASAL_TRANSCRIPTION_FACTORS                   | 31         | Down        | 0.297011996        | 0.586207887        |
| 2396 | OUELLET_CULTURED_OVARIAN_CANCER_INVASIVE_VS_LMP_UP | 64         | Up          | 0.297255286        | 0.5864431          |
| 2397 | TAVOR_CEBPA_TARGETS_DN                             | 19         | Up          | 0.297733651        | 0.587141695        |
| 2398 | KORKOLA_EMBRYONIC_CARCINOMA_VS_SEMINOMA_UP         | 22         | Up          | 0.298264599        | 0.587687286        |
| 2399 | OUILLETTE_CLL_13Q14_DELETION_UP                    | 66         | Down        | 0.298489165        | 0.587687286        |
| 2400 | KEGG_AUTOIMMUNE_THYROID_DISEASE                    | 16         | Up          | 0.298534829        | 0.587687286        |
| 2401 | KEGG_ALLOGRAFT_REJECTION                           | 16         | Up          | 0.298534829        | 0.587687286        |
| 2402 | IKEDA_MIR30_TARGETS_UP                             | 115        | Up          | 0.298632206        | 0.587687286        |
| 2403 | HUTTMANN_B_CLL_POOR_SURVIVAL_DN                    | 50         | Up          | 0.299156687        | 0.588474332        |
| 2404 | REACTOME_REGULATION_OF_IFNG_SIGNALING              | 12         | Up          | 0.299306934        | 0.588524871        |
| 2405 | NAKAYAMA_SOFT_TISSUE_TUMORS_PCA2_DN                | 50         | Up          | 0.299614682        | 0.588702416        |

|      | A                                                                                                       | B          | C         | D                  | E                  |
|------|---------------------------------------------------------------------------------------------------------|------------|-----------|--------------------|--------------------|
| 2406 | MYLLYKANGAS_AMPLIFICATION_HOT_SPOT_3                                                                    | 4          | Down      | 0.299646415        | 0.588702416        |
| 2407 | PID_NFKAPPAB_ATYPICAL_PATHWAY                                                                           | 17         | Down      | 0.299811105        | 0.588781161        |
| 2408 | SAENZ_DETOX_PATHWAY_AND_CARCI NOGENESIS_DN                                                              | 8          | Up        | 0.300208232        | 0.589316118        |
| 2409 | BOYLAN_MULTIPLE_MYELOMA_D_DN                                                                            | 62         | Up        | 0.300556857        | 0.589457215        |
| 2410 | REACTOME_NEF_MEDIATES_DOWN_MODULATION_OF_CELL_SURFACE_RECEPTORS_BY_RECRUITING_THEM_TO_CLATHRIN_ADAPTERS | 18         | Up        | 0.300691293        | 0.589457215        |
| 2411 | GEISS_RESPONSE_TO_DSRNA_UP                                                                              | 34         | Up        | 0.300718269        | 0.589457215        |
| 2412 | SCHEIDEREIT_IKK_TARGETS                                                                                 | 16         | Up        | 0.30077912         | 0.589457215        |
| 2413 | PID_TRKR_PATHWAY                                                                                        | 59         | Down      | 0.301227589        | 0.589881117        |
| 2414 | REACTOME_ENDOSOMAL_SORTING_COMPLEX_REQUIRED_FOR_TRANSPORT_ESCRT                                         | 26         | Up        | 0.301245108        | 0.589881117        |
| 2415 | LEIN_LOCALIZED_TO_DISTAL_AND_PROXIMAL_DENDRITES                                                         | 14         | Down      | 0.301739934        | 0.590502963        |
| 2416 | PASTURAL_RIZ1_TARGETS_DN                                                                                | 2          | Down      | 0.301812625        | 0.590502963        |
| 2417 | YAO_TEMPORAL_RESPONSE_TO_PROGESTERONE_CLUSTER_9                                                         | 67         | Up        | 0.302318008        | 0.59106826         |
| 2418 | GREGORY_SYNTHETIC_LETHAL_WITH_IMATINIB                                                                  | 118        | Up        | 0.302351743        | 0.59106826         |
| 2419 | PID_NFAT_3PATHWAY                                                                                       | 54         | Up        | 0.302938589        | 0.591944477        |
| 2420 | <b>WEBER_METHYLATED_LCP_IN_FIBROBLAST_DN</b>                                                            | <b>5</b>   | <b>Up</b> | <b>0.303112406</b> | <b>0.591944477</b> |
| 2421 | MURAKAMI_UV_RESPONSE_6HR_DN                                                                             | 13         | Up        | 3.03E-01           | 5.92E-01           |
| 2422 | HOFMANN_CELL_LYMPHOMA_UP                                                                                | 39         | Up        | 3.03E-01           | 5.92E-01           |
| 2423 | REACTOME_SYNTHESIS_OF_BILE_ACIDS_AND_BILE_SALTS_VIA_24_HYDROXYCHOLESTEROL                               | 6          | Up        | 0.303656994        | 0.592394424        |
| 2424 | TURASHVILI_BREAST_NORMAL_DUCTAL_VS_LOBULAR_DN                                                           | 6          | Up        | 0.303919871        | 0.592461659        |
| 2425 | SHEDDEN_LUNG_CANCER_GOOD_SURVIVAL_A4                                                                    | 158        | Up        | 0.303942235        | 0.592461659        |
| 2426 | ZHAN_V1_LATE_DIFFERENTIATION_GENES_DN                                                                   | 13         | Down      | 0.304110742        | 0.592545672        |
| 2427 | <b>DAVICIONI_MOLECULAR_ARMS_VS_ERMS_UP</b>                                                              | <b>304</b> | <b>Up</b> | <b>0.304253846</b> | <b>0.592580141</b> |
| 2428 | BIOCARTA_TH1TH2_PATHWAY                                                                                 | 7          | Up        | 0.304763289        | 0.593327787        |

|      | A                                                 | B   | C    | D           | E           |
|------|---------------------------------------------------|-----|------|-------------|-------------|
| 2429 | MIKKELSEN_DEDIFFERENTIATED_STATE_UP               | 7   | Down | 0.305021651 | 0.593453255 |
| 2430 | NIELSEN_SYNOVIAL_SARCOMA_UP                       | 15  | Up   | 0.305078932 | 0.593453255 |
| 2431 | ZHAN_MULTIPLE_MYELOMA_MF_UP                       | 36  | Up   | 0.306022228 | 0.595043221 |
| 2432 | PID_HIF1A_PATHWAY                                 | 18  | Down | 0.306937142 | 0.596402609 |
| 2433 | UDAYAKUMAR_MED1_TARGETS_DN                        | 222 | Up   | 0.306973787 | 0.596402609 |
| 2434 | KOYAMA_SEMA3B_TARGETS_DN                          | 360 | Up   | 0.307193234 | 0.596583654 |
| 2435 | MEISSNER_NPC_HCP_WITH_H3_UNMETHYLATED             | 390 | Up   | 0.307837915 | 0.597590036 |
| 2436 | DELACROIX_RAR_TARGETS_DN                          | 18  | Down | 0.308124172 | 0.597900087 |
| 2437 | FRASOR_RESPONSE_TO ESTRADIOL_DN                   | 66  | Up   | 0.308845503 | 0.599053777 |
| 2438 | BIOCARTA_PYK2_PATHWAY                             | 28  | Up   | 0.309163622 | 0.599424748 |
| 2439 | PATTERSON_DOCETAXEL_RESISTANCE                    | 25  | Up   | 0.309406081 | 0.599648784 |
| 2440 | REACTOME_DESTABILIZATION_OF_MRNA_BY_KS<br>RP      | 17  | Down | 0.309647494 | 0.599740966 |
| 2441 | ZEMBUTSU_SENSITIVITY_TO METHOTREXATE              | 13  | Down | 0.309707504 | 0.599740966 |
| 2442 | SHIPP_DLBCL_CURED_VS_FATAL_DN                     | 39  | Up   | 0.310359999 | 0.600758294 |
| 2443 | BEGUM_TARGETS_OF_PAX3_FOXO1_FUSION_UP             | 48  | Up   | 0.3105938   | 0.600906645 |
| 2444 | KEGG_SNARE_INTERACTIONS_IN_VESICULAR_TRANSPORT    | 35  | Down | 0.310690991 | 0.600906645 |
| 2445 | BENPORATH_MYC_TARGETS_WITH_EBOX                   | 204 | Up   | 0.310925567 | 0.601114281 |
| 2446 | SHEDDEN_LUNG_CANCER_GOOD_SURVIVAL_A5              | 66  | Down | 0.311357883 | 0.601703884 |
| 2447 | MOREAUX_MULTIPLE_MYELOMA_BY_TACI_DN               | 170 | Down | 0.312203971 | 0.602874609 |
| 2448 | RIZKI_TUMOR_INVASIVENESS_3D_UP                    | 165 | Up   | 0.312218872 | 0.602874609 |
| 2449 | PID_IL4_2PATHWAY                                  | 42  | Up   | 0.312440243 | 0.603026758 |
| 2450 | NICK_RESPONSE_TO_PROC_TREATMENT_DN                | 26  | Up   | 0.312598018 | 0.603026758 |
| 2451 | MOOTHA_FFA_OXYDATION                              | 21  | Up   | 0.312680541 | 0.603026758 |
| 2452 | SCHAEFFER_PROSTATE_DEVELOPMENT_AND_CANCER_BOX4_UP | 9   | Down | 0.312918885 | 0.603103953 |
| 2453 | LIN_NPAS4_TARGETS_UP                              | 153 | Up   | 0.312975851 | 0.603103953 |
| 2454 | ZHOU_CELL_CYCLE_GENES_IN_IR_RESPONSE_6HR          | 83  | Down | 0.313330664 | 0.603541536 |

|      | A                                                       | B         | C         | D                  | E                  |
|------|---------------------------------------------------------|-----------|-----------|--------------------|--------------------|
| 2455 | DURCHDEWALD_SKIN_CARCIANOGENESIS_DN                     | 233       | Up        | 0.314337891        | 0.605234937        |
| 2456 | MARTINEZ_TP53_TARGETS_DN                                | 484       | Up        | 0.31453048         | 0.605359071        |
| 2457 | CROONQUIST_IL6_DEPRIVATION_UP                           | 13        | Up        | 0.315038816        | 0.605994567        |
| 2458 | SCHLOSSER_SERUM_RESPONSE_UP                             | 112       | Down      | 0.315340277        | 0.605994567        |
| 2459 | TSENG_IRS1_TARGETS_DN                                   | 112       | Up        | 0.315363346        | 0.605994567        |
| 2460 | OUYANG_PROSTATE_CANCER_PROGRESSION_D<br>N               | 20        | Up        | 0.31537368         | 0.605994567        |
| 2461 | <b>MYLLYKANGAS_AMPLIFICATION_HOT_SPOT_8</b>             | <b>10</b> | <b>Up</b> | <b>0.315648417</b> | <b>0.606275923</b> |
| 2462 | SCHAEFFER_PROSTATE_DEVELOPMENT_AND_CA<br>NCER_BOX3      | 5         | Down      | 3.16E-01           | 6.07E-01           |
| 2463 | WALLACE_PROSTATE_CANCER_DN                              | 6         | Up        | 3.16E-01           | 6.07E-01           |
| 2464 | RAMALHO_STEMNESS_DN                                     | 49        | Up        | 0.316401582        | 0.606805743        |
| 2465 | BIOCARTA_SODD_PATHWAY                                   | 7         | Up        | 0.316437958        | 0.606805743        |
| 2466 | BILANGES_SERUM_RESPONSE_TRANSLATION                     | 32        | Down      | 0.316768005        | 0.607024387        |
| 2467 | REACTOME_SCF_BETA_TRCP_MEDIATED_DEGRA<br>DATION_OF_EMI1 | 48        | Down      | 0.316907859        | 0.607024387        |
| 2468 | <b>NAM_FXYD5_TARGETS_DN</b>                             | <b>18</b> | <b>Up</b> | <b>0.316937389</b> | <b>0.607024387</b> |
| 2469 | MAGRANGEAS_MULTIPLE_MYELOMA_IGLL_VS_I<br>GLK_DN         | 20        | Down      | 0.318301719        | 0.60927942         |
| 2470 | BROWNE_HCMV_INFECTION_6HR_UP                            | 50        | Down      | 0.318372675        | 0.60927942         |
| 2471 | GALE_APL_WITH_FLT3_MUTATED_UP                           | 55        | Up        | 0.318695003        | 0.609649348        |
| 2472 | NIELSEN_GIST_VS_SYNOVIAL_SARCOMA_DN                     | 13        | Up        | 0.318970859        | 0.609706116        |
| 2473 | REACTOME_SIGNALING_BY_WNT                               | 62        | Down      | 0.318982755        | 0.609706116        |
| 2474 | LABBE_TGFB1_TARGETS_DN                                  | 69        | Up        | 0.319386903        | 0.610130085        |
| 2475 | REACTOME_EFFECTS_OF_PIP2_HYDROLYSIS                     | 18        | Down      | 0.319462821        | 0.610130085        |
| 2476 | WAKABAYASHI_ADIPOGENESIS_PPARG_BOUND_<br>8D             | 579       | Up        | 0.320002391        | 0.610913655        |
| 2477 | GAZDA_DIAMOND_BLACKFAN_ANEMIA_ERYTHR<br>OID_UP          | 25        | Down      | 0.32070807         | 0.612013583        |
| 2478 | SANSOM_APC_TARGETS_REQUIRE_MYC                          | 198       | Up        | 0.320924854        | 0.61218003         |
| 2479 | NATSUME_RESPONSE_TO_INTERFERON_BETA_D<br>N              | 46        | Up        | 0.321292164        | 0.612633363        |

|      | A                                            | B        | C         | D                  | E                  |
|------|----------------------------------------------|----------|-----------|--------------------|--------------------|
| 2480 | JOSEPH_RESPONSE_TO_SODIUM_BUTYRATE_DN        | 50       | Up        | 0.321535589        | 0.612850204        |
| 2481 | STEIN_ESR1_TARGETS                           | 82       | Up        | 0.32182443         | 0.613153399        |
| 2482 | SHEPARD_CRUSH_AND_BURN_MUTANT_UP             | 174      | Up        | 0.322522615        | 0.614235935        |
| 2483 | PASTURAL_RIZ1_TARGETS_UP                     | 7        | Up        | 0.322818386        | 0.614551521        |
| 2484 | RAFFEL_VEGFA_TARGETS_DN                      | 2        | Up        | 0.32298836         | 0.614627467        |
| 2485 | PID_DNA_PK_PATHWAY                           | 15       | Down      | 0.323655473        | 0.615648998        |
| 2486 | PID_ALK1_PATHWAY                             | 22       | Up        | 0.324317257        | 0.616659573        |
| 2487 | KANG_CISPLATIN_RESISTANCE_DN                 | 8        | Up        | 0.324716522        | 0.617051466        |
| 2488 | REACTOME_METABOLISM_OF_PROTEINS              | 390      | Down      | 0.324784549        | 0.617051466        |
| 2489 | VERRECCHIA_RESPONSE_TO_TGFB1_C2              | 22       | Down      | 0.324939837        | 0.617098364        |
| 2490 | PID_P38_ALPHA_BETA_PATHWAY                   | 29       | Down      | 0.325275847        | 0.617485212        |
| 2491 | REACTOME_REGULATION_OF_KIT_SIGNALING         | 16       | Up        | 0.325490557        | 0.617485212        |
| 2492 | ZEMBUTSU_SENSITIVITY_TO_CISPLATIN            | 13       | Up        | 0.325558741        | 0.617485212        |
| 2493 | HASLINGER_B_CLL_WITH_MUTATED_VH_GENES        | 13       | Up        | 0.325666275        | 0.617485212        |
| 2494 | FINETTI_BREAST_CANCERS_KINOME_BLUE           | 21       | Up        | 0.32582943         | 0.617504303        |
| 2495 | FOURNIER_ACINAR_DEVELOPMENT_LATE_2           | 274      | Up        | 0.325937721        | 0.617504303        |
| 2496 | WAMUNYOKOLI_OVARIAN_CANCER_LMP_UP            | 244      | Up        | 0.326784461        | 0.618860352        |
| 2497 | PID_S1P_S1P2_PATHWAY                         | 23       | Up        | 0.326953279        | 0.618931989        |
| 2498 | FUNG_IL2_TARGETS_WITH_STAT5_BINDING_SITES_T1 | 2        | Up        | 0.327342806        | 0.619223088        |
| 2499 | MEINHOLD_OVARIAN_CANCER_LOW_GRADE_DN         | 20       | Down      | 0.327472714        | 0.619223088        |
| 2500 | LANDEMAINE_LUNG_METASTASIS                   | 20       | Up        | 0.327500211        | 0.619223088        |
| 2501 | GOZGIT_ESR1_TARGETS_UP                       | 116      | Up        | 0.327950777        | 0.619826968        |
| 2502 | <b>YAGUE_PRETUMOR_DRUG_RESISTANCE_UP</b>     | <b>6</b> | <b>Up</b> | <b>0.328473196</b> | <b>0.620566114</b> |
| 2503 | VALK_AML_CLUSTER_15                          | 22       | Up        | 3.29E-01           | 6.21E-01           |
| 2504 | DING_LUNG_CANCER_MUTATED_RECURRENTLY         | 6        | Down      | 3.29E-01           | 6.21E-01           |
| 2505 | BIOCARTA_CBL_PATHWAY                         | 12       | Up        | 0.329195581        | 0.621185751        |



|      | A                                                                         | B   | C    | D           | E           |
|------|---------------------------------------------------------------------------|-----|------|-------------|-------------|
| 2506 | REACTOME_PROLONGED_ERK_ACTIVATION_EVENTS                                  | 17  | Down | 0.329759529 | 0.621373991 |
| 2507 | ST_P38_MAPK_PATHWAY                                                       | 37  | Up   | 0.32976718  | 0.621373991 |
| 2508 | BIOCARTA_AKAPCENTROSOME_PATHWAY                                           | 14  | Down | 0.32980753  | 0.621373991 |
| 2509 | POMEROY_MEDULLOBLASTOMA_PROGNOSIS_DN                                      | 42  | Down | 0.329821369 | 0.621373991 |
| 2510 | PID_SYNDECAN_4_PATHWAY                                                    | 27  | Up   | 0.330130443 | 0.621643002 |
| 2511 | HEIDENBLAD_AMPLICON_12P11_12_DN                                           | 27  | Down | 0.330227288 | 0.621643002 |
| 2512 | SHEN_SMARCA2_TARGETS_DN                                                   | 178 | Down | 0.330481259 | 0.621835676 |
| 2513 | NIKOLSKY_BREAST_CANCER_12Q24_AMPLICON                                     | 13  | Down | 0.33059285  | 0.621835676 |
| 2514 | REACTOME_TIGHT_JUNCTION_INTERACTIONS                                      | 20  | Down | 0.331484187 | 0.623264139 |
| 2515 | KRIEG_HYPOXIA_NOT_VIA_KDM3A                                               | 698 | Up   | 0.332379839 | 0.624549555 |
| 2516 | KANG_CISPLATIN_RESISTANCE_UP                                              | 18  | Up   | 0.332493805 | 0.624549555 |
| 2517 | SIG_REGULATION_OF_THE_ACTIN_CYTOSKELETON_BY_RHO_GTPASES                   | 31  | Up   | 0.332584401 | 0.624549555 |
| 2518 | BOYALTY_LIVER_CANCER_SUBCLASS_G3_DN                                       | 37  | Down | 0.332696557 | 0.624549555 |
| 2519 | PENG_RAPAMYCIN_RESPONSE_UP                                                | 160 | Down | 0.33304098  | 0.624871763 |
| 2520 | REACTOME_SIGNALING_BY_ROBO_RECEPTOR                                       | 29  | Down | 0.333132692 | 0.624871763 |
| 2521 | KYNG_ENVIRONMENTAL_STRESS_RESPONSE_UP                                     | 50  | Up   | 0.333696792 | 0.625219563 |
| 2522 | WAGSCHAL_EHMT2_TARGETS_UP                                                 | 5   | Up   | 0.333863437 | 0.625219563 |
| 2523 | BASSO_CD40_SIGNALING_DN                                                   | 49  | Up   | 0.333907011 | 0.625219563 |
| 2524 | WANG_TARGETS_OF_MLL_CBP_FUSION_UP                                         | 31  | Up   | 0.333917032 | 0.625219563 |
| 2525 | FERREIRA_EWINGS_SARCOMA_UNSTABLE_VS_STABLE_DN                             | 80  | Up   | 0.33397972  | 0.625219563 |
| 2526 | BIOCARTA_HSP27_PATHWAY                                                    | 12  | Up   | 0.33460443  | 0.62594832  |
| 2527 | CHIANG_LIVER_CANCER_SUBCLASS_CTNNB1_UP                                    | 115 | Up   | 0.334633959 | 0.62594832  |
| 2528 | LINDGREN_BLADDER_CANCER_CLUSTER_3_DN                                      | 203 | Up   | 0.335078194 | 0.626531248 |
| 2529 | REACTOME_SYNTHESIS_AND_INTERCONVERSION_OF_NUCLEOTIDE_DI_AND_TRIPHOSPHATES | 18  | Up   | 0.335217819 | 0.62654438  |

|      | A                                                                     | B          | C         | D                  | E                  |
|------|-----------------------------------------------------------------------|------------|-----------|--------------------|--------------------|
| 2530 | FONTAINE_THYROID_TUMOR_UNCERTAIN_MALIGNANCY_UP                        | 31         | Up        | 0.337694326        | 0.630497044        |
| 2531 | GRAESSMANN_APOPTOSIS_BY_SERUM_DEPRIVATION_UP                          | 441        | Up        | 0.337734917        | 0.630497044        |
| 2532 | NOJIMA_SFRP2_TARGETS_DN                                               | 21         | Up        | 0.33775447         | 0.630497044        |
| 2533 | REACTOME_ABCA_TRANSPORTERS_IN_LIPID_HOMEOSTASIS                       | 9          | Down      | 0.338017425        | 0.630497044        |
| 2534 | MULLIGHAN_NPM1_SIGNATURE_3_UP                                         | 278        | Up        | 0.33806897         | 0.630497044        |
| 2535 | RODRIGUES_THYROID_CARCINOMA_UP                                        | 15         | Up        | 0.338133229        | 0.630497044        |
| 2536 | KAAB_FAILED_HEART_VENTRICLE_DN                                        | 33         | Up        | 0.338487094        | 0.630907897        |
| 2537 | CHEOK_RESPONSE_TO_MERCAPTOPYRINE_AND_LD_MTX_UP                        | 10         | Up        | 0.339106844        | 0.631699538        |
| 2538 | REACTOME_THE_ROLE_OF_NEF_IN_HIV1_REPLICATION_AND_DISEASE_PATHOGENESIS | 24         | Up        | 0.339277217        | 0.631699538        |
| 2539 | IWANAGA_CARCINOGENESIS_BY_KRAS_PTEN_UP                                | 145        | Up        | 0.339312895        | 0.631699538        |
| 2540 | PID_ERBB1_RECEPTOR_PROXIMAL_PATHWAY                                   | 34         | Down      | 0.339725631        | 0.632130587        |
| 2541 | HELLER_SILENCED_BY_METHYLATION_UP                                     | 188        | Up        | 0.339811998        | 0.632130587        |
| 2542 | CHANDRAN_METASTASIS_TOP50_DN                                          | 44         | Up        | 0.340094123        | 0.632162386        |
| 2543 | <b>CHICAS_RB1_TARGETS_GROWING</b>                                     | <b>218</b> | <b>Up</b> | <b>0.340096674</b> | <b>0.632162386</b> |
| 2544 | KANG_FLUOROURACIL_RESISTANCE_UP                                       | 19         | Up        | 3.40E-01           | 6.32E-01           |
| 2545 | FONTAINE_THYROID_TUMOR_UNCERTAIN_MALIGNANCY_DN                        | 18         | Up        | 3.41E-01           | 6.33E-01           |
| 2546 | BIOCARTA_PTEN_PATHWAY                                                 | 17         | Up        | 0.341285332        | 0.633503254        |
| 2547 | BIOCARTA_CALCINEURIN_PATHWAY                                          | 18         | Down      | 0.341354346        | 0.633503254        |
| 2548 | WIERENGA_PML_INTERACTOME                                              | 38         | Up        | 0.341640268        | 0.633718677        |
| 2549 | SAFFORD_T_LYMPHOCYTE_ANERGY                                           | 66         | Up        | 0.341738665        | 0.633718677        |
| 2550 | REACTOME_PKA_MEDIATED_PHOSPHORYLATION_OF_CREB                         | 15         | Up        | 0.342082184        | 0.634106834        |
| 2551 | GROSS_ELK3_TARGETS_UP                                                 | 27         | Up        | 0.343102969        | 0.635600427        |
| 2552 | VANTVEER_BREAST_CANCER_BRCA1_DN                                       | 38         | Up        | 0.343156971        | 0.635600427        |
| 2553 | WALLACE_PROSTATE_CANCER_UP                                            | 20         | Up        | 0.343611861        | 0.636193591        |

|      | A                                                  | B   | C    | D           | E           |
|------|----------------------------------------------------|-----|------|-------------|-------------|
| 2554 | BIOCARTA_PAR1_PATHWAY                              | 33  | Down | 0.344027323 | 0.636713318 |
| 2555 | NOUZOVA_TRETINOIN_AND_H4_ACETYLATION               | 135 | Down | 0.344501165 | 0.637340643 |
| 2556 | LUI_THYROID_CANCER_CLUSTER_2                       | 40  | Down | 0.344666803 | 0.637397512 |
| 2557 | CAFFAREL_RESPONSE_TO_THC_24HR_3_DN                 | 12  | Down | 0.344857686 | 0.637501005 |
| 2558 | BIOCARTA_PLCE_PATHWAY                              | 9   | Up   | 0.345320995 | 0.638107822 |
| 2559 | HOEGERKORP_CD44_TARGETS_TEMPORAL_DN                | 19  | Down | 0.345589221 | 0.638353819 |
| 2560 | ASTON_MAJOR_DEPRESSIVE_DISORDER_UP                 | 42  | Up   | 0.346112835 | 0.638886015 |
| 2561 | KORKOLA_SEMINOMA_DN                                | 6   | Down | 0.346277361 | 0.638886015 |
| 2562 | MIKKELSEN_IPS_LCP_WITH_H3K4ME3_AND_H3K27ME3        | 2   | Down | 0.346282981 | 0.638886015 |
| 2563 | REACTOME_NITRIC_OXIDE_STIMULATES_GUANYLATE_CYCLASE | 19  | Up   | 0.346601409 | 0.639167263 |
| 2564 | KEGG_PYRIMIDINE_METABOLISM                         | 85  | Up   | 0.346811816 | 0.639167263 |
| 2565 | RADAEVA_RESPONSE_TO_IFNA1_UP                       | 41  | Up   | 0.346867574 | 0.639167263 |
| 2566 | STARK_BRAIN_22Q11_DELETION                         | 12  | Up   | 0.347241635 | 0.639167263 |
| 2567 | REACTOME_SPHINGOLIPID_DE_NOVO_BIOSYNTHESIS         | 26  | Up   | 0.347565042 | 0.639167263 |
| 2568 | PID_INTEGRIN4_PATHWAY                              | 11  | Down | 0.347625232 | 0.639167263 |
| 2569 | REACTOME_TERMINATION_OF_O_GLYCAN_BIOSYNTHESIS      | 9   | Up   | 0.34775024  | 0.639167263 |
| 2570 | NIKOLSKY_BREAST_CANCER_8Q23_Q24_AMPLICON           | 124 | Down | 0.347777708 | 0.639167263 |
| 2571 | MCBRYAN_PUBERTAL_BREAST_4_5WK_UP                   | 215 | Up   | 0.347830295 | 0.639167263 |
| 2572 | SENGUPTA_NASOPHARYNGEAL_CARCINOMA_WITH_LMP1_UP     | 330 | Up   | 0.347938405 | 0.639167263 |
| 2573 | TURJANSKI_MAPK8_AND_MAPK9_TARGETS                  | 8   | Up   | 0.348003204 | 0.639167263 |
| 2574 | MA_PITUITARY_FETAL_VS_ADULT_DN                     | 16  | Down | 0.348058702 | 0.639167263 |
| 2575 | HOFMANN_MYELODYSPLASTIC_SYNDROME_LOW_RISK_UP       | 13  | Down | 0.348649947 | 0.639860125 |
| 2576 | REACTOME_INTEGRATION_OF_PROVIRUS                   | 8   | Down | 0.348775356 | 0.639860125 |
| 2577 | HEDENFALK_BREAST_CANCER_BRACX_DN                   | 20  | Down | 0.348842261 | 0.639860125 |

|      | A                                                                               | B         | C           | D                  | E                  |
|------|---------------------------------------------------------------------------------|-----------|-------------|--------------------|--------------------|
| 2578 | NIKOLSKY_BREAST_CANCER_12Q13_Q21_AMPLICON                                       | 36        | Up          | 0.349082946        | 0.640053131        |
| 2579 | HOWLIN_CITED1_TARGETS_2_UP                                                      | 12        | Down        | 0.349303944        | 0.640209905        |
| 2580 | LOPES_METHYLATED_IN_COLON_CANCER_DN                                             | 20        | Down        | 0.349447235        | 0.64022419         |
| 2581 | BOSCO_INTERFERON_INDUCED_ANTIVIRAL_MODULE                                       | 48        | Up          | 0.350105718        | 0.641128118        |
| 2582 | GOLDRATH_ANTIGEN_RESPONSE                                                       | 287       | Up          | 0.350535106        | 0.641128118        |
| 2583 | SCHURINGA_STAT5A_TARGETS_DN                                                     | 9         | Up          | 0.35056892         | 0.641128118        |
| 2584 | <b>PID_IL8_CXCR2_PATHWAY</b>                                                    | <b>29</b> | <b>Up</b>   | <b>0.350579241</b> | <b>0.641128118</b> |
| 2585 | MIKKELSEN_ES_LCP_WITH_H3K27ME3                                                  | 4         | Down        | 3.51E-01           | 6.41E-01           |
| 2586 | HOLLEMAN_PREDNISOLONE_RESISTANCE_ALL_DN                                         | 7         | Up          | 3.51E-01           | 6.42E-01           |
| 2587 | SIG_IL4RECEPTOR_IN_B_LYPHOCYTES                                                 | 27        | Up          | 0.351194986        | 0.641684573        |
| 2588 | LENAOUR_DENDRITIC_CELL_MATURATION_DN                                            | 86        | Up          | 0.351694843        | 0.642349492        |
| 2589 | REACTOME_REGULATION_OF_IFNA_SIGNALING                                           | 11        | Up          | 0.351863989        | 0.642410104        |
| 2590 | CHANG_POU5F1_TARGETS_UP                                                         | 11        | Up          | 0.352211505        | 0.6427962          |
| 2591 | <b>MUNSHI_MULTIPLE_MYELOMA_DN</b>                                               | <b>10</b> | <b>Down</b> | <b>0.352382889</b> | <b>0.642860676</b> |
| 2592 | BIOCARTA_NFAT_PATHWAY                                                           | 41        | Up          | 0.353489386        | 0.644430839        |
| 2593 | REACTOME_FANCONI_ANEMIA_PATHWAY                                                 | 20        | Up          | 0.353545809        | 0.644430839        |
| 2594 | DUTTA_APOPTOSIS_VIA_NFKB                                                        | 27        | Up          | 0.353652733        | 0.644430839        |
| 2595 | LEE_NAIVE_T_LYMPHOCYTE                                                          | 12        | Up          | 0.353840484        | 0.644500953        |
| 2596 | WOO_LIVER_CANCER_RECURRENCE_UP                                                  | 92        | Up          | 0.353964015        | 0.644500953        |
| 2597 | PID_ERBB4_PATHWAY                                                               | 32        | Down        | 0.354518233        | 0.645261422        |
| 2598 | MATZUK_POST-IMPLANTATION_AND_POST-PARTUM                                        | 11        | Down        | 0.354733795        | 0.645384062        |
| 2599 | GUTIERREZ_WALDENSTROEMS_MACROGLOBULINEMIA_2                                     | 9         | Down        | 0.354931934        | 0.645384062        |
| 2600 | REACTOME_SYNTHESIS_OF_PIPS_AT_THE_LATE_ENDOSOME_MEMBRANE                        | 10        | Up          | 0.354995381        | 0.645384062        |
| 2601 | REACTOME_IRAK2_MEDIATED_ACTIVATION_OF_TAK1_COMPLEX_UPON_TLR7_8_OR_9_STIMULATION | 8         | Down        | 0.355796703        | 0.64655116         |

|      | A                                                          | B         | C           | D                  | E                 |
|------|------------------------------------------------------------|-----------|-------------|--------------------|-------------------|
| 2602 | REACTOME_SIGNALING_BY_FGFR_IN_DISEASE                      | 107       | Down        | 0.356022778        | 0.64655116        |
| 2603 | REACTOME_APOPTOSIS_INDUCED_DNA_FRAGME<br>NTATION           | 9         | Down        | 0.356047856        | 0.64655116        |
| 2604 | GARGALOVIC_RESPONSE_TO_OXIDIZED_PHOSPH<br>OLIPIDS_GREEN_DN | 23        | Down        | 0.356365013        | 0.64687848        |
| 2605 | LEE_AGING_MUSCLE_UP                                        | 35        | Up          | 0.35698702         | 0.647758706       |
| 2606 | ZAMORA_NOS2_TARGETS_DN                                     | 82        | Up          | 0.357403289        | 0.648265083       |
| 2607 | PUJANA_ATM_PCC_NETWORK                                     | 1212      | Down        | 0.358123249        | 0.649321701       |
| 2608 | SA_CASPASE_CASCADE                                         | 15        | Up          | 0.358505149        | 0.649764486       |
| 2609 | DODD_NASOPHARYNGEAL_CARCI<br>NOMA_UP                       | 1216      | Up          | 0.358642493        | 0.649764486       |
| 2610 | REACTOME_BASE_EXCISION_REPAIR                              | 18        | Down        | 0.359268538        | 0.650649231       |
| 2611 | YANG_BREAST_CANCER_ESR1_UP                                 | 30        | Up          | 0.359515351        | 0.650846756       |
| 2612 | PID_LYMPH_ANGIOGENESIS_PATHWAY                             | 24        | Up          | 0.360353221        | 0.652113739       |
| 2613 | REACTOME_TRYPTOPHAN_CATABOLISM                             | 6         | Down        | 0.360608018        | 0.652324994       |
| 2614 | VARELA_ZMPSTE24_TARGETS_UP                                 | 37        | Up          | 0.361132167        | 0.652844417       |
| 2615 | REACTOME_KERATAN_SULFATE_KERATIN_META<br>BOLISM            | 23        | Up          | 0.361221107        | 0.652844417       |
| 2616 | KIM_MYCN_AMPLIFICATION_TARGETS_UP                          | 76        | Up          | 0.361309661        | 0.652844417       |
| 2617 | REACTOME_MEIOTIC_SYNAPSIS                                  | 42        | Down        | 0.361620108        | 0.653155584       |
| 2618 | MALONEY_RESPONSE_TO_17AAG_UP                               | 38        | Up          | 0.361909217        | 0.653427989       |
| 2619 | PID_ERA_GENOMIC_PATHWAY                                    | 52        | Down        | 0.362111755        | 0.653543942       |
| 2620 | SANSOM_APC_TARGETS                                         | 176       | Up          | 0.362701976        | 0.654359235       |
| 2621 | HOLLEMAN_VINCRISTINE_RESISTANCE_B_ALL_D<br>N               | 15        | Down        | 0.364278875        | 0.656945177       |
| 2622 | COLINA_TARGETS_OF_4EBP1_AND_4EBP2                          | 304       | Up          | 0.364413398        | 0.656945177       |
| 2623 | MIKKELSEN_ES_HCP_WITH_H3K27ME3                             | 13        | Up          | 0.364727836        | 0.657261261       |
| 2624 | KEGG_ENDOCYTOSIS                                           | 170       | Up          | 0.364944578        | 0.65730223        |
| 2625 | <b>NIELSEN_GIST_VS_SYNOVIAL_SARCOMA_UP</b>                 | <b>15</b> | <b>Down</b> | <b>0.365134462</b> | <b>0.65730223</b> |
| 2626 | WAKABAYASHI_ADIPOGENESIS_PPARG_BOUND_<br>36HR              | 29        | Up          | 3.65E-01           | 6.57E-01          |
| 2627 | SESTO_RESPONSE_TO_UV_C2                                    | 51        | Up          | 3.65E-01           | 6.57E-01          |
| 2628 | VALK_AML_CLUSTER_5                                         | 20        | Up          | 0.365588347        | 0.657319978       |

|      | A                                               | B   | C    | D           | E           |
|------|-------------------------------------------------|-----|------|-------------|-------------|
| 2629 | MIKKELSEN_MEF_LCP_WITH_H3K27ME3                 | 24  | Down | 0.365595111 | 0.657319978 |
| 2630 | DE_YY1_TARGETS_UP                               | 11  | Down | 0.365755689 | 0.65735855  |
| 2631 | PID_S1P_META_PATHWAY                            | 19  | Up   | 0.366337422 | 0.658104213 |
| 2632 | CHIBA_RESPONSE_TO_TSA_DN                        | 20  | Up   | 0.366449139 | 0.658104213 |
| 2633 | KAMIKUBO_MYELOID_CEBPA_NETWORK                  | 15  | Up   | 0.366753554 | 0.658270267 |
| 2634 | JIANG_TIP30_TARGETS_UP                          | 43  | Up   | 0.366820236 | 0.658270267 |
| 2635 | VALK_AML_CLUSTER_8                              | 21  | Up   | 0.367204605 | 0.658565571 |
| 2636 | RIGGINS_TAMOXIFEN_RESISTANCE_UP                 | 53  | Up   | 0.367263551 | 0.658565571 |
| 2637 | REACTOME_BINDING_AND_ENTRY_OF_HIV_VIRION        | 3   | Down | 0.368130784 | 0.659870241 |
| 2638 | WAKABAYASHI_ADIPOGENESIS_PPARG_RXRA_BOUNDS_36HR | 130 | Up   | 0.368338511 | 0.659992213 |
| 2639 | FUJIWARA_PARK2_HEPATOCYTE_PROLIFERATION_DN      | 5   | Up   | 0.368694688 | 0.660379985 |
| 2640 | TURJANSKI_MAPK7_TARGETS                         | 8   | Up   | 0.369132512 | 0.660913648 |
| 2641 | ZHAN_MULTIPLE_MYELOMA_CD2_UP                    | 33  | Down | 0.369485241 | 0.661259474 |
| 2642 | NAKAMURA_METASTASIS                             | 40  | Up   | 0.369677019 | 0.661259474 |
| 2643 | CASTELLANO_HRAS_TARGETS_DN                      | 6   | Up   | 0.369745509 | 0.661259474 |
| 2644 | REACTOME_STEROID_HORMONES                       | 13  | Up   | 0.369990103 | 0.661446553 |
| 2645 | MIKKELSEN_ES_LCP_WITH_H3K4ME3                   | 84  | Up   | 0.370842043 | 0.6625164   |
| 2646 | DAVICIONI_PAX_FOXO1_SIGNATURE_IN_ARMS_DN        | 18  | Up   | 0.370973827 | 0.6625164   |
| 2647 | ST_T_CELL_SIGNAL_TRANSDUCTION                   | 34  | Down | 0.37104998  | 0.6625164   |
| 2648 | BRUINS_UVC_RESPONSE_VIA_TP53_GROUP_D            | 201 | Up   | 0.371264068 | 0.6625164   |
| 2649 | REACTOME_DNA_STRAND_ELONGATION                  | 30  | Up   | 0.371289614 | 0.6625164   |
| 2650 | SMID_BREAST_CANCER_RELAPSE_IN_PLEURA_UP         | 5   | Down | 0.372114629 | 0.663737871 |
| 2651 | SEKI_INFLAMMATORY_RESPONSE_LPS_DN               | 17  | Down | 0.372729474 | 0.664404144 |
| 2652 | REACTOME_SIGNALLING_TO_P38_VIA_RIT_AND_RIN      | 13  | Down | 0.372769394 | 0.664404144 |
| 2653 | YAMAZAKI_TCEB3_TARGETS_DN                       | 197 | Up   | 0.372970337 | 0.664511629 |

|      | A                                                                           | B          | C           | D                  | E                  |
|------|-----------------------------------------------------------------------------|------------|-------------|--------------------|--------------------|
| 2654 | GUTIERREZ_WALDENSTROEMS_MACROGLOBULI<br>NEMIA_1_DN                          | 5          | Down        | 0.373575455        | 0.665338871        |
| 2655 | BOYALT_LIVER_CANCER_SUBCLASS_G1_DN                                          | 39         | Up          | 0.373755385        | 0.665408513        |
| 2656 | MATTIOLI_MGUS_VS_MULTIPLE_MYELOMA                                           | 14         | Down        | 0.374839335        | 0.666642577        |
| 2657 | BENNETT_SYSTEMIC_LUPUS_ERYTHEMATOSUS                                        | 17         | Up          | 0.375062043        | 0.666642577        |
| 2658 | REACTOME_REGULATION_OF_INSULIN_SECRETI<br>ON_BY_GLUCAGON_LIKE_PEPTIDE1      | 34         | Up          | 0.375113957        | 0.666642577        |
| 2659 | HUMMERICH_BENIGN_SKIN_TUMOR_UP                                              | 9          | Up          | 0.375150984        | 0.666642577        |
| 2660 | REACTOME_RNA_POL_III_CHAIN_ELONGATION                                       | 16         | Down        | 0.375153992        | 0.666642577        |
| 2661 | NAKAYAMA_FRA2_TARGETS                                                       | 37         | Up          | 0.375334849        | 0.666713219        |
| 2662 | PID_LPA4_PATHWAY                                                            | 14         | Down        | 0.375840004        | 0.667359647        |
| 2663 | SCHUHMACHER_MYC_TARGETS_DN                                                  | 7          | Up          | 0.376386072        | 0.668078208        |
| 2664 | FIGUEROA_AML_METHYLATION_CLUSTER_5_DN                                       | 27         | Up          | 0.376585823        | 0.668181754        |
| 2665 | PID_CD8_TCR_DOWNSTREAM_PATHWAY                                              | 33         | Up          | 0.37677663         | 0.66826936         |
| 2666 | <b>REACTOME_SEMA4D_INDUCED_CELL_MIGRATIO<br/>N_AND_GROWTH_CONE_COLLAPSE</b> | <b>24</b>  | <b>Up</b>   | <b>0.377171177</b> | <b>0.668560454</b> |
| 2667 | SESTO_RESPONSE_TO_UV_C4                                                     | 18         | Up          | 3.77E-01           | 6.69E-01           |
| 2668 | REACTOME_PI_3K_CASCADE                                                      | 42         | Down        | 3.77E-01           | 6.69E-01           |
| 2669 | REACTOME_SYNTHESIS_SECRETION_AND_INACTI<br>VATION_OF_GIP                    | 7          | Up          | 0.37764402         | 0.668803597        |
| 2670 | WEI_MYCN_TARGETS_WITH_E_BOX                                                 | 753        | Up          | 0.377952654        | 0.668850613        |
| 2671 | ENGELMANN_CANCER_PROGENITORS_DN                                             | 52         | Down        | 0.378016996        | 0.668850613        |
| 2672 | LUI_TARGETS_OF_PAX8_PPARG_FUSION                                            | 33         | Up          | 0.378158496        | 0.668850613        |
| 2673 | <b>WANG_CLIM2_TARGETS_UP</b>                                                | <b>227</b> | <b>Down</b> | <b>0.378404175</b> | <b>0.668850613</b> |
| 2674 | KORKOLA_EMBRYONAL_CARCINOMA_DN                                              | 7          | Down        | 0.378525265        | 0.668850613        |
| 2675 | SABATES_COLORECTAL_ADENOMA_SIZE_UP                                          | 20         | Up          | 0.378558503        | 0.668850613        |
| 2676 | KYNG_RESPONSE_TO_H2O2                                                       | 62         | Up          | 0.378661458        | 0.668850613        |
| 2677 | PID_CMYB_PATHWAY                                                            | 63         | Down        | 0.379474026        | 0.670035416        |
| 2678 | WEBER_METHYLATED_LCP_IN_SPERM_DN                                            | 4          | Up          | 0.380019738        | 0.670538331        |
| 2679 | CHOI_ATL_ACUTE_STAGE                                                        | 3          | Up          | 0.380042678        | 0.670538331        |
| 2680 | YANG_MUC2_TARGETS_DUODENUM_6MO_UP                                           | 3          | Up          | 0.380317356        | 0.670772493        |

|      | A                                                           | B   | C    | D           | E           |
|------|-------------------------------------------------------------|-----|------|-------------|-------------|
| 2681 | BENPORATH_PROLIFERATION                                     | 143 | Down | 0.380849665 | 0.671021113 |
| 2682 | KEGG_LEUKOCYTE_TRANSENDOTHELIAL_MIGRATION                   | 90  | Up   | 0.380947118 | 0.671021113 |
| 2683 | WILSON_PROTEASES_AT_TUMOR_BONE_INTERF<br>ACE_DN             | 3   | Down | 0.381020897 | 0.671021113 |
| 2684 | REACTOME_SIGNALING_BY_HIPPO                                 | 20  | Up   | 0.38102638  | 0.671021113 |
| 2685 | REACTOME_CHROMOSOME_MAINTENANCE                             | 89  | Down | 0.382043442 | 0.672561574 |
| 2686 | ENK_UV_RESPONSE KERATINOCYTE_UP                             | 457 | Up   | 0.382560849 | 0.673221606 |
| 2687 | XU_AKT1_TARGETS_6HR                                         | 23  | Up   | 0.383039909 | 0.673813689 |
| 2688 | GARGALOVIC_RESPONSE_TO_OXIDIZED_PHOSPH<br>OLIPIDS_YELLOW_DN | 22  | Down | 0.383233408 | 0.673903183 |
| 2689 | DAZARD_UV_RESPONSE_CLUSTER_G1                               | 56  | Down | 0.383880509 | 0.674789958 |
| 2690 | NAKAJIMA_EOSINOPHIL                                         | 13  | Down | 0.3841437   | 0.674804505 |
| 2691 | BIOCARTA_GATA3_PATHWAY                                      | 11  | Up   | 0.384174417 | 0.674804505 |
| 2692 | KEGG_MAPK_SIGNALING_PATHWAY                                 | 221 | Up   | 0.384698211 | 0.675473448 |
| 2693 | KEGG_PROTEIN_EXPORT                                         | 23  | Up   | 0.385480307 | 0.67639597  |
| 2694 | PURBEY_TARGETS_OF_CTBP1_NOT_SATB1_DN                        | 337 | Down | 0.385605468 | 0.67639597  |
| 2695 | BIOCARTA_NDKDYNAMIN_PATHWAY                                 | 18  | Up   | 0.385653067 | 0.67639597  |
| 2696 | PETRETTO_LEFT_VENTRICLE_MASS_QTL_CIS_DN                     | 7   | Down | 0.386005102 | 0.676762191 |
| 2697 | BROWNE_HCMV_INFECTION_8HR_DN                                | 40  | Up   | 0.386405819 | 0.676961033 |
| 2698 | WHITFIELD_CELL_CYCLE_S                                      | 151 | Up   | 0.386452712 | 0.676961033 |
| 2699 | REACTOME_AMINE_LIGAND_BINDING_RECEPTOR<br>S                 | 12  | Down | 0.386548332 | 0.676961033 |
| 2700 | KRISHNAN_FURIN_TARGETS_UP                                   | 10  | Up   | 0.386705426 | 0.676985231 |
| 2701 | KEGG_SMALL_CELL_LUNG_CANCER                                 | 77  | Up   | 0.386914258 | 0.677099951 |
| 2702 | NAGY_TFTC_COMPONENTS_HUMAN                                  | 19  | Down | 0.387554641 | 0.677969523 |
| 2703 | WESTON_VEGFA_TARGETS                                        | 85  | Up   | 0.388249266 | 0.678803753 |
| 2704 | MANALO_HYPOXIA_DN                                           | 284 | Up   | 0.388318845 | 0.678803753 |
| 2705 | SCHAEFFER_PROSTATE_DEVELOPMENT_AND_CA<br>NCER_BOX6_DN       | 4   | Up   | 0.388821071 | 0.679430311 |



|      | A                                                        | B         | C           | D                  | E                  |
|------|----------------------------------------------------------|-----------|-------------|--------------------|--------------------|
| 2706 | REACTOME_ADENYLATE_CYCLASE_INHIBITORY_PATHWAY            | 12        | Down        | 0.389771894        | 0.680699527        |
| 2707 | <b>KEGG_ AMYOTROPHIC_ LATERAL_ SCLEROSIS_ ALS</b>        | <b>47</b> | <b>Down</b> | <b>0.389835539</b> | <b>0.680699527</b> |
| 2708 | KYNG_DNA_DAMAGE_BY_UV                                    | 49        | Up          | 3.90E-01           | 6.81E-01           |
| 2709 | KEGG_RIBOFLAVIN_METABOLISM                               | 13        | Up          | 3.90E-01           | 6.81E-01           |
| 2710 | STEINER_ERYTHROCYTE_MEMBRANE_GENES                       | 11        | Up          | 0.390658103        | 0.681380413        |
| 2711 | HOFFMAN_CLOCK_TARGETS_DN                                 | 3         | Down        | 0.390981834        | 0.68159137         |
| 2712 | KEGG_STARCH_AND_SUCROSE_METABOLISM                       | 21        | Down        | 0.391210822        | 0.68159137         |
| 2713 | SCHAEFFER_PROSTATE_DEVELOPMENT_AND_CANCER_BOX2_UP        | 6         | Up          | 0.391211808        | 0.68159137         |
| 2714 | <b>GHANDHI_DIRECT_IRRADIATION_DN</b>                     | <b>27</b> | <b>Down</b> | <b>0.391786129</b> | <b>0.682340384</b> |
| 2715 | MCGARVEY_SILENCED_BY_METHYLATION_IN_COLORECTAL_CANCER    | 25        | Up          | 0.392852954        | 0.683946282        |
| 2716 | HOSHIDA_LIVER_CANCER_LATE_RECURRENCE_UP                  | 47        | Up          | 0.393293612        | 0.684461258        |
| 2717 | BERTUCCI_INVASIVE_CARCINOMA_DUCTAL_VSLOBULAR_UP          | 22        | Up          | 0.39351134         | 0.684588026        |
| 2718 | LEE_LIVER_CANCER_MYC_DN                                  | 32        | Up          | 0.393768784        | 0.684695601        |
| 2719 | ACEVEDO_LIVER_CANCER_WITH_H3K9ME3_UP                     | 77        | Up          | 0.393935216        | 0.684695601        |
| 2720 | REACTOME_ AMYLOIDS                                       | 35        | Down        | 0.394007902        | 0.684695601        |
| 2721 | WIERENGA_STAT5A_TARGETS_DN                               | 155       | Up          | 0.394838798        | 0.685756898        |
| 2722 | LIU_CDX2_TARGETS_DN                                      | 3         | Down        | 0.394908893        | 0.685756898        |
| 2723 | CAIRO_LIVER_DEVELOPMENT_UP                               | 146       | Up          | 0.395063983        | 0.68577418         |
| 2724 | REACTOME_POTASSIUM_CHANNELS                              | 56        | Down        | 0.395327922        | 0.685980328        |
| 2725 | MARSHALL_VIRAL_INFECTION_RESPONSE_UP                     | 6         | Up          | 0.395758282        | 0.686474993        |
| 2726 | ST_TYPE_I_INTERFERON_PATHWAY                             | 7         | Up          | 0.396316202        | 0.687055356        |
| 2727 | REACTOME_ADHERENS_JUNCTIONS_INTERACTIONS                 | 21        | Down        | 0.396609672        | 0.687055356        |
| 2728 | REACTOME_INTERACTIONS_OF_VPR_WITH_HOST_CELLULAR_PROTEINS | 32        | Down        | 0.396678726        | 0.687055356        |
| 2729 | XU_GH1_AUTOCRINE_TARGETS_DN                              | 124       | Up          | 0.396696897        | 0.687055356        |

|      | A                                                                                | B         | C         | D                 | E                  |
|------|----------------------------------------------------------------------------------|-----------|-----------|-------------------|--------------------|
| 2730 | GAL_LEUKEMIC_STEM_CELL_UP                                                        | 107       | Down      | 0.396819908       | 0.687055356        |
| 2731 | ST_FAS_SIGNALING_PATHWAY                                                         | 59        | Up        | 0.39723777        | 0.68752691         |
| 2732 | SUBTIL_PROGESTIN_TARGETS                                                         | 36        | Up        | 0.397528715       | 0.687778535        |
| 2733 | BIOCARTA_GRANULOCYTES_PATHWAY                                                    | 4         | Up        | 0.397855919       | 0.687985832        |
| 2734 | GREENBAUM_E2A_TARGETS_DN                                                         | 17        | Up        | 0.397939741       | 0.687985832        |
| 2735 | MASSARWEH_TAMOXIFEN_RESISTANCE_DN                                                | 218       | Up        | 0.398136067       | 0.688073488        |
| 2736 | PIEPOLI_LGI1_TARGETS_UP                                                          | 8         | Down      | 0.398602666       | 0.688628006        |
| 2737 | LAU_APOPTOSIS_CDKN2A_UP                                                          | 54        | Up        | 0.398886067       | 0.688865741        |
| 2738 | BORCZUK_MALIGNANT_MESOTHELIOMA_DN                                                | 65        | Down      | 0.399287783       | 0.689297798        |
| 2739 | KEGG_PHENYLALANINE_METABOLISM                                                    | 11        | Up        | 0.399428015       | 0.689297798        |
| 2740 | REACTOME_PLATELET_HOMEOSTASIS                                                    | 58        | Up        | 0.399823416       | 0.689728236        |
| 2741 | PID_NOTCH_PATHWAY                                                                | 52        | Down      | 0.400474648       | 0.69059953         |
| 2742 | MIKKELSEN_MEF_ICP_WITH_H3K27ME3                                                  | 99        | Down      | 0.401095883       | 0.690996668        |
| 2743 | REACTOME_SYNTHESIS_OF_PIPS_AT_THE_EARLY_ENDOSOME_MEMBRANE                        | 12        | Up        | 0.401147287       | 0.690996668        |
| 2744 | TESAR_ALK_AND_JAK_TARGETS_MOUSE_ES_D4_UP                                         | 2         | Down      | 0.401247882       | 0.690996668        |
| 2745 | FOURNIER_ACINAR_DEVELOPMENT_EARLY_UP                                             | 21        | Down      | 0.401289917       | 0.690996668        |
| 2746 | REACTOME_NFKB_ACTIVATION_THROUGH_FADD_RIP1_PATHWAY_MEDIATED_BY_CASPASE_8_AND_D10 | 12        | Up        | 0.401646307       | 0.691342049        |
| 2747 | SETLUR_PROSTATE_CANCER_TMPRSS2_ERG_FUSION_UP                                     | 64        | Down      | 0.402093733       | 0.691342049        |
| 2748 | <b>RAMPON_ENRICHED_LEARNING_ENVIRONMENT_EARLY_UP</b>                             | <b>13</b> | <b>Up</b> | <b>0.40218164</b> | <b>0.691342049</b> |
| 2749 | REACTOME_FORMATION_OF_TRANSCRIPTION_COUPLED_NER_TC_NER_REPAIR_COMPLEX            | 26        | Down      | 4.02E-01          | 6.91E-01           |
| 2750 | KYNG_DNA_DAMAGE_UP                                                               | 184       | Up        | 4.02E-01          | 6.91E-01           |
| 2751 | BIOCARTA_EIF4_PATHWAY                                                            | 23        | Down      | 0.403105273       | 0.692608151        |
| 2752 | REACTOME_REGULATION_OF_MRNA_STABILITY_BY_PROTEINS_THAT_BIND_AU_RICH_ELEMENTS     | 79        | Down      | 0.403620163       | 0.693240738        |

|      | A                                                    | B   | C    | D           | E           |
|------|------------------------------------------------------|-----|------|-------------|-------------|
| 2753 | CHIARETTI_ACUTE_LYMPHOBLASTIC_LEUKEMIA_Z<br>AP70     | 58  | Up   | 0.40384657  | 0.693251346 |
| 2754 | IVANOVA_HEMATOPOIESIS_STEM_CELL_SHORT_<br>TERM       | 27  | Down | 0.403919779 | 0.693251346 |
| 2755 | PID_ERB_GENOMIC_PATHWAY                              | 12  | Down | 0.40422557  | 0.693524261 |
| 2756 | GRADE_COLON_AND_RECTAL_CANCER_DN                     | 79  | Up   | 0.404519687 | 0.693577627 |
| 2757 | DAVIES_MULTIPLE_MYELOMA_VS_MGUS_UP                   | 11  | Up   | 0.404550252 | 0.693577627 |
| 2758 | PID_IL1_PATHWAY                                      | 29  | Up   | 0.404747108 | 0.693663433 |
| 2759 | FLOTHO_PEDIATRIC_ALL_THERAPY_RESPONSE_D<br>N         | 26  | Down | 0.405387586 | 0.693803668 |
| 2760 | REACTOME_POST_TRANSLATIONAL_PROTEIN_M<br>ODIFICATION | 154 | Up   | 0.405442349 | 0.693803668 |
| 2761 | COLLIS_PRKDC_REGULATORS                              | 15  | Down | 0.405450476 | 0.693803668 |
| 2762 | ODONNELL_METASTASIS_UP                               | 56  | Down | 0.405552018 | 0.693803668 |
| 2763 | RUAN_RESPONSE_TO_TNF_UP                              | 7   | Up   | 0.405563118 | 0.693803668 |
| 2764 | RODRIGUES_NTN1_TARGETS_DN                            | 130 | Up   | 0.40580366  | 0.693963913 |
| 2765 | REACTOME_DNA_REPAIR                                  | 100 | Down | 0.406984072 | 0.69573073  |
| 2766 | CHEOK_RESPONSE_TO_MERCAPTOPYRINE_UP                  | 13  | Down | 0.407433129 | 0.696246487 |
| 2767 | PID_MAPK_TRK_PATHWAY                                 | 34  | Down | 0.407951804 | 0.696662691 |
| 2768 | REACTOME_CD28_DEPENDENT_VAV1_PATHWAY                 | 8   | Down | 0.40797157  | 0.696662691 |
| 2769 | AMIT_EGF_RESPONSE_20_MCF10A                          | 14  | Up   | 0.408252556 | 0.696794659 |
| 2770 | ZHAN_MULTIPLE_MYELOMA_CD2_DN                         | 42  | Up   | 0.408388709 | 0.696794659 |
| 2771 | WANG_BARRETTS_ESOPHAGUS_DN                           | 21  | Up   | 0.40849126  | 0.696794659 |
| 2772 | IIZUKA_LIVER_CANCER_PROGRESSION_L0_L1_UP             | 15  | Up   | 0.409010218 | 0.697394668 |
| 2773 | ZWANG_DOWN_BY_2ND_EGF_PULSE                          | 211 | Down | 0.409153059 | 0.697394668 |
| 2774 | CHEN_ETV5_TARGETS_SERTOLI                            | 9   | Up   | 0.409357689 | 0.697394668 |
| 2775 | KIM_GASTRIC_CANCER_CHEMOSENSITIVITY                  | 82  | Down | 0.409550952 | 0.697394668 |
| 2776 | KOBAYASHI_EGFR_SIGNALING_6HR_UP                      | 7   | Down | 0.409580995 | 0.697394668 |
| 2777 | TAKEDA_TARGETS_OF_NUP98_HOXA9_FUSION_3<br>D_DN       | 15  | Up   | 0.410831968 | 0.699272712 |

|      | A                                                    | B          | C           | D                  | E                  |
|------|------------------------------------------------------|------------|-------------|--------------------|--------------------|
| 2778 | HOLLEMAN_ASPARAGINASE_RESISTANCE_ALL_D<br>N          | 24         | Down        | 0.411271744        | 0.699705491        |
| 2779 | PENG_LEUCINE_DEPRIVATION_DN                          | 184        | Down        | 0.411640004        | 0.699705491        |
| 2780 | KEGG_LINOLEIC_ACID_METABOLISM                        | 9          | Up          | 0.41173325         | 0.699705491        |
| 2781 | MIKKELSEN_IPS_WITH_HCP_H3K27ME3                      | 36         | Down        | 0.411800244        | 0.699705491        |
| 2782 | BERGER_MBD2_TARGETS                                  | 2          | Up          | 0.411854911        | 0.699705491        |
| 2783 | MCBRYAN_PUBERTAL_BREAST_6_7WK_DN                     | 64         | Up          | 0.412101031        | 0.699705491        |
| 2784 | REACTOME_DOWNSTREAM_TCR_SIGNALING                    | 24         | Down        | 0.412122832        | 0.699705491        |
| 2785 | WHITESIDE_CISPLATIN_RESISTANCE_DN                    | 13         | Up          | 0.412454073        | 0.699798942        |
| 2786 | REACTOME_PECAM1_INTERACTIONS                         | 8          | Up          | 0.412474086        | 0.699798942        |
| 2787 | TURASHVILI_BREAST_CARCINOMA_DUCTAL_VS_L<br>OBULAR_DN | 5          | Up          | 0.413361876        | 0.701053433        |
| 2788 | DELACROIX_RAR_TARGETS_UP                             | 36         | Up          | 0.413515911        | 0.701063036        |
| 2789 | <b>ST_INTEGRIN_SIGNALING_PATHWAY</b>                 | <b>75</b>  | <b>Up</b>   | <b>0.413765252</b> | <b>0.701234152</b> |
| 2790 | REACTOME_G1_PHASE                                    | 33         | Up          | 4.14E-01           | 7.02E-01           |
| 2791 | REACTOME_GPVI_MEDIATED_ACTIVATION_CASC<br>ADE        | 25         | Down        | 4.14E-01           | 7.02E-01           |
| 2792 | MIDORIKAWA_AMPLIFIED_IN_LIVER_CANCER                 | 47         | Up          | 0.415696958        | 0.703750672        |
| 2793 | GUENTHER_GROWTH_SPHERICAL_VS_ADHERENT<br>_UP         | 17         | Down        | 0.416106965        | 0.704192482        |
| 2794 | PID_P38_MKK3_6PATHWAY                                | 25         | Down        | 0.41639196         | 0.704422488        |
| 2795 | REACTOME_P75NTR_RECRUITS_SIGNALLING_CO<br>MPLEXES    | 10         | Up          | 0.416695988        | 0.704436891        |
| 2796 | <b>MIKKELSEN_MEF_HCP_WITH_H3K27ME3</b>               | <b>324</b> | <b>Down</b> | <b>0.416931718</b> | <b>0.704436891</b> |
| 2797 | BACOLOD_RESISTANCE_TO_ALKYLATING_AGENT<br>S_DN       | 55         | Up          | 0.417027412        | 0.704436891        |
| 2798 | KEGG_UBIQUITIN_MEDIATED_PROTEOLYSIS                  | 129        | Down        | 0.417040907        | 0.704436891        |
| 2799 | TERAO_AOX4_TARGETS_SKIN_UP                           | 34         | Up          | 0.417145909        | 0.704436891        |
| 2800 | SABATES_COLORECTAL_ADENOMA_DN                        | 151        | Up          | 0.417507487        | 0.704795596        |
| 2801 | HO_LIVER_CANCER_VASCULAR_INVASION                    | 11         | Down        | 0.41772607         | 0.704912743        |
| 2802 | NADERI_BREAST_CANCER_PROGNOSIS_DN                    | 15         | Down        | 0.418038047        | 0.705187351        |
| 2803 | PID_ERBB1_INTERNALIZATION_PATHWAY                    | 40         | Down        | 0.418290763        | 0.705361833        |

|      | A                                                                     | B   | C    | D           | E           |
|------|-----------------------------------------------------------------------|-----|------|-------------|-------------|
| 2804 | REACTOME_CGMP_EFFECTS                                                 | 14  | Up   | 0.418669535 | 0.70560589  |
| 2805 | BIOCARTA_STATHMIN_PATHWAY                                             | 11  | Up   | 0.418773844 | 0.70560589  |
| 2806 | BIOCARTA_DNAFRAGMENT_PATHWAY                                          | 9   | Down | 0.418944481 | 0.70560589  |
| 2807 | BIOCARTA_CARM1_PATHWAY                                                | 12  | Up   | 0.419122215 | 0.70560589  |
| 2808 | MIKKELSEN_MEF_HCP_WITH_H3_UNMETHYLATE<br>D                            | 113 | Up   | 0.419182166 | 0.70560589  |
| 2809 | XU_HGF_SIGNALING_NOT_VIA_AKT1_48HR_DN                                 | 20  | Up   | 0.419496749 | 0.705883953 |
| 2810 | RAMASWAMY_METASTASIS_DN                                               | 46  | Up   | 0.42005614  | 0.706562472 |
| 2811 | PLASARI_TGFB1_SIGNALING_VIA_NFIC_1HR_DN                               | 95  | Down | 0.420298512 | 0.706562472 |
| 2812 | BIOCARTA_CREB_PATHWAY                                                 | 24  | Up   | 0.420475536 | 0.706562472 |
| 2813 | REACTOME_PLATELET_ADHESION_TO_EXPOSED_<br>COLLAGEN                    | 7   | Up   | 0.420668129 | 0.706562472 |
| 2814 | BYSTRYKH_HEMATOPOIESIS_STEM_CELL_AND_B<br>RAIN_QTL_TRANS              | 164 | Down | 0.420943738 | 0.706562472 |
| 2815 | REACTOME_ANDROGEN_BIOSYNTHESIS                                        | 3   | Up   | 0.42102722  | 0.706562472 |
| 2816 | LEE_DIFFERENTIATING_T_LYMPHOCYTE                                      | 143 | Down | 0.421086898 | 0.706562472 |
| 2817 | MCCLUNG_DELTA_FOSB_TARGETS_8WK                                        | 42  | Up   | 0.42109628  | 0.706562472 |
| 2818 | KRIGE_RESPONSE_TO_TOSEDOSTAT_24HR_DN                                  | 944 | Down | 0.421517295 | 0.707017826 |
| 2819 | ACEVEDO_LIVER_CANCER_UP                                               | 899 | Up   | 0.422123751 | 0.707669961 |
| 2820 | GAVIN_FOXP3_TARGETS_CLUSTER_P2                                        | 56  | Up   | 0.422205634 | 0.707669961 |
| 2821 | SIMBULAN_UV_RESPONSE_NORMAL_UP                                        | 6   | Down | 0.422617647 | 0.708109356 |
| 2822 | GENTILE_UV_HIGH_DOSE_DN                                               | 293 | Up   | 0.423339859 | 0.709068003 |
| 2823 | WONG_ENDMETRIUM_CANCER_DN                                             | 59  | Down | 0.423722671 | 0.709457696 |
| 2824 | FONTAINE_FOLLICULAR_THYROID_ADENOMA_UP                                | 64  | Down | 0.424079224 | 0.709803165 |
| 2825 | NABA_CORE_MATRISOME                                                   | 173 | Up   | 0.424622846 | 0.710461384 |
| 2826 | REACTOME_DOWNREGULATION_OF_SMAD2_3_S<br>MAD4_TRANSCRIPTIONAL_ACTIVITY | 19  | Down | 0.424861528 | 0.710609105 |
| 2827 | MARIADASON_REGULATED_BY_HISTONE_ACETYL<br>ATION_DN                    | 49  | Down | 0.425212872 | 0.710940274 |
| 2828 | PID_SMAD2_3NUCLEAR_PATHWAY                                            | 67  | Up   | 0.425382674 | 0.710940274 |

|      | A                                                   | B         | C           | D                  | E                  |
|------|-----------------------------------------------------|-----------|-------------|--------------------|--------------------|
| 2829 | POS_RESPONSE_TO_HISTAMINE_DN                        | 11        | Up          | 0.425510919        | 0.710940274        |
| 2830 | <b>SCHAEFFER_PROSTATE_DEVELOPMENT_12HR_DN</b>       | <b>44</b> | <b>Down</b> | <b>0.42588375</b>  | <b>0.711311671</b> |
| 2831 | BARRIER_COLON_CANCER_RECURRENCE_DN                  | 20        | Down        | 4.26E-01           | 7.11E-01           |
| 2832 | BIOCARTA_LEPTIN_PATHWAY                             | 9         | Up          | 4.27E-01           | 7.13E-01           |
| 2833 | NIKOLSKY_BREAST_CANCER_19Q13.4_AMPLICON             | 7         | Down        | 0.427290363        | 0.712682861        |
| 2834 | REACTOME_COSTIMULATION_BY_THE_CD28_FAMILY           | 43        | Up          | 0.427308052        | 0.712682861        |
| 2835 | REACTOME_G_ALPHA1213_SIGNALLING_EVENTS              | 64        | Down        | 0.427577837        | 0.712881185        |
| 2836 | KYNG_RESPONSE_TO_H2O2_VIA_ERCC6_DN                  | 41        | Down        | 0.428037692        | 0.713178579        |
| 2837 | <b>DAZARD_UV_RESPONSE_CLUSTER_G3</b>                | <b>12</b> | <b>Up</b>   | <b>0.428058085</b> | <b>0.713178579</b> |
| 2838 | BALLIF_DEVELOPMENTAL_DISABILITY_P16_P12_DELETION    | 9         | Up          | 0.428322617        | 0.71336777         |
| 2839 | HOFMANN_MYELODYSPLASTIC_SYNDROME_HIGH_RISK_DN       | 9         | Down        | 0.42868511         | 0.713719924        |
| 2840 | IVANOVA_HEMATOPOIESIS_STEM_CELL                     | 214       | Up          | 0.428972382        | 0.713946639        |
| 2841 | GOERING_BLOOD_HDL_CHOLESTEROL_QTL_TRANS             | 11        | Down        | 0.429158647        | 0.714005144        |
| 2842 | KEGG_TYPE_I_DIABETES_MELLITUS                       | 21        | Up          | 0.429796928        | 0.714600786        |
| 2843 | ANASTASSIOU_CANCER_MESENCHYMAL_TRANSITION_SIGNATURE | 49        | Up          | 0.42981914         | 0.714600786        |
| 2844 | CAMPS_COLON_CANCER_COPY_NUMBER_DN                   | 35        | Up          | 0.430196658        | 0.714976858        |
| 2845 | BALDWIN_PRKCI_TARGETS_UP                            | 31        | Up          | 0.431083206        | 0.716042809        |
| 2846 | HOWLIN_CITED1_TARGETS_1_UP                          | 26        | Down        | 0.431266436        | 0.716042809        |
| 2847 | GAUSSMANN_MLL_AF4_FUSION_TARGETS_G_UP               | 172       | Up          | 0.431292664        | 0.716042809        |
| 2848 | BIOCARTA_PROTEASOME_PATHWAY                         | 28        | Down        | 0.431482803        | 0.716106865        |
| 2849 | MEISSNER_BRAIN_HCP_WITH_H3K4ME3_AND_H3K27ME3        | 841       | Up          | 0.431789746        | 0.716236019        |
| 2850 | NABA_MATRISOME                                      | 509       | Up          | 0.431968374        | 0.716236019        |

|      | A                                                                                     | B   | C    | D           | E           |
|------|---------------------------------------------------------------------------------------|-----|------|-------------|-------------|
| 2851 | HAMAI_APOPTOSIS_VIA_TRAIL_DN                                                          | 154 | Down | 0.432123179 | 0.716236019 |
| 2852 | MATTIOLI_MGUS_VS_PCL                                                                  | 90  | Down | 0.432218093 | 0.716236019 |
| 2853 | CHUANG_OXIDATIVE_STRESS_RESPONSE_DN                                                   | 10  | Down | 0.432433391 | 0.716236019 |
| 2854 | JOHNSTONE_PARVB_TARGETS_2_DN                                                          | 325 | Up   | 0.43247013  | 0.716236019 |
| 2855 | AUJLA_IL22_AND_IL17A_SIGNALING                                                        | 2   | Up   | 0.432937692 | 0.716516213 |
| 2856 | REACTOME_RESOLUTION_OF_AP_SITES_VIA_THE_MULTIPLE_NUCLEOTIDE_PATCH_REPLACEMENT_PATHWAY | 16  | Down | 0.432942601 | 0.716516213 |
| 2857 | BROWNE_INTERFERON_RESPONSIVE_GENES                                                    | 45  | Up   | 0.43322943  | 0.716739865 |
| 2858 | REACTOME_THROMBOXANE_SIGNALLING_THROUGH_TP_RECEPTOR                                   | 17  | Up   | 0.43432601  | 0.71814493  |
| 2859 | REACTOME_G_ALPHA_I_SIGNALLING_EVENTS                                                  | 82  | Up   | 0.43438269  | 0.71814493  |
| 2860 | AGUIRRE_PANCREATIC_CANCER_COPY_NUMBER_UP                                              | 279 | Down | 0.434975077 | 0.718872767 |
| 2861 | BIOCARTA_CELL2CELL_PATHWAY                                                            | 13  | Up   | 0.435390295 | 0.719083473 |
| 2862 | OSWALD_HEMATOPOIETIC_STEM_CELL_IN_COLLAGEN_GEL_DN                                     | 231 | Up   | 0.435406945 | 0.719083473 |
| 2863 | MEISSNER_NPC_HCP_WITH_H3K27ME3                                                        | 29  | Down | 0.435742533 | 0.71927614  |
| 2864 | RASHI_NFKB1_TARGETS                                                                   | 15  | Down | 0.435828061 | 0.71927614  |
| 2865 | PIEPOLI_LGI1_TARGETS_DN                                                               | 7   | Down | 0.43656195  | 0.719707287 |
| 2866 | KYNG_ENVIRONMENTAL_STRESS_RESPONSE_NOT_BY_UV_IN_WS                                    | 9   | Up   | 0.436567459 | 0.719707287 |
| 2867 | WELCSH_BRCA1_TARGETS_DN                                                               | 139 | Down | 0.436862093 | 0.719707287 |
| 2868 | PID_MYC_ACTIV_PATHWAY                                                                 | 77  | Down | 0.436965966 | 0.719707287 |
| 2869 | REACTOME_CLASS_A1_RHODOPSIN_LIKE_RECEPTORS                                            | 88  | Up   | 0.436994246 | 0.719707287 |
| 2870 | MA_PITUITARY_FETAL_VS_ADULT_UP                                                        | 24  | Down | 0.437003218 | 0.719707287 |
| 2871 | REACTOME_FGFR1_LIGAND_BINDING_AND_ACTIVATION                                          | 5   | Down | 0.437223668 | 0.719819453 |
| 2872 | KEGG_ENDOMETRIAL_CANCER                                                               | 49  | Down | 4.38E-01    | 7.20E-01    |
| 2873 | REACTOME_NEURONAL_SYSTEM                                                              | 198 | Down | 4.38E-01    | 7.20E-01    |
| 2874 | CHESLER_BRAIN_HIGHEST_EXPRESSION                                                      | 37  | Down | 0.438071936 | 0.720387397 |

|      | A                                                                       | B   | C    | D           | E           |
|------|-------------------------------------------------------------------------|-----|------|-------------|-------------|
| 2875 | REACTOME_RAF_MAP_KINASE_CASCADE                                         | 10  | Down | 0.438178493 | 0.720387397 |
| 2876 | SCHRAETS_MLL_TARGETS_DN                                                 | 21  | Down | 0.438337215 | 0.720397683 |
| 2877 | DUTERTRE_ESTRADIOL_RESPONSE_6HR_DN                                      | 80  | Down | 0.438810366 | 0.720924541 |
| 2878 | REACTOME_ACTIVATED_AMPK_STIMULATES_FAT<br>TY_ACID_OXIDATION_IN_MUSCLE   | 17  | Up   | 0.439110802 | 0.721167376 |
| 2879 | LIU_IL13_MEMORY_MODEL_UP                                                | 14  | Up   | 0.439330526 | 0.721277531 |
| 2880 | ST_INTERFERON_GAMMA_PATHWAY                                             | 8   | Up   | 0.439568264 | 0.721417176 |
| 2881 | BIOCARTA_MAPK_PATHWAY                                                   | 83  | Up   | 0.439889527 | 0.721693755 |
| 2882 | BIOCARTA_EDG1_PATHWAY                                                   | 23  | Up   | 0.440191353 | 0.721938266 |
| 2883 | REACTOME_IONOTROPIC_ACTIVITY_OF_KAINATE<br>_RECEPTORS                   | 10  | Down | 0.440427886 | 0.721953018 |
| 2884 | BOYALT_LIVER_CANCER_SUBCLASS_G12_UP                                     | 37  | Up   | 0.440505937 | 0.721953018 |
| 2885 | REACTOME_SIGNALING_BY_NOTCH4                                            | 11  | Up   | 0.440817387 | 0.72214507  |
| 2886 | REACTOME_GLYCOSAMINOGLYCAN_METABOLIS<br>M                               | 90  | Down | 0.440928789 | 0.72214507  |
| 2887 | ENK_UV_RESPONSE_KERATINOCYTE_DN                                         | 470 | Up   | 0.441133468 | 0.722229951 |
| 2888 | SMID_BREAST_CANCER_ERBB2_DN                                             | 5   | Down | 0.441769833 | 0.722935952 |
| 2889 | REACTOME_TRANSCRIPTIONAL_ACTIVITY_OF_SM<br>AD2_SMAD3_SMAD4_HETEROTRIMER | 36  | Up   | 0.441870694 | 0.722935952 |
| 2890 | MATZUK_OVULATION                                                        | 11  | Up   | 0.442050624 | 0.722979993 |
| 2891 | REACTOME_REGULATION_OF_THE_FANCONI_AN<br>EMIA_PATHWAY                   | 6   | Down | 0.442634784 | 0.723684897 |
| 2892 | KEGG_ARRHYTHMOGENIC_RIGHT_VENTRICULAR<br>_CARDIOMYOPATHY_ARVC           | 59  | Up   | 0.443067857 | 0.723715048 |
| 2893 | AFFAR_YY1_TARGETS_UP                                                    | 174 | Up   | 0.443101543 | 0.723715048 |
| 2894 | REACTOME_SIGNALING_BY_ERBB4                                             | 74  | Up   | 0.443112727 | 0.723715048 |
| 2895 | REACTOME_NCAM1_INTERACTIONS                                             | 35  | Up   | 0.443461397 | 0.724034243 |
| 2896 | REACTOME_STRIATED_MUSCLE_CONTRACTION                                    | 18  | Down | 0.444702985 | 0.725810572 |
| 2897 | KEGG_GLYCOPHINGOLIPID_BIOSYNTHESIS_LACT<br>O_AND_NEOLACTO_SERIES        | 20  | Down | 0.444957817 | 0.72597572  |
| 2898 | ZWANG_EGF_PERSISTENTLY_DN                                               | 48  | Down | 0.445290305 | 0.726267411 |
| 2899 | SEMBA_FHIT_TARGETS_UP                                                   | 7   | Down | 0.445674545 | 0.726524701 |



|      | A                                                        | B         | C         | D                  | E                  |
|------|----------------------------------------------------------|-----------|-----------|--------------------|--------------------|
| 2900 | NUMATA_CSF3_SIGNALING_VIA_STAT3                          | 16        | Down      | 0.445755579        | 0.726524701        |
| 2901 | GROSS_HYPOXIA_VIA_ELK3_AND_HIF1A_UP                      | 132       | Up        | 0.446054888        | 0.726761843        |
| 2902 | REACTOME_GENERIC_TRANSCRIPTION_PATHWAY                   | 315       | Down      | 0.446441972        | 0.727141784        |
| 2903 | ELVIDGE_HYPOXIA_BY_DMOG_DN                               | 55        | Up        | 0.446966872        | 0.727745854        |
| 2904 | FARMER_BREAST_CANCER_CLUSTER_1                           | 11        | Up        | 0.447189385        | 0.727785538        |
| 2905 | RIZKI_TUMOR_INVASIVENESS_2D_UP                           | 56        | Up        | 0.447299302        | 0.727785538        |
| 2906 | CASTELLANO_HRAS_TARGETS_UP                               | 4         | Down      | 0.447744608        | 0.728199167        |
| 2907 | KEGG_NEUROACTIVE_LIGAND_RECEPTOR_INTERACTION             | 121       | Down      | 0.447861752        | 0.728199167        |
| 2908 | URS_ADIPOCYTE_DIFFERENTIATION_UP                         | 51        | Up        | 0.44839863         | 0.728821303        |
| 2909 | FARDIN_HYPOXIA_9                                         | 7         | Up        | 0.448865651        | 0.728975883        |
| 2910 | HOWLIN_CITED1_TARGETS_1_DN                               | 34        | Up        | 0.448894253        | 0.728975883        |
| 2911 | LEIN_MIDBRAIN_MARKERS                                    | 58        | Up        | 0.448957368        | 0.728975883        |
| 2912 | <b>STAEGE_EWING_FAMILY_TUMOR</b>                         | <b>24</b> | <b>Up</b> | <b>0.449110856</b> | <b>0.728975883</b> |
| 2913 | BOYAULT_LIVER_CANCER_SUBCLASS_G123_UP                    | 45        | Down      | 4.49E-01           | 7.29E-01           |
| 2914 | REACTOME_AUTODEGRADATION_OF_THE_E3_UBIQUITIN_LIGASE_COP1 | 46        | Down      | 4.50E-01           | 7.29E-01           |
| 2915 | BROWNE_HCMV_INFECTION_18HR_UP                            | 158       | Down      | 0.449807254        | 0.729338375        |
| 2916 | DELACROIX_RARG_BOUND_MEF                                 | 308       | Up        | 0.450167161        | 0.729338375        |
| 2917 | REACTOME_G_ALPHA_Z_SIGNALLING_EVENTS                     | 38        | Down      | 0.450193292        | 0.729338375        |
| 2918 | REACTOME_COMPLEMENT_CASCADE                              | 9         | Up        | 0.450303246        | 0.729338375        |
| 2919 | LIN_TUMOR_ESCAPE_FROM_IMMUNE_ATTACK                      | 15        | Up        | 0.450414683        | 0.729338375        |
| 2920 | POOLA_INVASIVE_BREAST_CANCER_UP                          | 159       | Down      | 0.451175536        | 0.730320111        |
| 2921 | PID_INTEGRIN_A4B1_PATHWAY                                | 30        | Up        | 0.451509133        | 0.730609813        |
| 2922 | NIELSEN_LIPOSARCOMA_DN                                   | 19        | Up        | 0.452188338        | 0.731458369        |
| 2923 | KEGG_HOMOLOGOUS_RECOMBINATION                            | 27        | Down      | 0.45261791         | 0.731902677        |
| 2924 | PID_P73PATHWAY                                           | 71        | Down      | 0.453155703        | 0.73252162         |
| 2925 | SATO_SILENCED_EPIGENETICALLY_IN_PANCREATIC_CANCER        | 27        | Down      | 0.45340096         | 0.73266742         |
| 2926 | RUAN_RESPONSE_TO_TROGLITAZONE_DN                         | 14        | Up        | 0.453578392        | 0.732703556        |
| 2927 | MCCABE_BOUND_BY_HOXC6                                    | 307       | Down      | 0.453966581        | 0.732955139        |

|      | A                                                | B         | C           | D                  | E                  |
|------|--------------------------------------------------|-----------|-------------|--------------------|--------------------|
| 2928 | ROME_INSULIN_TARGETS_IN_MUSCLE_UP                | 416       | Up          | 0.454181436        | 0.732955139        |
| 2929 | BRACHAT_RESPONSE_TO_CAMPTOTHECIN_DN              | 43        | Up          | 0.454199502        | 0.732955139        |
| 2930 | WU_HBX_TARGETS_2_DN                              | 11        | Up          | 0.45458438         | 0.733195159        |
| 2931 | REACTOME_ION_TRANSPORT_BY_P_TYPE_ATPAS<br>ES     | 28        | Down        | 0.455009239        | 0.733195159        |
| 2932 | MYLLYKANGAS_AMPLIFICATION_HOT_SPOT_12            | 11        | Up          | 0.455064399        | 0.733195159        |
| 2933 | NUTT_GBM_VS_AO_GLIOMA_DN                         | 40        | Down        | 0.455146889        | 0.733195159        |
| 2934 | WORSCHER_TUMOR_REJECTION_UP                      | 22        | Down        | 0.455346474        | 0.733195159        |
| 2935 | BIOCARTA_PGC1A_PATHWAY                           | 19        | Down        | 0.455347124        | 0.733195159        |
| 2936 | BIOCARTA_PPARA_PATHWAY                           | 46        | Up          | 0.455434453        | 0.733195159        |
| 2937 | CADWELL_ATG16L1_TARGETS_UP                       | 44        | Up          | 0.455839907        | 0.733551835        |
| 2938 | YIH_RESPONSE_TO_ARSENITE_C4                      | 17        | Up          | 0.456090214        | 0.733551835        |
| 2939 | ROETH_TERT_TARGETS_DN                            | 2         | Up          | 0.456169595        | 0.733551835        |
| 2940 | HASLINGER_B_CLL_WITH_6Q21_DELETION               | 15        | Down        | 0.456295752        | 0.733551835        |
| 2941 | REACTOME_PRE_NOTCH_EXPRESSION_AND_PRO<br>CESSING | 41        | Down        | 0.456432253        | 0.733551835        |
| 2942 | CHANDRAN_METASTASIS_DN                           | 261       | Up          | 0.456867414        | 0.733606734        |
| 2943 | MATTHEWS_SKIN_CARCINOGENESIS_VIA_JUN             | 9         | Up          | 0.456901271        | 0.733606734        |
| 2944 | BIDUS_METASTASIS_DN                              | 136       | Down        | 0.456932194        | 0.733606734        |
| 2945 | LU_EZH2_TARGETS_UP                               | 252       | Up          | 0.45718513         | 0.733763499        |
| 2946 | REACTOME_INTRINSIC_PATHWAY_FOR_APOPTOS<br>IS     | 28        | Up          | 0.457694985        | 0.733941101        |
| 2947 | JI_METASTASIS_REPRESSED_BY_STK11                 | 20        | Down        | 0.45773647         | 0.733941101        |
| 2948 | TERAMOTO_OPN_TARGETS_CLUSTER_6                   | 24        | Up          | 0.457761783        | 0.733941101        |
| 2949 | INGRAM_SHH_TARGETS_DN                            | 52        | Up          | 0.458425289        | 0.734755593        |
| 2950 | GENTILE_RESPONSE_CLUSTER_D3                      | 59        | Down        | 0.458698951        | 0.734944912        |
| 2951 | BUDHU_LIVER_CANCER_METASTASIS_UP                 | 4         | Up          | 0.459243017        | 0.735567206        |
| 2952 | MAGRANGEAS_MULTIPLE_MYELOMA_IGG_VS_IG<br>A_UP    | 17        | Up          | 0.459608148        | 0.735666282        |
| 2953 | <b>REACTOME_SIGNALING_BY_NODAL</b>               | <b>17</b> | <b>Down</b> | <b>0.459616267</b> | <b>0.735666282</b> |
| 2954 | AMUNDSON_GAMMA_RADIATION_RESISTANCE              | 11        | Down        | 4.60E-01           | 7.36E-01           |
| 2955 | CROMER_METASTASIS_DN                             | 72        | Up          | 4.61E-01           | 7.37E-01           |

|      | A                                                                        | B   | C    | D           | E           |
|------|--------------------------------------------------------------------------|-----|------|-------------|-------------|
| 2956 | REACTOME_SOS_MEDIATED_SIGNALLING                                         | 14  | Down | 0.461085483 | 0.737022956 |
| 2957 | BUKANOVICH_T_LYMPHOCYTE_HOMING_ON_T<br>UMOR_DN                           | 19  | Down | 0.461171437 | 0.737022956 |
| 2958 | RODWELL_AGING_KIDNEY_DN                                                  | 130 | Up   | 0.461243785 | 0.737022956 |
| 2959 | REACTOME_CA_DEPENDENT_EVENTS                                             | 26  | Up   | 0.461801913 | 0.737665328 |
| 2960 | REACTOME_P53_INDEPENDENT_G1_S_DNA_DAM<br>AGE_CHECKPOINT                  | 47  | Down | 0.462283646 | 0.738185275 |
| 2961 | VERHAAK_GLIOMASTOMA_NEURAL                                               | 107 | Up   | 0.462756687 | 0.73866971  |
| 2962 | REACTOME_THE_NLRP3_INFLAMMASOME                                          | 7   | Down | 0.463014415 | 0.73866971  |
| 2963 | BROWNE_HCMV_INFECTION_2HR_UP                                             | 29  | Up   | 0.463114017 | 0.73866971  |
| 2964 | REACTOME_DSCAM_INTERACTIONS                                              | 9   | Down | 0.46321235  | 0.73866971  |
| 2965 | REACTOME_INHIBITION_OF_INSULIN_SECRETION<br>_BY_ADRENALINE_NORADRENALINE | 21  | Down | 0.463811282 | 0.738704962 |
| 2966 | WU_ALZHEIMER_DISEASE_UP                                                  | 10  | Up   | 0.463827801 | 0.738704962 |
| 2967 | BIOCARTA_EPO_PATHWAY                                                     | 18  | Up   | 0.463839153 | 0.738704962 |
| 2968 | ZHOU_INFLAMMATORY_RESPONSE_FIMA_DN                                       | 222 | Down | 0.463859814 | 0.738704962 |
| 2969 | XU_HGF_TARGETS_REPRESSED_BY_AKT1_DN                                      | 54  | Up   | 0.464318156 | 0.739185743 |
| 2970 | HOFMANN_MYELODYSPLASTIC_SYNDROM_HIGH_<br>RISK_UP                         | 10  | Down | 0.464498432 | 0.739223675 |
| 2971 | URS_ADIPOCYTE_DIFFERENTIATION_DN                                         | 23  | Down | 0.465078379 | 0.739413868 |
| 2972 | WEINMANN_ADAPTATION_TO_HYPOXIA_UP                                        | 24  | Up   | 0.465246163 | 0.739413868 |
| 2973 | HONMA_DOCETAXEL_RESISTANCE                                               | 33  | Down | 0.465247285 | 0.739413868 |
| 2974 | DER_IFN_BETA_RESPONSE_DN                                                 | 7   | Up   | 0.465388947 | 0.739413868 |
| 2975 | HOFFMANN_SMALL_PRE_BII_TO_IMMATURE_B_<br>LYMPHOCYTE_DN                   | 40  | Down | 0.465646479 | 0.739413868 |
| 2976 | REACTOME_COMMON_PATHWAY                                                  | 2   | Up   | 0.465712676 | 0.739413868 |
| 2977 | REACTOME_DESTABILIZATION_OF_MRNA_BY_AU<br>F1_HNRNP_D0                    | 49  | Down | 0.465788707 | 0.739413868 |
| 2978 | KUMAR_AUTOPHAGY_NETWORK                                                  | 59  | Down | 0.465893151 | 0.739413868 |
| 2979 | REACTOME_PYRUVATE_METABOLISM                                             | 16  | Down | 0.466167851 | 0.739413868 |
| 2980 | GRANDVAUX_IRF3_TARGETS_UP                                                | 8   | Up   | 0.466182839 | 0.739413868 |

|      | A                                                        | B         | C         | D                  | E                  |
|------|----------------------------------------------------------|-----------|-----------|--------------------|--------------------|
| 2981 | CHARAFE_BREAST_CANCER_LUMINAL_VS_MESENCHYMAL_UP          | 398       | Down      | 0.466474504        | 0.739423648        |
| 2982 | BIOCARTA_EIF_PATHWAY                                     | 16        | Down      | 0.466501988        | 0.739423648        |
| 2983 | FARMER_BREAST_CANCER_CLUSTER_8                           | 7         | Down      | 0.467372219        | 0.740372747        |
| 2984 | SILIGAN_BOUND_BY_EWS_FLT1_FUSION                         | 38        | Up        | 0.467469972        | 0.740372747        |
| 2985 | WANG_MLL_TARGETS                                         | 186       | Up        | 0.467570852        | 0.740372747        |
| 2986 | TCGA_GLIOMASTOMA_MUTATED                                 | 8         | Down      | 0.468175996        | 0.740380151        |
| 2987 | KEGG_BASE_EXCISION_REPAIR                                | 33        | Down      | 0.468256378        | 0.740380151        |
| 2988 | OXFORD_RALA_AND_RALB_TARGETS_DN                          | 9         | Up        | 0.468277201        | 0.740380151        |
| 2989 | PHESSER_TARGETS_OF_APC_AND_MBD2_DN                       | 10        | Up        | 0.46830098         | 0.740380151        |
| 2990 | REACTOME_ARMS_MEDIATED_ACTIVATION                        | 15        | Down      | 0.468385863        | 0.740380151        |
| 2991 | RADMACHER_AML_PROGNOSIS                                  | 61        | Up        | 0.468515693        | 0.740380151        |
| 2992 | GARGALOVIC_RESPONSE_TO_OXIDIZED_PHOSPHOLIPIDS_MAGENTA_DN | 12        | Down      | 0.469031159        | 0.740946917        |
| 2993 | STAT3_PATHWAY                                            | 9         | Up        | 0.46931076         | 0.741140822        |
| 2994 | <b>KANG_AR_TARGETS_UP</b>                                | <b>12</b> | <b>Up</b> | <b>0.46952903</b>  | <b>0.741237777</b> |
| 2995 | ZHAN_MULTIPLE_MYELOMA_MF_DN                              | 36        | Up        | 4.70E-01           | 7.42E-01           |
| 2996 | LIN_APC_TARGETS                                          | 73        | Down      | 4.70E-01           | 7.42E-01           |
| 2997 | YAMASHITA_LIVER_CANCER_WITH_EPCAM_DN                     | 6         | Up        | 0.470476559        | 0.741805734        |
| 2998 | REACTOME_AUTODEGRADATION_OF_CDH1_BY_CDH1_APC_C           | 56        | Down      | 0.470620734        | 0.741805734        |
| 2999 | HOLLEMAN_VINCRIStINE_RESISTANCE_B_ALL_UP                 | 37        | Down      | 0.470673776        | 0.741805734        |
| 3000 | BIOCARTA_CCR5_PATHWAY                                    | 15        | Up        | 0.47088682         | 0.741846847        |
| 3001 | <b>CORRADETTI_MTOR_PATHWAY_REGULATORS_DN</b>             | <b>6</b>  | <b>Up</b> | <b>0.471013871</b> | <b>0.741846847</b> |
| 3002 | MELLMAN_TUT1_TARGETS_UP                                  | 18        | Up        | 0.471195013        | 0.74188485         |
| 3003 | DEBOSSCHER_NFKB_TARGETS_REPRESSED_BY_GLUCOCORTICOIDS     | 5         | Down      | 0.471459594        | 0.742054157        |
| 3004 | REACTOME_FORMATION_OF_FIBRIN_CLOT_CLOT_TING_CASCADE      | 11        | Up        | 0.472003848        | 0.742304704        |

|      | A                                                                                               | B    | C    | D           | E           |
|------|-------------------------------------------------------------------------------------------------|------|------|-------------|-------------|
| 3005 | DACOSTA_UV_RESPONSE_VIA_ERCC3_COMMON_DN                                                         | 469  | Up   | 0.472087632 | 0.742304704 |
| 3006 | REACTOME_ACTIVATION_OF_ATR_IN_RESPONSE_TO_REPLICATION_STRESS                                    | 34   | Up   | 0.47246264  | 0.742304704 |
| 3007 | CASORELLI_ACUTE_PROMYELOCYTIC_LEUKEMIA_UP                                                       | 145  | Up   | 0.472730465 | 0.742304704 |
| 3008 | ROESSLER_LIVER_CANCER_METASTASIS_DN                                                             | 48   | Up   | 0.472972826 | 0.742304704 |
| 3009 | KAAB_HEART_ATRIUM_VS_VENTRICLE_DN                                                               | 228  | Up   | 0.473086844 | 0.742304704 |
| 3010 | PILON_KLF1_TARGETS_DN                                                                           | 1848 | Up   | 0.473165738 | 0.742304704 |
| 3011 | HOLLMANN_APOPTOSIS_VIA_CD40_UP                                                                  | 177  | Up   | 0.47335713  | 0.742304704 |
| 3012 | YIH_RESPONSE_TO_ARSENITE_C3                                                                     | 33   | Up   | 0.473413056 | 0.742304704 |
| 3013 | MONNIER_POSTRADIATION_TUMOR_ESCAPE_UP                                                           | 374  | Down | 0.473558323 | 0.742304704 |
| 3014 | SHIPP_DLCL_VS_FOLLICULAR_LYMPHOMA_DN                                                            | 29   | Up   | 0.473590909 | 0.742304704 |
| 3015 | OXFORD_RALB_TARGETS_DN                                                                          | 8    | Up   | 0.473660187 | 0.742304704 |
| 3016 | REACTOME_DESTABILIZATION_OF_MRNA_BY_BR_F1                                                       | 17   | Down | 0.473661097 | 0.742304704 |
| 3017 | WAKASUGI_HAVE_ZNF143_BINDING_SITES                                                              | 56   | Down | 0.474143095 | 0.742620099 |
| 3018 | PID_ERBB_NETWORK_PATHWAY                                                                        | 10   | Up   | 0.474176685 | 0.742620099 |
| 3019 | ZHAN_MULTIPLE_MYELOMA_CD1_AND_CD2_DN                                                            | 46   | Up   | 0.476079636 | 0.745151144 |
| 3020 | BIOCARTA_ATRBRCA_PATHWAY                                                                        | 20   | Up   | 0.476108212 | 0.745151144 |
| 3021 | REACTOME_GLUCAGON_SIGNALING_IN_METABOLIC_REGULATION                                             | 27   | Up   | 0.478344058 | 0.748202562 |
| 3022 | REACTOME_NEUROTRANSMITTER_RECEPTOR_BINDING_AND_DOWNSTREAM_TRANSMISSION_IN_THE_POSTSYNAPTIC_CELL | 105  | Down | 0.478434529 | 0.748202562 |
| 3023 | YANG_BREAST_CANCER_ESR1_DN                                                                      | 24   | Down | 0.478537708 | 0.748202562 |
| 3024 | REACTOME_PRE_NOTCH_PROCESSING_IN_GOLGI                                                          | 16   | Down | 0.47869129  | 0.748202562 |
| 3025 | NAKAMURA_METASTASIS_MODEL_UP                                                                    | 37   | Up   | 0.479045538 | 0.74821568  |
| 3026 | TONKS_TARGETS_OF_RUNX1_RUNX1T1_FUSION_GNANULOCYTE_DN                                            | 9    | Up   | 0.479411231 | 0.74821568  |

|      | A                                                              | B         | C           | D                  | E                  |
|------|----------------------------------------------------------------|-----------|-------------|--------------------|--------------------|
| 3027 | ICHIBA_GRAFT_VERSUS_HOST_DISEASE_35D_UP                        | 75        | Up          | 0.479555098        | 0.74821568         |
| 3028 | REACTOME_DEVELOPMENTAL_BIOLOGY                                 | 336       | Down        | 0.479678549        | 0.74821568         |
| 3029 | HATADA_METHYLATED_IN_LUNG_CANCER_UP                            | 270       | Up          | 0.479684973        | 0.74821568         |
| 3030 | JU_AGING_TERC_TARGETS_UP                                       | 3         | Up          | 0.479921203        | 0.74821568         |
| 3031 | REACTOME_TRANSPORT_OF_RIBONUCLEOPROTEINS_INTO_THE_HOST_NUCLEUS | 27        | Down        | 0.479972042        | 0.74821568         |
| 3032 | GAUSSMANN_MLL_AF4_FUSION_TARGETS_D_UP                          | 31        | Up          | 0.479987225        | 0.74821568         |
| 3033 | BIOCARTA_AKAP95_PATHWAY                                        | 11        | Down        | 0.480251324        | 0.74821568         |
| 3034 | REACTOME_P53_DEPENDENT_G1_DNA_DAMAGE_RESPONSE                  | 52        | Down        | 0.480407405        | 0.74821568         |
| 3035 | <b>WEBER_METHYLATED_ICP_IN_FIBROBLAST</b>                      | <b>2</b>  | <b>Down</b> | <b>0.480765933</b> | <b>0.74821568</b>  |
| 3036 | WEBER_METHYLATED_ICP_IN_SPERM_UP                               | 2         | Down        | 4.81E-01           | 7.48E-01           |
| 3037 | PID_BCR_5PATHWAY                                               | 57        | Up          | 4.81E-01           | 7.48E-01           |
| 3038 | VIETOR_IFRD1_TARGETS                                           | 20        | Down        | 0.481171983        | 0.74821568         |
| 3039 | GRADE_COLON_AND_RECTAL_CANCER_UP                               | 276       | Up          | 0.481253746        | 0.74821568         |
| 3040 | CHIARADONNA_NEOPLASTIC_TRANSFORMATION_CDC25_UP                 | 103       | Up          | 0.481358501        | 0.74821568         |
| 3041 | PID_FANCONI_PATHWAY                                            | 46        | Up          | 0.481391676        | 0.74821568         |
| 3042 | <b>ACEVEDO_LIVER_CANCER_WITH_H3K9ME3_DN</b>                    | <b>76</b> | <b>Down</b> | <b>0.481909418</b> | <b>0.748585482</b> |
| 3043 | REACTOME_REGULATION_OF_APOPTOSIS                               | 55        | Down        | 0.481946463        | 0.748585482        |
| 3044 | BIOCARTA_CTLA4_PATHWAY                                         | 8         | Down        | 0.482595242        | 0.748875941        |
| 3045 | BOYLAN_MULTIPLE_MYELOMA_C_CLUSTER_UP                           | 34        | Down        | 0.482625602        | 0.748875941        |
| 3046 | CHIANG_LIVER_CANCER_SUBCLASS_UNANNOTATED_DN                    | 188       | Down        | 0.482782298        | 0.748875941        |
| 3047 | PID_CONE_PATHWAY                                               | 8         | Up          | 0.482797546        | 0.748875941        |
| 3048 | PID_RANBP2_PATHWAY                                             | 11        | Down        | 0.482925924        | 0.748875941        |
| 3049 | MATZUK_SPERMATID_DIFFERENTIATION                               | 25        | Down        | 0.483818373        | 0.750013719        |
| 3050 | PID_ATM_PATHWAY                                                | 34        | Down        | 0.484444648        | 0.75030062         |
| 3051 | KUNINGER_IGF1_VS_PDGF_B_TARGETS_DN                             | 37        | Up          | 0.48459713         | 0.75030062         |

|      | A                                                              | B   | C    | D           | E           |
|------|----------------------------------------------------------------|-----|------|-------------|-------------|
| 3052 | TONKS_TARGETS_OF_RUNX1_RUNX1T1_FUSION<br>_GRANULOCYTE_UP       | 44  | Down | 0.484600321 | 0.75030062  |
| 3053 | CHEOK_RESPONSE_TO_MERCAPTOPYRINE_DN                            | 18  | Up   | 0.485068746 | 0.75030062  |
| 3054 | BIOCARTA_TID_PATHWAY                                           | 16  | Up   | 0.485107369 | 0.75030062  |
| 3055 | GAUSSMANN_MLL_AF4_FUSION_TARGETS_D_D<br>N                      | 8   | Up   | 0.485122704 | 0.75030062  |
| 3056 | REACTOME_CDT1_ASSOCIATION_WITH_THE_CDC<br>6_ORC_ORIGIN_COMPLEX | 53  | Down | 0.4851903   | 0.75030062  |
| 3057 | YAO_TEMPORAL_RESPONSE_TO_PROGESTERON<br>E_CLUSTER_0            | 71  | Up   | 0.485303848 | 0.75030062  |
| 3058 | PID_REG_GR_PATHWAY                                             | 58  | Up   | 0.485432592 | 0.75030062  |
| 3059 | RICKMAN_TUMOR_DIFFERENTIATED_MODERATE<br>LY_VS_POORLY_UP       | 105 | Up   | 0.486257215 | 0.751329411 |
| 3060 | BRUNEAU_SEPTATION_VENTRICULAR                                  | 5   | Down | 0.486496756 | 0.7514538   |
| 3061 | NIKOLSKY_BREAST_CANCER_19P13_AMPLICON                          | 5   | Down | 0.486773774 | 0.751635974 |
| 3062 | BIOCARTA_THelper_PATHWAY                                       | 3   | Up   | 0.487055614 | 0.751825474 |
| 3063 | DAIRKEE_TERT_TARGETS_UP                                        | 349 | Down | 0.487428756 | 0.752155739 |
| 3064 | FUNG_IL2_SIGNALING_2                                           | 4   | Up   | 0.487794055 | 0.75247369  |
| 3065 | REACTOME_ANTIGEN_PROCESSING_CROSS_PRES<br>ENTATION             | 63  | Up   | 0.488676078 | 0.753588273 |
| 3066 | PID_IGF1_PATHWAY                                               | 29  | Down | 0.489454649 | 0.754170396 |
| 3067 | PUJANA_BREAST_CANCER_WITH_BRCA1_MUTAT<br>ED_DN                 | 9   | Down | 0.489519048 | 0.754170396 |
| 3068 | MOHANKUMAR_TLX1_TARGETS_UP                                     | 387 | Up   | 0.489532403 | 0.754170396 |
| 3069 | BIOCARTA_NOS1_PATHWAY                                          | 19  | Down | 0.490150999 | 0.754416834 |
| 3070 | RAMJAUN_APOPTOSIS_BY_TGFB1_VIA_SMAD4_<br>UP                    | 7   | Up   | 0.490212005 | 0.754416834 |
| 3071 | MEISSNER_BRAIN_HCP_WITH_H3K27ME3                               | 114 | Down | 0.49024854  | 0.754416834 |
| 3072 | PAL_PRMT5_TARGETS_UP                                           | 196 | Down | 0.490331026 | 0.754416834 |
| 3073 | ZHONG_RESPONSE_TO_AZACITIDINE_AND_TSA_<br>UP                   | 156 | Up   | 0.490714727 | 0.754761421 |

|      | A                                                            | B         | C         | D                  | E                  |
|------|--------------------------------------------------------------|-----------|-----------|--------------------|--------------------|
| 3074 | KIM_BIPOLAR_DISORDER_OLIGODENDROCYTE_D<br>ENSITY_CORR_UP     | 657       | Up        | 0.490912709        | 0.754820225        |
| 3075 | KEGG_TOLL_LIKE_RECEPTOR_SIGNALING_PATHW<br>AY                | 61        | Up        | 0.491168808        | 0.754968321        |
| 3076 | <b>STANELLE_E2F1_TARGETS</b>                                 | <b>27</b> | <b>Up</b> | <b>0.491637555</b> | <b>0.755098698</b> |
| 3077 | WOTTON_RUNX_TARGETS_UP                                       | 17        | Up        | 4.92E-01           | 7.55E-01           |
| 3078 | REACTOME_CHONDROITIN_SULFATE_DERMATAN<br>_SULFATE_METABOLISM | 44        | Down      | 4.92E-01           | 7.55E-01           |
| 3079 | EPPERT_CE_HSC_LSC                                            | 30        | Up        | 0.492035327        | 0.755317388        |
| 3080 | QI_PLASMACYTOMA_DN                                           | 87        | Up        | 0.492234986        | 0.75537847         |
| 3081 | REACTOME_GABA_B_RECEPTOR_ACTIVATION                          | 29        | Down      | 0.492714093        | 0.75586821         |
| 3082 | WONG_IFNA2_RESISTANCE_DN                                     | 28        | Down      | 0.49301177         | 0.756079394        |
| 3083 | REACTOME_ACTIVATED_TAK1_MEDIATES_P38_M<br>APK_ACTIVATION     | 16        | Down      | 0.493266143        | 0.756224051        |
| 3084 | FRASOR_RESPONSE_TO_SERM_OR_FULVESTРАН<br>T_UP                | 22        | Up        | 0.493609268        | 0.756261008        |
| 3085 | NELSON_RESPONSE_TO_ANDROGEN_DN                               | 17        | Down      | 0.493794942        | 0.756261008        |
| 3086 | WU_APOPTOSIS_BY_CDKN1A_NOT_VIA_TP53                          | 11        | Up        | 0.493888918        | 0.756261008        |
| 3087 | SHEN_SMARCA2_TARGETS_UP                                      | 423       | Up        | 0.494496208        | 0.756261008        |
| 3088 | REACTOME_ORC1_REMOVAL_FROM_CHROMATI<br>N                     | 64        | Down      | 0.494568562        | 0.756261008        |
| 3089 | HOEGERKORP_CD44_TARGETS_TEMPORAL_UP                          | 11        | Down      | 0.494777893        | 0.756261008        |
| 3090 | REACTOME_CHEMOKINE_RECEPTORS_BIND_CHE<br>MOKINES             | 11        | Up        | 0.49483337         | 0.756261008        |
| 3091 | DEN_INTERACT_WITH_LCA5                                       | 26        | Up        | 0.494918268        | 0.756261008        |
| 3092 | PID_TCPTP_PATHWAY                                            | 39        | Up        | 0.495344089        | 0.756261008        |
| 3093 | KEGG_REGULATION_OF_AUTOPHAGY                                 | 19        | Up        | 0.495405658        | 0.756261008        |
| 3094 | CLIMENT_BREAST_CANCER_COPY_NUMBER_UP                         | 20        | Down      | 0.495549773        | 0.756261008        |
| 3095 | REACTOME_PLATELET_SENSITIZATION_BY_LDL                       | 14        | Up        | 0.495719449        | 0.756261008        |
| 3096 | REACTOME_PKB_MEDIATED_EVENTS                                 | 27        | Up        | 0.495849802        | 0.756261008        |
| 3097 | BIOCARTA_SET_PATHWAY                                         | 8         | Down      | 0.49586101         | 0.756261008        |
| 3098 | KEGG_DRUG_METABOLISM_OTHER_ENZYMES                           | 20        | Up        | 0.495923268        | 0.756261008        |



|      | A                                                             | B          | C         | D                  | E                  |
|------|---------------------------------------------------------------|------------|-----------|--------------------|--------------------|
| 3099 | MOREIRA_RESPONSE_TO_TSA_UP                                    | 25         | Down      | 0.496019072        | 0.756261008        |
| 3100 | YAUCH_HEDGEHOG_SIGNALING_PARACRINE_DN                         | 161        | Up        | 0.496081088        | 0.756261008        |
| 3101 | REACTOME_NUCLEOTIDE_EXCISION_REPAIR                           | 46         | Down      | 0.496295466        | 0.756261008        |
| 3102 | KEEN_RESPONSE_TO_ROSIGLITAZONE_UP                             | 35         | Down      | 0.496500427        | 0.756261008        |
| 3103 | REACTOME_ACTIVATION_OF_IRF3_IRF7_MEDIATED_BY_TBK1_IKK_EPSILON | 9          | Down      | 0.496551663        | 0.756261008        |
| 3104 | MYLLYKANGAS_AMPLIFICATION_HOT_SPOT_30                         | 4          | Down      | 0.496651409        | 0.756261008        |
| 3105 | BIOCARTA_NKT_PATHWAY                                          | 7          | Up        | 0.497015257        | 0.756431808        |
| 3106 | LUI_THYROID_CANCER_CLUSTER_3                                  | 27         | Down      | 0.49708376         | 0.756431808        |
| 3107 | GROSS_HYPOXIA_VIA_ELK3_UP                                     | 198        | Down      | 0.497504071        | 0.756827668        |
| 3108 | CREIGHTON_AKT1_SIGNALING_VIA_MTOR_DN                          | 22         | Up        | 0.497973606        | 0.757218303        |
| 3109 | VANASSE_BCL2_TARGETS_UP                                       | 26         | Up        | 0.498350232        | 0.757218303        |
| 3110 | KESHELAVA_MULTIPLE_DRUG_RESISTANCE                            | 70         | Up        | 0.498388326        | 0.757218303        |
| 3111 | DACOSTA_UV_RESPONSE_VIA_ERCC3_DN                              | 828        | Up        | 0.49843686         | 0.757218303        |
| 3112 | MARTINEZ_RB1_AND_TP53_TARGETS_DN                              | 488        | Up        | 0.498689442        | 0.757218303        |
| 3113 | VISALA_AGING_LYMPHOCYTE_UP                                    | 7          | Up        | 0.498886615        | 0.757218303        |
| 3114 | BIOCARTA_CCR3_PATHWAY                                         | 17         | Up        | 0.499159389        | 0.757218303        |
| 3115 | OSMAN_BLADDER_CANCER_UP                                       | 364        | Up        | 0.499175433        | 0.757218303        |
| 3116 | DORN_ADENOVIRUS_INFECTION_48HR_UP                             | 13         | Up        | 0.499203178        | 0.757218303        |
| 3117 | <b>NABA_MATRISOME_ASSOCIATED</b>                              | <b>336</b> | <b>Up</b> | <b>0.500034811</b> | <b>0.757953848</b> |
| 3118 | CAIRO_PML_TARGETS_BOUND_BY_MYC_UP                             | 23         | Up        | 5.00E-01           | 7.58E-01           |
| 3119 | BIOCARTA_CDMAC_PATHWAY                                        | 15         | Up        | 5.00E-01           | 7.58E-01           |
| 3120 | MCCABE_HOXC6_TARGETS_CANCER_UP                                | 18         | Down      | 0.500379626        | 0.757953848        |
| 3121 | KALMA_E2F1_TARGETS                                            | 11         | Down      | 0.500539273        | 0.757953848        |
| 3122 | KAYO_AGING_MUSCLE_UP                                          | 173        | Up        | 0.500650573        | 0.757953848        |
| 3123 | PEDERSEN_METASTASIS_BY_ERBB2_ISOFORM_6                        | 18         | Up        | 0.500956791        | 0.757974405        |
| 3124 | HOLLEMAN_DAUNORUBICIN_ALL_UP                                  | 5          | Up        | 0.500984988        | 0.757974405        |
| 3125 | GAUSSMANN_MLL_AF4_FUSION_TARGETS_F_UP                         | 149        | Up        | 0.501358228        | 0.758296295        |
| 3126 | PID_ANGIOPOIETIN_RECEPTOR_PATHWAY                             | 43         | Up        | 0.50181632         | 0.758746275        |

|      | A                                                                  | B   | C    | D           | E           |
|------|--------------------------------------------------------------------|-----|------|-------------|-------------|
| 3127 | GARGALOVIC_RESPONSE_TO_OXIDIZED_PHOSPH<br>OLIPIDS_GREY_UP          | 17  | Up   | 0.502152516 | 0.759011721 |
| 3128 | PID_RXR_VDR_PATHWAY                                                | 21  | Down | 0.502647893 | 0.7593384   |
| 3129 | HOOI_ST7_TARGETS_DN                                                | 101 | Up   | 0.502690056 | 0.7593384   |
| 3130 | REACTOME_TANDEM_PORE_DOMAIN_POTASSIU<br>M_CHANNELS                 | 4   | Down | 0.503183222 | 0.759840437 |
| 3131 | ST_JNK_MAPK_PATHWAY                                                | 40  | Up   | 0.503654402 | 0.760308961 |
| 3132 | OUYANG_PROSTATE_CANCER_PROGRESSION_UP                              | 17  | Up   | 0.504017581 | 0.760614203 |
| 3133 | TONKS_TARGETS_OF_RUNX1_RUNX1T1_FUSION<br>_SUSTAINED_IN_MONOCYTE_DN | 4   | Up   | 0.5045476   | 0.76100427  |
| 3134 | LINDGREN_BLADDER_CANCER_CLUSTER_3_UP                               | 310 | Up   | 0.504598175 | 0.76100427  |
| 3135 | SCIBETTA_KDM5B_TARGETS_UP                                          | 19  | Up   | 0.50547041  | 0.762027114 |
| 3136 | BROWNE_HCMV_INFECTION_6HR_DN                                       | 142 | Up   | 0.505598942 | 0.762027114 |
| 3137 | PID_AR_NONGENOMIC_PATHWAY                                          | 30  | Down | 0.506039114 | 0.762247839 |
| 3138 | CHEOK_RESPONSE_TO_MERCAPTOPURINE_AND_<br>LD_MTX_DN                 | 15  | Up   | 0.506068036 | 0.762247839 |
| 3139 | BAUS_TFF2_TARGETS_DN                                               | 7   | Up   | 0.506617444 | 0.762513901 |
| 3140 | PID_PDGFRA_PATHWAY                                                 | 20  | Up   | 0.50680304  | 0.762513901 |
| 3141 | KEGG_NEUROTROPHIN_SIGNALING_PATHWAY                                | 114 | Up   | 0.506811642 | 0.762513901 |
| 3142 | FERRANDO_T_ALL_WITH_MLL_ENL_FUSION_UP                              | 68  | Up   | 0.506890193 | 0.762513901 |
| 3143 | WANG_NFKB_TARGETS                                                  | 12  | Down | 0.507106093 | 0.762595891 |
| 3144 | REACTOME_INWARDLY_RECTIFYING_K_CHANNEL<br>S                        | 20  | Down | 0.507292063 | 0.762632834 |
| 3145 | BOYVAULT_LIVER_CANCER_SUBCLASS_G56_UP                              | 10  | Up   | 0.50799009  | 0.762726928 |
| 3146 | BREDEMEYER_RAG_SIGNALING_NOT_VIA_ATM_<br>DN                        | 48  | Up   | 0.508004879 | 0.762726928 |
| 3147 | VANOEVELEN_MYOGENESIS_SIN3A_TARGETS                                | 211 | Up   | 0.508078848 | 0.762726928 |
| 3148 | REACTOME_KERATAN_SULFATE_BIOSYNTHESIS                              | 19  | Down | 0.50814279  | 0.762726928 |
| 3149 | ZHAN_V1_LATE_DIFFERENTIATION_GENES_UP                              | 29  | Up   | 0.508172009 | 0.762726928 |
| 3150 | BURTON_ADIPOGENESIS_2                                              | 65  | Up   | 0.508323195 | 0.762726928 |
| 3151 | RIZ_ERYTHROID_DIFFERENTIATION_HBZ                                  | 26  | Down | 0.509227636 | 0.763841454 |

|      | A                                                                              | B         | C         | D                  | E                  |
|------|--------------------------------------------------------------------------------|-----------|-----------|--------------------|--------------------|
| 3152 | GOUYER_TATI_TARGETS_DN                                                         | 16        | Up        | 0.50979192         | 0.764445198        |
| 3153 | MYLLYKANGAS_AMPLIFICATION_HOT_SPOT_7                                           | 6         | Down      | 0.510366429        | 0.765063889        |
| 3154 | SAKAI_CHRONIC_HEPATITIS_VS_LIVER_CANCER_DN                                     | 26        | Up        | 0.51064926         | 0.765245085        |
| 3155 | MOOTHA_ROS                                                                     | 7         | Up        | 0.510970617        | 0.765483882        |
| 3156 | SHIN_B_CELL_LYMPHOMA_CLUSTER_3                                                 | 18        | Up        | 0.511177854        | 0.76555162         |
| 3157 | BIOCARTA_BAD_PATHWAY                                                           | 20        | Up        | 0.511552834        | 0.76587045         |
| 3158 | <b>HAN_JNK_SINGALING_UP</b>                                                    | <b>27</b> | <b>Up</b> | <b>0.511919725</b> | <b>0.766176971</b> |
| 3159 | REACTOME_TAK1_ACTIVATES_NFKB_BY_PHOSPHORYLATION_AND_ACTIVATION_OF_IKKS_COMPLEX | 19        | Down      | 5.13E-01           | 7.67E-01           |
| 3160 | MAGRANGEAS_MULTIPLE_MYELOMA_IGLL_VS_IGLL1_UP                                   | 33        | Up        | 5.13E-01           | 7.68E-01           |
| 3161 | GUTIERREZ_WALDENSTROEMS_MACROGLOBULINEMIA_1_UP                                 | 9         | Up        | 0.513395033        | 0.76755721         |
| 3162 | FLECHNER_PBL_KIDNEY_TRANSPLANT_REJECTED_VS_OK_DN                               | 46        | Down      | 0.513491712        | 0.76755721         |
| 3163 | LY_AGING_OLD_UP                                                                | 3         | Down      | 0.514261221        | 0.768283072        |
| 3164 | PID_FAS_PATHWAY                                                                | 33        | Up        | 0.514302509        | 0.768283072        |
| 3165 | MEISSNER_NPC_HCP_WITH_H3K4ME2_AND_H3K27ME3                                     | 208       | Down      | 0.515240894        | 0.769278134        |
| 3166 | PID_LYSOPHOSPHOLIPID_PATHWAY                                                   | 61        | Up        | 0.515294242        | 0.769278134        |
| 3167 | RAO_BOUND_BY_SALL4_ISOFORM_B                                                   | 426       | Up        | 0.515673234        | 0.769600768        |
| 3168 | VALK_AML_WITH_CEBPA                                                            | 24        | Up        | 0.516085243        | 0.769972457        |
| 3169 | TANAKA_METHYLATED_IN_ESOPHAGEAL_CARCINOMA                                      | 68        | Up        | 0.516709221        | 0.770660059        |
| 3170 | JACKSON_DNMT1_TARGETS_UP                                                       | 68        | Down      | 0.516911971        | 0.770719175        |
| 3171 | REACTOME_TRANSPORT_TO_THE_GOLGI_AND_SUBSEQUENT_MODIFICATION                    | 33        | Down      | 0.517660678        | 0.771592021        |
| 3172 | VALK_AML_CLUSTER_7                                                             | 19        | Down      | 0.517982071        | 0.771697034        |
| 3173 | BIOCARTA_CXCR4_PATHWAY                                                         | 22        | Up        | 0.518113269        | 0.771697034        |
| 3174 | BERENJENO_TRANSFORMED_BY_RHOA_UP                                               | 508       | Down      | 0.518290206        | 0.771697034        |

|      | A                                                             | B          | C         | D                  | E                  |
|------|---------------------------------------------------------------|------------|-----------|--------------------|--------------------|
| 3175 | REACTOME_PREFOLDIN_MEDIATED_TRANSFER_OF_SUBSTRATE_TO_CCT_TRIC | 24         | Down      | 0.518676145        | 0.771697034        |
| 3176 | MCBRYAN_PUBERTAL_BREAST_6_7WK_UP                              | 166        | Up        | 0.51869733         | 0.771697034        |
| 3177 | NIELSEN_SYNOVIAL_SARCOMA_DN                                   | 11         | Up        | 0.518745078        | 0.771697034        |
| 3178 | REACTOME_HOST_INTERACTIONS_OF_HIV_FACTORS                     | 116        | Down      | 0.519115836        | 0.771697034        |
| 3179 | REACTOME_SEMA4D_IN_SEMAPHORIN_SIGNALING                       | 28         | Up        | 0.519210537        | 0.771697034        |
| 3180 | VALK_AML_CLUSTER_6                                            | 29         | Down      | 0.519293894        | 0.771697034        |
| 3181 | WESTON_VEGFA_TARGETS_12HR                                     | 27         | Up        | 0.519599015        | 0.771697034        |
| 3182 | LI_WILMS_TUMOR                                                | 19         | Down      | 0.519653365        | 0.771697034        |
| 3183 | ZEMBUTSU_SENSITIVITY_TO_DOXORUBICIN                           | 16         | Down      | 0.519837101        | 0.771697034        |
| 3184 | KEGG_CYTOSOLIC_DNA_SENSING_PATHWAY                            | 28         | Up        | 0.519989317        | 0.771697034        |
| 3185 | BIOCARTA_CELLCYCLE_PATHWAY                                    | 21         | Up        | 0.520017642        | 0.771697034        |
| 3186 | CHIN_BREAST_CANCER_COPY_NUMBER_UP                             | 21         | Down      | 0.52047823         | 0.772138034        |
| 3187 | BROWNE_HCMV_INFECTION_4HR_DN                                  | 213        | Up        | 0.520789209        | 0.772306143        |
| 3188 | REACTOME_TGF_BETA_RECEPTOR_SIGNALING_ACTIVATES_SMADS          | 24         | Up        | 0.52091845         | 0.772306143        |
| 3189 | ULE_SPLICING_VIA_NOVA2                                        | 39         | Up        | 0.521344822        | 0.772627585        |
| 3190 | CHEOK_RESPONSE_TO_HD_MTX_DN                                   | 24         | Down      | 0.5214623          | 0.772627585        |
| 3191 | YAO_TEMPORAL_RESPONSE_TO_PROGESTERONE_CLUSTER_10              | 67         | Down      | 0.521753713        | 0.77281702         |
| 3192 | REACTOME_MTORC1_MEDIATED_SIGNALLING                           | 11         | Up        | 0.522127515        | 0.773128332        |
| 3193 | SCHRAMM_INHBA_TARGETS_DN                                      | 19         | Down      | 0.522512167        | 0.77345551         |
| 3194 | REACTOME_TCR_SIGNALING                                        | 33         | Down      | 0.522728738        | 0.773533758        |
| 3195 | KEGG_ETHER_LIPID_METABOLISM                                   | 22         | Up        | 0.523113545        | 0.773644156        |
| 3196 | REACTOME_PLG_BETA_MEDIATED_EVENTS                             | 37         | Up        | 0.52313081         | 0.773644156        |
| 3197 | JONES_TCOF1_TARGETS                                           | 5          | Up        | 0.523501682        | 0.77395039         |
| 3198 | KEGG_COLORECTAL_CANCER                                        | 57         | Down      | 0.523814896        | 0.774129152        |
| 3199 | <b>SARRIO_EPITHELIAL_MESENCHYMAL_TRANSITION_DN</b>            | <b>118</b> | <b>Up</b> | <b>0.523950271</b> | <b>0.774129152</b> |
| 3200 | ZHOU_INFLAMMATORY_RESPONSE_FIMA_UP                            | 377        | Up        | 5.24E-01           | 7.74E-01           |

|      | A                                                                        | B   | C    | D           | E           |
|------|--------------------------------------------------------------------------|-----|------|-------------|-------------|
| 3201 | REACTOME_APOPTOTIC_CLEAVAGE_OF_CELL_ADHESION_PROTEINS                    | 9   | Up   | 5.24E-01    | 7.74E-01    |
| 3202 | REACTOME_ABC_FAMILY_PROTEINS_MEDIATED_TRANSPORT                          | 18  | Down | 0.52476374  | 0.774604396 |
| 3203 | CUI_TCF21_TARGETS_2_UP                                                   | 377 | Down | 0.525083724 | 0.774834665 |
| 3204 | REACTOME_ACTIVATED_NOTCH1_TRANSMITS_SIGNAL_TO_THE_NUCLEUS                | 24  | Up   | 0.525966948 | 0.775895669 |
| 3205 | ZHOU_CELL_CYCLE_GENES_IN_IR_RESPONSE_2HR                                 | 8   | Down | 0.527224921 | 0.777281421 |
| 3206 | SOUCEK_MYC_TARGETS                                                       | 3   | Down | 0.527235335 | 0.777281421 |
| 3207 | BRUINS_UVC_RESPONSE_EARLY_LATE                                           | 291 | Down | 0.527698267 | 0.777721245 |
| 3208 | PID_CDC42_PATHWAY                                                        | 66  | Up   | 0.527972353 | 0.77788256  |
| 3209 | REACTOME_CREB_PHOSPHORYLATION_THROUGH_THE_ACTIVATION_OF_RAS              | 24  | Down | 0.528713939 | 0.778293995 |
| 3210 | HAMAI_APOPTOSIS_VIA_TRAIL_UP                                             | 551 | Up   | 0.528904679 | 0.778293995 |
| 3211 | DACOSTA_UV_RESPONSE_VIA_ERCC3_XPCS_DN                                    | 82  | Down | 0.528912979 | 0.778293995 |
| 3212 | PID_LKB1_PATHWAY                                                         | 46  | Down | 0.529157609 | 0.778293995 |
| 3213 | WU_HBX_TARGETS_1_UP                                                      | 10  | Up   | 0.529327527 | 0.778293995 |
| 3214 | FIRESTEIN_CTNNB1_PATHWAY_AND_PROLIFERATION                               | 9   | Down | 0.529780742 | 0.778293995 |
| 3215 | BIOCARTA_GCR_PATHWAY                                                     | 15  | Up   | 0.529795455 | 0.778293995 |
| 3216 | REACTOME_ROLE_OF_DCC_IN_REGULATING_APOPTOSIS                             | 10  | Down | 0.529838998 | 0.778293995 |
| 3217 | SHIN_B_CELL_LYMPHOMA_CLUSTER_6                                           | 4   | Up   | 0.529896897 | 0.778293995 |
| 3218 | BONOME_OVARIAN_CANCER_SURVIVAL_OPTIMAL_DEBULKING                         | 208 | Up   | 0.529959081 | 0.778293995 |
| 3219 | REACTOME_A_TETRASACCHARIDE_LINKER_SEQUENCE_IS_REQUIRED_FOR_GAG_SYNTHESIS | 23  | Down | 0.530075827 | 0.778293995 |
| 3220 | BYSTRYKH_HEMATOPOIESIS_STEM_CELL_IL3RA                                   | 8   | Down | 0.530300785 | 0.778293995 |
| 3221 | LIU_TARGETS_OF_VMYB_VS_CMYB_UP                                           | 13  | Up   | 0.530508994 | 0.778293995 |
| 3222 | LEE_AGING_NEOCORTEX_DN                                                   | 59  | Down | 0.530557663 | 0.778293995 |
| 3223 | THUM_MIR21_TARGETS_HEART_DISEASE_DN                                      | 7   | Up   | 0.531022478 | 0.77873408  |

|      | A                                                                                                                         | B        | C           | D                  | E                  |
|------|---------------------------------------------------------------------------------------------------------------------------|----------|-------------|--------------------|--------------------|
| 3224 | KARLSSON_TGFB1_TARGETS_DN                                                                                                 | 197      | Up          | 0.531383885        | 0.779022294        |
| 3225 | BYSTRYKH_HEMATOPOIESIS_STEM_CELL_AND_BRAIN_QTL_CIS                                                                        | 60       | Down        | 0.531727482        | 0.779284228        |
| 3226 | LU_TUMOR_ENDOTHELIAL_MARKERS_UP                                                                                           | 18       | Down        | 0.532042643        | 0.779504337        |
| 3227 | NGO_MALIGNANT_GLIOMA_1P_LOH                                                                                               | 16       | Down        | 0.532612599        | 0.780097499        |
| 3228 | REACTOME_ANTIGEN_PROCESSING_UBIQUITINATION_PROTEASOME_DEGRADATION                                                         | 186      | Down        | 0.533311893        | 0.78087967         |
| 3229 | LASTOWSKA_NEUROBLASTOMA_COPY_NUMBER_DN                                                                                    | 770      | Down        | 0.534677914        | 0.782504647        |
| 3230 | TURJANSKI_MAPK11_TARGETS                                                                                                  | 5        | Up          | 0.534752911        | 0.782504647        |
| 3231 | REACTOME_RNA_POL_I_TRANSCRIPTION_INITIATION                                                                               | 22       | Down        | 0.53526848         | 0.783016585        |
| 3232 | TUOMISTO_TUMOR_SUPPRESSION_BY_COL13A1_UP                                                                                  | 10       | Up          | 0.536052374        | 0.783920603        |
| 3233 | REACTOME_ADVANCED_GLYCOSYLATION_ENDPRODUCTION_RECEPTOR_SIGNALING                                                          | 10       | Up          | 0.537152943        | 0.785287022        |
| 3234 | REACTOME_RESPIRATORY_ELECTRON_TRANSPORT_ATP_SYNTHESIS_BY_CHEMIOSMOTIC_COUPLING_AND_HEAT_PRODUCTION_BY_UNCOUPLING_PROTEINS | 90       | Down        | 0.537331368        | 0.785304891        |
| 3235 | NEBEN_AML_WITH_FLT3_OR_NRAS_UP                                                                                            | 5        | Down        | 0.538023701        | 0.78590116         |
| 3236 | SCHAEFFER_PROSTATE_DEVELOPMENT_AND_CANCER_BOX1_DN                                                                         | 9        | Up          | 0.538072011        | 0.78590116         |
| 3237 | BIOCARTA_TOB1_PATHWAY                                                                                                     | 8        | Down        | 0.539911877        | 0.788190976        |
| 3238 | MOREAUX_B_LYMPHOCYTE_MATURATION_BY_TACI_UP                                                                                | 71       | Up          | 0.539973373        | 0.788190976        |
| 3239 | RIZ_ERYTHROID_DIFFERENTIATION_12HR                                                                                        | 31       | Up          | 0.540338267        | 0.788480023        |
| 3240 | <b>VANDESLUIS_NORMAL_EMBRYOS_UP</b>                                                                                       | <b>1</b> | <b>Down</b> | <b>0.541125477</b> | <b>0.789005383</b> |
| 3241 | KUMAMOTO_RESPONSE_TO_NUTLIN_3A_UP                                                                                         | 9        | Up          | 5.41E-01           | 7.89E-01           |
| 3242 | BIOCARTA_RAS_PATHWAY                                                                                                      | 22       | Down        | 5.41E-01           | 7.89E-01           |
| 3243 | BREDEMEYER_RAG_SIGNALING_VIA_ATM_NOT_VIA_NFKB_DN                                                                          | 36       | Up          | 0.541366233        | 0.789005383        |

|      | A                                                                           | B   | C    | D           | E           |
|------|-----------------------------------------------------------------------------|-----|------|-------------|-------------|
| 3244 | PID_ENDOTHELIN_PATHWAY                                                      | 54  | Up   | 0.541608922 | 0.789008681 |
| 3245 | MA_MYELOID_DIFFERENTIATION_DN                                               | 31  | Up   | 0.541702468 | 0.789008681 |
| 3246 | MYLLYKANGAS_AMPLIFICATION_HOT_SPOT_15                                       | 10  | Up   | 0.541985047 | 0.789142641 |
| 3247 | CREIGHTON_ENDOCRINE_THERAPY_RESISTANCE_4                                    | 273 | Up   | 0.542148244 | 0.789142641 |
| 3248 | LOPEZ_MESOTHELIOMA_SURVIVAL_DN                                              | 12  | Down | 0.542471338 | 0.789142641 |
| 3249 | STAMBOLSKY_RESPONSE_TO_VITAMIN_D3_DN                                        | 19  | Down | 0.54255909  | 0.789142641 |
| 3250 | KEGG_GLYOXYLATE_AND_DICARBOXYLATE_METABOLISM                                | 14  | Up   | 0.542651037 | 0.789142641 |
| 3251 | SANCHEZ_MDM2_TARGETS                                                        | 10  | Down | 0.542796526 | 0.789142641 |
| 3252 | SMIRNOV_RESPONSE_TO_IR_6HR_UP                                               | 157 | Up   | 0.543016193 | 0.789219167 |
| 3253 | RODWELL_AGING_KIDNEY_NO_BLOOD_DN                                            | 139 | Up   | 0.544053577 | 0.789329217 |
| 3254 | DOANE_BREAST_CANCER_CLASSES_UP                                              | 45  | Up   | 0.544251937 | 0.789329217 |
| 3255 | BUYTAERT_PHOTODYNAMIC_THERAPY_STRESS_UP                                     | 765 | Up   | 0.544261159 | 0.789329217 |
| 3256 | SHARMA_ASTROCYTOMA_WITH_NF1_SYNDROME                                        | 3   | Down | 0.544273837 | 0.789329217 |
| 3257 | CHEBOTAEV_GR_TARGETS_DN                                                     | 94  | Down | 0.544280326 | 0.789329217 |
| 3258 | BENPORATH_ES_CORE_NINE                                                      | 8   | Up   | 0.544332779 | 0.789329217 |
| 3259 | HOFFMANN_PRE_BI_TO_LARGE_PRE_BII_LYMPHOCYTE_UP                              | 31  | Up   | 0.544539531 | 0.789329217 |
| 3260 | PID_INSULIN_GLUKOSE_PATHWAY                                                 | 23  | Down | 0.544863324 | 0.789329217 |
| 3261 | HAEGERSTRAND_RESPONSE_TO_IMATINIB                                           | 6   | Up   | 0.544949343 | 0.789329217 |
| 3262 | REACTOME_ASSOCIATION_OF_LICENSEING_FACTORS_WITH_THE_PRE_REPLICATIVE_COMPLEX | 13  | Down | 0.54499226  | 0.789329217 |
| 3263 | KYNG_ENVIRONMENTAL_STRESS_RESPONSE_NOT_BY_GAMMA_IN_WS                       | 30  | Up   | 0.54504558  | 0.789329217 |
| 3264 | REACTOME_SIGNALING_BY_NOTCH2                                                | 11  | Up   | 0.545215166 | 0.789329217 |
| 3265 | ST_PHOSPHOINOSITIDE_3_KINASE_PATHWAY                                        | 31  | Up   | 0.545263611 | 0.789329217 |
| 3266 | SASAKI_ADULT_T_CELL_LEUKEMIA                                                | 160 | Down | 0.546099396 | 0.79010017  |
| 3267 | KOBAYASHI_EGFR_SIGNALING_24HR_DN                                            | 244 | Down | 0.546130615 | 0.79010017  |
| 3268 | BIOCARTA_BCR_PATHWAY                                                        | 31  | Up   | 0.546591915 | 0.790460722 |

|      | A                                                  | B    | C    | D           | E           |
|------|----------------------------------------------------|------|------|-------------|-------------|
| 3269 | NIKOLSKY_BREAST_CANCER_1Q21_AMPLICON               | 30   | Up   | 0.546714421 | 0.790460722 |
| 3270 | LIN_MELANOMA_COPY_NUMBER_UP                        | 65   | Down | 0.547222332 | 0.79095305  |
| 3271 | BLALOCK_ALZHEIMERS_DISEASE_UP                      | 1464 | Up   | 0.548011171 | 0.791179631 |
| 3272 | BILD_MYC_ONCOGENIC_SIGNATURE                       | 194  | Down | 0.548139758 | 0.791179631 |
| 3273 | REACTOME_GABA_A_RECEPTOR_ACTIVATION                | 8    | Up   | 0.548146891 | 0.791179631 |
| 3274 | REACTOME_INTERFERON_ALPHA_BETA_SIGNALING           | 41   | Up   | 0.548152377 | 0.791179631 |
| 3275 | REACTOME_ACTIVATION_OF_THE_PRE_REPLICATIVE_COMPLEX | 29   | Up   | 0.548308699 | 0.791179631 |
| 3276 | MATZUK_SPERMATOGONIA                               | 14   | Up   | 0.548388045 | 0.791179631 |
| 3277 | KYNG_NORMAL_AGING_UP                               | 17   | Down | 0.548551211 | 0.791179631 |
| 3278 | REACTOME_OLFACTORY_SIGNALING_PATHWAY               | 2    | Down | 0.549504825 | 0.792313182 |
| 3279 | MANN_RESPONSE_TO_AMIFOSTINE_UP                     | 19   | Down | 0.550096859 | 0.792622907 |
| 3280 | BIOCARTA_EP44_PATHWAY                              | 9    | Up   | 0.55064704  | 0.792622907 |
| 3281 | MEISSNER_NPC_HCP_WITH_H3K4ME3_AND_H3K27ME3         | 109  | Up   | 0.550748013 | 0.792622907 |
| 3282 | JIANG_CORE_DUPLICON_GENES                          | 6    | Down | 5.51E-01    | 7.93E-01    |
| 3283 | SYED ESTRADIOL_RESPONSE                            | 17   | Down | 5.51E-01    | 7.93E-01    |
| 3284 | REACTOME_MITOCHONDRIAL_FATTY_ACID_BETA_OXIDATION   | 13   | Up   | 0.551096997 | 0.792622907 |
| 3285 | REACTOME_GPCR_LIGAND_BINDING                       | 142  | Up   | 0.551705522 | 0.792622907 |
| 3286 | GARCIA_TARGETS_OF_FLI1_AND_DAX1_DN                 | 159  | Up   | 0.551755698 | 0.792622907 |
| 3287 | REACTOME_LIGAND_GATED_ION_CHANNEL_TRANSPORT        | 10   | Up   | 0.551834502 | 0.792622907 |
| 3288 | YAO_TEMPORAL_RESPONSE_TO_PROGESTERONE_CLUSTER_1    | 57   | Down | 0.551834834 | 0.792622907 |
| 3289 | WANG_LMO4_TARGETS_DN                               | 328  | Down | 0.552078612 | 0.792622907 |
| 3290 | HU_GENOTOXIN_ACTION_DIRECT_VS_INDIRECT_4HR         | 30   | Down | 0.552118381 | 0.792622907 |
| 3291 | BIOCARTA_IL2_PATHWAY                               | 19   | Up   | 0.552127182 | 0.792622907 |
| 3292 | SHETH_LIVER_CANCER_VS_TXNIP_LOSS_PAM5              | 63   | Down | 0.552340485 | 0.792622907 |
| 3293 | AMUNDSON_DNA_DAMAGE_RESPONSE_TP53                  | 16   | Down | 0.55234423  | 0.792622907 |



|      | A                                                                                                | B   | C    | D           | E           |
|------|--------------------------------------------------------------------------------------------------|-----|------|-------------|-------------|
| 3294 | SASAI_TARGETS_OF_CXCR6_AND_PTCH1_DN                                                              | 6   | Down | 0.552403647 | 0.792622907 |
| 3295 | RUAN_RESPONSE_TO_TROGLITAZONE_UP                                                                 | 22  | Up   | 0.553532605 | 0.793898616 |
| 3296 | KEGG_DNA_REPLICATION                                                                             | 35  | Up   | 0.553745614 | 0.793898616 |
| 3297 | REACTOME_IL_2_SIGNALING                                                                          | 31  | Down | 0.553796791 | 0.793898616 |
| 3298 | KIM_ALL_DISORDERS_OLIGODENDROCYTE_NUM<br>BER_CORR_UP                                             | 719 | Up   | 0.554127061 | 0.794131138 |
| 3299 | LOPEZ_MESOTELIOMA_SURVIVAL_TIME_DN                                                               | 4   | Up   | 0.554334933 | 0.794188162 |
| 3300 | DANG_REGULATED_BY_MYC_UP                                                                         | 68  | Up   | 0.554940218 | 0.794608829 |
| 3301 | LEE_CALORIE_RESTRICTION_NEOCORTEX_DN                                                             | 72  | Up   | 0.554964896 | 0.794608829 |
| 3302 | SCHAEFFER_PROSTATE_DEVELOPMENT_12HR_UP                                                           | 99  | Down | 0.555195657 | 0.794698419 |
| 3303 | GILMORE_CORE_NFKB_PATHWAY                                                                        | 14  | Up   | 0.555776136 | 0.795288384 |
| 3304 | SHEDDEN_LUNG_CANCER_GOOD_SURVIVAL_A12                                                            | 202 | Up   | 0.556137729 | 0.795564871 |
| 3305 | TESAR_ALK_TARGETS_HUMAN_ES_5D_UP                                                                 | 1   | Down | 0.55658441  | 0.795962875 |
| 3306 | WEST_ADRENOCORTICAL_TUMOR_DN                                                                     | 435 | Up   | 0.556830538 | 0.796069005 |
| 3307 | OKAWA_NEUROBLASTOMA_1P36_31_DELETION                                                             | 21  | Down | 0.557133299 | 0.796069005 |
| 3308 | WAMUNYOKOLI_OVARIAN_CANCER_GRADES_1_2_DN                                                         | 56  | Up   | 0.557164063 | 0.796069005 |
| 3309 | KAUFFMANN_MELANOMA_RELAPSE_UP                                                                    | 60  | Down | 0.557618766 | 0.796477832 |
| 3310 | PALOMERO_GSI_SENSITIVITY_DN                                                                      | 4   | Down | 0.558111481 | 0.796940692 |
| 3311 | REACTOME_HOMOLOGOUS_RECOMBINATION_R<br>EPAIR_OF_REPLICATION_INDEPENDENT_DOUBLE<br>_STRAND_BREAKS | 16  | Up   | 0.55835004  | 0.797019879 |
| 3312 | DARWICHE_PAPILLOMA_RISK_HIGH_UP                                                                  | 114 | Down | 0.5585043   | 0.797019879 |
| 3313 | ZHAN_VARIABLE_EARLY_DIFFERENTIATION_GEN<br>ES_UP                                                 | 8   | Down | 0.559201065 | 0.797773259 |
| 3314 | LIM_MAMMARY_LUMINAL_PROGENITOR_UP                                                                | 30  | Up   | 0.55970946  | 0.79825753  |
| 3315 | MORI_MATURE_B_LYMPHOCYTE_DN                                                                      | 68  | Down | 0.560362537 | 0.798947793 |
| 3316 | RASHI_RESPONSE_TO_IONIZING_RADIATION_4                                                           | 50  | Up   | 0.560748706 | 0.799257205 |
| 3317 | ONO_AML1_TARGETS_DN                                                                              | 19  | Up   | 0.561623393 | 0.799683618 |

|      | A                                                             | B          | C           | D                  | E                  |
|------|---------------------------------------------------------------|------------|-------------|--------------------|--------------------|
| 3318 | SCHEIDEREIT_IKK_INTERACTING_PROTEINS                          | 55         | Up          | 0.561636739        | 0.799683618        |
| 3319 | OUELLET_OVARIAN_CANCER_INVASIVE_VS_LMP_DN                     | 10         | Down        | 0.561843315        | 0.799683618        |
| 3320 | REACTOME_REGULATION_OF_HYPOXIA_INDUCIBLE_FACTOR_HIF_BY_OXYGEN | 22         | Up          | 0.561884092        | 0.799683618        |
| 3321 | WU_HBX_TARGETS_3_DN                                           | 11         | Down        | 0.561894098        | 0.799683618        |
| 3322 | <b>CHARAFE_BREAST_CANCER_LUMINAL_VS_BASAL_UP</b>              | <b>340</b> | <b>Down</b> | <b>0.562228853</b> | <b>0.7999191</b>   |
| 3323 | BAFNA_MUC4_TARGETS_DN                                         | 4          | Up          | 5.63E-01           | 8.00E-01           |
| 3324 | WATANABE_ULCERATIVE_COLITIS_WITH_CANCER_UP                    | 18         | Up          | 5.63E-01           | 8.01E-01           |
| 3325 | BRACHAT_RESPONSE_TO_METHOTREXATE_UP                           | 25         | Down        | 0.563633645        | 0.801097004        |
| 3326 | FERRANDO_LYL1_NEIGHBORS                                       | 11         | Up          | 0.563848254        | 0.801097004        |
| 3327 | ABDULRAHMAN_KIDNEY_CANCER_VHL_UP                              | 5          | Down        | 0.564188679        | 0.801097004        |
| 3328 | BIOCARTA_RB_PATHWAY                                           | 13         | Down        | 0.564208285        | 0.801097004        |
| 3329 | <b>BIOCARTA_P35ALZHEIMERS_PATHWAY</b>                         | <b>10</b>  | <b>Up</b>   | <b>0.564573694</b> | <b>0.801097004</b> |
| 3330 | REACTOME_GLUCOSE_TRANSPORT                                    | 33         | Down        | 0.56473705         | 0.801097004        |
| 3331 | BIOCARTA_MAL_PATHWAY                                          | 17         | Up          | 0.564760231        | 0.801097004        |
| 3332 | REACTOME_REMOVAL_OF_THE_FLAP_INTERMEDIATE_FROM_THE_C_STRAND   | 10         | Down        | 0.564908112        | 0.801097004        |
| 3333 | LIEN_BREAST_CARCINOMA_METAPLASTIC                             | 27         | Up          | 0.565027819        | 0.801097004        |
| 3334 | LIANG_HEMATOPOIESIS_STEM_CELL_NUMBER_LARGE_VS_TINY_UP         | 37         | Down        | 0.565091284        | 0.801097004        |
| 3335 | WNT_SIGNALING                                                 | 71         | Down        | 0.565831647        | 0.8011726          |
| 3336 | NABA_BASEMENT_MEMBRANES                                       | 31         | Up          | 0.566012202        | 0.8011726          |
| 3337 | GOBERT_CORE_OLIGODENDROCYTE_DIFFERENTIATION                   | 37         | Up          | 0.566153713        | 0.8011726          |
| 3338 | REACTOME_SYNTHESIS_OF_GLYCOSYLPHOSPHATIDYLINOSITOL_GPI        | 17         | Down        | 0.566434581        | 0.8011726          |
| 3339 | ZHU_SKIL_TARGETS_DN                                           | 8          | Down        | 0.566542996        | 0.8011726          |
| 3340 | MARTENS_BOUND_BY_PML_RARA_FUSION                              | 392        | Up          | 0.56654877         | 0.8011726          |

|      | A                                                               | B        | C         | D                  | E                  |
|------|-----------------------------------------------------------------|----------|-----------|--------------------|--------------------|
| 3341 | SMID_BREAST_CANCER_RELAPSE_IN_BRAIN_DN                          | 67       | Up        | 0.566558012        | 0.8011726          |
| 3342 | PID_THROMBIN_PAR1_PATHWAY                                       | 39       | Up        | 0.566591915        | 0.8011726          |
| 3343 | REACTOME_VIF_MEDIATED_DEGRADATION_OF_APOBEC3G                   | 48       | Down      | 0.566945576        | 0.8011726          |
| 3344 | MIKHAYLOVA_OXIDATIVE_STRESS_RESPONSE_VIA_VHL_DN                 | 6        | Down      | 0.567008265        | 0.8011726          |
| 3345 | REACTOME_DAG_AND_IP3_SIGNALING                                  | 28       | Up        | 0.567060029        | 0.8011726          |
| 3346 | ROZANOV_MMP14_TARGETS_DN                                        | 29       | Up        | 0.567179333        | 0.8011726          |
| 3347 | MCDOWELL_ACUTE_LUNG_INJURY_DN                                   | 38       | Up        | 0.567810123        | 0.801778372        |
| 3348 | LEE_METASTASIS_AND_ALTERNATIVE_SPLICING_UP                      | 61       | Up        | 0.568009511        | 0.801778372        |
| 3349 | ST_GA13_PATHWAY                                                 | 32       | Up        | 0.568135527        | 0.801778372        |
| 3350 | REACTOME_DOWNREGULATION_OF_TGF_BETA_RECEPTOR_SIGNALING          | 21       | Up        | 0.568335167        | 0.801778372        |
| 3351 | REACTOME_FORMATION_OF_TUBULIN_FOLDING_INTERMEDIATES_BY_CCT_TRIC | 18       | Down      | 0.568456623        | 0.801778372        |
| 3352 | CHANGOLKAR_H2AFY_TARGETS_DN                                     | 32       | Up        | 0.569010308        | 0.802311629        |
| 3353 | BIOCARTA_RELA_PATHWAY                                           | 14       | Up        | 0.569174303        | 0.802311629        |
| 3354 | VANTVEER_BREAST_CANCER_BRCA1_UP                                 | 29       | Up        | 0.569682515        | 0.802668662        |
| 3355 | MATZUK_EARLY_ANTRAL_FOLLICLE                                    | 11       | Up        | 0.569837137        | 0.802668662        |
| 3356 | LABBE_WNT3A_TARGETS_DN                                          | 61       | Up        | 0.569937219        | 0.802668662        |
| 3357 | KEGG_PROXIMAL_TUBULE_BICARBONATE_RECLAMATION                    | 17       | Up        | 0.570281667        | 0.802914444        |
| 3358 | DOANE_BREAST_CANCER_CLASSES_DN                                  | 31       | Up        | 0.570855275        | 0.802993446        |
| 3359 | PID_IL2_PI3K_PATHWAY                                            | 31       | Down      | 0.570867949        | 0.802993446        |
| 3360 | IKEDA_MIR1_TARGETS_UP                                           | 52       | Up        | 0.570988799        | 0.802993446        |
| 3361 | WEBER_METHYLATED_LCP_IN_SPERM_UP                                | 1        | Up        | 0.571216696        | 0.802993446        |
| 3362 | HUNSBERGER_EXERCISE_REGULATED_GENES                             | 22       | Up        | 0.571220049        | 0.802993446        |
| 3363 | <b>HOEGERKORP_CD44_TARGETS_DIRECT_DN</b>                        | <b>9</b> | <b>Up</b> | <b>0.571357453</b> | <b>0.802993446</b> |
| 3364 | BROWNE_HCMV_INFECTION_1HR_UP                                    | 44       | Down      | 5.72E-01           | 8.03E-01           |

|      | A                                                                    | B   | C    | D           | E           |
|------|----------------------------------------------------------------------|-----|------|-------------|-------------|
| 3365 | REACTOME_REGULATION_OF_GLUKOKINASE_BY_GLUKOKINASE_REGULATORY_PROTEIN | 26  | Down | 5.72E-01    | 8.03E-01    |
| 3366 | LOPEZ_MESOTHELIOMA_SURVIVAL_OVERALL_DN                               | 14  | Up   | 0.572011441 | 0.803195857 |
| 3367 | NAKAMURA_CANCER_MICROENVIRONMENT_UP                                  | 14  | Up   | 0.57253349  | 0.80369006  |
| 3368 | SCHLOSSER_MYC_TARGETS_AND_SERUM_RESPONSE_UP                          | 47  | Up   | 0.573283214 | 0.804302715 |
| 3369 | REACTOME_RNA_POL_III_TRANSCRIPTION_TERMINATION                       | 18  | Down | 0.57331038  | 0.804302715 |
| 3370 | NAKAMURA_METASTASIS_MODEL_DN                                         | 38  | Up   | 0.573518667 | 0.8043561   |
| 3371 | BIOCARTA_FCER1_PATHWAY                                               | 34  | Up   | 0.574421934 | 0.804941205 |
| 3372 | SEMENZA_HIF1_TARGETS                                                 | 31  | Up   | 0.574422298 | 0.804941205 |
| 3373 | BIOCARTA_IL3_PATHWAY                                                 | 12  | Up   | 0.57444693  | 0.804941205 |
| 3374 | KRISHNAN_FURIN_TARGETS_DN                                            | 11  | Up   | 0.574661783 | 0.805003535 |
| 3375 | PARK_OSTEOBLAST_DIFFERENTIATION_BY_PHENYLAMIN_DN                     | 5   | Down | 0.575217093 | 0.805179295 |
| 3376 | PID_TCR_PATHWAY                                                      | 49  | Up   | 0.575527004 | 0.805179295 |
| 3377 | CROONQUIST_STROMAL_STIMULATION_UP                                    | 47  | Up   | 0.575817072 | 0.805179295 |
| 3378 | KEGG_INTESTINAL_IMMUNE_NETWORK_FOR_IGA_PRODUCTION                    | 20  | Up   | 0.575992963 | 0.805179295 |
| 3379 | REACTOME_ROLE_OF_SECOND_MESSENGERS_IN_NETRIN1_SIGNALING              | 7   | Down | 0.576028809 | 0.805179295 |
| 3380 | TCGA_GLIOMASTOMA_COPY_NUMBER_DN                                      | 26  | Down | 0.57609832  | 0.805179295 |
| 3381 | KEGG_FRUCTOSE_AND_MANNANOSE_METABOLISM                               | 29  | Down | 0.576105821 | 0.805179295 |
| 3382 | VANTVEER_BREAST_CANCER_METASTASIS_DN                                 | 116 | Down | 0.576184776 | 0.805179295 |
| 3383 | ZHAN_MULTIPLE_MYELOMA_UP                                             | 60  | Down | 0.576320926 | 0.805179295 |
| 3384 | BROWNE_HCMV_INFECTION_14HR_DN                                        | 252 | Up   | 0.576581376 | 0.805305055 |
| 3385 | SILIGAN_TARGETS_OF_EWS_FLI1_FUSION_DN                                | 17  | Up   | 0.577651603 | 0.806561414 |
| 3386 | MIKKELSEN_IPS_HCP_WITH_H3_UNMETHYLATED                               | 34  | Up   | 0.578118893 | 0.806975411 |

|      | A                                                      | B         | C           | D                  | E                  |
|------|--------------------------------------------------------|-----------|-------------|--------------------|--------------------|
| 3387 | CHUNG_BLISTER_CYTOTOXICITY_DN                          | 35        | Up          | 0.578423923        | 0.807048139        |
| 3388 | PID_P75_NTR_PATHWAY                                    | 61        | Up          | 0.578798126        | 0.807048139        |
| 3389 | BOYAUULT_LIVER_CANCER_SUBCLASS_G2                      | 25        | Up          | 0.579226338        | 0.807048139        |
| 3390 | WHITFIELD_CELL_CYCLE_M_G1                              | 140       | Down        | 0.579345502        | 0.807048139        |
| 3391 | REACTOME_POL_SWITCHING                                 | 13        | Up          | 0.579397684        | 0.807048139        |
| 3392 | KOINUMA_COLON_CANCER_MSI_DN                            | 8         | Up          | 0.579405881        | 0.807048139        |
| 3393 | POS_RESPONSE_TO_HISTAMINE_UP                           | 12        | Up          | 0.579618201        | 0.807048139        |
| 3394 | TSENG_ADIPOGENIC_POTENTIAL_DN                          | 34        | Up          | 0.579639938        | 0.807048139        |
| 3395 | REACTOME_INTRINSIC_PATHWAY                             | 7         | Down        | 0.579918872        | 0.807048139        |
| 3396 | REACTOME_SIGNALING_BY_ACTIVATED_POINT_MUTANTS_OF_FGFR1 | 4         | Down        | 0.580006745        | 0.807048139        |
| 3397 | BHATTACHARYA_EMBRYONIC_STEM_CELL                       | 87        | Down        | 0.580049837        | 0.807048139        |
| 3398 | REACTOME_MITOTIC_G1_G1_S_PHASES                        | 127       | Up          | 0.580276193        | 0.807125409        |
| 3399 | FUNG_IL2_TARGETS_WITH_STAT5_BINDING_SITES              | 5         | Up          | 0.58056885         | 0.807294825        |
| 3400 | XU_GH1_EXOGENOUS_TARGETS_UP                            | 51        | Up          | 0.580880521        | 0.807490574        |
| 3401 | DISTECHE_ESCAPED_FROM_X_INACTIVATION                   | 13        | Up          | 0.58265217         | 0.809108995        |
| 3402 | REACTOME_N_GLYCAN_ANTENNAE_ELONGATION                  | 14        | Down        | 0.583189865        | 0.809108995        |
| 3403 | KEGG_HEMATOPOIETIC_CELL_LINEAGE                        | 34        | Up          | 0.583236175        | 0.809108995        |
| 3404 | <b>MAYBURD_RESPONSE_TO_L663536_DN</b>                  | <b>53</b> | <b>Down</b> | <b>0.583524107</b> | <b>0.809108995</b> |
| 3405 | ST_JAK_STAT_PATHWAY                                    | 8         | Up          | 5.84E-01           | 8.09E-01           |
| 3406 | SMID_BREAST_CANCER_LUMINAL_A_UP                        | 47        | Up          | 5.84E-01           | 8.09E-01           |
| 3407 | ZHENG_IL22_SIGNALING_DN                                | 27        | Up          | 0.583709572        | 0.809108995        |
| 3408 | NIKOLSKY_BREAST_CANCER_20P13_AMPLICON                  | 5         | Down        | 0.583761112        | 0.809108995        |
| 3409 | ACEVEDO_NORMAL_TISSUE_ADJACENT_TO_LIVER_TUMOR_UP       | 144       | Up          | 0.583770427        | 0.809108995        |
| 3410 | NOUSHMEHR_GBM_GERMLINE_MUTATED                         | 3         | Down        | 0.583862051        | 0.809108995        |
| 3411 | <b>NIKOLSKY_BREAST_CANCER_7P22_AMPLICON</b>            | <b>33</b> | <b>Down</b> | <b>0.583928397</b> | <b>0.809108995</b> |
| 3412 | HAHTOLA_MYCOSIS_FUNGOIDES_SKIN_UP                      | 160       | Down        | 0.584387464        | 0.8093236          |
| 3413 | PID_AR_PATHWAY                                         | 55        | Down        | 0.584487508        | 0.8093236          |
| 3414 | YIH_RESPONSE_TO_ARSENITE_C5                            | 7         | Down        | 0.584760237        | 0.8093236          |

|      | A                                                  | B   | C    | D           | E           |
|------|----------------------------------------------------|-----|------|-------------|-------------|
| 3415 | OUELLET_OVARIAN_CANCER_INVASIVE_VS_LMP_UP          | 111 | Up   | 0.584809839 | 0.8093236   |
| 3416 | REACTOME_AKT_PHOSPHORYLATES_TARGETS_IN_THE_CYTOSOL | 12  | Down | 0.585225993 | 0.8093236   |
| 3417 | AMIT_SERUM_RESPONSE_20_MCF10A                      | 17  | Up   | 0.58533169  | 0.8093236   |
| 3418 | MIKKELSEN_ES_ICP_WITH_H3K4ME3                      | 548 | Up   | 0.585439865 | 0.8093236   |
| 3419 | DAZARD_RESPONSE_TO_UV_SCC_DN                       | 115 | Up   | 0.585453558 | 0.8093236   |
| 3420 | PID_SHP2_PATHWAY                                   | 49  | Up   | 0.586003151 | 0.809691546 |
| 3421 | PEREZ_TP53_TARGETS                                 | 956 | Up   | 0.586142492 | 0.809691546 |
| 3422 | BIOCARTA_NKCELLS_PATHWAY                           | 13  | Up   | 0.58627714  | 0.809691546 |
| 3423 | RIZKI_TUMOR_INVASIVENESS_2D_DN                     | 56  | Down | 0.586405179 | 0.809691546 |
| 3424 | HEDENFALK_BREAST_CANCER_HEREDITARY_VS_SPORADIC     | 50  | Up   | 0.586759266 | 0.809943773 |
| 3425 | SUZUKI_AMPLIFIED_IN_ORAL_CANCER                    | 10  | Up   | 0.587001242 | 0.809958021 |
| 3426 | WANG_LMO4_TARGETS_UP                               | 338 | Up   | 0.587112428 | 0.809958021 |
| 3427 | REACTOME_IL1_SIGNALING                             | 34  | Up   | 0.587805416 | 0.810677347 |
| 3428 | KAYO_AGING_MUSCLE_DN                               | 107 | Up   | 0.588642768 | 0.811595296 |
| 3429 | WINTER_HYPOXIA_UP                                  | 88  | Up   | 0.58914144  | 0.812045889 |
| 3430 | HOLLEMAN_ASPARAGINASE_RESISTANCE_B_ALL_UP          | 24  | Down | 0.589389385 | 0.812150727 |
| 3431 | REACTOME_EGFR_DOWNREGULATION                       | 24  | Up   | 0.589684441 | 0.812320404 |
| 3432 | BIOCARTA_TGFB_PATHWAY                              | 17  | Down | 0.590537757 | 0.813258787 |
| 3433 | FIGUEROA_AML_METHYLATION_CLUSTER_3_DN              | 30  | Up   | 0.5914856   | 0.814326766 |
| 3434 | MCCLUNG_COCAINE_REWARD_5D                          | 71  | Down | 0.592128154 | 0.814731951 |
| 3435 | PID_RAS_PATHWAY                                    | 27  | Down | 0.592235016 | 0.814731951 |
| 3436 | VALK_AML_CLUSTER_10                                | 27  | Down | 0.592297196 | 0.814731951 |
| 3437 | RICKMAN_TUMOR_DIFFERENTIATED_WELL_VS_MODERATELY_UP | 101 | Up   | 0.592576556 | 0.814878995 |
| 3438 | BIOCARTA_IL5_PATHWAY                               | 3   | Down | 0.594776871 | 0.817518808 |
| 3439 | VISALA_RESPONSE_TO_HEAT_SHOCK_AND_AGING_DN         | 13  | Down | 0.594905386 | 0.817518808 |

|      | A                                                           | B         | C           | D                  | E                  |
|------|-------------------------------------------------------------|-----------|-------------|--------------------|--------------------|
| 3440 | BIOCARTA_PTDINS_PATHWAY                                     | 22        | Down        | 0.595015276        | 0.817518808        |
| 3441 | REACTOME_REGULATION_OF_INSULIN_SECRETION_BY_ACETYLCHOLINE   | 9         | Up          | 0.595321578        | 0.817701876        |
| 3442 | SHIRAISHI_PLZF_TARGETS_DN                                   | 7         | Up          | 0.595496559        | 0.817704517        |
| 3443 | KEGG_ARGININE_AND_PROLINE_METABOLISM                        | 45        | Up          | 0.595760325        | 0.817829034        |
| 3444 | KEGG_GLYCOSAMINOGLYCAN_BIOSYNTHESIS_KE<br>RATAN_SULFATE     | 15        | Down        | 0.596048901        | 0.817962025        |
| 3445 | <b>REACTOME_SCFSKP2_MEDIATED_DEGRADATION<br/>OF_P27_P21</b> | <b>53</b> | <b>Down</b> | <b>0.596203431</b> | <b>0.817962025</b> |
| 3446 | PETRETTO_BLOOD_PRESSURE_UP                                  | 9         | Down        | 5.97E-01           | 8.19E-01           |
| 3447 | MARSHALL_VIRAL_INFECTION_RESPONSE_DN                        | 21        | Down        | 5.97E-01           | 8.19E-01           |
| 3448 | GHO_ATF5_TARGETS_DN                                         | 16        | Up          | 0.597336279        | 0.818802994        |
| 3449 | REACTOME_INTERFERON_SIGNALING                               | 115       | Up          | 0.599275623        | 0.82119842         |
| 3450 | KEGG_PARKINSONS_DISEASE                                     | 114       | Down        | 0.599431397        | 0.82119842         |
| 3451 | COURTOIS_SENESCENCE_TRIGGERS                                | 6         | Down        | 0.600162123        | 0.821961169        |
| 3452 | <b>IKEDA_MIR133_TARGETS_UP</b>                              | <b>42</b> | <b>Up</b>   | <b>0.600423349</b> | <b>0.82208065</b>  |
| 3453 | NAGY_PCAF_COMPONENTS_HUMAN                                  | 9         | Up          | 0.600658413        | 0.822164253        |
| 3454 | REACTOME_NETRIN1_SIGNALING                                  | 36        | Down        | 0.600899411        | 0.822226361        |
| 3455 | REACTOME_SIGNALING_BY_FGFR                                  | 93        | Down        | 0.601415977        | 0.822226361        |
| 3456 | GEORGANTAS_HSC_MARKERS                                      | 40        | Up          | 0.601494892        | 0.822226361        |
| 3457 | PYEON_CANCER_HEAD_AND_NECK_VS_CERVICAL<br>UP                | 174       | Up          | 0.601687226        | 0.822226361        |
| 3458 | ICHIBA_GRAFT_VERSUS_HOST_DISEASE_D7_UP                      | 70        | Up          | 0.601855852        | 0.822226361        |
| 3459 | CARD_MIR302A_TARGETS                                        | 69        | Down        | 0.602035784        | 0.822226361        |
| 3460 | KYNG_DNA_DAMAGE_BY_4NQO                                     | 32        | Up          | 0.602249175        | 0.822226361        |
| 3461 | RIZ_ERYTHROID_DIFFERENTIATION_6HR                           | 20        | Up          | 0.60226975         | 0.822226361        |
| 3462 | FLOTHO_PEDIATRIC_ALL_THERAPY_RESPONSE_U<br>P                | 46        | Up          | 0.602269933        | 0.822226361        |
| 3463 | MCBRYAN_TERMINAL_END_BUD_DN                                 | 6         | Up          | 0.60251968         | 0.822322601        |
| 3464 | MULLIGHAN_NPM1_MUTATED_SIGNATURE_2_D<br>N                   | 66        | Down        | 0.602688501        | 0.822322601        |
| 3465 | PID_CDC42_REG_PATHWAY                                       | 30        | Down        | 0.60343735         | 0.823106663        |

|      | A                                                                                          | B         | C           | D                  | E                  |
|------|--------------------------------------------------------------------------------------------|-----------|-------------|--------------------|--------------------|
| 3466 | REACTOME_PASSIVE_TRANSPORT_BY_AQUAPORINS                                                   | 3         | Down        | 0.603647741        | 0.823156011        |
| 3467 | STEGER_ADIPOGENESIS_UP                                                                     | 10        | Up          | 0.604016792        | 0.823382854        |
| 3468 | JAZAG_TGFB1_SIGNALING_UP                                                                   | 85        | Up          | 0.604162615        | 0.823382854        |
| 3469 | WU_SILENCED_BY_METHYLATION_IN_BLADDER_CANCER                                               | 36        | Up          | 0.604498062        | 0.823602463        |
| 3470 | REACTOME_JNK_C_JUN_KINASES_PHOSPHORYLATION_AND_ACTIVATION_MEDIATED_BY_ACTIVATED_HUMAN_TAK1 | 15        | Down        | 0.604912382        | 0.823701246        |
| 3471 | KIM_ALL_DISORDERS_DURATION_CORR_DN                                                         | 136       | Down        | 0.604919222        | 0.823701246        |
| 3472 | CONRAD_GERMLINE_STEM_CELL                                                                  | 7         | Down        | 0.605129062        | 0.823749587        |
| 3473 | CUI_TCF21_TARGETS_UP                                                                       | 26        | Down        | 0.605484759        | 0.823996396        |
| 3474 | XU_CREBBP_TARGETS_UP                                                                       | 23        | Up          | 0.605686227        | 0.824033234        |
| 3475 | PARK_APL_PATHOGENESIS_UP                                                                   | 11        | Up          | 0.606130071        | 0.824399708        |
| 3476 | IIZUKA_LIVER_CANCER_EARLY_RECURRENCE                                                       | 10        | Up          | 0.606943789        | 0.825121722        |
| 3477 | SHEPARD_BMYB_MORPHOLINO_DN                                                                 | 154       | Down        | 0.607133943        | 0.825121722        |
| 3478 | HOLLEMAN_ASPARAGINASE_RESISTANCE_B_ALL_DN                                                  | 14        | Down        | 0.60725116         | 0.825121722        |
| 3479 | ZHANG_GATA6_TARGETS_UP                                                                     | 11        | Up          | 0.607359439        | 0.825121722        |
| 3480 | REACTOME_PYRIMIDINE_METABOLISM                                                             | 18        | Up          | 0.607671289        | 0.825308088        |
| 3481 | MIKKELSEN_IPS_ICP_WITH_H3K4ME3_AND_H327ME3                                                 | 67        | Down        | 0.608369251        | 0.826018595        |
| 3482 | STREICHER_LSM1_TARGETS_UP                                                                  | 37        | Down        | 0.608546511        | 0.826021909        |
| 3483 | EINAV_INTERFERON_SIGNATURE_IN_CANCER                                                       | 20        | Down        | 0.608908881        | 0.826274676        |
| 3484 | KYNG_WERNER_SYNDROM_AND_NORMAL_AGING_UP                                                    | 82        | Up          | 0.609082476        | 0.826274676        |
| 3485 | LIU_NASOPHARYNGEAL_CARCINOMA                                                               | 60        | Up          | 0.609433497        | 0.826513568        |
| 3486 | <b>RADAEVA_RESPONSE_TO_IFNA1_DN</b>                                                        | <b>10</b> | <b>Down</b> | <b>0.609979268</b> | <b>0.827016367</b> |
| 3487 | REACTOME_TRAF6_MEDIATED_IRF7_ACTIVATION                                                    | 17        | Down        | 6.10E-01           | 8.27E-01           |
| 3488 | GRANDVAUX_IFN_RESPONSE_NOT_VIA_IRF3                                                        | 12        | Up          | 6.11E-01           | 8.28E-01           |



|      | A                                                               | B   | C    | D           | E           |
|------|-----------------------------------------------------------------|-----|------|-------------|-------------|
| 3489 | CHIANG_LIVER_CANCER_SUBCLASS_UNANNOTATED_UP                     | 67  | Up   | 0.612095848 | 0.828735975 |
| 3490 | PID_DELTA_NP63_PATHWAY                                          | 36  | Up   | 0.612150638 | 0.828735975 |
| 3491 | MARKS_ACETYLATED_NON_HISTONE_PROTEINS                           | 12  | Down | 0.612309855 | 0.828735975 |
| 3492 | REACTOME_REPAIR_SYNTHESIS_FOR_GAP_FILLING_BY_DNA_POL_IN_TC_NER  | 14  | Up   | 0.612502072 | 0.828735975 |
| 3493 | PID_HEDGEHOG_GLI_PATHWAY                                        | 46  | Down | 0.612558927 | 0.828735975 |
| 3494 | HOFFMANN_IMMATURE_TO_MATURE_B_LYMPHOCYTE_DN                     | 38  | Up   | 0.612650743 | 0.828735975 |
| 3495 | ZHENG_GLIOMASTOMA_PLASTICITY_UP                                 | 230 | Up   | 0.613490594 | 0.829248125 |
| 3496 | KEGG_GLYCOSAMINOGLYCAN_BIOSYNTHESIS_HEPARAN_SULFATE             | 23  | Down | 0.613806367 | 0.829248125 |
| 3497 | REACTOME_AQUAPORIN_MEDIATED_TRANSPORT                           | 34  | Up   | 0.614017273 | 0.829248125 |
| 3498 | BONOME_OVARIAN_CANCER_POOR_SURVIVAL_DN                          | 21  | Up   | 0.614032775 | 0.829248125 |
| 3499 | REACTOME_RECYCLING_PATHWAY_OF_L1                                | 27  | Up   | 0.614042397 | 0.829248125 |
| 3500 | STAMBOLSKY_RESPONSE_TO_VITAMIN_D3_UP                            | 68  | Down | 0.614082368 | 0.829248125 |
| 3501 | PID_RHODOPSIN_PATHWAY                                           | 11  | Up   | 0.614632283 | 0.829744157 |
| 3502 | VILIMAS_NOTCH1_TARGETS_DN                                       | 4   | Up   | 0.614816179 | 0.829744157 |
| 3503 | MACLACHLAN_BRCA1_TARGETS_UP                                     | 20  | Up   | 0.614976516 | 0.829744157 |
| 3504 | ZHANG_BREAST_CANCER_PROGENITORS_DN                              | 130 | Up   | 0.615709942 | 0.830496567 |
| 3505 | BIOCARTA_BARRESTIN_SRC_PATHWAY                                  | 14  | Down | 0.616806612 | 0.831738369 |
| 3506 | REACTOME_N_GLYCAN_ANTENNAE_ELONGATION_IN_THE_MEDIAL_TRANS_GOLGI | 18  | Down | 0.617152689 | 0.831967604 |
| 3507 | BIOCARTA_SHH_PATHWAY                                            | 14  | Up   | 0.617332822 | 0.831973071 |
| 3508 | HELLER_HDAC_TARGETS_UP                                          | 285 | Up   | 0.617513181 | 0.831978837 |
| 3509 | IVANOVA_HEMATOPOIESIS_STEM_CELL_LONG_TERM                       | 248 | Up   | 0.61797588  | 0.832321382 |
| 3510 | VANHARANTA_UTERINE_FIBROID_WITH_7Q_DELETION_UP                  | 66  | Up   | 0.61835031  | 0.832321382 |
| 3511 | DELACROIX_RAR_BOUND_ESTIMATES                                   | 388 | Down | 0.618403238 | 0.832321382 |

|      | A                                                                  | B        | C           | D                  | E                  |
|------|--------------------------------------------------------------------|----------|-------------|--------------------|--------------------|
| 3512 | PROVENZANI_METASTASIS_UP                                           | 179      | Up          | 0.618472037        | 0.832321382        |
| 3513 | PID_ERBB1_DOWNSTREAM_PATHWAY                                       | 103      | Up          | 0.618920098        | 0.832687205        |
| 3514 | BOSCO_TH1_CYTOTOXIC_MODULE                                         | 55       | Up          | 0.619248362        | 0.832891691        |
| 3515 | GALLUZZI_PERMEABILIZE_MITOCHONDRIA                                 | 39       | Up          | 0.619735151        | 0.833309217        |
| 3516 | DING_LUNG_CANCER_MUTATED_FREQUENTLY                                | 10       | Down        | 0.620798022        | 0.834290806        |
| 3517 | REACTOME_NEP_NS2_INTERACTS_WITH_THE_CELLULAR_EXPORT_MACHINERY      | 27       | Down        | 0.620818301        | 0.834290806        |
| 3518 | REACTOME_RIG_I_MDA5_MEDIATED_INDUCITION_OF_IFN_ALPHA_BETA_PATHWAYS | 55       | Up          | 0.622263121        | 0.834674527        |
| 3519 | MCGOWAN_RSP6_TARGETS_DN                                            | 5        | Up          | 0.622357076        | 0.834674527        |
| 3520 | REACTOME_G2_M_DNA_DAMAGE_CHECKPOINT                                | 8        | Down        | 0.622675451        | 0.834674527        |
| 3521 | BRACHAT_RESPONSE_TO_METHOTREXATE_DN                                | 25       | Up          | 0.622962517        | 0.834674527        |
| 3522 | LI_LUNG_CANCER                                                     | 33       | Down        | 0.623137391        | 0.834674527        |
| 3523 | LIU_LIVER_CANCER                                                   | 28       | Up          | 0.623268578        | 0.834674527        |
| 3524 | REACTOME_G_ALPHA_Q_SIGNALLING_EVENTS                               | 85       | Down        | 0.623529718        | 0.834674527        |
| 3525 | TONKS_TARGETS_OF_RUNX1_RUNX1T1_FUSION_MONOCYTE_DN                  | 38       | Up          | 0.623781324        | 0.834674527        |
| 3526 | REACTOME_E2F_MEDIATED_REGULATION_OF_DNA_REPLICATION                | 33       | Down        | 0.623810583        | 0.834674527        |
| 3527 | <b>REACTOME_ADENYLATE_CYCLASE_ACTIVATING_PATHWAY</b>               | <b>9</b> | <b>Down</b> | <b>0.623945687</b> | <b>0.834674527</b> |
| 3528 | HILLION_HMGA1_TARGETS                                              | 70       | Up          | 6.24E-01           | 8.35E-01           |
| 3529 | REACTOME_CDK_MEDIATED_PHOSPHORYLATION_AND_REMOVAL_OF_CDC6          | 45       | Down        | 6.24E-01           | 8.35E-01           |
| 3530 | CHAN_INTERFERON_PRODUCING_DENDRITIC_CELL                           | 2        | Down        | 0.624241906        | 0.834674527        |
| 3531 | DANG_MYC_TARGETS_UP                                                | 137      | Down        | 0.624278993        | 0.834674527        |
| 3532 | LE_SKI_TARGETS_UP                                                  | 16       | Up          | 0.624345597        | 0.834674527        |
| 3533 | LEE_CALORIE_RESTRICTION_NEOCORTEX_UP                               | 69       | Up          | 0.624413109        | 0.834674527        |
| 3534 | KEGG_PHOSPHATIDYLINOSITOL_SIGNALING_SYSTEM                         | 64       | Up          | 0.624541791        | 0.834674527        |

|      | A                                                    | B    | C    | D           | E           |
|------|------------------------------------------------------|------|------|-------------|-------------|
| 3535 | SENGUPTA_NASOPHARYNGEAL_CARCI_NOMA_UP                | 260  | Up   | 0.62465491  | 0.834674527 |
| 3536 | GOERING_BLOOD_HDL_CHOLESTEROL_QTL_CIS                | 8    | Down | 0.624708445 | 0.834674527 |
| 3537 | STAMBOLSKY_TARGETS_OF_MUTATED_TP53_UP                | 42   | Down | 0.624771794 | 0.834674527 |
| 3538 | WALLACE_JAK2_TARGETS_UP                              | 23   | Down | 0.624907309 | 0.834674527 |
| 3539 | TIMOFEeva_GROWTH_STRESS_VIA_STAT1_DN                 | 16   | Down | 0.625164133 | 0.834674527 |
| 3540 | BIOCARTA_BIOPEPTIDES_PATHWAY                         | 34   | Up   | 0.625166804 | 0.834674527 |
| 3541 | MARSON_BOUND_BY_FOXP3_UNSTIMULATED                   | 1049 | Up   | 0.62606039  | 0.835631453 |
| 3542 | FRASOR_TAMOXIFEN_RESPONSE_DN                         | 11   | Down | 0.626324144 | 0.835726062 |
| 3543 | MORI_EMU_MYC_LYMPHOMA_BY_ONSET_TIME_UP               | 108  | Down | 0.627594045 | 0.835726062 |
| 3544 | KORKOLA_CORRELATED_WITH_POU5F1                       | 31   | Up   | 0.627723304 | 0.835726062 |
| 3545 | NIKOLSKY_BREAST_CANCER_11Q12_Q14_AMPLICON            | 121  | Up   | 0.628011755 | 0.835726062 |
| 3546 | CERVERA_SDHB_TARGETS_1_DN                            | 22   | Up   | 0.628136098 | 0.835726062 |
| 3547 | TERAMOTO_OPN_TARGETS_CLUSTER_4                       | 11   | Down | 0.628599306 | 0.835726062 |
| 3548 | SCHAEFFER_PROSTATE_DEVELOPMENT_48HR_DN               | 340  | Up   | 0.628701978 | 0.835726062 |
| 3549 | WHITE_NEUROBLASTOMA_WITH_1P36.3_DELETION             | 19   | Down | 0.628746238 | 0.835726062 |
| 3550 | BIOCARTA_LAIR_PATHWAY                                | 6    | Up   | 0.628765296 | 0.835726062 |
| 3551 | KUROKAWA_LIVER_CANCER_EARLY_RECURRENCE_UP            | 11   | Up   | 0.629217787 | 0.835726062 |
| 3552 | KEGG_RENIN_ANGIOTENSIN_SYSTEM                        | 8    | Up   | 0.629336805 | 0.835726062 |
| 3553 | REACTOME_NFKB_IS_ACTIVATED_AND_SIGNALS_SURVIVAL      | 9    | Up   | 0.629481245 | 0.835726062 |
| 3554 | EPPERT_PROGENITOR                                    | 128  | Up   | 0.629621941 | 0.835726062 |
| 3555 | MARSON_FOXP3_TARGETS_STIMULATED_DN                   | 8    | Up   | 0.629677866 | 0.835726062 |
| 3556 | RICKMAN_TUMOR_DIFFERENTIATED_MODERATELY_VS_POORLY_DN | 13   | Down | 0.629686325 | 0.835726062 |
| 3557 | REACTOME_SIGNALING_BY_BMP                            | 21   | Up   | 0.629775032 | 0.835726062 |

|      | A                                                        | B   | C    | D                  | E                  |
|------|----------------------------------------------------------|-----|------|--------------------|--------------------|
| 3558 | THILLAINADESAN_ZNF217_TARGETS_UP                         | 44  | Down | 0.629782825        | 0.835726062        |
| 3559 | FIGUEROA_AML_METHYLATION_CLUSTER_2_DN                    | 4   | Down | 0.629837319        | 0.835726062        |
| 3560 | BROWNE_HCMV_INFECTION_14HR_UP                            | 138 | Up   | 0.63006919         | 0.835726062        |
| 3561 | CERIBELLI_PROMOTERS_INACTIVE_AND_BOUND_BY_NFY            | 20  | Up   | 0.630169718        | 0.835726062        |
| 3562 | ASGHARZADEH_NEUROBLASTOMA_POOR_SURVIVAL_DN               | 40  | Up   | 0.630227048        | 0.835726062        |
| 3563 | BIOCARTA_CK1_PATHWAY                                     | 14  | Up   | 0.630368327        | 0.835726062        |
| 3564 | PENG_RAPAMYCIN_RESPONSE_DN                               | 237 | Up   | 0.630388225        | 0.835726062        |
| 3565 | FAELT_B_CLL_WITH_VH_REARRANGEMENTS_DN                    | 47  | Up   | 0.630431237        | 0.835726062        |
| 3566 | LUI_THYROID_CANCER_CLUSTER_1                             | 49  | Up   | 0.630580208        | 0.835726062        |
| 3567 | KRIGE_RESPONSE_TO_TOSEDOSTAT_6HR_DN                      | 840 | Down | 0.630729976        | 0.835726062        |
| 3568 | LEE_LIVER_CANCER_CIPROFIBRATE_DN                         | 32  | Up   | <b>0.631247484</b> | <b>0.835954665</b> |
| 3569 | PID_ECADHERIN_NASCENT_AJ_PATHWAY                         | 38  | Down | 6.31E-01           | 8.36E-01           |
| 3570 | LEE_INTRATHYMIC_T_PROGENITOR                             | 17  | Up   | 6.31E-01           | 8.36E-01           |
| 3571 | BIOCARTA_HIF_PATHWAY                                     | 14  | Up   | 0.632426756        | 0.837035413        |
| 3572 | REACTOME_REGULATION_OF_WATER_BALANCE_BY_RENAL_AQUAPORINS | 33  | Up   | 0.632668361        | 0.837120696        |
| 3573 | HUMMEL_BURKITT'S_LYMPHOMA_UP                             | 39  | Up   | 0.633135689        | 0.837504516        |
| 3574 | BANDRES_RESPONSE_TO_CARMUSTIN_WITHOUT_MGMT_24HR_UP       | 10  | Down | 0.633316456        | 0.837509167        |
| 3575 | SCHAEFFER_PROSTATE_DEVELOPMENT_6HR_DN                    | 480 | Down | 0.63482999         | 0.839132663        |
| 3576 | SPIELMAN_LYMPHOBLAST_EUROPEAN_VS_ASIAN_UP                | 461 | Down | 0.634899317        | 0.839132663        |
| 3577 | HU_GENOTOXIN_ACTION_DIRECT_VS_INDIRECT_24HR              | 52  | Up   | 0.635539806        | 0.839693861        |
| 3578 | KYNG_WERNER_SYNDROME_UP                                  | 18  | Up   | 0.635679353        | 0.839693861        |
| 3579 | EPPERT_LSC_R                                             | 42  | Down | 0.636192988        | 0.840137471        |

|      | A                                                  | B   | C    | D           | E           |
|------|----------------------------------------------------|-----|------|-------------|-------------|
| 3580 | WANG_CLASSIC_ADIPOGENIC_TARGETS_OF_PPAR_G          | 16  | Up   | 0.636680094 | 0.840446938 |
| 3581 | GRAESSMANN_RESPONSE_TO_MC_AND_SERUM_DEPRIVATION_UP | 155 | Up   | 0.637076665 | 0.840446938 |
| 3582 | LEE_CALORIE_RESTRICTION_MUSCLE_DN                  | 43  | Down | 0.637095297 | 0.840446938 |
| 3583 | SCHLOSSER_MYC_TARGETS_REPRESSED_BY_SERUM           | 155 | Up   | 0.637138821 | 0.840446938 |
| 3584 | KORKOLA_EMBRYONIC_CARCINOMA_VS_SEMINOMA_DN         | 17  | Down | 0.63763548  | 0.840867329 |
| 3585 | REACTOME_P38MAPK_EVENTS                            | 13  | Down | 0.638100825 | 0.840991498 |
| 3586 | KHETCHOUMIAN_TRIM24_TARGETS_DN                     | 5   | Down | 0.638347774 | 0.840991498 |
| 3587 | BIOCARTA_TCR_PATHWAY                               | 36  | Up   | 0.638402155 | 0.840991498 |
| 3588 | ST_GAQ_PATHWAY                                     | 25  | Up   | 0.638441588 | 0.840991498 |
| 3589 | MEISSNER_BRAIN_HCP_WITH_H3K4ME2_AND_H3K27ME3       | 37  | Up   | 0.639034997 | 0.841458686 |
| 3590 | REACTOME_INNATE_IMMUNE_SYSTEM                      | 159 | Up   | 0.639280829 | 0.841458686 |
| 3591 | YAO_TEMPORAL_RESPONSE_TO_PROGESTERONE_CLUSTER_7    | 70  | Down | 0.639330515 | 0.841458686 |
| 3592 | VANDESLUIS_COMMD1_TARGETS_GROUP_3_DN               | 26  | Down | 0.640745254 | 0.84308586  |
| 3593 | MARTINELLI_IMMATURE_NEUTROPHIL_DN                  | 4   | Down | 0.641036645 | 0.843234451 |
| 3594 | WHITFIELD_CELL_CYCLE_G1_S                          | 133 | Up   | 0.641555877 | 0.843682583 |
| 3595 | BIOCARTA_WNT_PATHWAY                               | 25  | Down | 0.642030717 | 0.844072103 |
| 3596 | NIKOLSKY_BREAST_CANCER_21Q22_AMPLICON              | 15  | Down | 0.642416068 | 0.844343789 |
| 3597 | LOPEZ_EPITHELIOID_MESOTHELIOMA                     | 13  | Down | 0.642885447 | 0.844682921 |
| 3598 | DITTMER_PTHLH_TARGETS_DN                           | 68  | Up   | 0.643187897 | 0.844682921 |
| 3599 | CHIARADONNA_NEOPLASTIC_TRANSFORMATION_KRAS_UP      | 110 | Up   | 0.643210402 | 0.844682921 |
| 3600 | TOYOTA_TARGETS_OF_MIR34B_AND_MIR34C                | 432 | Down | 0.643425774 | 0.844730976 |
| 3601 | MYLLYKANGAS_AMPLIFICATION_HOT_SPOT_2               | 5   | Down | 0.643747136 | 0.844850677 |
| 3602 | IWANAGA_E2F1_TARGETS_NOT_INDUCED_BY_SERUM          | 6   | Up   | 0.643874559 | 0.844850677 |

|      | A                                                      | B          | C           | D                  | E                  |
|------|--------------------------------------------------------|------------|-------------|--------------------|--------------------|
| 3603 | BORCZUK_MALIGNANT_MESOTHELIOMA_UP                      | 300        | Down        | 0.644291109        | 0.845162545        |
| 3604 | PID_MYC_PATHWAY                                        | 24         | Down        | 0.64466233         | 0.84529135         |
| 3605 | LOPEZ_TRANSLATION_VIA_FN1_SIGNALING                    | 34         | Down        | 0.644747095        | 0.84529135         |
| 3606 | MCBRYAN_PUBERTAL_BREAST_5_6WK_DN                       | 121        | Down        | 0.645254985        | 0.845722554        |
| 3607 | STARK_HYPPOCAMPUS_22Q11_DELETION_DN                    | 19         | Down        | 0.645730974        | 0.846111717        |
| 3608 | TONG_INTERACT_WITH_PTTG1                               | 53         | Down        | 0.645917851        | 0.846121942        |
| 3609 | <b>RICKMAN_METASTASIS_DN</b>                           | <b>218</b> | <b>Down</b> | <b>0.646625567</b> | <b>0.846814247</b> |
| 3610 | DER_IFN_GAMMA_RESPONSE_DN                              | 10         | Up          | 6.47E-01           | 8.47E-01           |
| 3611 | STONER_ESOPHAGEAL_CARCINOGENESIS_UP                    | 34         | Up          | 6.47E-01           | 8.47E-01           |
| 3612 | HARRIS_BRAIN_CANCER_PROGENITORS                        | 28         | Down        | 0.647617934        | 0.847177468        |
| 3613 | KEGG_RETINOL_METABOLISM                                | 18         | Up          | 0.647620109        | 0.847177468        |
| 3614 | REACTOME_DOWNSTREAM_SIGNALING_OF_ACTIVATED_FGFR        | 82         | Down        | 0.647908252        | 0.847319814        |
| 3615 | ZHAN_MULTIPLE_MYELOMA_PR_DN                            | 37         | Down        | 0.648194612        | 0.847459751        |
| 3616 | REACTOME_PRESYNAPTIC_NICOTINIC_ACETYLCHOLINE_RECEPTORS | 5          | Down        | 0.648582978        | 0.847732938        |
| 3617 | SHIN_B_CELL_LYMPHOMA_CLUSTER_8                         | 27         | Up          | 0.648867296        | 0.847870014        |
| 3618 | RIZ_ERYTHROID_DIFFERENTIATION                          | 73         | Down        | 0.649383187        | 0.848309527        |
| 3619 | REACTOME_GLOBAL_GENOMIC_NER_GG_NER                     | 31         | Down        | 0.649968486        | 0.848839441        |
| 3620 | REACTOME_ACTIVATION_OF_RAC                             | 13         | Down        | 0.650376762        | 0.849137939        |
| 3621 | PID_P38_ALPHA_BETA_DOWNSTREAM_PATHWAY                  | 36         | Up          | 0.650939012        | 0.849515231        |
| 3622 | MOOTHA_GLYCOGEN_METABOLISM                             | 17         | Down        | 0.65119506         | 0.849515231        |
| 3623 | RICKMAN_TUMOR_DIFFERENTIATED_WELL_VS_POORLY_UP         | 221        | Down        | 0.651205115        | 0.849515231        |
| 3624 | PID_ARF6_TRAFFICKING_PATHWAY                           | 41         | Down        | 0.652046495        | 0.84978146         |
| 3625 | MCBRYAN_TERMINAL_END_BUD_UP                            | 10         | Down        | 0.652056619        | 0.84978146         |
| 3626 | LIM_MAMMARY_LUMINAL_MATURE_UP                          | 94         | Up          | 0.652115391        | 0.84978146         |
| 3627 | PID_P38_GAMMA_DELTA_PATHWAY                            | 11         | Up          | 0.652128587        | 0.84978146         |
| 3628 | SMID_BREAST_CANCER_RELAPSE_IN_BRAIN_UP                 | 24         | Down        | 0.652577737        | 0.849966174        |
| 3629 | KEGG_LONG_TERM_DEPRESSION                              | 54         | Down        | 0.652630112        | 0.849966174        |

|      | A                                             | B         | C         | D                  | E                  |
|------|-----------------------------------------------|-----------|-----------|--------------------|--------------------|
| 3630 | GOBERT_OLIGODENDROCYTE_DIFFERENTIATION_DN     | 1004      | Up        | 0.653496613        | 0.850860154        |
| 3631 | LIN_MELANOMA_COPY_NUMBER_DN                   | 38        | Up        | 0.654392376        | 0.851537056        |
| 3632 | REACTOME_SEMAPHORIN_INTERACTIONS              | 61        | Up        | 0.654398206        | 0.851537056        |
| 3633 | DELYS_THYROID_CANCER_DN                       | 179       | Up        | 0.654557162        | 0.851537056        |
| 3634 | OXFORD_RALA_OR_RALB_TARGETS_UP                | 47        | Down      | 0.655461866        | 0.852479305        |
| 3635 | GOLDRATH_IMMUNE_MEMORY                        | 57        | Up        | 0.656403253        | 0.853394162        |
| 3636 | NICK_RESPONSE_TO_PROC_TREATMENT_UP            | 4         | Down      | 0.656684691        | 0.853394162        |
| 3637 | REACTOME_GLUONEOGENESIS                       | 25        | Down      | 0.656707127        | 0.853394162        |
| 3638 | ROVERSI_GLIOMA_LOH_REGIONS                    | 31        | Down      | 0.656948302        | 0.853472842        |
| 3639 | KASLER_HDAC7_TARGETS_1_UP                     | 166       | Down      | 0.657138092        | 0.853484741        |
| 3640 | BIOCARTA_PARKIN_PATHWAY                       | 12        | Up        | 0.658693605        | 0.855265945        |
| 3641 | BAKKER_FOXO3_TARGETS_UP                       | 55        | Up        | 0.658871543        | 0.855265945        |
| 3642 | BIOCARTA_ATM_PATHWAY                          | 20        | Up        | 0.659508421        | 0.855852695        |
| 3643 | BIOCARTA_BLYMPHOCYTE_PATHWAY                  | 5         | Up        | 0.659860084        | 0.855852695        |
| 3644 | XU_GH1_EXOGENOUS_TARGETS_DN                   | 86        | Up        | 0.659878017        | 0.855852695        |
| 3645 | PETROVA_ENDOTHELIUM_LYMPHATIC_VS_BLOOD_UP     | 109       | Up        | 0.660312295        | 0.855852695        |
| 3646 | REACTOME_S_PHASE                              | 105       | Up        | 0.660543611        | 0.855852695        |
| 3647 | STEIN_ESTROGEN_RESPONSE_NOT_VIA_ESRRA         | 17        | Up        | 0.660554454        | 0.855852695        |
| 3648 | REACTOME_APOPTOTIC_EXECUTION_PHASE            | 44        | Up        | 0.660591488        | 0.855852695        |
| 3649 | CHARAFE_BREAST_CANCER_BASAL_VS_MESENCHYMAL_UP | 98        | Down      | 0.66134738         | 0.856597141        |
| 3650 | <b>WANG_BARRETTES_ESOPHAGUS_UP</b>            | <b>35</b> | <b>Up</b> | <b>0.661735517</b> | <b>0.856864982</b> |
| 3651 | SARRIO_EPITHELIAL_MESENCHYMAL_TRANSITION_UP   | 167       | Down      | 6.62E-01           | 8.57E-01           |
| 3652 | REACTOME_ACTIVATED_TLR4_SIGNALING             | 79        | Up        | 6.62E-01           | 8.57E-01           |
| 3653 | BIOCARTA_ETC_PATHWAY                          | 12        | Up        | 0.662685198        | 0.857389803        |
| 3654 | STEGMEIER_PRE-MITOTIC_CELL_CYCLE_REGULATORS   | 10        | Up        | 0.663295147        | 0.857944038        |
| 3655 | PID_ER_NONGENOMIC_PATHWAY                     | 37        | Up        | 0.664470038        | 0.858855098        |

|      | A                                                             | B   | C    | D           | E           |
|------|---------------------------------------------------------------|-----|------|-------------|-------------|
| 3656 | REACTOME_GASTRIN_CREB_SIGNALLING_PATH<br>WAY_VIA_PKC_AND_MAPK | 105 | Down | 0.664492982 | 0.858855098 |
| 3657 | TOMIDA_LUNG_CANCER_POOR_SURVIVAL                              | 3   | Up   | 0.664599605 | 0.858855098 |
| 3658 | LI_AMPLIFIED_IN_LUNG_CANCER                                   | 155 | Down | 0.664796984 | 0.858855098 |
| 3659 | AMBROSINI_FLAVOPIRIDOL_TREATMENT_TP53                         | 96  | Up   | 0.664908349 | 0.858855098 |
| 3660 | VART_KSHV_INFECTION_ANGIOGENIC_MARKERS<br>_DN                 | 102 | Down | 0.665216902 | 0.859009512 |
| 3661 | ZHANG_RESPONSE_TO_CANTHARIDIN_DN                              | 67  | Down | 0.665391495 | 0.859009512 |
| 3662 | DONATO_CELL_CYCLE_TRETINOIN                                   | 6   | Down | 0.66601565  | 0.859580428 |
| 3663 | KEGG_FC_GAMMA_R_MEDIATED_PHAGOCYTOSIS                         | 81  | Down | 0.666264012 | 0.859666154 |
| 3664 | YAO_TEMPORAL_RESPONSE_TO_PROGESTERON<br>E_CLUSTER_14          | 141 | Down | 0.666787993 | 0.860107362 |
| 3665 | ONO_FOXP3_TARGETS_DN                                          | 22  | Down | 0.667027937 | 0.860182043 |
| 3666 | LI_CYTIDINE_ANALOGS_CYCOTOXICITY                              | 14  | Up   | 0.667486748 | 0.860517837 |
| 3667 | MOREIRA_RESPONSE_TO_TSA_DN                                    | 10  | Down | 0.66765257  | 0.860517837 |
| 3668 | GAZDA_DIAMOND_BLACKFAN_ANEMIA_PROGENI<br>TOR_DN               | 65  | Up   | 0.668117087 | 0.860881712 |
| 3669 | RAY_TARGETS_OF_P210_BCR_ABL_FUSION_DN                         | 14  | Down | 0.668861135 | 0.86160547  |
| 3670 | WENDT_COHESIN_TARGETS_UP                                      | 33  | Up   | 0.669446907 | 0.86197641  |
| 3671 | CHANDRAN_METASTASIS_UP                                        | 192 | Down | 0.669586598 | 0.86197641  |
| 3672 | MYLLYKANGAS_AMPLIFICATION_HOT_SPOT_27                         | 9   | Down | 0.669696381 | 0.86197641  |
| 3673 | TESAR_ALK_TARGETS_HUMAN_ES_5D_DN                              | 7   | Up   | 0.670160186 | 0.862086876 |
| 3674 | DAWSON_METHYLATED_IN_LYMPHOMA_TCL1                            | 42  | Up   | 0.670425033 | 0.862086876 |
| 3675 | BERNARD_PPAPDC1B_TARGETS_DN                                   | 48  | Up   | 0.670685598 | 0.862086876 |
| 3676 | SU_PANCREAS                                                   | 30  | Down | 0.670844986 | 0.862086876 |
| 3677 | GALLUZZI_PREVENT_MITOCHONDIAL_PERMEABIL<br>IZATION            | 22  | Up   | 0.670935728 | 0.862086876 |
| 3678 | GAZDA_DIAMOND_BLACKFAN_ANEMIA_ERYTHR<br>OID_DN                | 428 | Up   | 0.67125086  | 0.862086876 |
| 3679 | REACTOME_Glutamate_NEUROTRANSMITTER_<br>RELEASE_CYCLE         | 13  | Down | 0.671266364 | 0.862086876 |



|      | A                                                         | B         | C         | D                  | E                  |
|------|-----------------------------------------------------------|-----------|-----------|--------------------|--------------------|
| 3680 | SANSOM_APC_TARGETS_UP                                     | 104       | Up        | 0.671354251        | 0.862086876        |
| 3681 | MIKKELSEN_ES_HCP_WITH_H3_UNMETHYLATED                     | 23        | Down      | 0.671424276        | 0.862086876        |
| 3682 | ZHAN_MULTIPLE_MYELOMA_CD1_AND_CD2_UP                      | 79        | Up        | 0.671974874        | 0.862413463        |
| 3683 | KEGG_MELANOMA                                             | 53        | Up        | 0.672043676        | 0.862413463        |
| 3684 | REACTOME_AMINE_DERIVED_HORMONES                           | 3         | Down      | 0.672372187        | 0.86243456         |
| 3685 | HERNANDEZ_MITOTIC_ARREST_BY_DOCETAXEL_1_DN                | 34        | Up        | 0.672425168        | 0.86243456         |
| 3686 | HEIDENBLAD_AMPLIFIED_IN_PANCREATIC_CANCER                 | 30        | Up        | 0.672922731        | 0.862575669        |
| 3687 | MATZUK_CUMULUS_EXPANSION                                  | 4         | Up        | 0.672924445        | 0.862575669        |
| 3688 | MATZUK_MATERNAL_EFFECT                                    | 3         | Down      | 0.673082855        | 0.862575669        |
| 3689 | RIGGI_EWING_SARCOMA_PROGENITOR_DN                         | 143       | Down      | 0.673388048        | 0.862732789        |
| 3690 | SHANK_TAL1_TARGETS_DN                                     | 5         | Up        | 0.673581968        | 0.862747302        |
| 3691 | <b>BIOCARTA_CDC42RAC_PATHWAY</b>                          | <b>16</b> | <b>Up</b> | <b>0.673951491</b> | <b>0.862913472</b> |
| 3692 | ZHENG_FOXP3_TARGETS_DN                                    | 4         | Up        | 6.74E-01           | 8.63E-01           |
| 3693 | KORKOLA_CHORIOCARCINOMA_UP                                | 6         | Up        | 6.75E-01           | 8.63E-01           |
| 3694 | ROESSLER_LIVER_CANCER_METASTASIS_UP                       | 87        | Up        | 0.674942305        | 0.863318964        |
| 3695 | KEGG_PATHWAYS_IN_CANCER                                   | 268       | Down      | 0.675058849        | 0.863318964        |
| 3696 | REACTOME_PURINE_RIBONUCLEOSIDE_MONOPHOSPHATE_BIOSYNTHESIS | 11        | Down      | 0.675124566        | 0.863318964        |
| 3697 | REACTOME_HEPARAN_SULFATE_HEPARIN_HSGAG_METABOLISM         | 44        | Down      | 0.675822317        | 0.863458109        |
| 3698 | ZHONG_RESPONSE_TO_AZACITIDINE_AND_TSA_DN                  | 68        | Up        | 0.675844522        | 0.863458109        |
| 3699 | ABDELMOHSEN_ELAVL4_TARGETS                                | 16        | Up        | 0.676034306        | 0.863458109        |
| 3700 | REACTOME_REGULATION_OF_ORNITHINE_DECARBOXYLASE_ODC        | 46        | Up        | 0.676275086        | 0.863458109        |
| 3701 | ROVERSI_GLIOMA_COPY_NUMBER_UP                             | 80        | Down      | 0.676313713        | 0.863458109        |
| 3702 | NIELSEN_LEIOMYOSARCOMA_CNN1_DN                            | 20        | Up        | 0.676502196        | 0.863458109        |
| 3703 | BOYLAN_MULTIPLE_MYELOMA_PCA1_UP                           | 55        | Up        | 0.676512575        | 0.863458109        |
| 3704 | REACTOME_GENERATION_OF_SECOND_MESSENGER_MOLECULES         | 12        | Down      | 0.677261565        | 0.864043726        |

|      | A                                                | B    | C    | D           | E           |
|------|--------------------------------------------------|------|------|-------------|-------------|
| 3705 | BARRIER_COLON_CANCER_RECURRENCE_UP               | 37   | Down | 0.677646036 | 0.864043726 |
| 3706 | LUCAS_HNF4A_TARGETS_DN                           | 7    | Down | 0.678383863 | 0.864043726 |
| 3707 | GRAESSMANN_APOPTOSIS_BY_SERUM_DEPRIVATION_DN     | 202  | Up   | 0.678429134 | 0.864043726 |
| 3708 | SUZUKI_RESPONSE_TO_TSA                           | 14   | Down | 0.678535192 | 0.864043726 |
| 3709 | LIM_MAMMARY_LUMINAL_PROGENITOR_DN                | 12   | Up   | 0.67854572  | 0.864043726 |
| 3710 | ABDULRAHMAN_KIDNEY_CANCER_VHL_DN                 | 10   | Up   | 0.67857018  | 0.864043726 |
| 3711 | ZHANG_RESPONSE_TO_IKK_INHIBITOR_AND_TNF_DN       | 94   | Up   | 0.678604671 | 0.864043726 |
| 3712 | PID_PI3K_PLK_TRK_PATHWAY                         | 32   | Up   | 0.678721518 | 0.864043726 |
| 3713 | REACTOME_SPRY_REGULATION_OF_FGF_SIGNALING        | 13   | Down | 0.678800066 | 0.864043726 |
| 3714 | REACTOME_REGULATION_OF_COMPLEMENT_CASCADE        | 6    | Up   | 0.679517027 | 0.864141669 |
| 3715 | REACTOME_SIGNALING_BY_NOTCH3                     | 11   | Up   | 0.679886114 | 0.864141669 |
| 3716 | BIOCARTA_KREB_PATHWAY                            | 8    | Up   | 0.679921691 | 0.864141669 |
| 3717 | INAMURA_LUNG_CANCER_SCC_SUBTYPES_UP              | 14   | Down | 0.679934478 | 0.864141669 |
| 3718 | NEMETH_INFLAMMATORY_RESPONSE_LPS_DN              | 28   | Down | 0.679968796 | 0.864141669 |
| 3719 | OHM_EMBRYONIC_CARCINOMA_DN                       | 5    | Up   | 0.680097533 | 0.864141669 |
| 3720 | DANG_BOUND_BY_MYC                                | 1004 | Up   | 0.680308227 | 0.864141669 |
| 3721 | TCGA_GLIOMASTOMA_COPY_NUMBER_UP                  | 64   | Up   | 0.680340108 | 0.864141669 |
| 3722 | REACTOME_ADG_SIGNALLING_THROUGH_P2RY1            | 20   | Up   | 0.680976792 | 0.86471791  |
| 3723 | HAHTOLA_MYCOSIS_FUNGOIDES_DN                     | 10   | Up   | 0.681196523 | 0.864764527 |
| 3724 | REACTOME_DOWNREGULATION_OF_ERBB2_ERBB3_SIGNALING | 10   | Up   | 0.681397617 | 0.86477202  |
| 3725 | REACTOME_G2_M_CHECKPOINTS                        | 40   | Up   | 0.681568466 | 0.86477202  |
| 3726 | KINSEY_TARGETS_OF_EWSR1_FLII_FUSION_UP           | 1229 | Down | 0.682146744 | 0.865273387 |
| 3727 | VALK_AML_WITH_EVI1                               | 19   | Up   | 0.682674293 | 0.865710155 |
| 3728 | POOLA_INVASIVE_BREAST_CANCER_DN                  | 97   | Up   | 0.683374048 | 0.86626486  |
| 3729 | MEISSNER_ES_ICP_WITH_H3K4ME3                     | 30   | Down | 0.683512759 | 0.86626486  |

|      | A                                                             | B         | C           | D                  | E                  |
|------|---------------------------------------------------------------|-----------|-------------|--------------------|--------------------|
| 3730 | REACTOME_TRANSLOCATION_OF_ZAP_70_TO_I<br>MMUNOLOGICAL_SYNAPSE | 5         | Down        | 0.683931404        | 0.86626486         |
| 3731 | GAUSSMANN_MLL_AF4_FUSION_TARGETS_C_UP                         | 150       | Up          | 0.684187755        | 0.86626486         |
| 3732 | <b>REACTOME_ELEVATION_OF_CYTOSOLIC_CA2_LEV<br/>ELS</b>        | <b>4</b>  | <b>Up</b>   | <b>0.684195929</b> | <b>0.86626486</b>  |
| 3733 | BURTON_ADIPOGENESIS_11                                        | 52        | Up          | 6.84E-01           | 8.66E-01           |
| 3734 | REACTOME_PI3K_EVENTS_IN_ERBB2_SIGNALING                       | 38        | Up          | 6.84E-01           | 8.66E-01           |
| 3735 | BOHN_PRIMARY_IMMUNODEFICIENCY_SYNDRO<br>M_UP                  | 45        | Up          | 0.685014758        | 0.866632979        |
| 3736 | REACTOME_THE_ACTIVATION_OF_ARYLSULFATA<br>SES                 | 10        | Up          | 0.685052735        | 0.866632979        |
| 3737 | MIKHAYLOVA_OXIDATIVE_STRESS_RESPONSE_VI<br>A_VHL_UP           | 7         | Down        | 0.685573512        | 0.867059648        |
| 3738 | REACTOME_SIGNALING_BY_TGF_BETA_RECEPTO<br>R_COMPLEX           | 60        | Up          | 0.687034435        | 0.868526429        |
| 3739 | <b>REACTOME_EXTENSION_OF_TELOMERES</b>                        | <b>27</b> | <b>Down</b> | <b>0.687100908</b> | <b>0.868526429</b> |
| 3740 | KEGG_CYSTEINE_AND_METHIONINE_METABOLIS<br>M                   | 27        | Up          | 0.68787643         | 0.869274173        |
| 3741 | KEGG_LONG_TERM_POTENTIATION                                   | 60        | Down        | 0.688131701        | 0.869364248        |
| 3742 | REACTOME_SEROTONIN_RECEPTORS                                  | 6         | Down        | 0.688923679        | 0.870132153        |
| 3743 | BIOCARTA_AKAP13_PATHWAY                                       | 11        | Up          | 0.689621058        | 0.870417447        |
| 3744 | KUMAR_PATHOGEN_LOAD_BY_MACROPHAGES                            | 215       | Up          | 0.690022091        | 0.870417447        |
| 3745 | REACTOME_TRAFFICKING_OF_GLUR2_CONTAINI<br>NG_AMPA_RECEPTORS   | 14        | Down        | 0.690102404        | 0.870417447        |
| 3746 | RODRIGUES_THYROID_CARCINOMA_POORLY_DIF<br>FERENTIATED_DN      | 745       | Up          | 0.690299778        | 0.870417447        |
| 3747 | ZHENG_FOXP3_TARGETS_UP                                        | 23        | Up          | 0.690375028        | 0.870417447        |
| 3748 | GALI_TP53_TARGETS_APOPTOTIC_DN                                | 6         | Up          | 0.690405461        | 0.870417447        |
| 3749 | LI_WILMS_TUMOR_VS_FETAL_KIDNEY_2_UP                           | 25        | Down        | 0.690439067        | 0.870417447        |

|      | A                                                      | B   | C    | D           | E           |
|------|--------------------------------------------------------|-----|------|-------------|-------------|
| 3750 | WANG_PROSTATE_CANCER_ANDROGEN_INDEPENDENT              | 54  | Up   | 0.690693442 | 0.870505871 |
| 3751 | PID_IL23_PATHWAY                                       | 16  | Up   | 0.691291089 | 0.87100755  |
| 3752 | AIGNER_ZEB1_TARGETS                                    | 32  | Up   | 0.691643366 | 0.87100755  |
| 3753 | HOELZEL_NF1_TARGETS_DN                                 | 94  | Down | 0.691792665 | 0.87100755  |
| 3754 | MYLLYKANGAS_AMPLIFICATION_HOT_SPOT_23                  | 15  | Up   | 0.691828854 | 0.87100755  |
| 3755 | DOANE_RESPONSE_TO_ANDROGEN_UP                          | 151 | Up   | 0.692375336 | 0.871304995 |
| 3756 | CALVET_IRINOTECAN_SENSITIVE_VS_RESISTANT_UP            | 4   | Up   | 0.692477209 | 0.871304995 |
| 3757 | SIG_BCR_SIGNALING_PATHWAY                              | 41  | Up   | 0.692656696 | 0.871304995 |
| 3758 | SCHUHMACHER_MYC_TARGETS_UP                             | 80  | Up   | 0.692873823 | 0.871304995 |
| 3759 | REACTOME_DOWNSTREAM_SIGNAL_TRANSDUCTION                | 87  | Up   | 0.692987126 | 0.871304995 |
| 3760 | MIKKELSEN_MCV6_LCP_WITH_H3K27ME3                       | 7   | Down | 0.693305493 | 0.871473385 |
| 3761 | FIGUEROA_AML_METHYLATION_CLUSTER_7_DN                  | 5   | Up   | 0.694625659 | 0.872900596 |
| 3762 | OZEN_MIR125B1_TARGETS                                  | 25  | Down | 0.694998308 | 0.873043296 |
| 3763 | VALK_AML_CLUSTER_9                                     | 25  | Up   | 0.695108757 | 0.873043296 |
| 3764 | SASAKI_TARGETS_OF_TP73_AND_TP63                        | 10  | Up   | 0.69555827  | 0.873149473 |
| 3765 | SCHOEN_NFKB_SIGNALING                                  | 25  | Down | 0.695562882 | 0.873149473 |
| 3766 | AGUIRRE_PANCREATIC_CANCER_COPY_NUMBER_DN               | 224 | Up   | 0.696157844 | 0.873536832 |
| 3767 | DAIRKEE_TERT_TARGETS_DN                                | 108 | Up   | 0.696241209 | 0.873536832 |
| 3768 | GU_PDEF_TARGETS_DN                                     | 24  | Down | 0.696560475 | 0.873705401 |
| 3769 | KYNG_ENVIRONMENTAL_STRESS_RESPONSE_DN                  | 19  | Up   | 0.697102742 | 0.873855997 |
| 3770 | REACTOME_YAP1_AND_WWTR1_TAZ_STIMULATED_GENE_EXPRESSION | 22  | Up   | 0.697154681 | 0.873855997 |
| 3771 | PID_IL2_1PATHWAY                                       | 49  | Up   | 0.697235367 | 0.873855997 |
| 3772 | VERRECCHIA_RESPONSE_TO_TGFB1_C5                        | 20  | Down | 0.699411568 | 0.87635101  |
| 3773 | WANG_BARRETTES_ESOPHAGUS_AND_ESOPHAGUS_CANCER_DN       | 21  | Up   | 0.69960942  | 0.876366519 |

|      | A                                                           | B   | C    | D           | E           |
|------|-------------------------------------------------------------|-----|------|-------------|-------------|
| 3774 | BURTON_ADIPOGENESIS_PEAK_AT_16HR                            | 38  | Up   | 7.00E-01    | 8.76E-01    |
| 3775 | JOHANSSON_BRAIN_CANCER_EARLY_VS_LATE_U<br>P                 | 6   | Up   | 7.01E-01    | 8.77E-01    |
| 3776 | LIU_CMYB_TARGETS_DN                                         | 6   | Up   | 0.701452988 | 0.877779116 |
| 3777 | REACTOME_DIGESTION_OF_DIETARY_CARBOHYD<br>RATE              | 1   | Down | 0.7014802   | 0.877779116 |
| 3778 | TURJANSKI_MAPK1_AND_MAPK2_TARGETS                           | 12  | Down | 0.701828197 | 0.877906743 |
| 3779 | KYNG_DNA_DAMAGE_BY_4NQO_OR_UV                               | 53  | Up   | 0.702121232 | 0.877906743 |
| 3780 | REACTOME_MYD88_MAL_CASCADE_INITIATED_O<br>N_PLASMA_MEMBRANE | 71  | Up   | 0.702139594 | 0.877906743 |
| 3781 | BIOCARTA_NTHI_PATHWAY                                       | 21  | Up   | 0.702564511 | 0.878205638 |
| 3782 | REACTOME_CELL_CELL_COMMUNICATION                            | 94  | Up   | 0.70284854  | 0.878328313 |
| 3783 | MARTINEZ_RESPONSE_TO TRABECTEDIN                            | 49  | Down | 0.703378112 | 0.878757689 |
| 3784 | BLALOCK_ALZHEIMERS_DISEASE_INCIPENT_DN                      | 151 | Down | 0.704076432 | 0.879187705 |
| 3785 | REACTOME_SIGNALING_BY_ILS                                   | 84  | Up   | 0.704190551 | 0.879187705 |
| 3786 | ROME_INSULIN_TARGETS_IN_MUSCLE_DN                           | 151 | Up   | 0.704280521 | 0.879187705 |
| 3787 | CAFFAREL_RESPONSE_TO_THC_8HR_3_UP                           | 5   | Up   | 0.704587867 | 0.879339058 |
| 3788 | REACTOME_HYALURONAN_UPTAKE_AND_DEGRA<br>DATION              | 8   | Up   | 0.704779373 | 0.879345798 |
| 3789 | RICKMAN_METASTASIS_UP                                       | 336 | Up   | 0.705064373 | 0.879469156 |
| 3790 | MIKKELSEN_NPC_HCP_WITH_H3K27ME3                             | 190 | Down | 0.705305529 | 0.879537773 |
| 3791 | GOLDRATH_HOMEOSTATIC_PROLIFERATION                          | 165 | Up   | 0.705543124 | 0.879601916 |
| 3792 | KEGG_PENTOSE_PHOSPHATE_PATHWAY                              | 22  | Down | 0.705745657 | 0.879622324 |
| 3793 | NIKOLSKY_BREAST_CANCER_8P12_P11_AMPLICO<br>N                | 41  | Down | 0.706093523 | 0.879659382 |
| 3794 | REACTOME_VOLTAGE_GATED_POTASSIUM_CHA<br>NNELS               | 23  | Down | 0.706147732 | 0.879659382 |
| 3795 | REACTOME_P2Y_RECEPTORS                                      | 5   | Down | 0.70657194  | 0.879955829 |
| 3796 | MURAKAMI_UV_RESPONSE_1HR_DN                                 | 6   | Down | 0.706932746 | 0.880076949 |
| 3797 | CHESLER_BRAIN_HIGHEST_GENETIC_VARIANCE                      | 30  | Up   | 0.707041714 | 0.880076949 |
| 3798 | BOYERINAS_ONCOFETAL_TARGETS_OF_LET7A1                       | 12  | Up   | 0.708411053 | 0.88130396  |

|      | A                                                                             | B         | C         | D                 | E                 |
|------|-------------------------------------------------------------------------------|-----------|-----------|-------------------|-------------------|
| 3799 | EBAUER_TARGETS_OF_PAX3_FOXO1_FUSION_D<br>N                                    | 42        | Down      | 0.708681084       | 0.88130396        |
| 3800 | REACTOME_G1_S_SPECIFIC_TRANSCRIPTION                                          | 17        | Up        | 0.708771137       | 0.88130396        |
| 3801 | BIOCARTA_NEUROTRANSMITTERS_PATHWAY                                            | 1         | Down      | 0.708773555       | 0.88130396        |
| 3802 | REACTOME_HORMONE_SENSITIVE_LIPASE_HSL_<br>MEDIATED_TRIACYLGLYCEROL_HYDROLYSIS | 8         | Up        | 0.709398069       | 0.881723711       |
| 3803 | MARIADASON_REGULATED_BY_HISTONE_ACETYLA<br>TION_UP                            | 75        | Down      | 0.709484349       | 0.881723711       |
| 3804 | KEGG_NUCLEOTIDE_EXCISION_REPAIR                                               | 42        | Down      | 0.709990935       | 0.882121264       |
| 3805 | IIZUKA_LIVER_CANCER_PROGRESSION_G2_G3_D<br>N                                  | 9         | Down      | 0.71042232        | 0.8824252         |
| 3806 | BANDRES_RESPONSE_TO_CARMUSTIN_MGMT_4<br>8HR_UP                                | 13        | Up        | 0.710646946       | 0.882447521       |
| 3807 | HOLLEMAN_ASPARAGINASE_RESISTANCE_ALL_U<br>P                                   | 21        | Down      | 0.710901403       | 0.882447521       |
| 3808 | ST_B_CELL_ANTIGEN_RECEPTOR                                                    | 35        | Up        | 0.711000574       | 0.882447521       |
| 3809 | KANG_IMMORTALIZED_BY_TERT_DN                                                  | 63        | Down      | 0.711811142       | 0.883216196       |
| 3810 | CHANG_IMMORTALIZED_BY_HP31_UP                                                 | 62        | Up        | 0.712308242       | 0.883216196       |
| 3811 | REACTOME_SIGNAL_TRANSDUCTION_BY_L1                                            | 33        | Up        | 0.712458409       | 0.883216196       |
| 3812 | LANDIS_BREAST_CANCER_PROGRESSION_DN                                           | 57        | Up        | 0.712501528       | 0.883216196       |
| 3813 | TESAR_ALK_AND_JAK_TARGETS_MOUSE_ES_D4_<br>DN                                  | 6         | Down      | 0.712554527       | 0.883216196       |
| 3814 | <b>BIOCARTA_ERK_PATHWAY</b>                                                   | <b>26</b> | <b>Up</b> | <b>0.71339194</b> | <b>0.88402227</b> |
| 3815 | NIELSEN_MALIGNAT_FIBROUS_HISTIOCYTOMA_<br>UP                                  | 14        | Up        | 7.14E-01          | 8.85E-01          |
| 3816 | MILICIC_FAMILIAL_ADENOMATOUS_POLYPOSIS_<br>UP                                 | 6         | Down      | 7.15E-01          | 8.86E-01          |
| 3817 | REACTOME_INSULIN_RECEPTOR_SIGNALLING_CA<br>SCADE                              | 68        | Up        | 0.715423588       | 0.885842885       |
| 3818 | STONER_ESOPHAGEAL_CARCINOGENESIS_DN                                           | 7         | Up        | 0.715731106       | 0.88599148        |
| 3819 | AMIT_SERUM_RESPONSE_480_MCF10A                                                | 30        | Up        | 0.716773116       | 0.887048971       |
| 3820 | PID_LIS1_PATHWAY                                                              | 26        | Up        | 0.717419855       | 0.887577799       |

|      | A                                                                          | B   | C    | D           | E           |
|------|----------------------------------------------------------------------------|-----|------|-------------|-------------|
| 3821 | BIOCARTA_MONOCYTE_PATHWAY                                                  | 5   | Up   | 0.71775516  | 0.887577799 |
| 3822 | REACTOME_SEMA3A_PLEXIN_REPULSION_SIGNALING_BY_INHIBITING_INTEGRIN_ADHESION | 13  | Down | 0.717763972 | 0.887577799 |
| 3823 | RUNNE_GENDER_EFFECT_UP                                                     | 1   | Down | 0.718161805 | 0.887724592 |
| 3824 | THEILGAARD_NEUTROPHIL_AT_SKIN_WOUND_DN                                     | 204 | Down | 0.718258437 | 0.887724592 |
| 3825 | WARTERS_RESPONSE_TO_IR_SKIN                                                | 70  | Up   | 0.718492268 | 0.887781372 |
| 3826 | CHEMELLO_SOLEUS_VS_EDL_MYOFIBERS_DN                                        | 14  | Up   | 0.719026391 | 0.888209071 |
| 3827 | REACTOME_TRANSMISSION_ACROSS_CHEMICAL_SYNAPSES                             | 143 | Down | 0.720273596 | 0.889245586 |
| 3828 | WANG_TUMOR_INVASIVENESS_DN                                                 | 202 | Up   | 0.720298994 | 0.889245586 |
| 3829 | YOKOE_CANCER_TESTIS_ANTIGENS                                               | 29  | Up   | 0.720464505 | 0.889245586 |
| 3830 | REACTOME_PURINE_SALVAGE                                                    | 12  | Up   | 0.720618275 | 0.889245586 |
| 3831 | STEIN_ESRRA_TARGETS_UP                                                     | 376 | Up   | 0.721355047 | 0.889275187 |
| 3832 | BHATI_G2M_ARREST_BY_2METHOXYESTRADIOL_UP                                   | 102 | Up   | 0.721374538 | 0.889275187 |
| 3833 | SAKAI_CHRONIC_HEPATITIS_VS_LIVER_CANCER_UP                                 | 75  | Down | 0.721476888 | 0.889275187 |
| 3834 | REACTOME_GLUCOSE_METABOLISM                                                | 56  | Up   | 0.721522088 | 0.889275187 |
| 3835 | GRADE_COLON_VS_RECTAL_CANCER_DN                                            | 47  | Up   | 0.721583294 | 0.889275187 |
| 3836 | GARGALOVIC_RESPONSE_TO_OXIDIZED_PHOSPHOLIPIDS_GREY_DN                      | 58  | Down | 0.72187997  | 0.889408828 |
| 3837 | REACTOME_CROSS_PRESENTATION_OF_SOLUBLE_EXOGENOUS_ANTIGENS_ENDOSOMES        | 43  | Down | 0.7227686   | 0.890271542 |
| 3838 | TOMIDA_METASTASIS_UP                                                       | 22  | Up   | 0.723226594 | 0.890376659 |
| 3839 | FERRANDO_T_ALL_WITH_MLL_ENL_FUSION_DN                                      | 77  | Up   | 0.723230819 | 0.890376659 |
| 3840 | REACTOME_TOLL_RECEPTOR_CASCADES                                            | 94  | Up   | 0.723467119 | 0.890435566 |
| 3841 | WINNEPENNINGX_MELANOMA_METASTASIS_DN                                       | 26  | Down | 0.723801965 | 0.890615699 |
| 3842 | HAHTOLA_CTCL_PATHOGENESIS                                                  | 5   | Up   | 0.724526111 | 0.891274635 |
| 3843 | ZEILSTRA_CD44_TARGETS_UP                                                   | 5   | Up   | 0.72499102  | 0.891392858 |

|      | A                                                 | B         | C           | D                 | E                  |
|------|---------------------------------------------------|-----------|-------------|-------------------|--------------------|
| 3844 | REACTOME_IL_7_SIGNALING                           | 6         | Down        | 0.725022173       | 0.891392858        |
| 3845 | REACTOME_SYNTHESIS_OF_DNA                         | 89        | Down        | 0.725188179       | 0.891392858        |
| 3846 | DOUGLAS_BMI1_TARGETS_UP                           | 526       | Up          | 0.725459108       | 0.891440838        |
| 3847 | HUI_MAPK14_TARGETS_UP                             | 17        | Up          | 0.725695844       | 0.891440838        |
| 3848 | RODRIGUES_NTN1_TARGETS_UP                         | 16        | Down        | 0.725793207       | 0.891440838        |
| 3849 | CESLER_BRAIN_D6MIT150_QTL_TRANS                   | 3         | Down        | 0.726478737       | 0.892050944        |
| 3850 | REACTOME_METABOLISM_OF_CARBOHYDRATES              | 194       | Down        | 0.72709684        | 0.892384241        |
| 3851 | MEISSNER_BRAIN_HCP_WITH_H3_UNMETHYLATE<br>D       | 14        | Down        | 0.7271279         | 0.892384241        |
| 3852 | KAUFFMANN_MELANOMA_RELAPSE_DN                     | 6         | Up          | 0.727407506       | 0.892482794        |
| 3853 | MYLLYKANGAS_AMPLIFICATION_HOT_SPOT_25             | 5         | Up          | 0.727585973       | 0.892482794        |
| 3854 | IWANAGA_CARCIANOGENESIS_BY_KRAS_PTEN_D<br>N       | 283       | Up          | 0.728418656       | 0.89251874         |
| 3855 | <b>JOHANSSON_GLIOMAGENESIS_BY_PDGFBN_DN</b>       | <b>18</b> | <b>Down</b> | <b>0.72847275</b> | <b>0.89251874</b>  |
| 3856 | NIKOLSKY_BREAST_CANCER_15Q26_AMPLICON             | 18        | Up          | 7.28E-01          | 8.93E-01           |
| 3857 | HSIAO_HOUSEKEEPING_GENES                          | 378       | Down        | 7.29E-01          | 8.93E-01           |
| 3858 | BONCI_TARGETS_OF_MIR15A_AND_MIR16_1               | 83        | Down        | 0.728559742       | 0.89251874         |
| 3859 | BYSTRYKH_HEMATOPOIESIS_STEM_CELL_RUNX1            | 5         | Up          | 0.728953003       | 0.892769036        |
| 3860 | KANNAN_TP53_TARGETS_UP                            | 56        | Up          | 0.729349056       | 0.89302262         |
| 3861 | REACTOME_MAP_KINASE_ACTIVATION_IN_TLR_C<br>ASCAD  | 48        | Up          | 0.729556893       | 0.893045678        |
| 3862 | <b>REACTOME_ION_CHANNEL_TRANSPORT</b>             | <b>38</b> | <b>Down</b> | <b>0.72998759</b> | <b>0.893298048</b> |
| 3863 | GENTILE_UV_RESPONSE_CLUSTER_D4                    | 53        | Up          | 0.730390985       | 0.893298048        |
| 3864 | KORKOLA_EMBRYONAL_CARCINOMA_UP                    | 38        | Up          | 0.7304338         | 0.893298048        |
| 3865 | WORSCHER_TUMOR_EVASION_AND_TOLERANCE<br>NICITY_DN | 10        | Up          | 0.730519293       | 0.893298048        |
| 3866 | REACTOME_PLATELET_AGGREGATION_PLUG_FO<br>RMATION  | 24        | Down        | 0.730983271       | 0.893634141        |
| 3867 | BIOCARTA_IGF1MTOR_PATHWAY                         | 19        | Up          | 0.731368906       | 0.89387431         |



|      | A                                                     | B   | C    | D           | E           |
|------|-------------------------------------------------------|-----|------|-------------|-------------|
| 3868 | KEGG_TAURINE_AND_HYPOTAURINE_METABOLISM               | 5   | Up   | 0.731894605 | 0.894222553 |
| 3869 | STEARMAN_LUNG_CANCER_EARLY_VS_LATE_UP                 | 118 | Up   | 0.732219494 | 0.894222553 |
| 3870 | GROSS_HYPOXIA_VIA_ELK3_AND_HIF1A_DN                   | 96  | Down | 0.732306615 | 0.894222553 |
| 3871 | WANG_IMMORTALIZED_BY_HOXA9_AND_MEIS1_UP               | 19  | Up   | 0.732595539 | 0.894222553 |
| 3872 | JOHNSTONE_PARVB_TARGETS_3_DN                          | 885 | Up   | 0.73268001  | 0.894222553 |
| 3873 | REACTOME_GABA_RECEPTOR_ACTIVATION                     | 37  | Down | 0.73278936  | 0.894222553 |
| 3874 | ELVIDGE_HIF2A_TARGETS_UP                              | 6   | Up   | 0.733607509 | 0.894989796 |
| 3875 | BIOCARTA_NGF_PATHWAY                                  | 16  | Up   | 0.734804552 | 0.896048075 |
| 3876 | ZUCCHI_METASTASIS_UP                                  | 37  | Down | 0.734854242 | 0.896048075 |
| 3877 | GRADE_METASTASIS_DN                                   | 43  | Down | 0.735053469 | 0.896059763 |
| 3878 | YOSHIOKA_LIVER_CANCER_EARLY_RECURRENCE_DN             | 47  | Up   | 0.736112873 | 0.896863492 |
| 3879 | RAMPON_ENRICHED_LEARNING_ENVIRONMENT_EARLY_DN         | 8   | Up   | 0.736171506 | 0.896863492 |
| 3880 | LIAN_NEUTROPHIL_GRANULE_CONSTITUENTS                  | 9   | Up   | 0.736282219 | 0.896863492 |
| 3881 | BIOCARTA_GSK3_PATHWAY                                 | 22  | Up   | 0.736599624 | 0.897018872 |
| 3882 | REACTOME_P75NTR_SIGNALS_VIA_NFKB                      | 12  | Up   | 0.737182269 | 0.897497094 |
| 3883 | WANG_TARGETS_OF_MLL_CBP_FUSION_DN                     | 44  | Down | 0.738252848 | 0.898518944 |
| 3884 | NAKAMURA_ALVEOLAR_EPITHELIUM                          | 3   | Down | 0.738511354 | 0.898518944 |
| 3885 | REACTOME_NUCLEOTIDE_LIKE_PURINERGIC_RECEPTORS         | 8   | Down | 0.73859208  | 0.898518944 |
| 3886 | TESAR_ALK_TARGETS_EPISC_4D_UP                         | 3   | Up   | 0.738860207 | 0.898613766 |
| 3887 | DARWICHE_SQUAMOUS_CELL_CARCINOMA_UP                   | 114 | Down | 0.739657287 | 0.899126774 |
| 3888 | RASHI_RESPONSE_TO_IONIZING_RADIATION_5                | 128 | Up   | 0.739662597 | 0.899126774 |
| 3889 | BIOCARTA_FMLP_PATHWAY                                 | 29  | Down | 0.740374177 | 0.899760284 |
| 3890 | REACTOME_TCA_CYCLE_AND_RESPIRATORY_ELECTRON_TRANSPORT | 124 | Down | 0.740801296 | 0.900047859 |
| 3891 | NIKOLSKY_BREAST_CANCER_1Q32_AMPLICON                  | 6   | Down | 0.741192054 | 0.900064072 |
| 3892 | BIOCARTA_INFLAM_PATHWAY                               | 8   | Up   | 0.741236332 | 0.900064072 |

|      | A                                                                                | B        | C         | D                  | E                  |
|------|----------------------------------------------------------------------------------|----------|-----------|--------------------|--------------------|
| 3893 | LEE_DOUBLE_POLAR_THYMOCYTE                                                       | 17       | Down      | 0.74138611         | 0.900064072        |
| 3894 | BROWNE_HCMV_INFECTION_48HR_UP                                                    | 156      | Up        | 0.741637355        | 0.900137812        |
| 3895 | ZHAN_MULTIPLE_MYELOMA_MS_DN                                                      | 39       | Down      | 0.742049032        | 0.900189451        |
| 3896 | <b>BIOCARTA_AHSP_PATHWAY</b>                                                     | <b>9</b> | <b>Up</b> | <b>0.742060934</b> | <b>0.900189451</b> |
| 3897 | REACTOME_ER_PHAGOSOME_PATHWAY                                                    | 57       | Up        | 7.42E-01           | 9.00E-01           |
| 3898 | BIOCARTA_TCRA_PATHWAY                                                            | 5        | Down      | 7.43E-01           | 9.00E-01           |
| 3899 | NIKOLSKY_BREAST_CANCER_16Q24_AMPLICON                                            | 47       | Down      | 0.74271694         | 0.900291828        |
| 3900 | BERTUCCI_MEDULLARY_VS_DUCTAL_BREAST_CANCER_UP                                    | 175      | Up        | 0.74375359         | 0.900847072        |
| 3901 | KEGG_PROTEASOME                                                                  | 41       | Down      | 0.743879956        | 0.900847072        |
| 3902 | MANTOVANI_VIRAL_GPCR_SIGNALING_DN                                                | 36       | Down      | 0.743882225        | 0.900847072        |
| 3903 | REACTOME_GLUCAGON_TYPE_LIGAND_RECEPTORS                                          | 20       | Down      | 0.744257652        | 0.900847072        |
| 3904 | SIG_PIP3_SIGNALING_IN_B_LYMPHOCYTES                                              | 28       | Up        | 0.744522141        | 0.900847072        |
| 3905 | XU_RESPONSE_TO_TRETINOIN_AND_NSC682994_DN                                        | 15       | Up        | 0.744565808        | 0.900847072        |
| 3906 | REACTOME_PTM_GAMMA_CARBOXYLATION_HYPUSINE_FORMATION_AND_ARYLSULFATASE_ACTIVATION | 18       | Up        | 0.744587547        | 0.900847072        |
| 3907 | NAGY_STAGA_COMPONENTS_HUMAN                                                      | 15       | Down      | 0.744700246        | 0.900847072        |
| 3908 | GINESTIER_BREAST_CANCER_ZNF217_AMPLIFIED_UP                                      | 75       | Up        | 0.74536355         | 0.901277686        |
| 3909 | REACTOME_REVERSIBLE_HYDRATION_OF_CARBON_DIOXIDE                                  | 8        | Down      | 0.745509344        | 0.901277686        |
| 3910 | PID_KIT_PATHWAY                                                                  | 49       | Up        | 0.74609033         | 0.901277686        |
| 3911 | YANG_BREAST_CANCER_ESR1_BULK_DN                                                  | 21       | Up        | 0.746160042        | 0.901277686        |
| 3912 | ZEMBUTSU_SENSITIVITY_TO_MITOMYCIN                                                | 11       | Up        | 0.746243993        | 0.901277686        |
| 3913 | FOURNIER_ACINAR_DEVELOPMENT_LATE_UP                                              | 8        | Up        | 0.746446473        | 0.901277686        |
| 3914 | BIOCARTA_CHREBP2_PATHWAY                                                         | 40       | Up        | 0.746633188        | 0.901277686        |
| 3915 | REACTOME_GAP_JUNCTION_DEGRADATION                                                | 10       | Down      | 0.746683587        | 0.901277686        |
| 3916 | CERIBELLI_GENES_INACTIVE_AND_BOUND_BY_NFY                                        | 20       | Down      | 0.74677294         | 0.901277686        |

|      | A                                                                                   | B         | C           | D                  | E                  |
|------|-------------------------------------------------------------------------------------|-----------|-------------|--------------------|--------------------|
| 3917 | KEGG_TIGHT_JUNCTION                                                                 | 113       | Up          | 0.747354652        | 0.901476581        |
| 3918 | SA_G2_AND_M_PHASES                                                                  | 8         | Down        | 0.747517935        | 0.901476581        |
| 3919 | PID_ARF6_DOWNSTREAM_PATHWAY                                                         | 15        | Down        | 0.747783279        | 0.901476581        |
| 3920 | TSAI_DNAJB4_TARGETS_UP                                                              | 12        | Up          | 0.74785087         | 0.901476581        |
| 3921 | KONDO_PROSTATE_CANCER_WITH_H3K27ME3                                                 | 47        | Up          | 0.747922448        | 0.901476581        |
| 3922 | GENTLES_LEUKEMIC_STEM_CELL_UP                                                       | 14        | Down        | 0.74808247         | 0.901476581        |
| 3923 | CHENG_TAF7L_TARGETS                                                                 | 4         | Up          | 0.748656496        | 0.901938283        |
| 3924 | SA_TRKA_RECEPTOR                                                                    | 15        | Down        | 0.749023199        | 0.902150042        |
| 3925 | INAMURA_LUNG_CANCER_SCC_SUBTYPES_DN                                                 | 5         | Down        | 0.749468219        | 0.902236234        |
| 3926 | PALOMERO_GSI_SENSITIVITY_UP                                                         | 7         | Down        | 0.74947666         | 0.902236234        |
| 3927 | LEE_BMP2_TARGETS_DN                                                                 | 854       | Up          | 0.749783285        | 0.902375452        |
| 3928 | REACTOME_INFLAMMASOMES                                                              | 11        | Down        | 0.750919895        | 0.903513243        |
| 3929 | KEGG_DORSO_VENTRAL_AXIS_FORMATION                                                   | 21        | Down        | 0.752285429        | 0.904925828        |
| 3930 | PETRETTO_BLOOD_PRESSURE_DN                                                          | 6         | Up          | 0.752486533        | 0.904937355        |
| 3931 | REACTOME_ACTIVATION_OF_NMDA_RECEPTOR_UPON_Glutamate_BINDING_AND_POSTSYNAPTIC_EVENTS | 33        | Down        | 0.753049797        | 0.90505394         |
| 3932 | CHESLER_BRAIN_QTL_CIS                                                               | 65        | Up          | 0.75307269         | 0.90505394         |
| 3933 | BAFNA_MUC4_TARGETS_UP                                                               | 6         | Up          | 0.753158115        | 0.90505394         |
| 3934 | REACTOME_INTEGRATION_OF_ENERGY_METABOLISM                                           | 92        | Up          | 0.753390956        | 0.905103551        |
| 3935 | NABA_ECM_AFFILIATED                                                                 | 81        | Down        | 0.753660416        | 0.905197119        |
| 3936 | MONTERO_THYROID_CANCER_POOR_SURVIVAL_DN                                             | 11        | Down        | 0.754043005        | 0.90542648         |
| 3937 | <b>PID_S1P_S1P4_PATHWAY</b>                                                         | <b>13</b> | <b>Down</b> | <b>0.754577364</b> | <b>0.905837918</b> |
| 3938 | PECE_MAMMARY_STEM_CELL_UP                                                           | 132       | Down        | 7.55E-01           | 9.06E-01           |
| 3939 | PID_RET_PATHWAY                                                                     | 37        | Up          | 7.55E-01           | 9.06E-01           |
| 3940 | CALVET_IRINOTECAN_SENSITIVE_VS_REVERTED_UP                                          | 5         | Up          | 0.756301458        | 0.907207541        |
| 3941 | DARWICHE_PAPILLOMA_RISK_HIGH_DN                                                     | 142       | Up          | 0.756486288        | 0.907207541        |
| 3942 | CHICAS_RB1_TARGETS_LOW_SERUM                                                        | 88        | Up          | 0.75691595         | 0.907435698        |
| 3943 | PID_IFNG_PATHWAY                                                                    | 35        | Down        | 0.75716733         | 0.907435698        |

|      | A                                                                              | B   | C    | D           | E           |
|------|--------------------------------------------------------------------------------|-----|------|-------------|-------------|
| 3944 | CHNG_MULTIPLE_MYELOMA_HYPERPLOID_DN                                            | 27  | Down | 0.757252689 | 0.907435698 |
| 3945 | KIM_MYC_AMPLIFICATION_TARGETS_UP                                               | 181 | Up   | 0.757580785 | 0.907598684 |
| 3946 | DEURIG_T_CELL_PROLYMPHOCYTIC_LEUKEMIA_UP                                       | 309 | Up   | 0.757776155 | 0.907602619 |
| 3947 | PHESSSE_TARGETS_OF_APC_AND_MBD2_UP                                             | 13  | Down | 0.758121728 | 0.907661828 |
| 3948 | BIOCARTA_RAC1_PATHWAY                                                          | 20  | Down | 0.758210799 | 0.907661828 |
| 3949 | REACTOME_GRB2_EVENTS_IN_ERBB2_SIGNALING                                        | 18  | Up   | 0.758516204 | 0.907661828 |
| 3950 | HEDENFALK_BREAST_CANCER_BRACX_UP                                               | 18  | Down | 0.758593981 | 0.907661828 |
| 3951 | TURJANSKI_MAPK14_TARGETS                                                       | 9   | Up   | 0.75980126  | 0.908876191 |
| 3952 | GRAHAM_CML QUIESCENT_VS_NORMAL QUIESCENT_UP                                    | 69  | Up   | 0.760022244 | 0.908910429 |
| 3953 | SCHLOSSER_MYC_TARGETS_AND_SERUM_RESPONSE_DN                                    | 47  | Down | 0.760926437 | 0.909484603 |
| 3954 | DAIRKEE_CANCER_PRONE_RESPONSE_E2                                               | 27  | Down | 0.761004458 | 0.909484603 |
| 3955 | KEGG_RIG_I LIKE RECEPTOR SIGNALING_PATHWAY                                     | 46  | Up   | 0.761079814 | 0.909484603 |
| 3956 | KEGG_TYROSINE_METABOLISM                                                       | 22  | Down | 0.761809673 | 0.910118284 |
| 3957 | SHI_SPARC_TARGETS_DN                                                           | 11  | Up   | 0.76199533  | 0.910118284 |
| 3958 | CHUNG_BLISTER_CYTOTOXICITY_UP                                                  | 114 | Up   | 0.762353058 | 0.910315441 |
| 3959 | HE_PTEN_TARGETS_UP                                                             | 15  | Up   | 0.762700458 | 0.910500168 |
| 3960 | SIG_PIP3_SIGNALING_IN_CARDIAC_MYOCYTES                                         | 63  | Up   | 0.763076903 | 0.910719466 |
| 3961 | NIELSEN_MALIGNANT_FIBROUS_HISTIOCYTOMA_DN                                      | 17  | Down | 0.763305024 | 0.910761676 |
| 3962 | REACTOME_INSULIN_SYNTHESIS_AND_PROCESSING                                      | 18  | Down | 0.76410134  | 0.911187375 |
| 3963 | REACTOME_GAMMA_CARBOXYLATION_TRANSPORT_AND_AMINO_TERMINAL_CLEAVAGE_OF_PROTEINS | 4   | Up   | 0.764158859 | 0.911187375 |
| 3964 | HUMMERICH_SKIN_CANCER_PROGRESSION_DN                                           | 83  | Down | 0.764299309 | 0.911187375 |
| 3965 | PID_A6B1_A6B4_INTEGRIN_PATHWAY                                                 | 45  | Down | 0.764695033 | 0.911187375 |
| 3966 | MEISSNER_NPC_HCP_WITH_H3K4ME2                                                  | 411 | Up   | 0.764891928 | 0.911187375 |

|      | A                                                | B         | C         | D                 | E                  |
|------|--------------------------------------------------|-----------|-----------|-------------------|--------------------|
| 3967 | KEGG_FC_EPSILON_RI_SIGNALING_PATHWAY             | 55        | Down      | 0.765010045       | 0.911187375        |
| 3968 | CHENG_RESPONSE_TO_NICKEL_ACETATE                 | 38        | Up        | 0.765087982       | 0.911187375        |
| 3969 | REACTOME_IL_RECEPTOR_SHC_SIGNALING               | 17        | Down      | 0.765252474       | 0.911187375        |
| 3970 | BIOCARTA_EPONFKB_PATHWAY                         | 10        | Down      | 0.765397395       | 0.911187375        |
| 3971 | CHEN_LUNG_CANCER_SURVIVAL                        | 24        | Up        | 0.766652186       | 0.912100611        |
| 3972 | WATANABE_COLON_CANCER_MSI_VS_MSS_UP              | 19        | Up        | 0.766709284       | 0.912100611        |
| 3973 | ST_MYOCYTE_AD_PATHWAY                            | 16        | Up        | 0.766743625       | 0.912100611        |
| 3974 | BACOLOD_RESISTANCE_TO_ALKYLATING_AGENT_S_UP      | 20        | Up        | 0.767830233       | 0.913163315        |
| 3975 | GAUSSMANN_MLL_AF4_FUSION_TARGETS_A_UP            | 171       | Up        | 0.768335772       | 0.913534606        |
| 3976 | BROWNE_HCMV_INFECTION_24HR_UP                    | 132       | Down      | 0.768542602       | 0.913550641        |
| 3977 | GRAHAM_CML_DIVIDING_VS_NORMAL_DIVIDING_UP        | 8         | Down      | 0.768843988       | 0.913653265        |
| 3978 | <b>BAE_BRCA1_TARGETS_DN</b>                      | <b>31</b> | <b>Up</b> | <b>0.76918126</b> | <b>0.913653265</b> |
| 3979 | SANSOM_APC_MYC_TARGETS                           | 208       | Up        | 7.69E-01          | 9.14E-01           |
| 3980 | ABE_INNER_EAR                                    | 39        | Up        | 7.69E-01          | 9.14E-01           |
| 3981 | BREUHAHN_GROWTH_FACTOR_SIGNALING_IN_LIVER_CANCER | 21        | Down      | 0.769595766       | 0.913653265        |
| 3982 | WESTON_VEGFA_TARGETS_3HR                         | 57        | Down      | 0.769938919       | 0.913806063        |
| 3983 | MATZUK_SPERMATOZOA                               | 76        | Down      | 0.770165058       | 0.913806063        |
| 3984 | PEART_HDAC_PROLIFERATION_CLUSTER_UP              | 56        | Down      | 0.770304666       | 0.913806063        |
| 3985 | TAKADA_GASTRIC_CANCER_COPY_NUMBER_UP             | 7         | Down      | 0.771036664       | 0.913953317        |
| 3986 | SOTIRIOU_BREAST_CANCER_GRADE_1_VS_3_DN           | 47        | Up        | 0.771049743       | 0.913953317        |
| 3987 | PID_MET_PATHWAY                                  | 77        | Down      | 0.771159224       | 0.913953317        |
| 3988 | BROWNE_HCMV_INFECTION_8HR_UP                     | 85        | Down      | 0.771202513       | 0.913953317        |
| 3989 | LINSLEY_MIR16_TARGETS                            | 201       | Up        | 0.772050283       | 0.914728582        |
| 3990 | MUELLER_METHYLATED_IN_GLIOMASTOMA                | 19        | Down      | 0.773404515       | 0.915521932        |
| 3991 | BERNARD_PPAPDC1B_TARGETS_UP                      | 36        | Up        | 0.773448373       | 0.915521932        |
| 3992 | PID_PS1_PATHWAY                                  | 42        | Up        | 0.773585665       | 0.915521932        |
| 3993 | BYSTRYKH_SCP2_QTL                                | 4         | Down      | 0.773795763       | 0.915521932        |

|      | A                                                               | B         | C         | D                  | E                  |
|------|-----------------------------------------------------------------|-----------|-----------|--------------------|--------------------|
| 3994 | KEGG_INOSITOL_PHOSPHATE_METABOLISM                              | 47        | Up        | 0.773953708        | 0.915521932        |
| 3995 | REACTOME_ACTIVATION_OF_KAINATE_RECEPTORS_UPON_Glutamate_BINDING | 26        | Down      | 0.774358531        | 0.915521932        |
| 3996 | MASSARWEH_RESPONSE_TO ESTRADIOL                                 | 55        | Up        | 0.774417622        | 0.915521932        |
| 3997 | LI_INDUCED_T_TO NATURAL_KILLER_DN                               | 91        | Down      | 0.774459292        | 0.915521932        |
| 3998 | ZHAN_LATE_DIFFERENTIATION_GENES_DN                              | 13        | Up        | 0.774463738        | 0.915521932        |
| 3999 | BIOCARTA_TPO_PATHWAY                                            | 21        | Up        | 0.774724602        | 0.915549036        |
| 4000 | THEODOROU_MAMMARY_TUMORIGENESIS                                 | 22        | Down      | 0.774908364        | 0.915549036        |
| 4001 | BYSTROEM_CORRELATED_WITH_IL5_UP                                 | 39        | Up        | 0.775144166        | 0.915549036        |
| 4002 | BENPORATH_SUZ12_TARGETS                                         | 567       | Down      | 0.775261734        | 0.915549036        |
| 4003 | HESSON_TUMOR_SUPPRESSOR_CLUSTER_3P21_3                          | 6         | Up        | 0.775755807        | 0.915764376        |
| 4004 | PID_CXCR4_PATHWAY                                               | 87        | Down      | 0.775831703        | 0.915764376        |
| 4005 | REACTOME_PI3K_AKT_ACTIVATION                                    | 33        | Down      | 0.776174863        | 0.915878499        |
| 4006 | KEGG_PRIMARY_IMMUNODEFICIENCY                                   | 16        | Down      | 0.776328581        | 0.915878499        |
| 4007 | MARTORIATI_MDM4_TARGETS_NEUROEPITHELIUM_DN                      | 123       | Up        | 0.776734977        | 0.915878499        |
| 4008 | REACTOME_CITRIC_ACID_CYCLE_TCA_CYCLE                            | 19        | Up        | 0.776772621        | 0.915878499        |
| 4009 | YAMASHITA_SILENCED_BY METHYLATION                               | 6         | Down      | 0.777145864        | 0.915878499        |
| 4010 | JUBAN_TARGETS_OF_SPI1_AND_FLI1_UP                               | 108       | Down      | 0.777232786        | 0.915878499        |
| 4011 | SATO_SILENCED_BY METHYLATION_IN_PANCREATIC_CANCER_2             | 33        | Up        | 0.777285245        | 0.915878499        |
| 4012 | REACTOME_INITIAL_TRIGGERING_OF_COMPLEMENT                       | 4         | Down      | 0.777658354        | 0.916089684        |
| 4013 | REACTOME_SIGNALING_BY_FGFR3_MUTANTS                             | 5         | Up        | 0.778132896        | 0.916420223        |
| 4014 | PID_MTOR_4PATHWAY                                               | 69        | Down      | 0.779476462        | 0.917261582        |
| 4015 | BIOCARTA_DC_PATHWAY                                             | 3         | Up        | 0.779811091        | 0.917261582        |
| 4016 | SONG_TARGETS_OF_IE86_CMV_PROTEIN                                | 60        | Up        | 0.78033478         | 0.917261582        |
| 4017 | CHOI_ATL_CHRONIC_VS_ACUTE_DN                                    | 18        | Up        | 0.780411844        | 0.917261582        |
| 4018 | ABBUD_LIF_SIGNALING_1_DN                                        | 20        | Down      | 0.780972679        | 0.917261582        |
| 4019 | <b>PID_IL8_CXCR1_PATHWAY</b>                                    | <b>22</b> | <b>Up</b> | <b>0.781215759</b> | <b>0.917261582</b> |
| 4020 | WILLIAMS_ESR2_TARGETS_UP                                        | 24        | Down      | 7.81E-01           | 9.17E-01           |

|      | A                                                      | B   | C    | D           | E           |
|------|--------------------------------------------------------|-----|------|-------------|-------------|
| 4021 | NIKOLSKY_BREAST_CANCER_10Q22_AMPLICON                  | 8   | Down | 7.81E-01    | 9.17E-01    |
| 4022 | LOCKWOOD_AMPLIFIED_IN_LUNG_CANCER                      | 209 | Up   | 0.781334602 | 0.917261582 |
| 4023 | MIKKELSEN_ES_ICP_WITH_H3K27ME3                         | 19  | Up   | 0.781500972 | 0.917261582 |
| 4024 | STEIN_ESRRA_TARGETS                                    | 515 | Up   | 0.781539848 | 0.917261582 |
| 4025 | REACTOME_ORGANIC_CATION_ANION_ZWITTERI<br>ON_TRANSPORT | 4   | Down | 0.78156343  | 0.917261582 |
| 4026 | LEE_NEURAL_CREST_STEM_CELL_UP                          | 111 | Up   | 0.781566012 | 0.917261582 |
| 4027 | REACTOME_RAP1_SIGNALLING                               | 15  | Down | 0.781773283 | 0.917261582 |
| 4028 | KIM_GERMINAL_CENTER_T_HELPER_DN                        | 19  | Down | 0.781969731 | 0.917261582 |
| 4029 | NADELLA_PRKAR1A_TARGETS_UP                             | 9   | Down | 0.781976991 | 0.917261582 |
| 4030 | KEGG_GLYCOLYSIS_GLUONEOGENESIS                         | 42  | Down | 0.782147495 | 0.917261582 |
| 4031 | MCLACHLAN_DENTAL_CARIES_DN                             | 68  | Down | 0.782644201 | 0.917515261 |
| 4032 | REACTOME_NOD1_2_SIGNALING_PATHWAY                      | 24  | Up   | 0.782752173 | 0.917515261 |
| 4033 | KANG_IMMORTALIZED_BY_TERT_UP                           | 68  | Up   | 0.783134531 | 0.917735778 |
| 4034 | RAY_TUMORIGENESIS_BY_ERBB2_CDC25A_DN                   | 136 | Up   | 0.783591542 | 0.91787502  |
| 4035 | CHEN_ETV5_TARGETS_TESTIS                               | 20  | Up   | 0.783641869 | 0.91787502  |
| 4036 | ACEVEDO_LIVER_TUMOR_VS_NORMAL_ADJACEN<br>T_TISSUE_UP   | 816 | Up   | 0.784500733 | 0.918085067 |
| 4037 | GRAESSMANN_RESPONSE_TO_MC_AND_DOXOR<br>UBICIN_UP       | 546 | Up   | 0.784776991 | 0.918085067 |
| 4038 | ALCALA_APOPTOSIS                                       | 76  | Down | 0.784817183 | 0.918085067 |
| 4039 | KONDO_PROSTATE_CANCER_HCP_WITH_H3K27M<br>E3            | 66  | Down | 0.785011188 | 0.918085067 |
| 4040 | LI_DCP2_BOUND_MRNA                                     | 89  | Up   | 0.785057194 | 0.918085067 |
| 4041 | PID_IL12_STAT4_PATHWAY                                 | 16  | Up   | 0.785462892 | 0.918085067 |
| 4042 | SESTO_RESPONSE_TO_UV_C1                                | 61  | Up   | 0.785524119 | 0.918085067 |
| 4043 | BOYAUULT_LIVER_CANCER_SUBCLASS_G23_UP                  | 51  | Up   | 0.785678199 | 0.918085067 |
| 4044 | SA_PTEN_PATHWAY                                        | 17  | Up   | 0.785697426 | 0.918085067 |
| 4045 | HAHTOLA_SEZARY_SYNDROM_UP                              | 69  | Up   | 0.785764235 | 0.918085067 |
| 4046 | KOHOUTEK_CCNT2_TARGETS                                 | 49  | Down | 0.786055434 | 0.918198252 |
| 4047 | REACTOME_G_PROTEIN_ACTIVATION                          | 19  | Down | 0.78698868  | 0.919061175 |
| 4048 | KEGG_ASTHMA                                            | 9   | Up   | 0.787425437 | 0.919116904 |



|      | A                                                                                    | B          | C         | D                 | E                  |
|------|--------------------------------------------------------------------------------------|------------|-----------|-------------------|--------------------|
| 4049 | REACTOME_GRB2_SOS_PROVIDES_LINKAGE_TO_MAPK_SIGNALING_FOR_INTERGRINS_                 | 10         | Up        | 0.787425445       | 0.919116904        |
| 4050 | LEE_LIVER_CANCER_ACOX1_DN                                                            | 37         | Up        | 0.787817292       | 0.919147817        |
| 4051 | REACTOME_TRAF6_MEDIATED_INDUCION_OF_NFKB_AND_MAP_KINASES_UPON_TLR7_8_OR_9_ACTIVATION | 67         | Up        | 0.787840986       | 0.919147817        |
| 4052 | PID_ERBB2_ERBB3_PATHWAY                                                              | 40         | Down      | 0.788055526       | 0.919171158        |
| 4053 | REACTOME_CELL_DEATH_SIGNALLING_VIA_NRA_GE_NRF1_AND_NAIP1                             | 56         | Up        | 0.78849299        | 0.919454437        |
| 4054 | IVANOVA_HEMATOPOIESIS_STEM_CELL_AND_PROGENITOR                                       | 577        | Up        | 0.789050265       | 0.919456634        |
| 4055 | SCIAN_CELL_CYCLE_TARGETS_OF_TP53_AND_TP73_UP                                         | 9          | Up        | 0.78920224        | 0.919456634        |
| 4056 | AUNG_GASTRIC_CANCER                                                                  | 40         | Up        | 0.789928631       | 0.919456634        |
| 4057 | MATZUK_PREOVULATORY_FOLLICLE                                                         | 7          | Up        | 0.790079394       | 0.919456634        |
| 4058 | BROWNE_HCMV_INFECTION_30MIN_DN                                                       | 113        | Up        | 0.790216652       | 0.919456634        |
| 4059 | NUYTEN_EZH2_TARGETS_DN                                                               | 965        | Down      | 0.790461182       | 0.919456634        |
| 4060 | <b>MOREAUX_MULTIPLE_MYELOMA_BY_TACI_UP</b>                                           | <b>291</b> | <b>Up</b> | <b>0.79047835</b> | <b>0.919456634</b> |
| 4061 | LU_TUMOR_ANGIOGENESIS_UP                                                             | 23         | Down      | 7.90E-01          | 9.19E-01           |
| 4062 | BOYALT_LIVER_CANCER_SUBCLASS_G1_UP                                                   | 109        | Down      | 7.91E-01          | 9.19E-01           |
| 4063 | LU_TUMOR_VASCULATURE_UP                                                              | 24         | Up        | 0.79069514        | 0.919456634        |
| 4064 | VANASSE_BCL2_TARGETS_DN                                                              | 61         | Up        | 0.790889135       | 0.919456634        |
| 4065 | BIOCARTA_GABA_PATHWAY                                                                | 8          | Down      | 0.790978186       | 0.919456634        |
| 4066 | BARIS_THYROID_CANCER_UP                                                              | 23         | Down      | 0.791024596       | 0.919456634        |
| 4067 | REACTOME_HORMONE_LIGAND_BINDING_RECEPTORS                                            | 1          | Up        | 0.791223832       | 0.919462028        |
| 4068 | REACTOME_TRAF6_MEDIATED_NFKB_ACTIVATION                                              | 18         | Up        | 0.791914008       | 0.920037789        |
| 4069 | DARWICHE_SKIN_TUMOR_PROMOTER_DN                                                      | 144        | Down      | 0.792173268       | 0.920055709        |
| 4070 | TSAI_RESPONSE_TO_IONIZING_RADIATION                                                  | 125        | Down      | 0.792318874       | 0.920055709        |
| 4071 | LEIN_NEURON_MARKERS                                                                  | 60         | Up        | 0.792835991       | 0.920323713        |



|      | A                                                                                   | B    | C    | D           | E           |
|------|-------------------------------------------------------------------------------------|------|------|-------------|-------------|
| 4072 | KEGG_B_CELL_RECEPTOR_SIGNALING_PATHWAY                                              | 64   | Up   | 0.792939225 | 0.920323713 |
| 4073 | REACTOME_CYTOKINE_SIGNALING_IN_IMMUNE_SYSTEM                                        | 198  | Up   | 0.79348339  | 0.920541    |
| 4074 | PID_BMP_PATHWAY                                                                     | 40   | Down | 0.793789071 | 0.920541    |
| 4075 | ZWANG_TRANSIENTLY_UP_BY_2ND_EGF_PULSE_ONLY                                          | 837  | Up   | 0.793793098 | 0.920541    |
| 4076 | LIANG_SILENCED_BY_METHYLATION_2                                                     | 27   | Down | 0.79390573  | 0.920541    |
| 4077 | CALVET_IRINOTECAN_SENSITIVE_VS_REVERTED_DN                                          | 4    | Up   | 0.795711246 | 0.922253412 |
| 4078 | MORI_PLASMA_CELL_UP                                                                 | 49   | Up   | 0.795827935 | 0.922253412 |
| 4079 | DIRMEIER_LMP1_RESPONSE_LATE_DN                                                      | 26   | Down | 0.796095277 | 0.922253412 |
| 4080 | REACTOME_ACETYLCHOLINE_BINDING_AND_DOWNSSTREAM_EVENTS                               | 8    | Up   | 0.796381795 | 0.922253412 |
| 4081 | REACTOME_HIGHLY_CALCIIUM_PERMEABLE_POST_SYNAPTIC_NICOTINIC_ACETYLCHOLINE_RECEPTOR_S | 8    | Up   | 0.796381795 | 0.922253412 |
| 4082 | KEGG_INSULIN_SIGNALING_PATHWAY                                                      | 120  | Up   | 0.796553688 | 0.922253412 |
| 4083 | HUTTMANN_B CLL_POOR_SURVIVAL_UP                                                     | 224  | Up   | 0.797433996 | 0.922822895 |
| 4084 | GRAESSMANN_APOPTOSIS_BY_DOXORUBICIN_UP                                              | 1002 | Up   | 0.797436165 | 0.922822895 |
| 4085 | KIM_RESPONSE_TO_TSA_AND_DECITABINE_DN                                               | 12   | Down | 0.797978364 | 0.923224233 |
| 4086 | CHIBA_RESPONSE_TO_TSA_UP                                                            | 43   | Up   | 0.798312702 | 0.923384949 |
| 4087 | YANG_BCL3_TARGETS_UP                                                                | 293  | Up   | 0.798574436 | 0.923461627 |
| 4088 | GENTILE_UV_LOW_DOSE_DN                                                              | 63   | Up   | 0.799092337 | 0.923618161 |
| 4089 | PID_SMAD2_3PATHWAY                                                                  | 17   | Down | 0.799150679 | 0.923618161 |
| 4090 | STARK_PREFRONTAL_CORTEX_22Q11_DELETION_DN                                           | 498  | Up   | 0.799296224 | 0.923618161 |
| 4091 | KUNINGER_IGF1_VS_PDGF_B_TARGETS_UP                                                  | 53   | Up   | 0.79958348  | 0.923724192 |
| 4092 | DACOSTA_UV_RESPONSE_VIA_ERCC3_TTD_DN                                                | 80   | Down | 0.800109124 | 0.924105502 |
| 4093 | LEE_LIVER_CANCER                                                                    | 19   | Down | 0.801204808 | 0.925144848 |
| 4094 | MYLLYKANGAS_AMPLIFICATION_HOT_SPOT_6                                                | 5    | Down | 0.802741805 | 0.926693142 |

|      | A                                                                                 | B          | C           | D                  | E                 |
|------|-----------------------------------------------------------------------------------|------------|-------------|--------------------|-------------------|
| 4095 | KEGG_ADHERENS_JUNCTION                                                            | 72         | Down        | 0.803064747        | 0.926839505       |
| 4096 | REACTOME_P75_NTR_RECEPTOR_MEDIATED_SIG<br>NALLING                                 | 75         | Down        | 0.803829868        | 0.926872072       |
| 4097 | NAKAMURA_LUNG_CANCER                                                              | 7          | Up          | 0.803875253        | 0.926872072       |
| 4098 | DODD_NASOPHARYNGEAL_CARCINOMA_DN                                                  | 1267       | Down        | 0.803883313        | 0.926872072       |
| 4099 | REACTOME_DEGRADATION_OF_THE_EXTRACELL<br>ULAR_MATRIX                              | 14         | Up          | 0.803952138        | 0.926872072       |
| 4100 | BIOCARTA_ERK5_PATHWAY                                                             | 15         | Down        | 0.804073782        | 0.926872072       |
| 4101 | <b>REACTOME_SYNTHESIS_OF_PIPS_AT_THE_PLAS<br/>MA_MEMBRANE</b>                     | <b>26</b>  | <b>Down</b> | <b>0.804576416</b> | <b>0.92722526</b> |
| 4102 | ONDER_CDH1_TARGETS_3_DN                                                           | 31         | Up          | 8.06E-01           | 9.29E-01          |
| 4103 | STEIN_ESRRA_TARGETS_DN                                                            | 100        | Down        | 8.06E-01           | 9.29E-01          |
| 4104 | TOMLINS_PROSTATE_CANCER_UP                                                        | 39         | Down        | 0.806466804        | 0.928566735       |
| 4105 | LANDIS_BREAST_CANCER_PROGRESSION_UP                                               | 39         | Up          | 0.806526535        | 0.928566735       |
| 4106 | FIGUEROA_AML_METHYLATION_CLUSTER_6_DN                                             | 19         | Up          | 0.80676813         | 0.928618615       |
| 4107 | BRUINS_UVC_RESPONSE_VIA_TP53_GROUP_C                                              | 74         | Up          | 0.807012311        | 0.928673446       |
| 4108 | <b>AFFAR_YY1_TARGETS_DN</b>                                                       | <b>183</b> | <b>Up</b>   | <b>0.807210754</b> | <b>0.92867563</b> |
| 4109 | MORI_SMALL_PRE_BII_LYMPHOCYTE_UP                                                  | 72         | Up          | 0.807480302        | 0.928759598       |
| 4110 | FLECHNER_PBL_KIDNEY_TRANSPLANT_OK_VS_D<br>ONOR_UP                                 | 142        | Up          | 0.807809716        | 0.928912365       |
| 4111 | KEGG_VEGF_SIGNALING_PATHWAY                                                       | 62         | Down        | 0.808808828        | 0.92915536        |
| 4112 | SUZUKI_RESPONSE_TO_TSA_AND_DECITABINE_1<br>A                                      | 12         | Up          | 0.809035204        | 0.92915536        |
| 4113 | WANG_RESPONSE_TO_BEXAROTENE_UP                                                    | 27         | Up          | 0.809038153        | 0.92915536        |
| 4114 | SCHLESINGER_METHYLATED_IN_COLON_CANCER<br>BYSTRYKH_HEMATOPOIESIS_STEM_CELL_SCP2_Q | 6          | Up          | 0.809295645        | 0.92915536        |
| 4115 | TL_TRANS                                                                          | 17         | Down        | 0.809466           | 0.92915536        |
| 4116 | ACEVEDO_METHYLATED_IN_LIVER_CANCER_DN                                             | 471        | Up          | 0.80955024         | 0.92915536        |
| 4117 | BONOME_OVARIAN_CANCER_SURVIVAL_SUBOP<br>TIMAL_DEBULKING                           | 440        | Down        | 0.809675943        | 0.92915536        |

|      | A                                                                            | B         | C         | D                  | E                  |
|------|------------------------------------------------------------------------------|-----------|-----------|--------------------|--------------------|
| 4118 | DING_LUNG_CANCER_EXPRESSION_BY_COPY_NUMBER                                   | 100       | Down      | 0.80969493         | 0.92915536         |
| 4119 | ACEVEDO_LIVER_CANCER_WITH_H3K27ME3_DN                                        | 132       | Up        | 0.80986425         | 0.92915536         |
| 4120 | REACTOME_REGULATION_OF_INSULIN_SECRETION                                     | 68        | Up        | 0.809987498        | 0.92915536         |
| 4121 | FERRANDO_TAL1_NEIGHBORS                                                      | 9         | Up        | 0.810367378        | 0.929208204        |
| 4122 | MCCLUNG_DELTA_FOSB_TARGETS_2WK                                               | 42        | Up        | 0.810560633        | 0.929208204        |
| 4123 | MIKKELSEN_NPC_LCP_WITH_H3K4ME3                                               | 42        | Up        | 0.810692418        | 0.929208204        |
| 4124 | SCIBETTA_KDM5B_TARGETS_DN                                                    | 79        | Down      | 0.810935941        | 0.929208204        |
| 4125 | HU_ANGIOGENESIS_DN                                                           | 34        | Down      | 0.811016853        | 0.929208204        |
| 4126 | KORKOLA_EMBRYONAL_CARCINOMA                                                  | 13        | Up        | 0.811239777        | 0.92923829         |
| 4127 | VALK_AML_CLUSTER_16                                                          | 22        | Up        | 0.811783438        | 0.929635663        |
| 4128 | LINDGREN_BLADDER_CANCER_CLUSTER_1_DN                                         | 336       | Up        | 0.812355911        | 0.930047697        |
| 4129 | MORI_PRE_BI_LYMPHOCYTE_UP                                                    | 72        | Down      | 0.812536908        | 0.930047697        |
| 4130 | PURBEY_TARGETS_OF_CTBP1_NOT_SATB1_UP                                         | 275       | Down      | 0.812835235        | 0.930059938        |
| 4131 | YANG_BCL3_TARGETS_DN                                                         | 5         | Down      | 0.812941279        | 0.930059938        |
| 4132 | BROWNE_HCMV_INFECTION_12HR_UP                                                | 93        | Down      | 0.814024603        | 0.931073892        |
| 4133 | NIKOLSKY_OVERCONNECTED_IN_BREAST_CANCER                                      | 14        | Up        | 0.814825221        | 0.931539309        |
| 4134 | NIELSEN_GIST_AND_SYNOVIAL_SARCOMA_UP                                         | 16        | Up        | 0.8149869          | 0.931539309        |
| 4135 | REACTOME_INHIBITION_OF_VOLTAGE_GATED_CACI2_CHANNELS_VIA_GBETA_GAMMA_SUBUNITS | 17        | Down      | 0.815155147        | 0.931539309        |
| 4136 | BIOCARTA_SKP2E2F_PATHWAY                                                     | 10        | Up        | 0.815307506        | 0.931539309        |
| 4137 | BILBAN_B_CLL_LPL_DN                                                          | 35        | Up        | 0.815417266        | 0.931539309        |
| 4138 | KEGG_RENAL_CELL_CARCINOMA                                                    | 64        | Up        | 0.815827972        | 0.931783216        |
| 4139 | MYLLYKANGAS_AMPLIFICATION_HOT_SPOT_5                                         | 4         | Down      | 0.816107586        | 0.931877319        |
| 4140 | WANG_RECURRENT_LIVER_CANCER_UP                                               | 20        | Down      | 0.816777503        | 0.932416937        |
| 4141 | RATTENBACHER_BOUND_BY_CELF1                                                  | 357       | Down      | 0.817134924        | 0.932539531        |
| 4142 | <b>BARRIER_CANCER_RELAPSE_NORMAL_SAMPLE_DN</b>                               | <b>31</b> | <b>Up</b> | <b>0.817279619</b> | <b>0.932539531</b> |
| 4143 | BIOCARTA_MYOSIN_PATHWAY                                                      | 29        | Down      | 8.18E-01           | 9.33E-01           |

|      | A                                                         | B   | C    | D           | E           |
|------|-----------------------------------------------------------|-----|------|-------------|-------------|
| 4144 | GRADE_COLON_CANCER_DN                                     | 26  | Up   | 8.18E-01    | 9.33E-01    |
| 4145 | REACTOME_TRANSCRIPTION_COUPLED_NER_TC_NER                 | 41  | Down | 0.817884474 | 0.932554088 |
| 4146 | REACTOME_IL_3_5_AND_GM-CSF_SIGNALING                      | 32  | Down | 0.81815082  | 0.93263272  |
| 4147 | FLECHNER_BIOPSY_KIDNEY_TRANSPLANT_OK_VS_DONOR_DN          | 23  | Up   | 0.818772513 | 0.93301424  |
| 4148 | PID_GMCSF_PATHWAY                                         | 33  | Up   | 0.819043175 | 0.93301424  |
| 4149 | DORMOY_ELAVL1_TARGETS                                     | 14  | Down | 0.819197271 | 0.93301424  |
| 4150 | BOWIE_RESPONSE_TO_EXTRACELLULAR_MATRIX                    | 14  | Up   | 0.819275361 | 0.93301424  |
| 4151 | NIKOLSKY_BREAST_CANCER_17P11_AMPLICON                     | 7   | Down | 0.81998298  | 0.933595079 |
| 4152 | POMEROY_MEDULLOBLASTOMA_PROGNOSIS_UP                      | 39  | Down | 0.820199852 | 0.933617032 |
| 4153 | KORKOLA_SEMINOMA_UP                                       | 42  | Up   | 0.82069405  | 0.933803872 |
| 4154 | TERAO_AOX4_TARGETS_HG_DN                                  | 5   | Up   | 0.820763611 | 0.933803872 |
| 4155 | FONTAINE_FOLLICULAR_THYROID_ADENOMA_DN                    | 52  | Up   | 0.821069907 | 0.933803872 |
| 4156 | DOANE_RESPONSE_TO_ANDROGEN_DN                             | 221 | Up   | 0.821203008 | 0.933803872 |
| 4157 | BHAT_ESR1_TARGETS_NOT_VIA_AKT1_DN                         | 75  | Up   | 0.82136446  | 0.933803872 |
| 4158 | DACOSTA_UV_RESPONSE_VIA_ERCC3_TTD_UP                      | 60  | Up   | 0.821822022 | 0.933803872 |
| 4159 | KEGG_P53_SIGNALING_PATHWAY                                | 63  | Up   | 0.821830292 | 0.933803872 |
| 4160 | BECKER_TAMOXIFEN_RESISTANCE_DN                            | 40  | Up   | 0.821945038 | 0.933803872 |
| 4161 | KYNG_ENVIRONMENTAL_STRESS_RESPONSE_NOT_BY_4NQO_IN_OLD     | 12  | Up   | 0.822988664 | 0.934758785 |
| 4162 | REACTOME_NGF_SIGNALLING_VIA_TRKA_FROM_THE_PLASMA_MEMBRANE | 126 | Up   | 0.823181229 | 0.934758785 |
| 4163 | PURBEY_TARGETS_OF_CTBP1_AND_SATB1_DN                      | 148 | Down | 0.823851492 | 0.935228415 |
| 4164 | SANA_RESPONSE_TO_IFNG_DN                                  | 79  | Down | 0.823990665 | 0.935228415 |
| 4165 | AMIT_EGF_RESPONSE_480_MCF10A                              | 40  | Up   | 0.825021644 | 0.935759788 |
| 4166 | STEIN_ESRRA_TARGETS_RESPONSIVE_TO_ESTROGEN_UP             | 29  | Up   | 0.825039731 | 0.935759788 |
| 4167 | UROSEVIC_RESPONSE_TO_IMIQUIMOD                            | 13  | Up   | 0.825137579 | 0.935759788 |

|      | A                                                               | B   | C    | D           | E           |
|------|-----------------------------------------------------------------|-----|------|-------------|-------------|
| 4168 | MYLLYKANGAS_AMPLIFICATION_HOT_SPOT_17                           | 14  | Down | 0.825251013 | 0.935759788 |
| 4169 | NAKAMURA_BRONCHIAL_AND_BRONCHIOLAR_E<br>PITHELIA                | 3   | Up   | 0.825958513 | 0.936337326 |
| 4170 | BRACHAT_RESPONSE_TO_CISPLATIN                                   | 21  | Down | 0.826878845 | 0.936783436 |
| 4171 | PEART_HDAC_PROLIFERATION_CLUSTER_DN                             | 70  | Down | 0.826952748 | 0.936783436 |
| 4172 | SHETH_LIVER_CANCER_VS_TXNIP_LOSS_PAM4                           | 177 | Up   | 0.827129502 | 0.936783436 |
| 4173 | DARWICHE_PAPILLOMA_RISK_HIGH_VS_LOW_UP                          | 6   | Up   | 0.827145078 | 0.936783436 |
| 4174 | MOOTHA_PGC                                                      | 394 | Up   | 0.827565821 | 0.937035347 |
| 4175 | MATZUK_FERTILIZATION                                            | 6   | Up   | 0.828161382 | 0.937249631 |
| 4176 | REACTOME_SIGNAL_REGULATORY_PROTEIN_SIR<br>P_FAMILY_INTERACTIONS | 8   | Down | 0.828300585 | 0.937249631 |
| 4177 | REACTOME_ADP_SIGNALLING_THROUGH_P2RY1<br>2                      | 16  | Down | 0.82835015  | 0.937249631 |
| 4178 | GARY_CD5_TARGETS_DN                                             | 411 | Up   | 0.828837634 | 0.937576687 |
| 4179 | RAMJAUN_APOPTOSIS_BY_TGFB1_VIA_SMAD4_<br>DN                     | 8   | Down | 0.829663585 | 0.938286367 |
| 4180 | PID_BARD1_PATHWAY                                               | 29  | Up   | 0.829916779 | 0.938348117 |
| 4181 | HOSHIDA_LIVER_CANCER_SUBCLASS_S2                                | 110 | Up   | 0.830381658 | 0.938649123 |
| 4182 | ZHANG_BREAST_CANCER_PROGENITORS_UP                              | 421 | Up   | 0.831082894 | 0.939217095 |
| 4183 | REACTOME_G_BETA_GAMMA_SIGNALLING_THR<br>OUGH_PLC_BETA           | 16  | Up   | 0.831291658 | 0.93922838  |
| 4184 | PARENT_MTOR_SIGNALING_UP                                        | 511 | Up   | 8.32E-01    | 9.39E-01    |
| 4185 | REACTOME_GAB1_SIGNALOSOME                                       | 36  | Up   | 8.32E-01    | 9.40E-01    |
| 4186 | WEIGEL_OXIDATIVE_STRESS_RESPONSE                                | 32  | Up   | 0.832851926 | 0.940316691 |
| 4187 | REACTOME_RESPIRATORY_ELECTRON_TRANSPOR<br>T                     | 74  | Down | 0.833062499 | 0.940329744 |
| 4188 | MCCABE_HOXC6_TARGETS_UP                                         | 7   | Down | 0.833344929 | 0.94039756  |
| 4189 | YOSHIMURA_MAPK8_TARGETS_UP                                      | 848 | Down | 0.833520631 | 0.94039756  |
| 4190 | REACTOME_GPCR_DOWNSTREAM_SIGNALING                              | 234 | Up   | 0.834046455 | 0.940584166 |
| 4191 | PID_ANTHRAX_PATHWAY                                             | 11  | Down | 0.834196023 | 0.940584166 |
| 4192 | BIOCARTA_LONGEVITY_PATHWAY                                      | 11  | Up   | 0.834283226 | 0.940584166 |

|      | A                                             | B   | C    | D           | E           |
|------|-----------------------------------------------|-----|------|-------------|-------------|
| 4193 | FAELT_B_CLL_WITH_VH3_21_DN                    | 48  | Down | 0.835260929 | 0.941030643 |
| 4194 | REACTOME_DARPP_32_EVENTS                      | 23  | Up   | 0.835362053 | 0.941030643 |
| 4195 | ZHENG_FOXP3_TARGETS_IN_THYMUS_UP              | 177 | Down | 0.835389056 | 0.941030643 |
| 4196 | REACTOME_SYNTHESIS_OF_PA                      | 19  | Up   | 0.835475883 | 0.941030643 |
| 4197 | NIKOLSKY_BREAST_CANCER_19Q13.1_AMPLICON       | 20  | Down | 0.835678884 | 0.941034968 |
| 4198 | SPIELMAN_LYMPHOBLAST_EUROPEAN_VS_ASIAN_2FC_UP | 11  | Up   | 0.83605569  | 0.941234962 |
| 4199 | KEGG_TASTE_TRANSDUCTION                       | 21  | Up   | 0.836563682 | 0.941582514 |
| 4200 | REACTOME_FGFR4_LIGAND_BINDING_AND_ACTIVATION  | 6   | Down | 0.837062158 | 0.941666021 |
| 4201 | SUMI_HNF4A_TARGETS                            | 11  | Up   | 0.8371956   | 0.941666021 |
| 4202 | BONOME_OVARIAN_CANCER_POOR_SURVIVAL_UP        | 29  | Up   | 0.837235757 | 0.941666021 |
| 4203 | CASTELLANO_HRAS_AND_NRAS_TARGETS_UP           | 4   | Up   | 0.837449354 | 0.941682103 |
| 4204 | YAGI_AML_WITH_T_9_11_TRANSLOCATION            | 104 | Up   | 0.837999477 | 0.942076499 |
| 4205 | ALONSO_METASTASIS_EMT_DN                      | 1   | Down | 0.83857777  | 0.942333902 |
| 4206 | TUOMISTO_TUMOR_SUPPRESSION_BY_COL13A1_DN      | 4   | Down | 0.839161628 | 0.942333902 |
| 4207 | BIOCARTA_BARR_MAPK_PATHWAY                    | 11  | Down | 0.839238325 | 0.942333902 |
| 4208 | CHEN_HOXA5_TARGETS_9HR_DN                     | 38  | Up   | 0.839482316 | 0.942333902 |
| 4209 | MOOTHA_GLUCONEOGENESIS                        | 25  | Up   | 0.83955231  | 0.942333902 |
| 4210 | ELVIDGE_HYPOXIA_DN                            | 142 | Down | 0.840174432 | 0.942333902 |
| 4211 | PID_IL2_STAT5_PATHWAY                         | 22  | Up   | 0.840222027 | 0.942333902 |
| 4212 | PID_P38_MK2_PATHWAY                           | 19  | Down | 0.840416786 | 0.942333902 |
| 4213 | VANTVEER_BREAST_CANCER_POOR_PROGNOSIS         | 47  | Down | 0.840428648 | 0.942333902 |
| 4214 | KREPEL_CD99_TARGETS_UP                        | 5   | Up   | 0.840518001 | 0.942333902 |
| 4215 | KIM_WT1_TARGETS_8HR_DN                        | 104 | Down | 0.840943966 | 0.942333902 |
| 4216 | REACTOME_SIGNALLING_TO_ERKS                   | 34  | Down | 0.840997244 | 0.942333902 |
| 4217 | DARWICHE_PAPILLOMA_RISK_LOW_DN                | 132 | Down | 0.841622223 | 0.942333902 |

|      | A                                                      | B         | C           | D                  | E                  |
|------|--------------------------------------------------------|-----------|-------------|--------------------|--------------------|
| 4218 | REACTOME_SHC1_EVENTS_IN_ERBB4_SIGNALING                | 16        | Down        | 0.841797091        | 0.942333902        |
| 4219 | JIANG_AGING_HYPOTHALAMUS_DN                            | 39        | Up          | 0.842031839        | 0.942333902        |
| 4220 | REACTOME_PI_METABOLISM                                 | 42        | Up          | 0.842418402        | 0.942333902        |
| 4221 | OSADA_ASCL1_TARGETS_UP                                 | 32        | Down        | 0.842658396        | 0.942333902        |
| 4222 | DACOSTA_ERCC3_ALLELE_XPCS_VS_TTD_UP                    | 24        | Up          | 0.842740433        | 0.942333902        |
| 4223 | REACTOME_DOUBLE_STRAND_BREAK_REPAIR                    | 22        | Down        | 0.842942152        | 0.942333902        |
| 4224 | <b>BOWIE_RESPONSE_TO_TAMOXIFEN</b>                     | <b>13</b> | <b>Down</b> | <b>0.843062824</b> | <b>0.942333902</b> |
| 4225 | HUPER_BREAST_BASAL_VS_LUMINAL_UP                       | 29        | Down        | 8.43E-01           | 9.42E-01           |
| 4226 | YAGI_AML_WITH_INV_16_TRANSLOCATION                     | 347       | Up          | 8.43E-01           | 9.42E-01           |
| 4227 | REACTOME_INCRETIN_SYNTHESIS_SECRETION_AND_INACTIVATION | 9         | Up          | 0.843205998        | 0.942333902        |
| 4228 | REACTOME_SYNTHESIS_SECRETION_AND_INACTIVATION_OF_GLP1  | 9         | Up          | 0.843205998        | 0.942333902        |
| 4229 | BIOCARTA_MEF2D_PATHWAY                                 | 17        | Down        | 0.843214336        | 0.942333902        |
| 4230 | SATO_SILENCED_BY_DEACETYLATION_IN_PANCREATIC_CANCER    | 35        | Down        | 0.843627083        | 0.942571126        |
| 4231 | <b>REACTOME_LAGGING_STRAND_SYNTHESIS</b>               | <b>19</b> | <b>Up</b>   | <b>0.843825579</b> | <b>0.942571126</b> |
| 4232 | GINESTIER_BREAST_CANCER_20Q13_AMPLIFICATION_UP         | 108       | Up          | 0.844087874        | 0.942641268        |
| 4233 | YANG_BREAST_CANCER_ESR1_LASER_UP                       | 31        | Down        | 0.844667364        | 0.942682786        |
| 4234 | LIAO_METASTASIS                                        | 503       | Up          | 0.844688496        | 0.942682786        |
| 4235 | REACTOME_CYTOSOLIC_SULFONATION_OF_SMALL_MOLECULES      | 9         | Up          | 0.84472358         | 0.942682786        |
| 4236 | IWANAGA_CARCINOGENESIS_BY_KRAS_DN                      | 95        | Down        | 0.844943182        | 0.942705203        |
| 4237 | BANDRES_RESPONSE_TO_CARMUSTIN_WITHOUT_MGMT_24HR_DN     | 9         | Up          | 0.845440226        | 0.94290103         |
| 4238 | YIH_RESPONSE_TO_ARSENITE_C1                            | 22        | Up          | 0.845517812        | 0.94290103         |
| 4239 | BENPORATH_ES_WITH_H3K27ME3                             | 587       | Down        | 0.846075684        | 0.942995291        |
| 4240 | PID_ALPHA_SYNUCLEIN_PATHWAY                            | 29        | Up          | 0.84624905         | 0.942995291        |
| 4241 | VERNOCHET_ADIPOGENESIS                                 | 8         | Up          | 0.846294955        | 0.942995291        |
| 4242 | RIZKI_TUMOR_INVASIVENESS_3D_DN                         | 213       | Down        | 0.846847548        | 0.942995291        |

|      | A                                                                  | B           | C         | D                  | E                  |
|------|--------------------------------------------------------------------|-------------|-----------|--------------------|--------------------|
| 4243 | BIOCARTA_P27_PATHWAY                                               | 13          | Up        | 0.846859276        | 0.942995291        |
| 4244 | LU_TUMOR_VASCULATURE_DN                                            | 7           | Up        | 0.846872425        | 0.942995291        |
| 4245 | IWANAGA_E2F1_TARGETS_INDUCED_BY_SERUM                              | 30          | Up        | 0.846999368        | 0.942995291        |
| 4246 | WONG_ENDMETRIUM_CANCER_UP                                          | 8           | Down      | 0.847294935        | 0.943102136        |
| 4247 | WANG_LSD1_TARGETS_DN                                               | 31          | Down      | 0.847739852        | 0.94337513         |
| 4248 | LEIN_CEREBELLUM_MARKERS                                            | 66          | Up        | 0.847969388        | 0.943408372        |
| 4249 | MEISSNER_ES_ICP_WITH_H3K4ME3_AND_H3K27<br>ME3                      | 9           | Down      | 0.848568347        | 0.943852505        |
| 4250 | MIKKELSEN_NPC_WITH_LCP_H3K27ME3                                    | 2           | Down      | 0.848782549        | 0.943868567        |
| 4251 | REACTOME_REGULATION_OF_RHEB_GTPASE_AC<br>TIVITY_BY_AMPK            | 9           | Up        | 0.849021437        | 0.943912068        |
| 4252 | CAFFAREL_RESPONSE_TO_THC_24HR_3_UP                                 | 7           | Down      | 0.849231704        | 0.943923736        |
| 4253 | YANAGISAWA_LUNG_CANCER_RECURRENCE                                  | 7           | Down      | 0.849673481        | 0.944192662        |
| 4254 | REACTOME_PROSTACYCLIN_SIGNALLING_THROU<br>GH_PROSTACYCLIN_RECEPTOR | 14          | Up        | 0.849932176        | 0.944258061        |
| 4255 | ALCALAY_AML_BY_NPM1_LOCALIZATION_DN                                | 157         | Up        | 0.850503116        | 0.944409287        |
| 4256 | YE_METASTATIC_LIVER_CANCER                                         | 19          | Down      | 0.850573563        | 0.944409287        |
| 4257 | REACTOME_PYRUVATE_METABOLISM_AND_CITRI<br>C_ACID_TCA_CYCLE         | 38          | Up        | 0.850667921        | 0.944409287        |
| 4258 | BENPORATH_NANOG_TARGETS                                            | 960         | Down      | 0.852526635        | 0.945697391        |
| 4259 | PARK_HSC_AND_MULTIPOTENT_PROGENITORS                               | 47          | Down      | 0.852575844        | 0.945697391        |
| 4260 | REACTOME_GAP_JUNCTION_TRAFFICKING                                  | 16          | Up        | 0.852796497        | 0.945697391        |
| 4261 | FARMER_BREAST_CANCER_CLUSTER_4                                     | 15          | Down      | 0.85289432         | 0.945697391        |
| 4262 | VERRECCHIA_RESPONSE_TO_TGFB1_C6                                    | 5           | Up        | 0.8530255          | 0.945697391        |
| 4263 | SEIDEN_MET_SIGNALING                                               | 18          | Down      | 0.853170118        | 0.945697391        |
| 4264 | PEDRIOLI_MIR31_TARGETS_UP                                          | 137         | Down      | 0.853426557        | 0.945697391        |
| 4265 | <b>GRAESSMANN_APOPTOSIS_BY_DOXORUBICIN_D<br/>N</b>                 | <b>1706</b> | <b>Up</b> | <b>0.853613443</b> | <b>0.945697391</b> |
| 4266 | KEGG_CALCIUM_SIGNALING_PATHWAY                                     | 122         | Down      | 8.54E-01           | 9.46E-01           |
| 4267 | MA_MYELOID_DIFFERENTIATION_UP                                      | 32          | Down      | 8.54E-01           | 9.46E-01           |
| 4268 | RODRIGUES_DCC_TARGETS_DN                                           | 110         | Up        | 0.854690115        | 0.946189318        |



|      | A                                                        | B    | C    | D           | E           |
|------|----------------------------------------------------------|------|------|-------------|-------------|
| 4269 | REACTOME_SIGNALING_BY_SCF_KIT                            | 71   | Up   | 0.854862186 | 0.946189318 |
| 4270 | BIOCARTA_CLASSIC_PATHWAY                                 | 6    | Down | 0.855411349 | 0.946189318 |
| 4271 | ZWANG_TRANSIENTLY_UP_BY_1ST_EGF_PULSE_ONLY               | 1343 | Down | 0.855792382 | 0.946189318 |
| 4272 | JI_CARCINOGENESIS_BY_KRAS_AND_STK11_UP                   | 5    | Down | 0.856064327 | 0.946189318 |
| 4273 | REACTOME_G1_S_TRANSITION                                 | 105  | Up   | 0.856065703 | 0.946189318 |
| 4274 | FUNG_IL2_SIGNALING_1                                     | 9    | Down | 0.856120654 | 0.946189318 |
| 4275 | BIOCARTA_ETS_PATHWAY                                     | 17   | Down | 0.856199508 | 0.946189318 |
| 4276 | SCHAEFFER_SOX9_TARGETS_IN_PROSTATE_DEVELOPMENT_UP        | 16   | Down | 0.85626932  | 0.946189318 |
| 4277 | LI_PROSTATE_CANCER_EPIGENETIC                            | 20   | Up   | 0.856276301 | 0.946189318 |
| 4278 | REACTOME_ASSEMBLY_OF_THE_PRE_REPLICATIVE_COMPLEX         | 62   | Down | 0.856813575 | 0.946350404 |
| 4279 | BURTON_ADIPOGENESIS_5                                    | 121  | Up   | 0.85693572  | 0.946350404 |
| 4280 | MUELLER_COMMON_TARGETS_OF_AML_FUSIONS_DN                 | 22   | Up   | 0.857180985 | 0.946350404 |
| 4281 | REACTOME_G0_AND_EARLY_G1                                 | 23   | Down | 0.857223223 | 0.946350404 |
| 4282 | LUDWICZEK_TREATING_IRON_OVERLOAD                         | 4    | Up   | 0.858399887 | 0.947064349 |
| 4283 | MCCLUNG_CREB1_TARGETS_DN                                 | 49   | Down | 0.858422925 | 0.947064349 |
| 4284 | REACTOME_GABA_SYNTHESIS_RELEASE_REUPTAKE_AND_DEGRADATION | 12   | Down | 0.858471239 | 0.947064349 |
| 4285 | BRACHAT_RESPONSE_TO_CAMPTOTHECIN_UP                      | 28   | Up   | 0.858706912 | 0.947103212 |
| 4286 | REACTOME_SIGNALING_BY_EGFR_IN_CANCER                     | 102  | Down | 0.85916811  | 0.94739074  |
| 4287 | GENTILE_UV_RESPONSE_CLUSTER_D7                           | 40   | Down | 0.859665596 | 0.947718138 |
| 4288 | CEBALLOS_TARGETS_OF_TP53_AND_MYC_DN                      | 30   | Down | 0.860335587 | 0.948154562 |
| 4289 | REACTOME_RIP_MEDIATED_NFKB_ACTIVATION_VIA_DAI            | 13   | Down | 0.86052221  | 0.948154562 |
| 4290 | KEGG_NATURAL_KILLER_CELL_MEDIATED_CYTOTOXICITY           | 74   | Up   | 0.860663474 | 0.948154562 |
| 4291 | DACOSTA_UV_RESPONSE_VIA_ERCC3_UP                         | 296  | Up   | 0.861348316 | 0.948687831 |
| 4292 | LOPES_METHYLATED_IN_COLON_CANCER_UP                      | 13   | Up   | 0.861858308 | 0.949028316 |
| 4293 | HAHTOLA_CTCL_CUTANEOUS                                   | 19   | Up   | 0.862393475 | 0.949313405 |

|      | A                                                                                     | B         | C           | D                  | E                  |
|------|---------------------------------------------------------------------------------------|-----------|-------------|--------------------|--------------------|
| 4294 | GROSS_HYPOXIA_VIA_HIF1A_UP                                                            | 75        | Down        | 0.862519036        | 0.949313405        |
| 4295 | REACTOME_RNA_POL_I_TRANSCRIPTION_TERMINATION                                          | 19        | Down        | 0.862917606        | 0.949331258        |
| 4296 | KEGG_CELL_ADHESION_MOLECULES_CAMS                                                     | 87        | Up          | 0.862967521        | 0.949331258        |
| 4297 | REACTOME_ANTIGEN_ACTIVATES_B_CELL_RECEPTOR_LEADING_TO_GENERATION_OF_SECOND_MESSENGERS | 24        | Up          | 0.863154472        | 0.949331258        |
| 4298 | GOUYER_TATI_TARGETS_UP                                                                | 5         | Down        | 0.863508942        | 0.949331258        |
| 4299 | SAKAI_TUMOR_INFILTRATING_MONOCYTES_DN                                                 | 73        | Up          | 0.863539841        | 0.949331258        |
| 4300 | GUTIERREZ_MULTIPLE_MYELOMA_UP                                                         | 35        | Down        | 0.863768789        | 0.949362068        |
| 4301 | KEGG_NOD_LIKE_RECEPTOR_SIGNALING_PATHWAY                                              | 38        | Down        | 0.864046123        | 0.949401586        |
| 4302 | PID_TGFBR_PATHWAY                                                                     | 52        | Down        | 0.864206607        | 0.949401586        |
| 4303 | KEGG_NON_SMALL_CELL_LUNG_CANCER                                                       | 49        | Up          | 0.865351539        | 0.949937806        |
| 4304 | SEIKE_LUNG_CANCER_POOR_SURVIVAL                                                       | 2         | Down        | 0.865351707        | 0.949937806        |
| 4305 | KIM_PTEN_TARGETS_DN                                                                   | 5         | Down        | 0.865359085        | 0.949937806        |
| 4306 | <b>TURASHVILI_BREAST_CARCINOMA_DUCTAL_VS_LOBULAR_UP</b>                               | <b>16</b> | <b>Down</b> | <b>0.865939742</b> | <b>0.949937806</b> |
| 4307 | MARIADASON_RESPONSE_TO_BUTYRATE_CURCUMIN_SULINDAC_TSA_8                               | 13        | Down        | 8.66E-01           | 9.50E-01           |
| 4308 | INAMURA_LUNG_CANCER_SCC_UP                                                            | 10        | Up          | 8.66E-01           | 9.50E-01           |
| 4309 | MYLLYKANGAS_AMPLIFICATION_HOT_SPOT_1                                                  | 1         | Up          | 0.866270126        | 0.949937806        |
| 4310 | MULLIGAN_NTF3_SIGNALING_VIA_INSR_AND_IGF1R_UP                                         | 21        | Up          | 0.866480975        | 0.949937806        |
| 4311 | REACTOME_CREATION_OF_C4_AND_C2_ACTIVATORS                                             | 2         | Up          | 0.86663023         | 0.949937806        |
| 4312 | KEGG_PURINE_METABOLISM                                                                | 134       | Up          | 0.86670516         | 0.949937806        |
| 4313 | ZIRN_TRETINOIN_RESPONSE_DN                                                            | 4         | Up          | 0.867218304        | 0.950230195        |
| 4314 | MATZUK_MALE_REPRODUCTION_SERTOLI                                                      | 18        | Up          | 0.867374144        | 0.950230195        |
| 4315 | MOOTHA_MITOCHONDRIA                                                                   | 413       | Down        | 0.867960465        | 0.950652109        |
| 4316 | PID_ATR_PATHWAY                                                                       | 38        | Up          | 0.86849441         | 0.951016474        |

|      | A                                                                                 | B   | C    | D           | E           |
|------|-----------------------------------------------------------------------------------|-----|------|-------------|-------------|
| 4317 | REACTOME_ADAPTIVE_IMMUNE_SYSTEM                                                   | 419 | Down | 0.868805859 | 0.95113709  |
| 4318 | REACTOME_OXYGEN_DEPENDENT_PROLINE_HYDROXYLATION_OF_HYPOXIA_INDUCIBLE_FACTOR_ALPHA | 16  | Up   | 0.869153576 | 0.951297347 |
| 4319 | NING_CHRONIC_OBSTRUCTIVE_PULMONARY_DISEASE_UP                                     | 131 | Up   | 0.869750133 | 0.951560715 |
| 4320 | BROWNE_HCMV_INFECTION_4HR_UP                                                      | 41  | Up   | 0.869796979 | 0.951560715 |
| 4321 | BIOCARTA_MET_PATHWAY                                                              | 35  | Up   | 0.870593353 | 0.951843582 |
| 4322 | DUAN_PRDM5_TARGETS                                                                | 65  | Up   | 0.871057051 | 0.951843582 |
| 4323 | REACTOME_REGULATION_OF_BETA_CELL_DEVELOPMENT                                      | 15  | Down | 0.871097934 | 0.951843582 |
| 4324 | BOSCO_EPITHELIAL_DIFFERENTIATION_MODULE                                           | 31  | Down | 0.87118047  | 0.951843582 |
| 4325 | VALK_AML_WITH_11Q23_REARRANGED                                                    | 16  | Up   | 0.871376498 | 0.951843582 |
| 4326 | REACTOME_G_BETA_GAMMA_SIGNALING_THROUGH_PI3KGAMMA                                 | 19  | Down | 0.87151199  | 0.951843582 |
| 4327 | PETRETTO_HEART_MASS_QTL_CIS_DN                                                    | 20  | Down | 0.871953562 | 0.951843582 |
| 4328 | BILD_CTNNB1_ONCOGENIC_SIGNATURE                                                   | 76  | Up   | 0.872022497 | 0.951843582 |
| 4329 | VANHARANTA_UTERINE_FIBROID_WITH_7Q_DELETION_DN                                    | 35  | Up   | 0.872167284 | 0.951843582 |
| 4330 | PID_RB_1PATHWAY                                                                   | 53  | Down | 0.872433941 | 0.951843582 |
| 4331 | KEGG_MISMATCH_REPAIR                                                              | 22  | Up   | 0.872468494 | 0.951843582 |
| 4332 | IGLESIAS_E2F_TARGETS_DN                                                           | 7   | Down | 0.872472921 | 0.951843582 |
| 4333 | GALE_APL_WITH_FLT3_MUTATED_DN                                                     | 15  | Down | 0.872889177 | 0.952077877 |
| 4334 | MAEKAWA_ATF2_TARGETS                                                              | 12  | Down | 0.874527778 | 0.953446467 |
| 4335 | REACTOME_INTEGRIN_ALPHAIIIB_BETA3_SIGNALING                                       | 22  | Up   | 0.874599198 | 0.953446467 |
| 4336 | LEE_LIVER_CANCER_SURVIVAL_DN                                                      | 169 | Up   | 0.874749298 | 0.953446467 |
| 4337 | LU_AGING_BRAIN_DN                                                                 | 138 | Up   | 0.875854596 | 0.954431035 |
| 4338 | JI_RESPONSE_TO_FSH_DN                                                             | 57  | Up   | 0.876098982 | 0.954477217 |
| 4339 | REACTOME_ACTIVATION_OF_BH3_ONLY_PROTEINS                                          | 16  | Up   | 0.876699716 | 0.95459499  |

|      | A                                                        | B         | C         | D                  | E                  |
|------|----------------------------------------------------------|-----------|-----------|--------------------|--------------------|
| 4340 | HAHTOLA_MYCOSIS_FUNGOIDES_UP                             | 14        | Down      | 0.87673647         | 0.95459499         |
| 4341 | VANTVEER_BREAST_CANCER_ESR1_UP                           | 151       | Down      | 0.876928471        | 0.95459499         |
| 4342 | ALONSO_METASTASIS_DN                                     | 15        | Up        | 0.877177648        | 0.95459499         |
| 4343 | IIZUKA_LIVER_CANCER_PROGRESSION_L1_G1_UP                 | 19        | Up        | 0.87748647         | 0.95459499         |
| 4344 | RUAN_RESPONSE_TO_TNF_TROGLITAZONE_UP                     | 10        | Up        | 0.877588173        | 0.95459499         |
| 4345 | SCHMAHL_PDGF_SIGNALING                                   | 9         | Up        | 0.877621298        | 0.95459499         |
| 4346 | ZEMBUTSU_SENSITIVITY_TO_FLUOROURACIL                     | 13        | Down      | 0.877989329        | 0.954703696        |
| 4347 | <b>SCHAEFFER_PROSTATE_DEVELOPMENT_AND_CANCER_BOX4_DN</b> | <b>32</b> | <b>Up</b> | <b>0.878341469</b> | <b>0.954703696</b> |
| 4348 | TIAN_BHLHA15_TARGETS                                     | 15        | Down      | 8.78E-01           | 9.55E-01           |
| 4349 | KEGG_ALZHEIMERS_DISEASE                                  | 149       | Down      | 8.79E-01           | 9.55E-01           |
| 4350 | WANG_TUMOR_INVASIVENESS_UP                               | 356       | Down      | 0.879039019        | 0.95496            |
| 4351 | KLEIN_PRIMARY EFFUSION_LYMPHOMA_UP                       | 44        | Up        | 0.879169524        | 0.95496            |
| 4352 | GRESHOCK_CANCER_COPY_NUMBER_UP                           | 274       | Down      | 0.879394268        | 0.954984582        |
| 4353 | SHEPARD_BMYB_MORPHOLINO_UP                               | 180       | Up        | 0.879694198        | 0.955083961        |
| 4354 | REACTOME_PROLACTIN_RECEPTOR_SIGNALING                    | 9         | Up        | 0.880181701        | 0.955083961        |
| 4355 | NUTT_GBM_VS_AO_GLIOMA_UP                                 | 43        | Up        | 0.880219659        | 0.955083961        |
| 4356 | SCHWAB_TARGETS_OF_BMYB_POLYMORPHIC_VARIANTS_DN           | 14        | Down      | 0.880294318        | 0.955083961        |
| 4357 | REACTOME_MEMBRANE_BINDING_AND_TARGETING_OF_GAG_PROTEINS  | 9         | Down      | 0.880657045        | 0.955258158        |
| 4358 | KEGG_CHEMOKINE_SIGNALING_PATHWAY                         | 121       | Up        | 0.880877864        | 0.955278382        |
| 4359 | IVANOVA_HEMATOPOIESIS_EARLY_PROGENITOR                   | 475       | Up        | 0.881573189        | 0.95581306         |
| 4360 | KONG_E2F1_TARGETS                                        | 8         | Up        | 0.88192862         | 0.955979061        |
| 4361 | KIM_MYCL1_AMPLIFICATION_TARGETS_UP                       | 13        | Down      | 0.882136398        | 0.955984973        |
| 4362 | BIOCARTA_HER2_PATHWAY                                    | 19        | Up        | 0.883652795        | 0.956389132        |
| 4363 | STREICHER_LSM1_TARGETS_DN                                | 14        | Up        | 0.883817262        | 0.956389132        |
| 4364 | POMEROY_MEDULLOBLASTOMA_DESMOPLASIC_VS_CLASSIC_DN        | 54        | Down      | 0.88402293         | 0.956389132        |
| 4365 | TESAR_ALK_TARGETS_HUMAN_ES_4D_DN                         | 6         | Up        | 0.884412977        | 0.956389132        |

|      | A                                                       | B          | C           | D                  | E                  |
|------|---------------------------------------------------------|------------|-------------|--------------------|--------------------|
| 4366 | BIOCARTA_COMP_PATHWAY                                   | 7          | Down        | 0.884488737        | 0.956389132        |
| 4367 | OXFORD_RALA_TARGETS_DN                                  | 10         | Down        | 0.884643482        | 0.956389132        |
| 4368 | BIOCARTA_EGFR_SMRTE_PATHWAY                             | 10         | Down        | 0.884913086        | 0.956389132        |
| 4369 | BIOCARTA_IL7_PATHWAY                                    | 13         | Down        | 0.885198246        | 0.956389132        |
| 4370 | MYLLYKANGAS_AMPLIFICATION_HOT_SPOT_24                   | 9          | Down        | 0.885356934        | 0.956389132        |
| 4371 | REACTOME_PD1_SIGNALING                                  | 8          | Down        | 0.885597072        | 0.956389132        |
| 4372 | VALK_AML_WITH_FLT3_ITD                                  | 28         | Up          | 0.885698936        | 0.956389132        |
| 4373 | YAO_TEMPORAL_RESPONSE_TO_PROGESTERONE_CLUSTER_15        | 29         | Down        | 0.885791749        | 0.956389132        |
| 4374 | MCMURRAY_TP53_HRAS_COOPERATION_RESPONSE_DN              | 59         | Up          | 0.885995964        | 0.956389132        |
| 4375 | BIOCARTA_ECM_PATHWAY                                    | 22         | Up          | 0.886083912        | 0.956389132        |
| 4376 | PID_E2F_PATHWAY                                         | 65         | Down        | 0.886086432        | 0.956389132        |
| 4377 | JI_CARCINOGENESIS_BY_KRAS_AND_STK11_DN                  | 11         | Down        | 0.886087541        | 0.956389132        |
| 4378 | LI_WILMS_TUMOR_ANAPLASTIC_DN                            | 4          | Down        | 0.886224841        | 0.956389132        |
| 4379 | MURAKAMI_UV_RESPONSE_24HR                               | 12         | Up          | 0.886345223        | 0.956389132        |
| 4380 | MAGRANGEAS_MULTIPLE_MYELOMA_IGG_VS_IGA_DN               | 16         | Up          | 0.886408463        | 0.956389132        |
| 4381 | BIOCARTA_AGR_PATHWAY                                    | 31         | Up          | 0.886606017        | 0.956389132        |
| 4382 | MYLLYKANGAS_AMPLIFICATION_HOT_SPOT_9                    | 8          | Up          | 0.886807058        | 0.956389132        |
| 4383 | REACTOME_PI3K_EVENTS_IN_ERBB4_SIGNALING                 | 32         | Up          | 0.886968506        | 0.956389132        |
| 4384 | RHEIN_ALL_GLUCCORTICOID_THERAPY_DN                      | 352        | Down        | 0.887428897        | 0.956389132        |
| 4385 | REACTOME_MEIOTIC_RECOMBINATION                          | 46         | Down        | 0.887454604        | 0.956389132        |
| 4386 | SARTIPY_NORMAL_AT_INSULIN_RESISTANCE_DN                 | 18         | Down        | 0.887569597        | 0.956389132        |
| 4387 | SCHLESINGER_H3K27ME3_IN_NORMAL_AND_METHYLATED_IN_CANCER | 15         | Down        | 0.887880859        | 0.956506397        |
| 4388 | <b>PENG_Glutamine_Deprivation_DN</b>                    | <b>326</b> | <b>Down</b> | <b>0.888352498</b> | <b>0.956599186</b> |
| 4389 | MIKKELSEN_DEDIFFERENTIATED_STATE_DN                     | 5          | Down        | 8.88E-01           | 9.57E-01           |
| 4390 | SHIN_B_CELL_LYMPHOMA_CLUSTER_9                          | 7          | Down        | 8.89E-01           | 9.57E-01           |
| 4391 | ASTON_MAJOR_DEPRESSIVE_DISORDER_DN                      | 135        | Up          | 0.889671568        | 0.957562223        |

|      | A                                                           | B   | C    | D           | E           |
|------|-------------------------------------------------------------|-----|------|-------------|-------------|
| 4392 | REACTOME_REGULATION_OF_GENE_EXPRESSION_IN_BETA_CELLS        | 9   | Down | 0.890061842 | 0.957764109 |
| 4393 | RAMPON_ENRICHED_LEARNING_ENVIRONMENT_LATE_UP                | 21  | Up   | 0.890402763 | 0.95781116  |
| 4394 | PID_RAC1_REG_PATHWAY                                        | 38  | Up   | 0.891035344 | 0.95781116  |
| 4395 | ST_GA12_PATHWAY                                             | 17  | Down | 0.891410672 | 0.95781116  |
| 4396 | KATSANOUELAVL1_TARGETS_DN                                   | 123 | Down | 0.891526728 | 0.95781116  |
| 4397 | BIOCARTA_LYM_PATHWAY                                        | 4   | Up   | 0.891598856 | 0.95781116  |
| 4398 | REACTOME_PIP3_ACTIVATES_AKT_SIGNALING                       | 27  | Up   | 0.891634108 | 0.95781116  |
| 4399 | KEGG_OLFACTORY_TRANSDUCTION                                 | 16  | Down | 0.891667105 | 0.95781116  |
| 4400 | KEGG_ACUTE_MYELOID_LEUKEMIA                                 | 52  | Up   | 0.891727258 | 0.95781116  |
| 4401 | DACOSTA_UV_RESPONSE_VIA_ERCC3_COMMON_UP                     | 73  | Up   | 0.892559231 | 0.958486901 |
| 4402 | REACTOME_SIGNALING_BY_NGF                                   | 201 | Up   | 0.893267744 | 0.95902061  |
| 4403 | REACTOME_APOPTOSIS                                          | 129 | Up   | 0.893661179 | 0.95902061  |
| 4404 | KUROKAWA_LIVER_CANCER_CHEMOTHERAPY_UP                       | 11  | Up   | 0.893803007 | 0.95902061  |
| 4405 | SCHAEFFER_PROSTATE_DEVELOPMENT_AND_CANCER_BOX5_DN           | 7   | Down | 0.893868099 | 0.95902061  |
| 4406 | BYSTROEM_CORRELATED_WITH_IL5_DN                             | 57  | Up   | 0.894250073 | 0.959026814 |
| 4407 | REACTOME_CTLA4_INHIBITORY_SIGNALING                         | 18  | Up   | 0.894613283 | 0.959026814 |
| 4408 | MULLIGHAN_NPM1_MUTATED_SIGNATURE_2_UP                       | 113 | Up   | 0.894727408 | 0.959026814 |
| 4409 | KYNG_WERNER_SYNDROME_AND_NORMAL_AGING_DN                    | 196 | Up   | 0.894887935 | 0.959026814 |
| 4410 | REACTOME_DOWNSTREAM_SIGNALING_EVENTS_OF_B_CELL_RECEPTOR_BCR | 90  | Down | 0.894889279 | 0.959026814 |
| 4411 | XU_HGF_TARGETS_INDUCED_BY_AKT1_48HR_UP                      | 12  | Down | 0.895091693 | 0.959026814 |
| 4412 | REACTOME_POST_NMDA_RECEPTOR_ACTIVATION_EVENTS               | 30  | Down | 0.895762775 | 0.95952825  |
| 4413 | KLEIN_TARGETS_OF_BCR_ABL1_FUSION                            | 23  | Up   | 0.896128236 | 0.959702156 |

|      | A                                                             | B         | C           | D                  | E                  |
|------|---------------------------------------------------------------|-----------|-------------|--------------------|--------------------|
| 4414 | REACTOME_GLUCURONIDATION                                      | 3         | Down        | 0.896483595        | 0.959711128        |
| 4415 | KEGG_GLYCOSYLPHOSPHATIDYLINOSITOL_GPI_A<br>NCHOR_BIOSYNTHESIS | 23        | Up          | 0.89654284         | 0.959711128        |
| 4416 | REACTOME_PI3K_CASCADE                                         | 52        | Up          | 0.897404174        | 0.960133133        |
| 4417 | KANG_GLIS3_TARGETS                                            | 16        | Down        | 0.897499179        | 0.960133133        |
| 4418 | REACTOME_DCC_MEDIATED_ATTRACTIVE_SIGNA<br>LING                | 13        | Down        | 0.897546677        | 0.960133133        |
| 4419 | BOYLAN_MULTIPLE_MYELOMA_C_D_UP                                | 129       | Up          | 0.897780574        | 0.96016596         |
| 4420 | SMID_BREAST_CANCER_LUMINAL_B_UP                               | 134       | Down        | 0.899321814        | 0.960859915        |
| 4421 | HAHTOLA_MYCOSIS_FUNGOIDES_CD4_DN                              | 111       | Down        | 0.899539489        | 0.960859915        |
| 4422 | HADDAD_T_LYMPHOCYTE_AND_NK_PROGENITOR<br>_DN                  | 28        | Up          | 0.899906982        | 0.960859915        |
| 4423 | XU_HGF_TARGETS_REPRESSED_BY_AKT1_UP                           | 8         | Up          | 0.899954499        | 0.960859915        |
| 4424 | PID_TCR_RAS_PATHWAY                                           | 13        | Up          | 0.900004347        | 0.960859915        |
| 4425 | PID_TELOMERASE_PATHWAY                                        | 63        | Down        | 0.900209124        | 0.960859915        |
| 4426 | BIOCARTA_BARRESTIN_PATHWAY                                    | 9         | Down        | 0.900363674        | 0.960859915        |
| 4427 | DAZARD_UV_RESPONSE_CLUSTER_G24                                | 17        | Down        | 0.900468276        | 0.960859915        |
| 4428 | KENNY_CTNNB1_TARGETS_UP                                       | 41        | Down        | 0.900577306        | 0.960859915        |
| 4429 | <b>BIOCARTA_TCAPOPTOSIS_PATHWAY</b>                           | <b>2</b>  | <b>Down</b> | <b>0.901131268</b> | <b>0.960859915</b> |
| 4430 | REACTOME_NEUROTRANSMITTER_RELEASE_CYC<br>LE                   | 24        | Up          | 9.01E-01           | 9.61E-01           |
| 4431 | MEISSNER_BRAIN_ICP_WITH_H3K4ME3                               | 30        | Down        | 9.01E-01           | 9.61E-01           |
| 4432 | PID_IL12_2PATHWAY                                             | 35        | Up          | 0.901600741        | 0.960859915        |
| 4433 | RODRIGUES_THYROID_CARCINOMA_DN                                | 68        | Down        | 0.901662425        | 0.960859915        |
| 4434 | MCGOWAN_RSP6_TARGETS_UP                                       | 14        | Up          | 0.901690362        | 0.960859915        |
| 4435 | JAZAERI_BREAST_CANCER_BRCA1_VS_BRCA2_UP                       | 45        | Down        | 0.901709813        | 0.960859915        |
| 4436 | <b>WILLIAMS_ESR2_TARGETS_DN</b>                               | <b>11</b> | <b>Up</b>   | <b>0.901886502</b> | <b>0.960859915</b> |
| 4437 | REACTOME_SIGNALLING_TO_RAS                                    | 25        | Up          | 0.902235539        | 0.960947871        |
| 4438 | PATIL_LIVER_CANCER                                            | 696       | Down        | 0.90237581         | 0.960947871        |
| 4439 | REACTOME_NEPHRIN_INTERACTIONS                                 | 17        | Down        | 0.90280556         | 0.961188885        |
| 4440 | HOLLEMAN_DAUNORUBICIN_B_ALL_UP                                | 6         | Down        | 0.903783731        | 0.962013546        |

|      | A                                             | B   | C    | D           | E           |
|------|-----------------------------------------------|-----|------|-------------|-------------|
| 4441 | KAPOSI_LIVER_CANCER_MET_DN                    | 5   | Up   | 0.904120112 | 0.962154849 |
| 4442 | REN_MIF_TARGETS_DN                            | 2   | Up   | 0.904673497 | 0.962526969 |
| 4443 | WEBER_METHYLATED_HCP_IN_SPERM_DN              | 7   | Up   | 0.905347355 | 0.962613932 |
| 4444 | REACTOME_CLASS_B_2_SECRETIN_FAMILY_RECEPTORS  | 47  | Up   | 0.905665108 | 0.962613932 |
| 4445 | FIRESTEIN_PROLIFERATION                       | 147 | Up   | 0.9056803   | 0.962613932 |
| 4446 | PID_TOLL_ENDOGENOUS_PATHWAY                   | 16  | Up   | 0.905703676 | 0.962613932 |
| 4447 | TRACEY_RESISTANCE_TO_IFNA2_UP                 | 5   | Down | 0.905773872 | 0.962613932 |
| 4448 | MARTIN_INTERACT_WITH_HDAC                     | 38  | Down | 0.906470063 | 0.962706484 |
| 4449 | BIOCARTA_CSK_PATHWAY                          | 14  | Up   | 0.906510012 | 0.962706484 |
| 4450 | BIOCARTA_IGF1R_PATHWAY                        | 22  | Up   | 0.906529273 | 0.962706484 |
| 4451 | PID_TXA2PATHWAY                               | 46  | Up   | 0.906767777 | 0.962706484 |
| 4452 | REACTOME_SHC1_EVENTS_IN_EGFR_SIGNALING        | 15  | Up   | 0.906879695 | 0.962706484 |
| 4453 | MCCABE_HOXC6_TARGETS_CANCER_DN                | 20  | Up   | 0.907858099 | 0.963528643 |
| 4454 | JAZAG_TGFB1_SIGNALING_VIA_SMAD4_UP            | 81  | Down | 0.908260671 | 0.963719219 |
| 4455 | REACTOME_REGULATION_OF_AMPK_ACTIVITY_VIA_LKB1 | 13  | Up   | 0.908727869 | 0.963719219 |
| 4456 | SHARMA_PILOCYTIC_ASTROCYTOMA_LOCATION_UP      | 16  | Up   | 0.908738948 | 0.963719219 |
| 4457 | WANG_THOC1_TARGETS_UP                         | 4   | Up   | 0.908853511 | 0.963719219 |
| 4458 | ONGUSAHA_BRCA1_TARGETS_DN                     | 12  | Up   | 0.909101739 | 0.963766147 |
| 4459 | VANTVEER_BREAST_CANCER_METASTASIS_UP          | 47  | Up   | 0.909669124 | 0.964038315 |
| 4460 | CREIGHTON_AKT1_SIGNALING_VIA_MTOR_UP          | 33  | Up   | 0.909766528 | 0.964038315 |
| 4461 | BANDRES_RESPONSE_TO_CARMUSTIN_MGMT_24HR_UP    | 8   | Down | 0.910176378 | 0.964256365 |
| 4462 | CLAUS_PGR_POSITIVE_MENINGIOMA_UP              | 9   | Up   | 0.910572241 | 0.964291738 |
| 4463 | PID_WNT_CANONICAL_PATHWAY                     | 19  | Up   | 0.910617933 | 0.964291738 |
| 4464 | MAHAJAN_RESPONSE_TO_IL1A_UP                   | 56  | Down | 0.911516    | 0.965026462 |
| 4465 | REACTOME_HS_GAG_DEGRADATION                   | 18  | Up   | 0.912366905 | 0.965710938 |
| 4466 | IIZUKA_LIVER_CANCER_PROGRESSION_LO_L1_DN      | 20  | Down | 0.912687109 | 0.965833503 |



|      | A                                                             | B         | C         | D                  | E                  |
|------|---------------------------------------------------------------|-----------|-----------|--------------------|--------------------|
| 4467 | BERTUCCI_INVASIVE_CARCINOMA_DUCTAL_VS_L<br>OBULAR_DN          | 30        | Down      | 0.913674962        | 0.966662381        |
| 4468 | KORKOLA_CHORIOCARCINOMA_DN                                    | 6         | Down      | 0.913986115        | 0.966750102        |
| 4469 | KEGG_ABC_TRANSPORTERS                                         | 27        | Up        | 0.914310209        | 0.966750102        |
| 4470 | <b>ROZANOV_MMP14_CORRELATED</b>                               | <b>11</b> | <b>Up</b> | <b>0.914371683</b> | <b>0.966750102</b> |
| 4471 | GEORGES_CELL_CYCLE_MIR192_TARGETS                             | 60        | Down      | 9.15E-01           | 9.67E-01           |
| 4472 | WEBER_METHYLATED_IN_COLON_CANCER                              | 10        | Up        | 9.15E-01           | 9.67E-01           |
| 4473 | GRAESSMANN_RESPONSE_TO_MC_AND_DOXOR<br>UBICIN_DN              | 742       | Up        | 0.91527817         | 0.967059336        |
| 4474 | LIU_SOX4_TARGETS_DN                                           | 294       | Up        | 0.915535324        | 0.967114779        |
| 4475 | OUYANG_PROSTATE_CANCER_MARKERS                                | 18        | Down      | 0.916277682        | 0.967568804        |
| 4476 | REACTOME_ASPARAGINE_N_LINKED_GLYCOSYLA<br>TION                | 80        | Up        | 0.916480236        | 0.967568804        |
| 4477 | <b>JEON_SMAD6_TARGETS_DN</b>                                  | <b>18</b> | <b>Up</b> | <b>0.916579464</b> | <b>0.967568804</b> |
| 4478 | ZEMBUTSU_SENSITIVITY_TO_CYCLOPHOSPHAMID<br>E                  | 15        | Down      | 0.917381199        | 0.968153157        |
| 4479 | WU_HBX_TARGETS_1_DN                                           | 20        | Up        | 0.917646243        | 0.968153157        |
| 4480 | REACTOME_G_PROTEIN_BETA_GAMMA_SIGNALL<br>ING                  | 22        | Down      | 0.917825974        | 0.968153157        |
| 4481 | REACTOME_ENERGY_DEPENDENT_REGULATION_<br>OF_MTOR_BY_LKB1_AMPK | 16        | Up        | 0.917952623        | 0.968153157        |
| 4482 | LIU_COMMON_CANCER_GENES                                       | 71        | Down      | 0.918686401        | 0.968710833        |
| 4483 | LOPEZ_MBD_TARGETS                                             | 860       | Down      | 0.919736949        | 0.969540469        |
| 4484 | MCCLUNG_COCAIN_REWARD_4WK                                     | 55        | Down      | 0.919883581        | 0.969540469        |
| 4485 | MIZUSHIMA_AUTOPHAGOSOME_FORMATION                             | 19        | Up        | 0.920418114        | 0.969767882        |
| 4486 | DARWICHE_SKIN_TUMOR_PROMOTER_UP                               | 112       | Up        | 0.920620324        | 0.969767882        |
| 4487 | BYSTRYKH_HEMATOPOIESIS_STEM_CELL_FGF3                         | 7         | Up        | 0.920715073        | 0.969767882        |
| 4488 | REACTOME_IRAK1_RECRUITS_IKK_COMPLEX                           | 9         | Up        | 0.921294234        | 0.970161635        |
| 4489 | REACTOME_SIGNAL_AMPLIFICATION                                 | 24        | Up        | 0.921566544        | 0.970232157        |
| 4490 | IIZUKA_LIVER_CANCER_PROGRESSION_L1_G1_D<br>N                  | 11        | Down      | 0.921939262        | 0.970408334        |
| 4491 | PID_ECADHERIN_KERATINOCYTE_PATHWAY                            | 20        | Down      | 0.922147508        | 0.970411353        |

|      | A                                                                                                                           | B         | C         | D                  | E                  |
|------|-----------------------------------------------------------------------------------------------------------------------------|-----------|-----------|--------------------|--------------------|
| 4492 | DARWICHE_SQUAMOUS_CELL_CARCINOMA_DN                                                                                         | 142       | Up        | 0.922826577        | 0.970909725        |
| 4493 | REACTOME_BIOSYNTHESIS_OF_THE_N_GLYCAN_PRECURSOR_DOLICHOL_LIPID_LINKED_OLIGOSACCHARIDE_LLO_AND_TRANSFER_TO_A_NASCENT_PROTEIN | 28        | Down      | 0.923281614        | 0.971153129        |
| 4494 | BIOCARTA_ARF_PATHWAY                                                                                                        | 14        | Down      | 0.923468997        | 0.971153129        |
| 4495 | DAZARD_UV_RESPONSE_CLUSTER_G4                                                                                               | 19        | Up        | 0.923836209        | 0.971323116        |
| 4496 | REICHERT_G1S_REGULATORS_AS_PI3K_TARGETS                                                                                     | 8         | Down      | 0.924281167        | 0.971574753        |
| 4497 | ELVIDGE_HIF1A_TARGETS_DN                                                                                                    | 86        | Up        | 0.924683334        | 0.971616636        |
| 4498 | CHEN_NEUROBLASTOMA_COPY_NUMBER_GAINS                                                                                        | 40        | Down      | 0.924732278        | 0.971616636        |
| 4499 | REACTOME_INTERACTION_BETWEEN_L1_AND_A_NKYRINS                                                                               | 18        | Down      | 0.926166558        | 0.972907289        |
| 4500 | MARKS_HDAC_TARGETS_UP                                                                                                       | 18        | Up        | 0.927452986        | 0.97330378         |
| 4501 | HADDAD_B_LYMPHOCYTE_PROGENITOR                                                                                              | 230       | Down      | 0.927561938        | 0.97330378         |
| 4502 | BIOCARTA_TRKA_PATHWAY                                                                                                       | 10        | Up        | 0.927731858        | 0.97330378         |
| 4503 | BENPORATH_EED_TARGETS                                                                                                       | 571       | Down      | 0.927748968        | 0.97330378         |
| 4504 | BIOCARTA_CDK5_PATHWAY                                                                                                       | 10        | Up        | 0.927759995        | 0.97330378         |
| 4505 | MIKKELSEN_MEF_ICP_WITH_H3K4ME3_AND_H3K27ME3                                                                                 | 26        | Up        | 0.927779941        | 0.97330378         |
| 4506 | TERAMOTO_OPN_TARGETS_CLUSTER_5                                                                                              | 7         | Up        | 0.928293772        | 0.973626653        |
| 4507 | PID_ALK2_PATHWAY                                                                                                            | 8         | Down      | 0.928892704        | 0.974038621        |
| 4508 | ITO_PTTG1_TARGETS_DN                                                                                                        | 9         | Up        | 0.92934005         | 0.974291488        |
| 4509 | SU_LIVER                                                                                                                    | 16        | Up        | 0.929572826        | 0.974319344        |
| 4510 | BARRIER_CANCER_RELAPSE_NORMAL_SAMPLE_UP                                                                                     | 23        | Down      | 0.930430023        | 0.974691653        |
| 4511 | <b>REACTOME_OPIOID_SIGNALLING</b>                                                                                           | <b>66</b> | <b>Up</b> | <b>0.930759837</b> | <b>0.974691653</b> |
| 4512 | MARCHINI TRABECTEDIN_RESISTANCE_UP                                                                                          | 20        | Down      | 9.31E-01           | 9.75E-01           |
| 4513 | CHEMELLO_SOLEUS_VS_EDL_MYOFIBERS_UP                                                                                         | 21        | Down      | 9.31E-01           | 9.75E-01           |
| 4514 | INAMURA_LUNG_CANCER_SCC_DN                                                                                                  | 11        | Up        | 0.931351581        | 0.974691653        |

|      | A                                                            | B   | C    | D           | E           |
|------|--------------------------------------------------------------|-----|------|-------------|-------------|
| 4515 | TURASHVILI_BREAST_DUCTAL_CARCINOMA_VS_L<br>OBULAR_NORMAL_UP  | 67  | Down | 0.931492049 | 0.974691653 |
| 4516 | SENGUPTA_EBNA1_ANTICORRELATED                                | 126 | Down | 0.931574673 | 0.974691653 |
| 4517 | PYEON_HP_V_POSITIVE_TUMORS_UP                                | 81  | Down | 0.931578308 | 0.974691653 |
| 4518 | KEGG_ERBB_SIGNALING_PATHWAY                                  | 77  | Down | 0.93197702  | 0.974892943 |
| 4519 | SIG_CD40PATHWAYMAP                                           | 34  | Down | 0.932927043 | 0.975609031 |
| 4520 | GRASEMANN_RETINOBLASTOMA_WITH_6P_AMP<br>LIFICATION           | 14  | Up   | 0.933148165 | 0.975609031 |
| 4521 | REACTOME_NCAM_SIGNALING_FOR_NEURITE_O<br>UT_GROWTH           | 59  | Up   | 0.93328102  | 0.975609031 |
| 4522 | REACTOME_PHOSPHOLIPASE_C_MEDIATED_CASC<br>ADE                | 38  | Down | 0.933573646 | 0.975699066 |
| 4523 | KORKOLA_YOLK_SAC_TUMOR                                       | 44  | Up   | 0.933895597 | 0.975819703 |
| 4524 | FUJIWARA_PARK2_IN_LIVER_CANCER_UP                            | 6   | Up   | 0.934187429 | 0.975827569 |
| 4525 | JIANG_AGING_HYPOTHALAMUS_UP                                  | 42  | Up   | 0.934316174 | 0.975827569 |
| 4526 | WONG_IFNA2_RESISTANCE_UP                                     | 14  | Down | 0.936662532 | 0.977672458 |
| 4527 | JAZAG_TGFB1_SIGNALING_VIA_SMAD4_DN                           | 48  | Up   | 0.936701312 | 0.977672458 |
| 4528 | NAKAMURA_LUNG_CANCER_DIFFERENTIATION_<br>MARKERS             | 6   | Down | 0.936703327 | 0.977672458 |
| 4529 | REACTOME_HYALURONAN_METABOLISM                               | 11  | Up   | 0.937336379 | 0.977817027 |
| 4530 | REACTOME_METABOLISM_OF_POLYAMINES                            | 14  | Up   | 0.937452697 | 0.977817027 |
| 4531 | REACTOME_ACTIVATION_OF_CHAPERONE_GENE<br>S_BY_XBP1S          | 43  | Up   | 0.937462674 | 0.977817027 |
| 4532 | KEGG_CHRONIC_MYELOID_LEUKEMIA                                | 65  | Up   | 0.938246134 | 0.978105324 |
| 4533 | CROONQUIST_STROMAL_STIMULATION_DN                            | 9   | Down | 0.938342934 | 0.978105324 |
| 4534 | BIOCARTA_GH_PATHWAY                                          | 23  | Down | 0.938360092 | 0.978105324 |
| 4535 | REACTOME_SYNTHESIS_OF_SUBSTRATES_IN_N_<br>GLYCAN_BIOSYTHESIS | 14  | Down | 0.938679887 | 0.978206461 |
| 4536 | VECCHI_GASTRIC_CANCER_ADVANCED_VS_EARLY<br>_DN               | 87  | Up   | 0.938871175 | 0.978206461 |
| 4537 | REACTOME_RETROGRADE_NEUROTROPHIN_SIG<br>NALLING              | 11  | Up   | 0.939572757 | 0.978721622 |

|      | A                                                                        | B         | C           | D                  | E                  |
|------|--------------------------------------------------------------------------|-----------|-------------|--------------------|--------------------|
| 4538 | MOOTHA_HUMAN_MITODB_6_2002                                               | 399       | Up          | 0.939835503        | 0.978779535        |
| 4539 | ZHOU_TNF_SIGNALING_30MIN                                                 | 48        | Down        | 0.940164201        | 0.978840993        |
| 4540 | REACTOME_AMINE_COMPOUND_SLC_TRANSPORTERS                                 | 10        | Up          | 0.940534997        | 0.978840993        |
| 4541 | BIOCARTA_SPPA_PATHWAY                                                    | 18        | Up          | 0.9406632          | 0.978840993        |
| 4542 | REACTOME_PROCESSIVE_SYNTHESIS_ON_THE_LAGGING_STRAND                      | 15        | Down        | 0.940723164        | 0.978840993        |
| 4543 | SMITH_LIVER_CANCER                                                       | 40        | Up          | 0.941147729        | 0.979067156        |
| 4544 | PID_INSULIN_PATHWAY                                                      | 43        | Down        | 0.941528614        | 0.979247788        |
| 4545 | KORKOLA_TERATOMA                                                         | 30        | Up          | 0.941913789        | 0.979432802        |
| 4546 | GENTLES_LEUKEMIC_STEM_CELL_DN                                            | 10        | Up          | 0.942178563        | 0.979492566        |
| 4547 | NAKAYAMA_SOFT_TISSUE_TUMORS_PCA1_DN                                      | 59        | Up          | 0.942915972        | 0.979957422        |
| 4548 | REACTOME_SHC_MEDIATED_SIGNALLING                                         | 15        | Up          | 0.943040508        | 0.979957422        |
| 4549 | MARTINELLI_IMMATURE_NEUTROPHIL_UP                                        | 1         | Down        | 0.944018931        | 0.980758454        |
| 4550 | HEDVAT_ELF4_TARGETS_UP                                                   | 9         | Up          | 0.944496781        | 0.981024028        |
| 4551 | BIOCARTA_NUCLEARRS_PATHWAY                                               | 6         | Down        | 0.944791646        | 0.981024028        |
| 4552 | <b>TAKADA_GASTRIC_CANCER_COPY_NUMBER_DN</b>                              | <b>21</b> | <b>Down</b> | <b>0.944899543</b> | <b>0.981024028</b> |
| 4553 | THUM_SYSTOLIC_HEART_FAILURE_DN                                           | 213       | Up          | 9.45E-01           | 9.81E-01           |
| 4554 | BIOCARTA_MCM_PATHWAY                                                     | 18        | Down        | 9.46E-01           | 9.81E-01           |
| 4555 | RODRIGUES_NTN1_AND_DCC_TARGETS                                           | 33        | Up          | 0.94579107         | 0.981040188        |
| 4556 | SCHAEFFER_PROSTATE_DEVELOPMENT_AND_CANCER_BOX2_DN                        | 6         | Down        | 0.945848898        | 0.981040188        |
| 4557 | MATZUK_MEIOTIC_AND_DNA_REPAIR                                            | 31        | Down        | 0.946143851        | 0.981040188        |
| 4558 | REN_ALVEOLAR_RHABDOMYOSARCOMA_UP                                         | 77        | Up          | 0.946158759        | 0.981040188        |
| 4559 | <b>SU_SALIVARY_GLAND</b>                                                 | <b>7</b>  | <b>Up</b>   | <b>0.946827189</b> | <b>0.981336996</b> |
| 4560 | BIOCARTA_BCELLSURVIVAL_PATHWAY                                           | 15        | Down        | 0.946980478        | 0.981336996        |
| 4561 | KORKOLA_CHORIOCARCINOMA                                                  | 1         | Up          | 0.947519456        | 0.981336996        |
| 4562 | REACTOME_INHIBITION_OF_REPLICATION_INITIATION_OF_DAMAGED_DNA_BY_RB1_E2F1 | 12        | Up          | 0.947543992        | 0.981336996        |
| 4563 | KIM_ALL_DISORDERS_CALB1_CORR_DN                                          | 16        | Down        | 0.947895304        | 0.981336996        |
| 4564 | BIOCARTA_HCMV_PATHWAY                                                    | 16        | Up          | 0.948067046        | 0.981336996        |

|      | A                                                                                                 | B   | C    | D           | E           |
|------|---------------------------------------------------------------------------------------------------|-----|------|-------------|-------------|
| 4565 | NABA_ECM_GLYCOPROTEINS                                                                            | 124 | Down | 0.948074148 | 0.981336996 |
| 4566 | SCHAEFFER_PROSTATE_DEVELOPMENT_AND_CANCER_BOX6_UP                                                 | 7   | Up   | 0.948223976 | 0.981336996 |
| 4567 | NABA_SECRETED_FACTORS                                                                             | 124 | Down | 0.948314227 | 0.981336996 |
| 4568 | REACTOME_ANTIVIRAL_MECHANISM_BY_INTERFERON_STIMULATED_GENES                                       | 64  | Down | 0.948585564 | 0.981402844 |
| 4569 | WANG_TNF_TARGETS                                                                                  | 12  | Up   | 0.948897305 | 0.981510457 |
| 4570 | KEGG_N_GLYCAN_BIOSYNTHESIS                                                                        | 46  | Down | 0.94968478  | 0.982109999 |
| 4571 | FUJII_YBX1_TARGETS_UP                                                                             | 32  | Down | 0.950098084 | 0.982322417 |
| 4572 | SCHWAB_TARGETS_OF_BMYB_POLYMORPHIC_VARIANTS_UP                                                    | 12  | Down | 0.950819079 | 0.9828528   |
| 4573 | PID_WNT_SIGNALING_PATHWAY                                                                         | 21  | Down | 0.951116261 | 0.982874765 |
| 4574 | FINETTI_BREAST_CANCER_KINOME_GREEN                                                                | 12  | Up   | 0.951448919 | 0.982874765 |
| 4575 | DURCHDEWALD_SKIN_CARCINOGENESIS_UP                                                                | 66  | Down | 0.951464375 | 0.982874765 |
| 4576 | BIOCARTA_IGF1_PATHWAY                                                                             | 19  | Up   | 0.951701528 | 0.982904857 |
| 4577 | JIANG_TIP30_TARGETS_DN                                                                            | 23  | Down | 0.952844062 | 0.983686573 |
| 4578 | SCHAEFFER_PROSTATE_DEVELOPMENT_AND_CANCER_BOX5_UP                                                 | 9   | Up   | 0.952874803 | 0.983686573 |
| 4579 | REACTOME_NFKB_AND_MAP_KINASES_ACTIVATION_MEDIATED_BY_TLR4_SIGNALING_REPERTOIRE                    | 62  | Up   | 0.953784493 | 0.984250619 |
| 4580 | REACTOME_NUCLEOTIDE_BINDING_DOMAIN_LEUCINE_RICH_REPEAT_CONTAINING_RECEPTOR_NLR_SIGNALING_PATHWAYS | 35  | Up   | 0.954168166 | 0.984250619 |
| 4581 | REACTOME_TRAF3_DEPENDENT_IRF_ACTIVATION_PATHWAY                                                   | 13  | Down | 0.954450102 | 0.984250619 |
| 4582 | HADDAD_T_LYMPHOCYTE_AND_NK_PROGENITOR_UP                                                          | 66  | Down | 0.954477621 | 0.984250619 |
| 4583 | MOOTHA_TCA                                                                                        | 16  | Up   | 0.954712053 | 0.984250619 |
| 4584 | JAEGER_METASTASIS_DN                                                                              | 164 | Down | 0.954885463 | 0.984250619 |
| 4585 | PID_AJDISS_2PATHWAY                                                                               | 43  | Down | 0.955321357 | 0.984250619 |
| 4586 | PID_VEGFR1_2_PATHWAY                                                                              | 67  | Up   | 0.955539159 | 0.984250619 |

|      | A                                              | B         | C           | D                  | E                  |
|------|------------------------------------------------|-----------|-------------|--------------------|--------------------|
| 4587 | WEIGEL_OXIDATIVE_STRESS_BY_HNE_AND_TBH         | 55        | Up          | 0.955628793        | 0.984250619        |
| 4588 | DACOSTA_LOW_DOSE_UV_RESPONSE_VIA_ERCC3_XPCS_UP | 13        | Up          | 0.956011879        | 0.984250619        |
| 4589 | AIYAR_COBRA1_TARGETS_DN                        | 28        | Up          | 0.95613384         | 0.984250619        |
| 4590 | KEGG_PROSTATE_CANCER                           | 81        | Down        | 0.956387722        | 0.984250619        |
| 4591 | ZHANG_ANTIVIRAL_RESPONSE_TO_RIBAVIRIN_UP       | 24        | Up          | 0.956535888        | 0.984250619        |
| 4592 | CLASPER_LYMPHATIC_VESSELS_DURING_METASTASIS_DN | 33        | Up          | 0.956670118        | 0.984250619        |
| 4593 | <b>KEGG_GALACTOSE_METABOLISM</b>               | <b>20</b> | <b>Down</b> | <b>0.956738671</b> | <b>0.984250619</b> |
| 4594 | BIOCARTA_INSULIN_PATHWAY                       | 20        | Down        | 9.57E-01           | 9.84E-01           |
| 4595 | ZHAN_MULTIPLE_MYELOMA_CD1_VS_CD2_DN            | 46        | Down        | 9.57E-01           | 9.85E-01           |
| 4596 | BIOCARTA_LECTIN_PATHWAY                        | 5         | Down        | 0.95754887         | 0.984510673        |
| 4597 | BYSTRYKH_HEMATOPOIESIS_STEM_CELL_TRANS         | 717       | Up          | 0.957736073        | 0.984510673        |
| 4598 | WORSCHER_TUMOR_REJECTION_DN                    | 9         | Down        | 0.957985527        | 0.984510673        |
| 4599 | WANG_IMMORTALIZED_BY_HOXA9_AND_MEIS1_DN        | 11        | Up          | 0.958182873        | 0.984510673        |
| 4600 | <b>REACTOME_M_G1_TRANSITION</b>                | <b>76</b> | <b>Up</b>   | <b>0.95848834</b>  | <b>0.984510673</b> |
| 4601 | SAGIV_CD24_TARGETS_UP                          | 21        | Down        | 0.958606711        | 0.984510673        |
| 4602 | KEGG_PENTOSE_AND_GLUCURONATE_INTERCONVERSIONS  | 10        | Up          | 0.959446176        | 0.984510673        |
| 4603 | REACTOME_SIGNALING_BY_THE_B_CELL_RECEPTOR_BCR  | 114       | Down        | 0.959834584        | 0.984510673        |
| 4604 | PID_EPHA2_FWD_PATHWAY                          | 19        | Down        | 0.960000225        | 0.984510673        |
| 4605 | REACTOME_PROTEIN_FOLDING                       | 48        | Down        | 0.96004427         | 0.984510673        |
| 4606 | TERAO_AOX4_TARGETS_SKIN_DN                     | 19        | Up          | 0.960062643        | 0.984510673        |
| 4607 | DASU_IL6_SIGNALING_UP                          | 52        | Up          | 0.960488892        | 0.984510673        |
| 4608 | REACTOME_RECYCLING_OF_BILE_ACIDS_AND_SALT      | 3         | Up          | 0.960640958        | 0.984510673        |
| 4609 | HUANG_DASATINIB_RESISTANCE_DN                  | 61        | Up          | 0.960715571        | 0.984510673        |

|      | A                                                                | B   | C    | D           | E           |
|------|------------------------------------------------------------------|-----|------|-------------|-------------|
| 4610 | PID_NETRIN_PATHWAY                                               | 31  | Up   | 0.960720707 | 0.984510673 |
| 4611 | GAVIN_FOXP3_TARGETS_CLUSTER_T7                                   | 91  | Up   | 0.960739824 | 0.984510673 |
| 4612 | PID_NECTIN_PATHWAY                                               | 29  | Up   | 0.960757399 | 0.984510673 |
| 4613 | REACTOME_TRAF6_MEDIATED_IRF7_ACTIVATION_IN_TLR7_8_OR_9_SIGNALING | 6   | Down | 0.961404555 | 0.984960218 |
| 4614 | BIOCARTA_ERYTH_PATHWAY                                           | 5   | Down | 0.961860468 | 0.985092859 |
| 4615 | MARTORIATI_MDM4_TARGETS_FETAL_LIVER_DN                           | 459 | Down | 0.962173097 | 0.985092859 |
| 4616 | REACTOME_SIGNALING_BY_GPCR                                       | 303 | Up   | 0.962531074 | 0.985092859 |
| 4617 | LIAO_HAVE_SOX4_BINDING_SITES                                     | 35  | Up   | 0.962572638 | 0.985092859 |
| 4618 | KONDO_COLON_CANCER_HCP_WITH_H3K27ME3                             | 3   | Down | 0.962829279 | 0.985092859 |
| 4619 | REACTOME_SHC_RELATED_EVENTS                                      | 16  | Down | 0.962904116 | 0.985092859 |
| 4620 | HUMMERICH_MALIGNANT_SKIN_TUMOR_DN                                | 9   | Up   | 0.962993421 | 0.985092859 |
| 4621 | GUTIERREZ_CHRONIC_LYMPHOCYTIC_LEUKEMIA_UP                        | 8   | Up   | 0.963220403 | 0.985111776 |
| 4622 | MEISSNER_NPC_ICP_WITH_H3K4ME3                                    | 18  | Up   | 0.963933884 | 0.985628133 |
| 4623 | ICHIBA_GRAFT_VERSUS_HOST_DISEASE_35D_DN                          | 31  | Up   | 0.964284203 | 0.985715018 |
| 4624 | KEGG_T_CELL_RECEPTOR_SIGNALING_PATHWAY                           | 82  | Down | 0.964801415 | 0.985715018 |
| 4625 | ST_WNT_BETA_CATENIN_PATHWAY                                      | 30  | Up   | 0.965211877 | 0.985715018 |
| 4626 | REACTOME_AXON_GUIDANCE                                           | 227 | Up   | 0.965296795 | 0.985715018 |
| 4627 | REACTOME_TRAFFICKING_AND_PROCESSING_OF_ENDOSOMAL_TLR             | 8   | Down | 0.965304919 | 0.985715018 |
| 4628 | WANG_METASTASIS_OF_BREAST_CANCER                                 | 11  | Up   | 0.965333556 | 0.985715018 |
| 4629 | REACTOME_MEIOSIS                                                 | 68  | Down | 0.965479175 | 0.985715018 |
| 4630 | TARTE_PLASMA_CELL_VS_PLASMABLAST_DN                              | 294 | Down | 0.965855823 | 0.985886533 |
| 4631 | BENPORATH_MYC_MAX_TARGETS                                        | 740 | Down | 0.966763267 | 0.986139389 |
| 4632 | CARDOSO_RESPONSE_TO_GAMMA_RADIATION_AND_3AB                      | 17  | Down | 0.966919326 | 0.986139389 |

|      | A                                                       | B        | C           | D                  | E                  |
|------|---------------------------------------------------------|----------|-------------|--------------------|--------------------|
| 4633 | SIG_INSULIN_RECEPTOR_PATHWAY_IN_CARDIAC_MYOCYTES        | 47       | Down        | 0.966922148        | 0.986139389        |
| 4634 | <b>REACTOME_PROSTANOID_LIGAND_RECEPTORS</b>             | <b>4</b> | <b>Up</b>   | <b>0.966938368</b> | <b>0.986139389</b> |
| 4635 | WU_ALZHEIMER_DISEASE_DN                                 | 14       | Down        | 9.67E-01           | 9.86E-01           |
| 4636 | KAYO_CALORIE_RESTRICTION_MUSCLE_DN                      | 69       | Down        | 9.68E-01           | 9.87E-01           |
| 4637 | VANHARANTA_UTERINE_FIBROID_UP                           | 41       | Down        | 0.968067234        | 0.986651787        |
| 4638 | REACTOME_TRIF_MEDIATED_TLR3_SIGNALING                   | 66       | Up          | 0.969504242        | 0.987817329        |
| 4639 | PID_REELIN_PATHWAY                                      | 28       | Down        | 0.969816321        | 0.987817329        |
| 4640 | REACTOME_APOBEC3G_MEDIATED_RESISTANCE_TO_HIV1_INFECTION | 5        | Down        | 0.969838009        | 0.987817329        |
| 4641 | <b>REACTOME_DEFENSINS</b>                               | <b>2</b> | <b>Down</b> | <b>0.970188324</b> | <b>0.987961171</b> |
| 4642 | GRABARCZYK_BCL11B_TARGETS_DN                            | 41       | Down        | 0.970535292        | 0.988101541        |
| 4643 | REACTOME_PHOSPHORYLATION_OF_CD3_AND_T_CR_ZETA_CHAINS    | 7        | Down        | 0.971039766        | 0.988402174        |
| 4644 | CHEOK_RESPONSE_TO_MERCAPTOPYRINE_AND_HD_MTX_DN          | 22       | Down        | 0.971412351        | 0.98856846         |
| 4645 | BOYAULT_LIVER_CANCER_SUBCLASS_G23_DN                    | 8        | Down        | 0.972536416        | 0.989499261        |
| 4646 | BANDRES_RESPONSE_TO_CARMUSTIN_MGMT_2_4HR_DN             | 26       | Down        | 0.972815004        | 0.989569622        |
| 4647 | DELASERNA_TARGETS_OF_MYOD_AND_SMARCA4                   | 7        | Up          | 0.973072247        | 0.98958445         |
| 4648 | WATANABE_COLON_CANCER_MSI_VS_MSS_DN                     | 61       | Down        | 0.973248453        | 0.98958445         |
| 4649 | DASU_IL6_SIGNALING_SCAR_UP                              | 29       | Down        | 0.974035893        | 0.990149223        |
| 4650 | BIOCARTA_CTCF_PATHWAY                                   | 18       | Down        | 0.974286674        | 0.990149223        |
| 4651 | ROY_WOUND_BLOOD_VESSEL_DN                               | 15       | Down        | 0.974452905        | 0.990149223        |
| 4652 | REACTOME_TRAFFICKING_OF_AMPA_RECEPTORS                  | 22       | Down        | 0.974642124        | 0.990149223        |
| 4653 | LEE_RECENT_THYMIC_EMIGRANT                              | 197      | Down        | 0.975697219        | 0.990457598        |
| 4654 | YAUCH_HEDGEHOG_SIGNALING_PARACRINE_UP                   | 103      | Down        | 0.975768885        | 0.990457598        |
| 4655 | IKEDA_MIR133_TARGETS_DN                                 | 6        | Down        | 0.975800503        | 0.990457598        |
| 4656 | FUJII_YBX1_TARGETS_DN                                   | 197      | Down        | 0.975876246        | 0.990457598        |



|      | A                                                          | B   | C    | D           | E           |
|------|------------------------------------------------------------|-----|------|-------------|-------------|
| 4657 | BROWNE_HCMV_INFECTION_16HR_UP                              | 212 | Down | 0.976036229 | 0.990457598 |
| 4658 | REACTOME_GAP_JUNCTION_ASSEMBLY                             | 7   | Up   | 0.976203394 | 0.990457598 |
| 4659 | REACTOME_PLATELET_CALCIIUM_HOMEOSTASIS                     | 11  | Up   | 0.976798952 | 0.990849087 |
| 4660 | BIOCARTA_CYTOKINE_PATHWAY                                  | 1   | Up   | 0.977461459 | 0.991095578 |
| 4661 | BUDHU_LIVER_CANCER_METASTASIS_DN                           | 1   | Up   | 0.977461459 | 0.991095578 |
| 4662 | KEGG_MATURITY_ONSET_DIABETES_OF_THE_YOUNG                  | 11  | Up   | 0.978108586 | 0.991326666 |
| 4663 | JAZAG_TGFB1_SIGNALING_DN                                   | 24  | Up   | 0.978108978 | 0.991326666 |
| 4664 | RAY_ALZHEIMERS_DISEASE                                     | 5   | Up   | 0.97835466  | 0.991363021 |
| 4665 | VALK_AML_CLUSTER_3                                         | 28  | Down | 0.979379211 | 0.992010638 |
| 4666 | APPIERTO_RESPONSE_TO_FENRETINIDE_UP                        | 30  | Up   | 0.979656467 | 0.992010638 |
| 4667 | MURAKAMI_UV_RESPONSE_1HR_UP                                | 12  | Down | 0.979716811 | 0.992010638 |
| 4668 | GOUYER_TUMOR_INVASIVENESS                                  | 7   | Down | 0.979833576 | 0.992010638 |
| 4669 | REACTOME_CDC6_ASSOCIATION_WITH_THE_ORC_ORIGIN_COMPLEX      | 11  | Down | 0.980069035 | 0.992036459 |
| 4670 | ROYLANCE_BREAST_CANCER_16Q_COPY_NUMBER_UP                  | 50  | Up   | 0.980632383 | 0.992259638 |
| 4671 | SAKAI_TUMOR_INFILTRATING_MONOCYTES_UP                      | 26  | Up   | 0.980709526 | 0.992259638 |
| 4672 | BILANGES_SERUM_SENSITIVE_GENES                             | 73  | Down | 0.981192202 | 0.992485752 |
| 4673 | BASAKI_YBX1_TARGETS_UP                                     | 276 | Down | 0.9815205   | 0.992485752 |
| 4674 | PID_NEPHRIN_NEPH1_PATHWAY                                  | 28  | Down | 0.981780817 | 0.992485752 |
| 4675 | REACTOME_MITOCHONDRIAL_TRNA_AMINOACYLATION                 | 21  | Down | 0.981953312 | 0.992485752 |
| 4676 | SA_PROGRAMMED_CELL_DEATH                                   | 11  | Up   | 9.82E-01    | 9.92E-01    |
| 4677 | REACTOME_CYCLIN_E_ASSOCIATED_EVENTS_DURING_G1_S_TRANSITION | 62  | Down | 9.82E-01    | 9.92E-01    |
| 4678 | GROSS_HIF1A_TARGETS_UP                                     | 7   | Down | 0.982529445 | 0.992485752 |
| 4679 | WONG_MITOCHONDRIA_GENE_MODULE                              | 209 | Down | 0.982613407 | 0.992485752 |
| 4680 | ZIRN_TRETINOIN_RESPONSE_WT1_DN                             | 5   | Down | 0.983507938 | 0.993176962 |
| 4681 | BIOCARTA_ASBCCELL_PATHWAY                                  | 5   | Down | 0.984136273 | 0.993396189 |
| 4682 | KUROZUMI_RESPONSE_TO_ONCOCYTIC_VIRUS_AND_CYCLIC_RGD        | 3   | Up   | 0.984145515 | 0.993396189 |

|      | A                                                                               | B   | C    | D           | E           |
|------|---------------------------------------------------------------------------------|-----|------|-------------|-------------|
| 4683 | BIOCARTA_TFF_PATHWAY                                                            | 18  | Down | 0.984950801 | 0.993996697 |
| 4684 | PID_RAC1_PATHWAY                                                                | 50  | Up   | 0.986716059 | 0.995565531 |
| 4685 | LIU_CDX2_TARGETS_UP                                                             | 18  | Down | 0.987172845 | 0.995813769 |
| 4686 | REACTOME_SIGNALING_BY_ERBB2                                                     | 90  | Up   | 0.987658898 | 0.996091417 |
| 4687 | JIANG_HYPOXIA_CANCER                                                            | 80  | Up   | 0.988727607 | 0.996956454 |
| 4688 | REACTOME_POST_TRANSLATIONAL_MODIFICATI<br>ON_SYNTHESIS_OF_GPI_ANCHORED_PROTEINS | 26  | Up   | 0.989370367 | 0.997391718 |
| 4689 | REACTOME_ACTIVATION_OF_NF_KAPPAB_IN_B_<br>CELLS                                 | 60  | Down | 0.989731089 | 0.997470322 |
| 4690 | REACTOME_IKK_COMPLEX_RECRUITMENT_MEDIA<br>TED_BY_RIP1                           | 6   | Down | 0.989870549 | 0.997470322 |
| 4691 | OHM_METHYLATED_IN_ADULT_CANCERS                                                 | 20  | Up   | 0.990765428 | 0.997537065 |
| 4692 | NAKAMURA_TUMOR_ZONE_PERIPHERAL_VS_CE<br>NTRAL_DN                                | 551 | Up   | 0.990914706 | 0.997537065 |
| 4693 | DAVICIONI_MOLECULAR_ARMS_VS_ERMS_DN                                             | 163 | Up   | 0.991223672 | 0.997537065 |
| 4694 | LIU_PROSTATE_CANCER_UP                                                          | 86  | Down | 0.991278461 | 0.997537065 |
| 4695 | WONG_PROTEASOME_GENE_MODULE                                                     | 49  | Down | 0.991339381 | 0.997537065 |
| 4696 | ZEMBUTSU_SENSITIVITY_TO_VINBLASTINE                                             | 12  | Down | 0.99143621  | 0.997537065 |
| 4697 | REACTOME_CLASS_I_MHC_MEDIATED_ANTIGEN_<br>PROCESSING_PRESENTATION               | 215 | Up   | 0.9917282   | 0.997537065 |
| 4698 | CHIANG_LIVER_CANCER_SUBCLASS_POLYSOMY7<br>_UP                                   | 54  | Up   | 0.991841306 | 0.997537065 |
| 4699 | THILLAINADESAN_ZNF217_TARGETS_DN                                                | 8   | Down | 0.991982806 | 0.997537065 |
| 4700 | CHOI_ATL_STAGE_PREDICTOR                                                        | 42  | Up   | 0.992047972 | 0.997537065 |
| 4701 | DARWICHE_PAPILLOMA_PROGRESSION_RISK                                             | 51  | Up   | 0.992688292 | 0.997833206 |
| 4702 | REACTOME_CLASS_C_3_METABOTROPIC_GLUTA<br>MATE_PHEROMONE_RECEPTORS               | 7   | Up   | 0.992764847 | 0.997833206 |
| 4703 | CHOW_RASSF1_TARGETS_DN                                                          | 27  | Up   | 0.993172246 | 0.998030384 |
| 4704 | HOLLEMAN_VINCRIStINE_RESISTANCE_ALL_UP                                          | 27  | Down | 0.993964977 | 0.998614612 |
| 4705 | RIZ_ERYTHROID_DIFFERENTIATION_APOBEC2                                           | 16  | Down | 0.994335885 | 0.998759566 |
| 4706 | RAHMAN_TP53_TARGETS_PHOSPHORYLATED                                              | 21  | Down | 0.994532013 | 0.998759566 |
| 4707 | DARWICHE_PAPILLOMA_RISK_LOW_UP                                                  | 124 | Up   | 0.995341148 | 0.998769172 |

|      | A                                                      | B   | C    | D           | E           |
|------|--------------------------------------------------------|-----|------|-------------|-------------|
| 4708 | REACTOME_IMMUNE_SYSTEM                                 | 657 | Up   | 0.995369765 | 0.998769172 |
| 4709 | YAMANAKA_GLIOMASTOMA_SURVIVAL_DN                       | 8   | Down | 0.995514835 | 0.998769172 |
| 4710 | WEBER_METHYLATED_HCP_IN_FIBROBLAST_UP                  | 3   | Down | 0.995748796 | 0.998769172 |
| 4711 | KONDO_COLON_CANCER_HCP_WITH_H3K27ME1                   | 22  | Up   | 0.995793058 | 0.998769172 |
| 4712 | KEGG_OXIDATIVE_PHOSPHORYLATION                         | 118 | Up   | 0.995965963 | 0.998769172 |
| 4713 | REACTOME_L1CAM_INTERACTIONS                            | 79  | Up   | 0.996156383 | 0.998769172 |
| 4714 | REACTOME_NA_CL_DEPENDENT_NEUROTRANSMITTER_TRANSPORTERS | 5   | Up   | 0.996360678 | 0.998769172 |
| 4715 | WU_HBX_TARGETS_2_UP                                    | 19  | Down | 0.996613184 | 0.998769172 |
| 4716 | REACTOME_EICOSANOID_LIGAND_BINDING_RECEPTORS           | 7   | Up   | 0.996747004 | 0.998769172 |
| 4717 | RUTELLA_RESPONSE_TO_HGF_DN                             | 193 | Up   | 9.97E-01    | 9.99E-01    |
| 4718 | KYNG_ENVIRONMENTAL_STRESS_RESPONSE_NOT_BY_UV_IN_OLD    | 21  | Down | 9.97E-01    | 9.99E-01    |
| 4719 | GAJATE_RESPONSE_TO TRABECTEDIN_DN                      | 18  | Down | 0.997291675 | 0.998769172 |
| 4720 | BIOCARTA_NO2IL12_PATHWAY                               | 5   | Down | 0.997500893 | 0.998769172 |
| 4721 | PID_ILK_PATHWAY                                        | 43  | Up   | 0.997899409 | 0.998955306 |
| 4722 | TESAR_ALK_TARGETS_EPISC_3D_UP                          | 4   | Down | 0.99810963  | 0.998955306 |
| 4723 | SHIPP_DLBCL_CURED_VS_FATAL_UP                          | 22  | Up   | 0.998731777 | 0.999366295 |
| 4724 | SERVITJA_ISLET_HNF1A_TARGETS_DN                        | 65  | Up   | 0.99903384  | 0.999456891 |
| 4725 | SASAI_TARGETS_OF_CXCR6_AND_PTCH1_UP                    | 11  | Up   | 0.999712846 | 0.99992447  |
| 4726 | SUZUKI_RESPONSE_TO_TSA_AND_DECITABINE_1B               | 15  | Down | 0.999984563 | 0.999984563 |
